# Supplementary material for: Vitamins D2 and D3 have overlapping but different effects on human gene expression revealed through analysis of blood transcriptomes in a randomised double-blind placebo-controlled food-fortification trial
Source: medRxiv preprint, doi:10.1101/2020.12.16.20247700, version 2 (2021-02-22)
Supplement: Supplemental data file 2 [file 247700_file11.xlsx]

## Sheet: res.Eth_sigDT
ProbeName	SystematicName	REFSEQ	ENTREZID	GENENAME	SYMBOL	logFC.WE.D2.V3.v.WE.D2.V1	adj.P.Val.WE.D2.V3.v.WE.D2.V1	sig.WE.D2.V3.v.WE.D2.V1	logFC.WE.D3.V3.v.WE.D3.V1	adj.P.Val.WE.D3.V3.v.WE.D3.V1	sig.WE.D3.V3.v.WE.D3.V1	logFC.WE.P.V3.v.WE.P.V1	adj.P.Val.WE.P.V3.v.WE.P.V1	sig.WE.P.V3.v.WE.P.V1	logFC.SA.D2.V3.v.SA.D2.V1	adj.P.Val.SA.D2.V3.v.SA.D2.V1	sig.SA.D2.V3.v.SA.D2.V1	logFC.SA.D3.V3.v.SA.D3.V1	adj.P.Val.SA.D3.V3.v.SA.D3.V1	sig.SA.D3.V3.v.SA.D3.V1	logFC.SA.P.V3.v.SA.P.V1	adj.P.Val.SA.P.V3.v.SA.P.V1	sig.SA.P.V3.v.SA.P.V1	logFC.(WE.D2.V3.v.WE.D2.V1).v.(WE.P.V3.v.WE.P.V1)	adj.P.Val.(WE.D2.V3.v.WE.D2.V1).v.(WE.P.V3.v.WE.P.V1)	sig.(WE.D2.V3.v.WE.D2.V1).v.(WE.P.V3.v.WE.P.V1)	logFC.(WE.D3.V3.v.WE.D3.V1).v.(WE.P.V3.v.WE.P.V1)	adj.P.Val.(WE.D3.V3.v.WE.D3.V1).v.(WE.P.V3.v.WE.P.V1)	sig.(WE.D3.V3.v.WE.D3.V1).v.(WE.P.V3.v.WE.P.V1)	logFC.(WE.D3.V3.v.WE.D3.V1).v.(WE.D2.V3.v.WE.D2.V1)	adj.P.Val.(WE.D3.V3.v.WE.D3.V1).v.(WE.D2.V3.v.WE.D2.V1)	sig.(WE.D3.V3.v.WE.D3.V1).v.(WE.D2.V3.v.WE.D2.V1)	logFC.(SA.D2.V3.v.SA.D2.V1).v.(SA.P.V3.v.SA.P.V1)	adj.P.Val.(SA.D2.V3.v.SA.D2.V1).v.(SA.P.V3.v.SA.P.V1)	sig.(SA.D2.V3.v.SA.D2.V1).v.(SA.P.V3.v.SA.P.V1)	logFC.(SA.D3.V3.v.SA.D3.V1).v.(SA.P.V3.v.SA.P.V1)	adj.P.Val.(SA.D3.V3.v.SA.D3.V1).v.(SA.P.V3.v.SA.P.V1)	sig.(SA.D3.V3.v.SA.D3.V1).v.(SA.P.V3.v.SA.P.V1)	logFC.(SA.D3.V3.v.SA.D3.V1).v.(SA.D2.V3.v.SA.D2.V1)	adj.P.Val.(SA.D3.V3.v.SA.D3.V1).v.(SA.D2.V3.v.SA.D2.V1)	sig.(SA.D3.V3.v.SA.D3.V1).v.(SA.D2.V3.v.SA.D2.V1)
A_23_P117082	NM_015987	NM_015987	50865	heme binding protein 1	HEBP1	0.0449453	0.788036	0	0.0434966	0.811003	0	0.108378	0.297885	0	0.0761033	0.999232	0	0.0169355	0.985653	0	-0.274032	0.156682	0	-0.0634322	0.922701	0	-0.064881	0.944936	0	-0.00144879	0.999957	0	0.350135	0.30313	0	0.290967	0.443752	0	-0.0591678	0.999975	0
A_21_P0000509	NR_024244	NR_024244	100170228	small ILF3/NF90-associated RNA G2	SNAR-G2	0.248846	0.170361	0	0.239825	0.16435	0	0.012932	0.958054	0	0.298085	0.999232	0	0.209466	0.716896	0	0.275565	0.383261	0	0.235914	0.738659	0	0.226893	0.850492	0	-0.00902071	0.999957	0	0.0225203	0.975975	0	-0.0660991	0.928739	0	-0.0886193	0.999975	0
A_21_P0000744	NR_038269	NR_038269	100506844	uncharacterized LOC100506844	LOC100506844	0.191604	0.0402433	1	-0.0668978	0.582141	0	0.0285392	0.799432	0	0.00339076	0.999232	0	-0.00908786	0.990627	0	0.31065	0.0487474	1	0.163065	0.701072	0	-0.095437	0.878281	0	-0.258502	0.999957	0	-0.30726	0.285434	0	-0.319738	0.326704	0	-0.0124786	0.999975	0
A_23_P110167	NM_002413	NM_002413	4258	microsomal glutathione S-transferase 2	MGST2	0.086556	0.224364	0	0.00857707	0.948157	0	0.0209741	0.784428	0	0.0557069	0.999232	0	-0.117558	0.512868	0	0.111975	0.347481	0	0.0655819	0.818664	0	-0.012397	0.982679	0	-0.077979	0.999957	0	-0.0562684	0.808125	0	-0.229533	0.313519	0	-0.173265	0.999975	0
A_33_P3211513	NM_001162407	NM_001162407	1195	CDC like kinase 1	CLK1	0.0159011	0.937882	0	0.125766	0.333604	0	0.0377329	0.786356	0	-0.00118677	0.999232	0	0.211982	0.515314	0	0.190685	0.385227	0	-0.0218318	0.981617	0	0.0880335	0.916031	0	0.109865	0.999957	0	-0.191872	0.602229	0	0.021296	0.969657	0	0.213168	0.999975	0
A_33_P3414202	NM_001170704	NM_001170704	55796	muscleblind like splicing regulator 3	MBNL3	0.0287735	0.928242	0	0.00720889	0.986873	0	0.271149	0.0951773	0	0.0428038	0.999232	0	0.0962186	0.930318	0	-0.177155	0.652215	0	-0.242375	0.755588	0	-0.26394	0.850492	0	-0.0215646	0.999957	0	0.219958	0.727752	0	0.273373	0.689744	0	0.0534148	0.999975	0
A_33_P3316686	NM_016230	NM_016230	51167	cytochrome b5 reductase 4	CYB5R4	0.0152414	0.937882	0	-0.0506802	0.76914	0	-0.100476	0.341093	0	0.0407683	0.999232	0	0.103317	0.819614	0	0.100239	0.673303	0	0.115718	0.812978	0	0.0497962	0.961505	0	-0.0659216	0.999957	0	-0.0594705	0.89293	0	0.00307834	0.995088	0	0.0625488	0.999975	0
A_33_P3300975	NM_014620	NM_014620	3221	homeobox C4	HOXC4	-0.0245682	0.866537	0	-0.00934759	0.962151	0	-0.0180502	0.883459	0	0.141994	0.999232	0	0.0167993	0.980354	0	-0.0772807	0.698923	0	-0.00651799	0.994831	0	0.00870262	0.991533	0	0.0152206	0.999957	0	0.219274	0.432129	0	0.09408	0.801685	0	-0.125194	0.999975	0
A_33_P3263061	NM_016282	NM_016282	50808	adenylate kinase 3	AK3	-0.0332008	0.833838	0	-0.0522626	0.73195	0	-0.025165	0.847774	0	-0.102117	0.999232	0	0.0706579	0.891281	0	-0.301252	0.0871117	0	-0.0080358	0.994074	0	-0.0270975	0.976027	0	-0.0190617	0.999957	0	0.199135	0.530656	0	0.371909	0.313519	0	0.172774	0.999975	0
A_24_P278460	NM_032228	NM_032228	84188	fatty acyl-CoA reductase 1	FAR1	0.0235186	0.905429	0	0.119349	0.394838	0	0.130503	0.239099	0	-0.0936203	0.999232	0	0.234778	0.478403	0	0.139074	0.569389	0	-0.106985	0.84651	0	-0.0111547	0.991748	0	0.09583	0.999957	0	-0.232694	0.532742	0	0.095704	0.851439	0	0.328398	0.999975	0
A_21_P0014651	ENST00000543573	ENST00000543573				0.0922384	0.480924	0	0.0878792	0.483324	0	0.156931	0.0777595	0	-0.165795	0.999232	0	0.142199	0.669158	0	-0.0264385	0.923513	0	-0.0646922	0.908058	0	-0.0690514	0.934239	0	-0.00435921	0.999957	0	-0.139357	0.680477	0	0.168637	0.647832	0	0.307994	0.999975	0
A_23_P340890	NM_001195753	NM_001195753	90326	THAP domain containing 3	THAP3	0.00583787	0.971203	0	0.0982063	0.320393	0	0.00650211	0.96106	0	-0.0395522	0.999232	0	0.0976272	0.769547	0	0.283064	0.0606173	0	-0.000664239	0.999123	0	0.0917042	0.876296	0	0.0923684	0.999957	0	-0.322616	0.254555	0	-0.185437	0.552268	0	0.137179	0.999975	0
A_21_P0005185	TCONS_00012833	TCONS_00012833				0.031567	0.844409	0	0.0755923	0.573472	0	0.0733151	0.483223	0	0.0330353	0.999232	0	0.0796535	0.8665	0	-0.108187	0.613909	0	-0.0417481	0.952595	0	0.00227715	0.999185	0	0.0440252	0.999957	0	0.141222	0.677602	0	0.18784	0.611681	0	0.0466182	0.999975	0
A_21_P0010885	NM_030969	NM_030969	81853	transmembrane protein 14B	TMEM14B	0.259289	0.0227496	1	0.186474	0.104065	0	-0.0193689	0.898043	0	0.252514	0.999232	0	0.0656433	0.916501	0	-0.0485752	0.863028	0	0.278658	0.685006	0	0.205843	0.835508	0	-0.0728149	0.999957	0	0.301089	0.386249	0	0.114219	0.807814	0	-0.186871	0.999975	0
A_33_P3379396	NM_006121	NM_006121	3848	keratin 1	KRT1	-0.0102109	0.982715	0	-0.192405	0.53931	0	0.278544	0.214383	0	0.096027	0.999232	0	0.0975013	0.948574	0	-0.586498	0.175636	0	-0.288755	0.780512	0	-0.470949	0.828696	0	-0.182194	0.999957	0	0.682525	0.362182	0	0.683999	0.416255	0	0.00147431	0.999975	0
A_23_P109034	NM_002999	NM_002999	6385	syndecan 4	SDC4	-0.0017025	0.993849	0	-0.0329573	0.842036	0	-0.0392014	0.730361	0	0.0487853	0.999232	0	-0.0431294	0.942527	0	-0.103134	0.613641	0	0.0374989	0.958796	0	0.00624403	0.995698	0	-0.0312548	0.999957	0	0.151919	0.632302	0	0.0600043	0.885892	0	-0.0919148	0.999975	0
A_33_P3732466	XR_110899	XR_110899				-0.0104303	0.948145	0	-0.00297353	0.988443	0	-0.0785245	0.378953	0	0.098753	0.999232	0	0.115424	0.716896	0	-0.0169741	0.947557	0	0.0680942	0.882686	0	0.0755509	0.908064	0	0.00745678	0.999957	0	0.115727	0.709233	0	0.132398	0.697563	0	0.0166712	0.999975	0
A_33_P3402773	A_33_P3402773	A_33_P3402773				0.140531	0.43036	0	0.136692	0.419431	0	-0.13783	0.30657	0	0.0999851	0.999232	0	0.159778	0.765779	0	-0.0961975	0.767916	0	0.278361	0.685006	0	0.274522	0.828696	0	-0.00383863	0.999957	0	0.196183	0.677804	0	0.255975	0.622013	0	0.0597926	0.999975	0
A_33_P3365553	NR_024420	NR_024420	389634	long intergenic non-protein coding RNA 937	LINC00937	-0.0731376	0.627087	0	-0.0231426	0.912521	0	-0.180828	0.055156	0	0.0920255	0.999232	0	0.0217773	0.979788	0	-0.237484	0.221863	0	0.10769	0.82833	0	0.157685	0.850492	0	0.049995	0.999957	0	0.32951	0.322059	0	0.259261	0.495354	0	-0.0702482	0.999975	0
A_23_P103837	NM_001127320	NM_001127320	9898	ubiquitin associated protein 2 like	UBAP2L	-0.128986	0.069368	0	-0.00293941	0.986031	0	-0.10185	0.0920905	0	-0.0550944	0.999232	0	-0.121569	0.542304	0	-0.0733505	0.610729	0	-0.0271367	0.955798	0	0.0989101	0.850492	0	0.126047	0.999957	0	0.0182561	0.951351	0	-0.0482182	0.869761	0	-0.0664743	0.999975	0
A_33_P3402035	NM_004295	NM_004295	9618	TNF receptor associated factor 4	TRAF4	0.0401198	0.74597	0	-0.0642518	0.547246	0	0.0104241	0.930054	0	0.0347992	0.999232	0	0.0318877	0.950512	0	-0.0514693	0.789138	0	0.0296957	0.961896	0	-0.0746759	0.895557	0	-0.104372	0.999957	0	0.0862685	0.769442	0	0.083357	0.808332	0	-0.00291146	0.999975	0
A_21_P0013668	NM_001166137	NM_001166137	645961	SPATA31 subfamily C member 2	SPATA31C2	0.0772497	0.785965	0	0.0230883	0.953334	0	0.104928	0.60849	0	0.154432	0.999232	0	0.0937378	0.933997	0	-0.287326	0.432314	0	-0.0276786	0.984482	0	-0.08184	0.964871	0	-0.0541614	0.999957	0	0.441758	0.439435	0	0.381064	0.569742	0	-0.060694	0.999975	0
A_23_P61637	NM_002108	NM_002108	3034	histidine ammonia-lyase	HAL	-0.190938	0.167249	0	-0.221076	0.0778518	0	-0.0998392	0.426889	0	-0.0710468	0.999232	0	0.00768757	0.992645	0	-0.177183	0.477889	0	-0.0910989	0.885092	0	-0.121237	0.887155	0	-0.0301381	0.999957	0	0.106137	0.820468	0	0.184871	0.693016	0	0.0787343	0.999975	0
A_23_P11543	NM_000147	NM_000147	2517	alpha-L-fucosidase 1	FUCA1	-0.0544793	0.660672	0	-0.0951174	0.34011	0	0.0313995	0.765558	0	-0.10047	0.999232	0	-0.105871	0.736414	0	0.0610495	0.760898	0	-0.0858788	0.831885	0	-0.126517	0.850492	0	-0.0406381	0.999957	0	-0.16152	0.557603	0	-0.166921	0.595127	0	-0.00540122	0.999975	0
A_23_P103765	NM_002001	NM_002001	2205	Fc fragment of IgE receptor Ia	FCER1A	0.133815	0.65026	0	0.109296	0.727073	0	0.297041	0.109676	0	-0.04549	0.999232	0	0.340724	0.593944	0	0.350766	0.381882	0	-0.163226	0.875303	0	-0.187745	0.896355	0	-0.0245194	0.999957	0	-0.396256	0.547013	0	-0.0100429	0.992154	0	0.386214	0.999975	0
A_33_P3219429	NM_005871	NM_005871	10285	survival motor neuron domain containing 1	SMNDC1	-0.0604507	0.635314	0	-0.111978	0.260931	0	0.0148432	0.903233	0	0.108707	0.999232	0	-0.11274	0.726165	0	-0.0720231	0.723505	0	-0.0752938	0.860803	0	-0.126822	0.850492	0	-0.0515278	0.999957	0	0.180731	0.52502	0	-0.0407173	0.920783	0	-0.221448	0.999975	0
A_21_P0014120	XR_158775	XR_158775				0.120488	0.254765	0	0.0768328	0.506773	0	0.0447133	0.668847	0	-0.0844758	0.999232	0	0.00749361	0.991567	0	0.00411085	0.989704	0	0.0757747	0.862313	0	0.0321194	0.968684	0	-0.0436552	0.999957	0	-0.0885867	0.789536	0	0.00338276	0.993954	0	0.0919694	0.999975	0
A_33_P3372397	AK130111	AK130111				0.0209261	0.873152	0	0.034416	0.795384	0	-0.0932736	0.211588	0	0.0861729	0.999232	0	0.0457954	0.920845	0	-0.0262869	0.902794	0	0.1142	0.744813	0	0.12769	0.84917	0	0.0134899	0.999957	0	0.11246	0.67826	0	0.0720823	0.835172	0	-0.0403775	0.999975	0
A_23_P118888	NM_000430	NM_000430	5048	platelet activating factor acetylhydrolase 1b regulatory subunit 1	PAFAH1B1	-0.110549	0.193931	0	-0.0549643	0.588465	0	-0.0640488	0.395292	0	-0.0277667	0.999232	0	-0.00430805	0.993322	0	0.0349872	0.852476	0	-0.0465006	0.915712	0	0.00908451	0.988895	0	0.0555851	0.999957	0	-0.0627538	0.824611	0	-0.0392952	0.906502	0	0.0234586	0.999975	0
A_33_P3350056	NM_005952	NM_005952	4501	metallothionein 1X	MT1X	-0.00660961	0.98411	0	0.309486	0.0735369	0	0.00141525	0.995225	0	0.0422427	0.999232	0	-0.235353	0.690189	0	-0.0265202	0.957984	0	-0.00802485	0.996161	0	0.308071	0.835508	0	0.316096	0.999957	0	0.0687629	0.925401	0	-0.208833	0.7604	0	-0.277596	0.999975	0
A_24_P787889	NM_001242313	NM_001242313	728229	transmembrane protein 191B	TMEM191B	0.197743	0.0402461	1	0.0795782	0.501777	0	0.0472939	0.657152	0	0.000183397	0.999672	0	0.0746034	0.865258	0	0.238392	0.15243	0	0.15045	0.713223	0	0.0322843	0.968684	0	-0.118165	0.999957	0	-0.238209	0.412319	0	-0.163789	0.636612	0	0.07442	0.999975	0
A_33_P3227225	A_33_P3227225	A_33_P3227225				-0.115436	0.430757	0	0.069019	0.680521	0	-0.00121565	0.994322	0	0.13563	0.999232	0	0.0466272	0.948574	0	-0.0787024	0.769362	0	-0.114221	0.832887	0	0.0702346	0.944235	0	0.184455	0.999957	0	0.214332	0.559389	0	0.12533	0.790593	0	-0.0890028	0.999975	0
A_21_P0014626	NM_007282	NM_007282	11342	ring finger protein 13	RNF13	-0.113173	0.663475	0	0.0488151	0.885089	0	0.0528781	0.816778	0	-0.292532	0.999232	0	0.313697	0.55926	0	0.0279184	0.957984	0	-0.166051	0.844664	0	-0.00406299	0.999185	0	0.161988	0.999957	0	-0.320451	0.583009	0	0.285779	0.673925	0	0.606229	0.999975	0
A_23_P203658	NM_007166	NM_007166	8301	phosphatidylinositol binding clathrin assembly protein	PICALM	-0.0928216	0.551252	0	-0.0962868	0.511512	0	-0.0279314	0.853541	0	0.00809909	0.999232	0	0.00666894	0.993322	0	0.0914153	0.725945	0	-0.0648902	0.925272	0	-0.0683554	0.945872	0	-0.00346521	0.999957	0	-0.0833162	0.850618	0	-0.0847463	0.864545	0	-0.00143014	0.999975	0
A_33_P3354678	AF230412	AF230412				-0.0346888	0.805751	0	-0.0150685	0.934601	0	-0.0821101	0.353195	0	-0.0905782	0.999232	0	-0.136056	0.639264	0	-0.166122	0.3324	0	0.0474213	0.934048	0	0.0670417	0.926745	0	0.0196203	0.999957	0	0.0755436	0.823643	0	0.0300656	0.941945	0	-0.045478	0.999975	0
A_23_P102060	NM_006751	NM_006751	6744	sperm specific antigen 2	SSFA2	-0.0859179	0.578687	0	0.0827391	0.585872	0	0.0671469	0.586186	0	-0.0524665	0.999232	0	0.249839	0.420924	0	0.155479	0.496366	0	-0.153065	0.74922	0	0.0155922	0.987989	0	0.168657	0.999957	0	-0.207945	0.564678	0	0.0943601	0.846992	0	0.302305	0.999975	0
A_23_P206140	NM_018602	NM_018602	55466	DnaJ heat shock protein family (Hsp40) member A4	DNAJA4	-0.0492657	0.809417	0	-0.0548048	0.801039	0	0.162219	0.178972	0	0.0930613	0.999232	0	0.127897	0.813225	0	-0.276237	0.252466	0	-0.211485	0.71235	0	-0.217024	0.839527	0	-0.00553911	0.999957	0	0.369298	0.364361	0	0.404134	0.376522	0	0.0348352	0.999975	0
A_23_P14389	NM_014977	NM_014977	22985	apoptotic chromatin condensation inducer 1	ACIN1	0.0130754	0.958011	0	-0.13546	0.419174	0	-0.339477	0.00524823	-1	-0.077705	0.999232	0	-0.141936	0.798189	0	-0.0483477	0.896158	0	0.352552	0.685006	0	0.204017	0.850492	0	-0.148535	0.999957	0	-0.0293573	0.963957	0	-0.0935885	0.877011	0	-0.0642313	0.999975	0
A_33_P3323435	NM_033141	NM_033141	4293	mitogen-activated protein kinase kinase kinase 9	MAP3K9	-0.0225216	0.835467	0	-0.0666465	0.423842	0	0.0745894	0.250637	0	0.0505312	0.999232	0	-0.098966	0.663833	0	-0.0956088	0.489887	0	-0.097111	0.746081	0	-0.141236	0.827784	0	-0.0441248	0.999957	0	0.14614	0.497007	0	-0.00335717	0.992143	0	-0.149497	0.999975	0
A_33_P3241482	NM_012279	NM_012279	23567	zinc finger protein 346	ZNF346	0.0621863	0.492021	0	-0.0024531	0.987746	0	0.0298373	0.711749	0	-0.0467941	0.999232	0	0.0680083	0.808721	0	-0.106449	0.43436	0	0.032349	0.94544	0	-0.0322904	0.961505	0	-0.0646394	0.999957	0	0.0596548	0.817722	0	0.174457	0.47482	0	0.114802	0.999975	0
A_23_P145541	NM_014845	NM_014845	9896	FIG4 phosphoinositide 5-phosphatase	FIG4	-0.266465	0.00241461	-1	-0.0338913	0.811003	0	-0.0816363	0.318743	0	-0.0976257	0.999232	0	-0.0776696	0.832832	0	0.287356	0.0506687	0	-0.184829	0.685006	0	0.047745	0.94771	0	0.232574	0.999957	0	-0.384982	0.180825	0	-0.365025	0.266555	0	0.0199561	0.999975	0
A_23_P144096	NM_145071	NM_145071	1154	cytokine inducible SH2 containing protein	CISH	0.0407289	0.851575	0	0.32145	0.014726	1	-0.134074	0.306795	0	0.200755	0.999232	0	0.00380075	0.996467	0	-0.059653	0.861889	0	0.174803	0.767582	0	0.455524	0.827784	0	0.280721	0.999957	0	0.260408	0.548654	0	0.0634537	0.918714	0	-0.196954	0.999975	0
A_33_P3299510	NM_001008271	NM_001008271	642658	scleraxis bHLH transcription factor	SCX	-0.113236	0.193073	0	-0.0108542	0.946564	0	0.0227996	0.814036	0	-0.0162444	0.999232	0	0.0437366	0.921538	0	0.0490742	0.787498	0	-0.136035	0.706914	0	-0.0336538	0.965882	0	0.102381	0.999957	0	-0.0653186	0.822004	0	-0.00533763	0.988655	0	0.059981	0.999975	0
A_23_P76705	NM_006322	NM_006322	10426	tubulin gamma complex associated protein 3	TUBGCP3	-0.135154	0.155678	0	-0.1178	0.204628	0	-0.0913677	0.26512	0	-0.12298	0.999232	0	-0.0837662	0.813502	0	0.0682619	0.726828	0	-0.0437861	0.936028	0	-0.0264324	0.972293	0	0.0173537	0.999957	0	-0.191242	0.476899	0	-0.152028	0.63405	0	0.0392142	0.999975	0
A_23_P63896	NM_000043	NM_000043	355	Fas cell surface death receptor	FAS	-0.1229	0.587085	0	0.034461	0.916603	0	0.131756	0.429424	0	-0.186927	0.999232	0	0.265224	0.603788	0	0.236607	0.474273	0	-0.254656	0.719429	0	-0.0972946	0.946046	0	0.157361	0.999957	0	-0.423535	0.408073	0	0.0286163	0.97238	0	0.452151	0.999975	0
A_21_P0005541	TCONS_00014004	TCONS_00014004				0.0339604	0.823354	0	0.0188988	0.923847	0	-0.00251381	0.987838	0	0.112823	0.999232	0	-0.0632458	0.902534	0	-0.24668	0.153756	0	0.0364742	0.960492	0	0.0214126	0.981249	0	-0.0150616	0.999957	0	0.359504	0.255711	0	0.183435	0.605737	0	-0.176069	0.999975	0
A_23_P101374	NM_030622	NM_030622	29785	cytochrome P450 family 2 subfamily S member 1	CYP2S1	-0.10271	0.249323	0	-0.107387	0.192304	0	-0.101722	0.145612	0	-0.0502689	0.999232	0	-0.131481	0.569019	0	-0.0472245	0.795547	0	-0.000987654	0.998296	0	-0.00566483	0.994661	0	-0.00467718	0.999957	0	-0.00304433	0.993657	0	-0.0842564	0.789765	0	-0.0812121	0.999975	0
A_32_P199252	NM_001017963	NM_001017963	3320	heat shock protein 90 alpha family class A member 1	HSP90AA1	0.123884	0.58041	0	0.199234	0.274662	0	0.0116934	0.962812	0	0.117758	0.999232	0	0.150657	0.830906	0	0.106678	0.781906	0	0.112191	0.897863	0	0.18754	0.874631	0	0.0753492	0.999957	0	0.0110803	0.988706	0	0.0439794	0.95443	0	0.0328991	0.999975	0
A_19_P00811812	NM_201274	NM_201274	23164	myosin phosphatase Rho interacting protein	MPRIP	-0.197016	0.0695347	0	-0.104088	0.400338	0	0.00202016	0.990468	0	0.0230269	0.999232	0	-0.0588348	0.921242	0	0.0663732	0.786362	0	-0.199036	0.685006	0	-0.106108	0.881382	0	0.092928	0.999957	0	-0.0433463	0.921178	0	-0.125208	0.761267	0	-0.0818617	0.999975	0
A_24_P54390	NM_170672	NM_170672	25780	RAS guanyl releasing protein 3	RASGRP3	-0.0929509	0.365938	0	0.0454687	0.719524	0	-0.0109776	0.927209	0	-0.0364334	0.999232	0	-0.0310961	0.953853	0	-0.0375662	0.858558	0	-0.0819733	0.83593	0	0.0564463	0.935587	0	0.13842	0.999957	0	0.00113285	0.998452	0	0.00647012	0.987338	0	0.00533727	0.999975	0
A_33_P3424489	ENST00000390305	ENST00000390305				-0.0822477	0.836162	0	0.0533743	0.915267	0	-0.13067	0.647484	0	-0.672644	0.999232	0	-0.699213	0.238834	0	0.214006	0.702522	0	0.0484223	0.981617	0	0.184044	0.927987	0	0.135622	0.999957	0	-0.88665	0.261081	0	-0.913219	0.315332	0	-0.0265689	0.999975	0
A_33_P3245927	NM_024623	NM_024623	79676	2-oxoglutarate and iron dependent oxygenase domain containing 2	OGFOD2	0.130567	0.15476	0	-0.00703533	0.969975	0	-0.070232	0.399332	0	0.0166361	0.999232	0	-0.0297291	0.955641	0	0.145318	0.364452	0	0.200799	0.685006	0	0.0631966	0.921697	0	-0.137602	0.999957	0	-0.128682	0.642323	0	-0.175047	0.56093	0	-0.0463651	0.999975	0
A_23_P98183	NM_005343	NM_005343	3265	HRas proto-oncogene, GTPase	HRAS	0.0498511	0.730884	0	0.112626	0.302051	0	0.0671609	0.508107	0	0.0679616	0.999232	0	-0.00403643	0.995165	0	0.233098	0.179193	0	-0.0173098	0.982652	0	0.0454652	0.961335	0	0.0627751	0.999957	0	-0.165136	0.599224	0	-0.237134	0.489306	0	-0.0719981	0.999975	0
A_21_P0000880	NR_040012	NR_040012	100506436	SPAG5 antisense RNA 1	SPAG5-AS1	0.0123365	0.939848	0	0.0440784	0.759846	0	0.00781999	0.953785	0	0.0172694	0.999232	0	-0.151217	0.590277	0	-0.188109	0.264948	0	0.00451648	0.996063	0	0.0362585	0.966957	0	0.031742	0.999957	0	0.205378	0.468569	0	0.0368916	0.928998	0	-0.168487	0.999975	0
A_33_P3306973	THC2494281	THC2494281				0.00238142	0.991631	0	0.0030386	0.989775	0	0.00299743	0.986428	0	-0.0584763	0.999232	0	0.128399	0.726165	0	0.0190729	0.948341	0	-0.000616001	0.999322	0	4.11751e-05	0.999994	0	0.000657176	0.999957	0	-0.0775491	0.842457	0	0.109327	0.795769	0	0.186876	0.999975	0
A_33_P3235690	NM_001081550	NM_001081550	57187	THO complex 2	THOC2	-0.0606172	0.665201	0	-0.0415731	0.795693	0	-0.250236	0.00343925	-1	-0.0697626	0.999232	0	-0.0801207	0.856001	0	-0.043691	0.858523	0	0.189619	0.685006	0	0.208663	0.827784	0	0.0190441	0.999957	0	-0.0260715	0.951775	0	-0.0364296	0.934729	0	-0.0103581	0.999975	0
A_21_P0004992	TCONS_00012054	TCONS_00012054				0.0315903	0.909117	0	0.0448052	0.882393	0	-0.131883	0.422226	0	0.0632099	0.999232	0	0.0271149	0.983534	0	-0.340244	0.255785	0	0.163473	0.828612	0	0.176688	0.876296	0	0.0132149	0.999957	0	0.403454	0.425003	0	0.367359	0.525336	0	-0.0360951	0.999975	0
A_33_P3858476	NR_033873	NR_033873	400955	long intergenic non-protein coding RNA 1122	LINC01122	-0.0548425	0.700455	0	-0.0540705	0.709366	0	-0.0203069	0.877184	0	-0.0426275	0.999232	0	-0.0359364	0.953853	0	-0.162016	0.390048	0	-0.0345356	0.963544	0	-0.0337636	0.968684	0	0.000772002	0.999957	0	0.119388	0.723178	0	0.126079	0.738373	0	0.00669104	0.999975	0
A_33_P3260373	NM_001204890	NM_001204890	100534599	ISY1-RAB43 readthrough	ISY1-RAB43	-0.0894345	0.523835	0	-0.0525097	0.749557	0	-0.0846204	0.427677	0	0.0211303	0.999232	0	-0.0215247	0.979788	0	0.0433611	0.871155	0	-0.00481405	0.996489	0	0.0321107	0.972293	0	0.0369247	0.999957	0	-0.0222308	0.964196	0	-0.0648857	0.887144	0	-0.042655	0.999975	0
A_33_P3282898	ENST00000378192	ENST00000378192				-0.0695982	0.638443	0	-0.134105	0.240174	0	-0.218592	0.0166352	-1	0.110221	0.999232	0	0.0400011	0.951496	0	0.0564579	0.823894	0	0.148994	0.742544	0	0.0844871	0.911115	0	-0.0645067	0.999957	0	0.0537629	0.901368	0	-0.0164568	0.975013	0	-0.0702197	0.999975	0
A_23_P122001	NM_002439	NM_002439	4437	mutS homolog 3	MSH3	-0.0090335	0.933605	0	-0.00311831	0.982677	0	-0.000551559	0.994802	0	-0.0540217	0.999232	0	-0.0479083	0.8665	0	0.0895955	0.45973	0	-0.00848194	0.986215	0	-0.00256675	0.998511	0	0.00591519	0.999957	0	-0.143617	0.444951	0	-0.137504	0.524561	0	0.00611342	0.999975	0
A_24_P303420	NR_026938	NR_026938	221442	adenylate cyclase 10, soluble pseudogene 1	ADCY10P1	-0.0308961	0.820942	0	-0.0641071	0.585276	0	-0.0959532	0.244205	0	-0.0458299	0.999232	0	-0.0568084	0.902679	0	0.0182322	0.940914	0	0.0650571	0.88368	0	0.0318462	0.968684	0	-0.0332109	0.999957	0	-0.0640621	0.847912	0	-0.0750405	0.841355	0	-0.0109784	0.999975	0
A_19_P00322002	NR_015431	NR_015431	378805	long intergenic non-protein coding RNA, p53 induced transcript	LINC-PINT	-0.114176	0.344618	0	-0.0124313	0.953334	0	-0.10496	0.26732	0	0.0998755	0.999232	0	0.113195	0.767109	0	0.100829	0.638019	0	-0.00921658	0.992497	0	0.0925282	0.891714	0	0.101745	0.999957	0	-0.000953781	0.998691	0	0.0123661	0.980385	0	0.0133199	0.999975	0
A_19_P00320028	NR_039981	NR_039981	100216546	long intergenic non-protein coding RNA 1004	LINC01004	0.024547	0.882249	0	-0.132104	0.225857	0	-0.11997	0.196839	0	0.0499718	0.999232	0	0.0944629	0.826165	0	-0.151663	0.447971	0	0.144517	0.739227	0	-0.012134	0.988895	0	-0.156651	0.999957	0	0.201635	0.526078	0	0.246126	0.489315	0	0.0444911	0.999975	0
A_24_P42066	NR_003267	NR_003267	2679	gamma-glutamyltransferase 3 pseudogene	GGT3P	-0.0620755	0.637287	0	-0.026975	0.874083	0	0.00226033	0.988562	0	-0.0953331	0.999232	0	-0.0823684	0.840359	0	-0.15337	0.396678	0	-0.0643358	0.895847	0	-0.0292353	0.971345	0	0.0351005	0.999957	0	0.0580366	0.875311	0	0.0710012	0.858946	0	0.0129646	0.999975	0
A_23_P114282	NM_014060	NM_014060	28985	MCTS1, re-initiation and release factor	MCTS1	0.279637	0.0117214	1	0.261834	0.0124337	1	0.22259	0.0191264	1	0.0448522	0.999232	0	0.0833351	0.8754	0	0.313286	0.0991832	0	0.0570466	0.934016	0	0.0392434	0.968684	0	-0.0178032	0.999957	0	-0.268434	0.426755	0	-0.229951	0.558129	0	0.0384828	0.999975	0
A_21_P0001847	ENST00000421904	ENST00000421904				0.0464551	0.940272	0	0.102696	0.870308	0	0.153753	0.704845	0	0.15092	0.999232	0	0.123874	0.955641	0	-0.880729	0.15243	0	-0.107298	0.970114	0	-0.0510574	0.987399	0	0.0562405	0.999957	0	1.03165	0.341199	0	1.0046	0.403742	0	-0.0270452	0.999975	0
A_33_P3325018	NM_015701	NM_015701	27248	endoplasmic reticulum lectin 1	ERLEC1	0.0844418	0.66591	0	0.117185	0.493368	0	0.131769	0.315462	0	-0.147402	0.999232	0	0.128887	0.822397	0	0.106391	0.729862	0	-0.0473269	0.964479	0	-0.0145836	0.990135	0	0.0327433	0.999957	0	-0.253794	0.557895	0	0.0224958	0.973568	0	0.27629	0.999975	0
A_33_P3412975	NM_175875	NM_175875	147912	SIX homeobox 5	SIX5	0.0705391	0.683076	0	-0.0397371	0.848194	0	0.0355748	0.811813	0	-0.0487037	0.999232	0	-0.199181	0.585822	0	-0.207107	0.368081	0	0.0349642	0.972602	0	-0.0753119	0.940665	0	-0.110276	0.999957	0	0.158404	0.697508	0	0.00792603	0.989026	0	-0.150478	0.999975	0
A_23_P102937	NM_006936	NM_006936	6612	small ubiquitin-like modifier 3	SUMO3	0.0158051	0.894482	0	0.0256529	0.833314	0	0.121583	0.0531192	0	0.0127166	0.999232	0	-0.0245288	0.957761	0	-0.00722515	0.971792	0	-0.105777	0.737285	0	-0.0959296	0.858639	0	0.00984788	0.999957	0	0.0199418	0.948459	0	-0.0173036	0.958698	0	-0.0372454	0.999975	0
A_24_P41021	NM_203301	NM_203301	254170	F-box protein 33	FBXO33	0.0659715	0.592317	0	0.016856	0.925721	0	0.0498148	0.616332	0	0.0117978	0.999232	0	0.127288	0.667366	0	0.0667563	0.744818	0	0.0161568	0.982645	0	-0.0329588	0.968415	0	-0.0491156	0.999957	0	-0.0549585	0.87766	0	0.0605318	0.876312	0	0.11549	0.999975	0
A_23_P11652	NM_003368	NM_003368	7398	ubiquitin specific peptidase 1	USP1	0.0714176	0.767376	0	0.138288	0.488159	0	0.204322	0.159016	0	-0.209811	0.999232	0	0.171654	0.781923	0	0.038331	0.931678	0	-0.132905	0.860803	0	-0.0660339	0.966283	0	0.0668708	0.999957	0	-0.248142	0.638471	0	0.133323	0.846287	0	0.381465	0.999975	0
A_23_P258340	NM_021130	NM_021130	5478	peptidylprolyl isomerase A	PPIA	0.116948	0.455656	0	0.150703	0.262907	0	0.225948	0.0343083	1	-0.0363527	0.999232	0	0.0242548	0.979788	0	0.468229	0.0273086	1	-0.109	0.84866	0	-0.0752446	0.942982	0	0.0337555	0.999957	0	-0.504581	0.219654	0	-0.443974	0.314424	0	0.0606075	0.999975	0
A_21_P0014949	NM_006310	NM_006310	9520	aminopeptidase puromycin sensitive	NPEPPS	-0.135824	0.117396	0	-0.157901	0.0476225	-1	-0.24065	0.000726244	-1	0.0111704	0.999232	0	-0.0157065	0.979935	0	-0.277337	0.0475062	-1	0.104826	0.761759	0	0.082749	0.881382	0	-0.022077	0.999957	0	0.288507	0.260422	0	0.261631	0.357468	0	-0.0268768	0.999975	0
A_33_P3209386	NM_032731	NM_032731	84817	thioredoxin domain containing 17	TXNDC17	0.0914155	0.364367	0	0.0413379	0.746436	0	0.0444092	0.630653	0	0.0146479	0.999232	0	-0.0188984	0.975552	0	-0.125844	0.439953	0	0.0470064	0.924416	0	-0.0030713	0.998731	0	-0.0500777	0.999957	0	0.140492	0.598997	0	0.106946	0.738381	0	-0.0335463	0.999975	0
A_23_P162702	NM_001109662	NM_001109662	283450	HECT domain E3 ubiquitin protein ligase 4	HECTD4	-0.155683	0.0630281	0	-0.197432	0.0101836	-1	-0.0252771	0.798772	0	-0.18774	0.999232	0	-0.186076	0.38275	0	-0.114943	0.474942	0	-0.130406	0.712348	0	-0.172155	0.827784	0	-0.041749	0.999957	0	-0.0727978	0.806043	0	-0.0711331	0.835995	0	0.00166467	0.999975	0
A_23_P434518	NM_001040168	NM_001040168	3955	LFNG O-fucosylpeptide 3-beta-N-acetylglucosaminyltransferase	LFNG	0.131568	0.630057	0	0.0673431	0.840202	0	-0.100606	0.646279	0	0.193533	0.999232	0	0.072171	0.953628	0	-0.436116	0.215909	0	0.232174	0.78023	0	0.167949	0.901489	0	-0.0642249	0.999957	0	0.629649	0.297351	0	0.508287	0.455156	0	-0.121362	0.999975	0
A_21_P0003091	TCONS_00006378	TCONS_00006378				-0.0464371	0.739026	0	-0.0907961	0.416719	0	-0.00132174	0.992477	0	-0.0772619	0.999232	0	-0.0974883	0.791393	0	-0.0212974	0.935631	0	-0.0451153	0.940178	0	-0.0894744	0.888161	0	-0.044359	0.999957	0	-0.0559645	0.880955	0	-0.0761908	0.849961	0	-0.0202264	0.999975	0
A_23_P61042	ENST00000390539	ENST00000390539				-0.262416	0.407997	0	-0.422537	0.103399	0	-0.387003	0.0858954	0	-0.512543	0.999232	0	-0.894607	0.101628	0	-0.46363	0.335007	0	0.124587	0.939131	0	-0.0355335	0.987989	0	-0.16012	0.999957	0	-0.0489134	0.967539	0	-0.430977	0.645101	0	-0.382064	0.999975	0
A_23_P119907	NM_018089	NM_018089	55139	ankyrin repeat and zinc finger domain containing 1	ANKZF1	-0.12524	0.205118	0	-0.110096	0.253484	0	-0.11038	0.168478	0	0.0194515	0.999232	0	-0.0291578	0.957947	0	0.14605	0.390184	0	-0.01486	0.982652	0	0.000284146	0.999851	0	0.0151441	0.999957	0	-0.126598	0.665844	0	-0.175208	0.581711	0	-0.0486093	0.999975	0
A_33_P3284404	NM_145731	NM_145731	9145	synaptogyrin 1	SYNGR1	0.0622592	0.683187	0	0.0425493	0.809014	0	-0.0229756	0.871644	0	0.208578	0.999232	0	0.0126621	0.989756	0	0.0104837	0.972309	0	0.0852348	0.87017	0	0.0655249	0.942929	0	-0.0197099	0.999957	0	0.198095	0.555106	0	0.00217845	0.996178	0	-0.195916	0.999975	0
A_32_P215938	NM_001145638	NM_001145638	26086	G protein signaling modulator 1	GPSM1	0.0368427	0.796718	0	-0.10252	0.332723	0	-0.0753824	0.417197	0	-0.00924134	0.999232	0	-0.0543999	0.915542	0	-0.0747557	0.717945	0	0.112225	0.777143	0	-0.0271371	0.972889	0	-0.139362	0.999957	0	0.0655144	0.853283	0	0.0203558	0.963492	0	-0.0451585	0.999975	0
A_23_P101960	NM_006887	NM_006887	678	ZFP36 ring finger protein like 2	ZFP36L2	-0.052107	0.665342	0	-0.174141	0.0347781	-1	-0.197942	0.00688997	-1	-0.00903285	0.999232	0	-0.156593	0.516193	0	-0.139841	0.390653	0	0.145835	0.708257	0	0.0238004	0.974101	0	-0.122034	0.999957	0	0.130809	0.638348	0	-0.016751	0.968091	0	-0.14756	0.999975	0
A_19_P00318261	NR_003016	NR_003016	677810	small nucleolar RNA, H/ACA box 26	SNORA26	-0.0120699	0.942994	0	0.104813	0.340241	0	0.00496517	0.972777	0	0.035574	0.999232	0	0.0897424	0.825428	0	0.1135	0.566022	0	-0.0170351	0.982652	0	0.099848	0.879381	0	0.116883	0.999957	0	-0.0779262	0.827229	0	-0.0237579	0.957982	0	0.0541684	0.999975	0
A_23_P140602	NM_001033088	NM_001033088	51335	neugrin, neurite outgrowth associated	NGRN	0.0351694	0.799376	0	0.0759396	0.497773	0	0.0988025	0.237006	0	0.0460477	0.999232	0	0.153381	0.56045	0	0.102052	0.581755	0	-0.0636331	0.888567	0	-0.0228629	0.978128	0	0.0407702	0.999957	0	-0.0560042	0.872868	0	0.0513287	0.896755	0	0.107333	0.999975	0
A_24_P252575	NM_012197	NM_012197	23637	RAB GTPase activating protein 1	RABGAP1	-0.0694327	0.554422	0	-0.154122	0.0781173	0	-0.0189289	0.871151	0	-0.0446014	0.999232	0	-0.104028	0.744854	0	-0.0251563	0.914881	0	-0.0505038	0.922701	0	-0.135193	0.84917	0	-0.0846895	0.999957	0	-0.0194451	0.960888	0	-0.0788718	0.83343	0	-0.0594267	0.999975	0
A_23_P104025	NM_052965	NM_052965	116461	tRNA splicing endonuclease subunit 15	TSEN15	0.0389635	0.761483	0	0.00813028	0.965388	0	0.136184	0.069736	0	-0.0249209	0.999232	0	0.0116291	0.987881	0	0.053454	0.788938	0	-0.0972202	0.792761	0	-0.128053	0.850149	0	-0.0308332	0.999957	0	-0.078375	0.80125	0	-0.0418249	0.911503	0	0.03655	0.999975	0
A_23_P63459	NM_001012985	NM_001012985	388753	cytochrome c oxidase assembly factor 6	COA6	0.202114	0.0273227	1	0.159886	0.0775188	0	0.120706	0.137191	0	0.0616424	0.999232	0	0.0470782	0.93091	0	0.132956	0.458069	0	0.0814084	0.84651	0	0.0391803	0.965882	0	-0.0422281	0.999957	0	-0.071314	0.831647	0	-0.0858782	0.822951	0	-0.0145642	0.999975	0
A_33_P3215028	NM_152734	NM_152734	221477	chromosome 6 open reading frame 89	C6orf89	-0.0738392	0.401333	0	-0.0744103	0.36789	0	-0.105426	0.0946457	0	0.0132074	0.999232	0	-0.143466	0.466407	0	-0.186299	0.134855	0	0.0315866	0.94799	0	0.0310155	0.965257	0	-0.000571101	0.999957	0	0.199506	0.362202	0	0.0428326	0.888674	0	-0.156673	0.999975	0
A_33_P3228722	ENST00000397466	ENST00000397466				-0.0609001	0.654482	0	0.0229124	0.900717	0	-0.059708	0.561062	0	-0.0396936	0.999232	0	-0.00582389	0.992801	0	0.0664278	0.763404	0	-0.00119215	0.998338	0	0.0826204	0.901489	0	0.0838126	0.999957	0	-0.106121	0.753289	0	-0.0722517	0.859738	0	0.0338697	0.999975	0
A_33_P3340085	NM_178136	NM_178136	84271	DNA polymerase delta interacting protein 3	POLDIP3	0.00787501	0.955316	0	-0.110627	0.186712	0	-0.12139	0.0816144	0	0.0243196	0.999232	0	-0.0650106	0.854151	0	0.0429936	0.821878	0	0.129265	0.712348	0	0.0107623	0.987989	0	-0.118502	0.999957	0	-0.018674	0.958322	0	-0.108004	0.720386	0	-0.0893301	0.999975	0
A_23_P215175	NM_005692	NM_005692	10061	ATP binding cassette subfamily F member 2	ABCF2	-0.16879	0.236729	0	-0.00643049	0.982608	0	-0.0576968	0.690069	0	-0.093135	0.999232	0	-0.137536	0.775568	0	-0.0241493	0.945684	0	-0.111093	0.849342	0	0.0512663	0.966283	0	0.162359	0.999957	0	-0.0689857	0.891428	0	-0.113387	0.832208	0	-0.044401	0.999975	0
A_23_P11032	NM_032591	NM_032591	84679	solute carrier family 9 member A7	SLC9A7	-0.0358507	0.812128	0	-0.0235721	0.899159	0	-0.119615	0.178204	0	0.0441027	0.999232	0	-0.0203175	0.979535	0	0.172429	0.350124	0	0.0837639	0.854709	0	0.0960425	0.885321	0	0.0122786	0.999957	0	-0.128326	0.697018	0	-0.192747	0.581711	0	-0.0644202	0.999975	0
A_23_P252748	NM_007152	NM_007152	7748	zinc finger protein 195	ZNF195	0.136613	0.151798	0	0.0723486	0.511474	0	0.12315	0.113128	0	-0.0643319	0.999232	0	0.0339165	0.949964	0	0.22584	0.139889	0	0.0134631	0.984188	0	-0.0508014	0.946046	0	-0.0642645	0.999957	0	-0.290172	0.290083	0	-0.191924	0.536861	0	0.0982485	0.999975	0
A_32_P57810	NM_052916	NM_052916	114804	ring finger protein 157	RNF157	0.018143	0.913977	0	0.0538678	0.712551	0	0.0632616	0.544145	0	-0.104579	0.999232	0	-0.0333819	0.957821	0	0.218554	0.218532	0	-0.0451186	0.946556	0	-0.00939381	0.991533	0	0.0357248	0.999957	0	-0.323133	0.291686	0	-0.251936	0.462727	0	0.071197	0.999975	0
A_21_P0002212	XR_245000	XR_245000	100506235	uncharacterized LOC100506235	LOC100506235	-0.00401924	0.977478	0	-0.0283764	0.825525	0	-0.0350368	0.692047	0	-0.0351403	0.999232	0	0.0311693	0.947295	0	-0.206228	0.120731	0	0.0310176	0.952773	0	0.00666034	0.993005	0	-0.0243572	0.999957	0	0.171088	0.466487	0	0.237398	0.371031	0	0.0663097	0.999975	0
A_23_P214678	NM_015921	NM_015921	51596	cutA divalent cation tolerance homolog	CUTA	0.167101	0.0881918	0	0.0805012	0.488051	0	0.0805848	0.379247	0	-0.0436955	0.999232	0	-0.117396	0.721602	0	0.129109	0.48801	0	0.0865157	0.84288	0	-8.36752e-05	0.999994	0	-0.0865994	0.999957	0	-0.172804	0.557895	0	-0.246505	0.446314	0	-0.073701	0.999975	0
A_33_P3240972	XM_005272554	XM_005272554				-0.152817	0.521363	0	0.139236	0.552876	0	-0.0716728	0.737398	0	0.130687	0.999232	0	0.0449277	0.973776	0	-0.208431	0.576625	0	-0.0811446	0.947298	0	0.210909	0.873679	0	0.292053	0.999957	0	0.339118	0.552244	0	0.253358	0.71205	0	-0.0857598	0.999975	0
A_23_P106463	NM_002537	NM_002537	4947	ornithine decarboxylase antizyme 2	OAZ2	-0.132165	0.255185	0	-0.149636	0.155751	0	0.0525533	0.642544	0	-0.0272759	0.999232	0	0.112207	0.771138	0	-0.0639068	0.78664	0	-0.184718	0.690317	0	-0.202189	0.827784	0	-0.0174707	0.999957	0	0.0366309	0.931974	0	0.176114	0.634485	0	0.139483	0.999975	0
A_24_P153043	NR_000029	NR_000029	118433	ribosomal protein L23a pseudogene 7	RPL23AP7	0.0822234	0.728443	0	0.259845	0.108833	0	0.0982836	0.564279	0	0.150794	0.999232	0	0.145601	0.830162	0	-0.000349013	0.999622	0	-0.0160602	0.99071	0	0.161561	0.881382	0	0.177622	0.999957	0	0.151143	0.792581	0	0.14595	0.829666	0	-0.00519355	0.999975	0
A_24_P149395	NM_015610	NM_015610	26100	WD repeat domain, phosphoinositide interacting 2	WIPI2	-0.155106	0.137386	0	-0.138019	0.172728	0	-0.110899	0.209824	0	-0.00337648	0.999232	0	0.0189366	0.979788	0	-0.15941	0.389762	0	-0.0442071	0.946556	0	-0.0271203	0.974101	0	0.0170868	0.999957	0	0.156033	0.618512	0	0.178347	0.608978	0	0.0223131	0.999975	0
A_21_P0012208	TCONS_l2_00017315	TCONS_l2_00017315				0.0737659	0.59816	0	0.0294755	0.873356	0	0.135581	0.138358	0	0.0883262	0.999232	0	0.048627	0.938073	0	0.19168	0.314549	0	-0.0618153	0.916568	0	-0.106106	0.879381	0	-0.0442904	0.999957	0	-0.103354	0.775433	0	-0.143053	0.711724	0	-0.0396992	0.999975	0
A_23_P104563	NM_001031847	NM_001031847	1374	carnitine palmitoyltransferase 1A	CPT1A	-0.197999	0.137676	0	-0.158363	0.232804	0	-0.366915	0.000703457	-1	-0.115516	0.999232	0	-0.246758	0.467473	0	-0.127522	0.62429	0	0.168916	0.748068	0	0.208552	0.835508	0	0.0396357	0.999957	0	0.0120061	0.983196	0	-0.119236	0.816328	0	-0.131242	0.999975	0
A_24_P336577	NM_019099	NM_019099	55924	family with sequence similarity 212 member B	FAM212B	-0.075598	0.647187	0	-0.291344	0.00891877	-1	-0.0648499	0.615476	0	-0.0587346	0.999232	0	0.0914662	0.867144	0	-0.168577	0.469131	0	-0.0107481	0.992487	0	-0.226494	0.828696	0	-0.215746	0.999957	0	0.109842	0.795746	0	0.260043	0.529223	0	0.150201	0.999975	0
A_33_P3317282	NM_138459	NM_138459	116150	NUS1 dehydrodolichyl diphosphate synthase subunit	NUS1	0.0885625	0.397472	0	0.0629825	0.574126	0	0.0022683	0.987349	0	-0.00721209	0.999232	0	-0.0447971	0.93001	0	0.125202	0.454662	0	0.0862942	0.823092	0	0.0607142	0.928903	0	-0.02558	0.999957	0	-0.132414	0.6351	0	-0.169999	0.578625	0	-0.037585	0.999975	0
A_33_P3384108	NM_194255	NM_194255	6573	solute carrier family 19 member 1	SLC19A1	-0.0929363	0.438963	0	-0.238789	0.00786812	-1	-0.251846	0.00230923	-1	-0.0229444	0.999232	0	-0.0726737	0.874212	0	-0.164668	0.361952	0	0.15891	0.708281	0	0.0130571	0.987989	0	-0.145852	0.999957	0	0.141723	0.65093	0	0.0919939	0.816091	0	-0.0497293	0.999975	0
A_33_P3236030	ENST00000509709	ENST00000509709				-0.105521	0.514725	0	-0.198701	0.1141	0	-0.112555	0.344872	0	0.0696953	0.999232	0	0.023155	0.980256	0	0.106557	0.69392	0	0.00703473	0.995969	0	-0.0861456	0.930787	0	-0.0931803	0.999957	0	-0.0368618	0.944168	0	-0.0834022	0.875862	0	-0.0465403	0.999975	0
A_33_P3273459	ENST00000466212	ENST00000466212				0.0201802	0.922789	0	0.00210939	0.99483	0	0.00786724	0.965948	0	0.116974	0.999232	0	-0.0875707	0.883166	0	-0.16498	0.488955	0	0.012313	0.989764	0	-0.00575785	0.997685	0	-0.0180708	0.999957	0	0.281954	0.441565	0	0.0774093	0.880806	0	-0.204545	0.999975	0
A_24_P383850	NM_003760	NM_003760	8672	eukaryotic translation initiation factor 4 gamma 3	EIF4G3	-0.111493	0.373913	0	-0.0957879	0.442969	0	-0.174256	0.0527358	0	0.0056528	0.999232	0	-0.0502238	0.937008	0	0.140017	0.49675	0	0.0627628	0.915712	0	0.0784681	0.91913	0	0.0157054	0.999957	0	-0.134365	0.699717	0	-0.190241	0.610744	0	-0.0558766	0.999975	0
A_23_P59153	NM_021177	NM_021177	57819	LSM2 homolog, U6 small nuclear RNA and mRNA degradation associated	LSM2	0.0723981	0.704814	0	0.170152	0.226295	0	0.0695983	0.632225	0	0.0691275	0.999232	0	0.0197437	0.98573	0	0.25433	0.293098	0	0.00279976	0.997941	0	0.100554	0.916893	0	0.0977538	0.999957	0	-0.185202	0.670089	0	-0.234586	0.623372	0	-0.0493838	0.999975	0
A_23_P103110	NM_012323	NM_012323	23764	MAF bZIP transcription factor F	MAFF	0.0342451	0.735452	0	0.0188898	0.879898	0	-0.0200801	0.812136	0	0.0457115	0.999232	0	0.051795	0.87528	0	0.109089	0.407823	0	0.0543252	0.871439	0	0.0389699	0.946046	0	-0.0153553	0.999957	0	-0.0633772	0.79739	0	-0.0572937	0.843041	0	0.00608342	0.999975	0
A_23_P344853	NM_015131	NM_015131	23160	WD repeat domain 43	WDR43	-0.0273798	0.882051	0	0.213006	0.0573739	0	0.052043	0.690218	0	0.0383633	0.999232	0	0.150424	0.697303	0	0.188986	0.384715	0	-0.0794229	0.890729	0	0.160963	0.850492	0	0.240386	0.999957	0	-0.150623	0.691807	0	-0.0385621	0.939948	0	0.112061	0.999975	0
A_24_P134235	NM_003685	NM_003685	8570	KH-type splicing regulatory protein	KHSRP	-0.00717712	0.969599	0	0.0996792	0.418398	0	-0.123473	0.189865	0	0.0602754	0.999232	0	-0.108229	0.787588	0	0.0154258	0.958432	0	0.116296	0.794264	0	0.223152	0.827784	0	0.106856	0.999957	0	0.0448497	0.918144	0	-0.123655	0.76066	0	-0.168505	0.999975	0
A_33_P3218772	NM_080599	NM_080599	26019	UPF2, regulator of nonsense mediated mRNA decay	UPF2	-0.0863003	0.455122	0	-0.0743587	0.514557	0	-0.0410116	0.694314	0	-0.0181509	0.999232	0	0.0308908	0.957761	0	-0.0614334	0.7672	0	-0.0452887	0.936028	0	-0.0333471	0.968415	0	0.0119416	0.999957	0	0.0432825	0.908012	0	0.0923242	0.804074	0	0.0490418	0.999975	0
A_23_P53646	NM_139207	NM_139207	4673	nucleosome assembly protein 1 like 1	NAP1L1	0.108178	0.583976	0	0.120573	0.510464	0	0.257618	0.0421446	1	-0.179032	0.999232	0	0.256728	0.545531	0	0.158968	0.601682	0	-0.14944	0.823092	0	-0.137045	0.889758	0	0.0123952	0.999957	0	-0.338	0.448351	0	0.0977593	0.876234	0	0.43576	0.999975	0
A_23_P103442	NM_022756	NM_022756	64769	MYST/Esa1 associated factor 6	MEAF6	0.00136457	0.994037	0	0.0148686	0.927294	0	0.0727979	0.353052	0	0.00266173	0.999232	0	0.138603	0.559585	0	0.144124	0.34475	0	-0.0714333	0.849706	0	-0.0579293	0.928903	0	0.013504	0.999957	0	-0.141462	0.584696	0	-0.00552068	0.98872	0	0.135941	0.999975	0
A_21_P0011627	TCONS_l2_00011589	TCONS_l2_00011589				0.12118	0.255593	0	-0.0102986	0.959341	0	0.0255502	0.827615	0	-0.0264275	0.999232	0	-0.081522	0.840226	0	0.0177146	0.946285	0	0.0956294	0.823081	0	-0.0358488	0.966988	0	-0.131478	0.999957	0	-0.0441421	0.908441	0	-0.0992366	0.792571	0	-0.0550945	0.999975	0
A_21_P0008647	NR_026979	NR_026979	145837	downregulated RNA in cancer, inhibitor of cell invasion and migration	DRAIC	0.152841	0.659519	0	0.0317085	0.95057	0	-0.0399078	0.903233	0	0.0655075	0.999232	0	-0.00589186	0.997252	0	-0.402701	0.392125	0	0.192749	0.872398	0	0.0716163	0.972889	0	-0.121133	0.999957	0	0.468209	0.541148	0	0.396809	0.65955	0	-0.0713994	0.999975	0
A_33_P3230976	NM_002726	NM_002726	5550	prolyl endopeptidase	PREP	-0.0842989	0.369135	0	-0.0119815	0.939272	0	-0.0344272	0.700678	0	-0.0268945	0.999232	0	0.00407766	0.993518	0	0.0799789	0.62429	0	-0.0498717	0.906432	0	0.0224457	0.97291	0	0.0723174	0.999957	0	-0.106873	0.677804	0	-0.0759012	0.813119	0	0.0309722	0.999975	0
A_23_P106675	NM_002661	NM_002661	5336	phospholipase C gamma 2	PLCG2	-0.256804	0.0100567	-1	-0.354423	9.43071e-05	-1	-0.273853	0.00136419	-1	-0.147073	0.999232	0	-0.160601	0.590277	0	-0.125372	0.528961	0	0.0170484	0.982652	0	-0.0805708	0.908064	0	-0.0976192	0.999957	0	-0.0217013	0.960902	0	-0.0352294	0.936608	0	-0.0135281	0.999975	0
A_32_P231086	NM_198181	NM_198181	440295	golgin A6 family-like 9	GOLGA6L9	0.135003	0.326286	0	0.132793	0.304444	0	0.173048	0.0900544	0	0.127275	0.999232	0	0.183897	0.605531	0	0.166877	0.467334	0	-0.0380443	0.966092	0	-0.040255	0.968684	0	-0.00221071	0.999957	0	-0.0396021	0.9349	0	0.0170198	0.977172	0	0.0566219	0.999975	0
A_23_P7535	NM_022304	NM_022304	3274	histamine receptor H2	HRH2	-0.0422601	0.815209	0	-0.0862646	0.578682	0	-0.0128043	0.94049	0	0.087608	0.999232	0	-0.0211642	0.981273	0	-0.0803899	0.765261	0	-0.0294558	0.977229	0	-0.0734603	0.93993	0	-0.0440045	0.999957	0	0.167998	0.66613	0	0.0592257	0.908325	0	-0.108772	0.999975	0
A_32_P60606	ENST00000391437	ENST00000391437				-0.118256	0.439045	0	-0.141446	0.291381	0	-0.036549	0.804967	0	-0.059328	0.999232	0	-0.129008	0.781923	0	0.142207	0.566513	0	-0.0817068	0.89802	0	-0.104897	0.900547	0	-0.0231899	0.999957	0	-0.201535	0.604106	0	-0.271216	0.52392	0	-0.0696804	0.999975	0
A_23_P31073	NM_005375	NM_005375	4602	MYB proto-oncogene, transcription factor	MYB	-0.0505624	0.804059	0	-0.0610645	0.769245	0	0.0648995	0.663016	0	-0.259755	0.999232	0	-0.0519766	0.949246	0	-0.0822301	0.788969	0	-0.115462	0.850536	0	-0.125964	0.888161	0	-0.0105021	0.999957	0	-0.177525	0.688543	0	0.0302535	0.961436	0	0.207778	0.999975	0
A_32_P85591	NR_003238	NR_003238	767811	H2B histone family member X, pseudogene	H2BFXP	-0.00576619	0.983047	0	0.152611	0.349527	0	0.0622558	0.705711	0	0.0145541	0.999232	0	0.0588743	0.946773	0	-0.0875872	0.791222	0	-0.068022	0.941203	0	0.0903555	0.938537	0	0.158378	0.999957	0	0.102141	0.849971	0	0.146461	0.802233	0	0.0443202	0.999975	0
A_23_P345710	NM_152531	NM_152531	152002	xyloside xylosyltransferase 1	XXYLT1	-0.152934	0.317017	0	0.135069	0.366925	0	-0.0662987	0.647553	0	-0.0131201	0.999232	0	-0.0509376	0.949246	0	0.10988	0.699179	0	-0.0866355	0.899558	0	0.201367	0.84917	0	0.288003	0.999957	0	-0.123	0.79162	0	-0.160817	0.749213	0	-0.0378174	0.999975	0
A_23_P110961	NM_016098	NM_016098	51660	mitochondrial pyruvate carrier 1	MPC1	0.0649235	0.623154	0	0.0356225	0.822939	0	0.132885	0.116572	0	-0.0474619	0.999232	0	0.000101278	0.999604	0	0.0430973	0.854764	0	-0.0679618	0.887644	0	-0.0972628	0.881382	0	-0.029301	0.999957	0	-0.0905593	0.791413	0	-0.0429961	0.920129	0	0.0475632	0.999975	0
A_23_P166122	NM_006466	NM_006466	10621	RNA polymerase III subunit F	POLR3F	-0.0701573	0.632466	0	-0.00320423	0.989451	0	0.133223	0.159452	0	-0.0377507	0.999232	0	-0.00581443	0.993322	0	-0.0282773	0.920593	0	-0.203381	0.685006	0	-0.136428	0.862577	0	0.0669531	0.999957	0	-0.00947339	0.984356	0	0.0224629	0.964519	0	0.0319362	0.999975	0
A_23_P113803	NM_007044	NM_007044	11104	katanin catalytic subunit A1	KATNA1	0.0271307	0.827192	0	0.0113929	0.945135	0	0.0693318	0.373722	0	-0.0453592	0.999232	0	-0.0264679	0.957942	0	0.07238	0.678193	0	-0.0422011	0.933075	0	-0.0579389	0.927556	0	-0.0157378	0.999957	0	-0.117739	0.6553	0	-0.0988479	0.750562	0	0.0188913	0.999975	0
A_33_P3237364	THC2701256	THC2701256				-0.0657595	0.674943	0	-0.00552353	0.982923	0	-0.090497	0.407753	0	0.0200068	0.999232	0	-0.147751	0.694005	0	-0.24211	0.221713	0	0.0247375	0.979737	0	0.0849734	0.914937	0	0.060236	0.999957	0	0.262116	0.436297	0	0.0943584	0.839727	0	-0.167758	0.999975	0
A_23_P123727	NM_024617	NM_024617	79670	zinc finger CCHC-type containing 6	ZCCHC6	-0.065894	0.649265	0	-0.0161923	0.938453	0	-0.00219923	0.989404	0	-0.0180797	0.999232	0	0.109454	0.783316	0	0.0307121	0.910917	0	-0.0636948	0.91157	0	-0.0139931	0.987989	0	0.0497017	0.999957	0	-0.0487918	0.908888	0	0.0787418	0.858344	0	0.127534	0.999975	0
A_23_P213518	NM_001042440	NM_001042440	831	calpastatin	CAST	-0.0208814	0.899568	0	0.0393085	0.811356	0	0.0799934	0.421224	0	-0.129729	0.999232	0	0.0138946	0.986991	0	-0.0669443	0.770287	0	-0.100875	0.823374	0	-0.0406849	0.966283	0	0.06019	0.999957	0	-0.0627849	0.870413	0	0.0808389	0.850012	0	0.143624	0.999975	0
A_23_P112113	NM_014846	NM_014846	9897	WASH complex subunit 5	WASHC5	-0.0748978	0.529454	0	-0.0983524	0.340241	0	0.0406902	0.697655	0	-0.125305	0.999232	0	-0.152337	0.569019	0	-0.0139175	0.957635	0	-0.115588	0.764486	0	-0.139043	0.84917	0	-0.0234546	0.999957	0	-0.111388	0.71928	0	-0.13842	0.681478	0	-0.027032	0.999975	0
A_33_P3291776	NM_018946	NM_018946	54187	N-acetylneuraminate synthase	NANS	0.0443126	0.640323	0	-0.0608933	0.461942	0	-0.0219601	0.789544	0	0.0553425	0.999232	0	-0.0930192	0.681755	0	0.00239013	0.991608	0	0.0662727	0.832887	0	-0.0389332	0.946046	0	-0.105206	0.999957	0	0.0529524	0.832403	0	-0.0954093	0.707733	0	-0.148362	0.999975	0
A_33_P3222744	NM_015852	NM_015852	51351	zinc finger protein 117	ZNF117	-0.0520877	0.807664	0	0.189542	0.198849	0	0.0354492	0.843014	0	-0.00691697	0.999232	0	0.178127	0.716896	0	0.177948	0.528709	0	-0.0875369	0.911065	0	0.154093	0.875009	0	0.24163	0.999957	0	-0.184865	0.691964	0	0.000178533	0.999653	0	0.185043	0.999975	0
A_23_P362228	NR_033690	NR_033690	148898	ZNF436 antisense RNA 1	ZNF436-AS1	0.0747889	0.545914	0	-0.0030396	0.988443	0	0.0269722	0.816099	0	0.0404495	0.999232	0	0.0563771	0.910492	0	0.0655258	0.758856	0	0.0478166	0.934794	0	-0.0300118	0.969487	0	-0.0778285	0.999957	0	-0.0250764	0.95052	0	-0.00914875	0.984652	0	0.0159276	0.999975	0
A_23_P108376	NM_022065	NM_022065	63892	THADA, armadillo repeat containing	THADA	-0.0816761	0.496141	0	-0.0672886	0.581753	0	-0.0625813	0.513541	0	-0.00995542	0.999232	0	-0.0801098	0.842044	0	0.0289811	0.905811	0	-0.0190948	0.980425	0	-0.00470732	0.997422	0	0.0143875	0.999957	0	-0.0389365	0.919704	0	-0.109091	0.763252	0	-0.0701544	0.999975	0
A_23_P59388	NM_001723	NM_001723	667	dystonin	DST	0.0223125	0.951616	0	0.0522823	0.892714	0	0.0786528	0.748233	0	0.0604496	0.999232	0	0.106734	0.930953	0	-0.292491	0.476155	0	-0.0563403	0.974948	0	-0.0263705	0.987989	0	0.0299698	0.999957	0	0.352941	0.593911	0	0.399225	0.59298	0	0.0462844	0.999975	0
A_23_P109774	NM_014415	NM_014415	27107	zinc finger and BTB domain containing 11	ZBTB11	0.0351184	0.897955	0	0.136885	0.506443	0	0.261173	0.0693132	0	-0.200858	0.999232	0	0.229059	0.672558	0	0.0686103	0.867522	0	-0.226055	0.748068	0	-0.124288	0.920241	0	0.101767	0.999957	0	-0.269468	0.610977	0	0.160449	0.813973	0	0.429917	0.999975	0
A_23_P99891	NM_022566	NM_022566	59274	talin rod domain containing 1	TLNRD1	-0.105691	0.326064	0	-0.00114897	0.996462	0	0.00829351	0.950238	0	0.0162828	0.999232	0	0.0329231	0.953853	0	-0.125043	0.488149	0	-0.113984	0.769585	0	-0.00944248	0.99025	0	0.104542	0.999957	0	0.141325	0.634929	0	0.157966	0.633833	0	0.0166403	0.999975	0
A_23_P430670	NM_024533	NM_024533	23563	carbohydrate sulfotransferase 5	CHST5	0.0677113	0.762718	0	0.0553422	0.825665	0	0.00442842	0.98609	0	0.0642098	0.999232	0	0.052557	0.955733	0	-0.166904	0.592121	0	0.0632829	0.951471	0	0.0509138	0.968684	0	-0.012369	0.999957	0	0.231114	0.638348	0	0.219461	0.693861	0	-0.0116528	0.999975	0
A_23_P41948	NM_017785	NM_017785	54908	spindle apparatus coiled-coil protein 1	SPDL1	0.0303494	0.768492	0	0.0155827	0.906431	0	0.0544756	0.427774	0	0.0213261	0.999232	0	-0.0770112	0.767109	0	0.0760292	0.594789	0	-0.0241262	0.96365	0	-0.0388929	0.946162	0	-0.0147667	0.999957	0	-0.0547031	0.829144	0	-0.15304	0.52579	0	-0.0983373	0.999975	0
A_23_P27724	NM_003009	NM_003009	6415	selenoprotein W	SELENOW	0.202512	0.0341167	1	0.109802	0.291787	0	0.1139	0.182856	0	-0.00856442	0.999232	0	0.0558421	0.912602	0	0.184006	0.286887	0	0.0886114	0.841236	0	-0.00409838	0.998447	0	-0.0927098	0.999957	0	-0.192571	0.507732	0	-0.128164	0.719565	0	0.0644065	0.999975	0
A_23_P10785	NM_145206	NM_145206	143187	vesicle transport through interaction with t-SNAREs 1A	VTI1A	-0.0209224	0.867848	0	-0.0339334	0.78666	0	-0.1733	0.0101225	-1	0.0913067	0.999232	0	-0.0832846	0.781923	0	-0.00483451	0.984165	0	0.152377	0.685006	0	0.139366	0.835508	0	-0.013011	0.999957	0	0.0961413	0.719185	0	-0.07845	0.808452	0	-0.174591	0.999975	0
A_23_P107587	NM_000271	NM_000271	4864	NPC intracellular cholesterol transporter 1	NPC1	-0.142418	0.094969	0	-0.113514	0.183838	0	-0.0666541	0.407355	0	-0.089422	0.999232	0	-0.0798267	0.80591	0	-0.000205533	0.9994	0	-0.0757635	0.841781	0	-0.0468599	0.946046	0	0.0289037	0.999957	0	-0.0892165	0.753645	0	-0.0796211	0.813119	0	0.00959532	0.999975	0
A_23_P160849	NM_004106	NM_004106	2207	Fc fragment of IgE receptor Ig	FCER1G	0.0487235	0.828435	0	0.0661335	0.772806	0	0.0120247	0.95462	0	0.0413103	0.999232	0	-0.0713606	0.934782	0	-0.12107	0.703123	0	0.0366988	0.976928	0	0.0541088	0.968008	0	0.01741	0.999957	0	0.16238	0.747534	0	0.0497093	0.939356	0	-0.112671	0.999975	0
A_24_P823684	NM_007355	NM_007355	3326	heat shock protein 90 alpha family class B member 1	HSP90AB1	-0.171134	0.155833	0	-0.0512492	0.768497	0	-0.374737	0.000163059	-1	0.0431188	0.999232	0	-0.177286	0.600239	0	-0.218961	0.280724	0	0.203603	0.690317	0	0.323488	0.827784	0	0.119885	0.999957	0	0.262079	0.438189	0	0.0416745	0.933729	0	-0.220405	0.999975	0
A_23_P43079	NM_017864	NM_017864	55656	integrator complex subunit 8	INTS8	-0.021163	0.892259	0	-0.0559519	0.681651	0	-0.0114999	0.932516	0	0.0224773	0.999232	0	-0.0160665	0.982846	0	-0.0227946	0.931227	0	-0.00966306	0.990119	0	-0.044452	0.960658	0	-0.0347889	0.999957	0	0.0452719	0.908321	0	0.0067281	0.988214	0	-0.0385438	0.999975	0
A_23_P217659	NM_001018055	NM_001018055	79184	BRCA1/BRCA2-containing complex subunit 3	BRCC3	-0.00779613	0.970613	0	-0.0177118	0.940113	0	0.0727502	0.554105	0	-0.194484	0.999232	0	0.0447445	0.949964	0	-0.00593311	0.987875	0	-0.0805463	0.892952	0	-0.090462	0.913562	0	-0.00991567	0.999957	0	-0.188551	0.614967	0	0.0506776	0.921818	0	0.239228	0.999975	0
A_33_P3404749	NM_001277313	NM_001277313	342184	formin 1	FMN1	-0.051825	0.74208	0	0.0474755	0.777836	0	-0.0104323	0.946059	0	-0.0272929	0.999232	0	-0.138289	0.706554	0	-0.296797	0.105065	0	-0.0413926	0.957049	0	0.0579079	0.950059	0	0.0993005	0.999957	0	0.269504	0.406536	0	0.158508	0.687323	0	-0.110996	0.999975	0
A_23_P137543	NM_152493	NM_152493	149076	zinc finger protein 362	ZNF362	-0.0400525	0.739933	0	-0.10621	0.220719	0	-0.0272949	0.781288	0	-0.178309	0.999232	0	-0.174936	0.430175	0	-0.0953514	0.566513	0	-0.0127575	0.983835	0	-0.078915	0.886591	0	-0.0661575	0.999957	0	-0.0829575	0.772873	0	-0.0795849	0.813119	0	0.00337257	0.999975	0
A_21_P0001876	ENST00000415138	ENST00000415138				-0.0304588	0.820448	0	-0.129732	0.150995	0	0.0540992	0.56001	0	-0.0691107	0.999232	0	0.0541547	0.906148	0	-0.0577126	0.774292	0	-0.084558	0.835535	0	-0.183831	0.827784	0	-0.0992735	0.999957	0	-0.0113981	0.976531	0	0.111867	0.73841	0	0.123265	0.999975	0
A_33_P3270599	NM_213674	NM_213674	7169	tropomyosin 2	TPM2	-0.0355209	0.833838	0	-0.0595683	0.711272	0	-0.209925	0.025749	-1	-0.00544288	0.999232	0	-0.0382745	0.955641	0	-0.235784	0.229553	0	0.174404	0.712348	0	0.150357	0.850492	0	-0.0240474	0.999957	0	0.230342	0.493359	0	0.19751	0.619477	0	-0.0328317	0.999975	0
A_33_P3330911	NM_003657	NM_003657	8537	breast carcinoma amplified sequence 1	BCAS1	0.0329684	0.817028	0	0.104399	0.315964	0	-0.0464272	0.655371	0	0.0356951	0.999232	0	0.17248	0.512151	0	-0.155835	0.378295	0	0.0793956	0.854709	0	0.150826	0.83957	0	0.0714303	0.999957	0	0.19153	0.503524	0	0.328315	0.321624	0	0.136785	0.999975	0
A_21_P0011326	XR_243175	XR_243175				0.139517	0.657863	0	0.0240187	0.960473	0	0.0385224	0.896778	0	0.0141513	0.999232	0	0.161451	0.884085	0	-0.376059	0.376976	0	0.100995	0.946556	0	-0.0145037	0.995698	0	-0.115498	0.999957	0	0.390211	0.582762	0	0.537511	0.491706	0	0.1473	0.999975	0
A_23_P40952	NM_002880	NM_002880	5894	Raf-1 proto-oncogene, serine/threonine kinase	RAF1	-0.260302	0.0595306	0	-0.189404	0.17902	0	-0.0713101	0.6314	0	-0.0981795	0.999232	0	0.0282306	0.979174	0	0.196694	0.455974	0	-0.188991	0.742544	0	-0.118094	0.899229	0	0.0708975	0.999957	0	-0.294874	0.473693	0	-0.168463	0.745299	0	0.12641	0.999975	0
A_19_P00808883	THC2653958	THC2653958				0.123257	0.57345	0	-0.00367063	0.99267	0	-0.112456	0.502586	0	-0.238375	0.999232	0	0.183015	0.765227	0	0.130863	0.716319	0	0.235713	0.738659	0	0.108785	0.935553	0	-0.126928	0.999957	0	-0.369238	0.457723	0	0.0521515	0.943657	0	0.421389	0.999975	0
A_23_P45166	NM_007198	NM_007198	11212	pyridoxal phosphate binding protein	PLPBP	0.0395462	0.715337	0	-0.00656944	0.968462	0	0.0381898	0.644073	0	-0.0497271	0.999232	0	-0.12465	0.569019	0	0.0435453	0.801293	0	0.00135637	0.997941	0	-0.0447593	0.943293	0	-0.0461157	0.999957	0	-0.0932725	0.71108	0	-0.168195	0.518258	0	-0.0749224	0.999975	0
A_21_P0013807	ENST00000422914	ENST00000422914				0.149497	0.617976	0	0.0263263	0.9543	0	0.0205676	0.948155	0	0.0778414	0.999232	0	0.0872534	0.948574	0	-0.163361	0.738621	0	0.12893	0.91882	0	0.00575869	0.999185	0	-0.123171	0.999957	0	0.241202	0.750137	0	0.250614	0.770536	0	0.00941198	0.999975	0
A_21_P0003212	ENST00000570130	ENST00000570130				-0.0283893	0.855767	0	0.102629	0.366617	0	0.0593976	0.572688	0	0.0197896	0.999232	0	0.0908499	0.826951	0	-0.0470009	0.844365	0	-0.0877869	0.847296	0	0.0432318	0.963454	0	0.131019	0.999957	0	0.0667905	0.858331	0	0.137851	0.710323	0	0.0710603	0.999975	0
A_23_P334608	NM_000181	NM_000181	2990	glucuronidase beta	GUSB	-0.0866042	0.410754	0	-0.138654	0.107275	0	-0.193811	0.00835163	-1	-0.0638377	0.999232	0	-0.17605	0.444405	0	-0.16175	0.304609	0	0.107207	0.768573	0	0.0551571	0.936341	0	-0.0520494	0.999957	0	0.0979121	0.739773	0	-0.0142998	0.972775	0	-0.112212	0.999975	0
A_23_P53137	NM_000559	NM_000559	3047	hemoglobin subunit gamma 1	HBG1	0.4704	0.148009	0	-0.146019	0.751806	0	0.358739	0.188442	0	0.162887	0.999232	0	0.0971897	0.958874	0	-0.233027	0.727798	0	0.111661	0.959929	0	-0.504758	0.835508	0	-0.616419	0.999957	0	0.395914	0.693422	0	0.330217	0.783594	0	-0.0656969	0.999975	0
A_24_P166094	NM_001025595	NM_001025595	27236	ADP ribosylation factor interacting protein 1	ARFIP1	-0.0508829	0.825044	0	-0.0248255	0.933496	0	0.13305	0.354567	0	-0.241494	0.999232	0	0.153667	0.79381	0	0.0746745	0.835772	0	-0.183933	0.77115	0	-0.157875	0.876296	0	0.0260574	0.999957	0	-0.316168	0.492264	0	0.0789921	0.903028	0	0.39516	0.999975	0
A_21_P0009821	NR_046224	NR_046224	100652730	long intergenic non-protein coding RNA 659	LINC00659	0.209206	0.538099	0	-0.0371073	0.943809	0	0.212595	0.402488	0	0.270782	0.999232	0	0.216463	0.848541	0	-0.51704	0.270972	0	-0.00338875	0.998237	0	-0.249702	0.886591	0	-0.246313	0.999957	0	0.787822	0.316967	0	0.733503	0.405277	0	-0.054319	0.999975	0
A_21_P0008126	TCONS_00021922	TCONS_00021922				0.157467	0.323739	0	-0.0359501	0.884989	0	0.0342715	0.84314	0	0.0398728	0.999232	0	0.126962	0.820179	0	-0.0473886	0.893888	0	0.123195	0.843511	0	-0.0702216	0.952279	0	-0.193417	0.999957	0	0.0872614	0.867122	0	0.174351	0.735786	0	0.0870897	0.999975	0
A_23_P593	NM_021639	NM_021639	60313	GC-rich promoter binding protein 1 like 1	GPBP1L1	-0.0884606	0.529963	0	-0.0608878	0.696645	0	0.023365	0.869562	0	-0.150205	0.999232	0	0.0234861	0.977025	0	-0.140197	0.516232	0	-0.111826	0.816853	0	-0.0842528	0.913414	0	0.0275728	0.999957	0	-0.0100077	0.98384	0	0.163684	0.681567	0	0.173691	0.999975	0
A_33_P3272189	NM_032718	NM_032718	84804	major facilitator superfamily domain containing 9	MFSD9	0.010221	0.951521	0	0.00121123	0.996462	0	-0.0445135	0.680109	0	-0.00798351	0.999232	0	-0.0958147	0.797423	0	-0.0526347	0.814831	0	0.0547345	0.922701	0	0.0457247	0.958198	0	-0.00900978	0.999957	0	0.0446512	0.908996	0	-0.04318	0.919243	0	-0.0878312	0.999975	0
A_23_P112652	NM_015442	NM_015442	25904	CCR4-NOT transcription complex subunit 10	CNOT10	0.00691285	0.941744	0	0.00445629	0.970635	0	-0.0649435	0.187794	0	0.01204	0.999232	0	-0.0457275	0.848248	0	-0.0755594	0.481383	0	0.0718564	0.75339	0	0.0693998	0.864148	0	-0.00245656	0.999957	0	0.0875994	0.617614	0	0.0298319	0.90025	0	-0.0577674	0.999975	0
A_21_P0000477	NR_003709	NR_003709	100124539	small nucleolar RNA, H/ACA box 11B	SNORA11B	-0.0427256	0.856564	0	-0.135917	0.45175	0	-0.307057	0.0166352	-1	0.117699	0.999232	0	-0.123476	0.850123	0	-0.178055	0.557493	0	0.264332	0.699214	0	0.171141	0.873679	0	-0.0931913	0.999957	0	0.295754	0.5237	0	0.0545789	0.935121	0	-0.241175	0.999975	0
A_23_P13907	NM_000618	NM_000618	3479	insulin like growth factor 1	IGF1	-0.0153734	0.941744	0	0.0479246	0.809014	0	0.00567231	0.97501	0	-0.041213	0.999232	0	-0.0506984	0.945127	0	-0.0615206	0.832559	0	-0.0210457	0.982652	0	0.0422523	0.968684	0	0.063298	0.999957	0	0.0203076	0.969355	0	0.0108222	0.984907	0	-0.00948546	0.999975	0
A_33_P3226080	NM_207103	NM_207103	388325	SLP adaptor and CSK interacting membrane protein	SCIMP	0.0891027	0.519228	0	0.185665	0.0760947	0	-0.00432476	0.9785	0	0.173043	0.999232	0	-0.0646304	0.908727	0	0.248626	0.183138	0	0.0934275	0.848235	0	0.189989	0.835508	0	0.0965618	0.999957	0	-0.0755829	0.849448	0	-0.313256	0.388374	0	-0.237673	0.999975	0
A_23_P105392	NM_006431	NM_006431	10576	chaperonin containing TCP1 subunit 2	CCT2	0.200193	0.176691	0	0.236157	0.0772952	0	0.308715	0.00784407	1	-0.0780243	0.999232	0	0.150291	0.767109	0	0.400359	0.0846489	0	-0.108522	0.866939	0	-0.0725582	0.950443	0	0.0359638	0.999957	0	-0.478383	0.260422	0	-0.250068	0.605737	0	0.228315	0.999975	0
A_33_P3338166	NM_030952	NM_030952	81788	NUAK family kinase 2	NUAK2	-0.223801	0.0183581	-1	-0.249851	0.00480679	-1	-0.213398	0.00893574	-1	-0.169546	0.999232	0	-0.141811	0.636441	0	-0.28105	0.0861147	0	-0.0104035	0.989415	0	-0.0364534	0.966988	0	-0.0260499	0.999957	0	0.111504	0.732748	0	0.139239	0.692279	0	0.0277353	0.999975	0
A_23_P118392	NM_016084	NM_016084	51655	ras related dexamethasone induced 1	RASD1	-0.0088489	0.952278	0	-0.154629	0.0625403	0	-0.0840109	0.288094	0	0.00930587	0.999232	0	-0.0583615	0.891281	0	-0.272131	0.059056	0	0.075162	0.84651	0	-0.0706179	0.90418	0	-0.14578	0.999957	0	0.281437	0.283042	0	0.213769	0.462727	0	-0.0676674	0.999975	0
A_23_P77401	NM_018340	NM_018340	55313	calcineurin like phosphoesterase domain containing 1	CPPED1	-0.280045	0.0263293	-1	-0.256715	0.0353936	-1	-0.0640175	0.648134	0	-0.146012	0.999232	0	0.0764977	0.910379	0	-0.109125	0.689977	0	-0.216027	0.708257	0	-0.192697	0.84917	0	0.0233299	0.999957	0	-0.0368872	0.944664	0	0.185623	0.690509	0	0.22251	0.999975	0
A_19_P00319765	ENST00000469178	ENST00000469178				0.196806	0.270756	0	0.153181	0.402471	0	0.0692789	0.698859	0	0.06344	0.999232	0	0.183473	0.744854	0	0.147732	0.655552	0	0.127527	0.860827	0	0.0839019	0.950443	0	-0.043625	0.999957	0	-0.084292	0.892658	0	0.0357415	0.960927	0	0.120033	0.999975	0
A_32_P12639	NM_002816	NM_002816	5718	proteasome 26S subunit, non-ATPase 12	PSMD12	-0.0224214	0.839084	0	-0.0358193	0.737819	0	0.0563664	0.423986	0	-0.0374054	0.999232	0	-0.0917727	0.709489	0	0.0105949	0.958266	0	-0.0787878	0.795169	0	-0.0921857	0.861575	0	-0.0133979	0.999957	0	-0.0480003	0.857952	0	-0.102368	0.697563	0	-0.0543674	0.999975	0
A_24_P268160	NM_178454	NM_178454	128338	DNA damage regulated autophagy modulator 2	DRAM2	0.0604741	0.757236	0	0.154286	0.285867	0	0.182039	0.11733	0	-0.0201287	0.999232	0	0.114675	0.840226	0	0.169761	0.520648	0	-0.121565	0.84288	0	-0.0277533	0.981347	0	0.0938116	0.999957	0	-0.189889	0.661203	0	-0.0550861	0.924212	0	0.134803	0.999975	0
A_33_P3230588	DB321672	DB321672				-0.0258341	0.872487	0	-0.0384296	0.818282	0	-0.0229537	0.861032	0	0.0365732	0.999232	0	0.0501342	0.933997	0	0.165757	0.389063	0	-0.00288043	0.99767	0	-0.0154759	0.986079	0	-0.0125955	0.999957	0	-0.129184	0.702747	0	-0.115623	0.770714	0	0.013561	0.999975	0
A_21_P0012967	ENST00000412295	ENST00000412295				-0.199336	0.286334	0	0.090326	0.701755	0	-0.0942611	0.586348	0	0.160058	0.999232	0	0.0671413	0.946367	0	0.0378198	0.932809	0	-0.105074	0.904648	0	0.184587	0.87402	0	0.289661	0.999957	0	0.122238	0.838716	0	0.0293214	0.970298	0	-0.0929163	0.999975	0
A_21_P0004981	TCONS_00012034	TCONS_00012034				-0.00219678	0.992846	0	0.0172297	0.938498	0	0.000198882	0.998738	0	0.0478196	0.999232	0	0.0772983	0.889528	0	0.127112	0.572041	0	-0.00239566	0.997941	0	0.0170308	0.986079	0	0.0194265	0.999957	0	-0.0792925	0.848121	0	-0.0498138	0.919612	0	0.0294787	0.999975	0
A_23_P106056	NM_001344	NM_001344	1603	defender against cell death 1	DAD1	0.14613	0.0537625	0	0.0714665	0.417366	0	0.138372	0.0307238	1	0.0235056	0.999232	0	0.0104916	0.986816	0	0.117638	0.410008	0	0.00775795	0.989441	0	-0.0669058	0.894286	0	-0.0746637	0.999957	0	-0.094132	0.707848	0	-0.107146	0.697626	0	-0.013014	0.999975	0
A_23_P111487	NM_001128853	NM_001128853	51593	serrate, RNA effector molecule	SRRT	-0.0851244	0.320911	0	-0.0887627	0.264415	0	-0.102272	0.111739	0	-0.0223691	0.999232	0	-0.140857	0.488036	0	0.0696472	0.65327	0	0.0171474	0.978986	0	0.0135091	0.982814	0	-0.00363826	0.999957	0	-0.0920162	0.709233	0	-0.210504	0.398768	0	-0.118488	0.999975	0
A_33_P3367106	NR_003242	NR_003242	767846	profilin 1 pseudogene 2	PFN1P2	0.0792722	0.673747	0	0.141139	0.352711	0	0.105557	0.424674	0	0.02217	0.999232	0	-0.0463486	0.955733	0	-0.0334968	0.926112	0	-0.0262848	0.981404	0	0.0355819	0.975416	0	0.0618667	0.999957	0	0.0556668	0.919746	0	-0.0128518	0.984713	0	-0.0685186	0.999975	0
A_21_P0010868	TCONS_l2_00003528	TCONS_l2_00003528				0.093752	0.80044	0	0.0202471	0.969808	0	0.0448128	0.890188	0	0.00200936	0.999388	0	0.0582875	0.974101	0	-0.459627	0.302457	0	0.0489393	0.980829	0	-0.0245657	0.990748	0	-0.0735049	0.999957	0	0.461636	0.539917	0	0.517915	0.546295	0	0.0562781	0.999975	0
A_33_P3366575	NM_018698	NM_018698	55916	nuclear transport factor 2 like export factor 2	NXT2	0.0735867	0.591921	0	0.0495815	0.749477	0	0.148445	0.0950941	0	0.0312951	0.999232	0	0.047921	0.938073	0	0.128648	0.528955	0	-0.0748581	0.882686	0	-0.0988634	0.885651	0	-0.0240053	0.999957	0	-0.0973525	0.788142	0	-0.0807266	0.851753	0	0.0166259	0.999975	0
A_21_P0013341	ENST00000464543	ENST00000464543				0.000902325	0.996991	0	-0.0310091	0.841783	0	-0.00944472	0.94275	0	0.0677128	0.999232	0	0.16853	0.516193	0	-0.140675	0.428454	0	0.010347	0.989415	0	-0.0215643	0.97976	0	-0.0319114	0.999957	0	0.208387	0.455237	0	0.309205	0.333538	0	0.100817	0.999975	0
A_33_P3239102	A_33_P3239102	A_33_P3239102				-0.0367206	0.892968	0	0.164051	0.401224	0	-0.130016	0.433192	0	0.28519	0.999232	0	0.262622	0.605531	0	-0.314754	0.305248	0	0.0932951	0.924416	0	0.294067	0.835508	0	0.200771	0.999957	0	0.599944	0.257963	0	0.577376	0.326704	0	-0.022568	0.999975	0
A_21_P0010355	ENST00000452505	ENST00000452505				0.00979326	0.977133	0	0.0880512	0.757395	0	-0.032172	0.896101	0	-0.0473541	0.999232	0	0.0294236	0.984086	0	-0.173829	0.658368	0	0.0419652	0.979452	0	0.120223	0.936034	0	0.078258	0.999957	0	0.126475	0.855476	0	0.203253	0.782339	0	0.0767777	0.999975	0
A_24_P388528	NM_173216	NM_173216	6480	ST6 beta-galactoside alpha-2,6-sialyltransferase 1	ST6GAL1	-0.186812	0.16314	0	-0.216037	0.0759322	0	-0.0300995	0.848653	0	-0.254133	0.999232	0	-0.107358	0.840226	0	-0.111272	0.675506	0	-0.156713	0.763116	0	-0.185937	0.849447	0	-0.0292244	0.999957	0	-0.142861	0.735705	0	0.00391333	0.994475	0	0.146774	0.999975	0
A_21_P0003137	NM_001190470	NM_001190470	100462981	MT-RNR2 like 2	MTRNR2L2	0.106785	0.590056	0	0.0316655	0.910817	0	0.00483524	0.983742	0	0.0372272	0.999232	0	0.036801	0.972812	0	0.13955	0.654103	0	0.10195	0.890884	0	0.0268303	0.982814	0	-0.0751195	0.999957	0	-0.102323	0.853283	0	-0.102749	0.869175	0	-0.000426123	0.999975	0
A_33_P3349774	NM_144703	NM_144703	149986	LSM family member 14B	LSM14B	-0.0152619	0.927053	0	-0.0885229	0.444397	0	-0.0172621	0.893538	0	-0.0418194	0.999232	0	0.102808	0.780973	0	-0.00489818	0.987875	0	0.00200013	0.997941	0	-0.0712608	0.923924	0	-0.073261	0.999957	0	-0.0369212	0.926825	0	0.107706	0.778321	0	0.144627	0.999975	0
A_23_P158829	NM_004313	NM_004313	409	arrestin beta 2	ARRB2	-0.125212	0.335499	0	-0.108183	0.400997	0	-0.0709627	0.536725	0	-0.0676697	0.999232	0	-0.00237114	0.997341	0	0.14917	0.492428	0	-0.0542497	0.936028	0	-0.0372202	0.968684	0	0.0170295	0.999957	0	-0.21684	0.524708	0	-0.151541	0.713882	0	0.0652985	0.999975	0
A_33_P3409553	A_33_P3409553	A_33_P3409553				0.222751	0.171293	0	0.264106	0.072148	0	0.0795618	0.626806	0	0.124446	0.999232	0	0.177906	0.740154	0	0.224415	0.437701	0	0.14319	0.83593	0	0.184545	0.866115	0	0.0413552	0.999957	0	-0.0999689	0.858768	0	-0.046509	0.945218	0	0.0534599	0.999975	0
A_23_P398275	NR_027001	NR_027001	388152	golgin A2 pseudogene 7	GOLGA2P7	0.109572	0.315131	0	0.060518	0.637169	0	-0.0897242	0.307454	0	0.0989149	0.999232	0	0.0340189	0.953853	0	0.18202	0.284392	0	0.199296	0.685006	0	0.150242	0.83957	0	-0.0490535	0.999957	0	-0.083105	0.805949	0	-0.148001	0.664511	0	-0.0648959	0.999975	0
A_33_P3225327	NM_024524	NM_024524	79572	ATPase 13A3	ATP13A3	-0.0258343	0.84499	0	0.0162269	0.923424	0	0.00779629	0.949313	0	-0.0830547	0.999232	0	-0.0386373	0.938995	0	-0.0329934	0.876505	0	-0.0336306	0.953819	0	0.00843063	0.990876	0	0.0420612	0.999957	0	-0.0500612	0.880955	0	-0.00564388	0.988857	0	0.0444173	0.999975	0
A_23_P430411	XM_005261115	XM_005261115				-0.418254	0.00312651	-1	-0.207698	0.152016	0	-0.317048	0.00868054	-1	-0.271919	0.999232	0	-0.15502	0.771138	0	-0.222979	0.408426	0	-0.101206	0.885101	0	0.10935	0.913414	0	0.210556	0.999957	0	-0.0489401	0.933762	0	0.0679594	0.911749	0	0.116899	0.999975	0
A_23_P136413	NM_016155	NM_016155	4326	matrix metallopeptidase 17	MMP17	-0.0509375	0.872877	0	0.268374	0.201422	0	-0.120736	0.568752	0	-0.0470239	0.999232	0	-0.139928	0.889079	0	-0.0741789	0.884102	0	0.0697984	0.963291	0	0.38911	0.827784	0	0.319311	0.999957	0	0.0271551	0.97585	0	-0.0657491	0.941646	0	-0.0929041	0.999975	0
A_23_P111132	NM_005345	NM_005345	3303	heat shock protein family A (Hsp70) member 1A	HSPA1A	-0.452102	0.00202339	-1	-0.472006	0.000259924	-1	-0.456904	0.000227376	-1	-0.1796	0.999232	0	-0.291693	0.441887	0	-0.402529	0.0969118	0	0.00480165	0.997239	0	-0.0151019	0.989791	0	-0.0199035	0.999957	0	0.22293	0.625718	0	0.110836	0.853741	0	-0.112093	0.999975	0
A_32_P157213	A_32_P157213	A_32_P157213				-0.0100298	0.959662	0	-0.0029647	0.990701	0	-0.042674	0.747397	0	0.019807	0.999232	0	-0.0074953	0.992262	0	-0.0874699	0.726469	0	0.0326442	0.972602	0	0.0397093	0.968684	0	0.00706513	0.999957	0	0.107277	0.789536	0	0.0799746	0.867387	0	-0.0273023	0.999975	0
A_33_P3227934	AK126997	AK126997				0.0657502	0.759075	0	0.112596	0.53983	0	0.0318795	0.866554	0	0.0505499	0.999232	0	-0.013904	0.990878	0	-0.115314	0.716531	0	0.0338707	0.978986	0	0.0807166	0.946666	0	0.0468459	0.999957	0	0.165863	0.738159	0	0.10141	0.868487	0	-0.0644539	0.999975	0
A_23_P9362	NM_002799	NM_002799	5695	proteasome subunit beta 7	PSMB7	0.105881	0.184551	0	0.130505	0.06722	0	0.0716072	0.292448	0	-0.0296597	0.999232	0	-0.0511931	0.887621	0	0.232066	0.0606173	0	0.0342738	0.94197	0	0.0588981	0.908064	0	0.0246242	0.999957	0	-0.261726	0.257017	0	-0.283259	0.284868	0	-0.0215334	0.999975	0
A_21_P0009319	ENST00000582919	ENST00000582919				0.249334	0.700385	0	0.0271491	0.979623	0	0.310244	0.500836	0	0.218604	0.999232	0	0.171873	0.950254	0	-1.48496	0.0531758	0	-0.0609098	0.986322	0	-0.283095	0.938537	0	-0.222185	0.999957	0	1.70357	0.248244	0	1.65684	0.309727	0	-0.0467309	0.999975	0
A_23_P88249	NM_001077351	NM_001077351	55147	RNA binding motif protein 23	RBM23	-0.320132	0.0229073	-1	-0.141287	0.389901	0	-0.109283	0.437562	0	0.0207094	0.999232	0	-0.120968	0.843267	0	0.0999241	0.754377	0	-0.210849	0.726468	0	-0.0320044	0.98042	0	0.178845	0.999957	0	-0.0792147	0.887849	0	-0.220893	0.670128	0	-0.141678	0.999975	0
A_33_P3274851	NM_001862	NM_001862	1329	cytochrome c oxidase subunit 5B	COX5B	0.237118	0.0172342	1	0.126376	0.238137	0	0.111781	0.221844	0	0.0650528	0.999232	0	-0.0525675	0.929423	0	0.146208	0.45371	0	0.125336	0.768277	0	0.0145949	0.987122	0	-0.110741	0.999957	0	-0.0811548	0.825607	0	-0.198775	0.577423	0	-0.11762	0.999975	0
A_23_P103631	NM_006824	NM_006824	10969	EBNA1 binding protein 2	EBNA1BP2	0.11149	0.187925	0	0.0368097	0.755496	0	0.109643	0.103789	0	0.0132286	0.999232	0	-0.136265	0.534545	0	0.103226	0.497895	0	0.00184672	0.997941	0	-0.0728331	0.888161	0	-0.0746798	0.999957	0	-0.0899974	0.731996	0	-0.239491	0.366919	0	-0.149493	0.999975	0
A_33_P3233565	NM_000375	NM_000375	7390	uroporphyrinogen III synthase	UROS	-0.0690289	0.555962	0	0.0398274	0.774037	0	0.0604173	0.505161	0	0.0453112	0.999232	0	0.190231	0.422494	0	0.181046	0.255785	0	-0.129446	0.733679	0	-0.0205899	0.97976	0	0.108856	0.999957	0	-0.135734	0.636149	0	0.0091851	0.983322	0	0.14492	0.999975	0
A_23_P115366	NM_016308	NM_016308	51727	cytidine/uridine monophosphate kinase 1	CMPK1	-0.0283634	0.903418	0	0.0671848	0.757557	0	0.180587	0.151272	0	-0.11583	0.999232	0	0.202236	0.653063	0	0.164144	0.567168	0	-0.208951	0.728836	0	-0.113403	0.909574	0	0.0955482	0.999957	0	-0.279974	0.521151	0	0.0380917	0.952986	0	0.318066	0.999975	0
A_23_P49338	NM_016639	NM_016639	51330	TNF receptor superfamily member 12A	TNFRSF12A	0.0253013	0.90474	0	-0.0188908	0.941667	0	0.0409521	0.789384	0	-0.00315425	0.999232	0	0.0349035	0.969662	0	0.320128	0.146623	0	-0.0156508	0.987981	0	-0.0598429	0.959865	0	-0.0441921	0.999957	0	-0.323282	0.403902	0	-0.285225	0.519178	0	0.0380577	0.999975	0
A_23_P118690	NM_001032293	NM_001032293	7756	zinc finger protein 207	ZNF207	-0.149136	0.144004	0	-0.0870495	0.444801	0	-0.00311404	0.983773	0	-0.103694	0.999232	0	-0.121875	0.712377	0	0.0344783	0.887744	0	-0.146022	0.716682	0	-0.0839354	0.896869	0	0.0620869	0.999957	0	-0.138172	0.656389	0	-0.156353	0.648088	0	-0.0181813	0.999975	0
A_33_P3252043	NM_000918	NM_000918	5034	prolyl 4-hydroxylase subunit beta	P4HB	-0.1193	0.13968	0	-0.130759	0.0790767	0	-0.159279	0.013417	-1	-0.118819	0.999232	0	-0.293068	0.066046	0	-0.0753755	0.633734	0	0.0399785	0.930754	0	0.0285201	0.966988	0	-0.0114584	0.999957	0	-0.0434436	0.885006	0	-0.217692	0.397329	0	-0.174249	0.999975	0
A_23_P163161	NM_020195	NM_020195	56948	short chain dehydrogenase/reductase family 39U member 1	SDR39U1	0.00957316	0.957862	0	0.0494226	0.756025	0	0.0674506	0.531308	0	-0.0904002	0.999232	0	-0.0446254	0.943877	0	0.187883	0.327837	0	-0.0578775	0.924416	0	-0.018028	0.982814	0	0.0398494	0.999957	0	-0.278283	0.374737	0	-0.232509	0.519138	0	0.0457748	0.999975	0
A_23_P120414	NM_003404	NM_003404	7529	tyrosine 3-monooxygenase/tryptophan 5-monooxygenase activation protein beta	YWHAB	-0.171095	0.0352908	-1	-0.214749	0.00393183	-1	-0.153879	0.0260493	-1	-0.147688	0.999232	0	-0.146162	0.522695	0	-0.239534	0.0829908	0	-0.0172163	0.979833	0	-0.0608698	0.918989	0	-0.0436535	0.999957	0	0.0918454	0.740151	0	0.0933713	0.766622	0	0.00152587	0.999975	0
A_33_P3332126	ENST00000409736	ENST00000409736				-0.0892263	0.436933	0	0.0898031	0.404142	0	-0.0350852	0.744432	0	0.0315795	0.999232	0	-0.0629369	0.891617	0	-0.0456246	0.836124	0	-0.0541411	0.91882	0	0.124888	0.851076	0	0.179029	0.999957	0	0.0772041	0.819441	0	-0.0173123	0.969169	0	-0.0945164	0.999975	0
A_23_P104054	NM_016227	NM_016227	51430	SUN domain containing ossification factor	SUCO	-0.00149416	0.997274	0	0.116217	0.632061	0	0.25407	0.102215	0	-0.227633	0.999232	0	0.261296	0.639611	0	0.143428	0.711413	0	-0.255564	0.738659	0	-0.137853	0.913414	0	0.117711	0.999957	0	-0.371061	0.495159	0	0.117868	0.876251	0	0.488929	0.999975	0
A_23_P11279	NM_018466	NM_018466	79868	ALG13, UDP-N-acetylglucosaminyltransferase subunit	ALG13	0.112008	0.306376	0	0.144305	0.131848	0	0.0394566	0.71499	0	0.00586219	0.999232	0	-0.0114406	0.989295	0	0.197429	0.242981	0	0.0725514	0.875303	0	0.104849	0.874631	0	0.0322973	0.999957	0	-0.191567	0.506119	0	-0.20887	0.524124	0	-0.0173028	0.999975	0
A_21_P0000197	NM_021064	NM_021064	8969	histone cluster 1 H2A family member g	HIST1H2AG	0.125865	0.448026	0	0.0678346	0.728601	0	0.00965778	0.961073	0	0.10839	0.999232	0	-0.139165	0.781923	0	0.0461193	0.89316	0	0.116207	0.848075	0	0.0581768	0.962591	0	-0.0580301	0.999957	0	0.0622704	0.908321	0	-0.185284	0.705268	0	-0.247554	0.999975	0
A_23_P168229	NM_030810	NM_030810	81567	thioredoxin domain containing 5	TXNDC5	-0.0892008	0.742275	0	-0.185937	0.382543	0	-0.0977578	0.628306	0	-0.525335	0.999232	0	-0.533085	0.184255	0	-0.0488234	0.920776	0	0.00855705	0.996161	0	-0.088179	0.958198	0	-0.0967361	0.999957	0	-0.476512	0.394294	0	-0.484262	0.443359	0	-0.00775026	0.999975	0
A_24_P343095	NM_000791	NM_000791	1719	dihydrofolate reductase	DHFR	0.148333	0.205384	0	0.094625	0.460446	0	-0.0480124	0.691261	0	0.0523998	0.999232	0	0.028909	0.969662	0	-0.116679	0.592935	0	0.196345	0.685006	0	0.142637	0.854092	0	-0.0537077	0.999957	0	0.169079	0.619531	0	0.145588	0.71405	0	-0.0234907	0.999975	0
A_24_P302695	NM_145212	NM_145212	51263	mitochondrial ribosomal protein L30	MRPL30	0.240558	0.0162083	1	0.221101	0.0210972	1	0.208235	0.0158011	1	0.0154876	0.999232	0	0.254135	0.301259	0	0.338274	0.0487474	1	0.0323229	0.967553	0	0.0128663	0.987989	0	-0.0194566	0.999957	0	-0.322787	0.294603	0	-0.0841391	0.842525	0	0.238648	0.999975	0
A_33_P3344991	ENST00000586554	ENST00000586554				0.0290462	0.898316	0	0.101603	0.570327	0	-0.0475452	0.773219	0	0.0727838	0.999232	0	0.0747388	0.92392	0	-0.157928	0.572125	0	0.0765914	0.924416	0	0.149148	0.87537	0	0.0725568	0.999957	0	0.230712	0.598037	0	0.232667	0.640663	0	0.00195509	0.999975	0
A_23_P93623	NM_004231	NM_004231	9296	ATPase H+ transporting V1 subunit F	ATP6V1F	0.188647	0.0273227	1	0.0979743	0.299953	0	0.129031	0.0829588	0	0.0410418	0.999232	0	-0.0645595	0.875068	0	0.311983	0.0338042	1	0.0596157	0.890389	0	-0.0310567	0.968415	0	-0.0906724	0.999957	0	-0.270941	0.300947	0	-0.376542	0.253908	0	-0.105601	0.999975	0
A_23_P118435	NM_006937	NM_006937	6613	small ubiquitin-like modifier 2	SUMO2	0.172876	0.0906708	0	0.125765	0.230302	0	0.143568	0.0954208	0	0.0322659	0.999232	0	0.0288612	0.965778	0	0.314789	0.0606173	0	0.0293082	0.971455	0	-0.0178025	0.982814	0	-0.0471107	0.999957	0	-0.282523	0.34721	0	-0.285928	0.396347	0	-0.00340477	0.999975	0
A_24_P117029	NM_000527	NM_000527	3949	low density lipoprotein receptor	LDLR	-0.0526591	0.741756	0	-0.0589984	0.709705	0	-0.120703	0.222009	0	-0.0968648	0.999232	0	-0.0739499	0.89208	0	-0.0959177	0.681851	0	0.0680442	0.908975	0	0.0617049	0.946046	0	-0.00633922	0.999957	0	-0.000947115	0.998691	0	0.0219678	0.965801	0	0.0229149	0.999975	0
A_23_P361940	NM_003874	NM_003874	8832	CD84 molecule	CD84	-0.0505539	0.704145	0	-0.0869665	0.426075	0	0.0153674	0.899301	0	-0.046086	0.999232	0	-0.00661489	0.991567	0	0.187354	0.260751	0	-0.0659213	0.885648	0	-0.102334	0.874631	0	-0.0364126	0.999957	0	-0.23344	0.405682	0	-0.193969	0.549301	0	0.0394711	0.999975	0
A_23_P108922	ENST00000396049	ENST00000396049				0.0779675	0.517058	0	0.0799048	0.479814	0	0.0591342	0.541208	0	0.0484937	0.999232	0	0.139164	0.628062	0	0.103236	0.586373	0	0.0188333	0.980829	0	0.0207706	0.980706	0	0.00193732	0.999957	0	-0.0547426	0.880955	0	0.0359282	0.93067	0	0.0906708	0.999975	0
A_23_P107073	NM_002945	NM_002945	6117	replication protein A1	RPA1	-0.0901026	0.367412	0	-0.166007	0.0388669	-1	0.00517056	0.967514	0	-0.218645	0.999232	0	-0.254069	0.17915	0	-0.258095	0.0692569	0	-0.0952732	0.787891	0	-0.171178	0.827784	0	-0.0759049	0.999957	0	0.0394495	0.908012	0	0.00402519	0.992143	0	-0.0354243	0.999975	0
A_23_P138680	NM_172200	NM_172200	3601	interleukin 15 receptor subunit alpha	IL15RA	-0.0298869	0.869238	0	0.0809819	0.588006	0	0.00584074	0.97263	0	-0.0538608	0.999232	0	-0.0701264	0.905894	0	0.139763	0.54226	0	-0.0357277	0.968258	0	0.0751412	0.935587	0	0.110869	0.999957	0	-0.193624	0.590314	0	-0.20989	0.605712	0	-0.0162657	0.999975	0
A_19_P00317872	ENST00000521122	ENST00000521122				-0.0282437	0.824089	0	-0.00953496	0.956837	0	-0.018268	0.866554	0	-0.019386	0.999232	0	-0.0444989	0.925306	0	0.0229302	0.916858	0	-0.00997567	0.988112	0	0.00873303	0.990018	0	0.0187087	0.999957	0	-0.0423163	0.900189	0	-0.0674291	0.847889	0	-0.0251128	0.999975	0
A_23_P52058	NM_005646	NM_005646	6894	TAR (HIV-1) RNA binding protein 1	TARBP1	0.054101	0.72177	0	0.0628219	0.666712	0	0.101254	0.298714	0	-0.0203075	0.999232	0	0.103634	0.798539	0	0.121634	0.564151	0	-0.0471525	0.946556	0	-0.0384316	0.968008	0	0.00872095	0.999957	0	-0.141942	0.678833	0	-0.0179998	0.971637	0	0.123942	0.999975	0
A_23_P115036	NM_014652	NM_014652	9670	importin 13	IPO13	-0.101976	0.571842	0	0.0360811	0.883659	0	-0.109343	0.411774	0	0.105908	0.999232	0	0.0376292	0.968344	0	0.12349	0.670389	0	0.00736687	0.995972	0	0.145424	0.87537	0	0.138057	0.999957	0	-0.0175816	0.976528	0	-0.0858603	0.881777	0	-0.0682788	0.999975	0
A_19_P00800006	THC2523617	THC2523617				0.112785	0.624309	0	0.215035	0.226951	0	0.225957	0.126054	0	-0.119177	0.999232	0	0.253866	0.624257	0	0.575227	0.0443287	1	-0.113172	0.897164	0	-0.0109212	0.995698	0	0.10225	0.999957	0	-0.694405	0.211432	0	-0.321362	0.59052	0	0.373043	0.999975	0
A_21_P0008531	TCONS_00023094	TCONS_00023094				0.0968211	0.809157	0	0.0880301	0.842828	0	0.135223	0.642714	0	0.228574	0.999232	0	0.0173108	0.992262	0	-0.474547	0.33154	0	-0.0384016	0.984482	0	-0.0471925	0.982814	0	-0.00879098	0.999957	0	0.703121	0.377545	0	0.491858	0.6	0	-0.211263	0.999975	0
A_21_P0011031	ENST00000513207	ENST00000513207				-0.0919522	0.481979	0	-0.0122959	0.9543	0	-0.148623	0.096971	0	0.143656	0.999232	0	0.0105238	0.989907	0	0.0732243	0.749971	0	0.0566711	0.924966	0	0.136327	0.858576	0	0.0796563	0.999957	0	0.0704318	0.85418	0	-0.0627005	0.885802	0	-0.133132	0.999975	0
A_23_P94819	NM_006987	NM_006987	9501	rabphilin 3A like (without C2 domains)	RPH3AL	-0.00531371	0.974322	0	-0.0377908	0.796977	0	-0.116769	0.149052	0	0.087909	0.999232	0	-0.146225	0.594397	0	-0.077737	0.693817	0	0.111455	0.77115	0	0.0789779	0.899229	0	-0.0324771	0.999957	0	0.165646	0.558985	0	-0.0684879	0.858583	0	-0.234134	0.999975	0
A_33_P3360555	NM_001253792	NM_001253792	55311	zinc finger protein 444	ZNF444	0.126529	0.235954	0	-0.0640949	0.617547	0	-0.0430652	0.691142	0	-0.0306333	0.999232	0	-0.122614	0.708613	0	-0.0647802	0.763607	0	0.169595	0.695292	0	-0.0210297	0.980712	0	-0.190624	0.999957	0	0.0341469	0.931671	0	-0.0578342	0.886184	0	-0.0919811	0.999975	0
A_23_P500799	NM_001226	NM_001226	839	caspase 6	CASP6	0.0731264	0.513405	0	-0.00102305	0.996509	0	0.131968	0.0778777	0	0.0755363	0.999232	0	0.0970023	0.76175	0	0.0871224	0.629632	0	-0.0588414	0.893957	0	-0.132991	0.84917	0	-0.0741494	0.999957	0	-0.0115862	0.975975	0	0.00987986	0.981367	0	0.021466	0.999975	0
A_33_P3404546	NM_001271223	NM_001271223	84033	obscurin, cytoskeletal calmodulin and titin-interacting RhoGEF	OBSCN	-0.130757	0.312135	0	0.0082757	0.973894	0	-0.105623	0.312376	0	-0.0454517	0.999232	0	-0.0983692	0.834664	0	-0.110936	0.633619	0	-0.025134	0.979452	0	0.113899	0.878725	0	0.139033	0.999957	0	0.0654845	0.880955	0	0.012567	0.981567	0	-0.0529175	0.999975	0
A_23_P82523	NM_000927	NM_000927	5243	ATP binding cassette subfamily B member 1	ABCB1	-0.111953	0.0641046	0	-0.0222502	0.819646	0	-0.022106	0.750196	0	-0.0901461	0.999232	0	-0.0164745	0.968164	0	0.0177072	0.909933	0	-0.0898468	0.719429	0	-0.000144166	0.999851	0	0.0897026	0.999957	0	-0.107853	0.55804	0	-0.0341817	0.892653	0	0.0736717	0.999975	0
A_21_P0000536	NM_147128	NM_147128	223082	zinc and ring finger 2	ZNRF2	-0.00781178	0.9705	0	0.111675	0.414195	0	-0.124215	0.246444	0	0.00360088	0.999232	0	0.0183602	0.984199	0	-0.0518353	0.855482	0	0.116403	0.82356	0	0.23589	0.827784	0	0.119486	0.999957	0	0.0554362	0.907804	0	0.0701955	0.886549	0	0.0147594	0.999975	0
A_23_P500130	NM_153186	NM_153186	23189	KN motif and ankyrin repeat domains 1	KANK1	-0.0538394	0.75934	0	-0.132274	0.316854	0	0.0189635	0.904163	0	-0.114944	0.999232	0	-0.145359	0.726165	0	-0.274533	0.189273	0	-0.0728029	0.91157	0	-0.151237	0.864148	0	-0.0784346	0.999957	0	0.159589	0.684535	0	0.129174	0.784111	0	-0.0304152	0.999975	0
A_23_P216017	NM_004901	NM_004901	9583	ectonucleoside triphosphate diphosphohydrolase 4	ENTPD4	-0.0532705	0.722693	0	-0.089077	0.477461	0	-0.0207992	0.878559	0	0.0556832	0.999232	0	0.0476994	0.938495	0	0.189618	0.316756	0	-0.0324712	0.968258	0	-0.0682778	0.935432	0	-0.0358066	0.999957	0	-0.133935	0.695214	0	-0.141918	0.712138	0	-0.00798388	0.999975	0
A_33_P3395369	NM_001634	NM_001634	262	adenosylmethionine decarboxylase 1	AMD1	-0.0159099	0.940237	0	-0.129698	0.342078	0	-0.0399569	0.783009	0	0.0228642	0.999232	0	-0.06106	0.932745	0	0.200601	0.381268	0	0.024047	0.980829	0	-0.089741	0.92188	0	-0.113788	0.999957	0	-0.177737	0.652668	0	-0.261661	0.537807	0	-0.0839242	0.999975	0
A_24_P62615	NM_006367	NM_006367	10487	cyclase associated actin cytoskeleton regulatory protein 1	CAP1	-0.239541	0.0645572	0	-0.191135	0.139712	0	0.0187042	0.913227	0	-0.229474	0.999232	0	-0.189575	0.630983	0	0.189993	0.439402	0	-0.258245	0.685006	0	-0.20984	0.835903	0	0.0484058	0.999957	0	-0.419467	0.28602	0	-0.379568	0.380253	0	0.0398984	0.999975	0
A_32_P72341	NM_173084	NM_173084	286827	tripartite motif containing 59	TRIM59	-0.0123687	0.946991	0	0.0205251	0.923424	0	0.108686	0.27552	0	0.0467955	0.999232	0	0.0577867	0.924494	0	0.0701193	0.774422	0	-0.121055	0.791081	0	-0.0881611	0.907548	0	0.0328938	0.999957	0	-0.0233238	0.961339	0	-0.0123326	0.981367	0	0.0109912	0.999975	0
A_23_P309701	NM_002828	NM_002828	5771	protein tyrosine phosphatase, non-receptor type 2	PTPN2	-0.046763	0.769591	0	0.0127489	0.954526	0	-0.0353914	0.78342	0	0.108844	0.999232	0	0.0858335	0.85775	0	0.245833	0.195414	0	-0.0113716	0.989415	0	0.0481403	0.961505	0	0.0595119	0.999957	0	-0.136989	0.702677	0	-0.16	0.685162	0	-0.0230106	0.999975	0
A_33_P3271990	NM_012079	NM_012079	8694	diacylglycerol O-acyltransferase 1	DGAT1	-0.0327157	0.844919	0	-0.121179	0.306452	0	-0.0778517	0.472018	0	0.0710495	0.999232	0	0.0494891	0.938495	0	-0.186235	0.352996	0	0.045136	0.95075	0	-0.0433272	0.966283	0	-0.0884632	0.999957	0	0.257284	0.430241	0	0.235724	0.528173	0	-0.0215604	0.999975	0
A_23_P100203	NM_001537	NM_001537	3281	heat shock factor binding protein 1	HSBP1	0.0368628	0.710938	0	0.0805501	0.28444	0	0.0845042	0.170408	0	0.0310839	0.999232	0	0.0720751	0.784165	0	0.2363	0.0440632	1	-0.0476413	0.891117	0	-0.0039541	0.996572	0	0.0436872	0.999957	0	-0.205216	0.327195	0	-0.164224	0.491706	0	0.0409913	0.999975	0
A_21_P0006739	ENST00000433460	ENST00000433460				0.0771624	0.723086	0	0.0233124	0.937937	0	-0.0656222	0.700905	0	0.215327	0.999232	0	0.154907	0.787504	0	-0.183442	0.542214	0	0.142785	0.83593	0	0.0889346	0.943941	0	-0.05385	0.999957	0	0.39877	0.3763	0	0.33835	0.51512	0	-0.0604199	0.999975	0
A_23_P375566	NM_178509	NM_178509	252983	syntaxin binding protein 4	STXBP4	0.0210779	0.892205	0	-0.0669905	0.596052	0	0.071856	0.45036	0	0.11819	0.999232	0	0.116335	0.727055	0	0.000800987	0.998089	0	-0.0507781	0.92956	0	-0.138847	0.850492	0	-0.0880685	0.999957	0	0.117389	0.716034	0	0.115534	0.753304	0	-0.00185521	0.999975	0
A_23_P100392	NM_007108	NM_007108	6923	elongin B	ELOB	0.139426	0.168715	0	0.130385	0.178802	0	0.0788889	0.383036	0	0.136593	0.999232	0	0.0367667	0.948594	0	0.123921	0.503098	0	0.0605373	0.903621	0	0.0514959	0.94771	0	-0.00904141	0.999957	0	0.0126723	0.97585	0	-0.0871539	0.822934	0	-0.0998262	0.999975	0
A_23_P161446	NM_001494	NM_001494	2665	GDP dissociation inhibitor 2	GDI2	-0.0728809	0.624072	0	0.0455218	0.793316	0	0.0852835	0.425543	0	-0.0968412	0.999232	0	0.0477049	0.942501	0	0.139391	0.519574	0	-0.158164	0.734337	0	-0.0397617	0.968008	0	0.118403	0.999957	0	-0.236233	0.472467	0	-0.0916864	0.839737	0	0.144546	0.999975	0
A_33_P3233978	NM_032807	NM_032807	84893	F-box DNA helicase 1	FBH1	-0.185773	0.053719	0	-0.0376311	0.808181	0	-0.0236193	0.84506	0	0.00337032	0.999232	0	0.0504442	0.926659	0	-0.171524	0.329974	0	-0.162153	0.708257	0	-0.0140117	0.986784	0	0.148142	0.999957	0	0.174895	0.553711	0	0.221969	0.500895	0	0.0470739	0.999975	0
A_21_P0002073	ENST00000422600	ENST00000422600				0.0451657	0.938651	0	0.139324	0.796977	0	0.248261	0.461916	0	0.226488	0.999232	0	0.092057	0.969662	0	-0.954885	0.0962659	0	-0.203095	0.915331	0	-0.108937	0.969487	0	0.0941581	0.999957	0	1.18137	0.260422	0	1.04694	0.364874	0	-0.134431	0.999975	0
A_33_P3239152	NM_024816	NM_024816	79874	rabaptin, RAB GTPase binding effector protein 2	RABEP2	0.0205508	0.893821	0	-0.0465103	0.744736	0	-0.0713742	0.447916	0	0.00593045	0.999232	0	-0.0571022	0.910083	0	0.147587	0.412735	0	0.091925	0.830412	0	0.0248639	0.976027	0	-0.0670611	0.999957	0	-0.141657	0.644274	0	-0.204689	0.535268	0	-0.0630326	0.999975	0
A_23_P156319	NM_015315	NM_015315	23367	La ribonucleoprotein domain family member 1	LARP1	-0.223507	0.0251259	-1	-0.231688	0.0145833	-1	-0.178805	0.0385255	-1	-0.210215	0.999232	0	-0.297424	0.181661	0	-0.159258	0.405489	0	-0.0447018	0.947015	0	-0.0528833	0.951772	0	-0.00818143	0.999957	0	-0.0509573	0.900684	0	-0.138167	0.713511	0	-0.0872093	0.999975	0
A_33_P3284888	NM_198989	NM_198989	220107	deleted in lymphocytic leukemia, 7	DLEU7	0.00878668	0.973189	0	0.0708047	0.750608	0	0.0850212	0.584705	0	0.0662783	0.999232	0	-0.0619167	0.944059	0	-0.128685	0.682828	0	-0.0762345	0.933065	0	-0.0142165	0.991297	0	0.062018	0.999957	0	0.194963	0.687047	0	0.0667683	0.918028	0	-0.128195	0.999975	0
A_33_P3232280	NM_018164	NM_018164	55726	integrator complex subunit 13	INTS13	-0.0608868	0.613703	0	0.00384346	0.9858	0	0.0193969	0.866736	0	0.0775935	0.999232	0	-0.0131515	0.98573	0	0.0300529	0.896158	0	-0.0802837	0.84288	0	-0.0155535	0.982814	0	0.0647302	0.999957	0	0.0475406	0.892712	0	-0.0432044	0.910166	0	-0.090745	0.999975	0
A_23_P50646	NM_001193621	NM_001193621	390940	phospholipase A2 inhibitor and LY6/PLAUR domain containing	PINLYP	0.067821	0.667032	0	-0.0225493	0.918857	0	-0.0149954	0.923409	0	0.0853236	0.999232	0	-0.123048	0.771138	0	-0.0864537	0.728207	0	0.0828164	0.882686	0	-0.00755397	0.995345	0	-0.0903703	0.999957	0	0.171777	0.637187	0	-0.0365939	0.941945	0	-0.208371	0.999975	0
A_23_P117734	NM_152449	NM_152449	145748	LysM domain containing 4	LYSMD4	0.0662087	0.501252	0	-0.0424065	0.701435	0	0.0582621	0.442253	0	0.0335955	0.999232	0	0.0137835	0.980529	0	0.0631868	0.702899	0	0.0079466	0.989441	0	-0.100669	0.858639	0	-0.108615	0.999957	0	-0.0295913	0.926134	0	-0.0494033	0.878618	0	-0.019812	0.999975	0
A_33_P3383226	NM_000174	NM_000174	2815	glycoprotein IX platelet	GP9	-0.0659787	0.802085	0	-0.191923	0.319103	0	-0.0251533	0.914278	0	0.0728349	0.999232	0	-0.256692	0.636017	0	-0.369034	0.231751	0	-0.0408255	0.978736	0	-0.16677	0.886591	0	-0.125945	0.999957	0	0.441869	0.39958	0	0.112342	0.878514	0	-0.329527	0.999975	0
A_23_P109877	NM_025222	NM_025222	80335	WD repeat domain 82	WDR82	-0.129102	0.226745	0	-0.10211	0.343795	0	-0.043533	0.689011	0	-0.0490095	0.999232	0	-0.104668	0.771138	0	0.0651405	0.763529	0	-0.0855691	0.844757	0	-0.0585772	0.941775	0	0.0269919	0.999957	0	-0.11415	0.725169	0	-0.169808	0.622098	0	-0.0556583	0.999975	0
A_23_P209805	NM_005966	NM_005966	4664	NGFI-A binding protein 1	NAB1	-0.0472254	0.712295	0	-0.00330452	0.987102	0	-0.042776	0.665317	0	0.000768397	0.999386	0	0.197714	0.392957	0	0.092649	0.614988	0	-0.00444942	0.996063	0	0.0394715	0.961663	0	0.0439209	0.999957	0	-0.0918806	0.767543	0	0.105065	0.760476	0	0.196946	0.999975	0
A_23_P406227	NR_024399	NR_024399	197187	SNAI3 antisense RNA 1	SNAI3-AS1	0.00395072	0.995072	0	-0.499961	0.0683959	0	-0.259811	0.327396	0	0.124949	0.999232	0	-0.0998939	0.954374	0	0.00895125	0.992369	0	0.263761	0.839805	0	-0.24015	0.900547	0	-0.503912	0.999957	0	0.115998	0.919993	0	-0.108845	0.93053	0	-0.224843	0.999975	0
A_24_P64167	NM_000962	NM_000962	5742	prostaglandin-endoperoxide synthase 1	PTGS1	-0.322549	0.0133014	-1	-0.201502	0.131402	0	-0.0796491	0.565891	0	-0.0470017	0.999232	0	-0.292297	0.393662	0	-0.340328	0.133073	0	-0.2429	0.685006	0	-0.121853	0.890089	0	0.121047	0.999957	0	0.293327	0.461303	0	0.0480311	0.934729	0	-0.245296	0.999975	0
A_24_P289726	NM_002809	NM_002809	5709	proteasome 26S subunit, non-ATPase 3	PSMD3	-0.152733	0.251576	0	-0.0188975	0.935717	0	-0.0835996	0.483223	0	-0.0487901	0.999232	0	-0.234596	0.464151	0	0.0723019	0.789138	0	-0.0691332	0.91882	0	0.0647021	0.94771	0	0.133835	0.999957	0	-0.121092	0.769442	0	-0.306898	0.444384	0	-0.185806	0.999975	0
A_23_P123539	NM_002717	NM_002717	5520	protein phosphatase 2 regulatory subunit Balpha	PPP2R2A	-0.0945557	0.306763	0	0.00787691	0.963101	0	0.0260114	0.785837	0	-0.0748949	0.999232	0	0.0640132	0.856001	0	0.0749507	0.656966	0	-0.120567	0.719429	0	-0.0181345	0.98042	0	0.102433	0.999957	0	-0.149846	0.543857	0	-0.0109375	0.977694	0	0.138908	0.999975	0
A_23_P117546	NM_006939	NM_006939	6655	SOS Ras/Rho guanine nucleotide exchange factor 2	SOS2	-0.0955819	0.392337	0	-0.196385	0.0251143	-1	-0.0721134	0.428269	0	-0.0407964	0.999232	0	0.0710199	0.8665	0	-0.0557273	0.792633	0	-0.0234686	0.976329	0	-0.124272	0.851258	0	-0.100804	0.999957	0	0.0149308	0.97082	0	0.126747	0.713489	0	0.111816	0.999975	0
A_33_P3319463	NM_001145261	NM_001145261	8031	nuclear receptor coactivator 4	NCOA4	-0.0936784	0.654585	0	-0.127429	0.488236	0	-0.0961052	0.538749	0	-0.0144033	0.999232	0	-0.0364565	0.973776	0	-0.221128	0.448133	0	0.00242677	0.997941	0	-0.0313235	0.981347	0	-0.0337503	0.999957	0	0.206724	0.675257	0	0.184671	0.748585	0	-0.0220532	0.999975	0
A_33_P3304170	NM_002649	NM_002649	5294	phosphatidylinositol-4,5-bisphosphate 3-kinase catalytic subunit gamma	PIK3CG	0.0767311	0.49233	0	-0.0841758	0.40962	0	0.0520454	0.571937	0	-0.00724563	0.999232	0	-0.0749184	0.841903	0	0.102843	0.558513	0	0.0246858	0.972776	0	-0.136221	0.844713	0	-0.160907	0.999957	0	-0.110089	0.705921	0	-0.177762	0.562546	0	-0.0676728	0.999975	0
A_33_P3227551	ENST00000509069	ENST00000509069				-0.0129158	0.935909	0	-0.0147957	0.935609	0	0.0157431	0.896778	0	-0.037757	0.999232	0	-0.0737722	0.856053	0	-0.0737009	0.713527	0	-0.0286589	0.968258	0	-0.0305388	0.968749	0	-0.00187991	0.999957	0	0.035944	0.925401	0	-7.12893e-05	0.999782	0	-0.0360153	0.999975	0
A_23_P204208	NM_002262	NM_002262	3824	killer cell lectin like receptor D1	KLRD1	0.260287	0.0155461	1	0.177599	0.101525	0	0.198487	0.033099	1	0.26803	0.999232	0	0.108182	0.798539	0	0.205245	0.300909	0	0.0618	0.922701	0	-0.0208879	0.982814	0	-0.0826879	0.999957	0	0.0627851	0.884142	0	-0.0970631	0.8317	0	-0.159848	0.999975	0
A_33_P3227842	NM_001166006	NM_001166006	2035	erythrocyte membrane protein band 4.1	EPB41	-0.117761	0.259574	0	-0.125989	0.18993	0	-0.01668	0.891754	0	-0.046531	0.999232	0	0.115829	0.716896	0	-0.0820222	0.680247	0	-0.101081	0.795995	0	-0.109309	0.868895	0	-0.00822826	0.999957	0	0.0354911	0.926396	0	0.197851	0.54087	0	0.16236	0.999975	0
A_33_P3397865	NM_003283	NM_003283	7138	troponin T1, slow skeletal type	TNNT1	0.101805	0.706674	0	0.207823	0.320672	0	-0.0395849	0.873133	0	-0.0469748	0.999232	0	-0.358759	0.491417	0	0.0452317	0.930162	0	0.14139	0.879282	0	0.247408	0.858639	0	0.106017	0.999957	0	-0.0922065	0.904391	0	-0.40399	0.540338	0	-0.311784	0.999975	0
A_23_P123265	NM_015411	NM_015411	25870	sulfatase modifying factor 2	SUMF2	0.0497522	0.739885	0	-0.012048	0.954795	0	0.0439769	0.706237	0	0.0607052	0.999232	0	-0.00361742	0.995225	0	0.00698032	0.981884	0	0.00577529	0.995881	0	-0.0560249	0.94771	0	-0.0618002	0.999957	0	0.0537248	0.895428	0	-0.0105977	0.983322	0	-0.0643226	0.999975	0
A_24_P694760	NM_178040	NM_178040	23085	ELKS/RAB6-interacting/CAST family member 1	ERC1	0.0361273	0.800726	0	-0.126239	0.200131	0	-0.10592	0.214385	0	-0.0165556	0.999232	0	-0.181928	0.481873	0	-0.259701	0.106049	0	0.142047	0.719429	0	-0.0203189	0.981157	0	-0.162366	0.999957	0	0.243145	0.393785	0	0.077773	0.843846	0	-0.165372	0.999975	0
A_23_P115922	NM_004096	NM_004096	1979	eukaryotic translation initiation factor 4E binding protein 2	EIF4EBP2	-0.0466487	0.527946	0	-0.0467371	0.506773	0	-0.0243053	0.708523	0	-0.0044958	0.999232	0	0.0356647	0.904985	0	-0.102891	0.327291	0	-0.0223433	0.955105	0	-0.0224317	0.966456	0	-8.83911e-05	0.999957	0	0.0983955	0.582541	0	0.138556	0.483617	0	0.0401605	0.999975	0
A_33_P3288110	NM_001005476	NM_001005476	8502	plakophilin 4	PKP4	-0.076717	0.555633	0	-0.199305	0.0352281	-1	-0.10368	0.254048	0	0.108127	0.999232	0	-0.0199512	0.979535	0	0.0427578	0.859272	0	0.0269626	0.973765	0	-0.0956255	0.885246	0	-0.122588	0.999957	0	0.0653694	0.859725	0	-0.0627089	0.880833	0	-0.128078	0.999975	0
A_33_P3238866	NM_016038	NM_016038	51119	SBDS, ribosome maturation factor	SBDS	0.0600935	0.670704	0	0.0112912	0.957611	0	0.0448804	0.69701	0	0.0651651	0.999232	0	0.0650414	0.900336	0	0.198404	0.275596	0	0.0152131	0.98427	0	-0.0335892	0.968684	0	-0.0488022	0.999957	0	-0.133239	0.690001	0	-0.133362	0.724809	0	-0.000123706	0.999975	0
A_23_P8013	NM_003519	NM_003519	8340	histone cluster 1 H2B family member l	HIST1H2BL	-0.0507555	0.749582	0	-0.00710345	0.97744	0	-0.0833298	0.434129	0	0.0112035	0.999232	0	-0.176451	0.582179	0	-0.0655094	0.790787	0	0.0325743	0.970114	0	0.0762263	0.928903	0	0.0436521	0.999957	0	0.0767128	0.848396	0	-0.110942	0.79852	0	-0.187654	0.999975	0
A_23_P25503	NM_001079673	NM_001079673	22862	fibronectin type III domain containing 3A	FNDC3A	0.0809683	0.67632	0	0.147571	0.342223	0	0.186555	0.12408	0	-0.108627	0.999232	0	0.218564	0.600239	0	0.219887	0.40137	0	-0.105586	0.876872	0	-0.0389837	0.973893	0	0.0666027	0.999957	0	-0.328513	0.432129	0	-0.00132256	0.998075	0	0.327191	0.999975	0
A_33_P3242416	A_33_P3242416	A_33_P3242416				-0.000923068	0.998361	0	0.167821	0.466975	0	-0.0912723	0.668174	0	0.0726991	0.999232	0	0.00723318	0.995165	0	-0.20955	0.592371	0	0.0903492	0.940289	0	0.259094	0.850492	0	0.168744	0.999957	0	0.282249	0.648559	0	0.216783	0.771384	0	-0.0654659	0.999975	0
A_24_P246692	TCONS_l2_00026230	TCONS_l2_00026230				0.255078	0.117396	0	0.26559	0.081672	0	0.0549281	0.764958	0	-0.0532173	0.999232	0	0.193778	0.716896	0	0.350482	0.19963	0	0.20015	0.756871	0	0.210662	0.850492	0	0.0105118	0.999957	0	-0.403699	0.387562	0	-0.156704	0.803142	0	0.246995	0.999975	0
A_23_P121253	NM_003810	NM_003810	8743	TNF superfamily member 10	TNFSF10	0.0703748	0.789027	0	0.319845	0.0617298	0	0.113149	0.533038	0	0.100875	0.999232	0	0.177722	0.7941	0	0.398982	0.196479	0	-0.0427743	0.978073	0	0.206696	0.870782	0	0.24947	0.999957	0	-0.298108	0.589072	0	-0.221261	0.739192	0	0.0768469	0.999975	0
A_23_P149678	NM_006099	NM_006099	10401	protein inhibitor of activated STAT 3	PIAS3	-0.0192525	0.9029	0	-0.0501642	0.722889	0	0.00164807	0.990931	0	-0.136775	0.999232	0	-0.116801	0.727596	0	-0.0330622	0.894691	0	-0.0209006	0.979808	0	-0.0518122	0.950274	0	-0.0309117	0.999957	0	-0.103713	0.755375	0	-0.0837391	0.835337	0	0.0199734	0.999975	0
A_21_P0012676	NR_026575	NR_026575	2713	glycerol kinase 3 pseudogene	GK3P	-0.0787544	0.65082	0	-0.0781166	0.652221	0	-0.0786067	0.547663	0	0.154322	0.999232	0	0.0906909	0.881566	0	0.0555792	0.856049	0	-0.000147679	0.999803	0	0.000490169	0.999851	0	0.000637848	0.999957	0	0.0987425	0.829144	0	0.0351116	0.950833	0	-0.0636309	0.999975	0
A_33_P3311863	NM_001242837	NM_001242837	161	adaptor related protein complex 2 alpha 2 subunit	AP2A2	-0.0160748	0.937844	0	0.11439	0.400781	0	-0.0174657	0.911678	0	-0.0417208	0.999232	0	-0.075219	0.900336	0	-0.0874902	0.735884	0	0.00139088	0.998374	0	0.131855	0.87402	0	0.130464	0.999957	0	0.0457694	0.925246	0	0.0122713	0.983248	0	-0.0334982	0.999975	0
A_33_P3275600	NM_001206670	NM_001206670	123745	phospholipase A2 group IVE	PLA2G4E	0.174965	0.311998	0	0.0420451	0.874365	0	-0.0105878	0.961914	0	0.0689939	0.999232	0	0.254905	0.549785	0	0.0243922	0.953837	0	0.185553	0.767674	0	0.0526329	0.968684	0	-0.13292	0.999957	0	0.0446017	0.9428	0	0.230513	0.671159	0	0.185911	0.999975	0
A_23_P205830	NM_025238	NM_025238	53339	BTB domain containing 1	BTBD1	0.0110772	0.956389	0	0.032368	0.876459	0	0.127368	0.228015	0	-0.122154	0.999232	0	0.0873218	0.874212	0	-0.0531065	0.848817	0	-0.11629	0.823092	0	-0.0949995	0.907701	0	0.0212908	0.999957	0	-0.069048	0.878629	0	0.140428	0.751929	0	0.209476	0.999975	0
A_23_P83838	NM_004056	NM_004056	767	carbonic anhydrase 8	CA8	-0.103559	0.474588	0	-0.0716015	0.650285	0	-0.0529743	0.680837	0	-0.0483236	0.999232	0	-0.0836636	0.87891	0	-0.0409845	0.88903	0	-0.0505846	0.947015	0	-0.0186271	0.98509	0	0.0319575	0.999957	0	-0.00733915	0.989174	0	-0.0426792	0.933638	0	-0.03534	0.999975	0
A_21_P0003243	TCONS_00006916	TCONS_00006916				0.181286	0.264266	0	0.0568475	0.80707	0	0.0756612	0.628373	0	0.265847	0.999232	0	0.253076	0.534545	0	-0.20733	0.455873	0	0.105625	0.882686	0	-0.0188137	0.987989	0	-0.124439	0.999957	0	0.473177	0.285297	0	0.460406	0.350538	0	-0.0127714	0.999975	0
A_33_P3305203	AK095276	AK095276				-0.102917	0.491894	0	-0.102386	0.468613	0	-0.0343803	0.807731	0	-0.082833	0.999232	0	0.0486136	0.945127	0	-0.202801	0.351877	0	-0.0685365	0.91882	0	-0.0680058	0.944936	0	0.000530715	0.999957	0	0.119968	0.769442	0	0.251414	0.539347	0	0.131447	0.999975	0
A_24_P91916	NM_018698	NM_018698	55916	nuclear transport factor 2 like export factor 2	NXT2	0.057105	0.697891	0	0.070251	0.609746	0	0.0912675	0.352448	0	0.0492532	0.999232	0	0.115842	0.759705	0	0.107324	0.615062	0	-0.0341624	0.965151	0	-0.0210165	0.981347	0	0.0131459	0.999957	0	-0.0580705	0.887425	0	0.00851834	0.986021	0	0.0665888	0.999975	0
A_19_P00810474	ENST00000572681	ENST00000572681				0.121461	0.462385	0	0.0393274	0.864088	0	-0.181973	0.113128	0	0.126361	0.999232	0	0.0587408	0.940748	0	-0.205116	0.41247	0	0.303434	0.685006	0	0.2213	0.835508	0	-0.0821338	0.999957	0	0.331477	0.404815	0	0.263856	0.568542	0	-0.0676202	0.999975	0
A_33_P3309999	NM_001013628	NM_001013628	340578	DDB1 and CUL4 associated factor 12 like 2	DCAF12L2	0.179476	0.578175	0	0.2265	0.428033	0	0.0260551	0.940424	0	0.552327	0.999232	0	0.107828	0.941386	0	-0.201161	0.701067	0	0.153421	0.906499	0	0.200444	0.905109	0	0.0470231	0.999957	0	0.753488	0.307527	0	0.308989	0.735436	0	-0.444499	0.999975	0
A_23_P160787	NM_004565	NM_004565	5195	peroxisomal biogenesis factor 14	PEX14	0.00824468	0.954974	0	-0.0253517	0.860758	0	-0.00628119	0.959352	0	0.000226627	0.999672	0	-0.137772	0.569019	0	-0.0834668	0.630014	0	0.0145259	0.982652	0	-0.0190705	0.979836	0	-0.0335964	0.999957	0	0.0836934	0.772873	0	-0.0543051	0.877307	0	-0.137999	0.999975	0
A_24_P280803	ENST00000492356	ENST00000492356				0.481789	0.013849	1	0.456662	0.0142017	1	0.20365	0.266301	0	0.13071	0.999232	0	0.245705	0.719241	0	0.383871	0.284558	0	0.278139	0.739227	0	0.253012	0.86316	0	-0.0251268	0.999957	0	-0.25316	0.700949	0	-0.138165	0.868795	0	0.114995	0.999975	0
A_33_P3627001	NM_144962	NM_144962	157310	phosphatidylethanolamine binding protein 4	PEBP4	0.0735263	0.701485	0	0.0287957	0.910642	0	-0.0380766	0.816908	0	-0.0725088	0.999232	0	0.0231755	0.982269	0	-0.201957	0.433357	0	0.111603	0.856713	0	0.0668722	0.954985	0	-0.0447307	0.999957	0	0.129448	0.783775	0	0.225133	0.640663	0	0.0956843	0.999975	0
A_21_P0009475	TCONS_00026327	TCONS_00026327				0.0782437	0.502799	0	-0.0364356	0.803679	0	-0.0718189	0.421446	0	0.095074	0.999232	0	-0.00654507	0.991567	0	-0.0944274	0.615671	0	0.150063	0.708281	0	0.0353833	0.966957	0	-0.114679	0.999957	0	0.189501	0.493359	0	0.0878823	0.813119	0	-0.101619	0.999975	0
A_33_P3399263	NM_001243539	NM_001243539	3601	interleukin 15 receptor subunit alpha	IL15RA	0.000418039	0.998442	0	0.172346	0.16005	0	0.00805487	0.963901	0	-0.147928	0.999232	0	-0.0816147	0.891617	0	0.0449941	0.881027	0	-0.00763683	0.995009	0	0.164292	0.850492	0	0.171928	0.999957	0	-0.192922	0.611216	0	-0.126609	0.790389	0	0.0663133	0.999975	0
A_33_P3264577	NM_004082	NM_004082	1639	dynactin subunit 1	DCTN1	-0.231679	0.0774986	0	-0.129856	0.375533	0	-0.194715	0.0783723	0	-0.100907	0.999232	0	-0.288561	0.383675	0	-0.0701715	0.815294	0	-0.0369646	0.972402	0	0.0648592	0.953978	0	0.101824	0.999957	0	-0.0307353	0.957025	0	-0.21839	0.636255	0	-0.187655	0.999975	0
A_24_P398432	NM_001040118	NM_001040118	116985	ArfGAP with RhoGAP domain, ankyrin repeat and PH domain 1	ARAP1	-0.397399	0.000959241	-1	-0.274811	0.00900294	-1	-0.24519	0.0103732	-1	-0.138539	0.999232	0	-0.139584	0.719241	0	-0.0315917	0.915253	0	-0.152209	0.748068	0	-0.0296206	0.976027	0	0.122588	0.999957	0	-0.106947	0.788537	0	-0.107993	0.814864	0	-0.00104554	0.999975	0
A_33_P3311160	AB385295	AB385295				-0.085704	0.416958	0	0.0074791	0.968462	0	-0.103071	0.18111	0	0.0513722	0.999232	0	-0.00379226	0.995037	0	-0.00533177	0.984072	0	0.0173669	0.980829	0	0.11055	0.861575	0	0.0931831	0.999957	0	0.0567039	0.860451	0	0.00153951	0.996246	0	-0.0551644	0.999975	0
A_24_P270460	NM_005532	NM_005532	3429	interferon alpha inducible protein 27	IFI27	0.443843	0.474414	0	0.99658	0.0339402	1	0.0559054	0.936088	0	0.474767	0.999232	0	-0.784488	0.593944	0	-0.229239	0.845331	0	0.387938	0.868411	0	0.940675	0.827784	0	0.552737	0.999957	0	0.704005	0.660103	0	-0.55525	0.771427	0	-1.25925	0.999975	0
A_24_P942250	NM_025134	NM_025134	80205	chromodomain helicase DNA binding protein 9	CHD9	0.219181	0.0443307	1	0.178223	0.0985142	0	0.134914	0.162038	0	-0.00131421	0.999232	0	0.169713	0.604216	0	0.109319	0.628539	0	0.0842668	0.871739	0	0.0433089	0.966283	0	-0.0409579	0.999957	0	-0.110633	0.769722	0	0.0603938	0.89761	0	0.171027	0.999975	0
A_23_P91590	NM_002882	NM_002882	5902	RAN binding protein 1	RANBP1	0.12942	0.541264	0	0.0903793	0.698688	0	-0.144855	0.347124	0	0.0756547	0.999232	0	-0.00264291	0.998553	0	0.419233	0.132045	0	0.274275	0.708257	0	0.235235	0.850492	0	-0.0390403	0.999957	0	-0.343579	0.486099	0	-0.421876	0.444022	0	-0.0782976	0.999975	0
A_24_P606663	A_24_P606663	A_24_P606663				0.258411	0.400514	0	0.345422	0.18993	0	-0.0271462	0.940552	0	0.384223	0.999232	0	0.289658	0.752712	0	0.111619	0.857222	0	0.285557	0.790982	0	0.372568	0.850149	0	0.0870115	0.999957	0	0.272604	0.756074	0	0.178039	0.867996	0	-0.0945653	0.999975	0
A_23_P42588	NM_018384	NM_018384	55340	GTPase, IMAP family member 5	GIMAP5	0.0498352	0.727724	0	0.179925	0.0597635	0	0.182497	0.0291172	1	-0.00451748	0.999232	0	0.0373499	0.949964	0	0.232745	0.17442	0	-0.132662	0.748068	0	-0.0025723	0.999185	0	0.13009	0.999957	0	-0.237263	0.424372	0	-0.195395	0.572501	0	0.0418674	0.999975	0
A_33_P3350452	A_33_P3350452	A_33_P3350452				0.171451	0.38214	0	0.202916	0.242641	0	0.028386	0.895347	0	0.34253	0.999232	0	0.17935	0.768808	0	0.0536029	0.899576	0	0.143065	0.848075	0	0.17453	0.87537	0	0.0314651	0.999957	0	0.288927	0.569951	0	0.125747	0.85456	0	-0.16318	0.999975	0
A_33_P3401452	NM_032221	NM_032221	84181	chromodomain helicase DNA binding protein 6	CHD6	-0.0943312	0.551771	0	-0.161516	0.198645	0	-0.093156	0.433192	0	0.0709368	0.999232	0	0.0104915	0.991469	0	-0.00205559	0.996479	0	-0.00117522	0.998858	0	-0.06836	0.946046	0	-0.0671848	0.999957	0	0.0729924	0.875907	0	0.0125471	0.98327	0	-0.0604453	0.999975	0
A_33_P3414242	NM_001008229	NM_001008229	4340	myelin oligodendrocyte glycoprotein	MOG	0.122109	0.660945	0	0.0485115	0.895511	0	0.0222123	0.937847	0	0.0196784	0.999232	0	0.0977477	0.934169	0	-0.311622	0.411335	0	0.0998963	0.935216	0	0.0262993	0.987989	0	-0.073597	0.999957	0	0.3313	0.598997	0	0.409369	0.559114	0	0.0780693	0.999975	0
A_33_P3356525	AK127393	AK127393				0.0456006	0.792001	0	0.0515731	0.773111	0	-0.0223549	0.883684	0	0.0372264	0.999232	0	-0.08198	0.883787	0	-0.0639666	0.810928	0	0.0679555	0.917066	0	0.073928	0.936034	0	0.00597248	0.999957	0	0.101193	0.806684	0	-0.0180134	0.97421	0	-0.119206	0.999975	0
A_21_P0013755	NM_014888	NM_014888	10447	family with sequence similarity 3 member C	FAM3C	-0.033987	0.870429	0	0.0305906	0.90108	0	0.104076	0.41868	0	0.0759085	0.999232	0	0.199822	0.619248	0	0.145334	0.586373	0	-0.138063	0.810026	0	-0.0734853	0.946046	0	0.0645776	0.999957	0	-0.0694253	0.894431	0	0.0544878	0.924203	0	0.123913	0.999975	0
A_24_P185314	NM_003826	NM_003826	8774	NSF attachment protein gamma	NAPG	0.114956	0.464795	0	0.023691	0.923847	0	0.213449	0.045993	1	-0.120371	0.999232	0	0.131595	0.781923	0	0.070939	0.806202	0	-0.0984931	0.868835	0	-0.189758	0.84917	0	-0.0912647	0.999957	0	-0.19131	0.6351	0	0.0606555	0.910382	0	0.251965	0.999975	0
A_21_P0010801	TCONS_l2_00002836	TCONS_l2_00002836				0.0760506	0.718743	0	0.075597	0.723894	0	0.0125058	0.95245	0	0.0274346	0.999232	0	-0.0117054	0.991567	0	0.201422	0.479998	0	0.0635448	0.94799	0	0.0630912	0.963382	0	-0.000453634	0.999957	0	-0.173987	0.723431	0	-0.213127	0.689633	0	-0.03914	0.999975	0
A_24_P92367	NM_001017964	NM_001017964	150223	YdjC chitooligosaccharide deacetylase homolog	YDJC	0.0959195	0.346528	0	0.138212	0.109546	0	0.127213	0.0896036	0	-0.0225874	0.999232	0	0.0655565	0.872033	0	0.185692	0.226529	0	-0.0312936	0.960549	0	0.0109992	0.987989	0	0.0422928	0.999957	0	-0.20828	0.426199	0	-0.120136	0.707514	0	0.0881439	0.999975	0
A_33_P3290924	NM_001172415	NM_001172415	573	BCL2 associated athanogene 1	BAG1	0.0466541	0.892042	0	-0.0766451	0.826254	0	0.218391	0.263557	0	0.0934075	0.999232	0	0.208745	0.800207	0	-0.0655882	0.905734	0	-0.171737	0.860827	0	-0.295036	0.850492	0	-0.123299	0.999957	0	0.158996	0.838144	0	0.274333	0.730377	0	0.115337	0.999975	0
A_23_P104464	NM_000698	NM_000698	240	arachidonate 5-lipoxygenase	ALOX5	-0.3158	0.00563386	-1	-0.426872	4.17964e-05	-1	-0.289155	0.00293927	-1	-0.124482	0.999232	0	-0.162173	0.654029	0	-0.203458	0.33467	0	-0.0266447	0.978986	0	-0.137717	0.867538	0	-0.111072	0.999957	0	0.0789761	0.853283	0	0.0412854	0.935121	0	-0.0376907	0.999975	0
A_21_P0002945	TCONS_00005991	TCONS_00005991				-0.137799	0.526364	0	0.160564	0.414862	0	-0.0443209	0.833168	0	0.0212076	0.999232	0	0.183331	0.771138	0	0.039822	0.931203	0	-0.0934783	0.924268	0	0.204885	0.867538	0	0.298363	0.999957	0	-0.0186144	0.980231	0	0.143509	0.837422	0	0.162123	0.999975	0
A_21_P0005646	TCONS_00014579	TCONS_00014579				-0.116228	0.614482	0	-0.0396202	0.90108	0	0.0103941	0.96795	0	0.191516	0.999232	0	0.0874771	0.930097	0	-0.475081	0.0994928	0	-0.126623	0.87991	0	-0.0500143	0.972403	0	0.0766082	0.999957	0	0.666597	0.226282	0	0.562558	0.337272	0	-0.104039	0.999975	0
A_33_P3267195	ENST00000380106	ENST00000380106				0.0784853	0.579911	0	0.0906523	0.484343	0	-0.0352013	0.78153	0	0.0601254	0.999232	0	0.102545	0.808385	0	-0.107751	0.626623	0	0.113687	0.803935	0	0.125854	0.86851	0	0.012167	0.999957	0	0.167877	0.622081	0	0.210297	0.577313	0	0.0424199	0.999975	0
A_33_P3400943	NM_001199054	NM_001199054	29965	cell death inducing p53 target 1	CDIP1	-0.0162793	0.895355	0	-0.177464	0.0127697	-1	-0.036758	0.662708	0	-0.0246106	0.999232	0	-0.160054	0.430215	0	-0.128552	0.366341	0	0.0204787	0.974541	0	-0.140706	0.829649	0	-0.161185	0.999957	0	0.103941	0.676418	0	-0.0315014	0.924212	0	-0.135443	0.999975	0
A_23_P344037	NM_018223	NM_018223	55743	checkpoint with forkhead and ring finger domains	CHFR	-0.0639552	0.591067	0	0.0323109	0.825546	0	-0.00157272	0.990707	0	0.0668467	0.999232	0	-0.0124518	0.986705	0	0.133146	0.435596	0	-0.0623824	0.887536	0	0.0338836	0.966957	0	0.096266	0.999957	0	-0.0662994	0.83882	0	-0.145598	0.646606	0	-0.0792985	0.999975	0
A_24_P97931	NM_001320	NM_001320	1460	casein kinase 2 beta	CSNK2B	-0.0510263	0.688766	0	0.00888106	0.962842	0	-0.0195102	0.868254	0	-0.0767688	0.999232	0	-0.19106	0.429879	0	-0.010245	0.968305	0	-0.0315161	0.962445	0	0.0283913	0.969487	0	0.0599074	0.999957	0	-0.0665237	0.841378	0	-0.180815	0.568023	0	-0.114291	0.999975	0
A_23_P103919	NM_003779	NM_003779	8703	beta-1,4-galactosyltransferase 3	B4GALT3	-0.00842209	0.961354	0	0.031047	0.855181	0	0.0516578	0.63393	0	0.0310275	0.999232	0	0.0741936	0.875179	0	-0.0680859	0.761407	0	-0.0600799	0.913907	0	-0.0206108	0.981347	0	0.0394691	0.999957	0	0.0991135	0.774983	0	0.14228	0.697266	0	0.0431661	0.999975	0
A_21_P0014160	THC2678006	THC2678006				0.145418	0.642111	0	0.0931135	0.798181	0	0.041208	0.891131	0	0.0340858	0.999232	0	-0.0347547	0.985218	0	-0.169966	0.735108	0	0.10421	0.94544	0	0.0519055	0.979836	0	-0.0523043	0.999957	0	0.204052	0.801222	0	0.135212	0.887339	0	-0.0688406	0.999975	0
A_23_P17275	NM_016544	NM_016544	51277	DnaJ heat shock protein family (Hsp40) member C27	DNAJC27	-0.151558	0.159652	0	-0.129564	0.21903	0	-0.0932728	0.323386	0	0.016798	0.999232	0	0.0477776	0.937457	0	0.0111048	0.969133	0	-0.0582849	0.919871	0	-0.0362908	0.968415	0	0.0219941	0.999957	0	0.00569318	0.99041	0	0.0366728	0.934345	0	0.0309797	0.999975	0
A_33_P3378707	NR_027053	NR_027053	646214	p21 protein (Cdc42/Rac)-activated kinase 2 pseudogene	LOC646214	0.0824053	0.705079	0	-0.061668	0.801161	0	-0.014132	0.948309	0	0.152203	0.999232	0	0.0407397	0.969662	0	-0.040103	0.920648	0	0.0965373	0.906432	0	-0.0475361	0.969993	0	-0.144073	0.999957	0	0.192306	0.704043	0	0.0808427	0.901619	0	-0.111464	0.999975	0
A_21_P0000753	NR_038289	NR_038289	100507086	DLG1 antisense RNA 1	DLG1-AS1	0.0876592	0.472894	0	0.0549442	0.689335	0	-0.0128922	0.9229	0	-0.0335547	0.999232	0	-0.0335441	0.955641	0	-0.0442781	0.848216	0	0.100551	0.811577	0	0.0678364	0.928903	0	-0.032715	0.999957	0	0.0107234	0.980215	0	0.010734	0.981748	0	1.05534e-05	0.999983	0
A_23_P97328	NM_024319	NM_024319	79169	chromosome 1 open reading frame 35	C1orf35	-0.0202461	0.880413	0	-0.00831607	0.962842	0	0.0121898	0.914308	0	-0.144158	0.999232	0	-0.0479716	0.916677	0	0.150132	0.334221	0	-0.0324359	0.957049	0	-0.0205059	0.978506	0	0.01193	0.999957	0	-0.294291	0.260422	0	-0.198104	0.498358	0	0.0961867	0.999975	0
A_33_P3313660	NR_002730	NR_002730	23629	bromodomain containing 7 pseudogene 3	BRD7P3	0.0106755	0.963643	0	-0.140068	0.35102	0	-0.0201781	0.910168	0	-0.0212913	0.999232	0	-0.0929753	0.888471	0	-0.343041	0.133147	0	0.0308535	0.97906	0	-0.119889	0.892257	0	-0.150743	0.999957	0	0.32175	0.424372	0	0.250066	0.594991	0	-0.071684	0.999975	0
A_23_P14928	NM_020312	NM_020312	57017	coenzyme Q9	COQ9	-0.0510221	0.685009	0	-0.0262758	0.867505	0	0.0160431	0.892092	0	-0.0658746	0.999232	0	-0.161618	0.51903	0	0.175187	0.27555	0	-0.0670653	0.879058	0	-0.0423189	0.958639	0	0.0247464	0.999957	0	-0.241062	0.36861	0	-0.336805	0.303727	0	-0.0957432	0.999975	0
A_21_P0005693	ENST00000521660	ENST00000521660				0.157772	0.375195	0	0.0835523	0.694851	0	0.0510996	0.772172	0	0.115765	0.999232	0	-0.00682532	0.994827	0	-0.110907	0.735998	0	0.106672	0.88368	0	0.0324527	0.980712	0	-0.0742196	0.999957	0	0.226672	0.636149	0	0.104082	0.867996	0	-0.122591	0.999975	0
A_23_P111811	NM_019071	NM_019071	54556	inhibitor of growth family member 3	ING3	-0.0532021	0.64826	0	-0.147533	0.0735369	0	0.0329255	0.735787	0	-0.173616	0.999232	0	-0.0143253	0.982302	0	-0.147865	0.343188	0	-0.0861277	0.818664	0	-0.180459	0.827784	0	-0.0943313	0.999957	0	-0.0257502	0.94132	0	0.13354	0.661684	0	0.15929	0.999975	0
A_23_P105313	NM_001414	NM_001414	1967	eukaryotic translation initiation factor 2B subunit alpha	EIF2B1	-0.0738203	0.477535	0	-0.0300992	0.823251	0	0.0236706	0.812703	0	-0.0792655	0.999232	0	-0.115022	0.660824	0	0.0195306	0.930591	0	-0.0974909	0.775893	0	-0.0537698	0.935587	0	0.0437212	0.999957	0	-0.0987961	0.720118	0	-0.134552	0.646539	0	-0.0357561	0.999975	0
A_24_P97825	NM_015621	NM_015621	26112	coiled-coil domain containing 69	CCDC69	-0.221633	0.0691313	0	-0.0695303	0.681515	0	0.0442931	0.751597	0	-0.106082	0.999232	0	-0.0480634	0.947295	0	0.0809519	0.764461	0	-0.265927	0.685006	0	-0.113823	0.887155	0	0.152103	0.999957	0	-0.187034	0.626023	0	-0.129015	0.785285	0	0.0580187	0.999975	0
A_23_P330537	NM_080861	NM_080861	90864	splA/ryanodine receptor domain and SOCS box containing 3	SPSB3	-0.108637	0.338961	0	0.0190404	0.920164	0	0.00495879	0.97263	0	0.00865317	0.999232	0	0.0258052	0.969959	0	0.184566	0.293813	0	-0.113595	0.780026	0	0.0140816	0.986989	0	0.127677	0.999957	0	-0.175913	0.55732	0	-0.158761	0.646606	0	0.017152	0.999975	0
A_21_P0011106	ENST00000545517	ENST00000545517				-0.0104474	0.961033	0	0.0726217	0.671207	0	-0.0430008	0.765886	0	0.0386828	0.999232	0	-0.109963	0.828233	0	-0.151399	0.536049	0	0.0325535	0.975198	0	0.115623	0.887155	0	0.083069	0.999957	0	0.190082	0.627083	0	0.0414364	0.93874	0	-0.148646	0.999975	0
A_23_P135326	NM_017443	NM_017443	54107	DNA polymerase epsilon 3, accessory subunit	POLE3	0.0425157	0.682036	0	-0.0368639	0.738292	0	0.0903912	0.16937	0	-0.0795685	0.999232	0	-0.0730088	0.799421	0	0.093042	0.52778	0	-0.0478755	0.903044	0	-0.127255	0.835508	0	-0.0793796	0.999957	0	-0.17261	0.437195	0	-0.166051	0.516667	0	0.00655972	0.999975	0
A_23_P63825	NM_002079	NM_002079	2805	glutamic-oxaloacetic transaminase 1	GOT1	-0.0383974	0.730699	0	-0.0188788	0.894071	0	-0.0324136	0.710497	0	-0.0721224	0.999232	0	-0.116541	0.619432	0	-0.109728	0.460582	0	-0.00598381	0.994074	0	0.0135347	0.982814	0	0.0195185	0.999957	0	0.0376053	0.903888	0	-0.00681287	0.984907	0	-0.0444182	0.999975	0
A_33_P3236071	NM_016509	NM_016509	51266	C-type lectin domain family 1 member B	CLEC1B	-0.0643131	0.710666	0	-0.0312658	0.886373	0	0.044775	0.750292	0	-0.0217529	0.999232	0	-0.0827311	0.891281	0	-0.20853	0.352233	0	-0.109088	0.84288	0	-0.0760408	0.937066	0	0.0330473	0.999957	0	0.186777	0.630046	0	0.125799	0.793843	0	-0.0609781	0.999975	0
A_21_P0000473	NR_003704	NR_003704	100124534	small nucleolar RNA, H/ACA box 84	SNORA84	0.0622123	0.730884	0	0.0267646	0.910233	0	-0.0113882	0.949313	0	0.138555	0.999232	0	0.0956135	0.866451	0	-0.0745309	0.793845	0	0.0736006	0.917073	0	0.0381528	0.971345	0	-0.0354478	0.999957	0	0.213086	0.585725	0	0.170144	0.713511	0	-0.0429412	0.999975	0
A_33_P3854030	NM_018328	NM_018328	55777	methyl-CpG binding domain protein 5	MBD5	-0.103555	0.333849	0	-0.0979289	0.339434	0	0.0295616	0.786998	0	-0.0077642	0.999232	0	0.0443733	0.934782	0	0.0330995	0.887403	0	-0.133116	0.732927	0	-0.12749	0.850492	0	0.00562576	0.999957	0	-0.0408637	0.913464	0	0.0112738	0.979717	0	0.0521375	0.999975	0
A_33_P3255647	NM_001199973	NM_001199973	100529097	RPL36A-HNRNPH2 readthrough	RPL36A-HNRNPH2	-0.0637671	0.632562	0	0.0813965	0.492965	0	-0.0641218	0.519489	0	0.0177555	0.999232	0	0.220931	0.380787	0	-0.0660354	0.762992	0	0.000354657	0.999338	0	0.145518	0.849447	0	0.145164	0.999957	0	0.083791	0.811746	0	0.286967	0.383369	0	0.203176	0.999975	0
A_24_P88554	NM_003846	NM_003846	8799	peroxisomal biogenesis factor 11 beta	PEX11B	0.15361	0.0839073	0	0.0901153	0.356989	0	0.159361	0.0307238	1	-0.0164805	0.999232	0	0.0572665	0.89708	0	0.183719	0.231751	0	-0.005751	0.994942	0	-0.0692453	0.908462	0	-0.0634944	0.999957	0	-0.2002	0.441421	0	-0.126453	0.689818	0	0.073747	0.999975	0
A_23_P119102	NM_003370	NM_003370	7408	vasodilator stimulated phosphoprotein	VASP	0.0088746	0.965704	0	-0.101634	0.46892	0	-0.189528	0.0576816	0	0.117453	0.999232	0	-0.189463	0.584781	0	-0.0730889	0.784556	0	0.198403	0.708257	0	0.0878944	0.916893	0	-0.110509	0.999957	0	0.190541	0.604531	0	-0.116374	0.805365	0	-0.306915	0.999975	0
A_33_P3334895	NM_001134408	NM_001134408	2903	glutamate ionotropic receptor NMDA type subunit 2A	GRIN2A	0.0975871	0.741756	0	-0.0106564	0.981606	0	-0.0219451	0.939729	0	0.0620736	0.999232	0	0.120959	0.910412	0	-0.41374	0.251825	0	0.119532	0.917066	0	0.0112887	0.996839	0	-0.108244	0.999957	0	0.475813	0.434053	0	0.534699	0.436691	0	0.0588855	0.999975	0
A_23_P205529	NM_022734	NM_022734	64745	methyltransferase like 17	METTL17	0.012216	0.937882	0	0.012533	0.945135	0	-0.0166762	0.888919	0	-0.0967528	0.999232	0	0.0735834	0.848541	0	0.0351566	0.873683	0	0.0288922	0.965798	0	0.0292092	0.969184	0	0.000317031	0.999957	0	-0.131909	0.648559	0	0.0384268	0.92191	0	0.170336	0.999975	0
A_23_P123905	NM_016042	NM_016042	51010	exosome component 3	EXOSC3	0.0835555	0.405091	0	0.0491789	0.671392	0	0.0955297	0.198776	0	0.0421879	0.999232	0	0.0256677	0.96107	0	0.0239741	0.9126	0	-0.0119742	0.984482	0	-0.0463509	0.946046	0	-0.0343767	0.999957	0	0.0182138	0.960653	0	0.0016936	0.996171	0	-0.0165202	0.999975	0
A_23_P44768	NM_013254	NM_013254	29110	TANK binding kinase 1	TBK1	0.0394561	0.845548	0	0.0641372	0.745023	0	0.0862449	0.52083	0	-0.074297	0.999232	0	0.198856	0.619432	0	0.415309	0.0606173	0	-0.0467888	0.961771	0	-0.0221077	0.983257	0	0.0246811	0.999957	0	-0.489606	0.248244	0	-0.216453	0.645078	0	0.273153	0.999975	0
A_23_P32233	NM_004235	NM_004235	9314	Kruppel like factor 4	KLF4	-0.0165097	0.935873	0	-0.104148	0.462848	0	-0.186824	0.0654177	0	0.128286	0.999232	0	-0.221975	0.496328	0	-0.020595	0.95109	0	0.170314	0.737285	0	0.0826755	0.928903	0	-0.0876388	0.999957	0	0.148881	0.705007	0	-0.20138	0.634924	0	-0.350261	0.999975	0
A_23_P501435	NM_020536	NM_020536	57325	lysine acetyltransferase 14	KAT14	0.0648243	0.562241	0	-0.0536942	0.64405	0	0.00556045	0.965029	0	-0.0786252	0.999232	0	-0.00332207	0.995165	0	-0.0439996	0.826462	0	0.0592638	0.887644	0	-0.0592547	0.928903	0	-0.118518	0.999957	0	-0.0346256	0.92088	0	0.0406776	0.911498	0	0.0753031	0.999975	0
A_33_P3347040	NM_001242901	NM_001242901	100131094	DPP9 antisense RNA 1	DPP9-AS1	0.113497	0.686586	0	0.142243	0.584453	0	-0.121377	0.561238	0	-0.0743839	0.999232	0	-0.0461997	0.974345	0	-0.400604	0.26297	0	0.234873	0.777542	0	0.26362	0.858576	0	0.0287461	0.999957	0	0.326221	0.604531	0	0.354405	0.621649	0	0.0281841	0.999975	0
A_33_P3265309	NM_001817	NM_001817	1089	carcinoembryonic antigen related cell adhesion molecule 4	CEACAM4	0.0573561	0.705782	0	-0.0294356	0.877085	0	-0.109291	0.264102	0	0.168879	0.999232	0	0.0242388	0.974996	0	0.0341858	0.901423	0	0.166647	0.712348	0	0.0798558	0.917218	0	-0.0867917	0.999957	0	0.134693	0.702514	0	-0.00994703	0.984907	0	-0.14464	0.999975	0
A_23_P28105	NM_004622	NM_004622	7247	translin	TSN	0.0610611	0.592081	0	-0.000822727	0.99751	0	0.0433023	0.643005	0	-0.00722842	0.999232	0	-0.042094	0.933986	0	0.0707534	0.70001	0	0.0177588	0.980079	0	-0.044125	0.952131	0	-0.0618839	0.999957	0	-0.0779819	0.796504	0	-0.112847	0.722109	0	-0.0348656	0.999975	0
A_33_P3328289	A_33_P3328289	A_33_P3328289				0.0653307	0.73518	0	0.0642461	0.748713	0	0.0029371	0.98917	0	-0.127888	0.999232	0	0.08117	0.905894	0	-0.0737012	0.810928	0	0.0623936	0.940613	0	0.061309	0.960021	0	-0.00108455	0.999957	0	-0.0541872	0.920774	0	0.154871	0.761717	0	0.209058	0.999975	0
A_23_P24104	NM_002658	NM_002658	5328	plasminogen activator, urokinase	PLAU	-0.214351	0.117596	0	-0.28937	0.0188964	-1	-0.244321	0.0281461	-1	0.030811	0.999232	0	-0.198843	0.619248	0	-0.129232	0.634894	0	0.0299705	0.979254	0	-0.0450486	0.968684	0	-0.0750191	0.999957	0	0.160043	0.715987	0	-0.0696103	0.901619	0	-0.229654	0.999975	0
A_33_P3264569	ENST00000426318	ENST00000426318				-0.00969538	0.960039	0	0.0660025	0.671432	0	0.00958024	0.952228	0	0.105179	0.999232	0	0.0792054	0.883806	0	-0.144694	0.510856	0	-0.0192756	0.982652	0	0.0564222	0.952404	0	0.0756978	0.999957	0	0.249873	0.455043	0	0.223899	0.56599	0	-0.0259738	0.999975	0
A_23_P104892	NM_001418	NM_001418	1982	eukaryotic translation initiation factor 4 gamma 2	EIF4G2	-0.205488	0.19295	0	-0.101154	0.593056	0	0.0923126	0.536067	0	-0.290043	0.999232	0	0.0720347	0.932908	0	0.103214	0.748694	0	-0.297801	0.685006	0	-0.193467	0.851258	0	0.104334	0.999957	0	-0.393257	0.365292	0	-0.0311796	0.963223	0	0.362077	0.999975	0
A_21_P0010562	NR_027002	NR_027002	388692	uncharacterized LOC388692	LOC388692	0.0439539	0.807664	0	-0.0264259	0.907078	0	-0.139325	0.194139	0	0.0966591	0.999232	0	-0.0712218	0.910412	0	0.0455144	0.879504	0	0.183279	0.71662	0	0.112899	0.888161	0	-0.0703798	0.999957	0	0.0511447	0.918144	0	-0.116736	0.810479	0	-0.167881	0.999975	0
A_23_P113572	NM_001770	NM_001770	930	CD19 molecule	CD19	0.0170912	0.938215	0	-0.170902	0.193728	0	-0.0762154	0.566495	0	-0.196215	0.999232	0	-0.155278	0.722033	0	-0.0297328	0.931678	0	0.0933066	0.882686	0	-0.0946868	0.91913	0	-0.187993	0.999957	0	-0.166482	0.690073	0	-0.125545	0.807233	0	0.0409364	0.999975	0
A_33_P3289422	NM_001040185	NM_001040185	91661	zinc finger protein 765	ZNF765	0.105964	0.559174	0	0.048216	0.833314	0	0.117559	0.373385	0	-0.112177	0.999232	0	0.219808	0.594397	0	-0.00886653	0.983078	0	-0.0115952	0.992987	0	-0.0693431	0.954236	0	-0.0577479	0.999957	0	-0.10331	0.838219	0	0.228674	0.644132	0	0.331984	0.999975	0
A_23_P128930	NM_002806	NM_002806	5706	proteasome 26S subunit, ATPase 6	PSMC6	-0.00781841	0.979516	0	0.163935	0.389901	0	0.136628	0.394178	0	-0.0497625	0.999232	0	0.351603	0.427007	0	0.253564	0.422614	0	-0.144446	0.848339	0	0.0273072	0.984333	0	0.171753	0.999957	0	-0.303327	0.552944	0	0.0980385	0.888113	0	0.401365	0.999975	0
A_21_P0007250	NR_038903	NR_038903	100506233	RAB30 antisense RNA 1 (head to head)	RAB30-AS1	-0.0614387	0.68468	0	0.0880733	0.506443	0	-0.0271845	0.841339	0	-0.0513641	0.999232	0	0.0731776	0.891617	0	0.142189	0.502915	0	-0.0342542	0.967457	0	0.115258	0.87537	0	0.149512	0.999957	0	-0.193553	0.561427	0	-0.0690114	0.879005	0	0.124542	0.999975	0
A_23_P65466	NM_032846	NM_032846	84932	RAB2B, member RAS oncogene family	RAB2B	0.069326	0.817028	0	0.075772	0.814213	0	0.277808	0.107083	0	0.086846	0.999232	0	0.223147	0.758528	0	-0.198319	0.630024	0	-0.208482	0.809063	0	-0.202036	0.878725	0	0.00644601	0.999957	0	0.285165	0.657134	0	0.421466	0.541874	0	0.136301	0.999975	0
A_23_P97365	NM_018103	NM_018103	55144	leucine rich repeat containing 8 VRAC subunit D	LRRC8D	-0.0197841	0.904812	0	0.0892304	0.459575	0	0.0357658	0.762334	0	-0.0449933	0.999232	0	0.0284974	0.966344	0	0.165389	0.381392	0	-0.0555499	0.924416	0	0.0534646	0.950443	0	0.109014	0.999957	0	-0.210382	0.492086	0	-0.136892	0.71438	0	0.0734907	0.999975	0
A_23_P111297	NM_006638	NM_006638	10799	ribonuclease P/MRP subunit p40	RPP40	0.0681291	0.251624	0	0.007607	0.943533	0	0.0631973	0.180617	0	-0.00147093	0.999232	0	-0.0401582	0.870219	0	0.0817362	0.416424	0	0.00493181	0.992235	0	-0.0555903	0.876296	0	-0.0605221	0.999957	0	-0.0832071	0.622081	0	-0.121894	0.503972	0	-0.0386873	0.999975	0
A_21_P0011842	NM_001135650	NM_001135650	9521	eukaryotic translation elongation factor 1 epsilon 1	EEF1E1	0.00155116	0.995072	0	0.102629	0.443859	0	0.0862818	0.437562	0	-0.0355004	0.999232	0	0.130335	0.746785	0	0.187396	0.375251	0	-0.0847307	0.878707	0	0.0163472	0.987033	0	0.101078	0.999957	0	-0.222896	0.518008	0	-0.0570605	0.906436	0	0.165836	0.999975	0
A_23_P11995	NM_002574	NM_002574	5052	peroxiredoxin 1	PRDX1	0.157236	0.207224	0	0.156961	0.181362	0	0.209917	0.0297571	1	0.0252607	0.999232	0	-0.00712111	0.992262	0	0.354412	0.0656442	0	-0.0526808	0.943511	0	-0.052956	0.959865	0	-0.000275206	0.999957	0	-0.329151	0.341012	0	-0.361533	0.351166	0	-0.0323818	0.999975	0
A_23_P31996	NM_033051	NM_033051	57864	solute carrier family 46 member 2	SLC46A2	-0.200527	0.0586802	0	-0.226428	0.0222659	-1	-0.136924	0.136794	0	-0.0415022	0.999232	0	-0.188695	0.522682	0	0.0783688	0.735211	0	-0.063603	0.912099	0	-0.0895036	0.900547	0	-0.0259006	0.999957	0	-0.119871	0.737108	0	-0.267064	0.455408	0	-0.147193	0.999975	0
A_23_P113825	NM_144653	NM_144653	138151	NACC family member 2	NACC2	-0.0847036	0.521231	0	-0.182218	0.0672836	0	-0.20798	0.0165365	-1	0.130131	0.999232	0	-0.0564163	0.921134	0	-0.0477496	0.845155	0	0.123276	0.772104	0	0.0257611	0.978103	0	-0.0975149	0.999957	0	0.177881	0.5776	0	-0.00866665	0.985768	0	-0.186548	0.999975	0
A_23_P119857	NM_001008237	NM_001008237	130502	tetratricopeptide repeat domain 32	TTC32	0.141429	0.162959	0	0.185089	0.0404341	1	0.11609	0.165297	0	0.0352753	0.999232	0	0.109692	0.744854	0	0.209704	0.205957	0	0.0253393	0.974541	0	0.0689988	0.923924	0	0.0436595	0.999957	0	-0.174428	0.548765	0	-0.100012	0.789747	0	0.0744164	0.999975	0
A_23_P201672	NM_015935	NM_015935	51603	methyltransferase like 13	METTL13	-0.0162883	0.883697	0	-0.0901706	0.216496	0	-0.00724907	0.941546	0	-0.105149	0.999232	0	-0.229619	0.134183	0	-0.0463114	0.76794	0	-0.00903928	0.987152	0	-0.0829215	0.867538	0	-0.0738822	0.999957	0	-0.0588376	0.816524	0	-0.183308	0.438221	0	-0.12447	0.999975	0
A_24_P305038	NR_026905	NR_026905				-0.0465643	0.781801	0	-0.0371526	0.844167	0	-0.109021	0.298174	0	0.0494143	0.999232	0	-0.106504	0.813433	0	0.114922	0.623274	0	0.0624563	0.924416	0	0.071868	0.936341	0	0.00941175	0.999957	0	-0.0655077	0.88253	0	-0.221426	0.578206	0	-0.155918	0.999975	0
A_33_P3224819	NM_001286646	NM_001286646	57210	solute carrier family 45 member 4	SLC45A4	-0.0997839	0.429441	0	-0.171285	0.0905442	0	-0.111208	0.233498	0	-0.0587553	0.999232	0	0.154419	0.6232	0	-0.0233653	0.933936	0	0.0114245	0.989415	0	-0.060077	0.944629	0	-0.0715015	0.999957	0	-0.03539	0.93354	0	0.177785	0.626668	0	0.213175	0.999975	0
A_33_P3415156	DA938875	DA938875				0.0464119	0.787453	0	-0.00529068	0.984685	0	-0.00463725	0.97859	0	0.144345	0.999232	0	-0.0966664	0.847076	0	-0.0601171	0.82503	0	0.0510491	0.947015	0	-0.000653427	0.999851	0	-0.0517025	0.999957	0	0.204462	0.56821	0	-0.0365493	0.943359	0	-0.241012	0.999975	0
A_33_P3410724	NM_003001	NM_003001	6391	succinate dehydrogenase complex subunit C	SDHC	0.0365723	0.775681	0	-0.0942464	0.328069	0	0.0345631	0.729055	0	-0.10289	0.999232	0	-0.20753	0.323786	0	0.0018748	0.995267	0	0.00200923	0.997941	0	-0.128809	0.850038	0	-0.130819	0.999957	0	-0.104764	0.71951	0	-0.209405	0.484957	0	-0.10464	0.999975	0
A_24_P276932	NM_001039362	NM_001039362	245973	ATPase H+ transporting V1 subunit C2	ATP6V1C2	0.0118609	0.943169	0	-0.063106	0.631008	0	-0.0650968	0.509465	0	0.221693	0.999232	0	0.097313	0.7941	0	-0.0738453	0.728882	0	0.0769577	0.867157	0	0.00199082	0.999185	0	-0.0749669	0.999957	0	0.295539	0.313264	0	0.171158	0.622098	0	-0.12438	0.999975	0
A_21_P0011001	NM_004716	NM_004716	9159	proprotein convertase subtilisin/kexin type 7	PCSK7	-0.014218	0.946031	0	0.0154394	0.950798	0	0.0562092	0.681868	0	0.0341941	0.999232	0	0.00903478	0.991567	0	0.0457063	0.881311	0	-0.0704271	0.920099	0	-0.0407698	0.968684	0	0.0296573	0.999957	0	-0.0115122	0.983371	0	-0.0366715	0.94626	0	-0.0251593	0.999975	0
A_21_P0014358	ENST00000583586	ENST00000583586				0.140326	0.269321	0	0.0714237	0.641515	0	-0.247345	0.00932536	-1	0.166498	0.999232	0	-0.000947111	0.99888	0	-0.168414	0.434028	0	0.387671	0.433996	0	0.318769	0.827784	0	-0.0689025	0.999957	0	0.334913	0.324247	0	0.167467	0.683301	0	-0.167445	0.999975	0
A_23_P107744	NM_030760	NM_030760	53637	sphingosine-1-phosphate receptor 5	S1PR5	0.0784001	0.591443	0	-0.00464981	0.98596	0	0.00394515	0.981013	0	0.111444	0.999232	0	-0.12208	0.760319	0	0.0926176	0.693104	0	0.074455	0.892952	0	-0.00859496	0.99312	0	-0.0830499	0.999957	0	0.018826	0.969003	0	-0.214697	0.577313	0	-0.233523	0.999975	0
A_33_P3210379	NM_052863	NM_052863	92304	secretoglobin family 3A member 1	SCGB3A1	0.072661	0.847248	0	-0.050977	0.913243	0	0.148294	0.561427	0	0.0415372	0.999232	0	0.0269827	0.989756	0	-0.706918	0.0887737	0	-0.0756334	0.968258	0	-0.199271	0.907578	0	-0.123638	0.999957	0	0.748455	0.311006	0	0.7339	0.373137	0	-0.0145545	0.999975	0
A_23_P110851	NM_198253	NM_198253	7015	telomerase reverse transcriptase	TERT	-0.0174233	0.918785	0	0.0386809	0.813104	0	-0.0275386	0.825029	0	0.078393	0.999232	0	0.155727	0.607248	0	-0.130605	0.512911	0	0.0101153	0.990078	0	0.0662194	0.935587	0	0.0561041	0.999957	0	0.208998	0.494911	0	0.286332	0.39993	0	0.0773337	0.999975	0
A_23_P103070	NM_003405	NM_003405	7533	tyrosine 3-monooxygenase/tryptophan 5-monooxygenase activation protein eta	YWHAH	-0.158041	0.128258	0	-0.0997448	0.373881	0	-0.0527786	0.620122	0	-0.0675111	0.999232	0	-0.156	0.597945	0	-0.163204	0.37661	0	-0.105262	0.80166	0	-0.0469662	0.958024	0	0.0582962	0.999957	0	0.095693	0.780658	0	0.00720402	0.987733	0	-0.088489	0.999975	0
A_23_P250283	NM_004161	NM_004161	5861	RAB1A, member RAS oncogene family	RAB1A	-0.0679514	0.584801	0	-0.0357366	0.813834	0	-0.0174353	0.888743	0	-0.0248896	0.999232	0	0.0794464	0.842388	0	-0.234338	0.143449	0	-0.050516	0.92584	0	-0.0183013	0.981902	0	0.0322147	0.999957	0	0.209449	0.455237	0	0.313785	0.331554	0	0.104336	0.999975	0
A_33_P3321417	NM_019100	NM_019100	55929	DNA methyltransferase 1 associated protein 1	DMAP1	-0.0710925	0.628249	0	-0.0395832	0.821607	0	-0.0800526	0.452154	0	-0.0338101	0.999232	0	-0.0967177	0.828233	0	-0.0660948	0.787563	0	0.00896009	0.992987	0	0.0404694	0.966988	0	0.0315093	0.999957	0	0.0322847	0.94215	0	-0.0306229	0.94913	0	-0.0629076	0.999975	0
A_33_P3264419	NM_001277813	NM_001277813	253943	YTH N6-methyladenosine RNA binding protein 3	YTHDF3	0.0184597	0.948821	0	0.10866	0.628511	0	0.103139	0.550494	0	-0.157587	0.999232	0	0.266449	0.591187	0	0.163469	0.636234	0	-0.0846791	0.93401	0	0.00552157	0.998796	0	0.0902007	0.999957	0	-0.321055	0.528794	0	0.10298	0.883637	0	0.424035	0.999975	0
A_23_P209933	NM_006464	NM_006464	10618	trans-golgi network protein 2	TGOLN2	-0.123933	0.388701	0	-0.268792	0.0165136	-1	-0.322066	0.00158494	-1	0.00142546	0.999232	0	-0.180704	0.619432	0	-0.00549611	0.989118	0	0.198133	0.708281	0	0.053274	0.961505	0	-0.144859	0.999957	0	0.00692156	0.990284	0	-0.175208	0.68819	0	-0.182129	0.999975	0
A_23_P129058	NM_005154	NM_005154	9101	ubiquitin specific peptidase 8	USP8	-0.11546	0.2931	0	-0.0749807	0.532043	0	0.0387191	0.724164	0	-0.0221463	0.999232	0	0.048921	0.930879	0	-0.131566	0.481219	0	-0.154179	0.712348	0	-0.1137	0.867538	0	0.0404796	0.999957	0	0.10942	0.737108	0	0.180487	0.59382	0	0.0710673	0.999975	0
A_23_P2683	NM_024604	NM_024604	79657	RNA polymerase II associated protein 3	RPAP3	0.0033075	0.980337	0	0.0413676	0.689608	0	0.0583083	0.412894	0	-0.0377558	0.999232	0	0.0561745	0.866397	0	0.0575257	0.717016	0	-0.0550008	0.877846	0	-0.0169407	0.97976	0	0.0380601	0.999957	0	-0.0952815	0.691339	0	-0.00135123	0.996246	0	0.0939303	0.999975	0
A_23_P206441	NM_000135	NM_000135	2175	Fanconi anemia complementation group A	FANCA	-0.000452287	0.998361	0	0.0731224	0.572388	0	-0.110422	0.225395	0	0.0150629	0.999232	0	-0.149844	0.627723	0	-0.16283	0.389831	0	0.10997	0.795169	0	0.183544	0.830643	0	0.0735747	0.999957	0	0.177893	0.56821	0	0.0129867	0.978909	0	-0.164907	0.999975	0
A_21_P0003586	TCONS_00008015	TCONS_00008015				-0.0894814	0.474414	0	-0.0728052	0.568047	0	-0.0410064	0.716638	0	-0.0538966	0.999232	0	-0.108136	0.770636	0	-0.135103	0.484609	0	-0.048475	0.936028	0	-0.0317988	0.969487	0	0.0166762	0.999957	0	0.0812067	0.822546	0	0.0269671	0.952056	0	-0.0542396	0.999975	0
A_23_P108761	NM_017546	NM_017546	55571	CCR4-NOT transcription complex subunit 11	CNOT11	-0.0266608	0.795897	0	-0.000161381	0.99961	0	-0.057655	0.381128	0	0.0524468	0.999232	0	0.036166	0.926163	0	-0.163023	0.172271	0	0.0309942	0.946056	0	0.0574936	0.901578	0	0.0264994	0.999957	0	0.21547	0.298213	0	0.199189	0.389891	0	-0.0162808	0.999975	0
A_33_P3413671	NM_007314	NM_007314	27	ABL proto-oncogene 2, non-receptor tyrosine kinase	ABL2	-0.0277314	0.861621	0	-0.0964751	0.414663	0	-0.141869	0.107101	0	0.0735588	0.999232	0	-0.0343469	0.956901	0	-0.141075	0.474378	0	0.114138	0.789566	0	0.0453942	0.961505	0	-0.0687437	0.999957	0	0.214634	0.485444	0	0.106729	0.790689	0	-0.107906	0.999975	0
A_23_P502641	NM_032970	NM_032970	9117	SEC22 homolog C, vesicle trafficking protein	SEC22C	-0.0890177	0.529454	0	-0.0104408	0.964477	0	-0.010293	0.947665	0	-0.0255321	0.999232	0	-0.0828281	0.87181	0	0.123222	0.577039	0	-0.0787247	0.88368	0	-0.000147824	0.999868	0	0.0785769	0.999957	0	-0.148754	0.677515	0	-0.20605	0.59382	0	-0.0572959	0.999975	0
A_23_P89509	NM_006461	NM_006461	10615	sperm associated antigen 5	SPAG5	-0.0102957	0.967399	0	-0.0699449	0.740441	0	-0.0739624	0.630877	0	-0.206114	0.999232	0	-0.354165	0.301259	0	-0.0149676	0.970175	0	0.0636667	0.946556	0	0.00401745	0.999185	0	-0.0596492	0.999957	0	-0.191146	0.679535	0	-0.339197	0.486726	0	-0.148051	0.999975	0
A_24_P82466	NM_201433	NM_201433	8522	growth arrest specific 7	GAS7	-0.166143	0.197514	0	-0.257991	0.0201721	-1	-0.177424	0.0799187	0	-0.0944123	0.999232	0	-0.186372	0.598384	0	-0.308234	0.124464	0	0.0112811	0.991777	0	-0.0805664	0.930777	0	-0.0918475	0.999957	0	0.213821	0.556294	0	0.121862	0.795703	0	-0.0919593	0.999975	0
A_23_P104689	NM_021975	NM_021975	5970	RELA proto-oncogene, NF-kB subunit	RELA	-0.196186	0.292547	0	-0.102238	0.646738	0	0.0489395	0.801762	0	-0.018176	0.999232	0	-0.145428	0.830162	0	-0.362521	0.205087	0	-0.245125	0.719429	0	-0.151178	0.888161	0	0.0939475	0.999957	0	0.344345	0.485716	0	0.217093	0.720155	0	-0.127252	0.999975	0
A_24_P324314	NM_001008529	NM_001008529	439921	matrix remodeling associated 7	MXRA7	-0.0762247	0.751909	0	0.0883739	0.712176	0	-0.024249	0.912659	0	-0.142627	0.999232	0	0.113458	0.8909	0	-0.00373704	0.995148	0	-0.0519757	0.968235	0	0.112623	0.930847	0	0.164599	0.999957	0	-0.13889	0.816927	0	0.117195	0.865178	0	0.256085	0.999975	0
A_23_P302116	NM_177423	NM_177423	8500	PTPRF interacting protein alpha 1	PPFIA1	-0.203438	0.0211929	-1	-0.228092	0.00575686	-1	-0.225516	0.00293927	-1	0.0071701	0.999232	0	-0.0379146	0.943877	0	-0.269589	0.0757722	0	0.022078	0.977229	0	-0.00257608	0.999185	0	-0.0246541	0.999957	0	0.276759	0.307788	0	0.231674	0.444223	0	-0.0450847	0.999975	0
A_24_P348989	NM_006863	NM_006863	11024	leukocyte immunoglobulin like receptor A1	LILRA1	-0.103544	0.377115	0	-0.0496291	0.731821	0	-0.154505	0.0664497	0	0.134177	0.999232	0	-0.0891878	0.826193	0	-0.133281	0.485776	0	0.0509608	0.932748	0	0.104876	0.87537	0	0.0539151	0.999957	0	0.267458	0.364681	0	0.0440932	0.919135	0	-0.223365	0.999975	0
A_24_P192994	NM_013402	NM_013402	3992	fatty acid desaturase 1	FADS1	-0.0192668	0.900175	0	-0.0731355	0.53572	0	-0.0141324	0.910789	0	0.0399703	0.999232	0	-0.128953	0.671852	0	-0.249489	0.118905	0	-0.00513437	0.995969	0	-0.0590031	0.937066	0	-0.0538687	0.999957	0	0.289459	0.309934	0	0.120536	0.732901	0	-0.168924	0.999975	0
A_23_P141180	NM_001082968	NM_001082968	146691	target of myb1 like 2 membrane trafficking protein	TOM1L2	-0.0436844	0.71438	0	-0.025588	0.857699	0	-0.0320916	0.737901	0	0.0149945	0.999232	0	-0.0204869	0.97287	0	-0.0128435	0.955922	0	-0.0115928	0.985384	0	0.00650358	0.99319	0	0.0180964	0.999957	0	0.0278381	0.9349	0	-0.00764339	0.984907	0	-0.0354814	0.999975	0
A_33_P3352407	A_33_P3352407	A_33_P3352407				-0.0984079	0.595667	0	-0.090419	0.62947	0	-0.0255532	0.889295	0	0.00515207	0.999232	0	-0.0965411	0.888073	0	0.0654188	0.843449	0	-0.0728548	0.930602	0	-0.0648658	0.959709	0	0.00798893	0.999957	0	-0.0602668	0.916215	0	-0.16196	0.761303	0	-0.101693	0.999975	0
A_23_P167595	NM_003337	NM_003337	7320	ubiquitin conjugating enzyme E2 B	UBE2B	-0.0471936	0.807214	0	0.00700772	0.981014	0	0.108963	0.372344	0	0.126579	0.999232	0	0.129621	0.793895	0	-0.106482	0.698923	0	-0.156156	0.769724	0	-0.101955	0.908462	0	0.0542013	0.999957	0	0.233061	0.554181	0	0.236102	0.600942	0	0.00304169	0.999975	0
A_23_P122041	NM_002715	NM_002715	5515	protein phosphatase 2 catalytic subunit alpha	PPP2CA	0.00839356	0.967399	0	0.027082	0.900037	0	0.104139	0.33933	0	-0.0212585	0.999232	0	0.0618777	0.923984	0	-0.0070903	0.984072	0	-0.0957452	0.856713	0	-0.0770567	0.934239	0	0.0186885	0.999957	0	-0.0141682	0.977224	0	0.0689679	0.887033	0	0.0831362	0.999975	0
A_33_P3413989	NM_000062	NM_000062	710	serpin family G member 1	SERPING1	0.0557767	0.904888	0	0.360349	0.23343	0	-0.27146	0.309692	0	-0.0289962	0.999232	0	-0.35107	0.721602	0	-0.0605815	0.938686	0	0.327237	0.786642	0	0.631809	0.827784	0	0.304572	0.999957	0	0.0315853	0.980231	0	-0.290489	0.801725	0	-0.322074	0.999975	0
A_21_P0009187	ENST00000456090	ENST00000456090				0.0868633	0.780783	0	0.202566	0.405788	0	-0.0451582	0.868853	0	0.111674	0.999232	0	0.133425	0.901461	0	-0.368457	0.340197	0	0.132021	0.906499	0	0.247724	0.86851	0	0.115702	0.999957	0	0.48013	0.445337	0	0.501882	0.486726	0	0.0217513	0.999975	0
A_23_P79518	NM_000576	NM_000576	3553	interleukin 1 beta	IL1B	-0.101802	0.604102	0	-0.0828569	0.688744	0	-0.101794	0.488585	0	0.0260697	0.999232	0	0.12026	0.848541	0	-0.0330753	0.934174	0	-8.39101e-06	0.999946	0	0.0189368	0.987989	0	0.0189452	0.999957	0	0.059145	0.921178	0	0.153336	0.791082	0	0.0941905	0.999975	0
A_24_P383330	A_24_P383330	A_24_P383330				0.0596098	0.751741	0	0.102399	0.523318	0	0.190466	0.0864414	0	-0.034803	0.999232	0	0.205345	0.593944	0	0.363738	0.0958727	0	-0.130856	0.82043	0	-0.0880667	0.930847	0	0.0427896	0.999957	0	-0.398541	0.307829	0	-0.158393	0.746267	0	0.240148	0.999975	0
A_33_P3257714	NM_001025	NM_001025	6228	ribosomal protein S23	RPS23	0.0857574	0.582461	0	-0.010732	0.966398	0	0.154492	0.132361	0	-0.0521965	0.999232	0	0.159151	0.679559	0	0.1056	0.671945	0	-0.0687342	0.918013	0	-0.165224	0.850492	0	-0.0964894	0.999957	0	-0.157797	0.680991	0	0.0535504	0.917241	0	0.211347	0.999975	0
A_23_P105465	NM_004072	NM_004072	1240	chemerin chemokine-like receptor 1	CMKLR1	0.033648	0.781028	0	0.0477018	0.675921	0	-0.0571243	0.484779	0	0.0950123	0.999232	0	-0.0852361	0.781923	0	0.0845926	0.613722	0	0.0907723	0.792736	0	0.104826	0.858639	0	0.0140538	0.999957	0	0.0104197	0.976531	0	-0.169829	0.548802	0	-0.180248	0.999975	0
A_23_P117225	NM_000123	NM_000123	2073	ERCC excision repair 5, endonuclease	ERCC5	-0.137694	0.180545	0	-0.158005	0.0912683	0	-0.054167	0.58907	0	-0.208382	0.999232	0	-0.130402	0.669158	0	0.0683452	0.746203	0	-0.0835265	0.846094	0	-0.103838	0.874631	0	-0.0203114	0.999957	0	-0.276727	0.336539	0	-0.198747	0.547914	0	0.0779798	0.999975	0
A_24_P219053	ENST00000497558	ENST00000497558				0.128833	0.245649	0	0.114571	0.285981	0	0.00311514	0.984359	0	0.0580626	0.999232	0	-0.023349	0.974101	0	-0.0521662	0.822942	0	0.125718	0.760448	0	0.111455	0.87402	0	-0.0142624	0.999957	0	0.110229	0.744674	0	0.0288172	0.947627	0	-0.0814117	0.999975	0
A_23_P429020	NM_181786	NM_181786	284459	HKR1, GLI-Kruppel zinc finger family member	HKR1	-0.00886594	0.955153	0	0.0070755	0.971442	0	-0.0226734	0.84225	0	0.0523039	0.999232	0	-0.0138941	0.985163	0	0.134406	0.437949	0	0.0138075	0.984001	0	0.0297489	0.968751	0	0.0159414	0.999957	0	-0.0821025	0.797509	0	-0.1483	0.645834	0	-0.066198	0.999975	0
A_23_P83159	NM_018847	NM_018847	55958	kelch like family member 9	KLHL9	0.151456	0.373837	0	0.165436	0.285813	0	0.187369	0.134188	0	-0.135712	0.999232	0	0.195617	0.671902	0	0.0360055	0.924648	0	-0.035913	0.976348	0	-0.0219337	0.986079	0	0.0139793	0.999957	0	-0.171717	0.720118	0	0.159611	0.774521	0	0.331328	0.999975	0
A_24_P21056	NM_014660	NM_014660	9678	PHD finger protein 14	PHF14	-0.112262	0.295461	0	0.00493271	0.981587	0	-0.0826932	0.352141	0	0.0131742	0.999232	0	-0.00108112	0.998616	0	0.0801221	0.689111	0	-0.0295691	0.968235	0	0.0876259	0.888161	0	0.117195	0.999957	0	-0.0669478	0.84595	0	-0.0812032	0.835337	0	-0.0142554	0.999975	0
A_23_P252758	NM_000420	NM_000420	3792	Kell blood group, metallo-endopeptidase	KEL	0.045038	0.807664	0	0.0374076	0.860103	0	0.111074	0.337148	0	0.142074	0.999232	0	0.240949	0.467473	0	-0.0623427	0.830226	0	-0.066036	0.926653	0	-0.0736665	0.942982	0	-0.00763044	0.999957	0	0.204417	0.595938	0	0.303292	0.472753	0	0.0988751	0.999975	0
A_24_P237757	AL136621	AL136621				-0.0616087	0.62379	0	-0.206691	0.0170357	-1	-0.10269	0.217144	0	-0.161954	0.999232	0	-0.013064	0.986432	0	-0.13044	0.466512	0	0.041081	0.946556	0	-0.104001	0.87402	0	-0.145082	0.999957	0	-0.0315132	0.934072	0	0.117376	0.735007	0	0.14889	0.999975	0
A_23_P113184	NM_001080432	NM_001080432	79068	FTO, alpha-ketoglutarate dependent dioxygenase	FTO	-0.0929552	0.356311	0	-0.148817	0.0737532	0	-0.106757	0.156906	0	-0.0972145	0.999232	0	-0.250371	0.181718	0	-0.116875	0.482149	0	0.013802	0.982652	0	-0.0420596	0.955093	0	-0.0558617	0.999957	0	0.019661	0.958322	0	-0.133496	0.665215	0	-0.153157	0.999975	0
A_21_P0006180	TCONS_00016073	TCONS_00016073				0.0196936	0.904817	0	-0.0387643	0.811986	0	0.057582	0.588486	0	-0.0420526	0.999232	0	-0.149344	0.629523	0	0.0732401	0.743141	0	-0.0378884	0.959175	0	-0.0963462	0.886591	0	-0.0584578	0.999957	0	-0.115293	0.735705	0	-0.222584	0.519857	0	-0.107291	0.999975	0
A_23_P129829	NM_139280	NM_139280	94103	ORMDL sphingolipid biosynthesis regulator 3	ORMDL3	0.0957811	0.794176	0	0.0725081	0.86496	0	0.14297	0.578444	0	0.106468	0.999232	0	0.160955	0.897449	0	-0.671124	0.105486	0	-0.0471885	0.981617	0	-0.0704615	0.972889	0	-0.023273	0.999957	0	0.777591	0.292408	0	0.832078	0.326704	0	0.054487	0.999975	0
A_21_P0012591	NM_001073	NM_001073	10720	UDP glucuronosyltransferase family 2 member B11	UGT2B11	0.152	0.514978	0	0.17349	0.412753	0	0.00131635	0.995699	0	0.0388012	0.999232	0	-0.013452	0.991567	0	-0.00397013	0.995267	0	0.150684	0.856713	0	0.172173	0.887155	0	0.0214897	0.999957	0	0.0427714	0.957845	0	-0.00948187	0.991146	0	-0.0522533	0.999975	0
A_33_P3330264	NM_001511	NM_001511	2919	C-X-C motif chemokine ligand 1	CXCL1	0.0116858	0.951224	0	-0.058711	0.712203	0	-0.0079306	0.961152	0	-0.153029	0.999232	0	0.080078	0.87891	0	0.00236098	0.995267	0	0.0196164	0.981865	0	-0.0507804	0.960021	0	-0.0703967	0.999957	0	-0.15539	0.662128	0	0.077717	0.865258	0	0.233107	0.999975	0
A_23_P65830	NM_198527	NM_198527	374659	HD domain containing 3	HDDC3	0.176726	0.0229073	1	0.122878	0.11976	0	0.140683	0.0366202	1	0.0160721	0.999232	0	0.0722748	0.822797	0	0.327414	0.01471	1	0.0360423	0.94544	0	-0.0178054	0.98042	0	-0.0538477	0.999957	0	-0.311342	0.224503	0	-0.255139	0.345229	0	0.0562027	0.999975	0
A_23_P154199	NM_002712	NM_002712	5510	protein phosphatase 1 regulatory subunit 7	PPP1R7	0.00489402	0.972214	0	0.00361374	0.984674	0	-0.0156954	0.879186	0	0.0137243	0.999232	0	-0.12705	0.585822	0	0.103344	0.504362	0	0.0205894	0.975342	0	0.0193091	0.978402	0	-0.00128028	0.999957	0	-0.0896193	0.737108	0	-0.230394	0.386729	0	-0.140774	0.999975	0
A_32_P456537	NM_030752	NM_030752	6950	t-complex 1	TCP1	-0.118164	0.408531	0	0.0304607	0.886373	0	-0.0436585	0.750164	0	0.0175126	0.999232	0	-0.0830783	0.885204	0	0.1312	0.582101	0	-0.0745053	0.90646	0	0.0741192	0.937066	0	0.148625	0.999957	0	-0.113688	0.782971	0	-0.214279	0.607627	0	-0.100591	0.999975	0
A_23_P397480	NR_003088	NR_003088	150000	ATP binding cassette subfamily C member 13 (pseudogene)	ABCC13	0.154113	0.556893	0	0.0756859	0.816191	0	0.247347	0.161816	0	0.205898	0.999232	0	0.140773	0.885204	0	-0.305965	0.421269	0	-0.0932339	0.942071	0	-0.171661	0.899229	0	-0.0784274	0.999957	0	0.511863	0.394294	0	0.446738	0.517144	0	-0.0651249	0.999975	0
A_21_P0011010	TCONS_l2_00005011	TCONS_l2_00005011				0.00489823	0.980302	0	-0.0389019	0.82517	0	-0.0269929	0.841143	0	-0.00683509	0.999232	0	-0.13811	0.702914	0	-0.0174011	0.953891	0	0.0318912	0.970667	0	-0.011909	0.989311	0	-0.0438001	0.999957	0	0.010566	0.982909	0	-0.120709	0.771427	0	-0.131275	0.999975	0
A_23_P122863	NM_001001555	NM_001001555	2887	growth factor receptor bound protein 10	GRB10	-0.126552	0.383246	0	-0.305164	0.00635933	-1	-0.26491	0.00974497	-1	0.0716549	0.999232	0	0.0685954	0.916677	0	-0.157773	0.509466	0	0.138357	0.786642	0	-0.0402543	0.968684	0	-0.178612	0.999957	0	0.229428	0.536073	0	0.226368	0.596181	0	-0.00305948	0.999975	0
A_24_P372562	NM_175732	NM_175732	114971	protein tyrosine phosphatase, mitochondrial 1	PTPMT1	0.175897	0.0215211	1	0.17563	0.0160803	1	0.137378	0.0383335	1	0.0730105	0.999232	0	0.00114477	0.998553	0	0.343311	0.00978443	1	0.0385188	0.93595	0	0.0382519	0.955238	0	-0.000266954	0.999957	0	-0.2703	0.260422	0	-0.342166	0.248989	0	-0.0718657	0.999975	0
A_21_P0000682	NR_037642	NR_037642	100527964	LHX4 antisense RNA 1	LHX4-AS1	0.0331387	0.816035	0	-0.119982	0.22652	0	-0.108973	0.197395	0	0.141948	0.999232	0	-0.0376043	0.947295	0	-0.0319631	0.895565	0	0.142112	0.719429	0	-0.011009	0.988895	0	-0.153121	0.999957	0	0.173911	0.549232	0	-0.00564115	0.990021	0	-0.179552	0.999975	0
A_23_P216630	NM_080546	NM_080546	23446	solute carrier family 44 member 1	SLC44A1	0.0278027	0.894436	0	0.0842812	0.629312	0	0.0514964	0.728222	0	-0.203453	0.999232	0	0.0591236	0.938495	0	0.0721665	0.808999	0	-0.0236937	0.981617	0	0.0327848	0.977699	0	0.0564785	0.999957	0	-0.27562	0.481086	0	-0.0130429	0.983532	0	0.262577	0.999975	0
A_23_P122937	NM_014800	NM_014800	9844	engulfment and cell motility 1	ELMO1	-0.14444	0.138178	0	-0.18904	0.0303534	-1	-0.124916	0.118778	0	-0.0582151	0.999232	0	-0.149959	0.580783	0	-0.233776	0.136636	0	-0.0195238	0.979833	0	-0.0641243	0.928903	0	-0.0446005	0.999957	0	0.175561	0.532742	0	0.0838172	0.826043	0	-0.091744	0.999975	0
A_23_P82975	NM_181661	NM_181661	157680	vacuolar protein sorting 13 homolog B	VPS13B	-0.0019156	0.993579	0	-0.0551632	0.725734	0	-0.0650674	0.561426	0	-0.0477752	0.999232	0	0.0187622	0.981273	0	0.236136	0.211374	0	0.0631518	0.917396	0	0.00990422	0.991601	0	-0.0532476	0.999957	0	-0.283911	0.376849	0	-0.217373	0.562546	0	0.0665374	0.999975	0
A_33_P3313652	A_33_P3313652	A_33_P3313652				-0.0178434	0.947838	0	0.0606951	0.813017	0	-0.0570843	0.757971	0	0.439152	0.999232	0	0.10584	0.893948	0	0.0785496	0.834327	0	0.039241	0.977145	0	0.117779	0.91913	0	0.0785384	0.999957	0	0.360602	0.447945	0	0.02729	0.97153	0	-0.333312	0.999975	0
A_23_P409626	NM_001079559	NM_001079559	221092	heterogeneous nuclear ribonucleoprotein U like 2	HNRNPUL2	-0.083992	0.481289	0	-0.0407201	0.783372	0	-0.133481	0.102472	0	0.0781622	0.999232	0	-0.194388	0.441887	0	-0.136673	0.45281	0	0.049489	0.930754	0	0.0927608	0.883147	0	0.0432719	0.999957	0	0.214835	0.447948	0	-0.0577151	0.885286	0	-0.27255	0.999975	0
A_23_P415411	NM_003545	NM_003545	8367	histone cluster 1 H4 family member e	HIST1H4E	0.22539	0.188717	0	0.170311	0.329933	0	0.12922	0.396713	0	0.146231	0.999232	0	0.0917656	0.912602	0	0.327849	0.241424	0	0.0961704	0.91157	0	0.041091	0.976081	0	-0.0550794	0.999957	0	-0.181618	0.734056	0	-0.236083	0.681478	0	-0.0544652	0.999975	0
A_23_P166910	NM_015268	NM_015268	23317	DnaJ heat shock protein family (Hsp40) member C13	DNAJC13	-0.0795217	0.487487	0	-0.110722	0.249147	0	-0.126481	0.106218	0	-0.0620523	0.999232	0	-0.188453	0.433498	0	-0.152473	0.364568	0	0.0469593	0.931849	0	0.0157593	0.982814	0	-0.0312	0.999957	0	0.0904203	0.772873	0	-0.0359808	0.927227	0	-0.126401	0.999975	0
A_23_P111701	NM_004126	NM_004126	2791	G protein subunit gamma 11	GNG11	0.128379	0.589691	0	0.0567535	0.850887	0	0.360914	0.016732	1	0.0941568	0.999232	0	0.0403949	0.974996	0	-0.111139	0.785399	0	-0.232536	0.75339	0	-0.304161	0.835508	0	-0.071625	0.999957	0	0.205296	0.734376	0	0.151534	0.837567	0	-0.0537619	0.999975	0
A_23_P41204	NM_144635	NM_144635	131408	family with sequence similarity 131 member A	FAM131A	-0.103261	0.447216	0	-0.0669019	0.656157	0	0.0623742	0.588585	0	0.0900111	0.999232	0	-0.0788697	0.880379	0	0.024022	0.93613	0	-0.165636	0.716962	0	-0.129276	0.867538	0	0.0363594	0.999957	0	0.065989	0.875311	0	-0.102892	0.817418	0	-0.168881	0.999975	0
A_23_P100499	NM_024589	NM_024589	79641	rogdi homolog	ROGDI	-0.00374129	0.986175	0	0.065837	0.667218	0	0.0663551	0.564509	0	0.0797649	0.999232	0	0.227072	0.441887	0	0.203379	0.31079	0	-0.0700964	0.906241	0	-0.000518137	0.999851	0	0.0695783	0.999957	0	-0.123614	0.742035	0	0.0236926	0.963234	0	0.147307	0.999975	0
A_33_P3294222	NM_001013838	NM_001013838	146206	capping protein regulator and myosin 1 linker 2	CARMIL2	-0.0996122	0.518174	0	-0.0364955	0.860103	0	-0.127559	0.242652	0	-0.129779	0.999232	0	-0.0191332	0.98363	0	0.0765586	0.778272	0	0.0279467	0.978845	0	0.0910634	0.914937	0	0.0631166	0.999957	0	-0.206338	0.580912	0	-0.0956918	0.849317	0	0.110646	0.999975	0
A_23_P115316	NM_022371	NM_022371	64222	torsin family 3 member A	TOR3A	0.0329745	0.795743	0	0.126844	0.138753	0	0.0537407	0.539597	0	-0.0199019	0.999232	0	0.02032	0.973776	0	0.244376	0.0895463	0	-0.0207662	0.977229	0	0.0731037	0.899229	0	0.0938699	0.999957	0	-0.264278	0.303912	0	-0.224056	0.436194	0	0.0402219	0.999975	0
A_32_P147078	NM_021097	NM_021097	6546	solute carrier family 8 member A1	SLC8A1	0.0269337	0.897955	0	-0.00739215	0.980584	0	-0.0813474	0.540724	0	0.157405	0.999232	0	0.354482	0.209991	0	-0.0317893	0.926665	0	0.108281	0.854709	0	0.0739552	0.945456	0	-0.0343259	0.999957	0	0.189195	0.648182	0	0.386272	0.37234	0	0.197077	0.999975	0
A_23_P365614	NM_004557	NM_004557	4855	notch 4	NOTCH4	0.118586	0.315195	0	-0.012534	0.952643	0	-0.0365616	0.760341	0	0.250404	0.999232	0	-0.125901	0.719241	0	0.101714	0.631392	0	0.155147	0.717107	0	0.0240276	0.979667	0	-0.13112	0.999957	0	0.14869	0.652668	0	-0.227615	0.518296	0	-0.376305	0.999975	0
A_32_P98298	NM_004420	NM_004420	1850	dual specificity phosphatase 8	DUSP8	0.13262	0.381876	0	0.145654	0.289269	0	0.01432	0.936412	0	0.124536	0.999232	0	-0.134106	0.780776	0	-0.00109107	0.998089	0	0.1183	0.839943	0	0.131334	0.876296	0	0.0130343	0.999957	0	0.125627	0.775392	0	-0.133015	0.791369	0	-0.258643	0.999975	0
A_21_P0009950	TCONS_00028131	TCONS_00028131				0.160562	0.384386	0	-0.0935413	0.661299	0	0.075466	0.656582	0	0.0248561	0.999232	0	0.164247	0.777843	0	-0.556888	0.0331953	-1	0.0850964	0.924416	0	-0.169007	0.874631	0	-0.254104	0.999957	0	0.581744	0.246464	0	0.721134	0.247966	0	0.139391	0.999975	0
A_32_P176911	NR_026774	NR_026774	145200	long intergenic non-protein coding RNA 239	LINC00239	0.183883	0.227805	0	0.187471	0.18741	0	0.185989	0.120932	0	0.0853866	0.999232	0	-0.199673	0.641041	0	0.285144	0.244485	0	-0.00210596	0.997941	0	0.001482	0.999794	0	0.00358795	0.999957	0	-0.199758	0.653204	0	-0.484817	0.315332	0	-0.285059	0.999975	0
A_33_P3325671	ENST00000508239	ENST00000508239				-0.0191899	0.923037	0	-0.0992235	0.485071	0	-0.0216934	0.889064	0	-0.1399	0.999232	0	-0.106419	0.826193	0	-0.0973748	0.69958	0	0.00250357	0.997941	0	-0.0775301	0.935432	0	-0.0800337	0.999957	0	-0.0425253	0.929382	0	-0.00904392	0.986572	0	0.0334814	0.999975	0
A_33_P3272117	NM_024083	NM_024083	79058	ASPSCR1, UBX domain containing tether for SLC2A4	ASPSCR1	-0.0720774	0.683187	0	0.0779518	0.653124	0	-0.0771331	0.557212	0	-0.042506	0.999232	0	0.0856178	0.891617	0	0.0755202	0.792957	0	0.00505573	0.996805	0	0.155085	0.865217	0	0.150029	0.999957	0	-0.118026	0.790464	0	0.0100976	0.986371	0	0.128124	0.999975	0
A_24_P309360	NM_020123	NM_020123	56889	transmembrane 9 superfamily member 3	TM9SF3	-0.020748	0.908718	0	0.0485872	0.776437	0	0.0857825	0.425732	0	-0.15078	0.999232	0	0.177486	0.586349	0	-0.00299575	0.993836	0	-0.106531	0.830147	0	-0.0371953	0.968684	0	0.0693352	0.999957	0	-0.147784	0.681251	0	0.180482	0.645834	0	0.328265	0.999975	0
A_23_P142255	NM_020209	NM_020209	56961	Src homology 2 domain containing transforming protein D	SHD	0.13669	0.562609	0	0.0155443	0.968462	0	-0.114475	0.536942	0	-0.171091	0.999232	0	-0.0257692	0.986276	0	-0.042329	0.931227	0	0.251166	0.738914	0	0.13002	0.925485	0	-0.121146	0.999957	0	-0.128762	0.845278	0	0.0165597	0.984907	0	0.145321	0.999975	0
A_33_P3263696	NM_001205119	NM_001205119	9776	autophagy related 13	ATG13	-0.168634	0.181511	0	-0.0062759	0.981277	0	0.0109063	0.947724	0	0.0802199	0.999232	0	-0.0316974	0.969376	0	-0.162473	0.472857	0	-0.17954	0.71538	0	-0.0171822	0.986784	0	0.162358	0.999957	0	0.242693	0.492264	0	0.130775	0.772053	0	-0.111917	0.999975	0
A_24_P172990	NM_001605	NM_001605	16	alanyl-tRNA synthetase	AARS	-0.280189	0.0139385	-1	-0.148801	0.222609	0	-0.119829	0.262006	0	-0.138172	0.999232	0	-0.160994	0.666824	0	0.0349215	0.90851	0	-0.16036	0.742873	0	-0.0289727	0.978128	0	0.131388	0.999957	0	-0.173093	0.645023	0	-0.195916	0.637516	0	-0.0228227	0.999975	0
A_23_P332374	NM_007147	NM_007147	7728	zinc finger protein 175	ZNF175	0.0157463	0.928555	0	0.0468085	0.768618	0	0.178071	0.0429609	1	0.113977	0.999232	0	0.0392566	0.949964	0	0.107239	0.613722	0	-0.162325	0.712348	0	-0.131262	0.862577	0	0.0310622	0.999957	0	0.00673809	0.988791	0	-0.0679823	0.876127	0	-0.0747204	0.999975	0
A_24_P280706	NM_006704	NM_006704	10910	SGT1 homolog, MIS12 kinetochore complex assembly cochaperone	SUGT1	-0.0192615	0.904888	0	0.0614208	0.651748	0	-0.0550134	0.601474	0	0.145532	0.999232	0	0.0725662	0.877732	0	-0.000504864	0.998622	0	0.035752	0.960549	0	0.116434	0.86851	0	0.0806823	0.999957	0	0.146036	0.647765	0	0.073071	0.858946	0	-0.0729654	0.999975	0
A_23_P64083	NM_006842	NM_006842	10992	splicing factor 3b subunit 2	SF3B2	-0.338012	0.0117214	-1	-0.299405	0.0188916	-1	-0.243536	0.0350334	-1	-0.222927	0.999232	0	-0.332933	0.311959	0	-0.12691	0.655296	0	-0.0944758	0.887644	0	-0.0558688	0.966283	0	0.038607	0.999957	0	-0.0960169	0.848121	0	-0.206023	0.677185	0	-0.110006	0.999975	0
A_23_P122007	NM_033211	NM_033211	90355	chromosome 5 open reading frame 30	C5orf30	0.0384714	0.767376	0	0.0158204	0.927721	0	0.112501	0.148332	0	-0.0417334	0.999232	0	0.090548	0.790117	0	0.0683209	0.724729	0	-0.0740295	0.854828	0	-0.0966805	0.874631	0	-0.022651	0.999957	0	-0.110054	0.709233	0	0.0222272	0.955976	0	0.132281	0.999975	0
A_32_P22338	NM_013374	NM_013374	10015	programmed cell death 6 interacting protein	PDCD6IP	-0.0982974	0.369061	0	-0.0797276	0.471862	0	-0.205107	0.00849154	-1	0.0277112	0.999232	0	-0.198567	0.415947	0	-0.0385166	0.863109	0	0.10681	0.78023	0	0.125379	0.850492	0	0.0185698	0.999957	0	0.0662277	0.844632	0	-0.160051	0.625381	0	-0.226279	0.999975	0
A_24_P207150	NM_130839	NM_130839	7337	ubiquitin protein ligase E3A	UBE3A	0.0481413	0.760937	0	0.114367	0.342273	0	0.109161	0.27092	0	-0.015793	0.999232	0	0.0550901	0.930455	0	0.251779	0.178467	0	-0.0610199	0.922701	0	0.00520626	0.997649	0	0.0662262	0.999957	0	-0.267572	0.409034	0	-0.196689	0.605848	0	0.0708831	0.999975	0
A_21_P0000083	NM_004366	NM_004366	1181	chloride voltage-gated channel 2	CLCN2	0.0385338	0.751622	0	-0.0749133	0.449819	0	-0.0163208	0.882286	0	0.0964703	0.999232	0	0.0704115	0.843538	0	-0.130919	0.405141	0	0.0548547	0.89908	0	-0.0585924	0.928903	0	-0.113447	0.999957	0	0.227389	0.363588	0	0.201331	0.483617	0	-0.0260587	0.999975	0
A_24_P12065	NM_004354	NM_004354	901	cyclin G2	CCNG2	-0.125396	0.279572	0	-0.0205341	0.917336	0	0.035438	0.768953	0	0.0360956	0.999232	0	0.074518	0.87891	0	0.044317	0.858558	0	-0.160834	0.712348	0	-0.0559721	0.947664	0	0.104862	0.999957	0	-0.00822138	0.985949	0	0.030201	0.946758	0	0.0384224	0.999975	0
A_24_P383523	NM_015589	NM_015589	23034	sterile alpha motif domain containing 4A	SAMD4A	0.178161	0.405453	0	0.276895	0.117349	0	0.0354158	0.878806	0	0.275579	0.999232	0	-0.186995	0.780973	0	0.202823	0.568063	0	0.142745	0.861205	0	0.241479	0.850492	0	0.098734	0.999957	0	0.072756	0.919933	0	-0.389818	0.523291	0	-0.462574	0.999975	0
A_33_P3703501	NM_198321	NM_198321	55568	polypeptide N-acetylgalactosaminyltransferase 10	GALNT10	0.00030479	0.998442	0	-0.102214	0.299963	0	-0.0374973	0.71499	0	0.196896	0.999232	0	-0.0513748	0.916501	0	-0.215066	0.171613	0	0.0378021	0.950683	0	-0.0647169	0.927136	0	-0.102519	0.999957	0	0.411961	0.173952	0	0.163691	0.608978	0	-0.248271	0.999975	0
A_23_P158297	NM_197975	NM_197975	10917	butyrophilin like 3	BTNL3	0.0752564	0.877986	0	-0.401897	0.211785	0	-0.0523121	0.896778	0	0.0411189	0.999232	0	-0.00220485	0.999411	0	-0.0970961	0.903552	0	0.127568	0.951471	0	-0.349585	0.873679	0	-0.477153	0.999957	0	0.138215	0.91239	0	0.0948912	0.945354	0	-0.0433237	0.999975	0
A_23_P85726	NM_033418	NM_033418	92342	methyltransferase like 18	METTL18	0.0321847	0.839862	0	0.0223848	0.90947	0	0.169506	0.0559387	0	-0.0145823	0.999232	0	0.0267282	0.971765	0	0.284862	0.105475	0	-0.137322	0.748068	0	-0.147121	0.850492	0	-0.00979989	0.999957	0	-0.299444	0.341199	0	-0.258134	0.466225	0	0.0413105	0.999975	0
A_33_P3380751	NM_003034	NM_003034	6489	ST8 alpha-N-acetyl-neuraminide alpha-2,8-sialyltransferase 1	ST8SIA1	-0.0399362	0.826219	0	0.0022928	0.993929	0	-0.0281258	0.85313	0	0.095433	0.999232	0	-0.0303786	0.97257	0	0.00670811	0.985931	0	-0.0118104	0.990559	0	0.0304186	0.977454	0	0.042229	0.999957	0	0.0887249	0.839276	0	-0.0370867	0.944679	0	-0.125812	0.999975	0
A_23_P102037	NM_025147	NM_025147	80219	coenzyme Q10B	COQ10B	-0.0426627	0.766255	0	-0.0081138	0.969778	0	0.0708154	0.467195	0	0.0136977	0.999232	0	0.0560064	0.914818	0	0.013831	0.95972	0	-0.113478	0.78023	0	-0.0789292	0.908064	0	0.0345489	0.999957	0	-0.000133208	0.99959	0	0.0421755	0.921327	0	0.0423087	0.999975	0
A_23_P250455	NM_006044	NM_006044	10013	histone deacetylase 6	HDAC6	-0.151481	0.0897122	0	-0.138845	0.107822	0	-0.0892882	0.26359	0	-0.0811161	0.999232	0	-0.161213	0.50394	0	-0.159542	0.314536	0	-0.0621929	0.88368	0	-0.0495565	0.946046	0	0.0126364	0.999957	0	0.0784259	0.799033	0	-0.00167113	0.996246	0	-0.080097	0.999975	0
A_23_P116765	NM_002289	NM_002289	3906	lactalbumin alpha	LALBA	0.0623515	0.885579	0	0.200354	0.563988	0	0.0736948	0.825899	0	0.202313	0.999232	0	0.0354363	0.987881	0	-0.477863	0.338057	0	-0.0113433	0.996805	0	0.126659	0.959709	0	0.138002	0.999957	0	0.680176	0.405137	0	0.5133	0.592864	0	-0.166877	0.999975	0
A_23_P152995	NM_001045	NM_001045	6532	solute carrier family 6 member 4	SLC6A4	-0.0686653	0.428071	0	-0.122131	0.0754649	0	-0.0660827	0.315937	0	-0.0206744	0.999232	0	-0.103405	0.636441	0	-0.24726	0.0373028	-1	-0.00258261	0.997055	0	-0.0560484	0.909243	0	-0.0534658	0.999957	0	0.226585	0.291686	0	0.143855	0.559663	0	-0.0827307	0.999975	0
A_23_P74547	NM_001040033	NM_001040033	963	CD53 molecule	CD53	-0.315429	0.0211929	-1	-0.119334	0.476684	0	-0.0168394	0.930876	0	-0.131604	0.999232	0	-0.0877271	0.902082	0	0.210384	0.427254	0	-0.298589	0.685006	0	-0.102495	0.921235	0	0.196094	0.999957	0	-0.341988	0.412319	0	-0.298111	0.536861	0	0.0438771	0.999975	0
A_23_P149818	NM_080599	NM_080599	26019	UPF2, regulator of nonsense mediated mRNA decay	UPF2	-0.0468028	0.744488	0	-0.0917194	0.426075	0	-0.17483	0.0367622	-1	0.0130301	0.999232	0	-0.168806	0.545531	0	-0.0526229	0.819432	0	0.128027	0.75339	0	0.0831107	0.90086	0	-0.0449166	0.999957	0	0.065653	0.857682	0	-0.116183	0.758762	0	-0.181836	0.999975	0
A_32_P175934	NM_001778	NM_001778	962	CD48 molecule	CD48	0.158879	0.38323	0	0.302475	0.0373936	1	0.0981247	0.530994	0	-0.0247506	0.999232	0	0.260145	0.546207	0	0.304105	0.264004	0	0.0607542	0.952771	0	0.204351	0.851076	0	0.143597	0.999957	0	-0.328855	0.472467	0	-0.0439592	0.947924	0	0.284896	0.999975	0
A_33_P3270926	XR_110088	XR_110088				0.0121779	0.939675	0	0.0305063	0.844288	0	0.0326328	0.765558	0	0.078421	0.999232	0	0.00781677	0.991567	0	0.0645904	0.755845	0	-0.0204549	0.979737	0	-0.00212646	0.999185	0	0.0183284	0.999957	0	0.0138306	0.972551	0	-0.0567736	0.885286	0	-0.0706042	0.999975	0
A_24_P109432	NM_001114132	NM_001114132	65065	neurobeachin like 1	NBEAL1	0.0437317	0.72601	0	-0.021151	0.893473	0	-0.00202765	0.988562	0	0.0333108	0.999232	0	0.131411	0.614429	0	0.0319217	0.882305	0	0.0457594	0.927913	0	-0.0191233	0.980608	0	-0.0648827	0.999957	0	0.00138915	0.997902	0	0.0994894	0.763252	0	0.0981002	0.999975	0
A_33_P3341329	NM_033114	NM_033114	85437	zinc finger CCHC-type and RNA binding motif containing 1	ZCRB1	0.172231	0.0453821	1	0.0621066	0.576983	0	0.138472	0.0598286	0	0.0543281	0.999232	0	-0.0229924	0.969662	0	0.158311	0.312798	0	0.0337589	0.954327	0	-0.0763656	0.894286	0	-0.110125	0.999957	0	-0.103983	0.719131	0	-0.181303	0.546785	0	-0.0773205	0.999975	0
A_21_P0000885	NR_040027	NR_040027	284408	ZNF790 antisense RNA 1	ZNF790-AS1	-0.00378358	0.983844	0	-0.0336955	0.839966	0	-0.0416755	0.712989	0	-0.0553196	0.999232	0	0.232129	0.351706	0	0.16142	0.390048	0	0.0378919	0.958273	0	0.00798	0.993071	0	-0.0299119	0.999957	0	-0.216739	0.47063	0	0.0707093	0.865181	0	0.287449	0.999975	0
A_23_P161719	NM_152434	NM_152434	143884	CWF19 like 2, cell cycle control (S. pombe)	CWF19L2	0.122573	0.405453	0	0.0398189	0.84574	0	0.137094	0.21003	0	-0.0653223	0.999232	0	0.111225	0.82411	0	0.245785	0.258224	0	-0.0145219	0.988112	0	-0.0972756	0.908337	0	-0.0827537	0.999957	0	-0.311107	0.394526	0	-0.13456	0.778116	0	0.176547	0.999975	0
A_33_P3227944	NR_026906	NR_026906	147081	long intergenic non-protein coding RNA 2210	LINC02210	0.186353	0.236759	0	-0.055999	0.806314	0	0.114257	0.406307	0	0.00038922	0.999672	0	0.0741214	0.927916	0	-0.0340221	0.929748	0	0.0720967	0.93401	0	-0.170256	0.867538	0	-0.242352	0.999957	0	0.0344113	0.95593	0	0.108144	0.855126	0	0.0737322	0.999975	0
A_32_P114284	NM_001079526	NM_001079526	22807	IKAROS family zinc finger 2	IKZF2	0.125129	0.554506	0	0.180328	0.307556	0	0.33805	0.0132503	1	-0.0816722	0.999232	0	0.363092	0.38275	0	0.305343	0.295837	0	-0.212921	0.748068	0	-0.157722	0.884924	0	0.0551988	0.999957	0	-0.387015	0.426199	0	0.057749	0.935272	0	0.444764	0.999975	0
A_24_P169048	NR_001450	NR_001450	10737	RFPL3 antisense	RFPL3S	-0.0290134	0.801933	0	0.0189827	0.892583	0	-0.00208399	0.986953	0	0.0116387	0.999232	0	0.113161	0.632131	0	0.00770247	0.971445	0	-0.0269294	0.961896	0	0.0210667	0.974101	0	0.0479961	0.999957	0	0.00393622	0.990834	0	0.105458	0.70948	0	0.101522	0.999975	0
A_23_P252082	NM_018487	NM_018487	55365	transmembrane protein 176A	TMEM176A	-0.0336015	0.870872	0	0.0467623	0.828223	0	-0.119092	0.333753	0	-0.0933332	0.999232	0	-0.163688	0.716896	0	0.124486	0.648756	0	0.0854908	0.901152	0	0.165855	0.864148	0	0.0803637	0.999957	0	-0.217819	0.595938	0	-0.288174	0.523291	0	-0.0703546	0.999975	0
A_23_P110196	NM_016323	NM_016323	51191	HECT and RLD domain containing E3 ubiquitin protein ligase 5	HERC5	-0.0211851	0.966847	0	0.457237	0.107275	0	-0.041104	0.914481	0	0.1479	0.999232	0	-0.316972	0.763619	0	0.0541568	0.945189	0	0.0199189	0.994831	0	0.498341	0.835508	0	0.478422	0.999957	0	0.0937433	0.936284	0	-0.371129	0.728474	0	-0.464872	0.999975	0
A_23_P12329	NM_016022	NM_016022	51107	aph-1 homolog A, gamma-secretase subunit	APH1A	0.0163192	0.946991	0	0.0462095	0.847271	0	-0.0434023	0.799278	0	0.0290627	0.999232	0	-0.0471186	0.957821	0	0.171374	0.54683	0	0.0597214	0.950683	0	0.0896118	0.937066	0	0.0298904	0.999957	0	-0.142311	0.773174	0	-0.218492	0.671681	0	-0.0761813	0.999975	0
A_24_P329635	NM_000368	NM_000368	7248	TSC complex subunit 1	TSC1	-0.112613	0.1927	0	-0.15459	0.0415433	-1	-0.155999	0.0200543	-1	-0.0879992	0.999232	0	-0.110493	0.663444	0	-0.159474	0.259647	0	0.0433863	0.925002	0	0.001409	0.999246	0	-0.0419773	0.999957	0	0.071475	0.799046	0	0.0489814	0.883834	0	-0.0224936	0.999975	0
A_32_P224234	AK123450	AK123450				0.120704	0.505533	0	-0.0326411	0.90255	0	0.140485	0.282966	0	-0.0254793	0.999232	0	0.0774148	0.921556	0	-0.220412	0.411375	0	-0.0197815	0.985384	0	-0.173126	0.866324	0	-0.153345	0.999957	0	0.194932	0.67218	0	0.297826	0.547694	0	0.102894	0.999975	0
A_33_P3221114	NM_144720	NM_144720	152789	janus kinase and microtubule interacting protein 1	JAKMIP1	0.0329122	0.83679	0	-0.0170433	0.933804	0	0.0244989	0.853755	0	0.0127032	0.999232	0	0.0288765	0.967995	0	0.240794	0.186141	0	0.00841338	0.993535	0	-0.0415421	0.966283	0	-0.0499555	0.999957	0	-0.228091	0.467142	0	-0.211918	0.562546	0	0.0161733	0.999975	0
A_33_P3359160	NM_001267608	NM_001267608	10712	family with sequence similarity 189 member B	FAM189B	-0.0306315	0.805294	0	-0.0608262	0.562792	0	-0.126255	0.0739085	0	-0.0519171	0.999232	0	-0.151594	0.505689	0	-0.0475518	0.800949	0	0.0956231	0.78023	0	0.0654285	0.908907	0	-0.0301946	0.999957	0	-0.00436529	0.990629	0	-0.104043	0.736068	0	-0.0996773	0.999975	0
A_23_P411113	NM_003632	NM_003632	8506	contactin associated protein 1	CNTNAP1	0.15683	0.665153	0	0.00713471	0.99015	0	0.128111	0.654611	0	0.0587553	0.999232	0	-0.0537232	0.979174	0	-0.30407	0.559393	0	0.0287196	0.989415	0	-0.120976	0.959865	0	-0.149696	0.999957	0	0.362826	0.668076	0	0.250347	0.813119	0	-0.112479	0.999975	0
A_23_P39561	NM_080678	NM_080678	140739	ubiquitin conjugating enzyme E2 F (putative)	UBE2F	0.10886	0.361167	0	0.153168	0.13117	0	0.157988	0.0670373	0	0.136728	0.999232	0	0.158896	0.60022	0	0.0950203	0.652271	0	-0.0491286	0.936028	0	-0.00482024	0.997668	0	0.0443083	0.999957	0	0.0417075	0.919704	0	0.0638754	0.880236	0	0.0221679	0.999975	0
A_33_P3324890	A_33_P3324890	A_33_P3324890				-0.230259	0.045645	-1	-0.0743718	0.633799	0	-0.121331	0.248785	0	0.0176511	0.999232	0	-0.200626	0.539532	0	-0.294883	0.134253	0	-0.108928	0.83593	0	0.0469588	0.966283	0	0.155887	0.999957	0	0.312534	0.365855	0	0.0942569	0.844421	0	-0.218277	0.999975	0
A_23_P77568	NM_001037808	NM_001037808	8663	eukaryotic translation initiation factor 3 subunit C	EIF3C	-0.14394	0.208309	0	-0.189919	0.0609096	0	-0.12256	0.188746	0	-0.189007	0.999232	0	-0.362997	0.101628	0	-0.103167	0.634114	0	-0.0213799	0.980418	0	-0.0673592	0.936034	0	-0.0459793	0.999957	0	-0.0858404	0.821441	0	-0.259831	0.466223	0	-0.17399	0.999975	0
A_23_P145777	NM_002489	NM_002489	4697	NDUFA4, mitochondrial complex associated	NDUFA4	0.446459	0.0482981	1	0.579236	0.00521926	1	0.406109	0.0343083	1	-0.0700654	0.999232	0	0.198751	0.833913	0	0.643931	0.0916483	0	0.0403496	0.981865	0	0.173127	0.913414	0	0.132777	0.999957	0	-0.713996	0.294218	0	-0.44518	0.57497	0	0.268816	0.999975	0
A_33_P3283420	NM_203390	NM_203390	389677	RNA binding motif protein 12B	RBM12B	0.0367128	0.813165	0	0.0983767	0.412812	0	-0.035604	0.769662	0	0.182893	0.999232	0	0.107502	0.782416	0	0.187407	0.319619	0	0.0723168	0.886871	0	0.133981	0.858639	0	0.0616639	0.999957	0	-0.0045135	0.992455	0	-0.0799047	0.853642	0	-0.0753912	0.999975	0
A_23_P116387	NM_001040694	NM_001040694	3619	inner centromere protein	INCENP	-0.0476279	0.652957	0	-0.0914713	0.267432	0	-0.15266	0.018597	-1	-0.0656623	0.999232	0	-0.130439	0.549785	0	-0.280197	0.0306953	-1	0.105032	0.745119	0	0.0611886	0.908462	0	-0.0438435	0.999957	0	0.214535	0.354144	0	0.149758	0.579521	0	-0.0647772	0.999975	0
A_23_P203173	NM_001558	NM_001558	3587	interleukin 10 receptor subunit alpha	IL10RA	-0.0722201	0.615949	0	0.000873998	0.997545	0	-0.0607575	0.589043	0	-0.112857	0.999232	0	-0.100255	0.813433	0	0.0028533	0.993915	0	-0.0114625	0.989415	0	0.0616315	0.944629	0	0.0730941	0.999957	0	-0.11571	0.75089	0	-0.103108	0.811825	0	0.0126022	0.999975	0
A_24_P179351	NM_003295	NM_003295	7178	tumor protein, translationally-controlled 1	TPT1	0.235899	0.414756	0	0.39753	0.0891986	0	0.393895	0.052193	0	-0.167839	0.999232	0	0.522364	0.394784	0	0.942176	0.0202127	1	-0.157996	0.897863	0	0.00363483	0.999342	0	0.16163	0.999957	0	-1.11002	0.172177	0	-0.419813	0.622013	0	0.690203	0.999975	0
A_23_P115137	NM_006402	NM_006402	10542	late endosomal/lysosomal adaptor, MAPK and MTOR activator 5	LAMTOR5	0.0556989	0.674943	0	0.0410733	0.783591	0	0.1565	0.0544536	0	-0.010481	0.999232	0	0.101081	0.779358	0	0.238603	0.143106	0	-0.100801	0.805992	0	-0.115427	0.867538	0	-0.0146256	0.999957	0	-0.249084	0.383753	0	-0.137522	0.691936	0	0.111562	0.999975	0
A_33_P3230788	ENST00000374440	ENST00000374440				0.113863	0.54776	0	0.0568508	0.808511	0	-0.0261785	0.891391	0	0.0745508	0.999232	0	0.0205634	0.986415	0	0.0773434	0.820242	0	0.140041	0.831203	0	0.0830292	0.946046	0	-0.0570122	0.999957	0	-0.00279265	0.997021	0	-0.05678	0.928998	0	-0.0539874	0.999975	0
A_23_P103864	NM_024525	NM_024525	79573	tetratricopeptide repeat domain 13	TTC13	0.0652617	0.590056	0	-0.0221532	0.894397	0	0.0338383	0.748131	0	0.0207935	0.999232	0	0.026416	0.965778	0	0.110467	0.542567	0	0.0314235	0.963291	0	-0.0559915	0.939252	0	-0.087415	0.999957	0	-0.089674	0.775526	0	-0.0840515	0.822951	0	0.00562258	0.999975	0
A_23_P11025	NM_001178106	NM_001178106	7739	zinc finger protein 185 with LIM domain	ZNF185	-0.20132	0.0535862	0	-0.172175	0.0927834	0	0.00739365	0.961446	0	-0.0395502	0.999232	0	-0.130766	0.714766	0	-0.0324609	0.904479	0	-0.208713	0.685006	0	-0.179569	0.835508	0	0.0291447	0.999957	0	-0.00708934	0.987904	0	-0.0983051	0.816728	0	-0.0912158	0.999975	0
A_33_P3352382	NM_001244438	NM_001244438	383	arginase 1	ARG1	0.123601	0.573529	0	-0.229367	0.181362	0	0.0377303	0.859335	0	-0.0879361	0.999232	0	0.188924	0.752712	0	-0.127564	0.726097	0	0.0858706	0.933233	0	-0.267097	0.837494	0	-0.352968	0.999957	0	0.0396275	0.957074	0	0.316487	0.589602	0	0.27686	0.999975	0
A_33_P3358908	NM_001277331	NM_001277331	100507608	keratin associated protein 9-6	KRTAP9-6	0.112521	0.400137	0	0.0934921	0.486994	0	-0.0207764	0.888272	0	0.0880548	0.999232	0	0.11257	0.792946	0	-0.151294	0.482759	0	0.133297	0.772104	0	0.114269	0.876296	0	-0.0190289	0.999957	0	0.239349	0.472474	0	0.263865	0.487647	0	0.0245156	0.999975	0
A_21_P0006548	TCONS_00017366	TCONS_00017366				0.130744	0.180545	0	-0.0199942	0.906431	0	0.0111485	0.929692	0	0.0450759	0.999232	0	-0.0649846	0.881065	0	0.0468118	0.825148	0	0.119596	0.748068	0	-0.0311427	0.968684	0	-0.150738	0.999957	0	-0.00173589	0.997021	0	-0.111796	0.743949	0	-0.11006	0.999975	0
A_33_P3317387	BC033823	BC033823				0.00142334	0.995094	0	-0.146225	0.183631	0	-0.0981837	0.326279	0	0.211237	0.999232	0	0.0756071	0.884085	0	-0.0313968	0.910134	0	0.099607	0.839282	0	-0.0480417	0.961505	0	-0.147649	0.999957	0	0.242633	0.447948	0	0.107004	0.803375	0	-0.135629	0.999975	0
A_19_P00329711	NM_020746	NM_020746	57506	mitochondrial antiviral signaling protein	MAVS	0.0119115	0.957067	0	-0.0179816	0.943809	0	-0.049105	0.737322	0	-0.145369	0.999232	0	0.021412	0.982302	0	-0.0826302	0.773319	0	0.0610165	0.936739	0	0.0311233	0.978402	0	-0.0298932	0.999957	0	-0.0627384	0.902447	0	0.104042	0.843696	0	0.166781	0.999975	0
A_23_P113471	NM_174912	NM_174912	158584	fatty acid amide hydrolase 2	FAAH2	0.0450429	0.643585	0	0.0408744	0.682968	0	0.0600463	0.376294	0	-0.0524598	0.999232	0	-0.00162382	0.997341	0	-0.0869908	0.539626	0	-0.0150033	0.979833	0	-0.0191719	0.974571	0	-0.00416858	0.999957	0	0.034531	0.904391	0	0.085367	0.752045	0	0.050836	0.999975	0
A_33_P3335740	NR_026891	NR_026891	55056	GABPB1 intronic transcript	GABPB1-IT1	-0.130304	0.182263	0	-0.00772063	0.968832	0	0.0285958	0.789656	0	0.0374804	0.999232	0	-0.0863967	0.808385	0	-0.014955	0.953085	0	-0.1589	0.695652	0	-0.0363165	0.966283	0	0.122583	0.999957	0	0.0524353	0.881575	0	-0.0714417	0.850385	0	-0.123877	0.999975	0
A_33_P3629247	NM_017844	NM_017844	51281	ankyrin repeat and MYND domain containing 1	ANKMY1	0.0538428	0.776525	0	0.0616233	0.75098	0	-0.103927	0.404474	0	0.198116	0.999232	0	0.0583642	0.938728	0	-0.159172	0.534615	0	0.15777	0.769585	0	0.165551	0.858639	0	0.00778046	0.999957	0	0.357288	0.354288	0	0.217536	0.636456	0	-0.139751	0.999975	0
A_21_P0000163	NM_001205252	NM_001205252	401934	ring finger protein 223	RNF223	0.156778	0.608899	0	0.110589	0.74587	0	0.0756807	0.77858	0	0.090207	0.999232	0	-0.0894995	0.948574	0	-0.297944	0.504699	0	0.0810972	0.961293	0	0.0349086	0.986079	0	-0.0461886	0.999957	0	0.388151	0.584696	0	0.208444	0.824878	0	-0.179707	0.999975	0
A_32_P129950	NM_001012754	NM_001012754	387921	NHL repeat containing 3	NHLRC3	-0.0764966	0.674547	0	0.0671825	0.725582	0	0.0396564	0.799699	0	-0.12227	0.999232	0	0.0598563	0.938495	0	-0.115398	0.679956	0	-0.116153	0.844147	0	0.0275261	0.981347	0	0.143679	0.999957	0	-0.00687293	0.990707	0	0.175254	0.71821	0	0.182127	0.999975	0
A_23_P203488	NM_000543	NM_000543	6609	sphingomyelin phosphodiesterase 1	SMPD1	-0.193788	0.0493196	-1	-0.0789361	0.516133	0	-0.109661	0.214385	0	-0.078813	0.999232	0	-0.0651075	0.895976	0	-0.100234	0.621772	0	-0.0841266	0.850536	0	0.0307249	0.969837	0	0.114852	0.999957	0	0.0214207	0.960785	0	0.0351262	0.93528	0	0.0137055	0.999975	0
A_33_P3429242	ENST00000499502	ENST00000499502				0.0873022	0.473226	0	0.0528839	0.704221	0	-0.0231657	0.849853	0	0.291063	0.999232	0	-0.0308992	0.95877	0	-0.0176375	0.947489	0	0.110468	0.786642	0	0.0760496	0.910726	0	-0.0344183	0.999957	0	0.308701	0.291686	0	-0.0132617	0.977579	0	-0.321962	0.999975	0
A_33_P3401252	AY956769	AY956769				-0.146477	0.22844	0	-0.0555911	0.730766	0	-0.0709515	0.529463	0	-0.387285	0.495024	0	-0.255714	0.350859	0	-0.122687	0.579591	0	-0.0755251	0.890408	0	0.0153604	0.987399	0	0.0908855	0.999957	0	-0.264599	0.424372	0	-0.133027	0.750562	0	0.131572	0.999975	0
A_21_P0007679	TCONS_00020677	TCONS_00020677				0.00638285	0.976671	0	0.0271332	0.904242	0	-0.155606	0.136167	0	-0.0463712	0.999232	0	-0.202123	0.550385	0	-0.24068	0.258053	0	0.161989	0.746686	0	0.18274	0.84917	0	0.0207503	0.999957	0	0.194309	0.604658	0	0.0385564	0.941945	0	-0.155752	0.999975	0
A_23_P118406	NM_001033046	NM_001033046	79415	cytochrome b-245 chaperone 1	CYBC1	-0.0227261	0.884382	0	0.0142306	0.942403	0	-0.0967594	0.283841	0	0.123136	0.999232	0	0.0429331	0.942501	0	0.256481	0.123042	0	0.0740333	0.877061	0	0.11099	0.873679	0	0.0369567	0.999957	0	-0.133345	0.6761	0	-0.213548	0.525574	0	-0.0802032	0.999975	0
A_33_P3271445	NM_001130105	NM_001130105	10087	collagen type IV alpha 3 binding protein	COL4A3BP	-0.0881852	0.460988	0	-0.112853	0.274726	0	-0.16268	0.0461976	-1	-0.123215	0.999232	0	-0.0109488	0.989756	0	-0.0787756	0.702178	0	0.0744953	0.871739	0	0.0498278	0.951774	0	-0.0246674	0.999957	0	-0.0444398	0.908863	0	0.0678267	0.865181	0	0.112267	0.999975	0
A_24_P361167	NM_020920	NM_020920	57680	chromodomain helicase DNA binding protein 8	CHD8	-0.151911	0.179871	0	-0.164817	0.11355	0	-0.253045	0.0046064	-1	-0.136779	0.999232	0	-0.251812	0.319336	0	-0.126874	0.543508	0	0.101134	0.830147	0	0.0882279	0.90086	0	-0.0129058	0.999957	0	-0.00990508	0.983212	0	-0.124938	0.755307	0	-0.115033	0.999975	0
A_23_P420942	XM_005255956	XM_005255956	4493	metallothionein 1E	MT1E	-0.0079895	0.971314	0	0.165318	0.193692	0	-0.11223	0.331279	0	-0.0249889	0.999232	0	0.0816198	0.895601	0	-0.343715	0.0986679	0	0.104241	0.853325	0	0.277548	0.827784	0	0.173308	0.999957	0	0.318726	0.387354	0	0.425335	0.325156	0	0.106609	0.999975	0
A_33_P3393170	NM_004055	NM_004055	726	calpain 5	CAPN5	0.0250574	0.894665	0	-0.00921234	0.971259	0	-0.0141061	0.931167	0	0.136315	0.999232	0	-0.084799	0.879689	0	-0.276499	0.174202	0	0.0391635	0.965151	0	0.00489378	0.998447	0	-0.0342697	0.999957	0	0.412814	0.258877	0	0.1917	0.645834	0	-0.221114	0.999975	0
A_33_P3325935	NM_001167989	NM_001167989	10084	polyglutamine binding protein 1	PQBP1	0.0442401	0.850942	0	0.08154	0.712176	0	0.0130598	0.952368	0	0.0480306	0.999232	0	0.0222804	0.986088	0	-0.259478	0.359605	0	0.0311802	0.980418	0	0.0684801	0.961505	0	0.0372999	0.999957	0	0.307509	0.505007	0	0.281759	0.599699	0	-0.0257502	0.999975	0
A_23_P401076	NM_145006	NM_145006	203328	sushi domain containing 3	SUSD3	0.0956512	0.414273	0	0.0132807	0.945548	0	0.132498	0.113295	0	-0.0244825	0.999232	0	-0.00493316	0.993518	0	0.113891	0.554888	0	-0.0368469	0.957049	0	-0.119217	0.865217	0	-0.0823705	0.999957	0	-0.138373	0.656494	0	-0.118824	0.744962	0	0.0195493	0.999975	0
A_23_P59714	NR_026902	NR_026902	84060	RNA binding motif protein 48	RBM48	-0.0347405	0.818967	0	-0.0724397	0.577947	0	-0.0543397	0.615893	0	0.0296733	0.999232	0	-0.0415134	0.945127	0	0.128657	0.517888	0	0.0195993	0.981232	0	-0.0180999	0.982814	0	-0.0376992	0.999957	0	-0.0989836	0.776486	0	-0.17017	0.636747	0	-0.0711867	0.999975	0
A_33_P3316093	ENST00000415226	ENST00000415226				-0.000449296	0.998834	0	0.118598	0.59664	0	0.0482305	0.816705	0	-0.0273515	0.999232	0	-0.156267	0.822604	0	-0.0955294	0.808178	0	-0.0486798	0.972602	0	0.0703672	0.966283	0	0.119047	0.999957	0	0.0681779	0.922665	0	-0.0607375	0.935721	0	-0.128915	0.999975	0
A_32_P102062	NM_001455	NM_001455	2309	forkhead box O3	FOXO3	-0.288084	0.0100567	-1	-0.206332	0.0569053	0	-0.0958601	0.369156	0	-0.0496523	0.999232	0	-0.041579	0.95108	0	-0.352068	0.0620549	0	-0.192223	0.701072	0	-0.110472	0.881491	0	0.0817516	0.999957	0	0.302416	0.366651	0	0.310489	0.410457	0	0.00807328	0.999975	0
A_23_P102965	NM_015367	NM_015367	23786	BCL2 like 13	BCL2L13	-0.0582604	0.549969	0	-0.0221142	0.864711	0	0.00503754	0.9638	0	0.105186	0.999232	0	0.0700941	0.813433	0	-0.079527	0.602412	0	-0.063298	0.852714	0	-0.0271518	0.968008	0	0.0361462	0.999957	0	0.184713	0.409568	0	0.149621	0.566195	0	-0.0350916	0.999975	0
A_23_P56314	NM_006830	NM_006830	10975	ubiquinol-cytochrome c reductase, complex III subunit XI	UQCR11	0.392073	0.00777955	1	0.306735	0.0266671	1	0.351807	0.00483949	1	0.0806734	0.999232	0	0.219602	0.624257	0	0.342035	0.178606	0	0.0402662	0.973414	0	-0.0450718	0.971158	0	-0.085338	0.999957	0	-0.261362	0.562849	0	-0.122434	0.840116	0	0.138928	0.999975	0
A_21_P0000033	NM_001162435	NM_001162435	100287718	ankyrin repeat domain 66	ANKRD66	0.127692	0.686705	0	0.173098	0.540706	0	0.0225729	0.943465	0	0.143146	0.999232	0	-0.0374791	0.982846	0	-0.239295	0.60428	0	0.105119	0.941984	0	0.150525	0.934239	0	0.0454057	0.999957	0	0.382441	0.587855	0	0.201815	0.829324	0	-0.180625	0.999975	0
A_23_P46063	NM_013330	NM_013330	29922	NME/NM23 family member 7	NME7	-0.00983562	0.958643	0	0.0162221	0.940892	0	0.120171	0.224551	0	0.195129	0.999232	0	0.0294471	0.969662	0	-0.111348	0.622797	0	-0.130006	0.774714	0	-0.103948	0.887155	0	0.0260577	0.999957	0	0.306477	0.353144	0	0.140795	0.731169	0	-0.165682	0.999975	0
A_33_P3323607	ENST00000409717	ENST00000409717				0.139317	0.79089	0	-0.00342358	0.99751	0	0.22362	0.53676	0	0.278326	0.999232	0	0.125543	0.953853	0	-0.936833	0.115998	0	-0.0843031	0.978095	0	-0.227043	0.936034	0	-0.14274	0.999957	0	1.21516	0.260422	0	1.06238	0.371031	0	-0.152783	0.999975	0
A_33_P3356910	NM_001006938	NM_001006938	158931	transcription elongation factor A like 6	TCEAL6	0.091906	0.374919	0	-0.0160677	0.925	0	0.100832	0.195092	0	0.00417539	0.999232	0	-0.0135914	0.984199	0	0.0365692	0.862568	0	-0.00892583	0.989441	0	-0.1169	0.851076	0	-0.107974	0.999957	0	-0.0323938	0.927719	0	-0.0501607	0.891725	0	-0.0177668	0.999975	0
A_23_P10870	NM_014908	NM_014908	22845	dolichol kinase	DOLK	0.0111999	0.933543	0	-0.0226491	0.867848	0	0.0296618	0.741176	0	0.0334276	0.999232	0	-0.0414621	0.924624	0	0.0878654	0.573696	0	-0.0184619	0.978389	0	-0.0523109	0.934091	0	-0.033849	0.999957	0	-0.0544379	0.850318	0	-0.129327	0.64142	0	-0.0748896	0.999975	0
A_33_P3252441	A_33_P3252441	A_33_P3252441				0.0478942	0.797949	0	0.0572019	0.764286	0	0.0707574	0.589722	0	0.0862903	0.999232	0	-0.054968	0.941239	0	0.131647	0.6053	0	-0.0228632	0.981617	0	-0.0135555	0.989311	0	0.00930776	0.999957	0	-0.0453569	0.928864	0	-0.186615	0.679549	0	-0.141258	0.999975	0
A_33_P3240053	NM_001015072	NM_001015072	402682	UFM1 specific peptidase 1 (inactive)	UFSP1	0.0963539	0.434854	0	0.0718031	0.579605	0	0.056587	0.593511	0	0.0647432	0.999232	0	0.0865543	0.8401	0	0.175792	0.339061	0	0.0397669	0.952771	0	0.0152162	0.986079	0	-0.0245507	0.999957	0	-0.111049	0.744849	0	-0.0892375	0.830237	0	0.0218111	0.999975	0
A_23_P136683	NM_001243961	NM_001243961	3119	major histocompatibility complex, class II, DQ beta 1	HLA-DQB1	-0.0692217	0.705401	0	0.0246032	0.922479	0	-0.0227042	0.893538	0	0.0779689	0.999232	0	-0.0435764	0.956727	0	0.0852863	0.767843	0	-0.0465175	0.960549	0	0.0473074	0.968008	0	0.0938249	0.999957	0	-0.00731737	0.99041	0	-0.128863	0.803378	0	-0.121545	0.999975	0
A_21_P0011035	XR_242910	XR_242910				0.0275668	0.904888	0	0.0551704	0.809014	0	0.192811	0.117272	0	0.018757	0.999232	0	0.127799	0.827355	0	0.137337	0.640875	0	-0.165244	0.780026	0	-0.13764	0.885246	0	0.0276036	0.999957	0	-0.11858	0.817722	0	-0.00953821	0.988517	0	0.109042	0.999975	0
A_33_P3261953	NR_103470	NR_103470	100996349	testis expressed 264 pseudogene	LOC100996349	0.0787798	0.748675	0	0.173947	0.357161	0	-0.0195329	0.934047	0	0.0568436	0.999232	0	0.00660395	0.995165	0	-0.352863	0.235009	0	0.0983127	0.918013	0	0.19348	0.873679	0	0.0951669	0.999957	0	0.409706	0.416636	0	0.359467	0.537785	0	-0.0502397	0.999975	0
A_23_P215819	NM_024061	NM_024061	79027	zinc finger protein 655	ZNF655	-0.0507281	0.63533	0	-0.0339314	0.781124	0	0.0490072	0.543733	0	-0.0564642	0.999232	0	-0.0965249	0.717543	0	0.0169812	0.937412	0	-0.0997354	0.758129	0	-0.0829386	0.87537	0	0.0167967	0.999957	0	-0.0734454	0.789484	0	-0.113506	0.689818	0	-0.0400607	0.999975	0
A_23_P120710	NM_003316	NM_003316	7267	tetratricopeptide repeat domain 3	TTC3	-0.0822907	0.419299	0	-0.0692679	0.496055	0	-0.0505189	0.561873	0	-0.0754685	0.999232	0	-0.0906081	0.771138	0	0.00855972	0.970821	0	-0.0317718	0.957799	0	-0.018749	0.98042	0	0.0130228	0.999957	0	-0.0840283	0.77181	0	-0.0991678	0.757413	0	-0.0151396	0.999975	0
A_21_P0007504	TCONS_00020238	TCONS_00020238				0.0381345	0.812565	0	-0.00137719	0.996376	0	-0.0930741	0.358406	0	0.0446006	0.999232	0	0.0760879	0.883321	0	0.108734	0.62265	0	0.131209	0.769585	0	0.0916969	0.899229	0	-0.0395117	0.999957	0	-0.0641337	0.876335	0	-0.0326464	0.94538	0	0.0314873	0.999975	0
A_21_P0011530	NM_031213	NM_031213	81926	abhydrolase domain containing 17A	ABHD17A	0.0413951	0.841729	0	0.125446	0.426554	0	0.0710341	0.626252	0	0.0207891	0.999232	0	0.101345	0.872571	0	0.218083	0.389527	0	-0.029639	0.979737	0	0.054412	0.966283	0	0.084051	0.999957	0	-0.197294	0.649807	0	-0.116738	0.835172	0	0.0805558	0.999975	0
A_23_P12173	NM_181715	NM_181715	200186	CREB regulated transcription coactivator 2	CRTC2	-0.0769005	0.486482	0	-0.220843	0.00600458	-1	-0.13855	0.063152	0	-0.0264672	0.999232	0	-0.0650762	0.874365	0	-0.272524	0.064029	0	0.0616499	0.885648	0	-0.0822928	0.887155	0	-0.143943	0.999957	0	0.246057	0.348977	0	0.207448	0.487647	0	-0.0386091	0.999975	0
A_33_P3324137	BC015320	BC015320				-0.0448908	0.825847	0	-0.231463	0.0772952	0	-0.105409	0.421909	0	0.0391785	0.999232	0	0.0933434	0.888451	0	-0.0688275	0.828184	0	0.0605181	0.946208	0	-0.126054	0.888161	0	-0.186572	0.999957	0	0.108006	0.824597	0	0.162171	0.751349	0	0.0541649	0.999975	0
A_33_P3336484	NM_001277325	NM_001277325	100288332	nuclear pore complex interacting protein family member A5	NPIPA5	-0.0423056	0.831581	0	0.00323003	0.991379	0	-0.229296	0.0399746	-1	0.0421811	0.999232	0	-0.0456196	0.955584	0	0.0912529	0.755579	0	0.18699	0.738371	0	0.232526	0.835508	0	0.0455356	0.999957	0	-0.0490718	0.927611	0	-0.136873	0.792822	0	-0.0878007	0.999975	0
A_23_P114466	NM_033284	NM_033284	90665	transducin beta like 1 Y-linked	TBL1Y	-0.116036	0.424612	0	-0.267681	0.0159319	-1	-0.269717	0.00723461	-1	0.0375294	0.999232	0	-0.125723	0.779358	0	-0.154607	0.508145	0	0.153681	0.753668	0	0.00203561	0.999288	0	-0.151645	0.999957	0	0.192136	0.607033	0	0.0288844	0.957276	0	-0.163252	0.999975	0
A_24_P365767	NM_000397	NM_000397	1536	cytochrome b-245 beta chain	CYBB	-0.00634096	0.977133	0	0.155837	0.216234	0	-0.0131867	0.938884	0	-0.120465	0.999232	0	0.0622947	0.929893	0	0.103085	0.688631	0	0.00684578	0.995599	0	0.169024	0.850492	0	0.162178	0.999957	0	-0.22355	0.546645	0	-0.0407904	0.93874	0	0.182759	0.999975	0
A_23_P98431	NM_000190	NM_000190	3145	hydroxymethylbilane synthase	HMBS	0.294219	0.0955453	0	0.11089	0.632229	0	0.358135	0.013384	1	0.162667	0.999232	0	0.335322	0.46856	0	-0.101418	0.796018	0	-0.0639153	0.959175	0	-0.247244	0.850492	0	-0.183329	0.999957	0	0.264084	0.630131	0	0.43674	0.454253	0	0.172656	0.999975	0
A_33_P3409099	NM_000332	NM_000332	6310	ataxin 1	ATXN1	-0.0528795	0.736627	0	-0.141149	0.21058	0	-0.0189573	0.894433	0	0.0344242	0.999232	0	0.064658	0.910379	0	0.118859	0.587862	0	-0.0339222	0.968258	0	-0.122192	0.873679	0	-0.0882696	0.999957	0	-0.0844345	0.829144	0	-0.0542007	0.906579	0	0.0302338	0.999975	0
A_23_P164141	NM_176863	NM_176863	10197	proteasome activator subunit 3	PSME3	-0.212464	0.113391	0	-0.0496071	0.811986	0	-0.0585568	0.68602	0	-0.132682	0.999232	0	-0.207554	0.587204	0	-0.216372	0.368081	0	-0.153907	0.772698	0	0.00894965	0.994851	0	0.162856	0.999957	0	0.08369	0.862671	0	0.00881809	0.988326	0	-0.0748719	0.999975	0
A_23_P129221	NM_000137	NM_000137	2184	fumarylacetoacetate hydrolase	FAH	-0.0683758	0.649216	0	-0.0684163	0.646907	0	0.0482964	0.696	0	0.122612	0.999232	0	0.0040274	0.995165	0	-0.079323	0.743128	0	-0.116672	0.800667	0	-0.116713	0.87537	0	-4.04974e-05	0.999957	0	0.201935	0.547219	0	0.0833504	0.855001	0	-0.118585	0.999975	0
A_33_P3358641	NM_001137552	NM_001137552	9208	LRR binding FLII interacting protein 1	LRRFIP1	-0.270226	0.00761273	-1	-0.213271	0.0246778	-1	-0.147121	0.0900291	0	-0.204153	0.999232	0	-0.111825	0.762132	0	-0.0820292	0.705365	0	-0.123104	0.769585	0	-0.0661497	0.935432	0	0.0569544	0.999957	0	-0.122124	0.717305	0	-0.0297958	0.946751	0	0.0923285	0.999975	0
A_33_P3320283	A_33_P3320283	A_33_P3320283				-0.167575	0.333945	0	-0.10848	0.570288	0	-0.026115	0.894271	0	-0.02128	0.999232	0	0.120778	0.850445	0	-0.206566	0.474721	0	-0.14146	0.835535	0	-0.0823652	0.946367	0	0.0590945	0.999957	0	0.185286	0.708201	0	0.327344	0.523071	0	0.142058	0.999975	0
A_23_P14464	NM_006544	NM_006544	10640	exocyst complex component 5	EXOC5	-0.0694763	0.5912	0	0.0585718	0.662522	0	0.0225695	0.854421	0	-0.102494	0.999232	0	0.0879602	0.826193	0	0.155823	0.393225	0	-0.0920458	0.835716	0	0.0360023	0.967907	0	0.128048	0.999957	0	-0.258317	0.372986	0	-0.0678632	0.867387	0	0.190454	0.999975	0
A_21_P0013477	TCONS_l2_00027751	TCONS_l2_00027751				0.163613	0.397141	0	0.33653	0.0263638	1	0.0250095	0.906009	0	0.171175	0.999232	0	0.0810642	0.930928	0	0.355974	0.205957	0	0.138604	0.849706	0	0.311521	0.827784	0	0.172917	0.999957	0	-0.184799	0.734056	0	-0.27491	0.631044	0	-0.0901107	0.999975	0
A_24_P297539	NM_181801	NM_181801	11065	ubiquitin conjugating enzyme E2 C	UBE2C	0.137351	0.367456	0	0.068439	0.71312	0	-0.102211	0.41372	0	0.0105543	0.999232	0	-0.469046	0.0956966	0	-0.24045	0.300909	0	0.239563	0.685006	0	0.17065	0.854322	0	-0.0689123	0.999957	0	0.251004	0.521702	0	-0.228596	0.619054	0	-0.4796	0.999975	0
A_23_P251342	NM_002093	NM_002093	2932	glycogen synthase kinase 3 beta	GSK3B	-0.0786577	0.568593	0	-0.207212	0.0386412	-1	-0.0588189	0.596967	0	-0.0276965	0.999232	0	-0.114612	0.768808	0	0.0617918	0.797241	0	-0.0198388	0.981617	0	-0.148393	0.850492	0	-0.128555	0.999957	0	-0.0894883	0.813628	0	-0.176404	0.637996	0	-0.0869152	0.999975	0
A_33_P3299811	NR_027286	NR_027286	642946	FLVCR1 divergent transcript	FLVCR1-DT	0.0578391	0.692196	0	0.0220261	0.910817	0	-0.0630764	0.558463	0	0.0684189	0.999232	0	0.153128	0.630048	0	0.247556	0.168271	0	0.120916	0.779402	0	0.0851025	0.90504	0	-0.035813	0.999957	0	-0.179137	0.57817	0	-0.0944277	0.825755	0	0.084709	0.999975	0
A_33_P3405168	NM_172250	NM_172250	166785	methylmalonic aciduria (cobalamin deficiency) cblA type	MMAA	-0.0229089	0.894603	0	0.000233058	0.99961	0	0.030296	0.816099	0	0.118682	0.999232	0	0.105249	0.798742	0	0.0594232	0.81004	0	-0.0532049	0.935332	0	-0.0300629	0.973361	0	0.023142	0.999957	0	0.0592585	0.887778	0	0.0458256	0.921675	0	-0.0134329	0.999975	0
A_24_P6911	NR_023383	NR_023383	441263	DTX2P1-UPK3BP1-PMS2P11 readthrough, transcribed pseudogene	DTX2P1-UPK3BP1-PMS2P11	-0.12825	0.179506	0	-0.0376094	0.78599	0	-0.099639	0.207612	0	0.0228577	0.999232	0	-0.115499	0.695476	0	0.138557	0.404532	0	-0.0286106	0.965506	0	0.0620295	0.928903	0	0.0906401	0.999957	0	-0.115699	0.689527	0	-0.254056	0.395603	0	-0.138357	0.999975	0
A_23_P93690	NM_182776	NM_182776	4176	minichromosome maintenance complex component 7	MCM7	0.00726183	0.972323	0	-0.0570679	0.745446	0	-0.0588971	0.646166	0	-0.166306	0.999232	0	-0.182266	0.60379	0	0.010593	0.97416	0	0.0661589	0.922701	0	0.00182913	0.999325	0	-0.0643298	0.999957	0	-0.176899	0.638348	0	-0.192859	0.645078	0	-0.0159603	0.999975	0
A_23_P20722	NM_003086	NM_003086	6621	small nuclear RNA activating complex polypeptide 4	SNAPC4	-0.110927	0.21517	0	-0.157572	0.0437266	-1	-0.174461	0.0111623	-1	0.00655217	0.999232	0	-0.161223	0.462632	0	-0.0958342	0.556766	0	0.0635346	0.871439	0	0.0168899	0.981347	0	-0.0466447	0.999957	0	0.102386	0.705007	0	-0.065389	0.848017	0	-0.167775	0.999975	0
A_23_P112201	NM_015061	NM_015061	23081	lysine demethylase 4C	KDM4C	-0.0632851	0.678673	0	-0.0835094	0.545161	0	0.0191023	0.894815	0	-0.0486739	0.999232	0	-0.00419092	0.995165	0	-0.141598	0.513154	0	-0.0823874	0.8779	0	-0.102612	0.888161	0	-0.0202243	0.999957	0	0.0929239	0.814882	0	0.137407	0.739384	0	0.044483	0.999975	0
A_23_P108641	NM_032822	NM_032822	84908	family with sequence similarity 136 member A	FAM136A	0.0889831	0.417067	0	0.0534612	0.669612	0	0.0616238	0.497584	0	-0.0213495	0.999232	0	0.00847527	0.990942	0	0.00375085	0.99023	0	0.0273594	0.969619	0	-0.00816262	0.99177	0	-0.035522	0.999957	0	-0.0251004	0.945932	0	0.00472442	0.991113	0	0.0298248	0.999975	0
A_33_P3223397	ENST00000553174	ENST00000553174				0.0850361	0.859014	0	-0.0052823	0.99483	0	0.180725	0.572653	0	0.0475054	0.999232	0	0.0234458	0.991567	0	-0.596706	0.275315	0	-0.0956892	0.968258	0	-0.186008	0.941442	0	-0.0903184	0.999957	0	0.644212	0.485716	0	0.620152	0.561824	0	-0.0240596	0.999975	0
A_32_P8251	NM_020901	NM_020901	57661	PHD and ring finger domains 1	PHRF1	-0.184773	0.147721	0	-0.300997	0.00647391	-1	-0.20352	0.0463304	-1	-0.235417	0.999232	0	-0.252477	0.430215	0	-0.17947	0.434028	0	0.0187469	0.983262	0	-0.0974778	0.908064	0	-0.116225	0.999957	0	-0.0559467	0.908321	0	-0.0730069	0.885464	0	-0.0170603	0.999975	0
A_32_P101699	ENST00000565382	ENST00000565382				0.0872823	0.513405	0	0.100383	0.40528	0	-0.0142137	0.920262	0	0.150151	0.999232	0	-0.171215	0.571089	0	0.174549	0.368081	0	0.101496	0.828046	0	0.114596	0.874631	0	0.0131002	0.999957	0	-0.0243982	0.957965	0	-0.345764	0.333538	0	-0.321366	0.999975	0
A_33_P3361412	NM_018420	NM_018420	55356	solute carrier family 22 member 15	SLC22A15	-0.0398118	0.836632	0	-0.0178648	0.943966	0	-0.0675624	0.620314	0	0.174356	0.999232	0	0.110742	0.83492	0	-0.276098	0.215613	0	0.0277506	0.979737	0	0.0496976	0.966417	0	0.021947	0.999957	0	0.450454	0.257017	0	0.386841	0.369002	0	-0.0636136	0.999975	0
A_33_P3436646	AK091114	AK091114				0.107704	0.445179	0	0.0202589	0.927816	0	-0.104621	0.326279	0	0.135508	0.999232	0	0.00494097	0.995037	0	-0.0816208	0.746705	0	0.212325	0.685006	0	0.12488	0.874631	0	-0.087445	0.999957	0	0.217129	0.532742	0	0.0865618	0.855382	0	-0.130567	0.999975	0
A_23_P54556	NM_014048	NM_014048	57496	MKL1/myocardin like 2	MKL2	0.0238506	0.884998	0	0.0550401	0.713153	0	0.0348605	0.775683	0	-0.111417	0.999232	0	0.0808049	0.859722	0	-0.157019	0.425184	0	-0.0110099	0.989415	0	0.0201796	0.981902	0	0.0311895	0.999957	0	0.0456013	0.91403	0	0.237823	0.503049	0	0.192222	0.999975	0
A_33_P3271171	ENST00000358389	ENST00000358389				0.168866	0.788586	0	0.110467	0.88463	0	0.288991	0.498607	0	0.126159	0.999232	0	0.177434	0.944059	0	-0.9904	0.176794	0	-0.120125	0.972602	0	-0.178524	0.965882	0	-0.0583987	0.999957	0	1.11656	0.377375	0	1.16783	0.412544	0	0.0512747	0.999975	0
A_23_P117424	NM_025230	NM_025230	80344	DDB1 and CUL4 associated factor 11	DCAF11	-0.00178123	0.994037	0	0.0905069	0.483324	0	0.11647	0.227886	0	0.0755647	0.999232	0	0.0600219	0.917371	0	0.00702964	0.982335	0	-0.118251	0.792761	0	-0.0259626	0.978506	0	0.0922881	0.999957	0	0.068535	0.864262	0	0.0529923	0.907161	0	-0.0155427	0.999975	0
A_23_P205575	NM_022571	NM_022571	64582	G protein-coupled receptor 135	GPR135	0.0159292	0.938176	0	-0.0525837	0.774539	0	-0.10288	0.359475	0	0.105377	0.999232	0	-0.106434	0.828203	0	0.0393725	0.897382	0	0.118809	0.823092	0	0.0502962	0.965257	0	-0.0685129	0.999957	0	0.0660048	0.887778	0	-0.145806	0.745037	0	-0.211811	0.999975	0
A_24_P904903	NM_004640	NM_004640	7919	DExD-box helicase 39B	DDX39B	-0.0881424	0.538099	0	0.0888738	0.514557	0	-0.0390279	0.763239	0	0.120893	0.999232	0	-0.150111	0.676453	0	0.152746	0.475979	0	-0.0491145	0.946556	0	0.127902	0.873627	0	0.177016	0.999957	0	-0.0318536	0.944664	0	-0.302858	0.415763	0	-0.271004	0.999975	0
A_33_P3612740	NM_001032730	NM_001032730	84196	ubiquitin specific peptidase 48	USP48	-0.0435671	0.774777	0	-0.0931527	0.448068	0	-0.0482867	0.673868	0	-0.121843	0.999232	0	0.110327	0.776935	0	-0.174587	0.364177	0	0.00471956	0.996161	0	-0.044866	0.962591	0	-0.0495856	0.999957	0	0.0527441	0.898666	0	0.284914	0.413328	0	0.23217	0.999975	0
A_23_P202496	NM_022451	NM_022451	64318	NOC3 like DNA replication regulator	NOC3L	0.118991	0.373251	0	0.142751	0.226306	0	0.248023	0.00893574	1	-0.0269257	0.999232	0	0.135005	0.730616	0	0.157571	0.470065	0	-0.129031	0.784226	0	-0.105271	0.888161	0	0.0237599	0.999957	0	-0.184497	0.602018	0	-0.0225667	0.965801	0	0.161931	0.999975	0
A_33_P3395859	NM_001193623	NM_001193623	147646	chromosome 19 open reading frame 84	C19orf84	-0.0228224	0.906789	0	0.0957647	0.517062	0	0.10967	0.327968	0	-0.154545	0.999232	0	-0.0582892	0.933997	0	-0.321725	0.111714	0	-0.132493	0.792761	0	-0.0139056	0.988895	0	0.118587	0.999957	0	0.16718	0.66613	0	0.263436	0.521572	0	0.0962559	0.999975	0
A_21_P0010936	ENST00000414939	ENST00000414939				-0.0600103	0.631014	0	-0.0650441	0.583302	0	-0.0464746	0.641869	0	-0.167511	0.999232	0	0.00848648	0.990946	0	0.0623694	0.761144	0	-0.0135357	0.984377	0	-0.0185695	0.981347	0	-0.00503379	0.999957	0	-0.22988	0.403159	0	-0.0538829	0.888113	0	0.175997	0.999975	0
A_23_P1014	NR_026761	NR_026761	84791	long intergenic non-protein coding RNA 467	LINC00467	-0.0264698	0.840534	0	0.0507262	0.671227	0	0.0411751	0.662857	0	-0.151987	0.999232	0	0.0310779	0.953074	0	0.0286859	0.896619	0	-0.0676449	0.867696	0	0.00955117	0.989311	0	0.077196	0.999957	0	-0.180673	0.485716	0	0.002392	0.994996	0	0.183065	0.999975	0
A_24_P921366	NM_033138	NM_033138	800	caldesmon 1	CALD1	0.0302567	0.853482	0	0.0612389	0.681515	0	0.119091	0.210191	0	0.0317381	0.999232	0	0.122841	0.745297	0	-0.0984197	0.658171	0	-0.088834	0.854709	0	-0.0578519	0.94771	0	0.0309822	0.999957	0	0.130158	0.712949	0	0.221261	0.548692	0	0.0911029	0.999975	0
A_33_P3367855	NM_005027	NM_005027	5296	phosphoinositide-3-kinase regulatory subunit 2	PIK3R2	-0.0827015	0.611815	0	-0.101904	0.485104	0	-0.155351	0.14103	0	0.0854051	0.999232	0	-0.0667074	0.920377	0	-0.482493	0.0191117	-1	0.0726493	0.913639	0	0.0534465	0.961505	0	-0.0192028	0.999957	0	0.567898	0.170259	0	0.415786	0.325156	0	-0.152113	0.999975	0
A_23_P300600	NM_021076	NM_021076	4744	neurofilament heavy	NEFH	-0.0934855	0.591292	0	-0.249561	0.0462423	-1	-0.207241	0.0631611	0	-0.0723623	0.999232	0	-0.383757	0.179178	0	-0.295854	0.19534	0	0.113755	0.848075	0	-0.0423203	0.969476	0	-0.156076	0.999957	0	0.223492	0.583009	0	-0.0879034	0.872342	0	-0.311395	0.999975	0
A_23_P118246	NM_016095	NM_016095	51659	GINS complex subunit 2	GINS2	0.0585614	0.763451	0	0.089171	0.614864	0	0.0179782	0.921098	0	-0.0468431	0.999232	0	-0.354935	0.243964	0	0.044353	0.896861	0	0.0405832	0.969358	0	0.0711929	0.950059	0	0.0306096	0.999957	0	-0.0911961	0.853342	0	-0.399288	0.372203	0	-0.308092	0.999975	0
A_24_P134789	NM_181688	NM_181688	353333	keratin associated protein 10-10	KRTAP10-10	-0.035326	0.844362	0	0.0125704	0.959502	0	-0.205946	0.0380949	-1	-0.0457459	0.999232	0	-0.0903473	0.863461	0	-0.13858	0.552651	0	0.170621	0.728836	0	0.218517	0.828696	0	0.0478963	0.999957	0	0.0928344	0.825872	0	0.048233	0.924203	0	-0.0446014	0.999975	0
A_33_P3350748	NM_005556	NM_005556	3855	keratin 7	KRT7	0.0495007	0.937627	0	0.178613	0.740441	0	0.112479	0.794499	0	0.148606	0.999232	0	0.112096	0.960877	0	-0.884297	0.155974	0	-0.0629787	0.982652	0	0.0661338	0.982814	0	0.129112	0.999957	0	1.0329	0.344306	0	0.996394	0.413328	0	-0.0365092	0.999975	0
A_23_P380917	NM_014300	NM_014300	23478	SEC11 homolog A, signal peptidase complex subunit	SEC11A	0.0248688	0.886201	0	0.0449013	0.796269	0	0.101725	0.318206	0	-0.0799191	0.999232	0	0.0105923	0.990627	0	0.297336	0.107392	0	-0.0768563	0.886372	0	-0.0568238	0.951658	0	0.0200325	0.999957	0	-0.377255	0.260422	0	-0.286744	0.437066	0	0.0905114	0.999975	0
A_23_P84154	NM_018460	NM_018460	55843	Rho GTPase activating protein 15	ARHGAP15	-0.0246613	0.884331	0	-0.0419769	0.805848	0	0.0589686	0.601197	0	-0.0575709	0.999232	0	0.185505	0.534545	0	0.0813775	0.725945	0	-0.08363	0.868058	0	-0.100946	0.886655	0	-0.0173156	0.999957	0	-0.138948	0.690013	0	0.104128	0.808571	0	0.243076	0.999975	0
A_23_P145146	NM_002598	NM_002598	5134	programmed cell death 2	PDCD2	0.0993465	0.274831	0	0.124052	0.123174	0	0.121071	0.0790701	0	-0.0857417	0.999232	0	0.0505589	0.902534	0	0.205644	0.133909	0	-0.0217249	0.973976	0	0.00298106	0.998599	0	0.024706	0.999957	0	-0.291385	0.253059	0	-0.155085	0.581711	0	0.136301	0.999975	0
A_21_P0010376	ENST00000416352	ENST00000416352				0.09134	0.772952	0	0.0715674	0.841783	0	-0.0167617	0.957223	0	-0.0862786	0.999232	0	-0.183342	0.841903	0	-0.181754	0.693528	0	0.108102	0.934794	0	0.0883291	0.966283	0	-0.0197726	0.999957	0	0.0954753	0.913464	0	-0.00158849	0.998717	0	-0.0970637	0.999975	0
A_23_P141126	NM_000154	NM_000154	2584	galactokinase 1	GALK1	0.0577712	0.726946	0	0.0254892	0.906116	0	-0.0793932	0.488516	0	0.1358	0.999232	0	-0.10607	0.815031	0	0.269346	0.174202	0	0.137164	0.772104	0	0.104882	0.889758	0	-0.0322819	0.999957	0	-0.133546	0.727599	0	-0.375416	0.337272	0	-0.24187	0.999975	0
A_33_P3403937	AK124011	AK124011				-0.126743	0.225085	0	-0.0806822	0.479834	0	-0.0628241	0.513745	0	0.0752992	0.999232	0	-0.0792994	0.845594	0	-0.114129	0.545253	0	-0.0639187	0.893854	0	-0.0178582	0.982814	0	0.0460605	0.999957	0	0.189428	0.508536	0	0.0348295	0.933755	0	-0.154599	0.999975	0
A_21_P0007119	NR_033847	NR_033847	399821	uncharacterized LOC399821	FLJ37035	0.0529992	0.762855	0	0.0431867	0.826011	0	0.0230976	0.88408	0	0.27295	0.999232	0	0.0551217	0.938139	0	0.266982	0.204147	0	0.0299017	0.976928	0	0.0200891	0.983257	0	-0.00981252	0.999957	0	0.00596782	0.991077	0	-0.211861	0.621824	0	-0.217829	0.999975	0
A_23_P104146	NM_005095	NM_005095	9202	zinc finger MYM-type containing 4	ZMYM4	0.0632017	0.505533	0	-0.002751	0.987102	0	0.0150015	0.877512	0	-0.0124572	0.999232	0	-0.0440213	0.910492	0	-0.0231391	0.904892	0	0.0482002	0.902282	0	-0.0177525	0.979269	0	-0.0659527	0.999957	0	0.0106819	0.973243	0	-0.0208822	0.949821	0	-0.0315641	0.999975	0
A_23_P138631	NM_005445	NM_005445	9126	structural maintenance of chromosomes 3	SMC3	-0.125108	0.485592	0	-0.0929918	0.624677	0	0.158954	0.210732	0	-0.270119	0.999232	0	-0.0243223	0.982269	0	0.204941	0.452752	0	-0.284062	0.685006	0	-0.251946	0.835508	0	0.0321165	0.999957	0	-0.47506	0.268664	0	-0.229263	0.649662	0	0.245796	0.999975	0
A_33_P3352767	NM_002386	NM_002386	4157	melanocortin 1 receptor	MC1R	0.0821866	0.604893	0	-0.0200501	0.930778	0	-0.112697	0.304807	0	0.0481897	0.999232	0	-0.00943303	0.991567	0	0.0242818	0.93986	0	0.194884	0.708281	0	0.0926474	0.910726	0	-0.102237	0.999957	0	0.0239079	0.964662	0	-0.0337148	0.948926	0	-0.0576227	0.999975	0
A_21_P0001800	ENST00000421907	ENST00000421907				0.124932	0.689526	0	0.124429	0.694054	0	0.0033138	0.991989	0	0.0271322	0.999232	0	-0.171637	0.863875	0	-0.426995	0.284558	0	0.121618	0.924949	0	0.121115	0.94771	0	-0.000503401	0.999957	0	0.454127	0.498418	0	0.255358	0.764827	0	-0.198769	0.999975	0
A_33_P3229027	NM_173828	NM_173828	285613	RELT like 2	RELL2	0.143636	0.143163	0	0.129869	0.171126	0	0.00853329	0.948353	0	0.0230525	0.999232	0	-0.0776515	0.844864	0	0.137829	0.435644	0	0.135103	0.728836	0	0.121336	0.858576	0	-0.0137669	0.999957	0	-0.114777	0.709233	0	-0.215481	0.498394	0	-0.100704	0.999975	0
A_23_P76291	NM_007244	NM_007244	11272	proline rich 4	PRR4	0.0201464	0.917041	0	0.0406561	0.829602	0	0.125368	0.227059	0	-0.0271385	0.999232	0	-0.0760383	0.895884	0	0.0738442	0.775983	0	-0.105222	0.841236	0	-0.0847118	0.92098	0	0.0205098	0.999957	0	-0.100983	0.805646	0	-0.149882	0.725609	0	-0.0488998	0.999975	0
A_21_P0007869	TCONS_00021289	TCONS_00021289				0.210889	0.102625	0	0.114597	0.437227	0	0.170189	0.118107	0	0.0655962	0.999232	0	0.00554386	0.994938	0	0.0138233	0.969119	0	0.0406996	0.965475	0	-0.0555918	0.961505	0	-0.0962914	0.999957	0	0.0517728	0.919704	0	-0.00827948	0.988838	0	-0.0600523	0.999975	0
A_33_P3318027	NM_001320	NM_001320	1460	casein kinase 2 beta	CSNK2B	0.00785772	0.966716	0	-0.0159246	0.939751	0	-0.020009	0.886802	0	-0.0683087	0.999232	0	-0.195239	0.504221	0	-0.00516318	0.988075	0	0.0278667	0.975342	0	0.00408436	0.998528	0	-0.0237823	0.999957	0	-0.0631455	0.877003	0	-0.190076	0.612313	0	-0.126931	0.999975	0
A_24_P53519	NM_005483	NM_005483	10036	chromatin assembly factor 1 subunit A	CHAF1A	-0.0673427	0.618496	0	-0.113169	0.298758	0	-0.0856624	0.368594	0	-0.000470069	0.999672	0	-0.300753	0.17915	0	-0.155612	0.41028	0	0.0183197	0.981617	0	-0.0275065	0.974101	0	-0.0458262	0.999957	0	0.155142	0.626949	0	-0.145141	0.690209	0	-0.300283	0.999975	0
A_23_P138461	NM_021830	NM_021830	56652	twinkle mtDNA helicase	TWNK	-0.0969401	0.369134	0	0.0360616	0.804667	0	0.0743768	0.396893	0	-0.0110164	0.999232	0	-0.130809	0.64275	0	-0.00533991	0.984802	0	-0.171317	0.685006	0	-0.0383152	0.965882	0	0.133002	0.999957	0	-0.00567651	0.989478	0	-0.125469	0.707328	0	-0.119793	0.999975	0
A_24_P84428	NM_014412	NM_014412	27101	calcyclin binding protein	CACYBP	-0.0237777	0.862842	0	0.134182	0.130785	0	-0.0141436	0.902711	0	0.107232	0.999232	0	0.0474705	0.923609	0	0.274492	0.0656897	0	-0.00963411	0.989415	0	0.148325	0.835508	0	0.157959	0.999957	0	-0.16726	0.534166	0	-0.227022	0.447063	0	-0.0597613	0.999975	0
A_23_P205686	NM_000021	NM_000021	5663	presenilin 1	PSEN1	-0.132077	0.27608	0	-0.144139	0.19281	0	0.0417602	0.734636	0	-0.0702635	0.999232	0	-0.013519	0.988162	0	0.122813	0.567205	0	-0.173837	0.708281	0	-0.185899	0.835508	0	-0.0120625	0.999957	0	-0.193077	0.558077	0	-0.136332	0.734036	0	0.0567445	0.999975	0
A_33_P3372281	NM_001286265	NM_001286265	57380	MRS2, magnesium transporter	MRS2	-0.00120512	0.995072	0	-0.00371642	0.985723	0	0.0446564	0.632676	0	0.053119	0.999232	0	-0.0342112	0.947295	0	0.0927439	0.597305	0	-0.0458615	0.927887	0	-0.0483728	0.946046	0	-0.0025113	0.999957	0	-0.0396249	0.909476	0	-0.126955	0.684937	0	-0.0873302	0.999975	0
A_24_P250922	NM_000963	NM_000963	5743	prostaglandin-endoperoxide synthase 2	PTGS2	0.00144316	0.995072	0	0.0670274	0.645754	0	0.113443	0.242652	0	-0.0149413	0.999232	0	0.163988	0.60849	0	0.137204	0.51492	0	-0.112	0.808518	0	-0.0464156	0.962591	0	0.0655843	0.999957	0	-0.152145	0.660282	0	0.0267847	0.955976	0	0.17893	0.999975	0
A_21_P0014502	AY952884	AY952884				0.159809	0.351858	0	0.0760869	0.721802	0	0.0734367	0.646477	0	0.159751	0.999232	0	0.169494	0.744854	0	-0.252992	0.348756	0	0.086372	0.916568	0	0.0026502	0.999246	0	-0.0837218	0.999957	0	0.412744	0.348802	0	0.422486	0.392658	0	0.00974224	0.999975	0
A_33_P3376434	NM_001080517	NM_001080517	55209	SET domain containing 5	SETD5	-0.121478	0.167358	0	-0.0783254	0.409939	0	-0.120989	0.0852584	0	0.0204522	0.999232	0	-0.146975	0.521042	0	-0.0977825	0.549951	0	-0.000489453	0.999322	0	0.0426635	0.951447	0	0.0431529	0.999957	0	0.118235	0.65397	0	-0.0491921	0.886184	0	-0.167427	0.999975	0
A_32_P220750	NM_001032392	NM_001032392	5343	plasminogen-like B1	PLGLB1	-0.019433	0.898572	0	-0.109576	0.276826	0	-0.054944	0.575377	0	0.086922	0.999232	0	-0.0509362	0.921583	0	-0.3151	0.0451023	-1	0.035511	0.958027	0	-0.0546317	0.944629	0	-0.0901427	0.999957	0	0.402022	0.184453	0	0.264164	0.400412	0	-0.137858	0.999975	0
A_24_P22746	NM_175907	NM_175907	284273	zinc binding alcohol dehydrogenase domain containing 2	ZADH2	-0.0399271	0.845548	0	-0.0189049	0.943766	0	0.187657	0.103672	0	-0.00120365	0.999297	0	0.19369	0.640037	0	0.0916931	0.758856	0	-0.227584	0.705842	0	-0.206562	0.844713	0	0.0210222	0.999957	0	-0.0928967	0.851193	0	0.101996	0.854646	0	0.194893	0.999975	0
A_23_P116624	NM_004211	NM_004211	9152	solute carrier family 6 member 5	SLC6A5	0.0748412	0.523643	0	0.0769833	0.485613	0	-0.0154016	0.896997	0	0.107777	0.999232	0	-0.0656186	0.88152	0	-0.0666398	0.741797	0	0.0902428	0.823667	0	0.0923849	0.879381	0	0.00214207	0.999957	0	0.174417	0.5322	0	0.00102117	0.997879	0	-0.173396	0.999975	0
A_32_P73217	NM_020141	NM_020141	56900	transmembrane protein 167B	TMEM167B	0.0489349	0.792618	0	0.0222567	0.927445	0	0.124951	0.27514	0	-0.0125303	0.999232	0	0.0229373	0.980256	0	0.111902	0.671341	0	-0.076016	0.91157	0	-0.102694	0.90418	0	-0.0266782	0.999957	0	-0.124432	0.772873	0	-0.0889649	0.864228	0	0.0354676	0.999975	0
A_33_P3271051	NM_004227	NM_004227	9265	cytohesin 3	CYTH3	-0.114441	0.3026	0	-0.178074	0.0569389	0	-0.0864502	0.343488	0	-0.0812607	0.999232	0	-0.0782956	0.851748	0	-0.25765	0.116151	0	-0.0279907	0.972328	0	-0.091624	0.887155	0	-0.0636332	0.999957	0	0.17639	0.553252	0	0.179355	0.598059	0	0.00296509	0.999975	0
A_24_P243776	NM_021994	NM_021994	11179	zinc finger protein 277	ZNF277	0.109417	0.402201	0	0.106945	0.389901	0	0.0115596	0.94049	0	-0.0350273	0.999232	0	0.0742445	0.891281	0	0.0367149	0.895351	0	0.0978572	0.84288	0	0.0953858	0.895557	0	-0.00247139	0.999957	0	-0.0717422	0.858768	0	0.0375296	0.936977	0	0.109272	0.999975	0
A_33_P3370881	ENST00000597630	ENST00000597630				0.0285273	0.887163	0	-0.0163194	0.949751	0	-0.00347188	0.986763	0	0.0115752	0.999232	0	-0.0700673	0.919907	0	0.0217052	0.95166	0	0.0319992	0.97629	0	-0.0128475	0.99025	0	-0.0448467	0.999957	0	-0.01013	0.985949	0	-0.0917725	0.86122	0	-0.0816425	0.999975	0
A_23_P40039	NM_031445	NM_031445	83607	AMMECR1 like	AMMECR1L	-0.0132759	0.944529	0	-0.154819	0.172728	0	0.0124012	0.937005	0	-0.153	0.999232	0	0.064315	0.912602	0	-0.133771	0.544217	0	-0.0256771	0.978986	0	-0.16722	0.84917	0	-0.141543	0.999957	0	-0.0192292	0.96884	0	0.198086	0.615441	0	0.217315	0.999975	0
A_23_P20532	ENST00000276974	ENST00000276974				-0.0583404	0.732229	0	-0.161571	0.183631	0	0.0290566	0.844985	0	-0.0382622	0.999232	0	0.186284	0.597672	0	-0.000988329	0.998089	0	-0.087397	0.880084	0	-0.190628	0.83647	0	-0.103231	0.999957	0	-0.0372738	0.939063	0	0.187272	0.658248	0	0.224546	0.999975	0
A_33_P3352134	NM_030803	NM_030803	55054	autophagy related 16 like 1	ATG16L1	-0.116245	0.369321	0	0.0702628	0.633921	0	-0.0379244	0.767821	0	-0.048671	0.999232	0	0.0175151	0.983534	0	-0.0628771	0.801081	0	-0.0783209	0.88368	0	0.108187	0.881382	0	0.186508	0.999957	0	0.0142061	0.976385	0	0.0803922	0.858946	0	0.0661861	0.999975	0
A_23_P164912	NM_022165	NM_022165	64130	lin-7 homolog B, crumbs cell polarity complex component	LIN7B	0.182248	0.10034	0	0.0362345	0.840193	0	0.00141473	0.992516	0	-0.0540817	0.999232	0	-0.100523	0.814523	0	0.163638	0.424803	0	0.180833	0.708257	0	0.0348197	0.969487	0	-0.146013	0.999957	0	-0.21772	0.503706	0	-0.264161	0.473336	0	-0.046441	0.999975	0
A_24_P410627	NM_001145125	NM_001145125	23608	makorin ring finger protein 1	MKRN1	0.0114208	0.974068	0	0.00378123	0.993818	0	0.390042	0.018294	1	-0.00911867	0.999232	0	0.190042	0.801958	0	-0.31707	0.388583	0	-0.378622	0.685006	0	-0.386261	0.827784	0	-0.0076396	0.999957	0	0.307951	0.620996	0	0.507112	0.443359	0	0.199161	0.999975	0
A_23_P121095	NM_001068	NM_001068	7155	DNA topoisomerase II beta	TOP2B	-0.0378595	0.823412	0	-0.0396618	0.830549	0	0.115745	0.260538	0	-0.220161	0.999232	0	0.0742867	0.895976	0	0.10599	0.651354	0	-0.153605	0.745119	0	-0.155407	0.850492	0	-0.00180236	0.999957	0	-0.326151	0.337791	0	-0.0317032	0.94956	0	0.294448	0.999975	0
A_21_P0010098	TCONS_00028585	TCONS_00028585				0.0486336	0.901823	0	0.105348	0.78134	0	0.0163002	0.963901	0	0.138669	0.999232	0	0.0946933	0.948574	0	-0.456478	0.297959	0	0.0323334	0.986485	0	0.0890476	0.968008	0	0.0567141	0.999957	0	0.595147	0.413915	0	0.551171	0.50946	0	-0.0439759	0.999975	0
A_23_P142750	NM_002759	NM_002759	5610	eukaryotic translation initiation factor 2 alpha kinase 2	EIF2AK2	-0.0158901	0.970235	0	0.22864	0.406283	0	-0.202304	0.371638	0	0.0867931	0.999232	0	-0.234421	0.798539	0	-0.0737639	0.904948	0	0.186414	0.868757	0	0.430944	0.830643	0	0.24453	0.999957	0	0.160557	0.855192	0	-0.160657	0.871943	0	-0.321214	0.999975	0
A_23_P122233	NM_001014990	NM_001014990	29093	mitochondrial ribosomal protein L22	MRPL22	0.224498	0.0414957	1	0.240168	0.0208516	1	0.188149	0.0458976	1	0.00361959	0.999232	0	0.0418316	0.949964	0	0.3547	0.0569564	0	0.0363485	0.965151	0	0.0520184	0.959089	0	0.0156698	0.999957	0	-0.351081	0.293223	0	-0.312869	0.400187	0	0.038212	0.999975	0
A_23_P250813	NM_000553	NM_000553	7486	Werner syndrome RecQ like helicase	WRN	-0.0211505	0.860352	0	-0.0773825	0.373525	0	0.0893618	0.191426	0	-0.133577	0.999232	0	-0.0121666	0.983677	0	-0.0161336	0.938686	0	-0.110512	0.735574	0	-0.166744	0.827784	0	-0.0562319	0.999957	0	-0.117443	0.631539	0	0.003967	0.991199	0	0.12141	0.999975	0
A_32_P8015	NM_001011724	NM_001011724	144983	heterogeneous nuclear ribonucleoprotein A1-like 2	HNRNPA1L2	-0.0442503	0.816877	0	-0.00221689	0.99483	0	0.0921345	0.465559	0	-0.145177	0.999232	0	-0.025383	0.979535	0	0.0392359	0.905297	0	-0.136385	0.797135	0	-0.0943514	0.91913	0	0.0420334	0.999957	0	-0.184413	0.65208	0	-0.0646189	0.905106	0	0.119794	0.999975	0
A_33_P3365352	NR_049793	NR_049793	100130476	uncharacterized LOC100130476	LOC100130476	-0.00584339	0.980057	0	-0.0418064	0.842828	0	-0.0632857	0.648014	0	-0.110448	0.999232	0	0.0580791	0.938495	0	-0.149146	0.555763	0	0.0574424	0.945473	0	0.0214794	0.983025	0	-0.035963	0.999957	0	0.0386988	0.941057	0	0.207225	0.645834	0	0.168527	0.999975	0
A_33_P3315763	A_33_P3315763	A_33_P3315763				0.0250248	0.870205	0	-0.0609586	0.645037	0	-0.0927585	0.302121	0	-0.0079499	0.999232	0	0.00831079	0.991469	0	-0.0564128	0.799045	0	0.117783	0.77115	0	0.0317999	0.968751	0	-0.0859834	0.999957	0	0.0484629	0.900964	0	0.0647236	0.873884	0	0.0162607	0.999975	0
A_33_P3258593	NM_005039	NM_005039	5542	proline rich protein BstNI subfamily 1	PRB1	-0.00480464	0.98923	0	0.151084	0.473086	0	-0.0630335	0.757888	0	0.118995	0.999232	0	0.0442519	0.97257	0	-0.247408	0.464793	0	0.0582289	0.965151	0	0.214118	0.865217	0	0.155889	0.999957	0	0.366403	0.488782	0	0.29166	0.640663	0	-0.0747428	0.999975	0
A_24_P211151	NM_020158	NM_020158	56915	exosome component 5	EXOSC5	-0.00364846	0.988422	0	0.100214	0.510464	0	0.0749617	0.561431	0	0.116131	0.999232	0	-0.0583139	0.938073	0	0.225501	0.318075	0	-0.0786101	0.906352	0	0.0252519	0.981347	0	0.103862	0.999957	0	-0.10937	0.804477	0	-0.283815	0.504607	0	-0.174445	0.999975	0
A_24_P390928	NM_024108	NM_024108	79090	trafficking protein particle complex 6A	TRAPPC6A	0.101391	0.464875	0	0.087334	0.526857	0	0.0900368	0.401377	0	-0.0718623	0.999232	0	0.0513587	0.938073	0	0.349924	0.0606173	0	0.011354	0.989441	0	-0.00270282	0.999185	0	-0.0140568	0.999957	0	-0.421786	0.243839	0	-0.298565	0.422249	0	0.123221	0.999975	0
A_23_P205768	NM_006628	NM_006628	10776	cAMP regulated phosphoprotein 19	ARPP19	0.0151296	0.942821	0	0.0105	0.968932	0	0.171417	0.107492	0	-0.0944925	0.999232	0	0.0981037	0.854587	0	-0.0568465	0.846361	0	-0.156288	0.759413	0	-0.160917	0.858576	0	-0.00462966	0.999957	0	-0.037646	0.941057	0	0.15495	0.73682	0	0.192596	0.999975	0
A_19_P00322705	NR_003491	NR_003491	440823	myocardial infarction associated transcript (non-protein coding)	MIAT	-0.0895779	0.636081	0	-0.0336691	0.8945	0	0.0120061	0.951476	0	0.00479864	0.999232	0	-0.123875	0.828799	0	0.152465	0.585736	0	-0.101584	0.882433	0	-0.0456752	0.968684	0	0.0559088	0.999957	0	-0.147666	0.756074	0	-0.27634	0.567896	0	-0.128674	0.999975	0
A_24_P59247	A_24_P59247	A_24_P59247				0.0254252	0.844409	0	0.0530099	0.64405	0	0.0576127	0.496903	0	-0.043656	0.999232	0	0.0815952	0.802051	0	0.0799172	0.64844	0	-0.0321875	0.957049	0	-0.00460276	0.997103	0	0.0275847	0.999957	0	-0.123573	0.648182	0	0.00167796	0.996178	0	0.125251	0.999975	0
A_33_P3289576	NM_025184	NM_025184	80258	EF-hand domain containing 2	EFHC2	0.0853145	0.4677	0	0.00592956	0.978173	0	0.00461379	0.973398	0	-0.0293836	0.999232	0	-0.0849665	0.826193	0	-0.00763995	0.977265	0	0.0807007	0.85015	0	0.00131577	0.999385	0	-0.0793849	0.999957	0	-0.0217437	0.958007	0	-0.0773265	0.842525	0	-0.0555829	0.999975	0
A_33_P3217998	NR_040288	NR_040288	246181	aldo-keto reductase family 7 like (gene/pseudogene)	AKR7L	0.078927	0.45669	0	0.0654298	0.53893	0	0.0541188	0.536067	0	0.0703571	0.999232	0	-0.0966039	0.75263	0	0.140337	0.376272	0	0.0248082	0.971764	0	0.0113111	0.987989	0	-0.0134971	0.999957	0	-0.0699801	0.820651	0	-0.236941	0.406441	0	-0.166961	0.999975	0
A_23_P53957	NM_016468	NM_016468	51241	COX16, cytochrome c oxidase assembly homolog	COX16	0.278527	0.17433	0	0.260672	0.183057	0	0.233901	0.163623	0	-0.0904324	0.999232	0	0.00164918	0.998834	0	0.420684	0.206788	0	0.0446257	0.978736	0	0.026771	0.987399	0	-0.0178547	0.999957	0	-0.511116	0.367438	0	-0.419035	0.520272	0	0.0920816	0.999975	0
A_24_P219266	NM_153260	NM_153260	255252	leucine rich repeat containing 57	LRRC57	0.00176955	0.994252	0	-0.100918	0.448879	0	-0.019431	0.895012	0	-0.0750251	0.999232	0	-0.058399	0.928532	0	-0.0294355	0.920648	0	0.0212005	0.981617	0	-0.0814866	0.92413	0	-0.102687	0.999957	0	-0.0455896	0.92088	0	-0.0289635	0.954884	0	0.0166261	0.999975	0
A_33_P3264780	NM_001260	NM_001260	1024	cyclin dependent kinase 8	CDK8	-0.0199219	0.912705	0	-0.00103357	0.99751	0	0.108418	0.282291	0	0.242509	0.999232	0	0.0106422	0.990627	0	0.0385042	0.890392	0	-0.12834	0.777378	0	-0.109452	0.881382	0	0.0188883	0.999957	0	0.204005	0.543337	0	-0.0278621	0.954895	0	-0.231867	0.999975	0
A_32_P58074	NM_001006	NM_001006	6189	ribosomal protein S3A	RPS3A	0.388964	0.334573	0	0.552095	0.107412	0	0.361688	0.252364	0	-0.353166	0.999232	0	0.567479	0.573544	0	0.972987	0.0962656	0	0.0272757	0.993665	0	0.190407	0.946753	0	0.163131	0.999957	0	-1.32615	0.239429	0	-0.405509	0.76066	0	0.920645	0.999975	0
A_23_P120845	NM_005080	NM_005080	7494	X-box binding protein 1	XBP1	0.0518893	0.72601	0	0.0226581	0.906431	0	0.162112	0.0630426	0	-0.220939	0.999232	0	-0.102322	0.7941	0	0.125152	0.539392	0	-0.110223	0.79647	0	-0.139454	0.850492	0	-0.0292312	0.999957	0	-0.34609	0.262716	0	-0.227474	0.518258	0	0.118616	0.999975	0
A_33_P3339311	ENST00000434311	ENST00000434311				0.038717	0.781758	0	-0.0382061	0.79931	0	-0.0664126	0.479903	0	-0.00990722	0.999232	0	0.0799747	0.842044	0	-0.0869414	0.65953	0	0.10513	0.790982	0	0.0282064	0.971889	0	-0.0769232	0.999957	0	0.0770342	0.821866	0	0.166916	0.620149	0	0.0898819	0.999975	0
A_21_P0006410	ENST00000420865	ENST00000420865				0.137331	0.306316	0	0.00719576	0.978986	0	-0.0747083	0.533696	0	0.0772505	0.999232	0	0.018655	0.983582	0	-0.286563	0.153692	0	0.21204	0.685006	0	0.0819041	0.928903	0	-0.130136	0.999957	0	0.363813	0.303066	0	0.305218	0.440185	0	-0.0585955	0.999975	0
A_33_P3397051	NM_175876	NM_175876	149371	exocyst complex component 8	EXOC8	-0.0664119	0.618092	0	-0.189056	0.0451118	-1	-0.0423974	0.704429	0	-0.181236	0.999232	0	-0.0395362	0.946773	0	-0.0516832	0.823087	0	-0.0240146	0.977424	0	-0.146658	0.849447	0	-0.122644	0.999957	0	-0.129553	0.688506	0	0.012147	0.979717	0	0.1417	0.999975	0
A_23_P216689	NM_007371	NM_007371	8019	bromodomain containing 3	BRD3	-0.19183	0.0634918	0	-0.221187	0.0212402	-1	-0.174578	0.0451042	-1	-0.168684	0.999232	0	-0.0917173	0.828233	0	-0.101781	0.63089	0	-0.0172517	0.982652	0	-0.0466088	0.960925	0	-0.0293571	0.999957	0	-0.0669025	0.860456	0	0.0100641	0.984219	0	0.0769666	0.999975	0
A_24_P941505	NM_014612	NM_014612	23196	family with sequence similarity 120A	FAM120A	-0.250417	0.0251357	-1	-0.138249	0.254976	0	-0.0359012	0.790928	0	-0.218877	0.999232	0	0.0325037	0.966325	0	-0.031039	0.91713	0	-0.214516	0.685006	0	-0.102347	0.891447	0	0.112168	0.999957	0	-0.187838	0.599224	0	0.0635427	0.896755	0	0.251381	0.999975	0
A_21_P0014060	ENST00000488806	ENST00000488806				-0.0600909	0.768654	0	0.12225	0.462457	0	0.170361	0.166388	0	0.219331	0.999232	0	0.310558	0.384795	0	-0.0562469	0.868958	0	-0.230452	0.708281	0	-0.0481114	0.968684	0	0.182341	0.999957	0	0.275578	0.515097	0	0.366805	0.436303	0	0.0912272	0.999975	0
A_19_P00318189	NR_038889	NR_038889	401320	uncharacterized LOC401320	LOC401320	-0.121098	0.194807	0	-0.0495276	0.681385	0	-0.102972	0.176054	0	0.0330782	0.999232	0	-0.0192319	0.975335	0	0.125496	0.446169	0	-0.0181264	0.979833	0	0.0534443	0.93726	0	0.0715707	0.999957	0	-0.0924177	0.753161	0	-0.144728	0.637021	0	-0.05231	0.999975	0
A_24_P272451	ENST00000571800	ENST00000571800				-0.0257573	0.876806	0	0.00965073	0.96596	0	-0.158773	0.0778645	0	0.179971	0.999232	0	-0.135262	0.701487	0	0.262545	0.143106	0	0.133015	0.760448	0	0.168423	0.837115	0	0.035408	0.999957	0	-0.0825741	0.828308	0	-0.397806	0.291574	0	-0.315232	0.999975	0
A_24_P19828	NM_025077	NM_025077	114034	target of EGR1, exonuclease	TOE1	-0.151863	0.301211	0	0.0660639	0.724166	0	-0.0127266	0.943993	0	-0.0586837	0.999232	0	0.0193563	0.985653	0	-0.054812	0.860271	0	-0.139137	0.795995	0	0.0787905	0.939252	0	0.217927	0.999957	0	-0.00387175	0.994544	0	0.0741682	0.890502	0	0.07804	0.999975	0
A_24_P385585	NM_152834	NM_152834	129787	transmembrane protein 18	TMEM18	-0.0222595	0.887163	0	0.0454731	0.763775	0	0.0668853	0.502182	0	-0.0250641	0.999232	0	0.0806812	0.848541	0	0.101229	0.617724	0	-0.0891448	0.84288	0	-0.0214122	0.980712	0	0.0677326	0.999957	0	-0.126293	0.69784	0	-0.0205476	0.96463	0	0.105745	0.999975	0
A_23_P31671	NM_006294	NM_006294	7381	ubiquinol-cytochrome c reductase binding protein	UQCRB	0.0946948	0.799918	0	0.166663	0.614033	0	0.171058	0.493585	0	0.0259104	0.999232	0	0.0619962	0.972637	0	0.304271	0.538884	0	-0.076363	0.968258	0	-0.00439454	0.999246	0	0.0719685	0.999957	0	-0.278361	0.741384	0	-0.242275	0.809417	0	0.0360858	0.999975	0
A_23_P122947	NM_015060	NM_015060	23080	AVL9 cell migration associated	AVL9	-0.00413407	0.970613	0	-0.0643509	0.363108	0	-0.0168479	0.827647	0	0.0215306	0.999232	0	-0.0318149	0.93091	0	-0.180162	0.0899169	0	0.0127139	0.980425	0	-0.0475029	0.914937	0	-0.0602168	0.999957	0	0.201692	0.291686	0	0.148347	0.489824	0	-0.0533454	0.999975	0
A_33_P3232557	NM_001080418	NM_001080418	58512	DLG associated protein 3	DLGAP3	0.000999435	0.996991	0	0.0487909	0.761208	0	-0.0605997	0.583999	0	0.0870051	0.999232	0	-0.210548	0.455528	0	-0.081343	0.722951	0	0.0615991	0.917839	0	0.109391	0.876296	0	0.0477915	0.999957	0	0.168348	0.611077	0	-0.129205	0.745299	0	-0.297553	0.999975	0
A_24_P76018	NM_001123040	NM_001123040	646450	ariadne RBR E3 ubiquitin protein ligase 2 opposite strand	ARIH2OS	-0.0680395	0.582858	0	-0.0347977	0.819342	0	0.0586248	0.543606	0	-0.0314951	0.999232	0	0.108002	0.746276	0	-0.0341377	0.884751	0	-0.126664	0.746686	0	-0.0934225	0.881382	0	0.0332418	0.999957	0	0.00264261	0.994544	0	0.14214	0.675502	0	0.139497	0.999975	0
A_21_P0008919	TCONS_00024360	TCONS_00024360				-0.00936235	0.96328	0	0.0160289	0.945441	0	-0.164776	0.100589	0	0.104725	0.999232	0	0.15387	0.689335	0	-0.161561	0.473309	0	0.155414	0.748068	0	0.180805	0.844713	0	0.0253913	0.999957	0	0.266286	0.442788	0	0.315431	0.419333	0	0.0491447	0.999975	0
A_23_P117037	NM_015416	NM_015416	25875	LETM1 domain containing 1	LETMD1	0.0518521	0.74208	0	0.046664	0.783591	0	0.125148	0.196335	0	-0.0412562	0.999232	0	0.0672806	0.904985	0	0.19417	0.327345	0	-0.0732962	0.893769	0	-0.0784843	0.924983	0	-0.0051881	0.999957	0	-0.235426	0.468804	0	-0.126889	0.76066	0	0.108537	0.999975	0
A_23_P8339	NM_014161	NM_014161	29074	mitochondrial ribosomal protein L18	MRPL18	-0.0277791	0.873942	0	0.0924715	0.493442	0	0.138875	0.155618	0	-0.0819975	0.999232	0	0.00486921	0.995037	0	0.213605	0.284558	0	-0.166654	0.719429	0	-0.0464038	0.965882	0	0.120251	0.999957	0	-0.295603	0.373046	0	-0.208736	0.59382	0	0.0868667	0.999975	0
A_24_P117672	NM_021228	NM_021228	58506	SR-related CTD associated factor 1	SCAF1	-0.204009	0.108507	0	-0.0340262	0.87615	0	-0.187085	0.0754309	0	-0.116965	0.999232	0	-0.0639158	0.928532	0	-0.0056952	0.988932	0	-0.0169248	0.985599	0	0.153058	0.864148	0	0.169983	0.999957	0	-0.11127	0.79739	0	-0.0582206	0.911866	0	0.0530491	0.999975	0
A_23_P134454	NM_001753	NM_001753	857	caveolin 1	CAV1	0.124735	0.534179	0	-0.00135382	0.99751	0	0.0564059	0.755832	0	-0.0633231	0.999232	0	-0.0122367	0.991567	0	-0.191217	0.537156	0	0.0683292	0.947015	0	-0.0577597	0.967907	0	-0.126089	0.999957	0	0.127894	0.820933	0	0.17898	0.764515	0	0.0510864	0.999975	0
A_23_P76488	NM_001423	NM_001423	2012	epithelial membrane protein 1	EMP1	-0.0934777	0.442191	0	-0.0748192	0.545141	0	-0.0315502	0.78706	0	-0.109488	0.999232	0	0.00127279	0.998578	0	-0.130874	0.494568	0	-0.0619274	0.906444	0	-0.043269	0.961663	0	0.0186585	0.999957	0	0.0213862	0.960785	0	0.132147	0.717606	0	0.110761	0.999975	0
A_23_P323685	NM_003543	NM_003543	8365	histone cluster 1 H4 family member h	HIST1H4H	0.272163	0.0641122	0	0.2596	0.0655714	0	0.0880289	0.561692	0	0.224923	0.999232	0	-0.0012574	0.998834	0	0.145151	0.630014	0	0.184134	0.760448	0	0.171571	0.86851	0	-0.0125634	0.999957	0	0.0797721	0.888387	0	-0.146409	0.802316	0	-0.226181	0.999975	0
A_33_P3300273	NM_198077	NM_198077	148423	chromosome 1 open reading frame 52	C1orf52	0.0100032	0.933404	0	-0.0408798	0.671762	0	0.0308046	0.693205	0	-0.0134914	0.999232	0	0.0892916	0.700432	0	0.0812038	0.557423	0	-0.0208015	0.969952	0	-0.0716845	0.876296	0	-0.050883	0.999957	0	-0.0946952	0.673782	0	0.00808782	0.980822	0	0.102783	0.999975	0
A_33_P3364289	NM_032855	NM_032855	84941	hematopoietic SH2 domain containing	HSH2D	-0.0540917	0.771064	0	0.0775422	0.655221	0	-0.149491	0.18393	0	0.083091	0.999232	0	-0.0565042	0.940201	0	-0.0409524	0.900368	0	0.0953995	0.877061	0	0.227033	0.835508	0	0.131634	0.999957	0	0.124043	0.776889	0	-0.0155518	0.979717	0	-0.139595	0.999975	0
A_24_P113686	NM_017953	NM_017953	54680	zinc finger HIT-type containing 6	ZNHIT6	0.01626	0.908737	0	0.014861	0.929715	0	0.0228282	0.831121	0	0.0471939	0.999232	0	0.0108305	0.988177	0	0.0413821	0.840648	0	-0.00656821	0.994363	0	-0.00796727	0.991601	0	-0.00139906	0.999957	0	0.00581172	0.988308	0	-0.0305516	0.936293	0	-0.0363633	0.999975	0
A_23_P119196	NM_016270	NM_016270	10365	Kruppel like factor 2	KLF2	-0.160907	0.214464	0	-0.237407	0.0348868	-1	-0.146809	0.158971	0	-0.11996	0.999232	0	-0.0704118	0.910412	0	-0.181012	0.419935	0	-0.0140979	0.988112	0	-0.090598	0.913414	0	-0.0765002	0.999957	0	0.0610516	0.896565	0	0.1106	0.81993	0	0.0495486	0.999975	0
A_23_P103803	NM_052939	NM_052939	115352	Fc receptor like 3	FCRL3	0.0125283	0.894355	0	0.055139	0.417316	0	0.0211376	0.755913	0	-0.0103053	0.999232	0	-0.00246044	0.995165	0	0.144862	0.146533	0	-0.00860932	0.984377	0	0.0340014	0.944629	0	0.0426107	0.999957	0	-0.155167	0.372986	0	-0.147323	0.456401	0	0.00784482	0.999975	0
A_21_P0000061	NM_001166241	NM_001166241	10669	cell growth regulator with EF-hand domain 1	CGREF1	0.0434508	0.932213	0	0.0755569	0.888044	0	0.0278438	0.947368	0	0.235393	0.999232	0	-0.0203034	0.992096	0	-0.649608	0.211968	0	0.015607	0.995986	0	0.0477131	0.9852	0	0.0321061	0.999957	0	0.885001	0.320845	0	0.629305	0.540391	0	-0.255696	0.999975	0
A_23_P28169	NM_152522	NM_152522	151188	ADP ribosylation factor like GTPase 6 interacting protein 6	ARL6IP6	0.00262951	0.992876	0	0.0212104	0.936707	0	0.133934	0.282519	0	0.042112	0.999232	0	0.131608	0.801329	0	0.0919387	0.76175	0	-0.131305	0.828612	0	-0.112724	0.902076	0	0.0185809	0.999957	0	-0.0498267	0.928398	0	0.0396694	0.947081	0	0.089496	0.999975	0
A_23_P102832	NM_007186	NM_007186	11190	centrosomal protein 250	CEP250	0.0174416	0.907721	0	0.00486819	0.981541	0	-0.119674	0.13699	0	-0.0642856	0.999232	0	-0.0966876	0.780973	0	0.0193295	0.938759	0	0.137116	0.719429	0	0.124543	0.850492	0	-0.0125734	0.999957	0	-0.083615	0.797338	0	-0.116017	0.73682	0	-0.032402	0.999975	0
A_23_P315286	NM_138774	NM_138774	91300	R3H domain containing 4	R3HDM4	-0.0361618	0.872299	0	-0.0600157	0.790933	0	0.0605983	0.708523	0	0.141147	0.999232	0	0.0252072	0.981273	0	-0.167827	0.557493	0	-0.0967601	0.893769	0	-0.120614	0.900948	0	-0.0238539	0.999957	0	0.308974	0.472396	0	0.193034	0.716799	0	-0.11594	0.999975	0
A_23_P3775	NM_018233	NM_018233	55239	2-oxoglutarate and iron dependent oxygenase domain containing 1	OGFOD1	-0.0428299	0.765228	0	-0.0916787	0.423842	0	-0.00535971	0.971178	0	-0.00838028	0.999232	0	-0.144409	0.631849	0	-0.235696	0.163633	0	-0.0374702	0.957049	0	-0.086319	0.895557	0	-0.0488489	0.999957	0	0.227315	0.437319	0	0.0912864	0.820395	0	-0.136029	0.999975	0
A_21_P0005657	ENST00000510244	ENST00000510244				-0.134499	0.197116	0	-0.0956452	0.37944	0	0.00731853	0.958054	0	0.0485407	0.999232	0	0.0393429	0.945127	0	0.0405003	0.861575	0	-0.141818	0.722013	0	-0.102964	0.87537	0	0.0388539	0.999957	0	0.00804044	0.985115	0	-0.00115739	0.997662	0	-0.00919783	0.999975	0
A_21_P0007546	ENST00000551021	ENST00000551021				-0.000246375	0.998659	0	0.0136819	0.932326	0	0.0532937	0.529614	0	0.0101886	0.999232	0	0.0153479	0.980256	0	-0.0300458	0.885457	0	-0.0535401	0.902414	0	-0.0396119	0.957474	0	0.0139283	0.999957	0	0.0402345	0.904143	0	0.0453937	0.898725	0	0.00515924	0.999975	0
A_21_P0001004	ENST00000448680	ENST00000448680				-0.173445	0.0990488	0	-0.0425883	0.791959	0	-0.105231	0.260538	0	-0.0328444	0.999232	0	0.174462	0.545531	0	0.0456782	0.852648	0	-0.0682132	0.896815	0	0.0626431	0.939261	0	0.130856	0.999957	0	-0.0785225	0.831017	0	0.128784	0.736191	0	0.207307	0.999975	0
A_23_P110433	NM_015342	NM_015342	23398	peptidylprolyl isomerase domain and WD repeat containing 1	PPWD1	0.0201734	0.921052	0	0.0450786	0.818147	0	0.179276	0.0815395	0	-0.130522	0.999232	0	0.13426	0.758528	0	0.140695	0.557493	0	-0.159102	0.748068	0	-0.134197	0.87402	0	0.0249052	0.999957	0	-0.271217	0.45032	0	-0.00643485	0.990821	0	0.264782	0.999975	0
A_24_P107291	NM_181699	NM_181699	5519	protein phosphatase 2 scaffold subunit Abeta	PPP2R1B	-0.00299313	0.993579	0	-0.18087	0.330939	0	-0.015456	0.948434	0	-0.103285	0.999232	0	0.115078	0.8909	0	0.0563537	0.896412	0	0.0124628	0.994363	0	-0.165414	0.881491	0	-0.177877	0.999957	0	-0.159638	0.786182	0	0.058724	0.936641	0	0.218362	0.999975	0
A_32_P64038	BC062632	BC062632				0.260935	0.102625	0	0.179897	0.282264	0	0.180373	0.19247	0	0.0372283	0.999232	0	0.255942	0.568573	0	0.323489	0.238794	0	0.0805619	0.931849	0	-0.00047581	0.999851	0	-0.0810377	0.999957	0	-0.286261	0.547497	0	-0.067547	0.920783	0	0.218714	0.999975	0
A_21_P0001196	TCONS_00000685	TCONS_00000685				-0.119713	0.434165	0	0.0158563	0.950209	0	-0.116604	0.314481	0	0.0974809	0.999232	0	0.0799347	0.899265	0	-0.0352378	0.914087	0	-0.00310972	0.997941	0	0.13246	0.87537	0	0.13557	0.999957	0	0.132719	0.756074	0	0.115173	0.822072	0	-0.0175462	0.999975	0
A_32_P53486	NM_001039182	NM_001039182	654483	bolA family member 2B	BOLA2B	0.312493	0.00910017	1	0.261103	0.0198358	1	0.157886	0.128786	0	-0.0215217	0.999232	0	-0.0340759	0.966325	0	0.343495	0.08949	0	0.154607	0.753668	0	0.103217	0.898823	0	-0.0513898	0.999957	0	-0.365017	0.310575	0	-0.377571	0.352928	0	-0.0125542	0.999975	0
A_23_P126613	NM_080429	NM_080429	89872	aquaporin 10	AQP10	0.0470331	0.851461	0	-0.073814	0.76836	0	0.0207712	0.926626	0	0.0551525	0.999232	0	-0.130908	0.853051	0	-0.215425	0.498802	0	0.0262619	0.982652	0	-0.0945852	0.944629	0	-0.120847	0.999957	0	0.270577	0.595684	0	0.0845165	0.903092	0	-0.186061	0.999975	0
A_23_P61426	NM_012331	NM_012331	4482	methionine sulfoxide reductase A	MSRA	-0.0754616	0.53124	0	-0.321651	0.000145028	-1	-0.147675	0.0647689	0	-0.0304394	0.999232	0	-0.256632	0.214378	0	-0.241832	0.129141	0	0.0722137	0.871739	0	-0.173976	0.82902	0	-0.24619	0.999957	0	0.211393	0.450338	0	-0.0147996	0.973937	0	-0.226192	0.999975	0
A_32_P194072	NM_015395	NM_015395	25851	tectonin beta-propeller repeat containing 1	TECPR1	-0.100786	0.381356	0	-0.168024	0.0726632	0	-0.105124	0.227758	0	-0.0594861	0.999232	0	-0.111718	0.744854	0	0.000453786	0.998652	0	0.00433737	0.996161	0	-0.0629001	0.935587	0	-0.0672374	0.999957	0	-0.0599399	0.870035	0	-0.112171	0.761717	0	-0.0522315	0.999975	0
A_33_P3300395	NM_199294	NM_199294	378708	centromere protein S	CENPS	-0.0417273	0.782836	0	-0.0796654	0.529976	0	0.0351726	0.769085	0	0.0391848	0.999232	0	-0.0208008	0.979535	0	-0.116664	0.567179	0	-0.0768998	0.877061	0	-0.114838	0.873679	0	-0.0379381	0.999957	0	0.155849	0.631889	0	0.0958635	0.817302	0	-0.0599856	0.999975	0
A_23_P114164	NM_013444	NM_013444	29978	ubiquilin 2	UBQLN2	-0.176092	0.137417	0	-0.136265	0.253744	0	-0.0163717	0.913059	0	-0.205433	0.999232	0	-0.0107189	0.990747	0	-0.175051	0.407823	0	-0.15972	0.738371	0	-0.119894	0.87537	0	0.0398263	0.999957	0	-0.0303821	0.948459	0	0.164332	0.687227	0	0.194714	0.999975	0
A_23_P354591	NM_033446	NM_033446	89853	multivesicular body subunit 12B	MVB12B	-0.24507	0.0685079	0	-0.103668	0.531928	0	-0.0189494	0.915186	0	-0.000346674	0.999672	0	-0.00958339	0.991567	0	-0.137322	0.615478	0	-0.226121	0.708257	0	-0.0847186	0.936225	0	0.141402	0.999957	0	0.136975	0.766148	0	0.127739	0.813119	0	-0.00923672	0.999975	0
A_21_P0005720	TCONS_00014759	TCONS_00014759				0.0998769	0.669326	0	0.0213748	0.950428	0	-0.00105101	0.995878	0	0.0191772	0.999232	0	-0.0595664	0.953974	0	-0.309984	0.310822	0	0.100928	0.914644	0	0.0224258	0.987989	0	-0.0785021	0.999957	0	0.329161	0.521151	0	0.250417	0.683301	0	-0.0787435	0.999975	0
A_33_P3318696	NM_001008661	NM_001008661	56267	kynurenine aminotransferase 3	KYAT3	-0.0219949	0.899264	0	-0.0173766	0.933811	0	-0.035692	0.777802	0	0.0264399	0.999232	0	0.142334	0.687493	0	0.0324384	0.907035	0	0.0136972	0.987172	0	0.0183154	0.982814	0	0.00461824	0.999957	0	-0.00599848	0.99041	0	0.109896	0.796397	0	0.115894	0.999975	0
A_23_P10873	NM_003263	NM_003263	7096	toll like receptor 1	TLR1	-0.118268	0.382661	0	-0.130312	0.288334	0	-0.0147901	0.924709	0	-0.0560403	0.999232	0	0.0847198	0.874212	0	-0.0910259	0.709967	0	-0.103478	0.842106	0	-0.115521	0.878281	0	-0.0120433	0.999957	0	0.0349856	0.940497	0	0.175746	0.668291	0	0.14076	0.999975	0
A_23_P201086	NM_001024227	NM_001024227	375	ADP ribosylation factor 1	ARF1	-0.26693	0.0167452	-1	-0.0221072	0.921	0	0.0330487	0.809127	0	-0.0160694	0.999232	0	0.0356133	0.960031	0	0.15529	0.48233	0	-0.299978	0.685006	0	-0.0551559	0.955983	0	0.244822	0.999957	0	-0.171359	0.638833	0	-0.119677	0.790389	0	0.0516827	0.999975	0
A_23_P12874	NM_012341	NM_012341	23560	GTP binding protein 4	GTPBP4	-0.0207031	0.886144	0	-0.00792618	0.968189	0	0.0267415	0.805691	0	-0.147831	0.999232	0	-0.0364988	0.946773	0	-0.00258431	0.993454	0	-0.0474446	0.930932	0	-0.0346677	0.966957	0	0.0127769	0.999957	0	-0.145246	0.612147	0	-0.0339145	0.932996	0	0.111332	0.999975	0
A_33_P3238410	NM_002972	NM_002972	6305	SET binding factor 1	SBF1	0.0234699	0.887209	0	0.0481005	0.763102	0	-0.0422041	0.721582	0	0.0180546	0.999232	0	-0.0473846	0.938522	0	0.167739	0.390789	0	0.065674	0.906432	0	0.0903046	0.897213	0	0.0246307	0.999957	0	-0.149684	0.655765	0	-0.215123	0.551836	0	-0.0654392	0.999975	0
A_21_P0000315	NR_002959	NR_002959	677805	small nucleolar RNA, H/ACA box 18	SNORA18	0.0720014	0.647219	0	0.0103497	0.966756	0	-0.0380378	0.779008	0	0.0984324	0.999232	0	-0.0246994	0.976836	0	0.0992633	0.684267	0	0.110039	0.831505	0	0.0483875	0.965771	0	-0.0616517	0.999957	0	-0.000830919	0.998691	0	-0.123963	0.782566	0	-0.123132	0.999975	0
A_21_P0013456	TCONS_l2_00027518	TCONS_l2_00027518				-0.124603	0.197848	0	-0.131098	0.143741	0	-0.11443	0.139939	0	-0.032642	0.999232	0	-0.0161491	0.980256	0	-0.0310191	0.891521	0	-0.0101732	0.988818	0	-0.0166679	0.982814	0	-0.00649464	0.999957	0	-0.00162287	0.997331	0	0.01487	0.972451	0	0.0164928	0.999975	0
A_23_P37005	NM_004294	NM_004294	9617	mitochondrial translation release factor 1	MTRF1	-0.0288103	0.831069	0	-0.0118841	0.948062	0	0.052944	0.570942	0	-0.0558826	0.999232	0	-0.0749967	0.844749	0	0.0155501	0.950905	0	-0.0817543	0.841236	0	-0.0648281	0.92413	0	0.0169262	0.999957	0	-0.0714327	0.825125	0	-0.0905468	0.800546	0	-0.0191142	0.999975	0
A_33_P3227252	THC2481163	THC2481163				0.0728532	0.796896	0	-0.105415	0.694851	0	-0.0734766	0.734636	0	0.0469192	0.999232	0	0.00946396	0.993639	0	-0.174936	0.658368	0	0.14633	0.871739	0	-0.0319388	0.983043	0	-0.178269	0.999957	0	0.221856	0.726098	0	0.1844	0.809393	0	-0.0374552	0.999975	0
A_24_P298495	NR_046285	NR_046285	100130744	uncharacterized LOC100130744	LOC100130744	0.0119847	0.94303	0	0.0310268	0.851915	0	0.00893216	0.949313	0	-0.0107527	0.999232	0	0.121581	0.716896	0	-0.0150297	0.956347	0	0.00305251	0.997565	0	0.0220947	0.98042	0	0.0190422	0.999957	0	0.00427697	0.992455	0	0.136611	0.704268	0	0.132334	0.999975	0
A_32_P199301	NM_007111	NM_007111	7027	transcription factor Dp-1	TFDP1	-0.0215193	0.919424	0	0.0104071	0.969808	0	0.0905182	0.471172	0	0.161044	0.999232	0	0.043337	0.955641	0	-0.178598	0.462422	0	-0.112037	0.843511	0	-0.0801111	0.936225	0	0.0319264	0.999957	0	0.339642	0.366651	0	0.221935	0.622098	0	-0.117707	0.999975	0
A_21_P0013271	NM_001195243	NM_001195243	100287482	small lysine rich protein 1	SMKR1	0.0974674	0.394242	0	0.0543052	0.686858	0	0.0560107	0.575136	0	-0.0416963	0.999232	0	-0.0159697	0.982419	0	-0.0295804	0.904948	0	0.0414567	0.9475	0	-0.00170549	0.999246	0	-0.0431622	0.999957	0	-0.0121158	0.97658	0	0.0136107	0.977208	0	0.0257265	0.999975	0
A_23_P11774	NM_016037	NM_016037	51118	UTP11, small subunit processome component	UTP11	0.147259	0.095549	0	0.0625981	0.570258	0	0.136814	0.0622427	0	0.0584907	0.999232	0	-0.0585903	0.891281	0	0.128335	0.434474	0	0.0104449	0.987981	0	-0.0742158	0.899229	0	-0.0846607	0.999957	0	-0.0698441	0.82277	0	-0.186925	0.526671	0	-0.117081	0.999975	0
A_23_P123672	NM_014290	NM_014290	23424	tudor domain containing 7	TDRD7	0.0103231	0.9648	0	0.116581	0.461455	0	0.0310473	0.853531	0	-0.0334216	0.999232	0	-0.00891026	0.992262	0	-0.0811491	0.787634	0	-0.0207242	0.983226	0	0.0855334	0.936034	0	0.106258	0.999957	0	0.0477275	0.929735	0	0.0722389	0.899704	0	0.0245113	0.999975	0
A_33_P3287562	NM_018844	NM_018844	55973	B cell receptor associated protein 29	BCAP29	0.0319741	0.875826	0	0.0824734	0.638696	0	0.0780638	0.562679	0	-0.217513	0.999232	0	-0.0750568	0.913004	0	0.0615323	0.842446	0	-0.0460897	0.961465	0	0.00440959	0.998795	0	0.0504993	0.999957	0	-0.279046	0.472467	0	-0.136589	0.790111	0	0.142457	0.999975	0
A_23_P106859	NM_006067	NM_006067	10328	ER membrane protein complex subunit 8	EMC8	0.0879119	0.255194	0	-0.0351886	0.726734	0	0.0561119	0.40013	0	0.0651408	0.999232	0	-0.132382	0.480224	0	0.0420223	0.788906	0	0.0318	0.943511	0	-0.0913005	0.855219	0	-0.123101	0.999957	0	0.0231184	0.934832	0	-0.174404	0.456385	0	-0.197522	0.999975	0
A_24_P22939	NM_213604	NM_213604	339366	ADAMTS like 5	ADAMTSL5	-0.0305515	0.886167	0	0.0732536	0.704079	0	-0.0204139	0.908997	0	-0.0557259	0.999232	0	0.07483	0.919122	0	0.0135718	0.971198	0	-0.0101377	0.994363	0	0.0936675	0.928903	0	0.103805	0.999957	0	-0.0692977	0.896367	0	0.0612582	0.916694	0	0.130556	0.999975	0
A_23_P148737	NM_004997	NM_004997	4608	myosin binding protein H	MYBPH	-0.0551653	0.820448	0	-0.203745	0.229147	0	-0.182293	0.207112	0	0.0587905	0.999232	0	0.107116	0.895565	0	0.0204338	0.964686	0	0.127128	0.867696	0	-0.0214516	0.987989	0	-0.148579	0.999957	0	0.0383567	0.957074	0	0.0866818	0.900996	0	0.048325	0.999975	0
A_23_P206760	NM_005143	NM_005143	3240	haptoglobin	HP	-0.0449119	0.862667	0	-0.0866906	0.720013	0	-0.160836	0.29486	0	0.0273408	0.999232	0	-0.0111561	0.992262	0	-0.134301	0.706542	0	0.115925	0.887458	0	0.0741459	0.961505	0	-0.0417787	0.999957	0	0.161642	0.779063	0	0.123145	0.858583	0	-0.038497	0.999975	0
A_24_P77676	NM_004134	NM_004134	3313	heat shock protein family A (Hsp70) member 9	HSPA9	-0.149954	0.202102	0	-0.120296	0.306429	0	-0.0789084	0.460979	0	-0.000228744	0.999672	0	-0.246543	0.364935	0	-0.215739	0.261821	0	-0.071046	0.898118	0	-0.0413876	0.966957	0	0.0296584	0.999957	0	0.21551	0.508445	0	-0.0308034	0.948574	0	-0.246314	0.999975	0
A_33_P3877728	BX647090	BX647090				0.0687028	0.684905	0	-0.168382	0.175283	0	-0.161698	0.124742	0	0.044752	0.999232	0	-0.258895	0.420924	0	-0.103404	0.68825	0	0.230401	0.685006	0	-0.00668441	0.996998	0	-0.237085	0.999957	0	0.148156	0.71371	0	-0.155491	0.731169	0	-0.303647	0.999975	0
A_23_P11262	NM_012151	NM_012151	8263	coagulation factor VIII associated 1	F8A1	-0.0141156	0.938215	0	-0.179683	0.0804615	0	-0.0341842	0.784515	0	-0.109338	0.999232	0	-0.209373	0.459884	0	-0.0655283	0.785247	0	0.0200686	0.981617	0	-0.145498	0.850492	0	-0.165567	0.999957	0	-0.0438096	0.919263	0	-0.143845	0.71205	0	-0.100035	0.999975	0
A_23_P145330	NM_019052	NM_019052	54535	coiled-coil alpha-helical rod protein 1	CCHCR1	0.0406907	0.784275	0	0.0475291	0.753778	0	0.0499162	0.648735	0	-0.0809317	0.999232	0	-0.0835131	0.847076	0	-0.0532521	0.820242	0	-0.00922552	0.992331	0	-0.00238714	0.999185	0	0.00683838	0.999957	0	-0.0276796	0.946865	0	-0.030261	0.945756	0	-0.0025814	0.999975	0
A_33_P3295283	NM_005768	NM_005768	10162	lysophosphatidylcholine acyltransferase 3	LPCAT3	-0.122712	0.165406	0	-0.157932	0.0454186	-1	-0.230743	0.00102111	-1	-0.0557933	0.999232	0	-0.129372	0.600239	0	-0.0987815	0.548392	0	0.108032	0.74904	0	0.0728111	0.895416	0	-0.0352205	0.999957	0	0.0429882	0.895428	0	-0.0305908	0.933496	0	-0.0735789	0.999975	0
A_33_P3262833	NR_033350	NR_033350	390535	golgin A8 family member E, pseudogene	GOLGA8EP	0.0973665	0.615949	0	0.236767	0.0943738	0	0.0336042	0.853755	0	0.242542	0.999232	0	0.14962	0.782086	0	0.0213519	0.958044	0	0.0637623	0.946556	0	0.203163	0.850492	0	0.139401	0.999957	0	0.22119	0.630046	0	0.128268	0.829782	0	-0.0929216	0.999975	0
A_33_P3651911	ENST00000560295	ENST00000560295				-0.0250771	0.895089	0	-0.173253	0.145151	0	-0.233476	0.018675	-1	0.212674	0.999232	0	-0.0469443	0.947295	0	-0.124889	0.603339	0	0.208399	0.690317	0	0.0602229	0.952279	0	-0.148176	0.999957	0	0.337564	0.341757	0	0.0779451	0.875155	0	-0.259619	0.999975	0
A_23_P168868	NM_014754	NM_014754	9791	phosphatidylserine synthase 1	PTDSS1	-0.0329273	0.787453	0	-0.0224043	0.87904	0	0.0170337	0.873807	0	-0.131493	0.999232	0	-0.0940291	0.748789	0	0.0581221	0.749732	0	-0.049961	0.91157	0	-0.0394381	0.957336	0	0.0105229	0.999957	0	-0.189615	0.439341	0	-0.152151	0.598799	0	0.0374638	0.999975	0
A_23_P377214	NM_144608	NM_144608	124790	hexamethylene bisacetamide inducible 2	HEXIM2	0.0649882	0.675593	0	-0.0995327	0.452875	0	-0.0477167	0.70552	0	0.0742699	0.999232	0	-0.113573	0.791028	0	-0.0344167	0.905409	0	0.112705	0.82043	0	-0.051816	0.959865	0	-0.164521	0.999957	0	0.108687	0.779063	0	-0.0791561	0.864741	0	-0.187843	0.999975	0
A_21_P0008857	TCONS_00024175	TCONS_00024175				-0.0474712	0.762491	0	-0.00455773	0.98596	0	-0.0357201	0.778381	0	0.156737	0.999232	0	-0.00383783	0.995165	0	-0.19689	0.31251	0	-0.0117512	0.989415	0	0.0311623	0.97266	0	0.0429135	0.999957	0	0.353627	0.279956	0	0.193052	0.611654	0	-0.160574	0.999975	0
A_21_P0012407	NM_003758	NM_003758	8669	eukaryotic translation initiation factor 3 subunit J	EIF3J	0.0602829	0.694949	0	0.022378	0.914629	0	0.0350184	0.78664	0	-0.0296105	0.999232	0	-0.0886186	0.848977	0	0.0569143	0.823655	0	0.0252645	0.978986	0	-0.0126404	0.988895	0	-0.0379049	0.999957	0	-0.0865248	0.825872	0	-0.145533	0.718527	0	-0.0590081	0.999975	0
A_33_P3407638	NM_152316	NM_152316	120534	ADP ribosylation factor like GTPase 14 effector protein	ARL14EP	0.138142	0.439926	0	0.119888	0.496291	0	0.0335907	0.854732	0	-0.156392	0.999232	0	0.296695	0.441887	0	0.126984	0.681002	0	0.104552	0.88368	0	0.0862968	0.942982	0	-0.0182548	0.999957	0	-0.283376	0.521044	0	0.169712	0.760542	0	0.453087	0.999975	0
A_23_P67932	NM_000634	NM_000634	3577	C-X-C motif chemokine receptor 1	CXCR1	-0.290119	0.0345329	-1	-0.207012	0.136375	0	-0.172676	0.155331	0	-0.0498478	0.999232	0	-0.104952	0.867476	0	0.0173673	0.964686	0	-0.117443	0.851385	0	-0.0343356	0.978128	0	0.0831073	0.999957	0	-0.0672152	0.904094	0	-0.122319	0.831092	0	-0.0551037	0.999975	0
A_23_P103720	NM_024758	NM_024758	79814	agmatinase	AGMAT	0.167794	0.0520996	0	0.0396934	0.764286	0	0.0337075	0.734127	0	0.011546	0.999232	0	-0.0450611	0.928133	0	0.0583439	0.762992	0	0.134087	0.713223	0	0.00598589	0.994851	0	-0.128101	0.999957	0	-0.0467979	0.890316	0	-0.103405	0.753486	0	-0.0566071	0.999975	0
A_23_P211056	NM_013329	NM_013329	94104	PAX3 and PAX7 binding protein 1	PAXBP1	0.054788	0.671751	0	0.068122	0.56821	0	-0.0320922	0.769662	0	0.0852361	0.999232	0	0.103937	0.759705	0	0.156382	0.366869	0	0.0868802	0.839282	0	0.100214	0.87537	0	0.013334	0.999957	0	-0.0711463	0.832943	0	-0.0524452	0.895068	0	0.018701	0.999975	0
A_19_P00317082	NR_102326	NR_102326	414777	HLA complex group 18 (non-protein coding)	HCG18	0.0531201	0.703808	0	-0.0316579	0.847624	0	-0.00467012	0.974337	0	0.0613034	0.999232	0	-0.0145607	0.98573	0	0.0360389	0.88356	0	0.0577902	0.916568	0	-0.0269878	0.974027	0	-0.084778	0.999957	0	0.0252646	0.951935	0	-0.0505996	0.904165	0	-0.0758642	0.999975	0
A_23_P22765	NM_019056	NM_019056	54539	NADH:ubiquinone oxidoreductase subunit B11	NDUFB11	0.143974	0.251836	0	0.203319	0.06177	0	0.105362	0.314284	0	0.0143701	0.999232	0	-0.00852329	0.991567	0	0.414588	0.028371	1	0.0386113	0.963544	0	0.0979572	0.896869	0	0.0593459	0.999957	0	-0.400218	0.257017	0	-0.423112	0.29957	0	-0.0228934	0.999975	0
A_21_P0012112	TCONS_l2_00016171	TCONS_l2_00016171				0.108481	0.299766	0	0.0579751	0.641242	0	0.0455428	0.648853	0	0.000245677	0.999672	0	-0.0503763	0.92053	0	0.209954	0.186548	0	0.0629384	0.889959	0	0.0124323	0.987989	0	-0.0505061	0.999957	0	-0.209708	0.442635	0	-0.26033	0.397329	0	-0.0506219	0.999975	0
A_23_P120194	NM_016467	NM_016467	94101	ORMDL sphingolipid biosynthesis regulator 1	ORMDL1	0.0131808	0.9552	0	0.145471	0.333872	0	0.149056	0.222723	0	-0.144105	0.999232	0	0.229418	0.550385	0	0.199118	0.443445	0	-0.135876	0.823092	0	-0.00358502	0.999185	0	0.132291	0.999957	0	-0.343222	0.398956	0	0.0302998	0.961461	0	0.373522	0.999975	0
A_23_P122775	NM_032730	NM_032730	84816	reticulon 4 interacting protein 1	RTN4IP1	0.0378582	0.73846	0	-0.00134146	0.99483	0	0.0307147	0.731176	0	-0.0626823	0.999232	0	-0.101629	0.697303	0	-0.0161972	0.939531	0	0.00714346	0.992331	0	-0.0320562	0.966283	0	-0.0391996	0.999957	0	-0.0464851	0.877366	0	-0.085432	0.779828	0	-0.038947	0.999975	0
A_23_P59349	NM_016217	NM_016217	51696	hdc homolog, cell cycle regulator	HECA	-0.16776	0.390803	0	-0.0415001	0.888208	0	0.100249	0.553371	0	-0.371105	0.999232	0	0.13024	0.854299	0	0.0929841	0.803642	0	-0.268009	0.708281	0	-0.141749	0.896869	0	0.12626	0.999957	0	-0.464089	0.344694	0	0.0372562	0.960261	0	0.501346	0.999975	0
A_32_P144421	NM_053042	NM_053042	85460	zinc finger protein 518B	ZNF518B	0.0468984	0.723976	0	-0.0636274	0.597931	0	0.0216345	0.853005	0	-0.124875	0.999232	0	-0.0835678	0.825773	0	-0.0172854	0.945684	0	0.0252639	0.973414	0	-0.0852619	0.888161	0	-0.110526	0.999957	0	-0.10759	0.727599	0	-0.0662825	0.862002	0	0.0413076	0.999975	0
A_23_P85783	NM_006623	NM_006623	26227	phosphoglycerate dehydrogenase	PHGDH	-0.0701971	0.666551	0	-0.0493326	0.790256	0	0.0468479	0.727207	0	-0.0983142	0.999232	0	-0.292166	0.301259	0	0.140188	0.549955	0	-0.117045	0.823092	0	-0.0961805	0.906068	0	0.0208645	0.999957	0	-0.238503	0.501432	0	-0.432354	0.309727	0	-0.193852	0.999975	0
A_33_P3225567	NM_024917	NM_024917	79979	tRNA methyltransferase 2 homolog B	TRMT2B	0.0133226	0.941081	0	-0.0649766	0.649928	0	-0.101156	0.295311	0	0.0381052	0.999232	0	0.0276948	0.969959	0	-0.0355984	0.894691	0	0.114479	0.795042	0	0.0361796	0.968684	0	-0.0782992	0.999957	0	0.0737036	0.848459	0	0.0632932	0.885657	0	-0.0104104	0.999975	0
A_19_P00321230	NR_026921	NR_026921	202181	SUMO interacting motifs containing 1 pseudogene	LOC202181	0.016356	0.914519	0	0.0362223	0.805309	0	0.079469	0.359329	0	-0.0457015	0.999232	0	0.0637864	0.886865	0	0.315049	0.0409353	1	-0.063113	0.889747	0	-0.0432467	0.958198	0	0.0198663	0.999957	0	-0.36075	0.22434	0	-0.251262	0.413802	0	0.109488	0.999975	0
A_23_P111672	NM_152829	NM_152829	26136	testin LIM domain protein	TES	0.0289903	0.875077	0	0.0248797	0.910704	0	0.149596	0.14317	0	-0.0694448	0.999232	0	0.0556858	0.936627	0	-0.126047	0.595902	0	-0.120606	0.812978	0	-0.124717	0.87537	0	-0.00411059	0.999957	0	0.056602	0.904391	0	0.181733	0.665958	0	0.125131	0.999975	0
A_33_P3328511	NM_001039083	NM_001039083	100506084	ADP ribosylation factor like GTPase 17B	ARL17B	0.045263	0.76309	0	0.0199999	0.920624	0	-0.0675017	0.518639	0	0.0538883	0.999232	0	-0.0677263	0.896433	0	0.0711791	0.756282	0	0.112765	0.794672	0	0.0875017	0.90003	0	-0.025263	0.999957	0	-0.0172908	0.969225	0	-0.138905	0.715355	0	-0.121615	0.999975	0
A_23_P418493	NM_145691	NM_145691	91647	ATP synthase mitochondrial F1 complex assembly factor 2	ATPAF2	-0.063788	0.596369	0	-0.00284744	0.988702	0	-0.0757387	0.380212	0	0.0240446	0.999232	0	-0.212383	0.337593	0	0.0272375	0.907581	0	0.0119508	0.986738	0	0.0728913	0.908064	0	0.0609405	0.999957	0	-0.00319292	0.994165	0	-0.23962	0.432462	0	-0.236428	0.999975	0
A_33_P3360675	NM_001164761	NM_001164761	5575	protein kinase cAMP-dependent type I regulatory subunit beta	PRKAR1B	-0.0435505	0.805729	0	0.0149868	0.950183	0	-0.0624007	0.622145	0	0.198592	0.999232	0	-0.116033	0.798024	0	-0.217883	0.306377	0	0.0188501	0.982652	0	0.0773874	0.935432	0	0.0585373	0.999957	0	0.416476	0.257207	0	0.101851	0.834973	0	-0.314625	0.999975	0
A_23_P217028	NM_001008563	NM_001008563	10868	ubiquitin specific peptidase 20	USP20	-0.0690535	0.574957	0	-0.0210666	0.90478	0	-0.0247953	0.829855	0	-0.0475658	0.999232	0	0.0108258	0.989756	0	0.0743243	0.711753	0	-0.0442582	0.939131	0	0.00372873	0.998511	0	0.0479869	0.999957	0	-0.12189	0.690156	0	-0.0634985	0.870976	0	0.0583916	0.999975	0
A_32_P514599	THC2537477	THC2537477				0.0149819	0.943588	0	0.239862	0.0424927	1	0.0226557	0.889524	0	0.116605	0.999232	0	0.0093706	0.991567	0	0.0733216	0.794968	0	-0.00767381	0.995009	0	0.217206	0.835508	0	0.22488	0.999957	0	0.0432832	0.932334	0	-0.063951	0.903763	0	-0.107234	0.999975	0
A_23_P125204	NM_001004464	NM_001004464	219869	olfactory receptor family 10 subfamily G member 8	OR10G8	0.0209756	0.929931	0	0.108405	0.536957	0	-0.0377375	0.827574	0	0.0665427	0.999232	0	-0.153049	0.768808	0	0.0683162	0.837608	0	0.0587131	0.950683	0	0.146143	0.876296	0	0.0874298	0.999957	0	-0.00177346	0.998508	0	-0.221366	0.660974	0	-0.219592	0.999975	0
A_23_P211136	NM_018963	NM_018963	54014	bromodomain and WD repeat domain containing 1	BRWD1	-0.0689109	0.615881	0	0.0550475	0.707389	0	0.0244755	0.848416	0	0.114253	0.999232	0	0.101275	0.794975	0	0.0718395	0.749693	0	-0.0933865	0.841236	0	0.030572	0.971615	0	0.123958	0.999957	0	0.0424136	0.919102	0	0.029435	0.947627	0	-0.0129786	0.999975	0
A_21_P0011496	NM_001025195	NM_001025195	1066	carboxylesterase 1	CES1	-0.266845	0.049739	-1	0.00239734	0.99483	0	-0.187301	0.111429	0	-0.00998305	0.999232	0	-0.0262991	0.979788	0	-0.0999258	0.738753	0	-0.079544	0.917892	0	0.189698	0.850492	0	0.269242	0.999957	0	0.0899428	0.858356	0	0.0736267	0.899955	0	-0.0163161	0.999975	0
A_33_P3285038	NM_001281731	NM_001281731	91012	ceramide synthase 5	CERS5	-0.0559893	0.630618	0	-0.0342522	0.802175	0	-0.0039044	0.975462	0	-0.0508316	0.999232	0	0.0453918	0.924684	0	-0.00799287	0.972822	0	-0.0520849	0.91157	0	-0.0303478	0.968533	0	0.0217371	0.999957	0	-0.0428387	0.90049	0	0.0533846	0.88179	0	0.0962234	0.999975	0
A_33_P3243343	A_33_P3243343	A_33_P3243343				0.0229491	0.884892	0	0.108467	0.321972	0	-0.0841399	0.374525	0	0.0369203	0.999232	0	-0.143096	0.642235	0	0.126198	0.520231	0	0.107089	0.796538	0	0.192607	0.827784	0	0.0855179	0.999957	0	-0.0892782	0.799258	0	-0.269295	0.420142	0	-0.180016	0.999975	0
A_23_P111635	NM_016086	NM_016086	51657	serine/threonine/tyrosine interacting like 1	STYXL1	-0.0321764	0.750344	0	-0.0134938	0.920164	0	-0.0507277	0.459181	0	0.0412112	0.999232	0	-0.147262	0.420924	0	0.0362245	0.823087	0	0.0185513	0.974351	0	0.0372339	0.948666	0	0.0186826	0.999957	0	0.00498671	0.987315	0	-0.183487	0.432312	0	-0.188473	0.999975	0
A_21_P0006828	TCONS_00018111	TCONS_00018111				-0.0926335	0.335256	0	-0.0132721	0.934758	0	-0.0133811	0.901111	0	-0.0318363	0.999232	0	-0.0465896	0.916677	0	-0.0344838	0.863109	0	-0.0792524	0.831505	0	0.000109062	0.999868	0	0.0793615	0.999957	0	0.00264756	0.994475	0	-0.0121058	0.976266	0	-0.0147534	0.999975	0
A_33_P3404189	NM_032450	NM_032450	727957	maestro heat like repeat family member 1	MROH1	0.0817433	0.576906	0	0.0944488	0.479562	0	0.0588755	0.622145	0	0.115342	0.999232	0	0.0693029	0.903498	0	0.072719	0.77077	0	0.0228678	0.980079	0	0.0355733	0.969487	0	0.0127055	0.999957	0	0.0426232	0.92581	0	-0.00341613	0.9946	0	-0.0460393	0.999975	0
A_21_P0010303	TCONS_00029182	TCONS_00029182				0.133219	0.557248	0	0.0437811	0.888707	0	0.0565415	0.78311	0	0.0420625	0.999232	0	0.0297727	0.982269	0	-0.250849	0.451999	0	0.076677	0.946556	0	-0.0127604	0.994198	0	-0.0894374	0.999957	0	0.292912	0.588434	0	0.280622	0.649486	0	-0.0122898	0.999975	0
A_33_P3363316	NR_015401	NR_015401	255031	long intergenic non-protein coding RNA 957	LINC00957	-0.0835017	0.622919	0	-0.0219828	0.928553	0	-0.0212581	0.896778	0	0.00919975	0.999232	0	-0.321373	0.283742	0	-0.0657653	0.822755	0	-0.0622436	0.935332	0	-0.000724738	0.999851	0	0.0615189	0.999957	0	0.0749651	0.876626	0	-0.255608	0.558526	0	-0.330573	0.999975	0
A_21_P0011656	ENST00000534258	ENST00000534258				-0.0797734	0.611815	0	-0.106555	0.437175	0	-0.114206	0.287794	0	0.0197765	0.999232	0	-0.0716526	0.905491	0	-0.0717553	0.786801	0	0.0344322	0.971216	0	0.00765087	0.995523	0	-0.0267813	0.999957	0	0.0915317	0.828354	0	0.000102716	0.999761	0	-0.091429	0.999975	0
A_33_P3344618	NM_007162	NM_007162	7942	transcription factor EB	TFEB	0.0791575	0.63889	0	-0.0978404	0.521698	0	-0.00895914	0.960971	0	0.121861	0.999232	0	-0.109174	0.832832	0	-0.203168	0.377218	0	0.0881167	0.88368	0	-0.0888813	0.925908	0	-0.176998	0.999957	0	0.325029	0.377375	0	0.093994	0.85495	0	-0.231035	0.999975	0
A_19_P00322592	ENST00000585822	ENST00000585822				0.0448061	0.845043	0	0.0217334	0.941686	0	-0.0248779	0.898043	0	-0.0517351	0.999232	0	0.18134	0.722136	0	-0.17693	0.551699	0	0.069684	0.940617	0	0.0466113	0.969487	0	-0.0230727	0.999957	0	0.125195	0.816514	0	0.35827	0.484393	0	0.233075	0.999975	0
A_21_P0010674	TCONS_l2_00001808	TCONS_l2_00001808				-0.0122335	0.957645	0	0.000557276	0.998863	0	-0.20428	0.0736576	0	0.174325	0.999232	0	0.162557	0.721927	0	-0.163524	0.538145	0	0.192047	0.73574	0	0.204838	0.84917	0	0.0127908	0.999957	0	0.337849	0.397997	0	0.326081	0.47482	0	-0.0117681	0.999975	0
A_23_P27840	NM_003169	NM_003169	6829	SPT5 homolog, DSIF elongation factor subunit	SUPT5H	-0.167947	0.152204	0	-0.107528	0.397569	0	-0.223559	0.0164545	-1	-0.075137	0.999232	0	-0.128319	0.743891	0	-0.159462	0.452845	0	0.0556123	0.93477	0	0.116032	0.876296	0	0.0604194	0.999957	0	0.0843249	0.832612	0	0.0311431	0.94956	0	-0.0531817	0.999975	0
A_23_P76969	NM_015556	NM_015556	26037	signal induced proliferation associated 1 like 1	SIPA1L1	-0.161981	0.280766	0	-0.282629	0.0233557	-1	-0.262587	0.018933	-1	-0.160412	0.999232	0	-0.229052	0.544216	0	-0.263668	0.26509	0	0.100605	0.876179	0	-0.0200423	0.986079	0	-0.120648	0.999957	0	0.103256	0.829144	0	0.0346157	0.954226	0	-0.0686398	0.999975	0
A_33_P3391429	NM_024836	NM_024836	79894	zinc finger protein 672	ZNF672	-0.0682696	0.615949	0	-0.0237127	0.899401	0	0.0154592	0.907601	0	0.0174013	0.999232	0	-0.0480103	0.936763	0	0.187881	0.303134	0	-0.0837288	0.855625	0	-0.0391719	0.966705	0	0.0445569	0.999957	0	-0.170479	0.588042	0	-0.235891	0.496668	0	-0.0654116	0.999975	0
A_23_P12082	NM_001025199	NM_001025199	1117	chitinase 3 like 2	CHI3L2	0.213208	0.036786	1	0.128297	0.237792	0	0.132865	0.139874	0	0.0634627	0.999232	0	0.0678232	0.896797	0	0.320265	0.0655001	0	0.080343	0.870387	0	-0.00456781	0.998084	0	-0.0849108	0.999957	0	-0.256803	0.406156	0	-0.252442	0.473523	0	0.00436054	0.999975	0
A_33_P3330109	NM_001243042	NM_001243042	3107	major histocompatibility complex, class I, C	HLA-C	-0.0851246	0.678673	0	-0.155632	0.345137	0	-0.14379	0.292268	0	-0.0883392	0.999232	0	-0.24203	0.573544	0	-0.00644507	0.989704	0	0.0586653	0.952771	0	-0.0118421	0.993071	0	-0.0705074	0.999957	0	-0.0818941	0.887778	0	-0.235585	0.656358	0	-0.15369	0.999975	0
A_21_P0010313	TCONS_00029224	TCONS_00029224				0.063029	0.790349	0	0.0744559	0.758124	0	0.019451	0.930332	0	-0.0521709	0.999232	0	0.196502	0.717323	0	-0.212248	0.492795	0	0.0435779	0.973414	0	0.0550048	0.968684	0	0.0114269	0.999957	0	0.160078	0.770972	0	0.40875	0.446384	0	0.248673	0.999975	0
A_19_P00807643	NR_027252	NR_027252	285154	CYP1B1 antisense RNA 1	CYP1B1-AS1	-0.136752	0.328197	0	-0.179921	0.139043	0	-0.144902	0.175832	0	-0.0782593	0.999232	0	-0.106256	0.833913	0	-0.299947	0.146127	0	0.00814956	0.994942	0	-0.0350193	0.97266	0	-0.0431689	0.999957	0	0.221688	0.549232	0	0.193691	0.652667	0	-0.0279967	0.999975	0
A_33_P3356816	NM_178349	NM_178349	353132	late cornified envelope 1B	LCE1B	0.120918	0.541499	0	0.16333	0.335864	0	-0.00123023	0.995126	0	0.0957688	0.999232	0	-0.0917645	0.908503	0	0.158694	0.613305	0	0.122149	0.862664	0	0.164561	0.87518	0	0.042412	0.999957	0	-0.0629252	0.919704	0	-0.250459	0.64541	0	-0.187533	0.999975	0
A_33_P3355055	NM_001278378	NM_001278378	51329	ADP ribosylation factor like GTPase 6 interacting protein 4	ARL6IP4	0.0982437	0.508849	0	0.196116	0.0851675	0	0.0247011	0.870393	0	0.0285009	0.999232	0	0.0613111	0.925994	0	0.575274	0.00485705	1	0.0735426	0.906352	0	0.171414	0.850038	0	0.0978719	0.999957	0	-0.546774	0.170259	0	-0.513963	0.247966	0	0.0328102	0.999975	0
A_23_P70095	NM_001025158	NM_001025158	972	CD74 molecule	CD74	-0.287651	0.0382221	-1	-0.0144709	0.961462	0	-0.0343731	0.845037	0	-0.218041	0.999232	0	-0.260986	0.496328	0	0.160379	0.56715	0	-0.253278	0.68745	0	0.0199022	0.987399	0	0.273181	0.999957	0	-0.37842	0.365855	0	-0.421365	0.371031	0	-0.0429455	0.999975	0
A_23_P114952	NM_016456	NM_016456	252839	transmembrane protein 9	TMEM9	0.0975468	0.0967483	0	0.0963379	0.0848708	0	0.102316	0.0350334	1	0.086348	0.999232	0	0.0819876	0.644501	0	0.0864483	0.426622	0	-0.00476934	0.992987	0	-0.00597818	0.989791	0	-0.00120884	0.999957	0	-0.000100308	0.999521	0	-0.00446078	0.986481	0	-0.00436047	0.999975	0
A_21_P0007158	ENST00000457725	ENST00000457725				0.110121	0.46668	0	0.0986647	0.504635	0	0.106136	0.35291	0	0.0885945	0.999232	0	-0.0491837	0.946367	0	0.190069	0.403103	0	0.00398549	0.997241	0	-0.0074711	0.995732	0	-0.0114566	0.999957	0	-0.101475	0.816921	0	-0.239253	0.572501	0	-0.137778	0.999975	0
A_23_P109442	NM_022081	NM_022081	89781	HPS4, biogenesis of lysosomal organelles complex 3 subunit 2	HPS4	-0.0221074	0.883056	0	-0.0950934	0.374632	0	-0.00705583	0.9596	0	-0.0644072	0.999232	0	-0.0893826	0.812624	0	-0.22131	0.175712	0	-0.0150516	0.982652	0	-0.0880375	0.888161	0	-0.072986	0.999957	0	0.156903	0.595435	0	0.131928	0.70206	0	-0.0249754	0.999975	0
A_21_P0011340	NR_038273	NR_038273	100506874	long intergenic non-protein coding RNA 933	LINC00933	0.0175897	0.936453	0	0.00100216	0.997545	0	0.033288	0.833607	0	0.0680421	0.999232	0	-0.26033	0.441887	0	-0.272804	0.223431	0	-0.0156983	0.987981	0	-0.0322858	0.977612	0	-0.0165876	0.999957	0	0.340846	0.371024	0	0.0124739	0.98444	0	-0.328372	0.999975	0
A_24_P387609	NM_030940	NM_030940	81689	iron-sulfur cluster assembly 1	ISCA1	0.0664792	0.669762	0	0.0418126	0.819328	0	0.0622147	0.60208	0	0.405598	0.495024	0	0.0213579	0.979788	0	-0.109955	0.636709	0	0.00426449	0.996805	0	-0.0204021	0.982814	0	-0.0246666	0.999957	0	0.515553	0.173952	0	0.131313	0.760722	0	-0.38424	0.999975	0
A_33_P3265855	NM_181334	NM_181334	553158	PRR5-ARHGAP8 readthrough	PRR5-ARHGAP8	0.14194	0.166298	0	0.0879615	0.43328	0	0.0273415	0.813145	0	0.0744197	0.999232	0	-0.166701	0.534545	0	-0.110118	0.564486	0	0.114598	0.772104	0	0.06062	0.936341	0	-0.0539784	0.999957	0	0.184538	0.527934	0	-0.0565833	0.887332	0	-0.241121	0.999975	0
A_23_P164022	NM_033375	NM_033375	4641	myosin IC	MYO1C	-0.108528	0.348257	0	-0.140507	0.163922	0	-0.1679	0.0457666	-1	-0.0133501	0.999232	0	0.0551562	0.919122	0	0.00829533	0.976661	0	0.0593723	0.913907	0	0.0273933	0.974027	0	-0.031979	0.999957	0	-0.0216454	0.960653	0	0.0468609	0.911929	0	0.0685063	0.999975	0
A_23_P110606	NM_014757	NM_014757	9794	mastermind like transcriptional coactivator 1	MAML1	-0.143003	0.132105	0	-0.093459	0.355568	0	-0.0216371	0.84923	0	-0.0296833	0.999232	0	-0.0124369	0.986816	0	0.0156853	0.950905	0	-0.121366	0.748068	0	-0.0718219	0.908337	0	0.0495439	0.999957	0	-0.0453685	0.90026	0	-0.0281222	0.943884	0	0.0172464	0.999975	0
A_33_P3249872	NM_001996	NM_001996	2192	fibulin 1	FBLN1	0.0651873	0.741667	0	0.0216373	0.935507	0	0.0399224	0.805889	0	0.0623303	0.999232	0	-0.0564396	0.945127	0	-0.0344492	0.923854	0	0.0252648	0.981617	0	-0.0182851	0.987989	0	-0.04355	0.999957	0	0.0967795	0.845668	0	-0.0219904	0.97329	0	-0.11877	0.999975	0
A_33_P3304883	XR_171616	XR_171616				0.0430173	0.883056	0	-0.0036233	0.99371	0	0.0303035	0.899204	0	0.0851901	0.999232	0	-0.0679986	0.95108	0	-0.178252	0.640133	0	0.0127139	0.994836	0	-0.0339268	0.982814	0	-0.0466406	0.999957	0	0.263442	0.656389	0	0.110254	0.886184	0	-0.153189	0.999975	0
A_23_P3042	NM_006246	NM_006246	5529	protein phosphatase 2 regulatory subunit B'epsilon	PPP2R5E	0.0929349	0.492555	0	0.107083	0.376561	0	0.0570926	0.618615	0	-0.0939788	0.999232	0	0.106923	0.7941	0	0.0927034	0.683905	0	0.0358423	0.964479	0	0.0499903	0.959176	0	0.0141479	0.999957	0	-0.186682	0.571404	0	0.0142195	0.977918	0	0.200902	0.999975	0
A_24_P331904	NM_017828	NM_017828	54939	COMM domain containing 4	COMMD4	0.159848	0.0927991	0	0.0664293	0.579064	0	0.0220079	0.850933	0	0.00884317	0.999232	0	-0.181591	0.467473	0	0.1464	0.401256	0	0.13784	0.719429	0	0.0444214	0.957436	0	-0.093419	0.999957	0	-0.137557	0.645023	0	-0.327991	0.313611	0	-0.190434	0.999975	0
A_24_P97374	NM_005442	NM_005442	8320	eomesodermin	EOMES	0.0626254	0.668282	0	-0.0398791	0.81571	0	-0.0138233	0.923961	0	0.0730846	0.999232	0	-0.125457	0.733695	0	0.0654913	0.785157	0	0.0764487	0.882686	0	-0.0260558	0.978149	0	-0.102505	0.999957	0	0.00759325	0.987315	0	-0.190948	0.607578	0	-0.198542	0.999975	0
A_23_P110062	NM_003907	NM_003907	8893	eukaryotic translation initiation factor 2B subunit epsilon	EIF2B5	-0.142232	0.237064	0	-0.0381195	0.831541	0	-0.019374	0.891974	0	-0.0676569	0.999232	0	-0.156931	0.641041	0	0.172521	0.39755	0	-0.122858	0.787891	0	-0.0187455	0.982814	0	0.104113	0.999957	0	-0.240178	0.459077	0	-0.329452	0.371031	0	-0.0892743	0.999975	0
A_23_P11295	NM_001018024	NM_001018024	100272147	C-X9-C motif containing 4	CMC4	0.161681	0.0179652	1	0.105904	0.128997	0	0.111509	0.0600647	0	0.0271686	0.999232	0	0.105658	0.617976	0	0.140677	0.255167	0	0.0501724	0.88368	0	-0.00560455	0.993071	0	-0.055777	0.999957	0	-0.113508	0.60335	0	-0.035019	0.906487	0	0.0784891	0.999975	0
A_23_P121716	NM_005139	NM_005139	306	annexin A3	ANXA3	0.0785771	0.803801	0	-0.020091	0.964209	0	0.144832	0.492868	0	0.130381	0.999232	0	0.242385	0.746276	0	0.323426	0.415519	0	-0.0662552	0.967666	0	-0.164923	0.910726	0	-0.0986681	0.999957	0	-0.193045	0.794527	0	-0.0810408	0.930135	0	0.112004	0.999975	0
A_24_P83586	NM_015506	NM_015506	25974	methylmalonic aciduria (cobalamin deficiency) cblC type, with homocystinuria	MMACHC	0.0708782	0.649982	0	-0.0110621	0.96313	0	0.044223	0.734372	0	0.111472	0.999232	0	-0.115031	0.792745	0	0.144878	0.517691	0	0.0266552	0.978717	0	-0.0552852	0.95529	0	-0.0819404	0.999957	0	-0.0334056	0.943258	0	-0.259909	0.504495	0	-0.226503	0.999975	0
A_24_P927474	A_24_P927474	A_24_P927474				0.115582	0.48126	0	0.0806904	0.651208	0	0.0332376	0.837826	0	0.124469	0.999232	0	0.0505656	0.949071	0	0.109752	0.693716	0	0.0823449	0.906352	0	0.0474528	0.968008	0	-0.0348921	0.999957	0	0.0147172	0.979539	0	-0.0591865	0.917241	0	-0.0739037	0.999975	0
A_21_P0013818	TCONS_l2_00030522	TCONS_l2_00030522				0.100389	0.74208	0	0.0596216	0.871724	0	-0.0524113	0.842539	0	0.00481824	0.999232	0	-0.0460416	0.975778	0	-0.158501	0.729923	0	0.152801	0.882686	0	0.112033	0.950282	0	-0.0407678	0.999957	0	0.163319	0.829144	0	0.112459	0.901078	0	-0.0508599	0.999975	0
A_23_P397376	NM_001031804	NM_001031804	4094	MAF bZIP transcription factor	MAF	-0.000543485	0.998153	0	-0.110062	0.277685	0	0.0400123	0.707458	0	-0.0563476	0.999232	0	-0.136518	0.64101	0	-0.0707256	0.731916	0	-0.0405558	0.948092	0	-0.150075	0.83957	0	-0.109519	0.999957	0	0.0143779	0.972249	0	-0.0657925	0.867387	0	-0.0801704	0.999975	0
A_33_P3312877	NM_174923	NM_174923	203260	coiled-coil domain containing 107	CCDC107	0.148639	0.237435	0	0.157301	0.17606	0	0.0294479	0.834623	0	0.0495706	0.999232	0	0.0156256	0.986816	0	0.294421	0.125883	0	0.119191	0.80774	0	0.127853	0.873679	0	0.00866279	0.999957	0	-0.24485	0.471665	0	-0.278795	0.472753	0	-0.033945	0.999975	0
A_33_P3259253	NM_006139	NM_006139	940	CD28 molecule	CD28	0.0638905	0.622012	0	0.111076	0.281616	0	0.0737266	0.430323	0	0.0218495	0.999232	0	-0.0215312	0.975151	0	0.031472	0.898702	0	-0.00983617	0.989441	0	0.0373498	0.966456	0	0.047186	0.999957	0	-0.00962254	0.982334	0	-0.0530032	0.89704	0	-0.0433807	0.999975	0
A_33_P3286973	ENST00000339381	ENST00000339381				0.229135	0.305001	0	0.289421	0.140395	0	-0.130961	0.506512	0	0.262284	0.999232	0	0.269515	0.66549	0	-0.0913424	0.843771	0	0.360096	0.685006	0	0.420382	0.827784	0	0.0602863	0.999957	0	0.353626	0.554828	0	0.360858	0.597601	0	0.00723163	0.999975	0
A_33_P3220437	NM_001167942	NM_001167942	126282	TNF alpha induced protein 8 like 1	TNFAIP8L1	0.0199918	0.943737	0	0.00386668	0.992033	0	-0.38001	0.00645255	-1	0.160879	0.999232	0	0.115908	0.88546	0	-0.145792	0.679914	0	0.400002	0.685006	0	0.383877	0.827784	0	-0.0161251	0.999957	0	0.306671	0.545696	0	0.2617	0.659591	0	-0.0449712	0.999975	0
A_21_P0004289	TCONS_00010078	TCONS_00010078				-0.0255033	0.874909	0	0.0680739	0.619523	0	-0.118944	0.194139	0	0.0219782	0.999232	0	0.00789063	0.991567	0	-0.0597354	0.798838	0	0.0934402	0.84288	0	0.187017	0.830643	0	0.0935772	0.999957	0	0.0817136	0.825872	0	0.0676261	0.875976	0	-0.0140875	0.999975	0
A_33_P3356607	NM_001033518	NM_001033518	26100	WD repeat domain, phosphoinositide interacting 2	WIPI2	-0.0801511	0.531864	0	-0.153188	0.124227	0	-0.148716	0.0814543	0	-0.0682765	0.999232	0	-0.127571	0.705757	0	-0.177401	0.331001	0	0.0685651	0.889959	0	-0.00447217	0.998063	0	-0.0730373	0.999957	0	0.109124	0.748016	0	0.0498291	0.906579	0	-0.0592949	0.999975	0
A_23_P217917	NM_147148	NM_147148	2948	glutathione S-transferase mu 4	GSTM4	0.0853083	0.64826	0	0.00665034	0.983077	0	0.0588882	0.702575	0	-0.0431394	0.999232	0	-0.157755	0.744854	0	0.0818385	0.791222	0	0.0264201	0.981404	0	-0.0522379	0.966957	0	-0.078658	0.999957	0	-0.124978	0.794786	0	-0.239594	0.622098	0	-0.114616	0.999975	0
A_23_P201790	NM_002481	NM_002481	4660	protein phosphatase 1 regulatory subunit 12B	PPP1R12B	-0.169129	0.245905	0	-0.393833	0.000790187	-1	-0.100583	0.431339	0	-0.0680589	0.999232	0	0.144774	0.762206	0	-0.06294	0.839013	0	-0.0685461	0.930318	0	-0.29325	0.827784	0	-0.224704	0.999957	0	-0.00511892	0.993632	0	0.207714	0.657691	0	0.212833	0.999975	0
A_24_P418044	NR_024240	NR_024240	3137	major histocompatibility complex, class I, J (pseudogene)	HLA-J	-0.171599	0.212342	0	-0.102767	0.504435	0	-0.105119	0.383142	0	-0.120133	0.999232	0	-0.137234	0.768808	0	0.153968	0.539499	0	-0.0664808	0.928849	0	0.00235186	0.999246	0	0.0688327	0.999957	0	-0.2741	0.466881	0	-0.291201	0.499842	0	-0.017101	0.999975	0
A_24_P192627	NM_004529	NM_004529	4300	MLLT3, super elongation complex subunit	MLLT3	0.0527928	0.704401	0	-0.0223786	0.903016	0	0.140657	0.0953334	0	-0.163524	0.999232	0	-0.0747491	0.866397	0	0.124554	0.518286	0	-0.0878646	0.84288	0	-0.163036	0.835508	0	-0.0751714	0.999957	0	-0.288077	0.327195	0	-0.199303	0.558526	0	0.0887747	0.999975	0
A_23_P205074	NM_181785	NM_181785	283537	solute carrier family 46 member 3	SLC46A3	0.115697	0.295387	0	0.0757881	0.529818	0	-0.0066692	0.962958	0	0.137689	0.999232	0	0.0817361	0.843117	0	0.00435482	0.9894	0	0.122366	0.760448	0	0.0824573	0.90003	0	-0.0399091	0.999957	0	0.133335	0.670881	0	0.0773813	0.848394	0	-0.0559533	0.999975	0
A_33_P3416366	NM_005483	NM_005483	10036	chromatin assembly factor 1 subunit A	CHAF1A	-0.0968316	0.600155	0	0.0363407	0.883659	0	-0.0843873	0.556812	0	-0.111693	0.999232	0	-0.158679	0.748015	0	-0.108144	0.718885	0	-0.0124443	0.992487	0	0.120728	0.896869	0	0.133172	0.999957	0	-0.00354904	0.995126	0	-0.050535	0.934063	0	-0.046986	0.999975	0
A_21_P0000908	NR_033981	NR_033981	400761	LRRC8C divergent transcript	LRRC8C-DT	-0.0151259	0.911825	0	0.0483423	0.675248	0	0.0732771	0.3464	0	0.0703236	0.999232	0	-0.00625086	0.991567	0	0.0738479	0.673151	0	-0.088403	0.798795	0	-0.0249348	0.971345	0	0.0634682	0.999957	0	-0.00352425	0.992635	0	-0.0800987	0.810609	0	-0.0765745	0.999975	0
A_23_P100795	NM_213662	NM_213662	6774	signal transducer and activator of transcription 3	STAT3	-0.238361	0.0132222	-1	-0.123929	0.229147	0	-0.168869	0.0430147	-1	-0.0182463	0.999232	0	-0.0555891	0.916501	0	-0.0473733	0.838982	0	-0.069492	0.885069	0	0.0449399	0.960658	0	0.114432	0.999957	0	0.0291271	0.942844	0	-0.00821575	0.985781	0	-0.0373428	0.999975	0
A_23_P3453	NM_015540	NM_015540	26015	RNA polymerase II associated protein 1	RPAP1	-0.0775758	0.524945	0	-0.173086	0.0594142	0	-0.200557	0.0121164	-1	-0.0896172	0.999232	0	-0.225536	0.323786	0	-0.311582	0.0503343	0	0.122981	0.753668	0	0.0274711	0.972716	0	-0.0955099	0.999957	0	0.221965	0.43457	0	0.0860456	0.826479	0	-0.135919	0.999975	0
A_23_P27822	NM_018025	NM_018025	55094	G-patch domain containing 1	GPATCH1	0.00184822	0.992927	0	-0.0759824	0.525123	0	0.00524671	0.971178	0	0.0259502	0.999232	0	-0.135631	0.654029	0	-0.10122	0.607944	0	-0.00339849	0.99721	0	-0.0812291	0.90086	0	-0.0778306	0.999957	0	0.127171	0.686578	0	-0.0344109	0.935121	0	-0.161582	0.999975	0
A_23_P101811	NM_021030	NM_021030	7561	zinc finger protein 14	ZNF14	0.0333565	0.812565	0	0.0813812	0.467588	0	0.137355	0.0873504	0	-0.0519888	0.999232	0	0.190312	0.441887	0	0.229027	0.153966	0	-0.103998	0.792672	0	-0.0559737	0.942982	0	0.0480247	0.999957	0	-0.281016	0.316967	0	-0.0387157	0.924081	0	0.242301	0.999975	0
A_23_P211738	NM_014517	NM_014517	7342	upstream binding protein 1	UBP1	-7.20395e-05	0.999416	0	0.0809203	0.665552	0	0.0884205	0.521339	0	-0.0156787	0.999232	0	0.0572668	0.943877	0	-0.116123	0.687156	0	-0.0884926	0.899272	0	-0.00750027	0.996839	0	0.0809923	0.999957	0	0.100444	0.838702	0	0.17339	0.731698	0	0.0729456	0.999975	0
A_23_P26468	NM_001278720	NM_001278720	9028	rhomboid like 1	RHBDL1	-0.131691	0.766017	0	0.402705	0.197385	0	-0.00685381	0.989026	0	0.141556	0.999232	0	-0.180887	0.909737	0	-0.604699	0.260989	0	-0.124837	0.951471	0	0.409559	0.850492	0	0.534396	0.999957	0	0.746255	0.409568	0	0.423812	0.700467	0	-0.322443	0.999975	0
A_23_P121702	NM_001014446	NM_001014446	132299	OCIA domain containing 2	OCIAD2	0.261454	0.0126923	1	0.151105	0.167993	0	0.21919	0.0152887	1	-0.0148189	0.999232	0	0.0537149	0.931892	0	0.218346	0.250852	0	0.0422645	0.953071	0	-0.0680843	0.936225	0	-0.110349	0.999957	0	-0.233165	0.467142	0	-0.164631	0.670375	0	0.0685338	0.999975	0
A_23_P85240	NM_016562	NM_016562	51284	toll like receptor 7	TLR7	0.00505356	0.982776	0	0.148316	0.269647	0	0.0172569	0.919164	0	-0.0615596	0.999232	0	-0.0593562	0.937245	0	-0.0837242	0.765142	0	-0.0122033	0.991029	0	0.131059	0.876296	0	0.143262	0.999957	0	0.0221646	0.968454	0	0.024368	0.967718	0	0.00220342	0.999975	0
A_24_P417352	ENST00000390559	ENST00000390559				-0.297744	0.0866459	0	-0.13441	0.524681	0	-0.0974883	0.586216	0	-0.249996	0.999232	0	-0.30592	0.518601	0	-0.0826173	0.837807	0	-0.200256	0.777017	0	-0.0369212	0.980712	0	0.163335	0.999957	0	-0.167379	0.775854	0	-0.223303	0.724472	0	-0.0559237	0.999975	0
A_23_P103503	NM_002393	NM_002393	4194	MDM4, p53 regulator	MDM4	-0.0737911	0.45517	0	-0.034707	0.777908	0	-0.0539663	0.499276	0	0.00780068	0.999232	0	0.044982	0.916042	0	0.0448661	0.805201	0	-0.0198248	0.976348	0	0.0192593	0.978506	0	0.0390841	0.999957	0	-0.0370654	0.908012	0	0.000115898	0.999653	0	0.0371813	0.999975	0
A_23_P350234	NM_001012989	NM_001012989	389898	ubiquitin conjugating enzyme E2 N like (gene/pseudogene)	UBE2NL	0.138247	0.277509	0	0.154734	0.181877	0	0.0643419	0.587477	0	0.158469	0.999232	0	-0.00733461	0.992262	0	0.0828305	0.738787	0	0.0739055	0.89908	0	0.0903917	0.908064	0	0.0164862	0.999957	0	0.0756383	0.856246	0	-0.0901651	0.848017	0	-0.165803	0.999975	0
A_21_P0000028	NM_001161444	NM_001161444	9047	SH2 domain containing 2A	SH2D2A	0.0150035	0.921954	0	-0.0514664	0.686523	0	-0.0666502	0.455189	0	0.11822	0.999232	0	-0.0767975	0.841903	0	0.0867437	0.64424	0	0.0816537	0.84288	0	0.0151838	0.983257	0	-0.0664699	0.999957	0	0.0314759	0.932334	0	-0.163541	0.607578	0	-0.195017	0.999975	0
A_33_P3276062	A_33_P3276062	A_33_P3276062				-0.20338	0.0912082	0	0.0550225	0.758278	0	-0.0311755	0.83028	0	-0.0671408	0.999232	0	0.133212	0.752712	0	-0.151752	0.512576	0	-0.172204	0.728836	0	0.0861981	0.921697	0	0.258403	0.999957	0	0.0846112	0.844421	0	0.284964	0.479088	0	0.200353	0.999975	0
A_23_P152125	NM_002461	NM_002461	4597	mevalonate diphosphate decarboxylase	MVD	-0.121381	0.327225	0	0.0398938	0.819185	0	-0.0631468	0.572342	0	0.0710342	0.999232	0	0.0122964	0.989756	0	0.182999	0.354174	0	-0.0582337	0.925272	0	0.103041	0.885246	0	0.161274	0.999957	0	-0.111965	0.760892	0	-0.170703	0.655517	0	-0.0587378	0.999975	0
A_33_P3216427	NM_001347	NM_001347	1609	diacylglycerol kinase theta	DGKQ	-0.0334413	0.824694	0	-0.0678072	0.607319	0	-0.0404581	0.721582	0	-0.054559	0.999232	0	-0.0841449	0.843117	0	-0.083332	0.697377	0	0.00701681	0.994831	0	-0.0273492	0.974101	0	-0.034366	0.999957	0	0.028773	0.944664	0	-0.000812897	0.998366	0	-0.0295859	0.999975	0
A_23_P211212	NM_030582	NM_030582	80781	collagen type XVIII alpha 1 chain	COL18A1	-0.0850963	0.56621	0	-0.111168	0.391088	0	-0.127812	0.206747	0	0.0534472	0.999232	0	0.0659361	0.912602	0	0.0976873	0.685621	0	0.0427153	0.958332	0	0.0166433	0.986784	0	-0.0260721	0.999957	0	-0.0442401	0.924055	0	-0.0317513	0.949796	0	0.0124888	0.999975	0
A_23_P500773	NM_003188	NM_003188	6885	mitogen-activated protein kinase kinase kinase 7	MAP3K7	0.0302927	0.855767	0	0.0130782	0.95285	0	0.0883124	0.393224	0	-0.159014	0.999232	0	0.153257	0.6482	0	-0.0344683	0.901343	0	-0.0580196	0.925645	0	-0.0752342	0.928903	0	-0.0172146	0.999957	0	-0.124546	0.73008	0	0.187725	0.623372	0	0.312271	0.999975	0
A_21_P0007934	ENST00000426509	ENST00000426509				-0.0241552	0.904817	0	-0.145723	0.273495	0	-0.119033	0.29811	0	0.0994724	0.999232	0	-0.0832176	0.892301	0	-0.33538	0.108388	0	0.0948778	0.872604	0	-0.0266897	0.980935	0	-0.121567	0.999957	0	0.434853	0.258877	0	0.252163	0.558526	0	-0.18269	0.999975	0
A_32_P148726	AK127789	AK127789				0.0818778	0.462925	0	-0.0613976	0.601922	0	0.0216875	0.847462	0	0.119251	0.999232	0	-0.0893086	0.794194	0	-0.0931311	0.612519	0	0.0601903	0.893957	0	-0.0830852	0.888161	0	-0.143275	0.999957	0	0.212382	0.429389	0	0.0038225	0.992988	0	-0.20856	0.999975	0
A_33_P3329444	NM_182574	NM_182574	284358	MEF2 activating motif and SAP domain containing transcriptional regulator	MAMSTR	0.114628	0.244714	0	0.041533	0.756529	0	-0.0180488	0.87596	0	0.0578377	0.999232	0	0.0318832	0.95346	0	0.0355949	0.869101	0	0.132677	0.719429	0	0.0595818	0.934091	0	-0.0730955	0.999957	0	0.0222428	0.953253	0	-0.00371171	0.993146	0	-0.0259545	0.999975	0
A_33_P3865368	NR_046173	NR_046173	254896	uncharacterized LOC254896	LOC254896	-0.119629	0.448985	0	-0.275614	0.0208516	-1	-0.178377	0.105092	0	-0.0289073	0.999232	0	0.107207	0.843538	0	0.0747947	0.797226	0	0.0587481	0.943511	0	-0.0972373	0.913474	0	-0.155985	0.999957	0	-0.103702	0.822712	0	0.032412	0.954895	0	0.136114	0.999975	0
A_23_P162386	NM_016293	NM_016293	51411	bridging integrator 2	BIN2	-0.120382	0.36708	0	-0.0411331	0.823144	0	0.0357267	0.789544	0	-0.0435892	0.999232	0	0.000151411	0.999604	0	0.00832059	0.980068	0	-0.156108	0.741177	0	-0.0768598	0.930777	0	0.0792484	0.999957	0	-0.0519098	0.90918	0	-0.00816918	0.987733	0	0.0437406	0.999975	0
A_19_P00316659	NR_003038	NR_003038	387066	small nucleolar RNA host gene 5	SNHG5	0.218431	0.104377	0	0.161711	0.239451	0	0.167767	0.140756	0	0.045989	0.999232	0	0.163263	0.716076	0	0.220117	0.363349	0	0.0506646	0.955105	0	-0.00605547	0.997736	0	-0.0567201	0.999957	0	-0.174128	0.681275	0	-0.056854	0.920783	0	0.117274	0.999975	0
A_19_P00315529	ENST00000561822	ENST00000561822				0.152169	0.256457	0	-0.0035803	0.989441	0	-0.0195514	0.900249	0	-0.0729822	0.999232	0	-0.0153838	0.987881	0	0.154535	0.512697	0	0.171721	0.737285	0	0.0159711	0.987989	0	-0.15575	0.999957	0	-0.227517	0.532742	0	-0.169919	0.697563	0	0.0575983	0.999975	0
A_32_P47701	NM_001402	NM_001402	1915	eukaryotic translation elongation factor 1 alpha 1	EEF1A1	0.0321369	0.917061	0	0.340998	0.0539918	0	0.259716	0.101832	0	-0.0426717	0.999232	0	0.368598	0.454821	0	0.434901	0.172775	0	-0.227579	0.765557	0	0.0812817	0.961505	0	0.308861	0.999957	0	-0.477573	0.385965	0	-0.0663032	0.934729	0	0.41127	0.999975	0
A_23_P210920	NM_000178	NM_000178	2937	glutathione synthetase	GSS	-0.0403585	0.763842	0	0.041958	0.766145	0	-0.0322891	0.764791	0	-0.0543339	0.999232	0	-0.135339	0.631849	0	0.146162	0.397568	0	-0.00806945	0.992558	0	0.0742471	0.908064	0	0.0823165	0.999957	0	-0.200496	0.466067	0	-0.281501	0.367859	0	-0.081005	0.999975	0
A_23_P357351	NM_173803	NM_173803	255027	MPV17 mitochondrial inner membrane protein like	MPV17L	0.0500316	0.770786	0	-0.0832898	0.581753	0	0.0340275	0.807731	0	0.127171	0.999232	0	-0.145663	0.716896	0	0.004146	0.991296	0	0.0160041	0.985617	0	-0.117317	0.880221	0	-0.133321	0.999957	0	0.123025	0.759196	0	-0.149809	0.731617	0	-0.272834	0.999975	0
A_23_P255805	NM_003416	NM_003416	7553	zinc finger protein 7	ZNF7	0.0153586	0.917061	0	0.0496969	0.688208	0	0.0891886	0.267081	0	-0.0588437	0.999232	0	0.036541	0.94473	0	0.0670205	0.726378	0	-0.07383	0.854017	0	-0.0394917	0.961505	0	0.0343383	0.999957	0	-0.125864	0.656339	0	-0.0304795	0.936873	0	0.0953848	0.999975	0
A_23_P202658	NM_000852	NM_000852	2950	glutathione S-transferase pi 1	GSTP1	0.00176385	0.994959	0	-0.0405159	0.840777	0	-0.0869385	0.471403	0	0.0610723	0.999232	0	-0.204004	0.554263	0	0.148876	0.537009	0	0.0887023	0.882686	0	0.0464226	0.966957	0	-0.0422797	0.999957	0	-0.0878037	0.844165	0	-0.35288	0.387724	0	-0.265076	0.999975	0
A_32_P16489	NM_145644	NM_145644	51318	mitochondrial ribosomal protein L35	MRPL35	0.0136048	0.93496	0	-0.0386583	0.80256	0	0.0331544	0.770258	0	0.0514515	0.999232	0	0.184674	0.481873	0	-0.0389559	0.868958	0	-0.0195496	0.980425	0	-0.0718127	0.91913	0	-0.0522631	0.999957	0	0.0904074	0.789536	0	0.22363	0.499466	0	0.133223	0.999975	0
A_23_P20022	NM_013332	NM_013332	29923	hypoxia inducible lipid droplet associated	HILPDA	0.0580692	0.666506	0	-0.0129814	0.947869	0	0.0669259	0.493885	0	0.0281813	0.999232	0	-0.00161569	0.998553	0	-0.00421781	0.989729	0	-0.00885678	0.992331	0	-0.0799073	0.904611	0	-0.0710505	0.999957	0	0.0323991	0.934958	0	0.00260211	0.995092	0	-0.029797	0.999975	0
A_32_P191860	NM_001025591	NM_001025591	284402	secretoglobin family 2B member 2	SCGB2B2	-0.0624279	0.812565	0	0.137079	0.529976	0	0.0576177	0.781288	0	0.158305	0.999232	0	0.0814527	0.938073	0	-0.0226073	0.963722	0	-0.120046	0.890729	0	0.079461	0.961399	0	0.199507	0.999957	0	0.180913	0.765645	0	0.10406	0.887144	0	-0.0768526	0.999975	0
A_23_P51660	NM_012222	NM_012222	4595	mutY DNA glycosylase	MUTYH	0.0509504	0.673597	0	0.0139706	0.934758	0	0.0112281	0.925444	0	-0.0791534	0.999232	0	-0.0602911	0.888872	0	0.180382	0.24163	0	0.0397223	0.94544	0	0.00274249	0.998928	0	-0.0369798	0.999957	0	-0.259535	0.321216	0	-0.240673	0.410457	0	0.0188623	0.999975	0
A_33_P3278826	ENST00000563518	ENST00000563518				-0.000940656	0.997334	0	0.177656	0.172775	0	-0.00490833	0.979437	0	0.191293	0.999232	0	0.189986	0.624257	0	0.0880128	0.756874	0	0.00396767	0.997501	0	0.182564	0.850492	0	0.178596	0.999957	0	0.10328	0.82277	0	0.101973	0.848017	0	-0.00130726	0.999975	0
A_23_P126908	NM_003820	NM_003820	8764	TNF receptor superfamily member 14	TNFRSF14	0.0554765	0.66015	0	0.132003	0.153076	0	-0.033643	0.749822	0	0.0573637	0.999232	0	0.0853645	0.813433	0	0.142152	0.407823	0	0.0891195	0.827653	0	0.165646	0.830643	0	0.0765261	0.999957	0	-0.0847887	0.790862	0	-0.0567878	0.88209	0	0.0280008	0.999975	0
A_33_P3293734	A_33_P3293734	A_33_P3293734				0.104693	0.29913	0	0.0648358	0.564623	0	-0.0268738	0.798559	0	-0.00389689	0.999232	0	-0.183762	0.433498	0	0.0883888	0.627741	0	0.131567	0.719429	0	0.0917096	0.876296	0	-0.0398576	0.999957	0	-0.0922857	0.760892	0	-0.27215	0.364049	0	-0.179865	0.999975	0
A_19_P00317984	NR_003038	NR_003038	387066	small nucleolar RNA host gene 5	SNHG5	0.100426	0.492573	0	0.03457	0.862225	0	0.0834235	0.466743	0	0.0537616	0.999232	0	-0.00601719	0.993518	0	0.327619	0.0920381	0	0.0170028	0.984377	0	-0.0488534	0.965328	0	-0.0658563	0.999957	0	-0.273858	0.429373	0	-0.333636	0.389891	0	-0.0597787	0.999975	0
A_33_P3342076	NM_015866	NM_015866	7799	PR/SET domain 2	PRDM2	-0.0610794	0.554422	0	-0.0155677	0.919226	0	-0.123759	0.0666591	0	0.0640098	0.999232	0	-0.0020994	0.99655	0	0.0205112	0.921755	0	0.0626797	0.865369	0	0.108191	0.850492	0	0.0455117	0.999957	0	0.0434986	0.887849	0	-0.0226106	0.948535	0	-0.0661092	0.999975	0
A_33_P3242693	NM_018484	NM_018484	55867	solute carrier family 22 member 11	SLC22A11	0.0552741	0.810335	0	0.0504428	0.842828	0	0.00792568	0.972264	0	0.0967788	0.999232	0	0.0934256	0.905894	0	-0.164309	0.597996	0	0.0473484	0.968258	0	0.0425172	0.974027	0	-0.00483123	0.999957	0	0.261088	0.584373	0	0.257735	0.637164	0	-0.00335315	0.999975	0
A_23_P144054	NM_006254	NM_006254	5580	protein kinase C delta	PRKCD	-0.275162	0.0130028	-1	-0.244836	0.0209855	-1	-0.231915	0.0151092	-1	-0.154249	0.999232	0	-0.248611	0.393795	0	-0.153368	0.484617	0	-0.0432465	0.957049	0	-0.0129207	0.989311	0	0.0303258	0.999957	0	-0.000881334	0.998691	0	-0.0952434	0.838579	0	-0.0943621	0.999975	0
A_23_P104942	NM_015959	NM_015959	51075	thioredoxin related transmembrane protein 2	TMX2	0.0562356	0.502576	0	0.132087	0.0346888	1	0.0264033	0.724774	0	0.0361094	0.999232	0	-0.0617724	0.813433	0	0.0558938	0.690267	0	0.0298323	0.94544	0	0.105684	0.836911	0	0.0758516	0.999957	0	-0.0197844	0.942052	0	-0.117666	0.61516	0	-0.0978818	0.999975	0
A_24_P322369	NM_004869	NM_004869	9525	vacuolar protein sorting 4 homolog B	VPS4B	-0.168292	0.381766	0	-0.0939739	0.676639	0	0.0556891	0.769063	0	-0.262309	0.999232	0	0.175463	0.769229	0	0.170377	0.605698	0	-0.223981	0.739227	0	-0.149663	0.888161	0	0.0743176	0.999957	0	-0.432686	0.367438	0	0.00508562	0.994395	0	0.437772	0.999975	0
A_32_P121303	NM_007172	NM_007172	10762	nucleoporin 50	NUP50	-0.120349	0.567211	0	-0.0707954	0.775958	0	-0.0558815	0.76717	0	-0.15669	0.999232	0	0.0299425	0.979947	0	0.160366	0.628539	0	-0.0644671	0.952355	0	-0.014914	0.991533	0	0.0495532	0.999957	0	-0.317056	0.515448	0	-0.130424	0.845288	0	0.186632	0.999975	0
A_21_P0010023	TCONS_00028345	TCONS_00028345				-0.0654494	0.776958	0	0.117385	0.553439	0	0.0138377	0.950727	0	-0.0721688	0.999232	0	0.186436	0.733876	0	-0.285651	0.316475	0	-0.0792871	0.9341	0	0.103547	0.935319	0	0.182834	0.999957	0	0.213482	0.674911	0	0.472088	0.371031	0	0.258605	0.999975	0
A_23_P57941	NM_005777	NM_005777	10180	RNA binding motif protein 6	RBM6	-0.028081	0.86282	0	-0.169773	0.0984612	0	-0.183696	0.0380118	-1	-0.0425755	0.999232	0	-0.188492	0.515079	0	0.0297081	0.913676	0	0.155615	0.719429	0	0.0139226	0.987989	0	-0.141692	0.999957	0	-0.0722836	0.851943	0	-0.2182	0.547694	0	-0.145916	0.999975	0
A_24_P880043	NM_032373	NM_032373	84333	polycomb group ring finger 5	PCGF5	0.07082	0.754869	0	0.170836	0.317929	0	0.15069	0.294545	0	-0.0862044	0.999232	0	0.205919	0.689335	0	0.0319161	0.93986	0	-0.0798698	0.933393	0	0.0201458	0.987989	0	0.100016	0.999957	0	-0.11812	0.834007	0	0.174003	0.772726	0	0.292124	0.999975	0
A_21_P0013410	ENST00000420313	ENST00000420313				-0.00716878	0.96789	0	0.0541622	0.706976	0	-0.0932799	0.31673	0	0.0929132	0.999232	0	0.0322857	0.957942	0	-0.210735	0.231751	0	0.0861111	0.849706	0	0.147442	0.850038	0	0.061331	0.999957	0	0.303648	0.313009	0	0.243021	0.477879	0	-0.0606275	0.999975	0
A_23_P258194	NM_001018060	NM_001018060	150209	apoptosis inducing factor, mitochondria associated 3	AIFM3	-0.048728	0.682676	0	-0.00411013	0.983348	0	-0.0388124	0.684987	0	0.0407143	0.999232	0	-0.10901	0.707081	0	0.080833	0.649791	0	-0.00991568	0.988218	0	0.0347022	0.966283	0	0.0446179	0.999957	0	-0.0401187	0.908012	0	-0.189843	0.518258	0	-0.149724	0.999975	0
A_33_P3263027	BE266556	BE266556				0.216327	0.485648	0	0.0538287	0.907119	0	0.0629908	0.837081	0	-0.118578	0.999232	0	0.0927001	0.949964	0	-0.154851	0.781423	0	0.153336	0.907309	0	-0.00916208	0.998599	0	-0.162498	0.999957	0	0.0362722	0.972642	0	0.247551	0.801927	0	0.211278	0.999975	0
A_23_P256021	NM_031206	NM_031206	81887	LAS1 like, ribosome biogenesis factor	LAS1L	-0.0523437	0.665949	0	-0.105693	0.255861	0	-0.118275	0.118854	0	-0.160948	0.999232	0	-0.221175	0.290118	0	-0.00297543	0.991798	0	0.0659313	0.877061	0	0.0125822	0.987101	0	-0.0533492	0.999957	0	-0.157973	0.555856	0	-0.218199	0.461907	0	-0.0602264	0.999975	0
A_21_P0002261	TCONS_00003800	TCONS_00003800				-0.0254	0.89901	0	-0.251875	0.0308141	-1	-0.0746294	0.560306	0	0.0664813	0.999232	0	-0.188437	0.610514	0	0.0686787	0.808499	0	0.0492295	0.952589	0	-0.177246	0.850492	0	-0.226475	0.999957	0	-0.00219736	0.997447	0	-0.257116	0.547914	0	-0.254919	0.999975	0
A_19_P00802390	TCONS_00015178	TCONS_00015178				0.0130623	0.968317	0	0.031319	0.930499	0	0.220714	0.176328	0	-0.0215746	0.999232	0	-0.00077033	0.999589	0	-0.0348996	0.945056	0	-0.207651	0.787891	0	-0.189395	0.876296	0	0.0182567	0.999957	0	0.013325	0.987315	0	0.0341292	0.969245	0	0.0208043	0.999975	0
A_24_P190168	NM_014573	NM_014573	27346	transmembrane protein 97	TMEM97	0.0250834	0.860962	0	-0.0114423	0.951055	0	0.0633826	0.489786	0	-0.0700234	0.999232	0	-0.00203291	0.997341	0	0.142516	0.408251	0	-0.0382993	0.950683	0	-0.0748249	0.905776	0	-0.0365257	0.999957	0	-0.212539	0.436297	0	-0.144549	0.659591	0	0.0679905	0.999975	0
A_24_P233917	NM_014774	NM_014774	9813	EF-hand calcium binding domain 14	EFCAB14	0.0217493	0.87159	0	-0.0365584	0.784807	0	0.0517834	0.560306	0	-0.119607	0.999232	0	-0.108347	0.71047	0	0.0516292	0.790098	0	-0.030034	0.961896	0	-0.0883417	0.876296	0	-0.0583077	0.999957	0	-0.171236	0.507123	0	-0.159976	0.59382	0	0.0112604	0.999975	0
A_33_P3271111	NM_004148	NM_004148	4814	ninjurin 1	NINJ1	-0.0716452	0.645178	0	-0.190597	0.0861251	0	-0.120606	0.241785	0	-0.000443907	0.999672	0	-0.16114	0.652127	0	0.054287	0.84036	0	0.0489606	0.94799	0	-0.0699913	0.938812	0	-0.118952	0.999957	0	-0.0547309	0.904709	0	-0.215427	0.589304	0	-0.160696	0.999975	0
A_33_P3390853	NR_015367	NR_015367				0.115745	0.210475	0	0.102319	0.255727	0	0.0724374	0.3673	0	0.0141878	0.999232	0	-0.103302	0.721602	0	0.0954374	0.573079	0	0.0433072	0.933636	0	0.0298817	0.968684	0	-0.0134254	0.999957	0	-0.0812496	0.782947	0	-0.19874	0.493579	0	-0.11749	0.999975	0
A_32_P70724	NM_006618	NM_006618	10765	lysine demethylase 5B	KDM5B	-0.0779843	0.455729	0	-0.184362	0.0190854	-1	-0.091744	0.225733	0	-0.101831	0.999232	0	-0.0767552	0.822397	0	-0.0184502	0.935922	0	0.0137597	0.982652	0	-0.0926181	0.874631	0	-0.106378	0.999957	0	-0.0833804	0.773713	0	-0.058305	0.868027	0	0.0250754	0.999975	0
A_33_P3358099	NM_181449	NM_181449	342510	CD300e molecule	CD300E	-0.0637514	0.736032	0	0.0336338	0.886373	0	-0.118001	0.334848	0	-0.0981287	0.999232	0	-0.29768	0.366634	0	0.0224939	0.951212	0	0.0542496	0.950683	0	0.151635	0.872944	0	0.0973853	0.999957	0	-0.120623	0.792396	0	-0.320174	0.472753	0	-0.199551	0.999975	0
A_23_P358009	NM_015291	NM_015291	23341	DnaJ heat shock protein family (Hsp40) member C16	DNAJC16	-0.0277592	0.845548	0	-0.0264519	0.870801	0	0.00901269	0.945585	0	0.0206119	0.999232	0	0.00283471	0.995933	0	0.0352395	0.878613	0	-0.0367719	0.952771	0	-0.0354646	0.966957	0	0.00130726	0.999957	0	-0.0146276	0.971072	0	-0.0324048	0.936608	0	-0.0177772	0.999975	0
A_23_P254353	NM_006647	NM_006647	10811	NADPH oxidase activator 1	NOXA1	0.125771	0.376116	0	0.0563552	0.7555	0	-0.00702293	0.969416	0	-0.0629527	0.999232	0	-0.0352746	0.964542	0	0.18076	0.426648	0	0.132794	0.792761	0	0.0633781	0.950443	0	-0.0694157	0.999957	0	-0.243713	0.499053	0	-0.216035	0.608448	0	0.0276782	0.999975	0
A_24_P401100	A_24_P401100	A_24_P401100				0.197161	0.390494	0	0.277593	0.152686	0	0.120744	0.540724	0	-0.0634774	0.999232	0	0.186346	0.801079	0	0.682873	0.0350071	1	0.0764168	0.95264	0	0.156848	0.905724	0	0.0804317	0.999957	0	-0.74635	0.226282	0	-0.496527	0.443359	0	0.249823	0.999975	0
A_23_P210608	NM_006526	NM_006526	7764	zinc finger protein 217	ZNF217	-0.177492	0.102143	0	-0.139506	0.201422	0	-0.00618818	0.969416	0	-0.107962	0.999232	0	0.143997	0.670315	0	0.0636779	0.790098	0	-0.171304	0.708281	0	-0.133318	0.86316	0	0.0379859	0.999957	0	-0.17164	0.603768	0	0.0803188	0.85495	0	0.251959	0.999975	0
A_23_P15798	NM_031854	NM_031854	83755	keratin associated protein 4-12	KRTAP4-12	0.119693	0.594464	0	0.0859504	0.727043	0	0.00745754	0.976323	0	-0.180548	0.999232	0	0.085581	0.93091	0	-0.189926	0.574755	0	0.112236	0.897164	0	0.0784928	0.959709	0	-0.0337427	0.999957	0	0.009378	0.99041	0	0.275507	0.645834	0	0.266129	0.999975	0
A_23_P354217	NM_153266	NM_153266	256472	transmembrane protein 151A	TMEM151A	0.0516349	0.758997	0	0.0150629	0.948596	0	-0.0951159	0.389763	0	-0.0525932	0.999232	0	-0.105345	0.822397	0	-0.197729	0.351897	0	0.146751	0.758129	0	0.110179	0.886591	0	-0.0365719	0.999957	0	0.145135	0.702368	0	0.0923837	0.847806	0	-0.0527516	0.999975	0
A_23_P206532	NM_001031835	NM_001031835	5257	phosphorylase kinase regulatory subunit beta	PHKB	-0.173867	0.0431756	-1	-0.164724	0.0465862	-1	-0.0198376	0.856818	0	-0.15198	0.999232	0	-0.149935	0.54097	0	-0.0242235	0.914881	0	-0.15403	0.690317	0	-0.144886	0.835508	0	0.00914338	0.999957	0	-0.127756	0.646005	0	-0.125712	0.689633	0	0.00204421	0.999975	0
A_19_P00322930	XR_241662	XR_241662				0.145535	0.156668	0	0.030316	0.853291	0	0.0381583	0.729633	0	-0.0201003	0.999232	0	0.0411706	0.943877	0	0.00586145	0.984165	0	0.107376	0.792266	0	-0.0078423	0.993071	0	-0.115219	0.999957	0	-0.0259617	0.948855	0	0.0353091	0.933992	0	0.0612709	0.999975	0
A_21_P0011120	NM_006437	NM_006437	143	poly(ADP-ribose) polymerase family member 4	PARP4	-0.384926	0.00202339	-1	-0.265483	0.0207446	-1	-0.151979	0.157712	0	-0.186713	0.999232	0	-0.181761	0.626713	0	-0.0684497	0.808022	0	-0.232947	0.685006	0	-0.113504	0.888161	0	0.119443	0.999957	0	-0.118263	0.780658	0	-0.113311	0.821489	0	0.00495209	0.999975	0
A_23_P112061	NM_152419	NM_152419	138050	heparan-alpha-glucosaminide N-acetyltransferase	HGSNAT	-0.170802	0.036786	-1	-0.306068	4.17964e-05	-1	-0.170423	0.0144651	-1	-0.0960838	0.999232	0	-0.215824	0.265808	0	-0.22866	0.100873	0	-0.000379407	0.999338	0	-0.135645	0.835508	0	-0.135266	0.999957	0	0.132576	0.61043	0	0.0128351	0.974244	0	-0.119741	0.999975	0
A_33_P3235330	NM_021090	NM_021090	8897	myotubularin related protein 3	MTMR3	-0.139497	0.199708	0	-0.15513	0.11917	0	-0.261675	0.00200611	-1	0.0478329	0.999232	0	-0.119667	0.730875	0	-0.1646	0.377023	0	0.122178	0.769585	0	0.106545	0.87537	0	-0.0156329	0.999957	0	0.212432	0.480908	0	0.0449325	0.918454	0	-0.1675	0.999975	0
A_33_P3351529	A_33_P3351529	A_33_P3351529				0.173685	0.673747	0	0.272255	0.435071	0	0.154397	0.631395	0	-0.129134	0.999232	0	0.172417	0.912602	0	0.573331	0.281258	0	0.019288	0.994942	0	0.117858	0.966283	0	0.0985696	0.999957	0	-0.702465	0.430849	0	-0.400914	0.715901	0	0.301551	0.999975	0
A_23_P91350	NM_019593	NM_019593	56261	glycerophosphocholine phosphodiesterase 1	GPCPD1	-0.00528396	0.974607	0	-0.203838	0.0191654	-1	-0.0797777	0.365795	0	-0.132146	0.999232	0	-0.0528511	0.915773	0	-0.0980333	0.606014	0	0.0744937	0.861949	0	-0.12406	0.851157	0	-0.198554	0.999957	0	-0.0341131	0.928497	0	0.0451821	0.909661	0	0.0792952	0.999975	0
A_23_P127721	NM_002559	NM_002559	5024	purinergic receptor P2X 3	P2RX3	0.0564674	0.883056	0	0.0749816	0.854292	0	0.045275	0.88775	0	-0.0400215	0.999232	0	-0.0920806	0.949521	0	-0.388598	0.389831	0	0.0111924	0.996161	0	0.0297067	0.987992	0	0.0185142	0.999957	0	0.348577	0.653204	0	0.296518	0.744964	0	-0.0520591	0.999975	0
A_23_P111481	NM_015908	NM_015908	51593	serrate, RNA effector molecule	SRRT	-0.0737236	0.540439	0	-0.126728	0.184852	0	-0.153974	0.0515028	0	-0.105389	0.999232	0	-0.197228	0.421443	0	0.0106989	0.967714	0	0.0802503	0.849342	0	0.0272458	0.972293	0	-0.0530045	0.999957	0	-0.116088	0.70595	0	-0.207926	0.515603	0	-0.0918382	0.999975	0
A_23_P139648	NM_000415	NM_000415	3375	islet amyloid polypeptide	IAPP	0.090073	0.59008	0	0.0961855	0.541651	0	-0.0561678	0.6918	0	0.0235341	0.999232	0	-0.180363	0.644749	0	0.119371	0.64844	0	0.146241	0.78023	0	0.152353	0.867538	0	0.0061125	0.999957	0	-0.0958367	0.833168	0	-0.299734	0.486726	0	-0.203897	0.999975	0
A_23_P103149	NM_001098	NM_001098	50	aconitase 2	ACO2	-0.186711	0.021392	-1	-0.167242	0.03316	-1	-0.133767	0.0574777	0	-0.133415	0.999232	0	-0.257077	0.16166	0	-0.195852	0.172221	0	-0.0529444	0.904125	0	-0.0334749	0.966283	0	0.0194695	0.999957	0	0.0624361	0.835162	0	-0.0612258	0.858583	0	-0.123662	0.999975	0
A_33_P3351249	NM_001100812	NM_001100812	58191	C-X-C motif chemokine ligand 16	CXCL16	-0.0480237	0.767835	0	-0.183345	0.0928948	0	-0.18515	0.0500216	0	0.18737	0.999232	0	-0.0301097	0.969461	0	-0.180849	0.384079	0	0.137127	0.767582	0	0.00180532	0.999324	0	-0.135321	0.999957	0	0.368219	0.275854	0	0.15074	0.713511	0	-0.217479	0.999975	0
A_21_P0008352	ENST00000553944	ENST00000553944				0.0105284	0.947932	0	-0.0568413	0.661011	0	0.107952	0.197748	0	0.0324918	0.999232	0	0.0664492	0.884085	0	-0.126361	0.48801	0	-0.0974235	0.810772	0	-0.164793	0.835508	0	-0.0673697	0.999957	0	0.158853	0.587926	0	0.19281	0.553886	0	0.0339573	0.999975	0
A_33_P3339011	ENST00000546413	ENST00000546413				0.0299972	0.861621	0	-0.122712	0.306758	0	-0.0606535	0.604647	0	-0.0305382	0.999232	0	-0.110238	0.7941	0	-0.0928594	0.693477	0	0.0906507	0.857821	0	-0.0620587	0.946046	0	-0.152709	0.999957	0	0.0623212	0.885489	0	-0.0173789	0.973937	0	-0.0797001	0.999975	0
A_21_P0003200	TCONS_00006730	TCONS_00006730				-0.0599722	0.847715	0	0.040452	0.918544	0	-0.0276408	0.920491	0	0.0296827	0.999232	0	-0.0273169	0.98743	0	-0.183743	0.668614	0	-0.0323313	0.982652	0	0.0680928	0.968684	0	0.100424	0.999957	0	0.213426	0.760545	0	0.156426	0.854295	0	-0.0569996	0.999975	0
A_24_P79054	NM_000660	NM_000660	7040	transforming growth factor beta 1	TGFB1	-0.249132	0.0986005	0	0.00491707	0.988316	0	-0.124841	0.371126	0	-0.0650419	0.999232	0	-0.17766	0.726052	0	0.0222153	0.95687	0	-0.124291	0.852714	0	0.129758	0.894286	0	0.254049	0.999957	0	-0.0872572	0.877366	0	-0.199875	0.712228	0	-0.112618	0.999975	0
A_23_P107735	NM_001783	NM_001783	973	CD79a molecule	CD79A	-0.0213093	0.96494	0	0.0144135	0.981574	0	0.207197	0.442311	0	0.0712579	0.999232	0	0.0311256	0.989756	0	-0.569216	0.24163	0	-0.228506	0.855316	0	-0.192784	0.928903	0	0.0357228	0.999957	0	0.640474	0.435402	0	0.600342	0.524561	0	-0.0401323	0.999975	0
A_33_P3212490	NM_001195573	NM_001195573	23405	dicer 1, ribonuclease III	DICER1	-0.101162	0.567511	0	-0.0433865	0.848083	0	0.0718544	0.621	0	-0.23207	0.999232	0	0.167743	0.716896	0	-0.00388367	0.993301	0	-0.173016	0.756551	0	-0.115241	0.899788	0	0.0577751	0.999957	0	-0.228186	0.588042	0	0.171626	0.73352	0	0.399812	0.999975	0
A_23_P255523	NM_017621	NM_017621	54784	alkB homolog 4, lysine demethylase	ALKBH4	-0.0565905	0.587085	0	-0.0417319	0.713153	0	-0.0711878	0.33418	0	-0.0114505	0.999232	0	0.0134976	0.982269	0	0.046787	0.793418	0	0.0145973	0.981617	0	0.0294559	0.966988	0	0.0148586	0.999957	0	-0.0582374	0.83882	0	-0.0332893	0.92253	0	0.0249481	0.999975	0
A_24_P357100	NM_014310	NM_014310	23551	RASD family member 2	RASD2	0.0884973	0.569701	0	0.0743056	0.646368	0	0.0625602	0.625336	0	0.0357953	0.999232	0	-0.0529415	0.940353	0	-0.0236323	0.941475	0	0.0259371	0.979737	0	0.0117453	0.990876	0	-0.0141917	0.999957	0	0.0594276	0.900668	0	-0.0293092	0.95668	0	-0.0887368	0.999975	0
A_23_P3911	NM_020405	NM_020405	57125	plexin domain containing 1	PLXDC1	0.0643713	0.706674	0	-0.0333723	0.875906	0	0.0286306	0.850357	0	0.0323867	0.999232	0	-0.0145963	0.989021	0	-0.0674021	0.807535	0	0.0357407	0.970667	0	-0.0620029	0.952131	0	-0.0977436	0.999957	0	0.0997888	0.819241	0	0.0528058	0.920406	0	-0.046983	0.999975	0
A_23_P307430	NM_152344	NM_152344	124801	LSM12 homolog	LSM12	0.145824	0.19753	0	0.146033	0.169639	0	0.0907259	0.355531	0	0.169592	0.999232	0	0.0324806	0.960031	0	0.163821	0.401318	0	0.0550983	0.927913	0	0.0553072	0.950331	0	0.00020887	0.999957	0	0.00577145	0.99041	0	-0.13134	0.735436	0	-0.137112	0.999975	0
A_24_P349821	NM_004294	NM_004294	9617	mitochondrial translation release factor 1	MTRF1	-0.0360097	0.770377	0	-0.0225582	0.881049	0	0.0919001	0.225199	0	0.0315381	0.999232	0	0.0571511	0.891281	0	0.0241253	0.912848	0	-0.12791	0.71662	0	-0.114458	0.850492	0	0.0134515	0.999957	0	0.00741277	0.9843	0	0.0330258	0.927939	0	0.025613	0.999975	0
A_33_P3321657	NM_005529	NM_005529	3339	heparan sulfate proteoglycan 2	HSPG2	0.0915798	0.641978	0	-0.00417338	0.989574	0	-0.0793178	0.604218	0	0.0575206	0.999232	0	0.0379282	0.970345	0	-0.223327	0.410493	0	0.170898	0.773096	0	0.0751445	0.951256	0	-0.0957531	0.999957	0	0.280848	0.521239	0	0.261255	0.606686	0	-0.0195924	0.999975	0
A_23_P428382	NM_203437	NM_203437	54812	aftiphilin	AFTPH	0.0323376	0.784722	0	-0.0564542	0.585054	0	0.00630284	0.956224	0	-0.0968738	0.999232	0	-0.070846	0.831198	0	0.127468	0.394475	0	0.0260348	0.965151	0	-0.062757	0.910726	0	-0.0887918	0.999957	0	-0.224342	0.348977	0	-0.198314	0.465177	0	0.0260278	0.999975	0
A_21_P0013979	AK129721	AK129721				0.0451137	0.72884	0	-0.0703728	0.530342	0	-0.0646877	0.471355	0	0.0912587	0.999232	0	-0.0186985	0.978972	0	-0.230555	0.133073	0	0.109801	0.769724	0	-0.00568504	0.995698	0	-0.115486	0.999957	0	0.321814	0.255711	0	0.211857	0.493241	0	-0.109957	0.999975	0
A_23_P12405	NM_031475	NM_031475	83715	espin	ESPN	-0.114729	0.52111	0	-0.00252762	0.994611	0	-0.0493377	0.76212	0	0.0485062	0.999232	0	0.000337433	0.999604	0	-0.186215	0.491819	0	-0.0653909	0.940178	0	0.0468101	0.968684	0	0.112201	0.999957	0	0.234722	0.589265	0	0.186553	0.718114	0	-0.0481687	0.999975	0
A_24_P400997	NM_015295	NM_015295	23347	structural maintenance of chromosomes flexible hinge domain containing 1	SMCHD1	-0.139366	0.427605	0	0.0279363	0.920383	0	0.0155272	0.939564	0	-0.060056	0.999232	0	0.0664329	0.938073	0	0.274877	0.285395	0	-0.154894	0.796466	0	0.0124092	0.992652	0	0.167303	0.999957	0	-0.334933	0.43457	0	-0.208444	0.689633	0	0.126489	0.999975	0
A_23_P121885	NM_031916	NM_031916	83853	rhophilin associated tail protein 1 like	ROPN1L	-0.00526151	0.981809	0	-0.222475	0.0646396	0	-0.120836	0.293566	0	0.0454414	0.999232	0	-0.0751979	0.90752	0	0.00441659	0.991296	0	0.115574	0.840529	0	-0.101639	0.906355	0	-0.217214	0.999957	0	0.0410248	0.935376	0	-0.0796145	0.878618	0	-0.120639	0.999975	0
A_23_P431939	NM_001531	NM_001531	3140	major histocompatibility complex, class I-related	MR1	-0.0381983	0.786038	0	0.0922206	0.40014	0	0.0379013	0.727186	0	0.0296236	0.999232	0	-0.119611	0.713394	0	0.178663	0.297365	0	-0.0760995	0.862664	0	0.0543193	0.946046	0	0.130419	0.999957	0	-0.149039	0.621508	0	-0.298274	0.358117	0	-0.149235	0.999975	0
A_23_P122906	NM_015570	NM_015570	26053	AUTS2, activator of transcription and developmental regulator	AUTS2	-0.0797527	0.637854	0	-0.328676	0.00355265	-1	-0.140477	0.204828	0	-0.112184	0.999232	0	-0.138884	0.758397	0	-0.323555	0.123661	0	0.0607248	0.936028	0	-0.188199	0.84917	0	-0.248924	0.999957	0	0.211371	0.584431	0	0.184671	0.681641	0	-0.0266997	0.999975	0
A_23_P24157	NM_032709	NM_032709	84795	pyridine nucleotide-disulphide oxidoreductase domain 2	PYROXD2	0.0138356	0.940816	0	-0.00630124	0.979829	0	0.0558141	0.632225	0	-0.0902161	0.999232	0	-0.0500173	0.938073	0	0.243147	0.195928	0	-0.0419785	0.95474	0	-0.0621153	0.944629	0	-0.0201369	0.999957	0	-0.333363	0.306505	0	-0.293165	0.41783	0	0.0401988	0.999975	0
A_23_P216568	NM_017832	NM_017832	54942	family with sequence similarity 206 member A	FAM206A	0.0246947	0.885821	0	-0.0321792	0.863454	0	0.0588674	0.609756	0	0.0905673	0.999232	0	0.0168234	0.984199	0	0.02521	0.931539	0	-0.0341726	0.967457	0	-0.0910466	0.90086	0	-0.0568739	0.999957	0	0.0653574	0.874404	0	-0.00838655	0.986561	0	-0.0737439	0.999975	0
A_21_P0013977	ENST00000493650	ENST00000493650				0.0912663	0.562698	0	-0.0555843	0.763218	0	-0.0590859	0.654673	0	-0.0254352	0.999232	0	-0.076461	0.901052	0	-0.0100266	0.976687	0	0.150352	0.764486	0	0.00350161	0.999185	0	-0.146851	0.999957	0	-0.0154086	0.976531	0	-0.0664343	0.897674	0	-0.0510258	0.999975	0
A_23_P109677	A_23_P109677	A_23_P109677				0.00330763	0.992336	0	0.152657	0.403936	0	-0.0524926	0.779233	0	0.227849	0.999232	0	0.0344184	0.97628	0	0.0988141	0.784206	0	0.0558002	0.961896	0	0.20515	0.858639	0	0.14935	0.999957	0	0.129035	0.822522	0	-0.0643958	0.925438	0	-0.193431	0.999975	0
A_24_P76358	A_24_P76358	A_24_P76358				0.168793	0.562459	0	0.32109	0.155279	0	-0.00633373	0.986336	0	0.222285	0.999232	0	0.233922	0.780973	0	0.212893	0.64553	0	0.175127	0.867696	0	0.327423	0.850059	0	0.152297	0.999957	0	0.00939147	0.992793	0	0.0210294	0.984713	0	0.0116379	0.999975	0
A_33_P3327245	NM_031915	NM_031915	83852	SET domain bifurcated 2	SETDB2	-0.00660975	0.967399	0	-0.0244543	0.880376	0	0.0617795	0.499276	0	-0.0740723	0.999232	0	-0.0099407	0.989839	0	0.215523	0.170456	0	-0.0683893	0.877061	0	-0.0862338	0.886591	0	-0.0178445	0.999957	0	-0.289595	0.291686	0	-0.225464	0.465177	0	0.0641316	0.999975	0
A_33_P3297611	AI924184	AI924184				0.0539453	0.842803	0	0.0822262	0.760774	0	0.00527665	0.985482	0	0.0377312	0.999232	0	0.117433	0.895565	0	-0.0894779	0.830268	0	0.0486687	0.973414	0	0.0769495	0.962591	0	0.0282809	0.999957	0	0.127209	0.844421	0	0.20691	0.760722	0	0.0797013	0.999975	0
A_33_P3226085	ENST00000390315	ENST00000390315				-0.0752628	0.760725	0	-0.0104181	0.978925	0	-0.0728485	0.703412	0	-0.226023	0.999232	0	-0.255464	0.619248	0	0.032736	0.94355	0	-0.00241427	0.997941	0	0.0624304	0.968008	0	0.0648447	0.999957	0	-0.258759	0.631377	0	-0.2882	0.632382	0	-0.0294409	0.999975	0
A_23_P382043	NM_152729	NM_152729	221294	5'-nucleotidase domain containing 1	NT5DC1	0.0416037	0.808365	0	-0.0193591	0.930801	0	0.132214	0.195493	0	-0.117298	0.999232	0	0.0967418	0.842401	0	0.1005	0.680596	0	-0.0906104	0.866094	0	-0.151573	0.854322	0	-0.0609628	0.999957	0	-0.217799	0.532742	0	-0.00375859	0.994334	0	0.21404	0.999975	0
A_33_P3229083	NM_080593	NM_080593	85236	histone cluster 1 H2B family member k	HIST1H2BK	-0.105907	0.411692	0	-0.00988292	0.965297	0	0.0285347	0.827727	0	0.00327756	0.999232	0	-0.13009	0.721602	0	-0.0176541	0.953085	0	-0.134442	0.760448	0	-0.0384176	0.968415	0	0.0960242	0.999957	0	0.0209317	0.965682	0	-0.112436	0.789723	0	-0.133367	0.999975	0
A_23_P115919	NM_001037537	NM_001037537	5264	phytanoyl-CoA 2-hydroxylase	PHYH	0.0434219	0.586784	0	0.00784145	0.949061	0	0.0393882	0.521293	0	0.0344551	0.999232	0	0.00490657	0.991567	0	0.0554791	0.660395	0	0.0040337	0.994942	0	-0.0315467	0.951256	0	-0.0355804	0.999957	0	-0.0210241	0.932334	0	-0.0505726	0.83903	0	-0.0295485	0.999975	0
A_23_P211522	NM_145738	NM_145738	9145	synaptogyrin 1	SYNGR1	0.0219087	0.904817	0	0.0216385	0.92182	0	0.0106024	0.947179	0	0.158896	0.999232	0	0.0182531	0.982866	0	0.137005	0.541138	0	0.0113063	0.989672	0	0.0110361	0.990876	0	-0.000270204	0.999957	0	0.0218907	0.96601	0	-0.118752	0.789481	0	-0.140643	0.999975	0
A_33_P3233953	A_33_P3233953	A_33_P3233953				-0.111848	0.563417	0	0.111681	0.548027	0	-0.105135	0.475784	0	0.161274	0.999232	0	0.268886	0.512151	0	-0.0676123	0.847882	0	-0.00671304	0.996161	0	0.216816	0.850149	0	0.223529	0.999957	0	0.228886	0.626949	0	0.336498	0.50689	0	0.107612	0.999975	0
A_23_P35045	NM_001025598	NM_001025598	257106	Rho GTPase activating protein 30	ARHGAP30	-0.213861	0.0554	0	-0.144147	0.21394	0	-0.123628	0.216198	0	-0.141613	0.999232	0	-0.0821464	0.87601	0	0.104552	0.65327	0	-0.0902328	0.859932	0	-0.020519	0.982814	0	0.0697138	0.999957	0	-0.246165	0.460378	0	-0.186698	0.638304	0	0.0594669	0.999975	0
A_23_P250413	NM_022141	NM_022141	64098	parvin gamma	PARVG	-0.172472	0.0901398	0	-0.0545345	0.701893	0	-0.0560479	0.59372	0	-0.0339565	0.999232	0	-0.117251	0.738176	0	0.0268866	0.91758	0	-0.116424	0.777378	0	0.0015134	0.999342	0	0.117938	0.999957	0	-0.0608431	0.872013	0	-0.144138	0.690147	0	-0.0832947	0.999975	0
A_21_P0009364	TCONS_00025765	TCONS_00025765				0.0398246	0.776997	0	-0.0877931	0.43328	0	-0.159088	0.0501356	0	-0.0249512	0.999232	0	-0.0594606	0.904278	0	0.214349	0.198027	0	0.198913	0.685006	0	0.071295	0.917218	0	-0.127618	0.999957	0	-0.2393	0.403686	0	-0.273809	0.395603	0	-0.0345095	0.999975	0
A_23_P207400	NM_007300	NM_007300	672	BRCA1, DNA repair associated	BRCA1	0.0452554	0.598739	0	-0.0188502	0.867011	0	-0.0668534	0.255984	0	-0.0304269	0.999232	0	-0.0871189	0.679559	0	-0.0647425	0.626491	0	0.112109	0.698173	0	0.0480032	0.918584	0	-0.0641057	0.999957	0	0.0343155	0.892259	0	-0.0223764	0.936873	0	-0.056692	0.999975	0
A_23_P396062	NM_021168	NM_021168	57799	RAB40C, member RAS oncogene family	RAB40C	-0.134306	0.260217	0	-0.0842591	0.523142	0	0.0243389	0.857174	0	0.0205079	0.999232	0	-0.131363	0.717543	0	0.0195261	0.947109	0	-0.158645	0.719429	0	-0.108598	0.876296	0	0.0500472	0.999957	0	0.000981779	0.998691	0	-0.150889	0.697563	0	-0.151871	0.999975	0
A_23_P201047	NM_007112	NM_007112	7059	thrombospondin 3	THBS3	-0.069307	0.511751	0	-0.118554	0.157863	0	-0.0902256	0.225924	0	0.0401936	0.999232	0	0.0132656	0.983534	0	0.056674	0.758972	0	0.0209186	0.97629	0	-0.0283283	0.968684	0	-0.0492469	0.999957	0	-0.0164804	0.965099	0	-0.0434084	0.901791	0	-0.026928	0.999975	0
A_23_P106505	NM_014793	NM_014793	9836	leucine carboxyl methyltransferase 2	LCMT2	-0.0154163	0.918285	0	-0.0297375	0.841674	0	0.0247699	0.820817	0	-0.0684252	0.999232	0	-0.0027532	0.995869	0	0.108844	0.541306	0	-0.0401863	0.946208	0	-0.0545074	0.93993	0	-0.0143211	0.999957	0	-0.177269	0.512675	0	-0.111597	0.739758	0	0.065672	0.999975	0
A_23_P2423	NM_018048	NM_018048	55110	mago homolog B, exon junction complex core component	MAGOHB	0.101487	0.289975	0	0.064241	0.543891	0	0.0943796	0.210809	0	-0.00495553	0.999232	0	-0.0298578	0.953853	0	0.112298	0.493313	0	0.0071074	0.992961	0	-0.0301386	0.968415	0	-0.037246	0.999957	0	-0.117254	0.667661	0	-0.142156	0.636747	0	-0.0249022	0.999975	0
A_19_P00802936	NM_018462	NM_018462	55845	BRICK1, SCAR/WAVE actin nucleating complex subunit	BRK1	0.127681	0.0622715	0	0.0796017	0.2763	0	0.127937	0.025998	1	-0.0335946	0.999232	0	-0.0401971	0.910492	0	0.175999	0.12726	0	-0.000255247	0.999338	0	-0.0483349	0.927136	0	-0.0480796	0.999957	0	-0.209594	0.307527	0	-0.216196	0.350538	0	-0.00660247	0.999975	0
A_23_P502882	NM_005093	NM_005093	9139	CBFA2/RUNX1 translocation partner 2	CBFA2T2	-0.0910246	0.352443	0	-0.0269012	0.847959	0	-0.0860286	0.260159	0	-0.0568306	0.999232	0	0.0451416	0.92255	0	-0.0919504	0.585414	0	-0.00499599	0.995488	0	0.0591274	0.927307	0	0.0641234	0.999957	0	0.0351198	0.918165	0	0.137092	0.645078	0	0.101972	0.999975	0
A_23_P110243	NM_020961	NM_020961	57721	methyltransferase like 14	METTL14	0.0890733	0.524436	0	-0.0343766	0.852044	0	0.0647808	0.56944	0	-0.0463087	0.999232	0	0.0207701	0.979788	0	0.100058	0.661451	0	0.0242925	0.979596	0	-0.0991574	0.890188	0	-0.12345	0.999957	0	-0.146367	0.680167	0	-0.0792883	0.860665	0	0.0670788	0.999975	0
A_33_P3709317	NR_002964	NR_002964	677811	small nucleolar RNA, H/ACA box 28	SNORA28	0.222688	0.288389	0	-0.0194036	0.960487	0	-0.0811899	0.696968	0	0.0555826	0.999232	0	-0.0436747	0.974101	0	-0.125798	0.760291	0	0.303878	0.708281	0	0.0617864	0.968684	0	-0.242091	0.999957	0	0.18138	0.775735	0	0.0821229	0.919267	0	-0.0992574	0.999975	0
A_23_P106798	NM_003031	NM_003031	6477	siah E3 ubiquitin protein ligase 1	SIAH1	-0.0489036	0.642258	0	-0.0795164	0.357613	0	0.00623926	0.954709	0	-0.000310616	0.999672	0	0.0330388	0.943877	0	-0.0232749	0.907379	0	-0.0551429	0.88368	0	-0.0857556	0.87402	0	-0.0306128	0.999957	0	0.0229643	0.94252	0	0.0563137	0.859937	0	0.0333494	0.999975	0
A_23_P109768	NM_014245	NM_014245	9616	ring finger protein 7	RNF7	0.195399	0.0251285	1	0.184955	0.027571	1	0.16037	0.0337087	1	0.0462543	0.999232	0	0.107061	0.727596	0	0.36098	0.0171404	1	0.0350292	0.953349	0	0.0245851	0.974027	0	-0.0104442	0.999957	0	-0.314726	0.258725	0	-0.253919	0.397329	0	0.060807	0.999975	0
A_32_P184279	NM_005436	NM_005436	8030	coiled-coil domain containing 6	CCDC6	0.120709	0.348741	0	0.145674	0.201657	0	0.213296	0.0215041	1	0.00484386	0.999232	0	0.241421	0.394258	0	0.206674	0.298113	0	-0.0925874	0.854017	0	-0.0676225	0.939252	0	0.0249649	0.999957	0	-0.20183	0.549654	0	0.0347477	0.943252	0	0.236577	0.999975	0
A_23_P201567	NM_018061	NM_018061	55119	pre-mRNA processing factor 38B	PRPF38B	-0.036248	0.834856	0	0.0697533	0.656727	0	0.12094	0.244199	0	-0.0960396	0.999232	0	0.169019	0.628578	0	0.383747	0.0452844	1	-0.157188	0.742544	0	-0.0511865	0.961505	0	0.106001	0.999957	0	-0.479787	0.19801	0	-0.214728	0.59298	0	0.265059	0.999975	0
A_21_P0006055	ENST00000425153	ENST00000425153				0.0914325	0.867848	0	0.146348	0.790721	0	0.133596	0.739493	0	0.134251	0.999232	0	0.0851714	0.973408	0	-0.529656	0.425184	0	-0.0421633	0.987981	0	0.0127527	0.998599	0	0.054916	0.999957	0	0.663908	0.532742	0	0.614828	0.622098	0	-0.04908	0.999975	0
A_33_P3256695	NM_017892	NM_017892	55660	pre-mRNA processing factor 40 homolog A	PRPF40A	0.0594604	0.680276	0	-0.120495	0.280864	0	-0.047075	0.684987	0	-0.0521571	0.999232	0	0.058669	0.916501	0	-0.0933349	0.669953	0	0.106535	0.813703	0	-0.0734195	0.927278	0	-0.179955	0.999957	0	0.0411779	0.922808	0	0.152004	0.686624	0	0.110826	0.999975	0
A_33_P3300142	NM_001257999	NM_001257999	51479	ankyrin repeat and FYVE domain containing 1	ANKFY1	0.186971	0.408531	0	0.21137	0.299287	0	0.0874371	0.673402	0	0.218036	0.999232	0	0.202748	0.771138	0	-0.104313	0.808845	0	0.0995337	0.927887	0	0.123933	0.934949	0	0.0243989	0.999957	0	0.322349	0.579738	0	0.307061	0.64541	0	-0.0152881	0.999975	0
A_33_P3294821	NM_177998	NM_177998	133060	otopetrin 1	OTOP1	0.106559	0.474351	0	0.0108632	0.966076	0	0.0628242	0.622681	0	-0.0298248	0.999232	0	-0.0448891	0.949964	0	-0.0159738	0.961607	0	0.0437349	0.959846	0	-0.051961	0.961994	0	-0.0956959	0.999957	0	-0.013851	0.978545	0	-0.0289152	0.957088	0	-0.0150642	0.999975	0
A_24_P406714	NM_004641	NM_004641	8028	MLLT10, histone lysine methyltransferase DOT1L cofactor	MLLT10	-0.104347	0.369321	0	-0.0495689	0.729899	0	0.00702762	0.961292	0	-0.045874	0.999232	0	0.0210611	0.977025	0	-0.055434	0.805379	0	-0.111374	0.787204	0	-0.0565965	0.944629	0	0.0547779	0.999957	0	0.00956006	0.982976	0	0.0764951	0.851874	0	0.066935	0.999975	0
A_23_P123330	NM_000989	NM_000989	6156	ribosomal protein L30	RPL30	0.325432	0.0514809	0	0.272578	0.0975042	0	0.333553	0.017759	1	-0.0183979	0.999232	0	0.241109	0.641041	0	0.556309	0.0471169	1	-0.00812082	0.996063	0	-0.0609744	0.968008	0	-0.0528536	0.999957	0	-0.574706	0.260422	0	-0.3152	0.591692	0	0.259507	0.999975	0
A_23_P110492	NM_005885	NM_005885	10299	membrane associated ring-CH-type finger 6	MARCH6	0.0105559	0.939298	0	-0.0894223	0.30571	0	-0.0581759	0.464441	0	-0.0164859	0.999232	0	0.0073889	0.990946	0	-0.1887	0.174293	0	0.0687318	0.850376	0	-0.0312464	0.966456	0	-0.0999782	0.999957	0	0.172214	0.473073	0	0.196089	0.473523	0	0.0238748	0.999975	0
A_23_P362191	NR_026951	NR_026951	284029	long intergenic non-protein coding RNA 324	LINC00324	-0.00354934	0.985855	0	-0.0383892	0.819297	0	0.0147191	0.914762	0	-0.00184669	0.999232	0	-0.0119762	0.989756	0	0.222876	0.218242	0	-0.0182684	0.981865	0	-0.0531083	0.952131	0	-0.0348399	0.999957	0	-0.224723	0.466371	0	-0.234852	0.506152	0	-0.0101295	0.999975	0
A_23_P258978	NM_002077	NM_002077	2800	golgin A1	GOLGA1	-0.0957687	0.444309	0	-0.0918733	0.441574	0	0.0149576	0.911678	0	-0.0806507	0.999232	0	-0.0988345	0.800207	0	0.142241	0.466788	0	-0.110726	0.795042	0	-0.106831	0.87537	0	0.00389542	0.999957	0	-0.222892	0.461317	0	-0.241076	0.486726	0	-0.0181838	0.999975	0
A_23_P153286	NM_006630	NM_006630	10780	zinc finger protein 234	ZNF234	0.0342628	0.838726	0	-0.0689157	0.645862	0	0.0601101	0.608703	0	-0.05311	0.999232	0	0.0340883	0.960454	0	0.00424088	0.990682	0	-0.0258473	0.978717	0	-0.129026	0.86851	0	-0.103179	0.999957	0	-0.0573509	0.895365	0	0.0298474	0.951776	0	0.0871983	0.999975	0
A_23_P202708	NM_003682	NM_003682	8567	MAP kinase activating death domain	MADD	-0.206305	0.0688573	0	-0.11093	0.386999	0	-0.0652714	0.578793	0	-0.111315	0.999232	0	-0.173679	0.605531	0	-0.0775254	0.757014	0	-0.141034	0.761759	0	-0.0456583	0.966283	0	0.0953755	0.999957	0	-0.0337894	0.941869	0	-0.096154	0.835973	0	-0.0623646	0.999975	0
A_23_P2474	NM_016319	NM_016319	50813	COP9 signalosome subunit 7A	COPS7A	-0.204866	0.0410662	-1	-0.03198	0.85118	0	0.0173558	0.895631	0	0.0121319	0.999232	0	-0.181989	0.516504	0	-0.00378642	0.990743	0	-0.222222	0.685006	0	-0.0493358	0.955259	0	0.172886	0.999957	0	0.0159183	0.971072	0	-0.178202	0.621824	0	-0.19412	0.999975	0
A_33_P3681776	NR_029409	NR_029409	255512	TOLLIP antisense RNA 1 (head to head)	TOLLIP-AS1	0.149312	0.396804	0	0.0509537	0.833337	0	0.0702385	0.663873	0	-0.0363811	0.999232	0	-0.0858635	0.912419	0	-0.00794469	0.986484	0	0.0790736	0.925645	0	-0.0192848	0.987989	0	-0.0983584	0.999957	0	-0.0284364	0.966119	0	-0.0779188	0.901356	0	-0.0494824	0.999975	0
A_23_P99027	NM_002834	NM_002834	5781	protein tyrosine phosphatase, non-receptor type 11	PTPN11	-0.0776642	0.513523	0	-0.0528941	0.686858	0	0.013826	0.911398	0	-0.0906532	0.999232	0	0.00984664	0.989907	0	0.105075	0.572041	0	-0.0914902	0.824791	0	-0.0667201	0.925908	0	0.0247701	0.999957	0	-0.195728	0.485694	0	-0.0952282	0.796692	0	0.1005	0.999975	0
A_21_P0001112	ENST00000418471	ENST00000418471				-0.0235879	0.900658	0	0.00896108	0.972036	0	-0.0985831	0.374231	0	-0.0114329	0.999232	0	0.0568944	0.933997	0	-0.2386	0.247546	0	0.0749952	0.903022	0	0.107544	0.888161	0	0.032549	0.999957	0	0.227167	0.521702	0	0.295494	0.454903	0	0.0683273	0.999975	0
A_21_P0000200	NM_024596	NM_024596	79648	microcephalin 1	MCPH1	-0.00948232	0.951635	0	0.0249745	0.876596	0	-0.0643523	0.475259	0	0.0102245	0.999232	0	-0.0558627	0.904985	0	-0.141283	0.40635	0	0.05487	0.91157	0	0.0893269	0.881382	0	0.0344569	0.999957	0	0.151508	0.591302	0	0.0854205	0.816071	0	-0.0660871	0.999975	0
A_23_P92281	NM_014170	NM_014170	29083	GTP binding protein 8 (putative)	GTPBP8	0.117888	0.252116	0	0.0594619	0.632061	0	0.163799	0.0363415	1	-0.109843	0.999232	0	0.0344816	0.950615	0	0.124699	0.485027	0	-0.0459119	0.935216	0	-0.104337	0.873679	0	-0.0584256	0.999957	0	-0.234542	0.394464	0	-0.0902176	0.808571	0	0.144324	0.999975	0
A_33_P3224020	BC033982	BC033982				-0.0135613	0.977133	0	0.0626938	0.896375	0	0.147831	0.591843	0	0.111975	0.999232	0	0.0656107	0.97257	0	-0.608375	0.178292	0	-0.161392	0.909908	0	-0.0851372	0.969173	0	0.0762552	0.999957	0	0.72035	0.355566	0	0.673985	0.444022	0	-0.0463648	0.999975	0
A_23_P59481	NM_014671	NM_014671	9690	ubiquitin protein ligase E3C	UBE3C	-0.00897251	0.945347	0	-0.0687908	0.442969	0	0.00736227	0.945704	0	0.0493312	0.999232	0	-0.0135082	0.980529	0	-0.0424872	0.807774	0	-0.0163348	0.979808	0	-0.0761531	0.880221	0	-0.0598183	0.999957	0	0.0918184	0.717232	0	0.028979	0.930872	0	-0.0628394	0.999975	0
A_33_P3224680	ENST00000370143	ENST00000370143				-0.0407941	0.79219	0	0.00396043	0.986879	0	0.0587377	0.591358	0	-0.256222	0.999232	0	0.0662585	0.900143	0	0.183742	0.332906	0	-0.0995317	0.831505	0	-0.0547772	0.950443	0	0.0447545	0.999957	0	-0.439964	0.191582	0	-0.117484	0.769308	0	0.322481	0.999975	0
A_23_P209652	NM_017759	NM_017759	54891	INO80 complex subunit D	INO80D	0.0224548	0.938574	0	-0.000521518	0.999298	0	0.0723515	0.705051	0	-0.124736	0.999232	0	-0.141582	0.844864	0	-0.145266	0.687038	0	-0.0498967	0.971216	0	-0.072873	0.963257	0	-0.0229763	0.999957	0	0.02053	0.977343	0	0.00368408	0.996171	0	-0.0168459	0.999975	0
A_21_P0007638	ENST00000547114	ENST00000547114				0.0397356	0.91664	0	0.142233	0.644013	0	-0.09681	0.704845	0	0.0476996	0.999232	0	-0.157832	0.886151	0	-0.467018	0.243113	0	0.136546	0.91157	0	0.239043	0.87537	0	0.102497	0.999957	0	0.514718	0.445337	0	0.309186	0.710323	0	-0.205532	0.999975	0
A_21_P0012880	ENST00000493082	ENST00000493082				0.0318124	0.930825	0	0.0828101	0.811036	0	-0.023367	0.938884	0	0.0959096	0.999232	0	0.0508777	0.974101	0	-0.253783	0.553559	0	0.0551794	0.976135	0	0.106177	0.954985	0	0.0509976	0.999957	0	0.349692	0.60335	0	0.30466	0.697423	0	-0.0450319	0.999975	0
A_24_P295590	NM_032023	NM_032023	83937	Ras association domain family member 4	RASSF4	-0.0903487	0.438234	0	0.0354938	0.817772	0	-0.0292284	0.79505	0	0.0567558	0.999232	0	-0.0457915	0.934494	0	0.219364	0.17967	0	-0.0611203	0.902414	0	0.0647222	0.93062	0	0.125843	0.999957	0	-0.162609	0.579738	0	-0.265156	0.402241	0	-0.102547	0.999975	0
A_33_P3317558	NR_003521	NR_003521	339005	WAS protein homolog associated with actin, golgi membranes and microtubules pseudogene 3	WHAMMP3	-0.0586559	0.693182	0	0.00255251	0.991454	0	-0.0327416	0.794411	0	-0.0317592	0.999232	0	0.00642866	0.992457	0	-0.0817387	0.722134	0	-0.0259143	0.977229	0	0.0352941	0.968684	0	0.0612084	0.999957	0	0.0499795	0.907044	0	0.0881673	0.839737	0	0.0381878	0.999975	0
A_33_P3280066	NM_012232	NM_012232	284119	caveolae associated protein 1	CAVIN1	-0.0948304	0.511751	0	-0.0500491	0.774871	0	-0.269069	0.00500723	-1	0.0611143	0.999232	0	-0.0840497	0.874365	0	-0.358023	0.0591993	0	0.174239	0.714296	0	0.21902	0.827784	0	0.0447813	0.999957	0	0.419137	0.248244	0	0.273973	0.479088	0	-0.145164	0.999975	0
A_21_P0003558	TCONS_00007955	TCONS_00007955				-0.0290857	0.851628	0	0.0734382	0.570984	0	-0.0614016	0.559159	0	0.194629	0.999232	0	0.113926	0.755263	0	-0.142259	0.466512	0	0.0323158	0.966272	0	0.13484	0.851157	0	0.102524	0.999957	0	0.336888	0.272006	0	0.256185	0.455355	0	-0.0807033	0.999975	0
A_33_P3257312	NM_015104	NM_015104	23130	autophagy related 2A	ATG2A	-0.369057	0.00257461	-1	-0.338218	0.00239824	-1	-0.388988	0.000227376	-1	-0.123327	0.999232	0	-0.135595	0.763619	0	-0.253286	0.244485	0	0.0199309	0.982652	0	0.0507702	0.96589	0	0.0308393	0.999957	0	0.129959	0.757574	0	0.117691	0.813119	0	-0.0122677	0.999975	0
A_23_P104741	NM_032531	NM_032531	84623	kirre like nephrin family adhesion molecule 3	KIRREL3	0.164183	0.398613	0	-0.00406465	0.991284	0	-0.0442652	0.824055	0	0.0653418	0.999232	0	-0.0994728	0.905491	0	-0.0867224	0.818891	0	0.208449	0.755439	0	0.0402005	0.978128	0	-0.168248	0.999957	0	0.152064	0.789429	0	-0.0127504	0.986481	0	-0.164815	0.999975	0
A_23_P164000	NM_015670	NM_015670	26168	SUMO specific peptidase 3	SENP3	-0.00845786	0.969138	0	0.000863464	0.997647	0	0.0979943	0.407272	0	0.0328416	0.999232	0	-0.0120629	0.990427	0	-0.00735872	0.984165	0	-0.106452	0.847046	0	-0.0971308	0.908337	0	0.00932132	0.999957	0	0.0402003	0.935376	0	-0.00470416	0.993638	0	-0.0449045	0.999975	0
A_32_P90483	NM_178509	NM_178509	252983	syntaxin binding protein 4	STXBP4	0.0885499	0.398613	0	-0.0354372	0.79931	0	0.0921163	0.246589	0	-0.00234848	0.999232	0	-0.126535	0.64101	0	0.104825	0.546813	0	-0.0035664	0.996805	0	-0.127554	0.850149	0	-0.123987	0.999957	0	-0.107173	0.712655	0	-0.231359	0.433806	0	-0.124186	0.999975	0
A_33_P3324409	TCONS_l2_00004998	TCONS_l2_00004998				0.204365	0.317715	0	-0.0446856	0.888984	0	0.089979	0.641727	0	0.0445661	0.999232	0	0.161446	0.82399	0	-0.15207	0.68723	0	0.114386	0.902738	0	-0.134665	0.914937	0	-0.249051	0.999957	0	0.196636	0.744288	0	0.313516	0.621523	0	0.11688	0.999975	0
A_23_P17512	NM_080820	NM_080820	92675	D-tyrosyl-tRNA deacylase 1	DTD1	0.0653603	0.489465	0	-0.0177915	0.897535	0	0.105341	0.102156	0	-0.0158107	0.999232	0	-0.0614397	0.848541	0	0.140591	0.296033	0	-0.0399809	0.926606	0	-0.123133	0.835508	0	-0.0831518	0.999957	0	-0.156402	0.487806	0	-0.202031	0.420142	0	-0.0456291	0.999975	0
A_23_P121082	NM_000158	NM_000158	2632	1,4-alpha-glucan branching enzyme 1	GBE1	-0.15869	0.155612	0	-0.271215	0.00476287	-1	-0.0607859	0.581333	0	-0.126195	0.999232	0	-0.0982094	0.813502	0	-0.313241	0.0774943	0	-0.0979046	0.839282	0	-0.210429	0.827784	0	-0.112525	0.999957	0	0.187046	0.562459	0	0.215032	0.555859	0	0.0279856	0.999975	0
A_33_P3287113	ENST00000503548	ENST00000503548				0.324692	0.139207	0	0.21623	0.3533	0	0.0785357	0.743746	0	0.302663	0.999232	0	0.31886	0.60849	0	-0.0197524	0.972477	0	0.246156	0.775121	0	0.137695	0.934613	0	-0.108461	0.999957	0	0.322416	0.626023	0	0.338612	0.646539	0	0.0161962	0.999975	0
A_33_P3283061	ENST00000568752	ENST00000568752				0.121001	0.600712	0	0.190465	0.316448	0	-0.00287508	0.991175	0	0.111858	0.999232	0	0.0644406	0.95076	0	-0.23174	0.491073	0	0.123876	0.88368	0	0.19334	0.87402	0	0.0694647	0.999957	0	0.343597	0.512624	0	0.29618	0.630733	0	-0.047417	0.999975	0
A_23_P257503	NM_003922	NM_003922	8925	HECT and RLD domain containing E3 ubiquitin protein ligase family member 1	HERC1	-0.2789	0.00501742	-1	-0.186149	0.0538959	0	-0.148353	0.0844191	0	-0.250269	0.999232	0	-0.105239	0.780973	0	-0.147498	0.442192	0	-0.130547	0.752488	0	-0.0377961	0.966988	0	0.0927508	0.999957	0	-0.102772	0.767543	0	0.0422586	0.92309	0	0.14503	0.999975	0
A_32_P51084	NM_015135	NM_015135	23165	nucleoporin 205	NUP205	-0.141312	0.139101	0	-0.0770375	0.479437	0	-0.0393308	0.700676	0	-0.145566	0.999232	0	-0.0884751	0.800207	0	-0.0597255	0.768337	0	-0.101981	0.787891	0	-0.0377066	0.965882	0	0.0642743	0.999957	0	-0.0858408	0.786227	0	-0.0287495	0.942835	0	0.0570912	0.999975	0
A_24_P389517	NM_031262	NM_031262	3190	heterogeneous nuclear ribonucleoprotein K	HNRNPK	-0.291634	0.00563386	-1	-0.120792	0.293769	0	-0.142455	0.122737	0	-0.132758	0.999232	0	-0.147061	0.66549	0	-0.0933589	0.680335	0	-0.149179	0.738659	0	0.0216624	0.981347	0	0.170841	0.999957	0	-0.0393995	0.927779	0	-0.0537025	0.90577	0	-0.014303	0.999975	0
A_21_P0008673	TCONS_00023505	TCONS_00023505				0.0209134	0.900646	0	-0.0489623	0.753778	0	-0.0470563	0.684117	0	0.118507	0.999232	0	-0.0509712	0.933372	0	0.0166334	0.954151	0	0.0679697	0.898422	0	-0.00190603	0.999246	0	-0.0698758	0.999957	0	0.101874	0.775433	0	-0.0676046	0.876251	0	-0.169478	0.999975	0
A_23_P12343	NM_000849	NM_000849	2947	glutathione S-transferase mu 3	GSTM3	0.169321	0.0273227	1	0.0547897	0.588667	0	0.0175041	0.860635	0	-0.0136798	0.999232	0	0.0461949	0.910412	0	0.0496	0.778822	0	0.151817	0.685006	0	0.0372856	0.957604	0	-0.114532	0.999957	0	-0.0632797	0.82277	0	-0.00340503	0.992823	0	0.0598747	0.999975	0
A_23_P121345	NM_018138	NM_018138	55171	TBCC domain containing 1	TBCCD1	-0.0553582	0.385109	0	-0.0242565	0.76762	0	0.00443094	0.953704	0	-0.0363964	0.999232	0	-0.00809954	0.985218	0	0.0206403	0.875475	0	-0.0597892	0.79034	0	-0.0286874	0.948862	0	0.0311018	0.999957	0	-0.0570367	0.755393	0	-0.0287398	0.900359	0	0.0282969	0.999975	0
A_23_P121506	NM_003704	NM_003704	8603	family with sequence similarity 193 member A	FAM193A	-0.156158	0.0135985	-1	-0.153483	0.0103209	-1	-0.107445	0.0508162	0	-0.0796963	0.999232	0	-0.119103	0.504387	0	-0.0113722	0.949878	0	-0.0487121	0.877061	0	-0.0460378	0.927136	0	0.00267433	0.999957	0	-0.0683242	0.757935	0	-0.107731	0.640324	0	-0.0394068	0.999975	0
A_23_P162127	NM_021825	NM_021825	60492	coiled-coil domain containing 90B	CCDC90B	0.0400021	0.846915	0	0.0888697	0.621558	0	0.161019	0.177992	0	-0.144663	0.999232	0	0.0409136	0.962105	0	0.141035	0.609864	0	-0.121017	0.84288	0	-0.0721493	0.949764	0	0.0488675	0.999957	0	-0.285697	0.483065	0	-0.100121	0.858583	0	0.185576	0.999975	0
A_24_P81841	NM_004064	NM_004064	1027	cyclin dependent kinase inhibitor 1B	CDKN1B	-0.0708763	0.676583	0	-0.0180191	0.94115	0	0.0888969	0.463904	0	-0.104505	0.999232	0	0.139875	0.748473	0	-0.0527429	0.85884	0	-0.159773	0.74904	0	-0.106916	0.896355	0	0.0528572	0.999957	0	-0.0517619	0.918144	0	0.192618	0.660911	0	0.24438	0.999975	0
A_23_P256231	NM_032145	NM_032145	84085	F-box protein 30	FBXO30	0.125164	0.441627	0	0.151471	0.285981	0	0.238368	0.0325594	1	-0.0222149	0.999232	0	0.206111	0.600239	0	0.127087	0.642111	0	-0.113205	0.849706	0	-0.0868971	0.935319	0	0.0263077	0.999957	0	-0.149302	0.737357	0	0.0790239	0.886184	0	0.228326	0.999975	0
A_33_P3290909	NM_001281463	NM_001281463	8243	structural maintenance of chromosomes 1A	SMC1A	-0.188069	0.276486	0	-0.284971	0.0526828	0	-0.284069	0.0281461	-1	-0.248322	0.999232	0	-0.358556	0.339408	0	-0.328495	0.221332	0	0.0959997	0.906499	0	-0.000901612	0.999851	0	-0.0969014	0.999957	0	0.0801732	0.894928	0	-0.0300613	0.967286	0	-0.110234	0.999975	0
A_23_P204087	NM_016817	NM_016817	4939	2'-5'-oligoadenylate synthetase 2	OAS2	-0.0741574	0.845548	0	0.352074	0.162634	0	-0.103266	0.712309	0	-0.0187015	0.999232	0	-0.477157	0.478403	0	-0.132599	0.818748	0	0.0291088	0.988112	0	0.45534	0.829649	0	0.426232	0.999957	0	0.113897	0.90918	0	-0.344559	0.703566	0	-0.458456	0.999975	0
A_23_P146849	NM_005503	NM_005503	321	amyloid beta precursor protein binding family A member 2	APBA2	-0.0264813	0.883056	0	-0.0749116	0.619715	0	0.0611193	0.614235	0	-0.0268014	0.999232	0	0.0116382	0.989907	0	-0.0138777	0.96588	0	-0.0876006	0.871739	0	-0.136031	0.867538	0	-0.0484303	0.999957	0	-0.0129237	0.979224	0	0.025516	0.960927	0	0.0384396	0.999975	0
A_23_P28375	NM_178439	NM_178439	64395	germ cell-less, spermatogenesis associated 1	GMCL1	-0.0652164	0.663239	0	-0.143683	0.197927	0	0.0985218	0.329611	0	-0.11116	0.999232	0	0.0544753	0.93091	0	-0.165328	0.418615	0	-0.163738	0.716682	0	-0.242205	0.827784	0	-0.0784666	0.999957	0	0.0541682	0.900439	0	0.219803	0.558887	0	0.165635	0.999975	0
A_23_P10559	NM_001080395	NM_001080395	9625	apoptosis associated tyrosine kinase	AATK	-0.240435	0.0395573	-1	-0.263726	0.0163784	-1	-0.226176	0.0224476	-1	-0.000285216	0.999672	0	0.134696	0.748389	0	-0.162505	0.475615	0	-0.0142587	0.987981	0	-0.0375494	0.969487	0	-0.0232907	0.999957	0	0.16222	0.670089	0	0.297201	0.456385	0	0.134981	0.999975	0
A_23_P74663	NM_005681	NM_005681	9015	TATA-box binding protein associated factor, RNA polymerase I subunit A	TAF1A	-0.0757978	0.510471	0	0.0406648	0.76914	0	-0.0115156	0.926276	0	-0.000927931	0.999232	0	-0.0369986	0.945132	0	0.0900055	0.628502	0	-0.0642821	0.88368	0	0.0521804	0.944629	0	0.116463	0.999957	0	-0.0909334	0.770106	0	-0.127004	0.698652	0	-0.0360707	0.999975	0
A_23_P78122	NM_078471	NM_078471	399687	myosin XVIIIA	MYO18A	-0.0858839	0.615508	0	-0.0293222	0.90108	0	-0.218835	0.0418685	-1	-0.114773	0.999232	0	-0.16177	0.706554	0	-0.194131	0.417639	0	0.132951	0.808117	0	0.189512	0.84917	0	0.0565617	0.999957	0	0.0793575	0.868703	0	0.0323609	0.954884	0	-0.0469966	0.999975	0
A_24_P408603	NM_171998	NM_171998	116442	RAB39B, member RAS oncogene family	RAB39B	0.118711	0.34208	0	0.0476799	0.773419	0	0.0609798	0.588821	0	0.0150832	0.999232	0	0.191187	0.524033	0	-0.181709	0.359753	0	0.0577312	0.925645	0	-0.0132999	0.987989	0	-0.0710311	0.999957	0	0.196792	0.549153	0	0.372896	0.318553	0	0.176104	0.999975	0
A_19_P00320275	NR_104228	NR_104228	286411	long intergenic non-protein coding RNA 632	LINC00632	0.169867	0.545016	0	0.287526	0.198013	0	0.0995239	0.679102	0	0.412489	0.999232	0	0.278661	0.699814	0	-0.24644	0.568151	0	0.0703432	0.965151	0	0.188003	0.896869	0	0.117659	0.999957	0	0.658929	0.311006	0	0.525101	0.477879	0	-0.133828	0.999975	0
A_33_P3222218	NM_001142651	NM_001142651	54492	neuralized E3 ubiquitin protein ligase 1B	NEURL1B	0.169042	0.234873	0	0.137572	0.333872	0	-0.00355116	0.986747	0	-0.0128014	0.999232	0	0.0357203	0.966877	0	-0.101491	0.714313	0	0.172593	0.748068	0	0.141123	0.874631	0	-0.0314701	0.999957	0	0.0886892	0.852203	0	0.137211	0.78556	0	0.0485218	0.999975	0
A_23_P137586	NM_006582	NM_006582	10691	glucocorticoid modulatory element binding protein 1	GMEB1	-0.0192693	0.895974	0	-0.0916018	0.374834	0	-0.129537	0.099703	0	-0.0622249	0.999232	0	-0.150713	0.564699	0	0.080239	0.679914	0	0.110268	0.77115	0	0.0379354	0.965882	0	-0.0723325	0.999957	0	-0.142464	0.622081	0	-0.230952	0.454974	0	-0.0884878	0.999975	0
A_23_P83175	NM_001010915	NM_001010915	401494	3-hydroxyacyl-CoA dehydratase 4	HACD4	0.0648432	0.653072	0	0.123102	0.274888	0	0.141255	0.120444	0	-0.00464324	0.999232	0	0.0882134	0.843538	0	0.312263	0.0775551	0	-0.0764117	0.882686	0	-0.0181527	0.982814	0	0.058259	0.999957	0	-0.316906	0.314487	0	-0.224049	0.536901	0	0.0928567	0.999975	0
A_23_P218997	NM_013232	NM_013232	10016	programmed cell death 6	PDCD6	-0.000810479	0.997274	0	0.000962424	0.997285	0	0.132191	0.106942	0	-0.075794	0.999232	0	0.0817665	0.8401	0	0.187287	0.268986	0	-0.133002	0.738659	0	-0.131229	0.850492	0	0.0017729	0.999957	0	-0.263081	0.354288	0	-0.10552	0.774231	0	0.15756	0.999975	0
A_33_P3322909	NM_001278513	NM_001278513	8451	cullin 4A	CUL4A	-0.118501	0.277393	0	0.0279373	0.868582	0	-0.0981956	0.267081	0	0.0225	0.999232	0	-0.0384806	0.947295	0	0.343338	0.0351699	1	-0.0203058	0.979833	0	0.126133	0.858576	0	0.146439	0.999957	0	-0.320838	0.274137	0	-0.381819	0.282103	0	-0.0609806	0.999975	0
A_23_P147109	NM_017723	NM_017723	54863	torsin family 4 member A	TOR4A	-0.131569	0.203614	0	0.036256	0.813079	0	-0.0294424	0.794411	0	0.128128	0.999232	0	-0.111265	0.74033	0	0.133029	0.468731	0	-0.102126	0.796538	0	0.0656984	0.92893	0	0.167825	0.999957	0	-0.00490102	0.990779	0	-0.244294	0.444384	0	-0.239393	0.999975	0
A_23_P31532	NM_080660	NM_080660	92092	zinc finger CCCH-type containing, antiviral 1 like	ZC3HAV1L	0.0860183	0.592317	0	0.0776427	0.633952	0	-0.0361857	0.801762	0	-0.00300479	0.999232	0	-0.11044	0.822397	0	-0.0981952	0.704865	0	0.122204	0.81927	0	0.113828	0.887155	0	-0.00837557	0.999957	0	0.0951904	0.827229	0	-0.0122448	0.983442	0	-0.107435	0.999975	0
A_23_P350074	NM_001039876	NM_001039876	163183	spectrin repeat containing nuclear envelope family member 4	SYNE4	0.0766935	0.641319	0	-0.0732167	0.658413	0	-0.130116	0.232701	0	-0.086844	0.999232	0	-0.0342886	0.966325	0	-0.0975385	0.706046	0	0.206809	0.701072	0	0.0568992	0.958198	0	-0.14991	0.999957	0	0.0106945	0.984168	0	0.0632499	0.901791	0	0.0525554	0.999975	0
A_24_P349560	NM_001968	NM_001968	1977	eukaryotic translation initiation factor 4E	EIF4E	0.0503169	0.663185	0	0.0401168	0.748907	0	0.0455807	0.607887	0	-0.0283542	0.999232	0	0.0931558	0.758528	0	0.121322	0.447662	0	0.0047362	0.995599	0	-0.00546388	0.995523	0	-0.0102001	0.999957	0	-0.149676	0.558091	0	-0.0281662	0.938458	0	0.12151	0.999975	0
A_23_P8539	NM_139179	NM_139179	221955	diacylglycerol lipase beta	DAGLB	-0.13314	0.221068	0	-0.0833671	0.485707	0	-0.0949286	0.300191	0	0.0520411	0.999232	0	0.0152548	0.984593	0	-0.0640139	0.774292	0	-0.038211	0.955908	0	0.0115615	0.988895	0	0.0497725	0.999957	0	0.116055	0.726904	0	0.0792687	0.848017	0	-0.0367863	0.999975	0
A_23_P106562	NM_000512	NM_000512	2588	galactosamine (N-acetyl)-6-sulfatase	GALNS	-0.250226	0.0452386	-1	-0.202302	0.102349	0	-0.15205	0.170375	0	-0.0435203	0.999232	0	0.0301896	0.973776	0	-0.0426398	0.894904	0	-0.0981768	0.868757	0	-0.0502528	0.966283	0	0.047924	0.999957	0	-0.000880417	0.998691	0	0.0728294	0.890138	0	0.0737098	0.999975	0
A_23_P78209	NM_002359	NM_002359	4097	MAF bZIP transcription factor G	MAFG	-0.08276	0.322205	0	-0.0684828	0.416179	0	-0.169664	0.00561875	-1	0.0266879	0.999232	0	-0.0297104	0.945238	0	-0.160411	0.20531	0	0.0869042	0.772104	0	0.101181	0.850492	0	0.0142771	0.999957	0	0.187099	0.387354	0	0.130701	0.608738	0	-0.0563983	0.999975	0
A_23_P122228	NM_004553	NM_004553	4726	NADH:ubiquinone oxidoreductase subunit S6	NDUFS6	0.147336	0.114533	0	0.17557	0.0404144	1	0.0643843	0.472092	0	0.137996	0.999232	0	-0.038172	0.943877	0	0.295428	0.0500428	0	0.0829513	0.841143	0	0.111185	0.864814	0	0.0282341	0.999957	0	-0.157432	0.570888	0	-0.3336	0.308037	0	-0.176168	0.999975	0
A_21_P0010767	ENST00000430316	ENST00000430316				-0.0840207	0.569033	0	-0.179713	0.106148	0	-0.125072	0.214798	0	-0.0217273	0.999232	0	-0.0854821	0.867387	0	-0.178595	0.397834	0	0.0410515	0.959846	0	-0.0546406	0.955477	0	-0.0956921	0.999957	0	0.156868	0.666591	0	0.0931131	0.841355	0	-0.0637548	0.999975	0
A_23_P117506	NM_016029	NM_016029	51635	dehydrogenase/reductase 7	DHRS7	-0.0845469	0.577677	0	-0.0830261	0.574422	0	0.0790905	0.494003	0	-0.0181803	0.999232	0	0.0691717	0.908345	0	0.201586	0.338628	0	-0.163637	0.738371	0	-0.162117	0.850492	0	0.00152081	0.999957	0	-0.219766	0.530972	0	-0.132414	0.763763	0	0.0873521	0.999975	0
A_23_P99424	NM_003291	NM_003291	7174	tripeptidyl peptidase 2	TPP2	0.00156869	0.992846	0	-0.0587568	0.561506	0	-0.000272761	0.9977	0	-0.345093	0.0436835	-1	-0.0304384	0.949395	0	-0.0589468	0.735773	0	0.00184145	0.997941	0	-0.058484	0.921235	0	-0.0603254	0.999957	0	-0.286147	0.254555	0	0.0285084	0.935121	0	0.314655	0.999975	0
A_23_P313223	NM_138471	NM_138471	144097	spindlin interactor and repressor of chromatin binding	SPINDOC	0.101102	0.352903	0	0.0847493	0.437577	0	-0.127196	0.113936	0	0.01412	0.999232	0	-0.0680043	0.877434	0	-0.0196968	0.938389	0	0.228298	0.685006	0	0.211945	0.827784	0	-0.0163529	0.999957	0	0.0338169	0.928864	0	-0.0483074	0.902858	0	-0.0821243	0.999975	0
A_23_P150852	NM_015292	NM_015292	23344	extended synaptotagmin 1	ESYT1	-0.18971	0.22086	0	-0.125634	0.453269	0	0.0334049	0.851276	0	-0.143269	0.999232	0	-0.240196	0.546207	0	-0.0923858	0.770928	0	-0.223115	0.712348	0	-0.159038	0.873679	0	0.0640765	0.999957	0	-0.0508831	0.929382	0	-0.14781	0.790792	0	-0.0969269	0.999975	0
A_33_P3267305	NM_173595	NM_173595	283373	ankyrin repeat domain 52	ANKRD52	-0.0119264	0.945093	0	-0.0246433	0.893473	0	-0.141692	0.102407	0	-0.179759	0.999232	0	-0.156697	0.602066	0	-0.00255523	0.994318	0	0.129766	0.753842	0	0.117049	0.872196	0	-0.0127169	0.999957	0	-0.177204	0.567976	0	-0.154141	0.670734	0	0.0230627	0.999975	0
A_23_P382602	NM_004326	NM_004326	607	B cell CLL/lymphoma 9	BCL9	0.0249501	0.877078	0	0.0262005	0.886987	0	-0.118599	0.192884	0	0.0468221	0.999232	0	0.00473021	0.994564	0	-0.154762	0.425184	0	0.143549	0.738659	0	0.144799	0.850492	0	0.00125042	0.999957	0	0.201585	0.515807	0	0.159493	0.664511	0	-0.0420919	0.999975	0
A_21_P0006193	TCONS_00016098	TCONS_00016098				-0.0490383	0.728451	0	0.108234	0.310454	0	-0.0220178	0.859681	0	0.137123	0.999232	0	0.101862	0.781923	0	-0.0216372	0.935631	0	-0.0270205	0.973272	0	0.130252	0.851157	0	0.157273	0.999957	0	0.15876	0.60414	0	0.123499	0.735376	0	-0.0352612	0.999975	0
A_23_P112289	NM_003275	NM_003275	7111	tropomodulin 1	TMOD1	-0.115932	0.672932	0	-0.0316903	0.934978	0	0.233566	0.184109	0	0.101059	0.999232	0	0.231162	0.742159	0	-0.396796	0.259507	0	-0.349498	0.690317	0	-0.265257	0.850874	0	0.0842414	0.999957	0	0.497855	0.400728	0	0.627958	0.351074	0	0.130102	0.999975	0
A_23_P57277	NM_020152	NM_020152	56911	MAP3K7 C-terminal like	MAP3K7CL	-0.0250551	0.86282	0	-0.015553	0.931377	0	0.046321	0.648762	0	0.0780327	0.999232	0	-0.00596837	0.992262	0	-0.126561	0.482685	0	-0.0713761	0.872604	0	-0.061874	0.934239	0	0.00950212	0.999957	0	0.204594	0.461643	0	0.120593	0.728055	0	-0.0840011	0.999975	0
A_23_P109345	NM_004339	NM_004339	754	PTTG1 interacting protein	PTTG1IP	-0.121896	0.324548	0	-0.166981	0.116809	0	0.0355173	0.77897	0	-0.124586	0.999232	0	0.00704144	0.992262	0	0.0698254	0.771938	0	-0.157413	0.724943	0	-0.202498	0.828696	0	-0.0450849	0.999957	0	-0.194411	0.55394	0	-0.0627839	0.888195	0	0.131627	0.999975	0
A_19_P00317481	AK124562	AK124562				-0.0690656	0.580625	0	-0.055129	0.676639	0	0.104202	0.220581	0	0.0298803	0.999232	0	0.0188067	0.979788	0	-0.0541937	0.802388	0	-0.173268	0.685006	0	-0.159331	0.835508	0	0.0139366	0.999957	0	0.084074	0.801936	0	0.0730005	0.853741	0	-0.0110735	0.999975	0
A_23_P60339	NM_032307	NM_032307	84267	chromosome 9 open reading frame 64	C9orf64	-0.0360912	0.694172	0	0.0172578	0.88294	0	0.0218828	0.775895	0	-0.0692859	0.999232	0	-0.0676166	0.782416	0	-0.236062	0.0315522	-1	-0.0579739	0.843511	0	-0.00462498	0.994647	0	0.0533489	0.999957	0	0.166776	0.390861	0	0.168445	0.443359	0	0.00166926	0.999975	0
A_21_P0000102	NM_001190470	NM_001190470	100462981	MT-RNR2 like 2	MTRNR2L2	0.122798	0.638364	0	0.290036	0.130259	0	-0.0135341	0.961507	0	0.0975883	0.999232	0	0.195852	0.787504	0	0.162958	0.688441	0	0.136333	0.88368	0	0.303571	0.83957	0	0.167238	0.999957	0	-0.0653697	0.933704	0	0.0328943	0.971476	0	0.0982641	0.999975	0
A_23_P155103	NM_000026	NM_000026	158	adenylosuccinate lyase	ADSL	0.00857946	0.963367	0	0.0953761	0.45175	0	0.0649014	0.558722	0	-0.0439038	0.999232	0	0.0553967	0.928787	0	0.0871562	0.703756	0	-0.056322	0.929193	0	0.0304747	0.972889	0	0.0867966	0.999957	0	-0.13106	0.712655	0	-0.0317595	0.946387	0	0.0993005	0.999975	0
A_23_P404045	NM_005957	NM_005957	4524	methylenetetrahydrofolate reductase	MTHFR	-0.0333024	0.807686	0	0.0577098	0.641873	0	0.0405375	0.693205	0	0.0129014	0.999232	0	0.0371208	0.946367	0	0.0430619	0.843059	0	-0.0738399	0.859932	0	0.0171723	0.982814	0	0.0910122	0.999957	0	-0.0301605	0.935363	0	-0.00594118	0.988857	0	0.0242194	0.999975	0
A_32_P122754	NM_080655	NM_080655	91283	Myb/SANT DNA binding domain containing 3	MSANTD3	-0.0713331	0.611826	0	0.107002	0.361429	0	-0.0235597	0.859335	0	-0.107878	0.999232	0	-0.0339937	0.957942	0	0.143706	0.476767	0	-0.0477733	0.944737	0	0.130561	0.864148	0	0.178335	0.999957	0	-0.251584	0.420899	0	-0.1777	0.632382	0	0.073884	0.999975	0
A_23_P1145	NM_018109	NM_018109	55149	mitochondrial poly(A) polymerase	MTPAP	0.012205	0.919815	0	-0.0564103	0.526116	0	-0.00107042	0.99198	0	0.0429552	0.999232	0	-0.043283	0.90752	0	-0.0516823	0.744818	0	0.0132755	0.981617	0	-0.0553399	0.913414	0	-0.0686153	0.999957	0	0.0946375	0.686578	0	0.00839932	0.980691	0	-0.0862382	0.999975	0
A_33_P3311770	NM_213603	NM_213603	285989	zinc finger protein 789	ZNF789	0.0307607	0.884702	0	-0.0311619	0.899842	0	0.0584343	0.697922	0	-0.0164483	0.999232	0	0.0245919	0.980256	0	-0.00319284	0.994518	0	-0.0276736	0.980078	0	-0.0895962	0.934091	0	-0.0619225	0.999957	0	-0.0132555	0.982585	0	0.0277847	0.964519	0	0.0410402	0.999975	0
A_33_P3277943	NM_001286790	NM_001286790	246175	CCR4-NOT transcription complex subunit 6 like	CNOT6L	-0.043306	0.754287	0	-0.00647653	0.976316	0	0.105744	0.213478	0	-0.0547777	0.999232	0	0.142539	0.621692	0	0.0202946	0.937961	0	-0.14905	0.712348	0	-0.11222	0.867538	0	0.0368295	0.999957	0	-0.0750723	0.827048	0	0.122244	0.730247	0	0.197316	0.999975	0
A_33_P3407675	NM_001031800	NM_001031800	261726	TOR signaling pathway regulator	TIPRL	0.0229138	0.890454	0	0.00964179	0.965297	0	0.100361	0.295398	0	0.0182795	0.999232	0	-0.0304168	0.96494	0	0.186246	0.325804	0	-0.0774472	0.879058	0	-0.0907192	0.896355	0	-0.013272	0.999957	0	-0.167966	0.606857	0	-0.216663	0.547914	0	-0.0486963	0.999975	0
A_21_P0007502	NR_027345	NR_027345	100287569	long intergenic non-protein coding RNA 173	LINC00173	0.136198	0.714805	0	0.238656	0.434634	0	0.0210985	0.95462	0	0.192541	0.999232	0	0.222713	0.840226	0	-0.16228	0.784507	0	0.115099	0.946556	0	0.217558	0.901564	0	0.102458	0.999957	0	0.354821	0.674492	0	0.384993	0.683946	0	0.0301721	0.999975	0
A_21_P0010331	ENST00000430281	ENST00000430281				0.130648	0.396024	0	-0.0169845	0.948157	0	-0.0506702	0.729657	0	-0.00491101	0.999232	0	-0.0549771	0.943877	0	-0.348579	0.107579	0	0.181318	0.738659	0	0.0336857	0.975396	0	-0.147633	0.999957	0	0.343668	0.368066	0	0.293602	0.503972	0	-0.0500661	0.999975	0
A_19_P00800244	A_19_P00800244	A_19_P00800244				0.163384	0.481623	0	0.078959	0.784423	0	-0.0452036	0.84511	0	0.0305139	0.999232	0	0.17491	0.810384	0	-0.0854784	0.84529	0	0.208587	0.787891	0	0.124163	0.934091	0	-0.0844249	0.999957	0	0.115992	0.867631	0	0.260388	0.698003	0	0.144396	0.999975	0
A_23_P22499	NM_019067	NM_019067	54552	G protein nucleolar 3 like	GNL3L	-0.191219	0.0993858	0	-0.175868	0.117243	0	-0.0567189	0.645156	0	-0.0480787	0.999232	0	-0.121519	0.772447	0	-0.167005	0.438249	0	-0.1345	0.772698	0	-0.119149	0.87537	0	0.0153518	0.999957	0	0.118927	0.759079	0	0.0454868	0.926211	0	-0.0734398	0.999975	0
A_24_P212531	NM_152490	NM_152490	148789	beta-1,3-N-acetylgalactosaminyltransferase 2	B3GALNT2	-0.0664171	0.544288	0	-0.0322209	0.813104	0	0.00382907	0.975594	0	-0.0205697	0.999232	0	-0.0425306	0.93091	0	0.0786874	0.655296	0	-0.0702462	0.854936	0	-0.03605	0.964354	0	0.0341962	0.999957	0	-0.0992572	0.725475	0	-0.121218	0.692435	0	-0.0219609	0.999975	0
A_24_P69439	NM_030780	NM_030780	81034	solute carrier family 25 member 32	SLC25A32	0.0297352	0.885504	0	0.0684468	0.715398	0	0.14919	0.196839	0	-0.000376706	0.999672	0	0.166439	0.703257	0	0.0626599	0.838695	0	-0.119455	0.841143	0	-0.0807433	0.937066	0	0.0387116	0.999957	0	-0.0630366	0.904094	0	0.103779	0.848017	0	0.166815	0.999975	0
A_23_P11353	NM_005765	NM_005765	10159	ATPase H+ transporting accessory protein 2	ATP6AP2	-0.181301	0.0226443	-1	-0.16292	0.0346888	-1	-0.0924857	0.201755	0	-0.0213077	0.999232	0	-0.0557018	0.890649	0	-0.0843265	0.613172	0	-0.0888149	0.795042	0	-0.0704346	0.897071	0	0.0183804	0.999957	0	0.0630189	0.829413	0	0.0286247	0.936293	0	-0.0343942	0.999975	0
A_23_P137532	NM_000302	NM_000302	5351	procollagen-lysine,2-oxoglutarate 5-dioxygenase 1	PLOD1	-0.169091	0.104186	0	-0.198982	0.038376	-1	-0.133048	0.129397	0	-0.077014	0.999232	0	-0.196504	0.46856	0	0.0149526	0.958055	0	-0.0360428	0.961159	0	-0.0659341	0.935587	0	-0.0298913	0.999957	0	-0.0919666	0.796252	0	-0.211456	0.547155	0	-0.11949	0.999975	0
A_32_P857658	NM_001003	NM_001003	6176	ribosomal protein lateral stalk subunit P1	RPLP1	0.146137	0.203614	0	-0.00803873	0.972254	0	0.0134118	0.926805	0	-0.0832181	0.999232	0	0.0260575	0.972812	0	0.253223	0.163957	0	0.132725	0.761759	0	-0.0214505	0.981347	0	-0.154176	0.999957	0	-0.336441	0.291686	0	-0.227165	0.531247	0	0.109276	0.999975	0
A_21_P0014426	NR_040535	NR_040535	100506472	uncharacterized LOC100506472	LOC100506472	-0.0213531	0.885709	0	-0.082292	0.459629	0	0.00750036	0.954974	0	-0.0141242	0.999232	0	-0.0508522	0.921556	0	-0.0234535	0.924506	0	-0.0288535	0.968258	0	-0.0897923	0.885246	0	-0.0609388	0.999957	0	0.00932932	0.982502	0	-0.0273987	0.946958	0	-0.036728	0.999975	0
A_23_P130488	NM_000400	NM_000400	2068	ERCC excision repair 2, TFIIH core complex helicase subunit	ERCC2	-0.0939987	0.455701	0	-0.0790847	0.529815	0	-0.0423062	0.711735	0	0.00884018	0.999232	0	-0.0357795	0.953892	0	0.0716739	0.74906	0	-0.0516925	0.933814	0	-0.0367786	0.968008	0	0.0149139	0.999957	0	-0.0628338	0.869936	0	-0.107453	0.787348	0	-0.0446197	0.999975	0
A_23_P200443	NM_003029	NM_003029	6464	SHC adaptor protein 1	SHC1	-0.0858917	0.345349	0	-0.043636	0.692858	0	-0.0681703	0.353753	0	-0.0136798	0.999232	0	-0.0497467	0.900143	0	0.0593155	0.727182	0	-0.0177214	0.979254	0	0.0245343	0.969487	0	0.0422557	0.999957	0	-0.0729953	0.789484	0	-0.109062	0.701051	0	-0.0360669	0.999975	0
A_32_P8402	NM_006372	NM_006372	10492	synaptotagmin binding cytoplasmic RNA interacting protein	SYNCRIP	-0.066714	0.553401	0	-0.0895958	0.353185	0	-0.0816583	0.30657	0	-0.0937673	0.999232	0	-0.207347	0.319336	0	-0.183923	0.224308	0	0.0149443	0.982652	0	-0.00793743	0.991601	0	-0.0228817	0.999957	0	0.0901558	0.760892	0	-0.0234241	0.951683	0	-0.11358	0.999975	0
A_23_P108501	NM_004438	NM_004438	2043	EPH receptor A4	EPHA4	0.011989	0.946031	0	-0.195912	0.0477697	-1	-0.129964	0.15258	0	-0.0884739	0.999232	0	-0.220018	0.420924	0	-0.151768	0.443445	0	0.141953	0.742873	0	-0.0659475	0.936034	0	-0.207901	0.999957	0	0.0632939	0.87196	0	-0.0682503	0.875651	0	-0.131544	0.999975	0
A_23_P102471	NM_000251	NM_000251	4436	mutS homolog 2	MSH2	0.0884749	0.594803	0	0.0384986	0.856946	0	0.120777	0.295311	0	-0.133096	0.999232	0	0.0848391	0.891281	0	0.0337778	0.91758	0	-0.0323022	0.975559	0	-0.0822785	0.935432	0	-0.0499763	0.999957	0	-0.166874	0.681275	0	0.0510613	0.924647	0	0.217935	0.999975	0
A_23_P12189	NM_213566	NM_213566	1676	DNA fragmentation factor subunit alpha	DFFA	0.0815099	0.37194	0	-2.73636e-05	0.999855	0	-0.0239684	0.793693	0	0.0415392	0.999232	0	-0.0140356	0.980256	0	-0.00389218	0.987804	0	0.105478	0.744632	0	0.023941	0.969969	0	-0.0815372	0.999957	0	0.0454314	0.87864	0	-0.0101434	0.978216	0	-0.0555748	0.999975	0
A_33_P3333667	NM_001270380	NM_001270380	143570	X-ray radiation resistance associated 1	XRRA1	-0.0391143	0.769298	0	-0.0160534	0.928002	0	-0.021142	0.854314	0	0.0112023	0.999232	0	-0.0850125	0.813502	0	-0.0778753	0.687233	0	-0.0179723	0.980829	0	0.00508864	0.99681	0	0.0230609	0.999957	0	0.0890776	0.776897	0	-0.00713721	0.986481	0	-0.0962148	0.999975	0
A_23_P107036	NM_003876	NM_003876	8834	transmembrane protein 11	TMEM11	0.0437688	0.606081	0	0.042601	0.611803	0	0.0324231	0.637324	0	0.0554822	0.999232	0	0.0760821	0.727596	0	0.153137	0.159805	0	0.0113456	0.981865	0	0.0101779	0.9852	0	-0.00116778	0.999957	0	-0.0976549	0.627987	0	-0.077055	0.747263	0	0.0205999	0.999975	0
A_33_P3310780	NM_005231	NM_005231	2017	cortactin	CTTN	-0.198434	0.245975	0	-0.328371	0.0226474	-1	-0.0536118	0.766223	0	-0.0134328	0.999232	0	-0.296481	0.477531	0	-0.488561	0.0580387	0	-0.144823	0.83593	0	-0.27476	0.835508	0	-0.129937	0.999957	0	0.475128	0.306505	0	0.192079	0.739192	0	-0.283049	0.999975	0
A_23_P101237	NM_031446	NM_031446	83608	chromosome 18 open reading frame 21	C18orf21	0.0884654	0.271245	0	0.114573	0.104017	0	0.130162	0.0310299	1	0.0447034	0.999232	0	0.0888001	0.716896	0	0.328565	0.0071769	1	-0.0416962	0.918013	0	-0.0155882	0.980712	0	0.026108	0.999957	0	-0.283862	0.223144	0	-0.239765	0.329521	0	0.0440967	0.999975	0
A_19_P00321743	ENST00000586949	ENST00000586949				0.0944461	0.683795	0	-0.00157844	0.99751	0	0.105333	0.537715	0	0.0072018	0.999232	0	-0.153256	0.818286	0	0.0698344	0.862313	0	-0.0108868	0.994942	0	-0.106911	0.936034	0	-0.0960245	0.999957	0	-0.0626326	0.926825	0	-0.223091	0.717606	0	-0.160458	0.999975	0
A_33_P3383871	NM_020177	NM_020177	56929	fem-1 homolog C	FEM1C	0.0955229	0.591067	0	0.187086	0.171462	0	0.119267	0.342822	0	-0.0659649	0.999232	0	0.27259	0.441887	0	0.243353	0.316592	0	-0.023744	0.981865	0	0.0678188	0.952279	0	0.0915628	0.999957	0	-0.309318	0.438001	0	0.0292364	0.962222	0	0.338555	0.999975	0
A_24_P364087	NM_012139	NM_012139	26297	secretion regulating guanine nucleotide exchange factor	SERGEF	0.197854	0.0155213	1	0.0584081	0.59089	0	0.0543927	0.523488	0	-0.00979645	0.999232	0	-0.0426955	0.930097	0	0.0284398	0.894691	0	0.143462	0.701072	0	0.00401534	0.997649	0	-0.139446	0.999957	0	-0.0382362	0.90993	0	-0.0711353	0.836687	0	-0.0328991	0.999975	0
A_33_P3348234	ENST00000606547	ENST00000606547				-0.0387095	0.783746	0	-0.117895	0.239451	0	-0.0304963	0.78706	0	0.00256869	0.999232	0	-0.16596	0.534545	0	0.040909	0.858906	0	-0.00821322	0.992639	0	-0.0873986	0.889758	0	-0.0791854	0.999957	0	-0.0383403	0.921291	0	-0.206869	0.525574	0	-0.168529	0.999975	0
A_33_P3405911	NR_003255	NR_003255	9383	TSIX transcript, XIST antisense RNA	TSIX	-0.097572	0.494119	0	0.0204271	0.925845	0	0.0793265	0.479314	0	-0.00867276	0.999232	0	0.0210442	0.979935	0	0.0396775	0.889825	0	-0.176899	0.712348	0	-0.0588993	0.951256	0	0.117999	0.999957	0	-0.0483503	0.916987	0	-0.0186333	0.97268	0	0.029717	0.999975	0
A_23_P92642	NM_024668	NM_024668	54882	ankyrin repeat and KH domain containing 1	ANKHD1	-0.234459	0.00238319	-1	-0.202456	0.00393183	-1	-0.133696	0.0411096	-1	-0.0859118	0.999232	0	-0.157449	0.441887	0	-0.175479	0.190325	0	-0.100763	0.74904	0	-0.0687597	0.892397	0	0.0320031	0.999957	0	0.0895667	0.729384	0	0.0180297	0.958858	0	-0.0715371	0.999975	0
A_33_P3405754	ENST00000378223	ENST00000378223				0.147016	0.740233	0	0.204269	0.615318	0	0.169421	0.600765	0	0.271119	0.999232	0	0.150213	0.933986	0	-0.425438	0.471744	0	-0.0224046	0.994363	0	0.0348483	0.989311	0	0.0572529	0.999957	0	0.696557	0.444951	0	0.575651	0.592864	0	-0.120906	0.999975	0
A_23_P165148	NM_006844	NM_006844	10994	ilvB acetolactate synthase like	ILVBL	0.134695	0.168528	0	0.0519936	0.686217	0	0.065879	0.467067	0	0.00703995	0.999232	0	-0.00724393	0.991567	0	0.181893	0.263193	0	0.0688156	0.877061	0	-0.0138854	0.986079	0	-0.082701	0.999957	0	-0.174853	0.52907	0	-0.189136	0.549231	0	-0.0142839	0.999975	0
A_23_P78092	NM_001003927	NM_001003927	2123	ecotropic viral integration site 2A	EVI2A	0.181963	0.582849	0	0.512555	0.030437	1	0.231113	0.322857	0	-0.134025	0.999232	0	0.437971	0.534545	0	0.695902	0.0991832	0	-0.0491494	0.980829	0	0.281443	0.873679	0	0.330592	0.999957	0	-0.829927	0.275854	0	-0.257931	0.795425	0	0.571996	0.999975	0
A_23_P115046	NM_020365	NM_020365	8891	eukaryotic translation initiation factor 2B subunit gamma	EIF2B3	0.0458857	0.642111	0	0.00169888	0.99202	0	-0.0124799	0.895012	0	0.0633231	0.999232	0	0.000467821	0.999411	0	0.0340733	0.843059	0	0.0583656	0.859932	0	0.0141788	0.981815	0	-0.0441868	0.999957	0	0.0292498	0.92088	0	-0.0336055	0.914024	0	-0.0628553	0.999975	0
A_23_P31903	NM_183057	NM_183057	51160	VPS28, ESCRT-I subunit	VPS28	0.00587529	0.962688	0	-0.0669186	0.424761	0	-0.0353208	0.65336	0	-0.0172822	0.999232	0	-0.0789457	0.765227	0	-0.0725982	0.623727	0	0.041196	0.920099	0	-0.0315979	0.961663	0	-0.0727939	0.999957	0	0.0553161	0.830488	0	-0.00634749	0.984907	0	-0.0616636	0.999975	0
A_24_P278367	NM_005736	NM_005736	10121	ARP1 actin related protein 1 homolog A	ACTR1A	-0.10703	0.387244	0	-0.0956159	0.430374	0	-0.126895	0.164671	0	-0.0287631	0.999232	0	-0.0528062	0.930415	0	0.0496998	0.839724	0	0.019865	0.981617	0	0.0312795	0.971345	0	0.0114144	0.999957	0	-0.0784629	0.834347	0	-0.102506	0.80599	0	-0.0240431	0.999975	0
A_24_P915007	NM_052876	NM_052876	112939	nucleus accumbens associated 1	NACC1	0.00317775	0.983736	0	-0.0483474	0.678144	0	-0.160734	0.0217237	-1	0.076064	0.999232	0	-0.197684	0.323786	0	-0.138257	0.371687	0	0.163912	0.685006	0	0.112387	0.850492	0	-0.0515252	0.999957	0	0.214321	0.388738	0	-0.0594275	0.863849	0	-0.273748	0.999975	0
A_33_P3346098	NM_016151	NM_016151	9344	TAO kinase 2	TAOK2	0.0465129	0.822802	0	0.0867103	0.643841	0	-0.103427	0.444612	0	-0.1145	0.999232	0	-0.0491559	0.953853	0	-0.064201	0.844443	0	0.14994	0.795169	0	0.190137	0.850492	0	0.0401974	0.999957	0	-0.0502993	0.928787	0	0.0150451	0.981845	0	0.0653444	0.999975	0
A_23_P122815	NM_001219	NM_001219	813	calumenin	CALU	0.119279	0.187302	0	0.114463	0.181877	0	0.0468408	0.594671	0	-0.00180865	0.999232	0	-0.0451863	0.921915	0	0.15773	0.293813	0	0.0724385	0.848075	0	0.0676221	0.907957	0	-0.00481638	0.999957	0	-0.159539	0.530363	0	-0.202916	0.476953	0	-0.0433777	0.999975	0
A_23_P201287	NM_015074	NM_015074	23095	kinesin family member 1B	KIF1B	-0.436238	0.000959241	-1	-0.37991	0.000691085	-1	-0.194994	0.0670373	0	-0.219179	0.999232	0	-0.103259	0.848046	0	-0.17243	0.475611	0	-0.241245	0.685006	0	-0.184916	0.849447	0	0.0563284	0.999957	0	-0.0467493	0.9273	0	0.0691703	0.89704	0	0.11592	0.999975	0
A_23_P304991	NM_000411	NM_000411	3141	holocarboxylase synthetase	HLCS	0.0497055	0.665984	0	0.00276333	0.988355	0	-0.0351899	0.707826	0	-0.00806422	0.999232	0	-0.10611	0.706554	0	-0.0169679	0.93986	0	0.0848954	0.816245	0	0.0379532	0.960663	0	-0.0469422	0.999957	0	0.00890366	0.980522	0	-0.0891425	0.784111	0	-0.0980462	0.999975	0
A_33_P3415843	THC2667880	THC2667880				0.0479919	0.738902	0	-0.0425483	0.784196	0	0.0576634	0.579317	0	0.164084	0.999232	0	0.203113	0.441887	0	-0.0404631	0.867522	0	-0.00967147	0.991029	0	-0.100212	0.879381	0	-0.0905402	0.999957	0	0.204547	0.495141	0	0.243576	0.472753	0	0.0390294	0.999975	0
A_33_P3246318	NM_014248	NM_014248	9978	ring-box 1	RBX1	0.306179	0.0444226	1	0.282461	0.0555344	0	0.274532	0.0344505	1	0.0339196	0.999232	0	0.202827	0.688534	0	0.0874296	0.803044	0	0.0316473	0.980079	0	0.00792936	0.997151	0	-0.0237179	0.999957	0	-0.0535101	0.932323	0	0.115397	0.856658	0	0.168907	0.999975	0
A_24_P9321	NM_003533	NM_003533	8354	histone cluster 1 H3 family member i	HIST1H3I	0.089951	0.554422	0	0.178441	0.125435	0	0.00783568	0.9638	0	0.0906884	0.999232	0	-0.0611555	0.926163	0	0.00809307	0.981152	0	0.0821154	0.885648	0	0.170605	0.850149	0	0.0884899	0.999957	0	0.0825953	0.846814	0	-0.0692485	0.887033	0	-0.151844	0.999975	0
A_23_P64669	NM_017612	NM_017612	55596	zinc finger CCHC-type containing 8	ZCCHC8	-0.0610012	0.618412	0	-0.13474	0.140439	0	-0.0129007	0.915207	0	-0.118337	0.999232	0	0.0147793	0.982846	0	-0.0649678	0.746854	0	-0.0481005	0.927925	0	-0.12184	0.850492	0	-0.0737392	0.999957	0	-0.0533696	0.878969	0	0.0797471	0.833266	0	0.133117	0.999975	0
A_24_P393372	NM_001100913	NM_001100913	23241	phosphofurin acidic cluster sorting protein 2	PACS2	0.00966305	0.946991	0	-0.0728177	0.476059	0	-0.050322	0.570942	0	0.0228579	0.999232	0	-0.0849588	0.7941	0	-0.0501826	0.795641	0	0.0599851	0.885321	0	-0.0224957	0.975202	0	-0.0824808	0.999957	0	0.0730405	0.810624	0	-0.0347761	0.92452	0	-0.107817	0.999975	0
A_23_P92948	NM_130809	NM_130809	133619	proline rich coiled-coil 1	PRRC1	-0.114044	0.372816	0	-0.114745	0.339031	0	-0.0837786	0.425796	0	-0.0874017	0.999232	0	-0.159387	0.629583	0	-0.0372787	0.892819	0	-0.0302653	0.972776	0	-0.0309661	0.972889	0	-0.000700722	0.999957	0	-0.050123	0.908321	0	-0.122108	0.76964	0	-0.0719855	0.999975	0
A_33_P3327058	NM_001162383	NM_001162383	9181	Rho/Rac guanine nucleotide exchange factor 2	ARHGEF2	-0.129765	0.400514	0	-0.107471	0.489763	0	-0.203557	0.0629535	0	0.167325	0.999232	0	-0.235904	0.505689	0	0.0113773	0.974679	0	0.0737926	0.920025	0	0.0960866	0.917046	0	0.022294	0.999957	0	0.155948	0.716034	0	-0.247282	0.581711	0	-0.403229	0.999975	0
A_33_P3416231	NM_152739	NM_152739	3205	homeobox A9	HOXA9	0.0791928	0.837755	0	0.0571581	0.904666	0	-0.00511067	0.989632	0	0.124467	0.999232	0	0.165097	0.897836	0	-0.445018	0.337367	0	0.0843035	0.965151	0	0.0622688	0.978309	0	-0.0220347	0.999957	0	0.569484	0.451472	0	0.610114	0.483588	0	0.0406297	0.999975	0
A_21_P0000618	NR_033965	NR_033965	440952	EIF1B antisense RNA 1	EIF1B-AS1	-0.000246508	0.998566	0	0.0160504	0.915866	0	-0.0841358	0.240194	0	0.00746009	0.999232	0	0.0552579	0.88546	0	-0.00420503	0.986754	0	0.0838893	0.802021	0	0.100186	0.861776	0	0.0162969	0.999957	0	0.0116651	0.972642	0	0.0594629	0.856658	0	0.0477978	0.999975	0
A_24_P286935	NM_004311	NM_004311	403	ADP ribosylation factor like GTPase 3	ARL3	0.0477863	0.760969	0	-0.0439153	0.79718	0	-0.00234477	0.98929	0	-0.0293394	0.999232	0	0.00332001	0.995856	0	0.101476	0.650301	0	0.0501311	0.941006	0	-0.0415705	0.966705	0	-0.0917016	0.999957	0	-0.130815	0.7154	0	-0.098156	0.824878	0	0.0326594	0.999975	0
A_21_P0011381	NM_001267536	NM_001267536	643707	golgin A6 family-like 4	GOLGA6L4	0.0134725	0.944719	0	-0.11527	0.364634	0	-0.18661	0.0519049	0	-0.0724521	0.999232	0	-0.110831	0.798742	0	0.0282773	0.924648	0	0.200083	0.690317	0	0.0713398	0.936428	0	-0.128743	0.999957	0	-0.100729	0.801205	0	-0.139108	0.744629	0	-0.0383786	0.999975	0
A_23_P144959	NM_004385	NM_004385	1462	versican	VCAN	-0.237246	0.0222814	-1	-0.21832	0.0291898	-1	-0.316787	0.000437258	-1	-0.141659	0.999232	0	-0.233408	0.392957	0	0.00118419	0.997491	0	0.0795406	0.877846	0	0.098467	0.888161	0	0.0189264	0.999957	0	-0.142844	0.67826	0	-0.234592	0.518651	0	-0.0917482	0.999975	0
A_23_P94591	NM_032928	NM_032928	85014	transmembrane protein 141	TMEM141	0.31295	0.0107817	1	0.251299	0.0326818	1	0.135497	0.225606	0	0.00533275	0.999232	0	0.0618832	0.932428	0	0.362911	0.0830498	0	0.177453	0.737285	0	0.115802	0.888161	0	-0.0616515	0.999957	0	-0.357578	0.34099	0	-0.301027	0.478726	0	0.0565504	0.999975	0
A_21_P0012241	TCONS_l2_00017559	TCONS_l2_00017559				-0.0435105	0.693804	0	-0.0931168	0.267941	0	-0.021211	0.825959	0	0.0238295	0.999232	0	-0.0931777	0.733979	0	-0.193541	0.149613	0	-0.0222995	0.972602	0	-0.0719057	0.890089	0	-0.0496062	0.999957	0	0.217371	0.354288	0	0.100364	0.732243	0	-0.117007	0.999975	0
A_23_P218086	NM_001143819	NM_001143819	53373	two pore segment channel 1	TPCN1	-0.0903033	0.354251	0	-0.218065	0.00393183	-1	-0.240295	0.000726244	-1	-0.0239498	0.999232	0	-0.164453	0.459884	0	-0.11595	0.470821	0	0.149992	0.688867	0	0.0222301	0.974936	0	-0.127762	0.999957	0	0.0920003	0.744574	0	-0.0485031	0.889037	0	-0.140503	0.999975	0
A_21_P0013005	NM_001278506	NM_001278506	4682	nucleotide binding protein 1	NUBP1	-0.118455	0.211964	0	-0.0321534	0.819958	0	0.0523429	0.562159	0	-0.00517419	0.999232	0	-0.100838	0.743891	0	0.151825	0.340197	0	-0.170798	0.685006	0	-0.0844963	0.884924	0	0.0863012	0.999957	0	-0.156999	0.555717	0	-0.252663	0.387881	0	-0.0956634	0.999975	0
A_32_P84369	NR_038353	NR_038353	653316	family with sequence similarity 153 member C	FAM153C	-0.0362879	0.835467	0	-0.0429563	0.818729	0	-0.074109	0.528781	0	0.0190876	0.999232	0	-0.0228755	0.979788	0	0.0590201	0.827138	0	0.037821	0.965151	0	0.0311526	0.974355	0	-0.00666841	0.999957	0	-0.0399324	0.932489	0	-0.0818956	0.864228	0	-0.0419631	0.999975	0
A_33_P3360886	THC2642603	THC2642603				0.0739604	0.907117	0	0.0909996	0.900037	0	0.314857	0.403665	0	0.235978	0.999232	0	0.142965	0.952026	0	-1.12087	0.0892089	0	-0.240896	0.909813	0	-0.223857	0.945001	0	0.0170391	0.999957	0	1.35685	0.260422	0	1.26383	0.337923	0	-0.0930137	0.999975	0
A_24_P372048	NM_006555	NM_006555	10652	YKT6 v-SNARE homolog	YKT6	-0.0978533	0.505928	0	-0.0199554	0.929165	0	0.0800016	0.489792	0	-0.0340457	0.999232	0	-0.0421385	0.952717	0	0.308786	0.113281	0	-0.177855	0.714513	0	-0.0999569	0.89732	0	0.0778979	0.999957	0	-0.342832	0.323523	0	-0.350924	0.371031	0	-0.00809287	0.999975	0
A_23_P16538	NM_006532	NM_006532	8178	elongation factor for RNA polymerase II	ELL	-0.202001	0.0442965	-1	-0.173308	0.077456	0	-0.134158	0.126054	0	-0.0305851	0.999232	0	-0.0288301	0.966325	0	0.00400267	0.990491	0	-0.0678429	0.893957	0	-0.0391492	0.966705	0	0.0286936	0.999957	0	-0.0345878	0.93354	0	-0.0328328	0.941325	0	0.00175502	0.999975	0
A_21_P0014385	ENST00000591252	ENST00000591252				0.0448687	0.747184	0	-0.10187	0.335864	0	-0.120785	0.14828	0	0.0387851	0.999232	0	-0.0966776	0.791711	0	-0.122192	0.515254	0	0.165654	0.699037	0	0.0189146	0.981773	0	-0.146739	0.999957	0	0.160977	0.588371	0	0.0255144	0.952509	0	-0.135463	0.999975	0
A_23_P101707	NM_005817	NM_005817	10226	perilipin 3	PLIN3	-0.100863	0.526354	0	-0.14938	0.258531	0	-0.190438	0.0728085	0	-0.00646103	0.999232	0	-0.236316	0.483872	0	-0.122759	0.631958	0	0.0895751	0.883661	0	0.0410579	0.968684	0	-0.0485172	0.999957	0	0.116298	0.789484	0	-0.113557	0.82486	0	-0.229855	0.999975	0
A_23_P49816	NM_018404	NM_018404	55803	ArfGAP with dual PH domains 2	ADAP2	0.0165516	0.932799	0	0.0506847	0.773111	0	-0.231248	0.0158882	-1	0.0548455	0.999232	0	-0.238077	0.430215	0	-0.122777	0.595011	0	0.247799	0.685006	0	0.281932	0.827784	0	0.0341331	0.999957	0	0.177623	0.622081	0	-0.115299	0.800462	0	-0.292922	0.999975	0
A_23_P122532	NM_021184	NM_021184	57827	chromosome 6 open reading frame 47	C6orf47	0.104757	0.261862	0	0.0137143	0.932554	0	-0.0663499	0.411774	0	0.100236	0.999232	0	-0.00281087	0.995497	0	0.0505632	0.788969	0	0.171107	0.685006	0	0.0800642	0.885246	0	-0.0910431	0.999957	0	0.0496726	0.877003	0	-0.0533741	0.878514	0	-0.103047	0.999975	0
A_33_P3229863	NR_040082	NR_040082	100128714	long intergenic non-protein coding RNA 2346	LINC02346	-0.0751365	0.810299	0	0.123519	0.668522	0	0.0473484	0.857777	0	0.0460037	0.999232	0	0.0551872	0.969959	0	-0.219811	0.605491	0	-0.122485	0.916568	0	0.0761708	0.968008	0	0.198656	0.999957	0	0.265815	0.698041	0	0.274998	0.720918	0	0.0091835	0.999975	0
A_21_P0003704	TCONS_00008387	TCONS_00008387				-0.109309	0.543747	0	-0.107584	0.533859	0	-0.243349	0.0387349	-1	0.0540444	0.999232	0	0.00827327	0.992645	0	0.142962	0.615574	0	0.13404	0.829911	0	0.135765	0.883777	0	0.00172498	0.999957	0	-0.0889175	0.864262	0	-0.134689	0.81025	0	-0.0457711	0.999975	0
A_33_P3239287	NM_001005271	NM_001005271	1107	chromodomain helicase DNA binding protein 3	CHD3	-0.0331563	0.845548	0	-0.147897	0.196765	0	-0.104147	0.312364	0	-0.207555	0.999232	0	-0.151276	0.670331	0	-0.0549879	0.83379	0	0.0709909	0.903935	0	-0.0437495	0.966286	0	-0.11474	0.999957	0	-0.152568	0.670715	0	-0.096288	0.834973	0	0.0562795	0.999975	0
A_33_P3226129	THC2633659	THC2633659				0.0582666	0.652502	0	0.00149036	0.995561	0	-0.0298386	0.789068	0	-0.0115028	0.999232	0	-0.0245339	0.970994	0	-0.09763	0.613172	0	0.0881052	0.837464	0	0.031329	0.968684	0	-0.0567762	0.999957	0	0.0861272	0.794799	0	0.0730961	0.852578	0	-0.0130311	0.999975	0
A_33_P3235876	ENST00000390632	ENST00000390632				-0.0593102	0.773435	0	-0.0585561	0.791478	0	-0.0603961	0.70354	0	-0.276541	0.999232	0	-0.167564	0.73245	0	-0.210276	0.431449	0	0.00108596	0.998935	0	0.00184004	0.999385	0	0.000754075	0.999957	0	-0.0662651	0.907388	0	0.0427122	0.94538	0	0.108977	0.999975	0
A_33_P3356004	NR_027287	NR_027287	100113386	UCKL1 antisense RNA 1	UCKL1-AS1	0.00589014	0.974607	0	0.0208884	0.916868	0	-0.00494378	0.974337	0	0.116445	0.999232	0	-0.0508573	0.933997	0	-0.0607451	0.797518	0	0.0108339	0.989415	0	0.0258322	0.978128	0	0.0149983	0.999957	0	0.17719	0.582936	0	0.0098878	0.984652	0	-0.167302	0.999975	0
A_32_P54544	NM_001762	NM_001762	908	chaperonin containing TCP1 subunit 6A	CCT6A	0.00121904	0.995072	0	0.0244319	0.877591	0	0.0618657	0.487514	0	-0.0378542	0.999232	0	-0.067007	0.871133	0	0.172031	0.279331	0	-0.0606467	0.892028	0	-0.0374338	0.965882	0	0.0232129	0.999957	0	-0.209885	0.430872	0	-0.239038	0.421675	0	-0.0291528	0.999975	0
A_21_P0010879	NR_026566	NR_026566				-0.0866063	0.533783	0	-0.0509567	0.755496	0	-0.113015	0.250671	0	-0.0707272	0.999232	0	-0.194816	0.516193	0	0.10302	0.646547	0	0.0264087	0.977229	0	0.0620582	0.944936	0	0.0356495	0.999957	0	-0.173748	0.609514	0	-0.297837	0.412342	0	-0.124089	0.999975	0
A_33_P3381483	NM_001253798	NM_001253798	55422	zinc finger protein 331	ZNF331	0.0107645	0.947696	0	-0.0622185	0.627712	0	0.0910061	0.303709	0	-0.0729187	0.999232	0	-0.108005	0.753676	0	-0.0711379	0.734292	0	-0.0802416	0.854443	0	-0.153225	0.836911	0	-0.072983	0.999957	0	-0.0017807	0.997199	0	-0.0368671	0.929936	0	-0.0350864	0.999975	0
A_23_P162279	NM_018318	NM_018318	55297	coiled-coil domain containing 91	CCDC91	0.0117469	0.957645	0	0.0311507	0.894328	0	0.167848	0.131455	0	-0.0971356	0.999232	0	0.0252409	0.979788	0	0.0505228	0.871513	0	-0.156101	0.769585	0	-0.136697	0.87537	0	0.0194038	0.999957	0	-0.147658	0.731071	0	-0.0252819	0.966731	0	0.122377	0.999975	0
A_33_P3253501	NM_001024599	NM_001024599	440689	histone cluster 2 H2B family member f	HIST2H2BF	0.0491526	0.767752	0	0.0433283	0.81336	0	0.027567	0.847129	0	0.0950729	0.999232	0	-0.0936066	0.848541	0	0.0193969	0.951848	0	0.0215856	0.981617	0	0.0157613	0.98756	0	-0.00582431	0.999957	0	0.075676	0.857682	0	-0.113004	0.805182	0	-0.188679	0.999975	0
A_23_P114414	NM_001031855	NM_001031855	79836	LON peptidase N-terminal domain and ring finger 3	LONRF3	-0.0228977	0.875247	0	0.0442825	0.750724	0	-0.0405292	0.698182	0	0.13616	0.999232	0	0.0255446	0.967688	0	0.00121806	0.997491	0	0.0176316	0.981617	0	0.0848117	0.890089	0	0.0671802	0.999957	0	0.134942	0.650097	0	0.0243265	0.953785	0	-0.110616	0.999975	0
A_33_P3245620	A_33_P3245620	A_33_P3245620				0.16989	0.442756	0	0.262518	0.146558	0	0.118737	0.512778	0	0.395731	0.999232	0	0.373762	0.430215	0	-0.0329469	0.947071	0	0.0511535	0.972402	0	0.143782	0.908064	0	0.0926283	0.999957	0	0.428678	0.424661	0	0.406709	0.5076	0	-0.0219689	0.999975	0
A_33_P3272260	NM_001122962	NM_001122962	284759	signal regulatory protein beta 2	SIRPB2	-0.056708	0.692522	0	-0.0902775	0.456246	0	-0.0308775	0.799458	0	0.0657399	0.999232	0	-0.0486299	0.935987	0	-0.110799	0.592147	0	-0.0258305	0.97629	0	-0.0594	0.944629	0	-0.0335695	0.999957	0	0.176539	0.576472	0	0.0621691	0.885286	0	-0.11437	0.999975	0
A_24_P67189	AK097400	AK097400				0.0545452	0.743116	0	0.0330598	0.86888	0	0.00709734	0.967056	0	0.0708217	0.999232	0	-0.0165081	0.986276	0	-0.204229	0.32981	0	0.0474479	0.951224	0	0.0259625	0.979845	0	-0.0214854	0.999957	0	0.27505	0.424372	0	0.187721	0.64541	0	-0.0873298	0.999975	0
A_23_P328034	NM_153269	NM_153269	140680	chromosome 20 open reading frame 96	C20orf96	0.0275636	0.839354	0	-0.0595126	0.615318	0	-0.0637101	0.47212	0	0.00392869	0.999232	0	-0.15143	0.546207	0	0.0337177	0.879354	0	0.0912737	0.813703	0	0.00419754	0.997685	0	-0.0870762	0.999957	0	-0.029789	0.934832	0	-0.185148	0.548802	0	-0.155359	0.999975	0
A_33_P3367565	XM_005251815	XM_005251815	23048	formin binding protein 1	FNBP1	-0.128212	0.265076	0	-0.185081	0.0617777	0	-0.159001	0.0691377	0	-0.132331	0.999232	0	-0.183417	0.521526	0	-0.304316	0.0781425	0	0.0307888	0.969952	0	-0.0260796	0.977196	0	-0.0568684	0.999957	0	0.171985	0.590369	0	0.120899	0.758174	0	-0.0510859	0.999975	0
A_33_P3291329	A_33_P3291329	A_33_P3291329				0.151833	0.677263	0	0.0878119	0.840898	0	0.15867	0.561688	0	0.193548	0.999232	0	0.145171	0.920377	0	-0.685287	0.124171	0	-0.00683648	0.997941	0	-0.0708577	0.974567	0	-0.0640213	0.999957	0	0.878835	0.268743	0	0.830458	0.352928	0	-0.0483769	0.999975	0
A_23_P107801	NM_032207	NM_032207	84167	chromosome 19 open reading frame 44	C19orf44	0.141932	0.266924	0	0.0452091	0.803679	0	-0.0937852	0.391022	0	0.0106576	0.999232	0	-0.0120252	0.989907	0	-0.0071493	0.98338	0	0.235717	0.685006	0	0.138994	0.865217	0	-0.0967225	0.999957	0	0.0178069	0.971281	0	-0.00487594	0.992988	0	-0.0226828	0.999975	0
A_23_P77328	NM_005258	NM_005258	2644	GTP cyclohydrolase I feedback regulator	GCHFR	0.198489	0.0497449	1	0.213406	0.0248554	1	0.149539	0.0843785	0	0.0794662	0.999232	0	0.0530588	0.926607	0	0.465706	0.0071769	1	0.0489507	0.936028	0	0.0638669	0.936497	0	0.0149163	0.999957	0	-0.38624	0.239568	0	-0.412647	0.266555	0	-0.0264074	0.999975	0
A_32_P96807	NM_172071	NM_172071	149041	ring finger and CCCH-type domains 1	RC3H1	-0.146598	0.322205	0	-0.0761234	0.668742	0	0.0753881	0.574337	0	-0.0998418	0.999232	0	0.229769	0.521526	0	-0.00384845	0.992971	0	-0.221986	0.701072	0	-0.151512	0.867538	0	0.0704747	0.999957	0	-0.0959934	0.836953	0	0.233618	0.605737	0	0.329611	0.999975	0
A_33_P3389394	NR_002312	NR_002312	85495	ribonuclease P RNA component H1	RPPH1	0.331786	0.095549	0	0.16043	0.496158	0	-0.0641223	0.779589	0	0.432108	0.999232	0	0.378863	0.467473	0	0.0591104	0.90645	0	0.395908	0.685006	0	0.224552	0.872944	0	-0.171356	0.999957	0	0.372998	0.528724	0	0.319753	0.644084	0	-0.0532453	0.999975	0
A_33_P3306545	NM_001172705	NM_001172705	1982	eukaryotic translation initiation factor 4 gamma 2	EIF4G2	-0.154702	0.265196	0	-0.0576276	0.759318	0	0.00120471	0.994622	0	-0.122063	0.999232	0	0.0624391	0.93091	0	0.263496	0.225618	0	-0.155906	0.760541	0	-0.0588323	0.957986	0	0.0970741	0.999957	0	-0.385559	0.300646	0	-0.201057	0.646638	0	0.184502	0.999975	0
A_23_P102842	NM_021100	NM_021100	9054	NFS1, cysteine desulfurase	NFS1	0.0145941	0.895956	0	-0.115651	0.0865712	0	-0.0107166	0.905983	0	-0.052149	0.999232	0	-0.121115	0.533481	0	0.0178862	0.921732	0	0.0253107	0.959846	0	-0.104935	0.84917	0	-0.130246	0.999957	0	-0.0700352	0.769442	0	-0.139001	0.562546	0	-0.068966	0.999975	0
A_33_P3230264	NM_001164617	NM_001164617	2719	glypican 3	GPC3	0.114658	0.623199	0	0.0392678	0.903544	0	0.136976	0.413168	0	0.0280376	0.999232	0	0.0912683	0.925251	0	-0.459262	0.114917	0	-0.0223181	0.987152	0	-0.0977082	0.946046	0	-0.0753901	0.999957	0	0.487299	0.347565	0	0.55053	0.350375	0	0.0632306	0.999975	0
A_23_P29939	NM_007308	NM_007308	6622	synuclein alpha	SNCA	-0.185012	0.62927	0	-0.267753	0.412753	0	0.375234	0.125275	0	-0.0332261	0.999232	0	0.217109	0.863875	0	-0.482594	0.352936	0	-0.560245	0.685006	0	-0.642987	0.827784	0	-0.0827414	0.999957	0	0.449368	0.612772	0	0.699703	0.465177	0	0.250335	0.999975	0
A_23_P89249	NM_001005862	NM_001005862	2064	erb-b2 receptor tyrosine kinase 2	ERBB2	0.0504144	0.715476	0	0.116737	0.2565	0	-0.0636755	0.516659	0	0.0191142	0.999232	0	-0.0090026	0.990946	0	-0.0128207	0.962415	0	0.11409	0.775809	0	0.180412	0.828696	0	0.0663221	0.999957	0	0.0319349	0.935363	0	0.00381809	0.993638	0	-0.0281168	0.999975	0
A_23_P107116	NM_007148	NM_007148	7732	ring finger protein 112	RNF112	-0.00143538	0.989241	0	-0.0309871	0.671432	0	-0.0724635	0.110866	0	0.0436555	0.999232	0	-0.0100272	0.979788	0	0.0115795	0.935922	0	0.0710281	0.746686	0	0.0414764	0.90974	0	-0.0295517	0.999957	0	0.0320759	0.872325	0	-0.0216067	0.924203	0	-0.0536826	0.999975	0
A_21_P0000189	NM_001938	NM_001938	1810	down-regulator of transcription 1	DR1	0.00346639	0.992846	0	0.0362655	0.91402	0	0.201668	0.198283	0	-0.185652	0.999232	0	0.114214	0.898595	0	-0.0155859	0.974679	0	-0.198201	0.787891	0	-0.165402	0.887155	0	0.0327991	0.999957	0	-0.170066	0.780234	0	0.1298	0.858583	0	0.299866	0.999975	0
A_23_P324994	NM_018846	NM_018846	55975	kelch like family member 7	KLHL7	-0.0775972	0.556839	0	-0.0287346	0.871146	0	-0.0387639	0.738646	0	-0.0228814	0.999232	0	0.0446059	0.940961	0	0.0850049	0.69392	0	-0.0388333	0.956283	0	0.0100294	0.990807	0	0.0488626	0.999957	0	-0.107886	0.755375	0	-0.040399	0.926681	0	0.0674873	0.999975	0
A_23_P255153	NM_016024	NM_016024	51634	RNA binding motif protein, X-linked 2	RBMX2	-0.036808	0.817529	0	-0.0139046	0.948596	0	-0.0110637	0.941468	0	-0.0463545	0.999232	0	0.214056	0.449948	0	0.085251	0.70943	0	-0.0257443	0.978061	0	-0.00284088	0.999185	0	0.0229034	0.999957	0	-0.131605	0.709233	0	0.128805	0.749213	0	0.260411	0.999975	0
A_23_P121141	NM_014065	NM_014065	28990	asteroid homolog 1	ASTE1	0.066489	0.600721	0	0.0215117	0.904577	0	0.123539	0.136794	0	-0.00936792	0.999232	0	0.113784	0.732123	0	0.182328	0.28544	0	-0.0570496	0.91437	0	-0.102027	0.87537	0	-0.0449773	0.999957	0	-0.191696	0.504257	0	-0.0685442	0.861882	0	0.123152	0.999975	0
A_23_P161424	NM_032812	NM_032812	84898	plexin domain containing 2	PLXDC2	-0.257011	0.0215211	-1	-0.189762	0.0901833	0	-0.214933	0.0258651	-1	-0.0695733	0.999232	0	-0.117381	0.786186	0	-0.158222	0.474026	0	-0.0420778	0.959846	0	0.0251708	0.980712	0	0.0672486	0.999957	0	0.0886487	0.829144	0	0.0408409	0.935121	0	-0.0478079	0.999975	0
A_33_P3346333	A_33_P3346333	A_33_P3346333				-0.0772854	0.501882	0	-0.0980604	0.324633	0	-0.0853869	0.307746	0	-0.0674699	0.999232	0	-0.172557	0.481873	0	-0.2481	0.103772	0	0.00810151	0.992487	0	-0.0126735	0.987399	0	-0.020775	0.999957	0	0.18063	0.507732	0	0.0755429	0.839506	0	-0.105087	0.999975	0
A_21_P0008624	TCONS_00023378	TCONS_00023378				0.162065	0.772151	0	0.147481	0.810516	0	0.216268	0.590661	0	0.198175	0.999232	0	0.16264	0.943877	0	-0.854969	0.199188	0	-0.0542029	0.984807	0	-0.0687867	0.982814	0	-0.0145838	0.999957	0	1.05314	0.355211	0	1.01761	0.427713	0	-0.0355348	0.999975	0
A_23_P33894	NM_201222	NM_201222	10916	MAGE family member D2	MAGED2	-0.166696	0.136132	0	-0.0395207	0.819185	0	0.00255647	0.988373	0	-0.0175651	0.999232	0	-0.17575	0.562814	0	0.122076	0.564486	0	-0.169253	0.712348	0	-0.0420772	0.966283	0	0.127175	0.999957	0	-0.139641	0.68773	0	-0.297826	0.401939	0	-0.158185	0.999975	0
A_23_P114826	NM_031280	NM_031280	64960	mitochondrial ribosomal protein S15	MRPS15	0.125727	0.115977	0	0.166666	0.0207715	1	0.119425	0.0691377	0	0.0936444	0.999232	0	-0.0186304	0.973661	0	0.322588	0.0137373	1	0.0063013	0.993312	0	0.0472409	0.939252	0	0.0409396	0.999957	0	-0.228944	0.321918	0	-0.341219	0.247966	0	-0.112275	0.999975	0
A_23_P117582	NM_130469	NM_130469	122953	Jun dimerization protein 2	JDP2	-0.0478933	0.738438	0	-0.133428	0.190022	0	-0.0746858	0.441409	0	0.0256799	0.999232	0	-0.138765	0.654398	0	-0.0674496	0.760275	0	0.0267925	0.973765	0	-0.0587424	0.942982	0	-0.0855349	0.999957	0	0.0931295	0.788308	0	-0.0713154	0.861844	0	-0.164445	0.999975	0
A_23_P78664	NM_005804	NM_005804	10212	DExD-box helicase 39A	DDX39A	-0.0453566	0.736902	0	0.0278974	0.862225	0	-0.0840876	0.335746	0	-0.160232	0.999232	0	-0.171454	0.504387	0	0.135457	0.448217	0	0.038731	0.950683	0	0.111985	0.867538	0	0.073254	0.999957	0	-0.295689	0.291686	0	-0.306911	0.336969	0	-0.0112222	0.999975	0
A_33_P3362631	NM_021927	NM_021927	60558	GUF1 homolog, GTPase	GUF1	0.0577494	0.629824	0	-0.00931012	0.960441	0	0.0215498	0.845194	0	-0.0272137	0.999232	0	-0.111684	0.709565	0	0.0359934	0.86691	0	0.0361996	0.951471	0	-0.0308599	0.968684	0	-0.0670595	0.999957	0	-0.0632071	0.844421	0	-0.147677	0.637516	0	-0.08447	0.999975	0
A_23_P104798	NM_001562	NM_001562	3606	interleukin 18	IL18	0.0512975	0.51413	0	-0.0534787	0.467588	0	0.0197013	0.787247	0	0.000114729	0.999672	0	-0.0460579	0.873547	0	0.0963884	0.404248	0	0.0315962	0.933281	0	-0.07318	0.867538	0	-0.104776	0.999957	0	-0.0962737	0.621911	0	-0.142446	0.499367	0	-0.0461726	0.999975	0
A_21_P0000064	NM_006665	NM_006665	10855	heparanase	HPSE	-0.0342396	0.839084	0	0.096482	0.464234	0	-0.0706992	0.532261	0	0.0488053	0.999232	0	0.0276745	0.97257	0	0.235061	0.226314	0	0.0364596	0.965151	0	0.167181	0.84917	0	0.130722	0.999957	0	-0.186256	0.588434	0	-0.207387	0.59298	0	-0.0211308	0.999975	0
A_23_P64860	NM_003006	NM_003006	6404	selectin P ligand	SELPLG	-0.286105	0.0107817	-1	-0.205918	0.0598186	0	-0.1326	0.188442	0	-0.069863	0.999232	0	-0.110731	0.800207	0	-0.00904466	0.97766	0	-0.153505	0.746686	0	-0.073318	0.935756	0	0.0801865	0.999957	0	-0.0608183	0.891219	0	-0.101687	0.828074	0	-0.0408684	0.999975	0
A_23_P97064	NM_018438	NM_018438	26270	F-box protein 6	FBXO6	-0.1112	0.679436	0	0.276064	0.161119	0	0.00880588	0.975511	0	-0.0267614	0.999232	0	-0.232123	0.729773	0	0.0513113	0.919578	0	-0.120006	0.908556	0	0.267259	0.850492	0	0.387265	0.999957	0	-0.0780727	0.921218	0	-0.283435	0.686959	0	-0.205362	0.999975	0
A_23_P256205	NM_014945	NM_014945	22885	actin binding LIM protein family member 3	ABLIM3	-0.0945503	0.499958	0	-0.0873722	0.521294	0	-0.0435858	0.728874	0	0.0853142	0.999232	0	-0.108942	0.797423	0	-0.322198	0.0829908	0	-0.0509645	0.942745	0	-0.0437864	0.966283	0	0.00717815	0.999957	0	0.407512	0.248244	0	0.213256	0.581005	0	-0.194256	0.999975	0
A_23_P72068	NM_001500	NM_001500	2762	GDP-mannose 4,6-dehydratase	GMDS	-0.0872858	0.45517	0	-0.0947924	0.37151	0	0.0402928	0.704256	0	0.0823979	0.999232	0	-0.142139	0.618134	0	0.252652	0.110524	0	-0.127579	0.746686	0	-0.135085	0.850492	0	-0.00750668	0.999957	0	-0.170254	0.554034	0	-0.394791	0.266555	0	-0.224537	0.999975	0
A_33_P3222045	NM_201400	NM_201400	196483	eukaryotic elongation factor 2 lysine methyltransferase	EEF2KMT	0.0543529	0.678287	0	0.0509858	0.70779	0	0.0807704	0.367331	0	-0.0312855	0.999232	0	-0.0856355	0.825428	0	0.0272126	0.912247	0	-0.0264175	0.972776	0	-0.0297846	0.969487	0	-0.00336707	0.999957	0	-0.0584981	0.870301	0	-0.112848	0.753376	0	-0.05435	0.999975	0
A_23_P92093	NM_001407	NM_001407	1951	cadherin EGF LAG seven-pass G-type receptor 3	CELSR3	-0.0428722	0.715257	0	-0.00584439	0.975191	0	-0.0408899	0.648203	0	0.122332	0.999232	0	-0.0814477	0.796673	0	0.0877602	0.599599	0	-0.00198227	0.997941	0	0.0350455	0.964354	0	0.0370278	0.999957	0	0.0345715	0.918165	0	-0.169208	0.552376	0	-0.203779	0.999975	0
A_33_P3354181	NM_020122	NM_020122	56888	potassium channel modulatory factor 1	KCMF1	-0.00385992	0.979725	0	-0.0367193	0.775892	0	0.0354203	0.707045	0	-0.0292048	0.999232	0	-0.0524593	0.901979	0	0.0184441	0.935631	0	-0.0392803	0.939424	0	-0.0721397	0.897213	0	-0.0328594	0.999957	0	-0.0476489	0.883857	0	-0.0709034	0.836687	0	-0.0232545	0.999975	0
A_23_P37441	NM_004048	NM_004048	567	beta-2-microglobulin	B2M	0.041346	0.910689	0	0.274705	0.246114	0	0.333818	0.0814613	0	-0.0987571	0.999232	0	0.152092	0.891281	0	0.76626	0.0419731	1	-0.292472	0.74904	0	-0.0591133	0.975202	0	0.233359	0.999957	0	-0.865017	0.229424	0	-0.614168	0.413328	0	0.250849	0.999975	0
A_23_P106241	NM_004239	NM_004239	9321	thyroid hormone receptor interactor 11	TRIP11	0.0349608	0.727982	0	-0.0152796	0.906932	0	-0.0083888	0.930887	0	0.0299556	0.999232	0	0.0281919	0.946415	0	0.0155698	0.93485	0	0.0433496	0.907309	0	-0.00689085	0.990809	0	-0.0502404	0.999957	0	0.0143859	0.963374	0	0.0126221	0.969657	0	-0.00176375	0.999975	0
A_23_P7941	NM_015950	NM_015950	51069	mitochondrial ribosomal protein L2	MRPL2	0.0270034	0.88688	0	0.098942	0.496055	0	-0.0374257	0.792154	0	-0.024963	0.999232	0	-0.156511	0.694005	0	-0.0641472	0.818489	0	0.0644291	0.925645	0	0.136368	0.873679	0	0.0719386	0.999957	0	0.0391842	0.936042	0	-0.0923642	0.853642	0	-0.131548	0.999975	0
A_23_P106661	NM_052999	NM_052999	113540	CKLF like MARVEL transmembrane domain containing 1	CMTM1	0.0390244	0.770019	0	-0.0580766	0.637169	0	-0.116169	0.144008	0	0.0968182	0.999232	0	-0.0584393	0.899265	0	-0.0345969	0.8785	0	0.155194	0.703772	0	0.0580927	0.936034	0	-0.097101	0.999957	0	0.131415	0.653204	0	-0.0238424	0.953905	0	-0.155257	0.999975	0
A_33_P3369258	NM_001171888	NM_001171888	26127	FGFR1 oncogene partner 2	FGFR1OP2	0.0220096	0.928784	0	0.0652041	0.7714	0	0.110719	0.436381	0	0.108965	0.999232	0	0.122367	0.843117	0	0.00748434	0.98755	0	-0.0887092	0.91157	0	-0.0455146	0.969487	0	0.0431946	0.999957	0	0.101481	0.850318	0	0.114883	0.850364	0	0.0134015	0.999975	0
A_23_P37910	NM_002746	NM_002746	5595	mitogen-activated protein kinase 3	MAPK3	-0.102762	0.419398	0	-0.0633319	0.660723	0	-0.04536	0.701404	0	-0.0082013	0.999232	0	-0.035573	0.956054	0	-0.0789393	0.729856	0	-0.0574018	0.924416	0	-0.0179719	0.982814	0	0.03943	0.999957	0	0.070738	0.854454	0	0.0433664	0.924006	0	-0.0273717	0.999975	0
A_33_P3388501	NM_003465	NM_003465	1118	chitinase 1	CHIT1	0.0114428	0.961033	0	0.12758	0.414195	0	-0.147701	0.222826	0	0.128553	0.999232	0	-0.0328735	0.973115	0	-0.241009	0.3266	0	0.159144	0.775205	0	0.275282	0.827784	0	0.116138	0.999957	0	0.369562	0.357585	0	0.208135	0.668291	0	-0.161426	0.999975	0
A_33_P3353343	NM_016333	NM_016333	23524	serine/arginine repetitive matrix 2	SRRM2	-0.077493	0.693132	0	-0.107266	0.538234	0	-0.367094	0.00184089	-1	-0.0306906	0.999232	0	-0.194828	0.657857	0	-0.168338	0.543558	0	0.289601	0.685006	0	0.259827	0.828696	0	-0.0297732	0.999957	0	0.137647	0.775392	0	-0.0264904	0.968597	0	-0.164138	0.999975	0
A_33_P3402010	AK024445	AK024445				-0.0323209	0.918188	0	0.143238	0.540989	0	-0.0973234	0.630899	0	0.144529	0.999232	0	0.151723	0.850294	0	-0.120573	0.774985	0	0.0650025	0.962445	0	0.240562	0.858639	0	0.175559	0.999957	0	0.265103	0.661203	0	0.272297	0.689494	0	0.00719386	0.999975	0
A_33_P3212640	NM_203458	NM_203458	388677	notch 2 N-terminal like	NOTCH2NL	-0.0355491	0.858646	0	0.0498147	0.80876	0	-0.1037	0.400797	0	-0.166674	0.999232	0	-0.100221	0.858893	0	-0.0959063	0.731916	0	0.0681508	0.927458	0	0.153515	0.867538	0	0.0853638	0.999957	0	-0.0707679	0.887778	0	-0.00431503	0.994334	0	0.0664529	0.999975	0
A_23_P24375	NM_017670	NM_017670	55611	OTU deubiquitinase, ubiquitin aldehyde binding 1	OTUB1	-0.0387256	0.835289	0	0.107367	0.462317	0	0.0301083	0.845007	0	0.0102301	0.999232	0	-0.0584346	0.936153	0	0.25924	0.229553	0	-0.0688339	0.922701	0	0.077259	0.936497	0	0.146093	0.999957	0	-0.24901	0.500608	0	-0.317675	0.443359	0	-0.0686647	0.999975	0
A_21_P0014672	ENST00000527274	ENST00000527274				-0.00306931	0.989698	0	0.0915124	0.528364	0	-0.0122631	0.940984	0	-0.0707017	0.999232	0	-0.0161834	0.986816	0	-0.113235	0.640113	0	0.00919378	0.993665	0	0.103775	0.893453	0	0.0945817	0.999957	0	0.0425328	0.928864	0	0.0970511	0.840328	0	0.0545184	0.999975	0
A_21_P0014730	ENST00000433446	ENST00000433446				0.122968	0.197514	0	-0.0100826	0.955609	0	-0.0227694	0.834376	0	0.0904511	0.999232	0	-0.0886425	0.792946	0	0.0750629	0.687233	0	0.145737	0.708257	0	0.0126868	0.986859	0	-0.13305	0.999957	0	0.0153882	0.968593	0	-0.163705	0.594101	0	-0.179094	0.999975	0
A_32_P145153	NM_000993	NM_000993	6160	ribosomal protein L31	RPL31	0.510242	0.157956	0	0.616699	0.0601124	0	0.330474	0.291596	0	-0.125742	0.999232	0	0.403103	0.734302	0	0.730253	0.220365	0	0.179768	0.927925	0	0.286226	0.90086	0	0.106458	0.999957	0	-0.855994	0.399582	0	-0.32715	0.812629	0	0.528844	0.999975	0
A_24_P187651	NM_001042432	NM_001042432	1201	CLN3, battenin	CLN3	-0.0769047	0.64846	0	-0.0261872	0.910533	0	0.0220037	0.891709	0	-0.0224083	0.999232	0	-0.0764481	0.904506	0	0.073838	0.791222	0	-0.0989084	0.860827	0	-0.0481909	0.966417	0	0.0507175	0.999957	0	-0.0962464	0.828908	0	-0.150286	0.746288	0	-0.0540398	0.999975	0
A_23_P139297	NM_017583	NM_017583	54765	tripartite motif containing 44	TRIM44	-0.130439	0.312518	0	-0.0631747	0.690929	0	-0.0360764	0.786511	0	-0.141321	0.999232	0	-0.0914711	0.848541	0	-0.0402956	0.887449	0	-0.094363	0.854017	0	-0.0270982	0.978506	0	0.0672648	0.999957	0	-0.101026	0.79896	0	-0.0511755	0.91673	0	0.0498502	0.999975	0
A_23_P114656	NM_004964	NM_004964	3065	histone deacetylase 1	HDAC1	-0.0521865	0.612226	0	-0.087988	0.285854	0	-0.0222501	0.807731	0	-0.124765	0.999232	0	-0.0963961	0.712569	0	-0.0467583	0.787604	0	-0.0299364	0.953819	0	-0.0657379	0.899229	0	-0.0358015	0.999957	0	-0.0780071	0.768092	0	-0.0496378	0.877098	0	0.0283693	0.999975	0
A_23_P120062	NM_003203	NM_003203	6936	GC-rich sequence DNA-binding factor 2	GCFC2	0.0887885	0.339681	0	0.0686155	0.474641	0	0.116061	0.0908591	0	-0.0558425	0.999232	0	0.0437789	0.921075	0	0.0790996	0.631584	0	-0.0272724	0.963727	0	-0.0474453	0.942982	0	-0.0201729	0.999957	0	-0.134942	0.587926	0	-0.0353208	0.919894	0	0.0996214	0.999975	0
A_23_P422071	NM_003782	NM_003782	8705	beta-1,3-galactosyltransferase 4	B3GALT4	0.153499	0.0230379	1	0.0425522	0.652221	0	0.0466656	0.502182	0	0.0522658	0.999232	0	-0.0100015	0.986276	0	0.166032	0.162423	0	0.106833	0.713223	0	-0.00411339	0.996066	0	-0.110946	0.999957	0	-0.113766	0.598037	0	-0.176033	0.450077	0	-0.0622673	0.999975	0
A_33_P3282634	NM_001034173	NM_001034173	160428	aldehyde dehydrogenase 1 family member L2	ALDH1L2	-0.0728187	0.593965	0	0.0377826	0.82063	0	0.00898792	0.951003	0	0.128541	0.999232	0	-0.104006	0.791453	0	0.0878	0.687233	0	-0.0818067	0.863246	0	0.0287947	0.973359	0	0.110601	0.999957	0	0.0407406	0.922808	0	-0.191806	0.59382	0	-0.232546	0.999975	0
A_33_P3414669	NM_183353	NM_183353	51132	ring finger protein, LIM domain interacting	RLIM	-0.0277676	0.849503	0	-0.0289252	0.859953	0	-0.00452553	0.974337	0	-0.103426	0.999232	0	-0.0488113	0.930097	0	-0.156392	0.378503	0	-0.0232421	0.977229	0	-0.0243997	0.976881	0	-0.00115762	0.999957	0	0.052966	0.887778	0	0.10758	0.770375	0	0.0546142	0.999975	0
A_21_P0009711	NR_026887	NR_026887	80054	CEBPA divergent transcript	CEBPA-DT	-0.0297088	0.821716	0	0.0684601	0.529151	0	0.0158846	0.890188	0	0.0364648	0.999232	0	-0.114213	0.695229	0	0.0521141	0.793304	0	-0.0455934	0.930932	0	0.0525755	0.942809	0	0.0981689	0.999957	0	-0.0156493	0.968392	0	-0.166327	0.587995	0	-0.150678	0.999975	0
A_24_P336848	NM_138448	NM_138448	98	acylphosphatase 2	ACYP2	0.0203528	0.904966	0	0.0873575	0.493442	0	0.117582	0.211094	0	-0.0101029	0.999232	0	0.107343	0.788566	0	0.272166	0.127084	0	-0.0972292	0.841143	0	-0.0302246	0.972889	0	0.0670046	0.999957	0	-0.282269	0.367438	0	-0.164823	0.662352	0	0.117446	0.999975	0
A_21_P0011791	ENST00000435062	ENST00000435062				0.104685	0.728613	0	-0.0297955	0.943533	0	0.041655	0.878559	0	0.0130481	0.999232	0	0.0751067	0.953553	0	-0.248195	0.550695	0	0.0630304	0.969619	0	-0.0714506	0.968684	0	-0.134481	0.999957	0	0.261243	0.705007	0	0.323302	0.667158	0	0.0620587	0.999975	0
A_23_P92202	NM_021971	NM_021971	29925	GDP-mannose pyrophosphorylase B	GMPPB	-0.0694593	0.663515	0	-0.138878	0.258126	0	-0.023084	0.878214	0	-0.17195	0.999232	0	-0.116119	0.7941	0	0.0469057	0.867701	0	-0.0463752	0.95206	0	-0.115794	0.880221	0	-0.0694191	0.999957	0	-0.218856	0.532742	0	-0.163024	0.697626	0	0.0558312	0.999975	0
A_23_P26704	NM_024311	NM_024311	79157	major facilitator superfamily domain containing 11	MFSD11	-0.120492	0.24282	0	-0.113936	0.245604	0	-0.0863917	0.317568	0	-0.0960381	0.999232	0	-0.0374596	0.946773	0	0.157705	0.358001	0	-0.0341004	0.959846	0	-0.0275439	0.972293	0	0.00655658	0.999957	0	-0.253743	0.359824	0	-0.195165	0.544871	0	0.0585785	0.999975	0
A_23_P119789	NM_024121	NM_024121	79134	transmembrane protein 185B	TMEM185B	-0.099372	0.24282	0	-0.113666	0.139712	0	-0.0486119	0.536067	0	0.0356977	0.999232	0	-0.0144664	0.979935	0	0.11961	0.405619	0	-0.0507601	0.897639	0	-0.0650537	0.90003	0	-0.0142936	0.999957	0	-0.0839124	0.747333	0	-0.134077	0.622098	0	-0.0501642	0.999975	0
A_23_P101683	NM_001828	NM_001828	1178	Charcot-Leyden crystal galectin	CLC	0.349205	0.145999	0	0.210544	0.426075	0	0.284318	0.152944	0	-0.2626	0.999232	0	-0.0998556	0.941405	0	0.361635	0.394822	0	0.0648876	0.972402	0	-0.0737736	0.969173	0	-0.138661	0.999957	0	-0.624234	0.356217	0	-0.46149	0.558526	0	0.162744	0.999975	0
A_21_P0013325	TCONS_l2_00026658	TCONS_l2_00026658				0.0134938	0.939648	0	-0.0718888	0.593047	0	-0.0184533	0.891742	0	0.0654529	0.999232	0	0.0374095	0.952957	0	0.000389962	0.998867	0	0.0319471	0.968258	0	-0.0534355	0.952008	0	-0.0853826	0.999957	0	0.0650629	0.867344	0	0.0370196	0.935088	0	-0.0280434	0.999975	0
A_33_P3220390	BC028180	BC028180				0.173467	0.145597	0	0.0136751	0.95285	0	-0.00025251	0.998364	0	0.0319704	0.999232	0	0.0742685	0.895976	0	0.0472827	0.862312	0	0.173719	0.713813	0	0.0139276	0.987989	0	-0.159792	0.999957	0	-0.0153123	0.975311	0	0.0269858	0.957998	0	0.0422982	0.999975	0
A_23_P315836	NM_017451	NM_017451	10458	BAI1 associated protein 2	BAIAP2	-0.0104226	0.953288	0	-0.179157	0.0725003	0	-0.110274	0.237661	0	0.0502274	0.999232	0	0.211394	0.441887	0	-0.0984163	0.64553	0	0.0998511	0.828612	0	-0.0688828	0.934239	0	-0.168734	0.999957	0	0.148644	0.653204	0	0.30981	0.371031	0	0.161167	0.999975	0
A_23_P100602	NM_005993	NM_005993	6904	tubulin folding cofactor D	TBCD	-0.0899716	0.478142	0	-0.00576861	0.980584	0	-0.0845715	0.379697	0	0.0503105	0.999232	0	-0.125342	0.716896	0	0.151757	0.42889	0	-0.00540011	0.995972	0	0.0788029	0.910726	0	0.084203	0.999957	0	-0.101447	0.770855	0	-0.2771	0.413328	0	-0.175653	0.999975	0
A_23_P77066	NM_022807	NM_022807	6638	small nuclear ribonucleoprotein polypeptide N	SNRPN	-0.0255305	0.884702	0	0.0331838	0.862105	0	0.0483627	0.69858	0	-0.0285138	0.999232	0	0.0165175	0.985719	0	0.310949	0.0953247	0	-0.0738931	0.895847	0	-0.0151789	0.987804	0	0.0587142	0.999957	0	-0.339462	0.3087	0	-0.294431	0.428435	0	0.0450313	0.999975	0
A_23_P387552	NM_000966	NM_000966	5916	retinoic acid receptor gamma	RARG	0.0636832	0.839454	0	0.0722635	0.831567	0	0.0778068	0.743104	0	0.0841157	0.999232	0	0.0860737	0.944059	0	-0.0587879	0.913459	0	-0.0141236	0.994869	0	-0.00554327	0.999185	0	0.0085803	0.999957	0	0.142904	0.851591	0	0.144862	0.86569	0	0.00195799	0.999975	0
A_33_P3277970	XM_003960330	XM_003960330				0.0889162	0.642265	0	0.053418	0.813487	0	0.108835	0.425732	0	0.128871	0.999232	0	-0.0103932	0.991567	0	0.0246994	0.94982	0	-0.0199184	0.984807	0	-0.0554166	0.966283	0	-0.0354981	0.999957	0	0.104172	0.838493	0	-0.0350926	0.955976	0	-0.139264	0.999975	0
A_24_P146211	NM_021063	NM_021063	3017	histone cluster 1 H2B family member d	HIST1H2BD	-0.0408576	0.795207	0	0.0110843	0.960441	0	-0.0187841	0.891974	0	0.0745608	0.999232	0	-0.0690402	0.897184	0	-0.0712187	0.762558	0	-0.0220735	0.979833	0	0.0298684	0.972889	0	0.0519419	0.999957	0	0.14578	0.669304	0	0.00217849	0.996171	0	-0.143601	0.999975	0
A_23_P44139	NM_000947	NM_000947	5558	DNA primase subunit 2	PRIM2	0.154079	0.0974939	0	0.0314247	0.833314	0	0.03498	0.736684	0	0.0404302	0.999232	0	0.0501688	0.919832	0	-0.0417735	0.846247	0	0.119099	0.748068	0	-0.00355536	0.998511	0	-0.122655	0.999957	0	0.0822037	0.796808	0	0.0919423	0.799744	0	0.00973862	0.999975	0
A_23_P10442	NM_080597	NM_080597	114876	oxysterol binding protein like 1A	OSBPL1A	-0.0294249	0.825578	0	-0.0983172	0.306429	0	-0.0162761	0.889014	0	-0.0198024	0.999232	0	-0.0227771	0.971163	0	-0.155685	0.33467	0	-0.0131489	0.98427	0	-0.0820412	0.888161	0	-0.0688923	0.999957	0	0.135883	0.629102	0	0.132908	0.677782	0	-0.00297471	0.999975	0
A_33_P3309526	NM_002838	NM_002838	5788	protein tyrosine phosphatase, receptor type C	PTPRC	-0.204751	0.218611	0	-0.0958301	0.642637	0	0.0255246	0.897054	0	-0.250382	0.999232	0	0.218014	0.642836	0	0.074299	0.836197	0	-0.230275	0.716682	0	-0.121355	0.908064	0	0.108921	0.999957	0	-0.324681	0.476208	0	0.143715	0.815989	0	0.468397	0.999975	0
A_24_P542375	NM_002823	NM_002823	5757	prothymosin alpha	PTMA	0.00509088	0.985675	0	0.200999	0.183057	0	0.130498	0.345066	0	0.00492633	0.999232	0	0.0477917	0.957942	0	-0.180811	0.536282	0	-0.125407	0.850536	0	0.0705016	0.956703	0	0.195909	0.999957	0	0.185737	0.70128	0	0.228602	0.665215	0	0.0428654	0.999975	0
A_23_P124108	NM_000632	NM_000632	3684	integrin subunit alpha M	ITGAM	-0.341696	0.00838699	-1	-0.415016	0.000335171	-1	-0.218656	0.0463304	-1	-0.247966	0.999232	0	-0.133775	0.784165	0	-0.11606	0.67131	0	-0.12304	0.833618	0	-0.19636	0.84917	0	-0.0733202	0.999957	0	-0.131907	0.768092	0	-0.0177154	0.977579	0	0.114191	0.999975	0
A_23_P408353	NM_002116	NM_002116	3105	major histocompatibility complex, class I, A	HLA-A	-0.177822	0.337252	0	0.0212317	0.948021	0	-0.0416533	0.833168	0	-0.143733	0.999232	0	-0.098296	0.904985	0	0.251495	0.400494	0	-0.136169	0.850536	0	0.0628849	0.966286	0	0.199054	0.999957	0	-0.395228	0.408073	0	-0.349791	0.522551	0	0.0454371	0.999975	0
A_23_P116512	NM_024841	NM_024841	79899	proline rich 5 like	PRR5L	-0.033128	0.828691	0	-0.0557879	0.698695	0	0.0482796	0.664383	0	-0.0303034	0.999232	0	-0.0550192	0.921556	0	0.00731869	0.98052	0	-0.0814076	0.860803	0	-0.104068	0.876296	0	-0.0226599	0.999957	0	-0.037622	0.927628	0	-0.0623379	0.883625	0	-0.0247158	0.999975	0
A_23_P76799	NM_013448	NM_013448	11177	bromodomain adjacent to zinc finger domain 1A	BAZ1A	-0.0382296	0.870784	0	0.0918423	0.653287	0	0.0863908	0.581333	0	-0.0918208	0.999232	0	0.219548	0.632131	0	0.0901381	0.790205	0	-0.12462	0.854739	0	0.00545149	0.998599	0	0.130072	0.999957	0	-0.181959	0.714859	0	0.12941	0.834973	0	0.311369	0.999975	0
A_23_P100441	NM_024946	NM_024946	80011	family with sequence similarity 192 member A	FAM192A	0.0165143	0.876806	0	-0.014865	0.906595	0	0.0408641	0.559212	0	-0.028463	0.999232	0	-0.0762024	0.752733	0	-0.0440886	0.770928	0	-0.0243499	0.960492	0	-0.0557291	0.903873	0	-0.0313792	0.999957	0	0.0156256	0.957971	0	-0.0321138	0.911498	0	-0.0477393	0.999975	0
A_23_P86216	NM_002790	NM_002790	5686	proteasome subunit alpha 5	PSMA5	-0.00145958	0.996674	0	0.0828371	0.66618	0	0.110467	0.411913	0	-0.110539	0.999232	0	-0.121348	0.834664	0	0.312701	0.196725	0	-0.111927	0.860803	0	-0.0276299	0.981666	0	0.0842967	0.999957	0	-0.423241	0.311006	0	-0.434049	0.359105	0	-0.0108082	0.999975	0
A_21_P0012011	ENST00000454490	ENST00000454490				0.102703	0.403267	0	0.0323007	0.851519	0	-0.0188352	0.889064	0	0.00109587	0.999232	0	-0.0712211	0.886484	0	0.126421	0.533644	0	0.121539	0.772698	0	0.0511358	0.954214	0	-0.0704027	0.999957	0	-0.125325	0.712655	0	-0.197642	0.581683	0	-0.0723169	0.999975	0
A_19_P00326808	NR_047517	NR_047517	100124700	HOX transcript antisense RNA	HOTAIR	-0.00362085	0.98923	0	0.0587506	0.773555	0	-0.00382907	0.986026	0	-0.1743	0.999232	0	-0.181749	0.666824	0	0.0765165	0.799854	0	0.00020822	0.999756	0	0.0625797	0.958043	0	0.0623715	0.999957	0	-0.250816	0.532742	0	-0.258266	0.577313	0	-0.00744943	0.999975	0
A_24_P46953	NM_013257	NM_013257	23678	serum/glucocorticoid regulated kinase family member 3	SGK3	0.0136907	0.94536	0	-0.0882193	0.545141	0	0.0585115	0.644197	0	0.0057772	0.999232	0	0.0647108	0.919122	0	-0.0909348	0.717646	0	-0.0448207	0.955814	0	-0.146731	0.863646	0	-0.10191	0.999957	0	0.096712	0.818017	0	0.155646	0.717903	0	0.0589336	0.999975	0
A_23_P6561	NM_018029	NM_018029	55096	endogenous Bornavirus like nucleoprotein 2	EBLN2	0.0382518	0.801765	0	-0.114117	0.299963	0	-0.102434	0.26974	0	0.0618464	0.999232	0	0.114866	0.752712	0	0.028834	0.913696	0	0.140686	0.739227	0	-0.0116829	0.988895	0	-0.152368	0.999957	0	0.0330124	0.936613	0	0.0860324	0.836864	0	0.05302	0.999975	0
A_33_P3302957	NM_015432	NM_015432	25894	pleckstrin homology and RhoGEF domain containing G4	PLEKHG4	-0.103048	0.365179	0	-0.0455844	0.753778	0	-0.0246436	0.837509	0	-0.034917	0.999232	0	-0.127597	0.688534	0	0.0803551	0.697371	0	-0.078404	0.859573	0	-0.0209408	0.980712	0	0.0574633	0.999957	0	-0.115272	0.720118	0	-0.207952	0.529223	0	-0.0926798	0.999975	0
A_33_P3211473	NM_015024	NM_015024	23039	exportin 7	XPO7	-0.140341	0.0744559	0	-0.119618	0.122362	0	0.0268466	0.768769	0	-0.0959793	0.999232	0	0.0387039	0.932428	0	-0.260288	0.0453859	-1	-0.167188	0.685006	0	-0.146464	0.828696	0	0.0207235	0.999957	0	0.164309	0.483227	0	0.298992	0.284868	0	0.134683	0.999975	0
A_23_P104318	NM_019058	NM_019058	54541	DNA damage inducible transcript 4	DDIT4	0.0916284	0.662109	0	-0.0127842	0.969481	0	0.283709	0.0266075	1	0.00383573	0.999232	0	0.0303004	0.979535	0	0.202891	0.490108	0	-0.19208	0.759413	0	-0.296493	0.827784	0	-0.104413	0.999957	0	-0.199056	0.688125	0	-0.172591	0.767178	0	0.0264647	0.999975	0
A_23_P10815	NM_001020658	NM_001020658	9698	pumilio RNA binding family member 1	PUM1	-0.11146	0.505928	0	-0.014785	0.957362	0	0.0620963	0.669221	0	-0.170823	0.999232	0	0.0433026	0.957821	0	-0.067442	0.827189	0	-0.173557	0.748068	0	-0.0768813	0.944561	0	0.0966755	0.999957	0	-0.103381	0.827989	0	0.110745	0.838226	0	0.214126	0.999975	0
A_23_P341325	NM_080746	NM_080746	140801	ribosomal protein L10 like	RPL10L	0.192224	0.196822	0	0.235188	0.0770673	0	0.156322	0.200522	0	0.0720188	0.999232	0	0.234886	0.545531	0	0.462071	0.0444817	1	0.0359021	0.975342	0	0.0788666	0.944629	0	0.0429645	0.999957	0	-0.390052	0.343749	0	-0.227186	0.641206	0	0.162867	0.999975	0
A_21_P0002768	ENST00000479610	ENST00000479610				0.135045	0.683187	0	0.112927	0.75225	0	0.0734651	0.794543	0	0.0762298	0.999232	0	0.148677	0.902653	0	-0.412424	0.34365	0	0.0615797	0.975462	0	0.0394622	0.983486	0	-0.0221175	0.999957	0	0.488653	0.495161	0	0.561101	0.488411	0	0.0724472	0.999975	0
A_23_P210886	NM_138578	NM_138578	598	BCL2 like 1	BCL2L1	-0.190775	0.5092	0	0.00850751	0.9869	0	0.300043	0.127348	0	0.0686864	0.999232	0	0.185142	0.848541	0	-0.424514	0.298486	0	-0.490818	0.685006	0	-0.291535	0.858639	0	0.199282	0.999957	0	0.493201	0.466487	0	0.609656	0.42166	0	0.116455	0.999975	0
A_23_P70127	NM_017510	NM_017510	54732	transmembrane p24 trafficking protein 9	TMED9	0.0536187	0.770963	0	0.0515269	0.796118	0	0.201899	0.0586261	0	-0.300709	0.999232	0	-0.0100801	0.991567	0	0.358986	0.0900601	0	-0.14828	0.775205	0	-0.150372	0.867538	0	-0.00209178	0.999957	0	-0.659695	0.141652	0	-0.369066	0.382487	0	0.290629	0.999975	0
A_33_P3287922	NM_014657	NM_014657	9675	TELO2 interacting protein 1	TTI1	-0.00719961	0.960681	0	-0.0797606	0.41382	0	-0.0277	0.780623	0	-0.0600759	0.999232	0	-0.088408	0.780973	0	-0.053257	0.779927	0	0.0205003	0.977229	0	-0.0520606	0.938617	0	-0.072561	0.999957	0	-0.00681892	0.985889	0	-0.035151	0.923828	0	-0.0283321	0.999975	0
A_23_P320739	NM_002397	NM_002397	4208	myocyte enhancer factor 2C	MEF2C	-0.0359615	0.827875	0	6.56021e-05	0.999855	0	0.12595	0.194533	0	-0.100457	0.999232	0	0.00882145	0.991567	0	-0.0333814	0.905931	0	-0.161912	0.719429	0	-0.125885	0.873592	0	0.0360271	0.999957	0	-0.0670752	0.870413	0	0.0422028	0.929676	0	0.109278	0.999975	0
A_21_P0002692	TCONS_00005339	TCONS_00005339				0.140086	0.456061	0	0.0144286	0.964209	0	-0.0205126	0.920395	0	0.176807	0.999232	0	-0.0771921	0.930097	0	-0.223459	0.437932	0	0.160599	0.801625	0	0.0349412	0.97976	0	-0.125658	0.999957	0	0.400266	0.374004	0	0.146267	0.810609	0	-0.253999	0.999975	0
A_23_P146187	NM_015169	NM_015169	23212	ribosome biogenesis regulator homolog	RRS1	-0.0544531	0.711453	0	-0.066726	0.631532	0	-0.0038602	0.980302	0	-0.0810297	0.999232	0	-0.201154	0.46856	0	-0.0343816	0.896861	0	-0.0505929	0.936028	0	-0.0628658	0.940231	0	-0.0122729	0.999957	0	-0.0466481	0.910919	0	-0.166773	0.649662	0	-0.120125	0.999975	0
A_23_P122724	NM_004665	NM_004665	8875	vanin 2	VNN2	-0.128678	0.591067	0	-0.170388	0.41546	0	0.0770409	0.705051	0	-0.135149	0.999232	0	0.282704	0.60022	0	0.220413	0.538884	0	-0.205719	0.785478	0	-0.247429	0.850492	0	-0.0417104	0.999957	0	-0.355562	0.515402	0	0.0622907	0.936915	0	0.417852	0.999975	0
A_23_P57819	NM_014760	NM_014760	9797	TatD DNase domain containing 2	TATDN2	-0.0701418	0.47964	0	-0.0428768	0.70481	0	-0.142284	0.033099	-1	-0.0125047	0.999232	0	-0.144967	0.504807	0	-0.0231618	0.910134	0	0.0721419	0.841236	0	0.0994069	0.864148	0	0.027265	0.999957	0	0.0106571	0.975473	0	-0.121805	0.668291	0	-0.132463	0.999975	0
A_23_P102404	NM_006429	NM_006429	10574	chaperonin containing TCP1 subunit 7	CCT7	-7.87264e-05	0.999317	0	0.0633867	0.593048	0	0.0274039	0.800505	0	-0.0593003	0.999232	0	-0.113102	0.716896	0	0.221116	0.157235	0	-0.0274826	0.969619	0	0.0359828	0.966283	0	0.0634654	0.999957	0	-0.280416	0.307527	0	-0.334218	0.309727	0	-0.0538018	0.999975	0
A_23_P19702	NM_015093	NM_015093	23118	TGF-beta activated kinase 1 (MAP3K7) binding protein 2	TAB2	-0.173315	0.453386	0	-0.0741971	0.802723	0	0.0623345	0.776009	0	-0.332103	0.999232	0	0.153547	0.848046	0	-0.0967498	0.823887	0	-0.235649	0.759074	0	-0.136532	0.921168	0	0.0991177	0.999957	0	-0.235353	0.700811	0	0.250296	0.715901	0	0.48565	0.999975	0
A_24_P322847	NM_001018050	NM_001018050	171568	RNA polymerase III subunit H	POLR3H	-0.00590406	0.970015	0	-0.0771807	0.459575	0	-0.0415962	0.666248	0	-0.0363499	0.999232	0	-0.10885	0.716896	0	-0.0368546	0.861936	0	0.0356921	0.951968	0	-0.0355845	0.966283	0	-0.0712766	0.999957	0	0.000504725	0.998815	0	-0.0719957	0.842525	0	-0.0725004	0.999975	0
A_23_P110712	NM_004417	NM_004417	1843	dual specificity phosphatase 1	DUSP1	-0.00304598	0.992336	0	-0.0993899	0.603296	0	0.130964	0.337377	0	-0.0209693	0.999232	0	0.119925	0.848541	0	-0.0485101	0.896798	0	-0.13401	0.841236	0	-0.230354	0.840922	0	-0.0963439	0.999957	0	0.0275408	0.967365	0	0.168435	0.762612	0	0.140894	0.999975	0
A_21_P0000252	NR_002450	NR_002450	606500	small nucleolar RNA, C/D box 68	SNORD68	0.29835	0.0946515	0	0.195233	0.301973	0	-0.0129122	0.959753	0	0.234165	0.999232	0	0.150284	0.838855	0	0.210187	0.543558	0	0.311263	0.690317	0	0.208146	0.867538	0	-0.103117	0.999957	0	0.0239775	0.974674	0	-0.0599033	0.937101	0	-0.0838809	0.999975	0
A_24_P311771	NM_016107	NM_016107	51663	zinc finger RNA binding protein	ZFR	-0.09548	0.377115	0	-0.0360263	0.804667	0	-0.0169151	0.888538	0	-0.0683578	0.999232	0	-0.044704	0.933986	0	0.177464	0.275006	0	-0.0785649	0.849342	0	-0.0191112	0.981347	0	0.0594537	0.999957	0	-0.245822	0.365855	0	-0.222168	0.47482	0	0.0236538	0.999975	0
A_33_P3269359	NM_139015	NM_139015	121665	signal peptide peptidase like 3	SPPL3	-0.0437341	0.69011	0	-0.0810657	0.353387	0	-0.0347656	0.692148	0	0.0197752	0.999232	0	-0.0428779	0.920633	0	0.190869	0.153966	0	-0.00896849	0.98866	0	-0.0463001	0.943056	0	-0.0373316	0.999957	0	-0.171094	0.462813	0	-0.233747	0.372203	0	-0.0626532	0.999975	0
A_23_P94301	NM_003313	NM_003313	7264	tissue specific transplantation antigen P35B	TSTA3	0.110503	0.692458	0	0.256703	0.21373	0	0.178116	0.339233	0	0.321741	0.999232	0	0.368217	0.499847	0	0.0711241	0.887558	0	-0.0676127	0.964224	0	0.078587	0.966283	0	0.1462	0.999957	0	0.250617	0.701636	0	0.297093	0.679839	0	0.046476	0.999975	0
A_33_P3258946	NM_001193286	NM_001193286	22933	sirtuin 2	SIRT2	-0.207727	0.0514841	0	-0.189472	0.0664006	0	-0.080595	0.441661	0	-0.0516699	0.999232	0	-0.125196	0.74033	0	-0.118876	0.579386	0	-0.127132	0.772698	0	-0.108877	0.876296	0	0.0182542	0.999957	0	0.067206	0.867631	0	-0.00632056	0.990021	0	-0.0735266	0.999975	0
A_33_P3269588	NM_002040	NM_002040	2551	GA binding protein transcription factor alpha subunit	GABPA	0.0095868	0.9705	0	0.119645	0.495259	0	0.196734	0.116575	0	-0.0683032	0.999232	0	0.142189	0.798539	0	0.247157	0.354044	0	-0.187147	0.753668	0	-0.0770887	0.950274	0	0.110058	0.999957	0	-0.315461	0.465449	0	-0.104968	0.860665	0	0.210492	0.999975	0
A_24_P322741	NM_000628	NM_000628	3588	interleukin 10 receptor subunit beta	IL10RB	-0.16273	0.329761	0	-0.0671655	0.759318	0	0.0292097	0.876636	0	-0.00939456	0.999232	0	0.0256022	0.980529	0	0.0974798	0.762661	0	-0.19194	0.748068	0	-0.0963752	0.934239	0	0.0955644	0.999957	0	-0.106874	0.83882	0	-0.0718775	0.90665	0	0.0349968	0.999975	0
A_21_P0001365	TCONS_00001109	TCONS_00001109				-0.107523	0.377081	0	-0.0984745	0.405574	0	0.0173886	0.896778	0	-0.276627	0.999232	0	-0.0221867	0.976575	0	-0.205949	0.258103	0	-0.124911	0.769585	0	-0.115863	0.873679	0	0.00904825	0.999957	0	-0.0706787	0.852422	0	0.183762	0.612465	0	0.254441	0.999975	0
A_23_P66117	NM_032039	NM_032039	83986	family with sequence similarity 234 member A	FAM234A	0.0187473	0.885908	0	-0.0996438	0.253799	0	-0.0725143	0.348955	0	-0.00541438	0.999232	0	-0.119071	0.640129	0	-0.170451	0.240962	0	0.0912616	0.792672	0	-0.0271295	0.968684	0	-0.118391	0.999957	0	0.165037	0.505215	0	0.0513802	0.881777	0	-0.113657	0.999975	0
A_33_P3251289	NM_018445	NM_018445	55829	selenoprotein S	SELENOS	-0.00917932	0.953929	0	0.0684176	0.560142	0	-0.00778057	0.952948	0	-0.0139109	0.999232	0	-0.0177438	0.979788	0	-0.060689	0.770287	0	-0.00139875	0.997941	0	0.0761981	0.903873	0	0.0775969	0.999957	0	0.0467781	0.899392	0	0.0429452	0.914434	0	-0.00383293	0.999975	0
A_33_P3326733	ENST00000471055	ENST00000471055				0.0927331	0.595386	0	-0.0291599	0.906204	0	-0.218088	0.0505897	0	0.141895	0.999232	0	-0.0554679	0.943877	0	-0.0930478	0.748858	0	0.310821	0.685006	0	0.188928	0.850492	0	-0.121893	0.999957	0	0.234943	0.559653	0	0.0375799	0.948367	0	-0.197363	0.999975	0
A_33_P3411325	THC2668129	THC2668129				0.253484	0.20774	0	0.0601017	0.845157	0	-0.0211652	0.934647	0	-0.00352674	0.999232	0	0.112681	0.905744	0	-0.220784	0.547341	0	0.274649	0.719429	0	0.0812669	0.961663	0	-0.193382	0.999957	0	0.217257	0.725105	0	0.333465	0.607578	0	0.116208	0.999975	0
A_21_P0013225	TCONS_l2_00025962	TCONS_l2_00025962				0.0513165	0.701994	0	-0.0317962	0.839815	0	-0.00675825	0.961292	0	0.102906	0.999232	0	0.00479057	0.993518	0	-0.00395292	0.990082	0	0.0580748	0.911065	0	-0.025038	0.975114	0	-0.0831128	0.999957	0	0.106859	0.738127	0	0.00874349	0.984907	0	-0.0981156	0.999975	0
A_21_P0000158	NM_001204827	NM_001204827	63929	X-prolyl aminopeptidase 3	XPNPEP3	-0.036892	0.78958	0	-0.0635388	0.603237	0	-0.0743154	0.409034	0	0.0170046	0.999232	0	0.00253241	0.996467	0	-0.263261	0.0925434	0	0.0374233	0.95206	0	0.0107766	0.988895	0	-0.0266467	0.999957	0	0.280266	0.314487	0	0.265793	0.396523	0	-0.0144722	0.999975	0
A_24_P333733	NM_005177	NM_005177	535	ATPase H+ transporting V0 subunit a1	ATP6V0A1	-0.0822881	0.510879	0	-0.209945	0.022266	-1	-0.229498	0.005577	-1	-0.104334	0.999232	0	-0.276808	0.187615	0	-0.147198	0.429572	0	0.14721	0.719429	0	0.0195532	0.981666	0	-0.127657	0.999957	0	0.0428641	0.914488	0	-0.129611	0.720634	0	-0.172475	0.999975	0
A_23_P85180	NM_003492	NM_003492	8269	transmembrane protein 187	TMEM187	0.00639958	0.969283	0	0.0175723	0.923847	0	-0.0139397	0.910789	0	0.0984933	0.999232	0	0.0307648	0.957821	0	-0.0813541	0.682057	0	0.0203393	0.979808	0	0.031512	0.968684	0	0.0111727	0.999957	0	0.179847	0.527934	0	0.112119	0.751929	0	-0.0677285	0.999975	0
A_23_P47565	NM_005566	NM_005566	3939	lactate dehydrogenase A	LDHA	-0.0823747	0.614482	0	0.0523259	0.782126	0	0.0976504	0.405012	0	-0.142176	0.999232	0	-0.121631	0.7941	0	0.263587	0.215909	0	-0.180025	0.719429	0	-0.0453244	0.966988	0	0.134701	0.999957	0	-0.405763	0.268235	0	-0.385219	0.350538	0	0.0205442	0.999975	0
A_24_P330971	NM_013234	NM_013234	27335	eukaryotic translation initiation factor 3 subunit K	EIF3K	0.0318157	0.855876	0	0.105307	0.424775	0	0.134202	0.180226	0	-0.00886183	0.999232	0	-0.0109335	0.990627	0	0.39897	0.0358567	1	-0.102386	0.84288	0	-0.0288945	0.976899	0	0.0734914	0.999957	0	-0.407832	0.254157	0	-0.409903	0.309727	0	-0.00207171	0.999975	0
A_23_P42353	NM_016135	NM_016135	51513	ETS variant 7	ETV7	-0.232724	0.526851	0	0.295303	0.358152	0	-0.164382	0.585636	0	0.0239513	0.999232	0	-0.402822	0.654152	0	0.294157	0.617026	0	-0.0683419	0.978095	0	0.459685	0.836911	0	0.528027	0.999957	0	-0.270206	0.788275	0	-0.696979	0.477203	0	-0.426773	0.999975	0
A_33_P3241393	NM_133478	NM_133478	57835	solute carrier family 4 member 5	SLC4A5	-0.158586	0.15476	0	-0.106197	0.36986	0	-0.0687767	0.518748	0	-0.1552	0.999232	0	-0.0875057	0.845594	0	0.053164	0.829341	0	-0.0898093	0.850536	0	-0.0374207	0.968415	0	0.0523886	0.999957	0	-0.208364	0.510854	0	-0.14067	0.717606	0	0.0676944	0.999975	0
A_23_P119448	NM_014931	NM_014931	22870	protein phosphatase 6 regulatory subunit 1	PPP6R1	0.207233	0.714276	0	0.371822	0.419331	0	-0.332073	0.379247	0	0.0575257	0.999232	0	0.180848	0.938495	0	0.0478862	0.966272	0	0.539306	0.745119	0	0.703895	0.835508	0	0.164589	0.999957	0	0.00963953	0.995518	0	0.132962	0.939158	0	0.123323	0.999975	0
A_33_P3332135	NM_001143804	NM_001143804	162466	phosphoethanolamine/phosphocholine phosphatase	PHOSPHO1	0.0269554	0.94451	0	-0.166652	0.559573	0	0.133194	0.571039	0	0.0948442	0.999232	0	0.0767929	0.955733	0	-0.659154	0.0828152	0	-0.106239	0.93922	0	-0.299846	0.851157	0	-0.193608	0.999957	0	0.753998	0.267202	0	0.735947	0.337272	0	-0.0180513	0.999975	0
[truncated: 19,454 more rows]
