# Supplementary material for: Vitamins D2 and D3 have overlapping but different effects on human gene expression revealed through analysis of blood transcriptomes in a randomised double-blind placebo-controlled food-fortification trial
Source: medRxiv preprint, doi:10.1101/2020.12.16.20247700, version 2 (2021-02-22)
Supplement: Supplemental data file 6 [file 247700_file07.xlsx]

## Sheet: Sheet 1
ProbeName	SYMBOL	ENTREZID	GENENAME	net.WE.moduleColor	net.SA.moduleColor
A_23_P117082	HEBP1	50865	heme binding protein 1	yellow	darkgreen
A_21_P0000509	SNAR-G2	100170228	small ILF3/NF90-associated RNA G2	magenta	turquoise
A_23_P110167	MGST2	4258	microsomal glutathione S-transferase 2	midnightblue	magenta
A_33_P3211513	CLK1	1195	CDC like kinase 1	purple	midnightblue
A_33_P3414202	MBNL3	55796	muscleblind like splicing regulator 3	yellow	darkred
A_33_P3316686	CYB5R4	51167	cytochrome b5 reductase 4	pink	orange
A_33_P3263061	AK3	50808	adenylate kinase 3	brown	turquoise
A_24_P278460	FAR1	84188	fatty acyl-CoA reductase 1	purple	grey60
A_23_P340890	THAP3	90326	THAP domain containing 3	brown	green
A_21_P0010885	TMEM14B	81853	transmembrane protein 14B	red	black
A_33_P3379396	KRT1	3848	keratin 1	yellow	red
A_33_P3732466	NA	NA	NA	red	black
A_33_P3402773	NA	NA	NA	blue	white
A_33_P3402035	TRAF4	9618	TNF receptor associated factor 4	brown	turquoise
A_23_P11543	FUCA1	2517	alpha-L-fucosidase 1	purple	yellow
A_23_P103765	FCER1A	2205	Fc fragment of IgE receptor Ia	purple	grey60
A_23_P118888	PAFAH1B1	5048	platelet activating factor acetylhydrolase 1b regulatory subunit 1	midnightblue	magenta
A_33_P3350056	MT1X	4501	metallothionein 1X	purple	skyblue
A_24_P787889	TMEM191B	728229	transmembrane protein 191B	brown	darkorange
A_21_P0014626	RNF13	11342	ring finger protein 13	tan	lightgreen
A_23_P203658	PICALM	8301	phosphatidylinositol binding clathrin assembly protein	pink	lightyellow
A_23_P102060	SSFA2	6744	sperm specific antigen 2	greenyellow	grey60
A_23_P206140	DNAJA4	55466	DnaJ heat shock protein family (Hsp40) member A4	yellow	red
A_23_P14389	ACIN1	22985	apoptotic chromatin condensation inducer 1	magenta	turquoise
A_33_P3241482	ZNF346	23567	zinc finger protein 346	green	turquoise
A_23_P145541	FIG4	9896	FIG4 phosphoinositide 5-phosphatase	cyan	yellow
A_23_P144096	CISH	1154	cytokine inducible SH2 containing protein	red	black
A_23_P63896	FAS	355	Fas cell surface death receptor	tan	lightgreen
A_32_P199252	HSP90AA1	3320	heat shock protein 90 alpha family class A member 1	red	midnightblue
A_33_P3424489	NA	NA	NA	cyan	pink
A_33_P3245927	OGFOD2	79676	2-oxoglutarate and iron dependent oxygenase domain containing 2	brown	brown
A_33_P3306973	NA	NA	NA	tan	darkgreen
A_33_P3235690	THOC2	57187	THO complex 2	magenta	turquoise
A_21_P0004992	NA	NA	NA	black	salmon
A_33_P3282898	NA	NA	NA	pink	orange
A_19_P00320028	LINC01004	100216546	long intergenic non-protein coding RNA 1004	magenta	turquoise
A_23_P114282	MCTS1	28985	MCTS1, re-initiation and release factor	turquoise	darkgreen
A_21_P0001847	NA	NA	NA	black	salmon
A_33_P3325018	ERLEC1	27248	endoplasmic reticulum lectin 1	tan	darkgreen
A_23_P102937	SUMO3	6612	small ubiquitin-like modifier 3	greenyellow	darkturquoise
A_24_P41021	FBXO33	254170	F-box protein 33	purple	midnightblue
A_23_P258340	PPIA	5478	peptidylprolyl isomerase A	salmon	tan
A_21_P0014949	NPEPPS	9520	aminopeptidase puromycin sensitive	midnightblue	turquoise
A_23_P162702	HECTD4	283450	HECT domain E3 ubiquitin protein ligase 4	greenyellow	red
A_23_P434518	LFNG	3955	LFNG O-fucosylpeptide 3-beta-N-acetylglucosaminyltransferase	black	salmon
A_21_P0003091	NA	NA	NA	salmon	tan
A_23_P61042	NA	NA	NA	cyan	pink
A_23_P119907	ANKZF1	55139	ankyrin repeat and zinc finger domain containing 1	cyan	yellow
A_33_P3284404	SYNGR1	9145	synaptogyrin 1	cyan	yellow
A_32_P215938	GPSM1	26086	G protein signaling modulator 1	brown	brown
A_23_P101960	ZFP36L2	678	ZFP36 ring finger protein like 2	purple	yellow
A_24_P252575	RABGAP1	23637	RAB GTPase activating protein 1	purple	blue
A_23_P63459	COA6	388753	cytochrome c oxidase assembly factor 6	turquoise	royalblue
A_33_P3215028	C6orf89	221477	chromosome 6 open reading frame 89	midnightblue	lightcyan
A_33_P3340085	POLDIP3	84271	DNA polymerase delta interacting protein 3	magenta	darkgrey
A_23_P215175	ABCF2	10061	ATP binding cassette subfamily F member 2	cyan	tan
A_23_P252748	ZNF195	7748	zinc finger protein 195	turquoise	darkturquoise
A_23_P214678	CUTA	51596	cutA divalent cation tolerance homolog	brown	brown
A_23_P106463	OAZ2	4947	ornithine decarboxylase antizyme 2	cyan	purple
A_24_P153043	RPL23AP7	118433	ribosomal protein L23a pseudogene 7	red	black
A_24_P149395	WIPI2	26100	WD repeat domain, phosphoinositide interacting 2	pink	red
A_21_P0012208	NA	NA	NA	salmon	tan
A_23_P104563	CPT1A	1374	carnitine palmitoyltransferase 1A	magenta	darkgrey
A_24_P336577	FAM212B	55924	family with sequence similarity 212 member B	midnightblue	magenta
A_33_P3384108	SLC19A1	6573	solute carrier family 19 member 1	midnightblue	magenta
A_23_P59153	LSM2	57819	LSM2 homolog, U6 small nuclear RNA and mRNA degradation associated	cyan	tan
A_23_P53646	NAP1L1	4673	nucleosome assembly protein 1 like 1	tan	lightgreen
A_23_P103442	MEAF6	64769	MYST/Esa1 associated factor 6	salmon	darkturquoise
A_21_P0008647	DRAIC	145837	downregulated RNA in cancer, inhibitor of cell invasion and migration	blue	greenyellow
A_23_P106675	PLCG2	5336	phospholipase C gamma 2	pink	purple
A_32_P231086	GOLGA6L9	440295	golgin A6 family-like 9	red	black
A_23_P31073	MYB	4602	MYB proto-oncogene, transcription factor	tan	darkgreen
A_23_P110961	MPC1	51660	mitochondrial pyruvate carrier 1	tan	darkgreen
A_23_P113803	KATNA1	11104	katanin catalytic subunit A1	greenyellow	darkturquoise
A_23_P123727	ZCCHC6	79670	zinc finger CCHC-type containing 6	pink	grey60
A_23_P213518	CAST	831	calpastatin	tan	darkgreen
A_23_P112113	WASHC5	9897	WASH complex subunit 5	greenyellow	grey60
A_33_P3291776	NANS	54187	N-acetylneuraminate synthase	black	orange
A_23_P109774	ZBTB11	27107	zinc finger and BTB domain containing 11	tan	lightgreen
A_23_P99891	TLNRD1	59274	talin rod domain containing 1	brown	darkgreen
A_23_P27724	SELENOW	6415	selenoprotein W	brown	brown
A_23_P160849	FCER1G	2207	Fc fragment of IgE receptor Ig	cyan	purple
A_24_P823684	HSP90AB1	3326	heat shock protein 90 alpha family class B member 1	red	lightyellow
A_23_P217659	BRCC3	79184	BRCA1/BRCA2-containing complex subunit 3	tan	darkgreen
A_23_P137543	ZNF362	149076	zinc finger protein 362	brown	darkorange
A_33_P3270599	TPM2	7169	tropomyosin 2	brown	darkorange
A_21_P0011326	NA	NA	NA	blue	greenyellow
A_23_P40952	RAF1	5894	Raf-1 proto-oncogene, serine/threonine kinase	cyan	purple
A_23_P45166	PLPBP	11212	pyridoxal phosphate binding protein	brown	darkorange
A_23_P334608	GUSB	2990	glucuronidase beta	green	brown
A_23_P53137	HBG1	3047	hemoglobin subunit gamma 1	yellow	darkred
A_24_P166094	ARFIP1	27236	ADP ribosylation factor interacting protein 1	tan	lightgreen
A_21_P0009821	LINC00659	100652730	long intergenic non-protein coding RNA 659	black	greenyellow
A_23_P593	GPBP1L1	60313	GC-rich promoter binding protein 1 like 1	tan	lightgreen
A_33_P3272189	MFSD9	84804	major facilitator superfamily domain containing 9	magenta	turquoise
A_23_P112652	CNOT10	25904	CCR4-NOT transcription complex subunit 10	brown	turquoise
A_21_P0000477	SNORA11B	100124539	small nucleolar RNA, H/ACA box 11B	magenta	turquoise
A_33_P3226080	SCIMP	388325	SLP adaptor and CSK interacting membrane protein	blue	skyblue
A_23_P105392	CCT2	10576	chaperonin containing TCP1 subunit 2	turquoise	royalblue
A_33_P3338166	NUAK2	81788	NUAK family kinase 2	midnightblue	magenta
A_23_P77401	CPPED1	55313	calcineurin like phosphoesterase domain containing 1	purple	purple
A_32_P12639	PSMD12	5718	proteasome 26S subunit, non-ATPase 12	greenyellow	lightgreen
A_24_P268160	DRAM2	128338	DNA damage regulated autophagy modulator 2	purple	grey60
A_23_P106056	DAD1	1603	defender against cell death 1	salmon	tan
A_33_P3367106	PFN1P2	767846	profilin 1 pseudogene 2	cyan	blue
A_21_P0010868	NA	NA	NA	blue	greenyellow
A_33_P3239102	NA	NA	NA	black	lightcyan
A_24_P388528	ST6GAL1	6480	ST6 beta-galactoside alpha-2,6-sialyltransferase 1	salmon	tan
A_21_P0003137	MTRNR2L2	100462981	MT-RNR2 like 2	red	midnightblue
A_23_P158829	ARRB2	409	arrestin beta 2	cyan	blue
A_33_P3409553	NA	NA	NA	red	black
A_23_P398275	GOLGA2P7	388152	golgin A2 pseudogene 7	brown	brown
A_23_P430411	NA	NA	NA	midnightblue	turquoise
A_23_P136413	MMP17	4326	matrix metallopeptidase 17	blue	white
A_23_P111132	HSPA1A	3303	heat shock protein family A (Hsp70) member 1A	pink	purple
A_23_P9362	PSMB7	5695	proteasome subunit beta 7	turquoise	darkturquoise
A_21_P0009319	NA	NA	NA	black	salmon
A_23_P88249	RBM23	55147	RNA binding motif protein 23	cyan	yellow
A_33_P3274851	COX5B	1329	cytochrome c oxidase subunit 5B	brown	brown
A_23_P103631	EBNA1BP2	10969	EBNA1 binding protein 2	green	darkturquoise
A_23_P49338	TNFRSF12A	51330	TNF receptor superfamily member 12A	pink	purple
A_23_P118690	ZNF207	7756	zinc finger protein 207	greenyellow	grey60
A_33_P3252043	P4HB	5034	prolyl 4-hydroxylase subunit beta	brown	darkorange
A_23_P163161	SDR39U1	56948	short chain dehydrogenase/reductase family 39U member 1	salmon	green
A_23_P120414	YWHAB	7529	tyrosine 3-monooxygenase/tryptophan 5-monooxygenase activation protein beta	greenyellow	darkturquoise
A_23_P104054	SUCO	51430	SUN domain containing ossification factor	tan	lightgreen
A_23_P11279	ALG13	79868	ALG13, UDP-N-acetylglucosaminyltransferase subunit	magenta	lightyellow
A_23_P168229	TXNDC5	81567	thioredoxin domain containing 5	cyan	pink
A_24_P302695	MRPL30	51263	mitochondrial ribosomal protein L30	turquoise	darkgreen
A_33_P3344991	NA	NA	NA	blue	white
A_23_P93623	ATP6V1F	9296	ATPase H+ transporting V1 subunit F	brown	green
A_23_P118435	SUMO2	6613	small ubiquitin-like modifier 2	salmon	tan
A_24_P117029	LDLR	3949	low density lipoprotein receptor	green	darkturquoise
A_23_P361940	CD84	8832	CD84 molecule	salmon	lightyellow
A_23_P108922	NA	NA	NA	purple	midnightblue
A_23_P107073	RPA1	6117	replication protein A1	greenyellow	grey60
A_23_P138680	IL15RA	3601	interleukin 15 receptor subunit alpha	cyan	blue
A_19_P00800006	NA	NA	NA	salmon	tan
A_21_P0008531	NA	NA	NA	black	salmon
A_33_P3360555	ZNF444	55311	zinc finger protein 444	brown	brown
A_23_P500799	CASP6	839	caspase 6	purple	tan
A_23_P216017	ENTPD4	9583	ectonucleoside triphosphate diphosphohydrolase 4	cyan	tan
A_33_P3395369	AMD1	262	adenosylmethionine decarboxylase 1	pink	orange
A_24_P62615	CAP1	10487	cyclase associated actin cytoskeleton regulatory protein 1	cyan	yellow
A_33_P3271990	DGAT1	8694	diacylglycerol O-acyltransferase 1	midnightblue	lightcyan
A_23_P100203	HSBP1	3281	heat shock factor binding protein 1	greenyellow	grey60
A_23_P100392	ELOB	6923	elongin B	brown	turquoise
A_23_P161446	GDI2	2665	GDP dissociation inhibitor 2	purple	grey60
A_21_P0002073	NA	NA	NA	black	salmon
A_33_P3239152	RABEP2	79874	rabaptin, RAB GTPase binding effector protein 2	brown	brown
A_23_P156319	LARP1	23367	La ribonucleoprotein domain family member 1	purple	yellow
A_23_P117734	LYSMD4	145748	LysM domain containing 4	green	brown
A_33_P3383226	GP9	2815	glycoprotein IX platelet	black	cyan
A_23_P109877	WDR82	80335	WD repeat domain 82	cyan	yellow
A_23_P209805	NAB1	4664	NGFI-A binding protein 1	pink	orange
A_23_P406227	SNAI3-AS1	197187	SNAI3 antisense RNA 1	midnightblue	turquoise
A_24_P64167	PTGS1	5742	prostaglandin-endoperoxide synthase 1	purple	darkred
A_24_P289726	PSMD3	5709	proteasome 26S subunit, non-ATPase 3	cyan	yellow
A_23_P123539	PPP2R2A	5520	protein phosphatase 2 regulatory subunit Balpha	cyan	purple
A_23_P117546	SOS2	6655	SOS Ras/Rho guanine nucleotide exchange factor 2	pink	purple
A_33_P3319463	NCOA4	8031	nuclear receptor coactivator 4	yellow	red
A_33_P3304170	PIK3CG	5294	phosphatidylinositol-4,5-bisphosphate 3-kinase catalytic subunit gamma	pink	orange
A_23_P204208	KLRD1	3824	killer cell lectin like receptor D1	salmon	brown
A_33_P3397865	TNNT1	7138	troponin T1, slow skeletal type	brown	cyan
A_23_P123265	SUMF2	25870	sulfatase modifying factor 2	salmon	green
A_23_P115922	EIF4EBP2	1979	eukaryotic translation initiation factor 4E binding protein 2	green	turquoise
A_33_P3238866	SBDS	51119	SBDS, ribosome maturation factor	magenta	darkgrey
A_23_P8013	HIST1H2BL	8340	histone cluster 1 H2B family member l	pink	blue
A_23_P25503	FNDC3A	22862	fibronectin type III domain containing 3A	tan	lightgreen
A_24_P246692	NA	NA	NA	red	tan
A_23_P121253	TNFSF10	8743	TNF superfamily member 10	pink	grey60
A_23_P149678	PIAS3	10401	protein inhibitor of activated STAT 3	brown	darkorange
A_21_P0012676	GK3P	2713	glycerol kinase 3 pseudogene	pink	purple
A_23_P205830	BTBD1	53339	BTB domain containing 1	tan	lightgreen
A_21_P0003243	NA	NA	NA	brown	turquoise
A_19_P00810474	NA	NA	NA	blue	black
A_23_P160787	PEX14	5195	peroxisomal biogenesis factor 14	green	brown
A_24_P280803	NA	NA	NA	red	black
A_33_P3264577	DCTN1	1639	dynactin subunit 1	cyan	blue
A_24_P398432	ARAP1	116985	ArfGAP with RhoGAP domain, ankyrin repeat and PH domain 1	cyan	yellow
A_24_P270460	IFI27	3429	interferon alpha inducible protein 27	red	skyblue
A_23_P91590	RANBP1	5902	RAN binding protein 1	salmon	tan
A_23_P42588	GIMAP5	55340	GTPase, IMAP family member 5	salmon	tan
A_33_P3414242	MOG	4340	myelin oligodendrocyte glycoprotein	black	salmon
A_24_P185314	NAPG	8774	NSF attachment protein gamma	tan	darkgreen
A_24_P92367	YDJC	150223	YdjC chitooligosaccharide deacetylase homolog	brown	darkorange
A_33_P3290924	BAG1	573	BCL2 associated athanogene 1	yellow	darkred
A_23_P104464	ALOX5	240	arachidonate 5-lipoxygenase	pink	purple
A_33_P3400943	CDIP1	29965	cell death inducing p53 target 1	green	brown
A_23_P344037	CHFR	55743	checkpoint with forkhead and ring finger domains	purple	midnightblue
A_24_P97931	CSNK2B	1460	casein kinase 2 beta	cyan	yellow
A_23_P103919	B4GALT3	8703	beta-1,4-galactosyltransferase 3	yellow	darkred
A_21_P0014160	NA	NA	NA	blue	greenyellow
A_23_P97328	C1orf35	79169	chromosome 1 open reading frame 35	green	green
A_33_P3313660	BRD7P3	23629	bromodomain containing 7 pseudogene 3	brown	turquoise
A_23_P14928	COQ9	57017	coenzyme Q9	cyan	tan
A_23_P111811	ING3	54556	inhibitor of growth family member 3	tan	darkgreen
A_23_P105313	EIF2B1	1967	eukaryotic translation initiation factor 2B subunit alpha	greenyellow	grey60
A_24_P97825	CCDC69	26112	coiled-coil domain containing 69	cyan	yellow
A_23_P135326	POLE3	54107	DNA polymerase epsilon 3, accessory subunit	tan	darkturquoise
A_23_P63825	GOT1	2805	glutamic-oxaloacetic transaminase 1	brown	darkorange
A_24_P88554	PEX11B	8799	peroxisomal biogenesis factor 11 beta	brown	brown
A_23_P119102	VASP	7408	vasodilator stimulated phosphoprotein	pink	orange
A_33_P3334895	GRIN2A	2903	glutamate ionotropic receptor NMDA type subunit 2A	black	salmon
A_23_P205529	METTL17	64745	methyltransferase like 17	cyan	tan
A_23_P123905	EXOSC3	51010	exosome component 3	salmon	grey60
A_23_P32233	KLF4	9314	Kruppel like factor 4	pink	yellow
A_23_P501435	KAT14	57325	lysine acetyltransferase 14	green	brown
A_33_P3347040	DPP9-AS1	100131094	DPP9 antisense RNA 1	black	white
A_33_P3265309	CEACAM4	1089	carcinoembryonic antigen related cell adhesion molecule 4	blue	black
A_23_P24104	PLAU	5328	plasminogen activator, urokinase	purple	yellow
A_23_P104892	EIF4G2	1982	eukaryotic translation initiation factor 4 gamma 2	purple	grey60
A_21_P0010562	LOC388692	388692	uncharacterized LOC388692	magenta	darkgrey
A_23_P113572	CD19	930	CD19 molecule	brown	darkgreen
A_33_P3289422	ZNF765	91661	zinc finger protein 765	tan	lightgreen
A_23_P128930	PSMC6	5706	proteasome 26S subunit, ATPase 6	greenyellow	grey60
A_23_P65466	RAB2B	84932	RAB2B, member RAS oncogene family	yellow	greenyellow
A_23_P97365	LRRC8D	55144	leucine rich repeat containing 8 VRAC subunit D	salmon	grey60
A_23_P11995	PRDX1	5052	peroxiredoxin 1	purple	tan
A_23_P113825	NACC2	138151	NACC family member 2	midnightblue	magenta
A_23_P119857	TTC32	130502	tetratricopeptide repeat domain 32	turquoise	royalblue
A_23_P201672	METTL13	51603	methyltransferase like 13	green	green
A_33_P3224819	SLC45A4	57210	solute carrier family 45 member 4	midnightblue	magenta
A_33_P3410724	SDHC	6391	succinate dehydrogenase complex subunit C	greenyellow	darkturquoise
A_21_P0011001	PCSK7	9159	proprotein convertase subtilisin/kexin type 7	cyan	tan
A_21_P0014358	NA	NA	NA	blue	saddlebrown
A_23_P107744	S1PR5	53637	sphingosine-1-phosphate receptor 5	salmon	green
A_33_P3210379	SCGB3A1	92304	secretoglobin family 3A member 1	black	salmon
A_23_P103070	YWHAH	7533	tyrosine 3-monooxygenase/tryptophan 5-monooxygenase activation protein eta	greenyellow	grey60
A_23_P250283	RAB1A	5861	RAB1A, member RAS oncogene family	purple	midnightblue
A_33_P3264419	YTHDF3	253943	YTH N6-methyladenosine RNA binding protein 3	tan	darkgreen
A_23_P209933	TGOLN2	10618	trans-golgi network protein 2	pink	lightyellow
A_23_P129058	USP8	9101	ubiquitin specific peptidase 8	purple	midnightblue
A_23_P108761	CNOT11	55571	CCR4-NOT transcription complex subunit 11	brown	turquoise
A_23_P104689	RELA	5970	RELA proto-oncogene, NF-kB subunit	cyan	yellow
A_23_P302116	PPFIA1	8500	PTPRF interacting protein alpha 1	midnightblue	magenta
A_24_P348989	LILRA1	11024	leukocyte immunoglobulin like receptor A1	blue	purple
A_23_P141180	TOM1L2	146691	target of myb1 like 2 membrane trafficking protein	brown	brown
A_33_P3352407	NA	NA	NA	purple	yellow
A_23_P122041	PPP2CA	5515	protein phosphatase 2 catalytic subunit alpha	greenyellow	grey60
A_23_P79518	IL1B	3553	interleukin 1 beta	midnightblue	lightgreen
A_24_P383330	NA	NA	NA	purple	yellow
A_33_P3257714	RPS23	6228	ribosomal protein S23	turquoise	darkturquoise
A_23_P117225	ERCC5	2073	ERCC excision repair 5, endonuclease	salmon	darkturquoise
A_23_P83159	KLHL9	55958	kelch like family member 9	tan	lightgreen
A_24_P21056	PHF14	9678	PHD finger protein 14	salmon	tan
A_24_P237757	NA	NA	NA	purple	midnightblue
A_23_P113184	FTO	79068	FTO, alpha-ketoglutarate dependent dioxygenase	green	darkorange
A_23_P129829	ORMDL3	94103	ORMDL sphingolipid biosynthesis regulator 3	black	salmon
A_21_P0012591	UGT2B11	10720	UDP glucuronosyltransferase family 2 member B11	blue	greenyellow
A_23_P65830	HDDC3	374659	HD domain containing 3	brown	darkorange
A_23_P154199	PPP1R7	5510	protein phosphatase 1 regulatory subunit 7	cyan	yellow
A_23_P397480	ABCC13	150000	ATP binding cassette subfamily C member 13 (pseudogene)	yellow	darkred
A_21_P0011010	NA	NA	NA	magenta	darkgrey
A_23_P122863	GRB10	2887	growth factor receptor bound protein 10	midnightblue	magenta
A_24_P372562	PTPMT1	114971	protein tyrosine phosphatase, mitochondrial 1	salmon	tan
A_21_P0000682	LHX4-AS1	100527964	LHX4 antisense RNA 1	green	lightcyan
A_23_P216630	SLC44A1	23446	solute carrier family 44 member 1	tan	lightgreen
A_23_P122937	ELMO1	9844	engulfment and cell motility 1	midnightblue	blue
A_23_P415411	HIST1H4E	8367	histone cluster 1 H4 family member e	magenta	darkgrey
A_23_P166910	DNAJC13	23317	DnaJ heat shock protein family (Hsp40) member C13	pink	orange
A_23_P111701	GNG11	2791	G protein subunit gamma 11	yellow	cyan
A_23_P100499	ROGDI	79641	rogdi homolog	cyan	darkred
A_33_P3294222	CARMIL2	146206	capping protein regulator and myosin 1 linker 2	brown	darkorange
A_23_P115316	TOR3A	64222	torsin family 3 member A	cyan	tan
A_32_P147078	SLC8A1	6546	solute carrier family 8 member A1	midnightblue	lightgreen
A_23_P365614	NOTCH4	4855	notch 4	brown	turquoise
A_21_P0009950	NA	NA	NA	blue	greenyellow
A_33_P3272117	ASPSCR1	79058	ASPSCR1, UBX domain containing tether for SLC2A4	cyan	blue
A_24_P309360	TM9SF3	56889	transmembrane 9 superfamily member 3	tan	lightgreen
A_23_P142255	SHD	56961	Src homology 2 domain containing transforming protein D	blue	greenyellow
A_23_P64083	SF3B2	10992	splicing factor 3b subunit 2	cyan	blue
A_32_P22338	PDCD6IP	10015	programmed cell death 6 interacting protein	pink	lightyellow
A_33_P3703501	GALNT10	55568	polypeptide N-acetylgalactosaminyltransferase 10	magenta	turquoise
A_23_P158297	BTNL3	10917	butyrophilin like 3	salmon	magenta
A_23_P250455	HDAC6	10013	histone deacetylase 6	brown	darkorange
A_23_P116765	LALBA	3906	lactalbumin alpha	blue	greenyellow
A_23_P74547	CD53	963	CD53 molecule	purple	yellow
A_32_P175934	CD48	962	CD48 molecule	purple	midnightblue
A_32_P114284	IKZF2	22807	IKAROS family zinc finger 2	tan	darkgreen
A_23_P252082	TMEM176A	55365	transmembrane protein 176A	midnightblue	greenyellow
A_23_P110196	HERC5	51191	HECT and RLD domain containing E3 ubiquitin protein ligase 5	cyan	skyblue
A_23_P12329	APH1A	51107	aph-1 homolog A, gamma-secretase subunit	brown	turquoise
A_24_P329635	TSC1	7248	TSC complex subunit 1	red	lightcyan
A_33_P3359160	FAM189B	10712	family with sequence similarity 189 member B	brown	turquoise
A_23_P411113	CNTNAP1	8506	contactin associated protein 1	black	salmon
A_23_P39561	UBE2F	140739	ubiquitin conjugating enzyme E2 F (putative)	purple	darkred
A_23_P77568	EIF3C	8663	eukaryotic translation initiation factor 3 subunit C	green	brown
A_23_P145777	NDUFA4	4697	NDUFA4, mitochondrial complex associated	turquoise	royalblue
A_23_P203173	IL10RA	3587	interleukin 10 receptor subunit alpha	green	green
A_24_P179351	TPT1	7178	tumor protein, translationally-controlled 1	salmon	midnightblue
A_23_P115137	LAMTOR5	10542	late endosomal/lysosomal adaptor, MAPK and MTOR activator 5	turquoise	royalblue
A_23_P11025	ZNF185	7739	zinc finger protein 185 with LIM domain	pink	purple
A_33_P3358908	KRTAP9-6	100507608	keratin associated protein 9-6	blue	white
A_21_P0006548	NA	NA	NA	purple	midnightblue
A_19_P00329711	MAVS	57506	mitochondrial antiviral signaling protein	blue	greenyellow
A_21_P0000163	RNF223	401934	ring finger protein 223	blue	salmon
A_23_P203488	SMPD1	6609	sphingomyelin phosphodiesterase 1	cyan	yellow
A_33_P3401252	NA	NA	NA	red	pink
A_23_P118406	CYBC1	79415	cytochrome b-245 chaperone 1	purple	midnightblue
A_33_P3271445	COL4A3BP	10087	collagen type IV alpha 3 binding protein	midnightblue	lightcyan
A_24_P361167	CHD8	57680	chromodomain helicase DNA binding protein 8	magenta	darkorange
A_33_P3393170	CAPN5	726	calpain 5	brown	turquoise
A_33_P3325935	PQBP1	10084	polyglutamine binding protein 1	black	salmon
A_23_P401076	SUSD3	203328	sushi domain containing 3	salmon	darkturquoise
A_32_P102062	FOXO3	2309	forkhead box O3	yellow	red
A_23_P102965	BCL2L13	23786	BCL2 like 13	yellow	red
A_23_P56314	UQCR11	10975	ubiquinol-cytochrome c reductase, complex III subunit XI	turquoise	royalblue
A_21_P0000033	ANKRD66	100287718	ankyrin repeat domain 66	blue	white
A_33_P3323607	NA	NA	NA	black	greenyellow
A_33_P3356910	TCEAL6	158931	transcription elongation factor A like 6	green	brown
A_23_P136683	HLA-DQB1	3119	major histocompatibility complex, class II, DQ beta 1	blue	midnightblue
A_23_P215819	ZNF655	79027	zinc finger protein 655	tan	darkgreen
A_23_P120710	TTC3	7267	tetratricopeptide repeat domain 3	salmon	green
A_21_P0011530	ABHD17A	81926	abhydrolase domain containing 17A	purple	yellow
A_23_P12173	CRTC2	200186	CREB regulated transcription coactivator 2	pink	blue
A_33_P3324137	NA	NA	NA	pink	orange
A_33_P3336484	NPIPA5	100288332	nuclear pore complex interacting protein family member A5	magenta	lightyellow
A_23_P114466	TBL1Y	90665	transducin beta like 1 Y-linked	midnightblue	turquoise
A_24_P365767	CYBB	1536	cytochrome b-245 beta chain	tan	lightgreen
A_23_P98431	HMBS	3145	hydroxymethylbilane synthase	yellow	red
A_23_P164141	PSME3	10197	proteasome activator subunit 3	cyan	blue
A_23_P129221	FAH	2184	fumarylacetoacetate hydrolase	cyan	darkred
A_33_P3358641	LRRFIP1	9208	LRR binding FLII interacting protein 1	magenta	magenta
A_21_P0013477	NA	NA	NA	red	black
A_23_P251342	GSK3B	2932	glycogen synthase kinase 3 beta	purple	yellow
A_24_P6911	DTX2P1-UPK3BP1-PMS2P11	441263	DTX2P1-UPK3BP1-PMS2P11 readthrough, transcribed pseudogene	salmon	lightyellow
A_23_P93690	MCM7	4176	minichromosome maintenance complex component 7	salmon	green
A_23_P20722	SNAPC4	6621	small nuclear RNA activating complex polypeptide 4	green	brown
A_23_P112201	KDM4C	23081	lysine demethylase 4C	greenyellow	grey60
A_23_P108641	FAM136A	84908	family with sequence similarity 136 member A	tan	darkgreen
A_33_P3223397	NA	NA	NA	black	salmon
A_32_P8251	PHRF1	57661	PHD and ring finger domains 1	green	darkturquoise
A_33_P3436646	NA	NA	NA	red	lightcyan
A_33_P3271171	NA	NA	NA	black	salmon
A_23_P117424	DCAF11	80344	DDB1 and CUL4 associated factor 11	yellow	darkred
A_23_P205575	GPR135	64582	G protein-coupled receptor 135	magenta	darkgrey
A_33_P3367855	PIK3R2	5296	phosphoinositide-3-kinase regulatory subunit 2	yellow	red
A_23_P300600	NEFH	4744	neurofilament heavy	green	turquoise
A_33_P3350748	KRT7	3855	keratin 7	black	salmon
A_23_P380917	SEC11A	23478	SEC11 homolog A, signal peptidase complex subunit	turquoise	lightgreen
A_23_P84154	ARHGAP15	55843	Rho GTPase activating protein 15	purple	midnightblue
A_23_P145146	PDCD2	5134	programmed cell death 2	greenyellow	darkturquoise
A_23_P141126	GALK1	2584	galactokinase 1	midnightblue	blue
A_23_P104146	ZMYM4	9202	zinc finger MYM-type containing 4	salmon	darkturquoise
A_23_P138631	SMC3	9126	structural maintenance of chromosomes 3	greenyellow	grey60
A_33_P3352767	MC1R	4157	melanocortin 1 receptor	brown	brown
A_33_P3229027	RELL2	285613	RELT like 2	brown	turquoise
A_21_P0007869	NA	NA	NA	brown	turquoise
A_33_P3318027	CSNK2B	1460	casein kinase 2 beta	cyan	yellow
A_24_P53519	CHAF1A	10036	chromatin assembly factor 1 subunit A	brown	turquoise
A_24_P84428	CACYBP	27101	calcyclin binding protein	magenta	darkgrey
A_23_P205686	PSEN1	5663	presenilin 1	purple	purple
A_21_P0014502	NA	NA	NA	brown	turquoise
A_33_P3376434	SETD5	55209	SET domain containing 5	purple	yellow
A_24_P22746	ZADH2	284273	zinc binding alcohol dehydrogenase domain containing 2	salmon	grey60
A_33_P3271051	CYTH3	9265	cytohesin 3	brown	turquoise
A_23_P40039	AMMECR1L	83607	AMMECR1 like	tan	darkgreen
A_24_P410627	MKRN1	23608	makorin ring finger protein 1	yellow	red
A_23_P121095	TOP2B	7155	DNA topoisomerase II beta	greenyellow	grey60
A_21_P0010098	NA	NA	NA	blue	greenyellow
A_23_P142750	EIF2AK2	5610	eukaryotic translation initiation factor 2 alpha kinase 2	pink	skyblue
A_23_P122233	MRPL22	29093	mitochondrial ribosomal protein L22	turquoise	royalblue
A_32_P8015	HNRNPA1L2	144983	heterogeneous nuclear ribonucleoprotein A1-like 2	salmon	grey60
A_33_P3315763	NA	NA	NA	purple	lightyellow
A_33_P3258593	PRB1	5542	proline rich protein BstNI subfamily 1	black	salmon
A_24_P390928	TRAPPC6A	79090	trafficking protein particle complex 6A	cyan	tan
A_23_P205768	ARPP19	10776	cAMP regulated phosphoprotein 19	tan	lightgreen
A_24_P59247	NA	NA	NA	red	midnightblue
A_33_P3217998	AKR7L	246181	aldo-keto reductase family 7 like (gene/pseudogene)	blue	green
A_23_P53957	COX16	51241	COX16, cytochrome c oxidase assembly homolog	turquoise	royalblue
A_32_P58074	RPS3A	6189	ribosomal protein S3A	turquoise	royalblue
A_23_P120845	XBP1	7494	X-box binding protein 1	salmon	tan
A_33_P3397051	EXOC8	149371	exocyst complex component 8	magenta	turquoise
A_23_P216689	BRD3	8019	bromodomain containing 3	purple	yellow
A_24_P941505	FAM120A	23196	family with sequence similarity 120A	purple	grey60
A_19_P00318189	LOC401320	401320	uncharacterized LOC401320	purple	tan
A_24_P272451	NA	NA	NA	purple	midnightblue
A_23_P31671	UQCRB	7381	ubiquinol-cytochrome c reductase binding protein	turquoise	royalblue
A_33_P3232557	DLGAP3	58512	DLG associated protein 3	brown	turquoise
A_21_P0008919	NA	NA	NA	red	black
A_23_P117037	LETMD1	25875	LETM1 domain containing 1	salmon	tan
A_23_P8339	MRPL18	29074	mitochondrial ribosomal protein L18	salmon	tan
A_23_P323685	HIST1H4H	8365	histone cluster 1 H4 family member h	magenta	turquoise
A_33_P3364289	HSH2D	84941	hematopoietic SH2 domain containing	blue	greenyellow
A_24_P113686	ZNHIT6	54680	zinc finger HIT-type containing 6	salmon	tan
A_23_P119196	KLF2	10365	Kruppel like factor 2	green	darkturquoise
A_21_P0000061	CGREF1	10669	cell growth regulator with EF-hand domain 1	blue	greenyellow
A_23_P28169	ARL6IP6	151188	ADP ribosylation factor like GTPase 6 interacting protein 6	greenyellow	grey60
A_23_P102832	CEP250	11190	centrosomal protein 250	brown	darkorange
A_23_P315286	R3HDM4	91300	R3H domain containing 4	yellow	darkred
A_23_P3775	OGFOD1	55239	2-oxoglutarate and iron dependent oxygenase domain containing 1	brown	turquoise
A_23_P110433	PPWD1	23398	peptidylprolyl isomerase domain and WD repeat containing 1	tan	darkgreen
A_32_P64038	NA	NA	NA	brown	turquoise
A_32_P53486	BOLA2B	654483	bolA family member 2B	brown	brown
A_23_P126613	AQP10	89872	aquaporin 10	brown	cyan
A_23_P61426	MSRA	4482	methionine sulfoxide reductase A	midnightblue	magenta
A_32_P194072	TECPR1	25851	tectonin beta-propeller repeat containing 1	brown	darkorange
A_23_P114164	UBQLN2	29978	ubiquilin 2	greenyellow	lightgreen
A_23_P10873	TLR1	7096	toll like receptor 1	pink	lightgreen
A_23_P201086	ARF1	375	ADP ribosylation factor 1	purple	yellow
A_23_P12874	GTPBP4	23560	GTP binding protein 4	greenyellow	darkturquoise
A_21_P0013456	NA	NA	NA	purple	orange
A_23_P37005	MTRF1	9617	mitochondrial translation release factor 1	tan	darkgreen
A_33_P3227252	NA	NA	NA	blue	greenyellow
A_32_P199301	TFDP1	7027	transcription factor Dp-1	yellow	darkred
A_23_P123672	TDRD7	23424	tudor domain containing 7	tan	skyblue
A_23_P106859	EMC8	10328	ER membrane protein complex subunit 8	green	brown
A_23_P148737	MYBPH	4608	myosin binding protein H	magenta	darkorange
A_23_P206760	HP	3240	haptoglobin	midnightblue	darkgreen
A_33_P3877728	NA	NA	NA	brown	darkorange
A_23_P11262	F8A1	8263	coagulation factor VIII associated 1	cyan	pink
A_23_P145330	CCHCR1	54535	coiled-coil alpha-helical rod protein 1	blue	saddlebrown
A_33_P3295283	LPCAT3	10162	lysophosphatidylcholine acyltransferase 3	midnightblue	turquoise
A_23_P168868	PTDSS1	9791	phosphatidylserine synthase 1	brown	darkorange
A_23_P377214	HEXIM2	124790	hexamethylene bisacetamide inducible 2	magenta	cyan
A_33_P3407638	ARL14EP	120534	ADP ribosylation factor like GTPase 14 effector protein	turquoise	darkgreen
A_23_P67932	CXCR1	3577	C-X-C motif chemokine receptor 1	pink	purple
A_19_P00317082	HCG18	414777	HLA complex group 18 (non-protein coding)	green	lightcyan
A_23_P22765	NDUFB11	54539	NADH:ubiquinone oxidoreductase subunit B11	salmon	green
A_21_P0012112	NA	NA	NA	salmon	green
A_23_P120194	ORMDL1	94101	ORMDL sphingolipid biosynthesis regulator 1	tan	darkgreen
A_23_P59349	HECA	51696	hdc homolog, cell cycle regulator	tan	lightgreen
A_33_P3225567	TRMT2B	79979	tRNA methyltransferase 2 homolog B	red	darkgrey
A_19_P00321230	LOC202181	202181	SUMO interacting motifs containing 1 pseudogene	purple	yellow
A_23_P111672	TES	26136	testin LIM domain protein	tan	darkturquoise
A_33_P3328511	ARL17B	100506084	ADP ribosylation factor like GTPase 17B	magenta	darkgrey
A_23_P418493	ATPAF2	91647	ATP synthase mitochondrial F1 complex assembly factor 2	cyan	blue
A_33_P3360675	PRKAR1B	5575	protein kinase cAMP-dependent type I regulatory subunit beta	magenta	darkorange
A_23_P217028	USP20	10868	ubiquitin specific peptidase 20	salmon	green
A_33_P3285038	CERS5	91012	ceramide synthase 5	brown	turquoise
A_33_P3243343	NA	NA	NA	purple	midnightblue
A_21_P0010303	NA	NA	NA	blue	greenyellow
A_21_P0011656	NA	NA	NA	magenta	darkgrey
A_33_P3344618	TFEB	7942	transcription factor EB	black	salmon
A_23_P27840	SUPT5H	6829	SPT5 homolog, DSIF elongation factor subunit	cyan	blue
A_23_P76969	SIPA1L1	26037	signal induced proliferation associated 1 like 1	midnightblue	magenta
A_33_P3391429	ZNF672	79894	zinc finger protein 672	cyan	yellow
A_33_P3330109	HLA-C	3107	major histocompatibility complex, class I, C	red	midnightblue
A_33_P3355055	ARL6IP4	51329	ADP ribosylation factor like GTPase 6 interacting protein 4	cyan	tan
A_23_P70095	CD74	972	CD74 molecule	cyan	yellow
A_23_P114952	TMEM9	252839	transmembrane protein 9	turquoise	darkorange
A_21_P0007158	NA	NA	NA	brown	turquoise
A_23_P109442	HPS4	89781	HPS4, biogenesis of lysosomal organelles complex 3 subunit 2	green	darkgreen
A_23_P164022	MYO1C	4641	myosin IC	purple	midnightblue
A_23_P3042	PPP2R5E	5529	protein phosphatase 2 regulatory subunit B'epsilon	greenyellow	lightgreen
A_24_P331904	COMMD4	54939	COMM domain containing 4	green	brown
A_24_P97374	EOMES	8320	eomesodermin	salmon	tan
A_23_P110062	EIF2B5	8893	eukaryotic translation initiation factor 2B subunit epsilon	cyan	tan
A_23_P11295	CMC4	100272147	C-X9-C motif containing 4	turquoise	brown
A_23_P121716	ANXA3	306	annexin A3	pink	purple
A_24_P927474	NA	NA	NA	purple	midnightblue
A_21_P0013818	NA	NA	NA	blue	greenyellow
A_23_P397376	MAF	4094	MAF bZIP transcription factor	green	brown
A_33_P3312877	CCDC107	203260	coiled-coil domain containing 107	brown	brown
A_33_P3259253	CD28	940	CD28 molecule	blue	greenyellow
A_33_P3286973	NA	NA	NA	blue	white
A_33_P3220437	TNFAIP8L1	126282	TNF alpha induced protein 8 like 1	red	black
A_33_P3356607	WIPI2	26100	WD repeat domain, phosphoinositide interacting 2	cyan	blue
A_23_P217917	GSTM4	2948	glutathione S-transferase mu 4	cyan	yellow
A_23_P201790	PPP1R12B	4660	protein phosphatase 1 regulatory subunit 12B	pink	purple
A_24_P418044	HLA-J	3137	major histocompatibility complex, class I, J (pseudogene)	purple	yellow
A_23_P205074	SLC46A3	283537	solute carrier family 46 member 3	magenta	darkgrey
A_23_P3453	RPAP1	26015	RNA polymerase II associated protein 1	brown	darkorange
A_23_P211738	UBP1	7342	upstream binding protein 1	tan	lightgreen
A_23_P26468	RHBDL1	9028	rhomboid like 1	blue	white
A_23_P121702	OCIAD2	132299	OCIA domain containing 2	turquoise	darkturquoise
A_24_P417352	NA	NA	NA	cyan	yellow
A_23_P103503	MDM4	4194	MDM4, p53 regulator	pink	lightyellow
A_33_P3216427	DGKQ	1609	diacylglycerol kinase theta	brown	brown
A_23_P211212	COL18A1	80781	collagen type XVIII alpha 1 chain	midnightblue	magenta
A_23_P500773	MAP3K7	6885	mitogen-activated protein kinase kinase kinase 7	greenyellow	grey60
A_21_P0007934	NA	NA	NA	purple	midnightblue
A_33_P3865368	LOC254896	254896	uncharacterized LOC254896	pink	purple
A_23_P162386	BIN2	51411	bridging integrator 2	purple	midnightblue
A_19_P00316659	SNHG5	387066	small nucleolar RNA host gene 5	green	darkturquoise
A_19_P00315529	NA	NA	NA	magenta	darkgrey
A_32_P47701	EEF1A1	1915	eukaryotic translation elongation factor 1 alpha 1	purple	midnightblue
A_23_P210920	GSS	2937	glutathione synthetase	brown	green
A_23_P255805	ZNF7	7553	zinc finger protein 7	greenyellow	darkturquoise
A_23_P202658	GSTP1	2950	glutathione S-transferase pi 1	green	green
A_23_P51660	MUTYH	4595	mutY DNA glycosylase	brown	brown
A_33_P3278826	NA	NA	NA	blue	white
A_23_P126908	TNFRSF14	8764	TNF receptor superfamily member 14	red	lightcyan
A_33_P3293734	NA	NA	NA	black	green
A_19_P00317984	SNHG5	387066	small nucleolar RNA host gene 5	turquoise	darkturquoise
A_23_P144054	PRKCD	5580	protein kinase C delta	cyan	yellow
A_23_P104942	TMX2	51075	thioredoxin related transmembrane protein 2	brown	brown
A_24_P322369	VPS4B	9525	vacuolar protein sorting 4 homolog B	greenyellow	grey60
A_32_P121303	NUP50	10762	nucleoporin 50	tan	lightgreen
A_23_P57941	RBM6	10180	RNA binding motif protein 6	magenta	darkorange
A_24_P880043	PCGF5	84333	polycomb group ring finger 5	tan	lightgreen
A_33_P3263027	NA	NA	NA	blue	greenyellow
A_23_P256021	LAS1L	81887	LAS1 like, ribosome biogenesis factor	green	darkorange
A_24_P233917	EFCAB14	9813	EF-hand calcium binding domain 14	greenyellow	grey60
A_33_P3271111	NINJ1	4814	ninjurin 1	midnightblue	magenta
A_33_P3390853	NA	NA	NA	brown	brown
A_32_P70724	KDM5B	10765	lysine demethylase 5B	midnightblue	magenta
A_33_P3358099	CD300E	342510	CD300e molecule	pink	skyblue
A_23_P254353	NOXA1	10811	NADPH oxidase activator 1	brown	darkorange
A_24_P401100	NA	NA	NA	purple	tan
A_23_P210608	ZNF217	7764	zinc finger protein 217	pink	grey60
A_23_P206532	PHKB	5257	phosphorylase kinase regulatory subunit beta	greenyellow	grey60
A_21_P0011120	PARP4	143	poly(ADP-ribose) polymerase family member 4	greenyellow	grey60
A_23_P112061	HGSNAT	138050	heparan-alpha-glucosaminide N-acetyltransferase	green	lightcyan
A_33_P3235330	MTMR3	8897	myotubularin related protein 3	midnightblue	magenta
A_33_P3351529	NA	NA	NA	turquoise	royalblue
A_23_P91350	GPCPD1	56261	glycerophosphocholine phosphodiesterase 1	midnightblue	lightcyan
A_23_P127721	P2RX3	5024	purinergic receptor P2X 3	black	salmon
A_23_P111481	SRRT	51593	serrate, RNA effector molecule	green	brown
A_23_P103149	ACO2	50	aconitase 2	green	darkorange
A_33_P3351249	CXCL16	58191	C-X-C motif chemokine ligand 16	midnightblue	magenta
A_33_P3339011	NA	NA	NA	green	brown
A_24_P79054	TGFB1	7040	transforming growth factor beta 1	cyan	blue
A_23_P107735	CD79A	973	CD79a molecule	black	salmon
A_33_P3212490	DICER1	23405	dicer 1, ribonuclease III	tan	lightgreen
A_23_P255523	ALKBH4	54784	alkB homolog 4, lysine demethylase	brown	darkorange
A_23_P3911	PLXDC1	57125	plexin domain containing 1	brown	brown
A_23_P307430	LSM12	124801	LSM12 homolog	cyan	yellow
A_33_P3321657	HSPG2	3339	heparan sulfate proteoglycan 2	black	salmon
A_23_P428382	AFTPH	54812	aftiphilin	purple	yellow
A_24_P400997	SMCHD1	23347	structural maintenance of chromosomes flexible hinge domain containing 1	purple	midnightblue
A_23_P121885	ROPN1L	83853	rhophilin associated tail protein 1 like	pink	purple
A_23_P431939	MR1	3140	major histocompatibility complex, class I-related	cyan	skyblue
A_23_P122906	AUTS2	26053	AUTS2, activator of transcription and developmental regulator	green	darkgreen
A_21_P0013977	NA	NA	NA	salmon	lightyellow
A_23_P109677	NA	NA	NA	red	black
A_33_P3327245	SETDB2	83852	SET domain bifurcated 2	salmon	tan
A_33_P3297611	NA	NA	NA	blue	greenyellow
A_23_P382043	NT5DC1	221294	5'-nucleotidase domain containing 1	tan	darkgreen
A_33_P3229083	HIST1H2BK	85236	histone cluster 1 H2B family member k	purple	yellow
A_23_P211522	SYNGR1	9145	synaptogyrin 1	cyan	tan
A_33_P3233953	NA	NA	NA	red	lightcyan
A_23_P35045	ARHGAP30	257106	Rho GTPase activating protein 30	cyan	yellow
A_23_P250413	PARVG	64098	parvin gamma	cyan	yellow
A_23_P396062	RAB40C	57799	RAB40C, member RAS oncogene family	cyan	yellow
A_23_P201047	THBS3	7059	thrombospondin 3	midnightblue	darkorange
A_23_P2423	MAGOHB	55110	mago homolog B, exon junction complex core component	turquoise	darkgreen
A_19_P00802936	BRK1	55845	BRICK1, SCAR/WAVE actin nucleating complex subunit	turquoise	royalblue
A_23_P109768	RNF7	9616	ring finger protein 7	turquoise	royalblue
A_32_P184279	CCDC6	8030	coiled-coil domain containing 6	tan	lightgreen
A_21_P0006055	NA	NA	NA	black	salmon
A_33_P3256695	PRPF40A	55660	pre-mRNA processing factor 40 homolog A	green	lightcyan
A_33_P3300142	ANKFY1	51479	ankyrin repeat and FYVE domain containing 1	blue	greenyellow
A_23_P123330	RPL30	6156	ribosomal protein L30	turquoise	royalblue
A_23_P110492	MARCH6	10299	membrane associated ring-CH-type finger 6	green	darkgrey
A_23_P362191	LINC00324	284029	long intergenic non-protein coding RNA 324	purple	tan
A_23_P153286	ZNF234	10780	zinc finger protein 234	green	brown
A_23_P202708	MADD	8567	MAP kinase activating death domain	cyan	yellow
A_23_P2474	COPS7A	50813	COP9 signalosome subunit 7A	cyan	yellow
A_23_P99027	PTPN11	5781	protein tyrosine phosphatase, non-receptor type 11	purple	midnightblue
A_23_P92281	GTPBP8	29083	GTP binding protein 8 (putative)	green	darkturquoise
A_33_P3224020	NA	NA	NA	black	greenyellow
A_23_P59481	UBE3C	9690	ubiquitin protein ligase E3C	brown	brown
A_33_P3224680	NA	NA	NA	salmon	grey60
A_21_P0007638	NA	NA	NA	blue	greenyellow
A_21_P0012880	NA	NA	NA	black	salmon
A_24_P295590	RASSF4	83937	Ras association domain family member 4	purple	grey60
A_33_P3280066	CAVIN1	284119	caveolae associated protein 1	red	midnightblue
A_33_P3257312	ATG2A	23130	autophagy related 2A	midnightblue	magenta
A_23_P104741	KIRREL3	84623	kirre like nephrin family adhesion molecule 3	blue	greenyellow
A_23_P164000	SENP3	26168	SUMO specific peptidase 3	cyan	tan
A_23_P17512	DTD1	92675	D-tyrosyl-tRNA deacylase 1	green	turquoise
A_33_P3287113	NA	NA	NA	blue	white
A_33_P3283061	NA	NA	NA	black	salmon
A_23_P257503	HERC1	8925	HECT and RLD domain containing E3 ubiquitin protein ligase family member 1	greenyellow	lightgreen
A_32_P51084	NUP205	23165	nucleoporin 205	green	brown
A_24_P389517	HNRNPK	3190	heterogeneous nuclear ribonucleoprotein K	purple	yellow
A_23_P12343	GSTM3	2947	glutathione S-transferase mu 3	brown	brown
A_23_P162127	CCDC90B	60492	coiled-coil domain containing 90B	tan	darkgreen
A_24_P81841	CDKN1B	1027	cyclin dependent kinase inhibitor 1B	greenyellow	grey60
A_33_P3290909	SMC1A	8243	structural maintenance of chromosomes 1A	magenta	darkgrey
A_23_P204087	OAS2	4939	2'-5'-oligoadenylate synthetase 2	cyan	skyblue
A_23_P10559	AATK	9625	apoptosis associated tyrosine kinase	midnightblue	magenta
A_23_P78122	MYO18A	399687	myosin XVIIIA	cyan	blue
A_23_P137586	GMEB1	10691	glucocorticoid modulatory element binding protein 1	cyan	blue
A_23_P83175	HACD4	401494	3-hydroxyacyl-CoA dehydratase 4	purple	midnightblue
A_23_P218997	PDCD6	10016	programmed cell death 6	greenyellow	grey60
A_23_P147109	TOR4A	54863	torsin family 4 member A	cyan	blue
A_23_P350074	SYNE4	163183	spectrin repeat containing nuclear envelope family member 4	brown	turquoise
A_23_P106562	GALNS	2588	galactosamine (N-acetyl)-6-sulfatase	cyan	purple
A_23_P78209	MAFG	4097	MAF bZIP transcription factor G	brown	turquoise
A_23_P122228	NDUFS6	4726	NADH:ubiquinone oxidoreductase subunit S6	salmon	tan
A_23_P117506	DHRS7	51635	dehydrogenase/reductase 7	purple	midnightblue
A_23_P99424	TPP2	7174	tripeptidyl peptidase 2	green	darkgreen
A_23_P150852	ESYT1	23344	extended synaptotagmin 1	cyan	lightyellow
A_33_P3267305	ANKRD52	283373	ankyrin repeat domain 52	brown	darkorange
A_23_P112289	TMOD1	7111	tropomodulin 1	yellow	darkred
A_23_P109345	PTTG1IP	754	PTTG1 interacting protein	greenyellow	grey60
A_21_P0000102	MTRNR2L2	100462981	MT-RNR2 like 2	red	midnightblue
A_23_P155103	ADSL	158	adenylosuccinate lyase	purple	midnightblue
A_33_P3277943	CNOT6L	246175	CCR4-NOT transcription complex subunit 6 like	purple	grey60
A_33_P3407675	TIPRL	261726	TOR signaling pathway regulator	purple	yellow
A_21_P0007502	LINC00173	100287569	long intergenic non-protein coding RNA 173	blue	white
A_19_P00800244	NA	NA	NA	blue	greenyellow
A_23_P22499	GNL3L	54552	G protein nucleolar 3 like	purple	darkred
A_24_P69439	SLC25A32	81034	solute carrier family 25 member 32	tan	darkgreen
A_23_P11353	ATP6AP2	10159	ATPase H+ transporting accessory protein 2	green	magenta
A_23_P137532	PLOD1	5351	procollagen-lysine,2-oxoglutarate 5-dioxygenase 1	cyan	blue
A_32_P857658	RPLP1	6176	ribosomal protein lateral stalk subunit P1	salmon	tan
A_23_P200443	SHC1	6464	SHC adaptor protein 1	cyan	blue
A_32_P8402	SYNCRIP	10492	synaptotagmin binding cytoplasmic RNA interacting protein	red	darkgrey
A_23_P108501	EPHA4	2043	EPH receptor A4	green	darkgrey
A_23_P12189	DFFA	1676	DNA fragmentation factor subunit alpha	brown	turquoise
A_23_P107036	TMEM11	8834	transmembrane protein 11	green	magenta
A_33_P3310780	CTTN	2017	cortactin	yellow	cyan
A_23_P101237	C18orf21	83608	chromosome 18 open reading frame 21	purple	midnightblue
A_19_P00321743	NA	NA	NA	magenta	cyan
A_24_P364087	SERGEF	26297	secretion regulating guanine nucleotide exchange factor	red	brown
A_23_P92642	ANKHD1	54882	ankyrin repeat and KH domain containing 1	pink	yellow
A_33_P3405754	NA	NA	NA	blue	greenyellow
A_23_P165148	ILVBL	10994	ilvB acetolactate synthase like	brown	green
A_23_P78092	EVI2A	2123	ecotropic viral integration site 2A	purple	grey60
A_23_P31903	VPS28	51160	VPS28, ESCRT-I subunit	brown	darkorange
A_24_P278367	ACTR1A	10121	ARP1 actin related protein 1 homolog A	cyan	blue
A_24_P915007	NACC1	112939	nucleus accumbens associated 1	brown	lightcyan
A_33_P3346098	TAOK2	9344	TAO kinase 2	black	salmon
A_23_P122815	CALU	813	calumenin	brown	turquoise
A_23_P201287	KIF1B	23095	kinesin family member 1B	pink	purple
A_23_P304991	HLCS	3141	holocarboxylase synthetase	brown	brown
A_33_P3246318	RBX1	9978	ring-box 1	turquoise	royalblue
A_23_P64669	ZCCHC8	55596	zinc finger CCHC-type containing 8	green	darkturquoise
A_23_P92948	PRRC1	133619	proline rich coiled-coil 1	purple	yellow
A_33_P3327058	ARHGEF2	9181	Rho/Rac guanine nucleotide exchange factor 2	pink	orange
A_33_P3416231	HOXA9	3205	homeobox A9	black	salmon
A_21_P0011381	GOLGA6L4	643707	golgin A6 family-like 4	salmon	tan
A_23_P144959	VCAN	1462	versican	pink	purple
A_23_P94591	TMEM141	85014	transmembrane protein 141	brown	turquoise
A_23_P218086	TPCN1	53373	two pore segment channel 1	green	brown
A_32_P84369	FAM153C	653316	family with sequence similarity 153 member C	red	green
A_33_P3360886	NA	NA	NA	black	salmon
A_24_P372048	YKT6	10652	YKT6 v-SNARE homolog	cyan	yellow
A_23_P16538	ELL	8178	elongation factor for RNA polymerase II	cyan	yellow
A_21_P0014385	NA	NA	NA	brown	turquoise
A_23_P101707	PLIN3	10226	perilipin 3	midnightblue	magenta
A_23_P49816	ADAP2	55803	ArfGAP with dual PH domains 2	midnightblue	darkorange
A_23_P122532	C6orf47	57827	chromosome 6 open reading frame 47	green	darkgrey
A_33_P3229863	LINC02346	100128714	long intergenic non-protein coding RNA 2346	blue	white
A_33_P3239287	CHD3	1107	chromodomain helicase DNA binding protein 3	brown	darkorange
A_32_P54544	CCT6A	908	chaperonin containing TCP1 subunit 6A	purple	grey60
A_21_P0010879	NA	NA	NA	purple	lightyellow
A_33_P3253501	HIST2H2BF	440689	histone cluster 2 H2B family member f	blue	orange
A_23_P114414	LONRF3	79836	LON peptidase N-terminal domain and ring finger 3	blue	greenyellow
A_33_P3245620	NA	NA	NA	black	saddlebrown
A_33_P3367565	FNBP1	23048	formin binding protein 1	green	darkgrey
A_33_P3291329	NA	NA	NA	black	salmon
A_23_P107801	C19orf44	84167	chromosome 19 open reading frame 44	black	saddlebrown
A_23_P77328	GCHFR	2644	GTP cyclohydrolase I feedback regulator	turquoise	green
A_32_P96807	RC3H1	149041	ring finger and CCCH-type domains 1	greenyellow	grey60
A_33_P3389394	RPPH1	85495	ribonuclease P RNA component H1	magenta	turquoise
A_33_P3306545	EIF4G2	1982	eukaryotic translation initiation factor 4 gamma 2	purple	midnightblue
A_23_P102842	NFS1	9054	NFS1, cysteine desulfurase	green	darkturquoise
A_33_P3230264	GPC3	2719	glypican 3	black	salmon
A_23_P29939	SNCA	6622	synuclein alpha	yellow	darkred
A_23_P121141	ASTE1	28990	asteroid homolog 1	purple	tan
A_23_P161424	PLXDC2	84898	plexin domain containing 2	pink	purple
A_21_P0008624	NA	NA	NA	black	salmon
A_23_P33894	MAGED2	10916	MAGE family member D2	cyan	lightyellow
A_23_P114826	MRPS15	64960	mitochondrial ribosomal protein S15	turquoise	tan
A_23_P117582	JDP2	122953	Jun dimerization protein 2	midnightblue	magenta
A_23_P78664	DDX39A	10212	DExD-box helicase 39A	brown	green
A_33_P3362631	GUF1	60558	GUF1 homolog, GTPase	green	lightcyan
A_23_P64860	SELPLG	6404	selectin P ligand	cyan	blue
A_23_P97064	FBXO6	26270	F-box protein 6	cyan	skyblue
A_33_P3222045	EEF2KMT	196483	eukaryotic elongation factor 2 lysine methyltransferase	black	darkorange
A_23_P37441	B2M	567	beta-2-microglobulin	purple	midnightblue
A_23_P106241	TRIP11	9321	thyroid hormone receptor interactor 11	green	brown
A_23_P7941	MRPL2	51069	mitochondrial ribosomal protein L2	brown	turquoise
A_33_P3369258	FGFR1OP2	26127	FGFR1 oncogene partner 2	yellow	darkred
A_23_P37910	MAPK3	5595	mitogen-activated protein kinase 3	cyan	yellow
A_33_P3388501	CHIT1	1118	chitinase 1	black	salmon
A_33_P3353343	SRRM2	23524	serine/arginine repetitive matrix 2	magenta	turquoise
A_23_P24375	OTUB1	55611	OTU deubiquitinase, ubiquitin aldehyde binding 1	cyan	blue
A_32_P145153	RPL31	6160	ribosomal protein L31	turquoise	royalblue
A_24_P187651	CLN3	1201	CLN3, battenin	cyan	lightyellow
A_23_P139297	TRIM44	54765	tripartite motif containing 44	purple	yellow
A_23_P114656	HDAC1	3065	histone deacetylase 1	salmon	green
A_23_P422071	B3GALT4	8705	beta-1,3-galactosyltransferase 4	green	brown
A_21_P0011791	NA	NA	NA	blue	greenyellow
A_23_P26704	MFSD11	79157	major facilitator superfamily domain containing 11	greenyellow	grey60
A_23_P101683	CLC	1178	Charcot-Leyden crystal galectin	turquoise	black
A_33_P3220390	NA	NA	NA	purple	lightyellow
A_23_P100602	TBCD	6904	tubulin folding cofactor D	purple	yellow
A_23_P77066	SNRPN	6638	small nuclear ribonucleoprotein polypeptide N	purple	yellow
A_23_P387552	RARG	5916	retinoic acid receptor gamma	black	salmon
A_24_P146211	HIST1H2BD	3017	histone cluster 1 H2B family member d	purple	yellow
A_33_P3309526	PTPRC	5788	protein tyrosine phosphatase, receptor type C	greenyellow	grey60
A_24_P542375	PTMA	5757	prothymosin alpha	red	black
A_23_P124108	ITGAM	3684	integrin subunit alpha M	pink	purple
A_23_P408353	HLA-A	3105	major histocompatibility complex, class I, A	cyan	yellow
A_23_P76799	BAZ1A	11177	bromodomain adjacent to zinc finger domain 1A	greenyellow	grey60
A_23_P100441	FAM192A	80011	family with sequence similarity 192 member A	tan	darkgreen
A_23_P86216	PSMA5	5686	proteasome subunit alpha 5	salmon	tan
A_23_P6561	EBLN2	55096	endogenous Bornavirus like nucleoprotein 2	green	turquoise
A_33_P3211473	XPO7	23039	exportin 7	brown	turquoise
A_23_P104318	DDIT4	54541	DNA damage inducible transcript 4	salmon	tan
A_23_P10815	PUM1	9698	pumilio RNA binding family member 1	greenyellow	lightgreen
A_23_P341325	RPL10L	140801	ribosomal protein L10 like	salmon	tan
A_21_P0002768	NA	NA	NA	blue	greenyellow
A_23_P210886	BCL2L1	598	BCL2 like 1	yellow	red
A_23_P70127	TMED9	54732	transmembrane p24 trafficking protein 9	cyan	blue
A_33_P3287922	TTI1	9675	TELO2 interacting protein 1	brown	turquoise
A_23_P320739	MEF2C	4208	myocyte enhancer factor 2C	greenyellow	grey60
A_23_P146187	RRS1	23212	ribosome biogenesis regulator homolog	green	darkturquoise
A_23_P122724	VNN2	8875	vanin 2	pink	purple
A_23_P57819	TATDN2	9797	TatD DNase domain containing 2	brown	darkorange
A_23_P102404	CCT7	10574	chaperonin containing TCP1 subunit 7	salmon	tan
A_23_P19702	TAB2	23118	TGF-beta activated kinase 1 (MAP3K7) binding protein 2	tan	lightgreen
A_24_P322847	POLR3H	171568	RNA polymerase III subunit H	green	brown
A_23_P110712	DUSP1	1843	dual specificity phosphatase 1	greenyellow	purple
A_21_P0000252	SNORD68	606500	small nucleolar RNA, C/D box 68	magenta	turquoise
A_24_P311771	ZFR	51663	zinc finger RNA binding protein	purple	lightyellow
A_23_P94301	TSTA3	7264	tissue specific transplantation antigen P35B	yellow	darkred
A_33_P3258946	SIRT2	22933	sirtuin 2	cyan	yellow
A_24_P322741	IL10RB	3588	interleukin 10 receptor subunit beta	purple	yellow
A_21_P0001365	NA	NA	NA	green	darkgreen
A_23_P66117	FAM234A	83986	family with sequence similarity 234 member A	brown	turquoise
A_33_P3251289	SELENOS	55829	selenoprotein S	purple	yellow
A_33_P3326733	NA	NA	NA	red	black
A_33_P3411325	NA	NA	NA	blue	greenyellow
A_24_P333733	ATP6V0A1	535	ATPase H+ transporting V0 subunit a1	pink	blue
A_23_P85180	TMEM187	8269	transmembrane protein 187	brown	lightcyan
A_23_P47565	LDHA	3939	lactate dehydrogenase A	purple	yellow
A_24_P330971	EIF3K	27335	eukaryotic translation initiation factor 3 subunit K	purple	tan
A_33_P3332135	PHOSPHO1	162466	phosphoethanolamine/phosphocholine phosphatase	black	salmon
A_24_P44931	MPND	84954	MPN domain containing	cyan	blue
A_23_P368711	LILRB3	11025	leukocyte immunoglobulin like receptor B3	cyan	yellow
A_23_P30745	MEA1	4201	male-enhanced antigen 1	brown	darkorange
A_23_P2884	PIGH	5283	phosphatidylinositol glycan anchor biosynthesis class H	salmon	tan
A_32_P120604	NA	NA	NA	green	darkgrey
A_23_P425104	BRD4	23476	bromodomain containing 4	midnightblue	darkorange
A_23_P206806	ITGAL	3683	integrin subunit alpha L	magenta	darkorange
A_24_P141629	FAM111A	63901	family with sequence similarity 111 member A	purple	midnightblue
A_23_P105794	EPSTI1	94240	epithelial stromal interaction 1	magenta	skyblue
A_24_P103469	LST1	7940	leukocyte specific transcript 1	midnightblue	magenta
A_21_P0014115	NA	NA	NA	tan	darkgreen
A_33_P3362153	TMEM238	388564	transmembrane protein 238	black	salmon
A_23_P200138	SLAMF8	56833	SLAM family member 8	brown	turquoise
A_23_P156156	ZCCHC9	84240	zinc finger CCHC-type containing 9	green	darkgreen
A_23_P33607	TEFM	79736	transcription elongation factor, mitochondrial	blue	darkred
A_21_P0014157	NA	NA	NA	midnightblue	turquoise
A_23_P153867	CERS4	79603	ceramide synthase 4	cyan	blue
A_23_P206382	C16orf70	80262	chromosome 16 open reading frame 70	magenta	darkgrey
A_24_P372134	TMEM140	55281	transmembrane protein 140	cyan	purple
A_33_P3399433	C20orf27	54976	chromosome 20 open reading frame 27	brown	magenta
A_23_P117683	HYPK	25764	huntingtin interacting protein K	green	brown
A_33_P3386364	FANCF	2188	Fanconi anemia complementation group F	green	darkgrey
A_21_P0014782	NA	NA	NA	blue	midnightblue
A_33_P3354151	BOLA1	51027	bolA family member 1	brown	green
A_23_P170453	CST5	1473	cystatin D	red	midnightblue
A_23_P255869	PLGRKT	55848	plasminogen receptor with a C-terminal lysine	salmon	tan
A_23_P57370	HDHD5	27440	haloacid dehalogenase like hydrolase domain containing 5	salmon	tan
A_23_P110846	CNOT8	9337	CCR4-NOT transcription complex subunit 8	purple	grey60
A_23_P200728	FCGR3A	2214	Fc fragment of IgG receptor IIIa	pink	purple
A_21_P0012944	SMA4	11039	glucuronidase beta pseudogene	pink	purple
A_33_P3240353	SLC39A4	55630	solute carrier family 39 member 4	brown	turquoise
A_23_P82929	NOV	4856	nephroblastoma overexpressed	midnightblue	magenta
A_24_P312325	NA	NA	NA	green	darkgrey
A_23_P108751	FHL2	2274	four and a half LIM domains 2	yellow	red
A_24_P307827	WHAMM	123720	WAS protein homolog associated with actin, golgi membranes and microtubules	brown	darkgreen
A_19_P00322569	NA	NA	NA	blue	white
A_23_P162846	LAMP1	3916	lysosomal associated membrane protein 1	green	turquoise
A_23_P13899	GAPDH	2597	glyceraldehyde-3-phosphate dehydrogenase	purple	yellow
A_23_P2661	RAP1B	5908	RAP1B, member of RAS oncogene family	tan	lightgreen
A_23_P123732	IDNK	414328	IDNK, gluconokinase	green	brown
A_23_P104199	ITGB1	3688	integrin subunit beta 1	green	darkgrey
A_21_P0008936	NA	NA	NA	blue	greenyellow
A_33_P3326553	NA	NA	NA	blue	white
A_33_P3338961	NA	NA	NA	red	black
A_32_P207243	NA	NA	NA	brown	turquoise
A_33_P3413335	NA	NA	NA	green	brown
A_23_P259141	ZBP1	81030	Z-DNA binding protein 1	pink	skyblue
A_23_P201551	VAV3	10451	vav guanine nucleotide exchange factor 3	tan	darkgreen
A_19_P00317789	LOC93622	93622	Morf4 family associated protein 1 like 1 pseudogene	salmon	darkturquoise
A_21_P0014317	NA	NA	NA	midnightblue	darkgreen
A_23_P104201	YME1L1	10730	YME1 like 1 ATPase	tan	lightgreen
A_33_P3347928	CCNL1	57018	cyclin L1	purple	lightyellow
A_23_P129556	IL4R	3566	interleukin 4 receptor	midnightblue	darkgreen
A_21_P0000611	FLJ20021	90024	uncharacterized LOC90024	midnightblue	lightcyan
A_23_P162746	CRYL1	51084	crystallin lambda 1	brown	turquoise
A_33_P3245674	NA	NA	NA	black	saddlebrown
A_23_P340158	ISCU	23479	iron-sulfur cluster assembly enzyme	green	darkgreen
A_23_P98085	PTEN	5728	phosphatase and tensin homolog	tan	lightgreen
A_23_P139509	ERGIC2	51290	ERGIC and golgi 2	purple	grey60
A_23_P12849	FBH1	84893	F-box DNA helicase 1	magenta	darkorange
A_23_P19576	SF3B5	83443	splicing factor 3b subunit 5	turquoise	green
A_23_P309261	AKAP9	10142	A-kinase anchoring protein 9	tan	lightgreen
A_23_P35912	CASP4	837	caspase 4	pink	grey60
A_33_P3278159	NA	NA	NA	black	saddlebrown
A_24_P71244	PIK3CD	5293	phosphatidylinositol-4,5-bisphosphate 3-kinase catalytic subunit delta	purple	yellow
A_33_P3337771	TGS1	96764	trimethylguanosine synthase 1	green	darkturquoise
A_21_P0000173	NA	NA	NA	green	skyblue
A_33_P3304707	NA	NA	NA	cyan	pink
A_21_P0012253	NA	NA	NA	purple	yellow
A_33_P3789056	PIK3CD-AS1	644997	PIK3CD antisense RNA 1	black	salmon
A_21_P0010094	NA	NA	NA	black	salmon
A_19_P00810043	NA	NA	NA	purple	purple
A_23_P102202	MSH6	2956	mutS homolog 6	tan	darkgreen
A_23_P112825	LCMT1	51451	leucine carboxyl methyltransferase 1	green	green
A_21_P0011619	TBC1D3P5	440419	TBC1 domain family member 3 pseudogene 5	red	black
A_24_P89843	CYHR1	50626	cysteine and histidine rich 1	salmon	green
A_33_P3416037	FAM96A	84191	family with sequence similarity 96 member A	purple	grey60
A_23_P425587	MED11	400569	mediator complex subunit 11	cyan	tan
A_23_P103104	MFNG	4242	MFNG O-fucosylpeptide 3-beta-N-acetylglucosaminyltransferase	salmon	green
A_33_P3320888	CREB3L2	64764	cAMP responsive element binding protein 3 like 2	brown	darkorange
A_23_P87545	IFITM3	10410	interferon induced transmembrane protein 3	pink	skyblue
A_23_P19590	EZR	7430	ezrin	green	darkgrey
A_23_P11331	TCEAL8	90843	transcription elongation factor A like 8	brown	darkgreen
A_24_P327050	TRAPPC2L	51693	trafficking protein particle complex 2 like	turquoise	brown
A_23_P131723	YWHAQ	10971	tyrosine 3-monooxygenase/tryptophan 5-monooxygenase activation protein theta	purple	tan
A_32_P516342	ANKRD33	341405	ankyrin repeat domain 33	blue	greenyellow
A_33_P3343206	LOC100996414	100996414	putative uncharacterized protein FLJ92257	purple	purple
A_23_P67312	ZNF136	7695	zinc finger protein 136	purple	midnightblue
A_23_P164826	RNASEH2A	10535	ribonuclease H2 subunit A	brown	turquoise
A_23_P40956	GHRL	51738	ghrelin and obestatin prepropeptide	midnightblue	magenta
A_33_P3337026	NA	NA	NA	yellow	darkred
A_33_P3454968	NA	NA	NA	blue	white
A_33_P3275835	TOR2A	27433	torsin family 2 member A	black	salmon
A_23_P148916	OSBPL9	114883	oxysterol binding protein like 9	purple	grey60
A_24_P385611	SP100	6672	SP100 nuclear antigen	purple	midnightblue
A_23_P115762	ECD	11319	ecdysoneless cell cycle regulator	red	lightgreen
A_33_P3305458	ATF6B	1388	activating transcription factor 6 beta	brown	turquoise
A_21_P0011573	NA	NA	NA	blue	white
A_23_P42144	PEX6	5190	peroxisomal biogenesis factor 6	brown	darkorange
A_23_P91657	EWSR1	2130	EWS RNA binding protein 1	cyan	yellow
A_23_P368484	LRRC75A	388341	leucine rich repeat containing 75A	yellow	red
A_24_P29001	LSM3	27258	LSM3 homolog, U6 small nuclear RNA and mRNA degradation associated	turquoise	royalblue
A_33_P3366120	FLNA	2316	filamin A	cyan	blue
A_21_P0010981	MALAT1	378938	metastasis associated lung adenocarcinoma transcript 1 (non-protein coding)	greenyellow	grey60
A_23_P203947	DDX11	1663	DEAD/H-box helicase 11	cyan	lightyellow
A_21_P0003244	NA	NA	NA	brown	turquoise
A_21_P0000341	SNORA61	677838	small nucleolar RNA, H/ACA box 61	magenta	turquoise
A_23_P78134	EMC6	83460	ER membrane protein complex subunit 6	turquoise	royalblue
A_33_P3248664	VARS	7407	valyl-tRNA synthetase	brown	darkorange
A_24_P30194	IFIT5	24138	interferon induced protein with tetratricopeptide repeats 5	tan	skyblue
A_23_P43141	EIF3E	3646	eukaryotic translation initiation factor 3 subunit E	salmon	grey60
A_32_P221748	NA	NA	NA	brown	saddlebrown
A_23_P137948	NENF	29937	neudesin neurotrophic factor	brown	darkorange
A_33_P3799936	ARHGEF10L	55160	Rho guanine nucleotide exchange factor 10 like	midnightblue	darkgreen
A_33_P3256510	KCNK12	56660	potassium two pore domain channel subfamily K member 12	brown	brown
A_24_P376422	NA	NA	NA	purple	yellow
A_33_P3414482	GOT2	2806	glutamic-oxaloacetic transaminase 2	green	brown
A_24_P377277	HSPA4	3308	heat shock protein family A (Hsp70) member 4	purple	midnightblue
A_21_P0002019	NA	NA	NA	blue	darkred
A_24_P399362	PSMG2	56984	proteasome assembly chaperone 2	purple	midnightblue
A_23_P109547	MIEF1	54471	mitochondrial elongation factor 1	salmon	tan
A_23_P150876	VPS37B	79720	VPS37B, ESCRT-I subunit	pink	blue
A_33_P3348639	KTN1	3895	kinectin 1	greenyellow	grey60
A_23_P166421	TBC1D10A	83874	TBC1 domain family member 10A	brown	darkorange
A_33_P3377763	FLJ36000	284124	uncharacterized FLJ36000	black	salmon
A_32_P430359	DDX54	79039	DEAD-box helicase 54	green	brown
A_33_P3406998	DYRK1A	1859	dual specificity tyrosine phosphorylation regulated kinase 1A	magenta	darkgrey
A_33_P3249414	TRIM58	25893	tripartite motif containing 58	yellow	red
A_33_P3387691	SCML4	256380	Scm polycomb group protein like 4	salmon	darkgrey
A_23_P114839	FHL3	2275	four and a half LIM domains 3	cyan	orange
A_33_P3420235	NA	NA	NA	midnightblue	darkorange
A_24_P167052	YME1L1	10730	YME1 like 1 ATPase	red	black
A_21_P0008580	NA	NA	NA	blue	white
A_24_P22079	FOXO1	2308	forkhead box O1	greenyellow	grey60
A_24_P143440	DYNLRB1	83658	dynein light chain roadblock-type 1	cyan	blue
A_23_P203819	GOLGA3	2802	golgin A3	green	brown
A_23_P98686	PGGHG	80162	protein-glucosylgalactosylhydroxylysine glucosidase	salmon	lightyellow
A_24_P71439	PUM2	23369	pumilio RNA binding family member 2	magenta	darkgrey
A_23_P110504	CLPTM1L	81037	CLPTM1 like	cyan	yellow
A_23_P86283	LAPTM5	7805	lysosomal protein transmembrane 5	purple	yellow
A_33_P3266265	ABHD17B	51104	abhydrolase domain containing 17B	tan	darkgreen
A_23_P47800	DIABLO	56616	diablo IAP-binding mitochondrial protein	brown	darkturquoise
A_23_P108554	DDX1	1653	DEAD-box helicase 1	tan	darkgreen
A_33_P3380693	ADAM15	8751	ADAM metallopeptidase domain 15	brown	darkorange
A_23_P112135	TRAM1	23471	translocation associated membrane protein 1	greenyellow	grey60
A_33_P3278265	PYROXD1	79912	pyridine nucleotide-disulphide oxidoreductase domain 1	tan	lightcyan
A_24_P228550	TUBB1	81027	tubulin beta 1 class VI	red	midnightblue
A_23_P155332	PCNP	57092	PEST proteolytic signal containing nuclear protein	greenyellow	grey60
A_21_P0005511	NA	NA	NA	turquoise	darkturquoise
A_32_P18824	BRD7	29117	bromodomain containing 7	tan	darkgreen
A_23_P112531	FAM102A	399665	family with sequence similarity 102 member A	green	brown
A_33_P3384322	NA	NA	NA	brown	darkorange
A_33_P3308446	RHOB	388	ras homolog family member B	black	turquoise
A_24_P262355	PHB	5245	prohibitin	purple	tan
A_33_P3211213	TSEN34	79042	tRNA splicing endonuclease subunit 34	midnightblue	magenta
A_23_P64070	SLC25A45	283130	solute carrier family 25 member 45	blue	greenyellow
A_33_P3339051	ZNF428	126299	zinc finger protein 428	brown	brown
A_24_P341089	ANKRD36BP2	645784	ankyrin repeat domain 36B pseudogene 2	red	lightyellow
A_33_P3331491	LOC728392	728392	uncharacterized LOC728392	pink	magenta
A_33_P3365810	MRPL12	6182	mitochondrial ribosomal protein L12	cyan	blue
A_23_P654	ZBTB17	7709	zinc finger and BTB domain containing 17	cyan	blue
A_24_P256155	NKX1-2	390010	NK1 homeobox 2	black	salmon
A_33_P3247210	NA	NA	NA	black	salmon
A_23_P161399	MXI1	4601	MAX interactor 1, dimerization protein	yellow	red
A_23_P153320	ICAM1	3383	intercellular adhesion molecule 1	midnightblue	magenta
A_24_P396231	LAMP2	3920	lysosomal associated membrane protein 2	tan	lightgreen
A_23_P63038	P3H1	64175	prolyl 3-hydroxylase 1	brown	darkorange
A_23_P252335	MIS18A	54069	MIS18 kinetochore protein A	brown	turquoise
A_33_P3274304	WIPF2	147179	WAS/WASL interacting protein family member 2	midnightblue	darkorange
A_23_P43238	NAPRT	93100	nicotinate phosphoribosyltransferase	cyan	yellow
A_33_P3209254	RPS16P5	647190	ribosomal protein S16 pseudogene 5	magenta	darkgrey
A_33_P3400324	PHC3	80012	polyhomeotic homolog 3	tan	darkgreen
A_33_P3269338	HAUS5	23354	HAUS augmin like complex subunit 5	brown	brown
A_23_P58466	SMN1	6606	survival of motor neuron 1, telomeric	green	darkturquoise
A_33_P3378212	MED25	81857	mediator complex subunit 25	black	salmon
A_23_P394545	WASHC4	23325	WASH complex subunit 4	purple	midnightblue
A_33_P3229725	ARSA	410	arylsulfatase A	magenta	cyan
A_23_P395426	DIDO1	11083	death inducer-obliterator 1	salmon	green
A_23_P347632	MTSS1	9788	MTSS1, I-BAR domain containing	greenyellow	lightgreen
A_23_P354547	NA	NA	NA	pink	skyblue
A_23_P212749	HTT	3064	huntingtin	cyan	green
A_33_P3265950	CBFA2T2	9139	CBFA2/RUNX1 translocation partner 2	cyan	greenyellow
A_23_P329573	ITGB2	3689	integrin subunit beta 2	pink	magenta
A_23_P153767	AKAP8L	26993	A-kinase anchoring protein 8 like	cyan	yellow
A_24_P233078	PYY2	23615	peptide YY 2 (pseudogene)	blue	white
A_23_P204536	SENP1	29843	SUMO specific peptidase 1	tan	darkgreen
A_33_P3356075	LPIN1	23175	lipin 1	blue	saddlebrown
A_24_P117942	TOMM20L	387990	translocase of outer mitochondrial membrane 20 like	black	white
A_23_P105900	BTF3P11	690	basic transcription factor 3 pseudogene 11	purple	midnightblue
A_23_P215051	ECHDC1	55862	ethylmalonyl-CoA decarboxylase 1	tan	lightgreen
A_23_P56170	MED16	10025	mediator complex subunit 16	cyan	blue
A_23_P101208	CYB5A	1528	cytochrome b5 type A	turquoise	red
A_23_P152666	COX11	1353	COX11, cytochrome c oxidase copper chaperone	tan	darkturquoise
A_33_P3238315	RBCK1	10616	RANBP2-type and C3HC4-type zinc finger containing 1	magenta	darkorange
A_33_P3228988	NA	NA	NA	purple	midnightblue
A_23_P501996	UBE2V1	7335	ubiquitin conjugating enzyme E2 V1	purple	darkred
A_23_P339633	GPATCH11	253635	G-patch domain containing 11	green	darkgrey
A_23_P16762	PRPF40A	55660	pre-mRNA processing factor 40 homolog A	greenyellow	grey60
A_24_P941866	NA	NA	NA	magenta	darkgrey
A_23_P112251	GNG10	2790	G protein subunit gamma 10	tan	lightgreen
A_23_P42935	BRAF	673	B-Raf proto-oncogene, serine/threonine kinase	magenta	darkgrey
A_33_P3216890	PAG1	55824	phosphoprotein membrane anchor with glycosphingolipid microdomains 1	red	green
A_23_P81993	SMIM29	221491	small integral membrane protein 29	green	darkturquoise
A_23_P106973	SEPT9	10801	septin 9	salmon	tan
A_23_P101013	TMC6	11322	transmembrane channel like 6	salmon	tan
A_23_P204472	RPLP0	6175	ribosomal protein lateral stalk subunit P0	salmon	tan
A_19_P00321809	LOC401320	401320	uncharacterized LOC401320	red	midnightblue
A_23_P144497	RPS3A	6189	ribosomal protein S3A	turquoise	royalblue
A_33_P3211793	LOC729732	729732	uncharacterized LOC729732	pink	purple
A_23_P121182	HACL1	26061	2-hydroxyacyl-CoA lyase 1	green	darkgreen
A_33_P3273399	NA	NA	NA	blue	white
A_23_P36658	MGST1	4257	microsomal glutathione S-transferase 1	purple	grey60
A_23_P327140	RNF213	57674	ring finger protein 213	midnightblue	skyblue
A_33_P3421611	NA	NA	NA	black	greenyellow
A_24_P263937	SVBP	374969	small vasohibin binding protein	yellow	red
A_23_P83463	SELENOF	9403	selenoprotein F	greenyellow	grey60
A_33_P3268868	NA	NA	NA	purple	lightyellow
A_19_P00315810	NA	NA	NA	blue	salmon
A_23_P256773	EIPR1	7260	EARP complex and GARP complex interacting protein 1	salmon	green
A_32_P54137	UQCRH	7388	ubiquinol-cytochrome c reductase hinge protein	turquoise	royalblue
A_24_P376229	UBA2	10054	ubiquitin like modifier activating enzyme 2	greenyellow	grey60
A_21_P0000218	SNORD35A	26816	small nucleolar RNA, C/D box 35A	magenta	turquoise
A_32_P99432	TRAPPC5	126003	trafficking protein particle complex 5	brown	turquoise
A_33_P3292896	SFXN5	94097	sideroflexin 5	black	salmon
A_23_P338233	BCDIN3D	144233	BCDIN3 domain containing RNA methyltransferase	green	darkgreen
A_23_P204850	RB1	5925	RB transcriptional corepressor 1	tan	lightgreen
A_23_P101950	MDH1	4190	malate dehydrogenase 1	turquoise	darkturquoise
A_24_P217834	HIST1H3D	8351	histone cluster 1 H3 family member d	purple	lightyellow
A_24_P242299	ZRANB2	9406	zinc finger RANBP2-type containing 2	tan	lightgreen
A_21_P0013805	LOC389906	389906	zinc finger protein 839 pseudogene	green	darkorange
A_33_P3386765	ABHD14A	25864	abhydrolase domain containing 14A	green	brown
A_23_P120146	TGFBRAP1	9392	transforming growth factor beta receptor associated protein 1	salmon	lightyellow
A_33_P3369393	NCF1	653361	neutrophil cytosolic factor 1	pink	blue
A_33_P3333863	CCZ1	51622	CCZ1 homolog, vacuolar protein trafficking and biogenesis associated	magenta	darkgrey
A_33_P3229402	PECAM1	5175	platelet and endothelial cell adhesion molecule 1	magenta	orange
A_23_P99540	ZFP36L1	677	ZFP36 ring finger protein like 1	tan	lightgreen
A_23_P252855	BRIX1	55299	BRX1, biogenesis of ribosomes	salmon	darkturquoise
A_23_P151662	MAX	4149	MYC associated factor X	pink	lightyellow
A_23_P38497	SLC25A11	8402	solute carrier family 25 member 11	cyan	yellow
A_21_P0012174	NA	NA	NA	purple	yellow
A_23_P112634	SMIM14	201895	small integral membrane protein 14	greenyellow	lightgreen
A_23_P127195	PRPF18	8559	pre-mRNA processing factor 18	purple	midnightblue
A_23_P104372	DNAJC9	23234	DnaJ heat shock protein family (Hsp40) member C9	green	darkgreen
A_23_P106741	PSMD7	5713	proteasome 26S subunit, non-ATPase 7	green	darkgreen
A_23_P107412	P4HB	5034	prolyl 4-hydroxylase subunit beta	purple	yellow
A_23_P395954	NA	NA	NA	blue	white
A_33_P3243429	GPR152	390212	G protein-coupled receptor 152	blue	white
A_23_P308097	PPP2CB	5516	protein phosphatase 2 catalytic subunit beta	purple	grey60
A_23_P313	PEF1	553115	penta-EF-hand domain containing 1	purple	yellow
A_33_P3401826	CMPK2	129607	cytidine/uridine monophosphate kinase 2	tan	skyblue
A_23_P38219	PRPF8	10594	pre-mRNA processing factor 8	cyan	blue
A_23_P420863	NOD2	64127	nucleotide binding oligomerization domain containing 2	greenyellow	grey60
A_23_P12680	PSAP	5660	prosaposin	purple	yellow
A_23_P502957	CDH26	60437	cadherin 26	midnightblue	turquoise
A_23_P112026	IDO1	3620	indoleamine 2,3-dioxygenase 1	greenyellow	skyblue
A_23_P121356	BBX	56987	BBX, HMG-box containing	salmon	lightyellow
A_23_P30024	NFKB1	4790	nuclear factor kappa B subunit 1	purple	yellow
A_23_P374767	UBE2D4	51619	ubiquitin conjugating enzyme E2 D4 (putative)	green	brown
A_23_P369666	NA	NA	NA	salmon	blue
A_23_P109907	ILDR1	286676	immunoglobulin like domain containing receptor 1	red	black
A_23_P108708	RNF181	51255	ring finger protein 181	turquoise	green
A_23_P325631	SKI	6497	SKI proto-oncogene	magenta	turquoise
A_23_P107211	RAB5C	5878	RAB5C, member RAS oncogene family	cyan	blue
A_23_P69497	CLEC3B	7123	C-type lectin domain family 3 member B	brown	turquoise
A_33_P3334635	RPA2	6118	replication protein A2	purple	midnightblue
A_33_P3339536	EWSR1	2130	EWS RNA binding protein 1	brown	turquoise
A_33_P3410892	NA	NA	NA	midnightblue	saddlebrown
A_33_P3245623	NA	NA	NA	blue	greenyellow
A_23_P78289	FAM104A	84923	family with sequence similarity 104 member A	yellow	red
A_23_P138725	MARVELD1	83742	MARVEL domain containing 1	midnightblue	turquoise
A_21_P0012658	NA	NA	NA	blue	salmon
A_23_P115356	AKR7A2	8574	aldo-keto reductase family 7 member A2	red	green
A_24_P393740	FYB1	2533	FYN binding protein 1	greenyellow	lightgreen
A_23_P149470	NDUFS2	4720	NADH:ubiquinone oxidoreductase core subunit S2	purple	yellow
A_23_P169887	GTF3C2	2976	general transcription factor IIIC subunit 2	greenyellow	tan
A_23_P166087	RASSF2	9770	Ras association domain family member 2	pink	purple
A_23_P49254	HBQ1	3049	hemoglobin subunit theta 1	purple	yellow
A_33_P3410849	C8orf58	541565	chromosome 8 open reading frame 58	blue	white
A_23_P257895	MAPK1	5594	mitogen-activated protein kinase 1	cyan	purple
A_23_P112801	CHP1	11261	calcineurin like EF-hand protein 1	greenyellow	lightgreen
A_33_P3414799	SH3BP2	6452	SH3 domain binding protein 2	magenta	turquoise
A_33_P3278068	ELF1	1997	E74 like ETS transcription factor 1	magenta	darkgrey
A_23_P412321	CCR5	1234	C-C motif chemokine receptor 5 (gene/pseudogene)	green	darkturquoise
A_33_P3348529	NA	NA	NA	purple	yellow
A_24_P222599	PDPK1	5170	3-phosphoinositide dependent protein kinase 1	pink	orange
A_24_P168510	KXD1	79036	KxDL motif containing 1	cyan	yellow
A_23_P54000	SNX6	58533	sorting nexin 6	tan	lightgreen
A_33_P3418942	NUDT21	11051	nudix hydrolase 21	purple	midnightblue
A_33_P3424507	OR51F1	256892	olfactory receptor family 51 subfamily F member 1 (gene/pseudogene)	blue	greenyellow
A_23_P76538	TESC	54997	tescalcin	yellow	darkred
A_19_P00315601	NA	NA	NA	green	darkgrey
A_33_P3335461	NA	NA	NA	blue	greenyellow
A_33_P3216297	NR3C1	2908	nuclear receptor subfamily 3 group C member 1	tan	lightgreen
A_23_P321261	ME2	4200	malic enzyme 2	purple	midnightblue
A_23_P218476	B9D2	80776	B9 domain containing 2	midnightblue	magenta
A_21_P0013269	NA	NA	NA	magenta	darkgrey
A_33_P3257367	TRIM33	51592	tripartite motif containing 33	tan	lightgreen
A_23_P122304	HDAC2	3066	histone deacetylase 2	greenyellow	grey60
A_33_P3274618	LINC01347	731275	long intergenic non-protein coding RNA 1347	blue	greenyellow
A_24_P11307	AHCYL1	10768	adenosylhomocysteinase like 1	cyan	yellow
A_23_P92410	CASP3	836	caspase 3	greenyellow	grey60
A_23_P398294	HIP1R	9026	huntingtin interacting protein 1 related	brown	brown
A_24_P186379	FUOM	282969	fucose mutarotase	cyan	tan
A_23_P145965	TPST1	8460	tyrosylprotein sulfotransferase 1	pink	magenta
A_33_P3316273	CCL3	6348	C-C motif chemokine ligand 3	green	orange
A_33_P3233981	NASP	4678	nuclear autoantigenic sperm protein	black	salmon
A_33_P3337719	LOC100134868	100134868	uncharacterized LOC100134868	red	black
A_23_P122531	C6orf48	50854	chromosome 6 open reading frame 48	turquoise	darkturquoise
A_23_P152548	SCPEP1	59342	serine carboxypeptidase 1	cyan	grey60
A_24_P292020	POLR2J	5439	RNA polymerase II subunit J	cyan	blue
A_23_P371613	CHCHD1	118487	coiled-coil-helix-coiled-coil-helix domain containing 1	turquoise	midnightblue
A_23_P64499	MOB2	81532	MOB kinase activator 2	cyan	blue
A_33_P3298980	NA	NA	NA	purple	midnightblue
A_23_P160438	MYOG	4656	myogenin	black	salmon
A_33_P3396370	ACRBP	84519	acrosin binding protein	black	cyan
A_33_P3233010	KIR3DL2	3812	killer cell immunoglobulin like receptor, three Ig domains and long cytoplasmic tail 2	blue	white
A_33_P3385988	NA	NA	NA	blue	white
A_23_P140511	CLPX	10845	caseinolytic mitochondrial matrix peptidase chaperone subunit	magenta	orange
A_23_P258689	DNAAF5	54919	dynein axonemal assembly factor 5	salmon	darkgrey
A_23_P164691	ICAM3	3385	intercellular adhesion molecule 3	pink	purple
A_33_P3281532	RMND5A	64795	required for meiotic nuclear division 5 homolog A	pink	orange
A_23_P102582	RAB5IF	55969	RAB5 interacting factor	pink	purple
A_23_P404481	S1PR1	1901	sphingosine-1-phosphate receptor 1	purple	tan
A_33_P3260016	NEDD1	121441	neural precursor cell expressed, developmentally down-regulated 1	tan	darkgreen
A_23_P374082	ADAM19	8728	ADAM metallopeptidase domain 19	midnightblue	magenta
A_23_P38015	FBRS	64319	fibrosin	pink	green
A_33_P3247540	LOC389834	389834	ankyrin repeat domain 57 pseudogene	magenta	darkgrey
A_21_P0000366	SNORD11	692058	small nucleolar RNA, C/D box 11	green	brown
A_33_P3423740	TMEM164	84187	transmembrane protein 164	pink	orange
A_24_P15388	NA	NA	NA	magenta	pink
A_33_P3359354	FAAP20	199990	Fanconi anemia core complex associated protein 20	blue	white
A_23_P48088	CD27	939	CD27 molecule	black	darkorange
A_23_P6802	RRP9	9136	ribosomal RNA processing 9, U3 small nucleolar RNA binding protein	brown	darkorange
A_21_P0014396	IPO5P1	100132815	importin 5 pseudogene 1	green	brown
A_21_P0014806	NA	NA	NA	salmon	green
A_21_P0014711	EIF4E2	9470	eukaryotic translation initiation factor 4E family member 2	blue	greenyellow
A_19_P00316758	MAP3K13	9175	mitogen-activated protein kinase kinase kinase 13	brown	lightcyan
A_32_P9468	COX19	90639	COX19, cytochrome c oxidase assembly factor	green	darkgreen
A_23_P121686	AIMP1	9255	aminoacyl tRNA synthetase complex interacting multifunctional protein 1	turquoise	royalblue
A_33_P3361681	VMA21	203547	VMA21, vacuolar ATPase assembly factor	tan	darkgreen
A_33_P3250148	SP8	221833	Sp8 transcription factor	blue	white
A_21_P0007429	NA	NA	NA	black	salmon
A_33_P3380837	AMZ1	155185	archaelysin family metallopeptidase 1	red	black
A_33_P3216433	TPM3P9	147804	tropomyosin 3 pseudogene 9	black	saddlebrown
A_33_P3385387	NA	NA	NA	red	black
A_24_P163113	CDV3	55573	CDV3 homolog	magenta	darkgrey
A_23_P410613	TMEM263	90488	transmembrane protein 263	tan	lightgreen
A_33_P3398448	PARP10	84875	poly(ADP-ribose) polymerase family member 10	brown	darkorange
A_33_P3344423	NCR3	259197	natural cytotoxicity triggering receptor 3	salmon	tan
A_23_P205370	ASB2	51676	ankyrin repeat and SOCS box containing 2	brown	brown
A_23_P47497	MRPL16	54948	mitochondrial ribosomal protein L16	salmon	tan
A_33_P3372124	TRAFD1	10906	TRAF-type zinc finger domain containing 1	black	salmon
A_24_P396994	ATP6V1A	523	ATPase H+ transporting V1 subunit A	greenyellow	grey60
A_33_P3214650	TAP2	6891	transporter 2, ATP binding cassette subfamily B member	tan	lightgreen
A_23_P137984	S100A10	6281	S100 calcium binding protein A10	salmon	midnightblue
A_23_P53126	LMO2	4005	LIM domain only 2	midnightblue	skyblue
A_23_P215956	MYC	4609	MYC proto-oncogene, bHLH transcription factor	greenyellow	tan
A_21_P0009243	NA	NA	NA	greenyellow	black
A_23_P17663	MX1	4599	MX dynamin like GTPase 1	pink	skyblue
A_33_P3209960	RASGRP2	10235	RAS guanyl releasing protein 2	magenta	green
A_21_P0011802	NA	NA	NA	black	salmon
A_23_P100141	UNKL	64718	unkempt family like zinc finger	pink	blue
A_23_P139547	TUBA1A	7846	tubulin alpha 1a	purple	yellow
A_23_P78802	PRKD2	25865	protein kinase D2	cyan	yellow
A_32_P385587	ALAS2	212	5'-aminolevulinate synthase 2	yellow	darkred
A_23_P10374	R3HDM2	22864	R3H domain containing 2	greenyellow	magenta
A_33_P3370076	TFE3	7030	transcription factor binding to IGHM enhancer 3	black	saddlebrown
A_24_P207727	MED15	51586	mediator complex subunit 15	cyan	yellow
A_21_P0011458	NA	NA	NA	blue	greenyellow
A_23_P217088	AK1	203	adenylate kinase 1	yellow	darkred
A_33_P3414113	FAAHP1	729041	fatty acid amide hydrolase pseudogene 1	black	salmon
A_21_P0013166	NA	NA	NA	blue	greenyellow
A_23_P46182	RPS8	6202	ribosomal protein S8	salmon	tan
A_24_P407930	SEH1L	81929	SEH1 like nucleoporin	tan	darkturquoise
A_23_P373079	PATL1	219988	PAT1 homolog 1, processing body mRNA decay factor	cyan	purple
A_23_P80839	MAP6D1	79929	MAP6 domain containing 1	brown	brown
A_23_P334990	SUDS3	64426	SDS3 homolog, SIN3A corepressor complex component	midnightblue	darkgreen
A_33_P3311637	SCFD1	23256	sec1 family domain containing 1	greenyellow	darkturquoise
A_23_P128919	LGALS3	3958	galectin 3	yellow	darkred
A_23_P146637	SIGMAR1	10280	sigma non-opioid intracellular receptor 1	purple	yellow
A_33_P3391275	LINC00494	284749	long intergenic non-protein coding RNA 494	black	salmon
A_21_P0001245	NA	NA	NA	midnightblue	turquoise
A_32_P5480	CERS6	253782	ceramide synthase 6	salmon	tan
A_33_P3375668	NA	NA	NA	turquoise	royalblue
A_21_P0005570	NA	NA	NA	black	salmon
A_24_P339153	SPNS1	83985	sphingolipid transporter 1 (putative)	cyan	yellow
A_21_P0008869	NA	NA	NA	black	salmon
A_23_P404005	CCNQ	92002	cyclin Q	green	brown
A_23_P165624	TNFAIP6	7130	TNF alpha induced protein 6	pink	skyblue
A_33_P3382513	RPUSD1	113000	RNA pseudouridylate synthase domain containing 1	brown	darkorange
A_23_P168951	ZHX2	22882	zinc fingers and homeoboxes 2	greenyellow	darkorange
A_23_P74359	CSRP1	1465	cysteine and glycine rich protein 1	cyan	yellow
A_23_P20196	ARPC1B	10095	actin related protein 2/3 complex subunit 1B	purple	yellow
A_33_P3407835	PPM1M	132160	protein phosphatase, Mg2+/Mn2+ dependent 1M	cyan	yellow
A_24_P722216	DHTKD1	55526	dehydrogenase E1 and transketolase domain containing 1	midnightblue	magenta
A_23_P159937	SLC6A8	6535	solute carrier family 6 member 8	yellow	darkred
A_23_P103476	UBIAD1	29914	UbiA prenyltransferase domain containing 1	brown	turquoise
A_24_P48162	MPG	4350	N-methylpurine DNA glycosylase	cyan	tan
A_23_P105044	MRPL23	6150	mitochondrial ribosomal protein L23	salmon	tan
A_23_P7636	PTTG1	9232	pituitary tumor-transforming 1	brown	turquoise
A_33_P3421626	KIAA1147	57189	KIAA1147	tan	lightgreen
A_33_P3299739	CLDN19	149461	claudin 19	black	salmon
A_23_P204423	PPP1CC	5501	protein phosphatase 1 catalytic subunit gamma	purple	grey60
A_23_P19517	ITPR3	3710	inositol 1,4,5-trisphosphate receptor type 3	salmon	green
A_33_P3300817	RPS5	6193	ribosomal protein S5	turquoise	green
A_23_P53018	HRASLS5	117245	HRAS like suppressor family member 5	blue	white
A_23_P983	PRDX6	9588	peroxiredoxin 6	yellow	red
A_33_P3333050	SLC9A4	389015	solute carrier family 9 member A4	black	saddlebrown
A_23_P155890	NAA11	84779	N(alpha)-acetyltransferase 11, NatA catalytic subunit	cyan	blue
A_32_P17635	SRSF8	10929	serine and arginine rich splicing factor 8	tan	darkgreen
A_23_P201596	AMPD2	271	adenosine monophosphate deaminase 2	cyan	yellow
A_23_P48581	C14orf93	60686	chromosome 14 open reading frame 93	brown	turquoise
A_24_P393461	C1orf43	25912	chromosome 1 open reading frame 43	purple	yellow
A_23_P18604	LAP3	51056	leucine aminopeptidase 3	purple	skyblue
A_23_P109593	TBC1D22A	25771	TBC1 domain family member 22A	magenta	darkgrey
A_23_P106194	FOS	2353	Fos proto-oncogene, AP-1 transcription factor subunit	cyan	purple
A_33_P3722568	LINC00685	283981	long intergenic non-protein coding RNA 685	brown	green
A_32_P140898	FOXN2	3344	forkhead box N2	magenta	darkgrey
A_23_P138137	OMA1	115209	OMA1 zinc metallopeptidase	tan	royalblue
A_23_P208674	EMC10	284361	ER membrane protein complex subunit 10	salmon	green
A_23_P253317	GPR171	29909	G protein-coupled receptor 171	salmon	royalblue
A_23_P250478	PDK3	5165	pyruvate dehydrogenase kinase 3	cyan	purple
A_24_P636332	CCDC84	338657	coiled-coil domain containing 84	salmon	tan
A_23_P120153	RNF149	284996	ring finger protein 149	pink	lightgreen
A_23_P56328	PLVAP	83483	plasmalemma vesicle associated protein	yellow	salmon
A_23_P128073	SMARCC2	6601	SWI/SNF related, matrix associated, actin dependent regulator of chromatin subfamily c member 2	green	brown
A_23_P109333	GATD3A	8209	glutamine amidotransferase like class 1 domain containing 3A	brown	brown
A_23_P60324	UBAC1	10422	UBA domain containing 1	purple	darkred
A_23_P109026	KCNK15	60598	potassium two pore domain channel subfamily K member 15	black	salmon
A_33_P3223056	ADAMTS10	81794	ADAM metallopeptidase with thrombospondin type 1 motif 10	brown	darkorange
A_23_P99260	METAP2	10988	methionyl aminopeptidase 2	turquoise	darkgreen
A_23_P117928	BAHD1	22893	bromo adjacent homology domain containing 1	green	brown
A_24_P100190	NA	NA	NA	blue	white
A_23_P210719	NSFL1C	55968	NSFL1 cofactor	midnightblue	magenta
A_21_P0000694	NIFK-AS1	254128	NIFK antisense RNA 1	brown	brown
A_23_P49842	UNC119	9094	unc-119 lipid binding chaperone	cyan	yellow
A_33_P3228757	ZNF814	730051	zinc finger protein 814	blue	yellow
A_33_P3225298	XKR9	389668	XK related 9	blue	white
A_33_P3270084	NA	NA	NA	green	darkgrey
A_23_P114299	CXCR3	2833	C-X-C motif chemokine receptor 3	green	green
A_23_P11214	NKRF	55922	NFKB repressing factor	tan	darkturquoise
A_23_P334021	IGF2R	3482	insulin like growth factor 2 receptor	purple	purple
A_23_P69362	CCDC51	79714	coiled-coil domain containing 51	green	darkorange
A_23_P117662	HDC	3067	histidine decarboxylase	green	lightcyan
A_23_P212545	RAB5A	5868	RAB5A, member RAS oncogene family	greenyellow	grey60
A_23_P105862	FRY	10129	FRY microtubule binding protein	pink	lightgreen
A_19_P00322545	NA	NA	NA	blue	greenyellow
A_23_P23141	H3F3A	3020	H3 histone family member 3A	purple	midnightblue
A_23_P59630	NA	NA	NA	magenta	darkgrey
A_21_P0011956	NA	NA	NA	brown	brown
A_23_P208706	BAX	581	BCL2 associated X, apoptosis regulator	brown	turquoise
A_24_P232696	SMARCD1	6602	SWI/SNF related, matrix associated, actin dependent regulator of chromatin, subfamily d, member 1	brown	darkorange
A_23_P328069	HPS1	3257	HPS1, biogenesis of lysosomal organelles complex 3 subunit 1	magenta	turquoise
A_19_P00315651	LINC00659	100652730	long intergenic non-protein coding RNA 659	blue	greenyellow
A_23_P114929	MPC2	25874	mitochondrial pyruvate carrier 2	purple	grey60
A_23_P106898	ORAI3	93129	ORAI calcium release-activated calcium modulator 3	midnightblue	turquoise
A_33_P3395883	NA	NA	NA	brown	darkorange
A_23_P143817	MYLK	4638	myosin light chain kinase	black	cyan
A_23_P401106	PDE2A	5138	phosphodiesterase 2A	brown	cyan
A_23_P142714	SLC25A12	8604	solute carrier family 25 member 12	tan	darkgreen
A_23_P404685	LCE1A	353131	late cornified envelope 1A	black	salmon
A_19_P00320708	LOC401320	401320	uncharacterized LOC401320	pink	darkturquoise
A_23_P61127	APOO	79135	apolipoprotein O	green	darkgreen
A_23_P57697	DHX36	170506	DEAH-box helicase 36	tan	lightgreen
A_23_P30464	PRR7	80758	proline rich 7, synaptic	brown	turquoise
A_23_P141389	RPL27	6155	ribosomal protein L27	turquoise	royalblue
A_23_P94800	S100A4	6275	S100 calcium binding protein A4	purple	yellow
A_24_P122921	BCL2L11	10018	BCL2 like 11	greenyellow	lightgreen
A_24_P142743	CNN2	1265	calponin 2	pink	orange
A_33_P3352307	RPS6KA1	6195	ribosomal protein S6 kinase A1	cyan	yellow
A_33_P3252989	ZSWIM8	23053	zinc finger SWIM-type containing 8	pink	orange
A_33_P3229181	SLC12A9	56996	solute carrier family 12 member 9	midnightblue	magenta
A_33_P3232294	ITPR2	3709	inositol 1,4,5-trisphosphate receptor type 2	pink	orange
A_33_P3358253	INPPL1	3636	inositol polyphosphate phosphatase like 1	cyan	yellow
A_23_P100632	JPT1	51155	Jupiter microtubule associated homolog 1	midnightblue	magenta
A_21_P0001364	NA	NA	NA	black	salmon
A_33_P3342126	PRDM8	56978	PR/SET domain 8	tan	darkgreen
A_23_P124003	P2RX2	22953	purinergic receptor P2X 2	blue	greenyellow
A_21_P0009973	NA	NA	NA	blue	greenyellow
A_23_P14284	VTI1B	10490	vesicle transport through interaction with t-SNAREs 1B	yellow	red
A_23_P102731	SMOX	54498	spermine oxidase	black	salmon
A_23_P63655	ATP5F1C	509	ATP synthase F1 subunit gamma	purple	midnightblue
A_23_P89780	LAMA3	3909	laminin subunit alpha 3	blue	salmon
A_33_P3396200	LRCH4	4034	leucine rich repeats and calponin homology domain containing 4	blue	greenyellow
A_24_P103922	CTBP2	1488	C-terminal binding protein 2	cyan	yellow
A_23_P6708	NA	NA	NA	green	darkturquoise
A_33_P3339202	NA	NA	NA	blue	greenyellow
A_23_P112478	NUDT2	318	nudix hydrolase 2	salmon	tan
A_33_P3213006	KRTAP1-4	728255	keratin associated protein 1-4	black	saddlebrown
A_33_P3394183	ZNF324B	388569	zinc finger protein 324B	green	brown
A_23_P79161	PRELID1	27166	PRELI domain containing 1	cyan	tan
A_21_P0011654	NPIPA2	642799	nuclear pore complex interacting protein family member A2	salmon	lightyellow
A_33_P3302305	BCKDHA	593	branched chain keto acid dehydrogenase E1, alpha polypeptide	brown	darkorange
A_23_P43566	NDUFA8	4702	NADH:ubiquinone oxidoreductase subunit A8	green	darkturquoise
A_21_P0013512	NA	NA	NA	salmon	green
A_33_P3331652	NA	NA	NA	blue	salmon
A_23_P93881	SYPL1	6856	synaptophysin like 1	greenyellow	grey60
A_21_P0013254	NA	NA	NA	black	salmon
A_33_P3354479	NA	NA	NA	salmon	green
A_21_P0007127	NA	NA	NA	blue	greenyellow
A_33_P3359115	LMBRD1	55788	LMBR1 domain containing 1	tan	lightgreen
A_23_P425880	TRIO	7204	trio Rho guanine nucleotide exchange factor	cyan	yellow
A_21_P0010421	NA	NA	NA	blue	greenyellow
A_24_P285032	IDS	3423	iduronate 2-sulfatase	pink	orange
A_23_P89981	CYP2F1	1572	cytochrome P450 family 2 subfamily F member 1	blue	salmon
A_21_P0008483	NA	NA	NA	green	brown
A_21_P0005621	NA	NA	NA	blue	greenyellow
A_23_P165186	LIN37	55957	lin-37 DREAM MuvB core complex component	brown	turquoise
A_21_P0003245	NA	NA	NA	brown	turquoise
A_21_P0013052	NA	NA	NA	pink	orange
A_23_P317056	NA	NA	NA	magenta	turquoise
A_23_P53736	FBXO21	23014	F-box protein 21	green	darkturquoise
A_32_P56249	USP30-AS1	100131733	USP30 antisense RNA 1	brown	brown
A_23_P11224	MMGT1	93380	membrane magnesium transporter 1	brown	darkgreen
A_21_P0013251	PMS2	5395	PMS1 homolog 2, mismatch repair system component	salmon	green
A_23_P214487	HIST1H4C	8364	histone cluster 1 H4 family member c	turquoise	darkgrey
A_23_P162486	PTPN6	5777	protein tyrosine phosphatase, non-receptor type 6	cyan	blue
A_21_P0004789	NA	NA	NA	green	brown
A_23_P20832	SPTAN1	6709	spectrin alpha, non-erythrocytic 1	brown	darkorange
A_32_P153892	TAF3	83860	TATA-box binding protein associated factor 3	red	black
A_33_P3214310	FOXP1	27086	forkhead box P1	magenta	turquoise
A_23_P76078	IL23A	51561	interleukin 23 subunit alpha	salmon	darkturquoise
A_23_P36562	ITGA5	3678	integrin subunit alpha 5	cyan	blue
A_33_P3408983	APC	324	APC, WNT signaling pathway regulator	magenta	lightcyan
A_23_P23728	SV2A	9900	synaptic vesicle glycoprotein 2A	black	salmon
A_21_P0008130	NA	NA	NA	blue	salmon
A_21_P0010662	LOC100506023	100506023	uncharacterized LOC100506023	magenta	turquoise
A_23_P64560	PGAP2	27315	post-GPI attachment to proteins 2	brown	turquoise
A_21_P0013952	RBFOX3	146713	RNA binding fox-1 homolog 3	black	greenyellow
A_33_P3280721	WLS	79971	wntless Wnt ligand secretion mediator	midnightblue	magenta
A_23_P81492	RPS14	6208	ribosomal protein S14	salmon	tan
A_23_P117068	SNRPF	6636	small nuclear ribonucleoprotein polypeptide F	salmon	tan
A_33_P3379436	FAM74A4	401508	family with sequence similarity 74 member A4	purple	lightyellow
A_33_P3272990	FKBP8	23770	FK506 binding protein 8	yellow	red
A_23_P23719	VPS45	11311	vacuolar protein sorting 45 homolog	purple	tan
A_33_P3289848	CDX1	1044	caudal type homeobox 1	black	salmon
A_23_P100654	ZBTB4	57659	zinc finger and BTB domain containing 4	green	brown
A_23_P129209	IDH2	3418	isocitrate dehydrogenase (NADP(+)) 2, mitochondrial	cyan	yellow
A_33_P3629131	NA	NA	NA	blue	salmon
A_33_P3214705	REX1BD	55049	required for excision 1-B domain containing	brown	darkorange
A_33_P3244843	PRKAG3	53632	protein kinase AMP-activated non-catalytic subunit gamma 3	black	salmon
A_33_P3396951	BNIP3L	665	BCL2 interacting protein 3 like	yellow	darkred
A_23_P125829	PGK1	5230	phosphoglycerate kinase 1	greenyellow	grey60
A_23_P26674	MARF1	9665	meiosis regulator and mRNA stability factor 1	tan	red
A_33_P3373560	SPTAN1	6709	spectrin alpha, non-erythrocytic 1	blue	greenyellow
A_23_P108785	ACTR3	10096	ARP3 actin related protein 3 homolog	greenyellow	grey60
A_33_P3294053	ANKRD39	51239	ankyrin repeat domain 39	green	brown
A_24_P933492	ZDHHC21	340481	zinc finger DHHC-type containing 21	magenta	darkgrey
A_21_P0001666	NA	NA	NA	black	salmon
A_23_P368996	LRRC56	115399	leucine rich repeat containing 56	brown	brown
A_21_P0013078	NA	NA	NA	purple	yellow
A_23_P102391	SLC40A1	30061	solute carrier family 40 member 1	greenyellow	grey60
A_23_P118722	ASGR1	432	asialoglycoprotein receptor 1	midnightblue	darkgreen
A_23_P104362	ECHS1	1892	enoyl-CoA hydratase, short chain 1	salmon	green
A_33_P3399181	NA	NA	NA	black	saddlebrown
A_33_P3353672	RAB28	9364	RAB28, member RAS oncogene family	tan	darkgreen
A_23_P147805	NA	NA	NA	purple	midnightblue
A_33_P3280157	SNORD116-19	727708	small nucleolar RNA, C/D box 116-19	brown	turquoise
A_24_P307869	LLGL2	3993	LLGL2, scribble cell polarity complex component	cyan	tan
A_23_P146765	RNF139	11236	ring finger protein 139	tan	lightgreen
A_33_P3312564	NA	NA	NA	red	black
A_23_P109928	PSMD6	9861	proteasome 26S subunit, non-ATPase 6	purple	grey60
A_23_P93258	HIST1H3B	8358	histone cluster 1 H3 family member b	red	lightyellow
A_23_P111961	MAK16	84549	MAK16 homolog	greenyellow	darkturquoise
A_33_P3349145	TTLL1	25809	tubulin tyrosine ligase like 1	green	brown
A_21_P0000294	SNORA71B	26776	small nucleolar RNA, H/ACA box 71B	black	salmon
A_21_P0000254	SNORD31	9298	small nucleolar RNA, C/D box 31	magenta	turquoise
A_23_P71094	GCC1	79571	GRIP and coiled-coil domain containing 1	purple	yellow
A_23_P162228	NACA	4666	nascent polypeptide-associated complex alpha subunit	purple	tan
A_19_P00322711	LINC00662	148189	long intergenic non-protein coding RNA 662	green	brown
A_23_P252783	SLC2A8	29988	solute carrier family 2 member 8	brown	brown
A_23_P115149	WDR77	79084	WD repeat domain 77	salmon	darkturquoise
A_23_P141021	LPCAT2	54947	lysophosphatidylcholine acyltransferase 2	pink	purple
A_24_P317762	LY6E	4061	lymphocyte antigen 6 family member E	cyan	skyblue
A_33_P3259861	REREP3	646396	arginine-glutamic acid dipeptide repeats pseudogene 3	blue	greenyellow
A_23_P40194	DDX27	55661	DEAD-box helicase 27	salmon	darkturquoise
A_21_P0008266	NA	NA	NA	blue	greenyellow
A_23_P91814	SLC25A38	54977	solute carrier family 25 member 38	purple	darkred
A_33_P3261610	POLR3GL	84265	RNA polymerase III subunit G like	salmon	tan
A_23_P255444	DAPP1	27071	dual adaptor of phosphotyrosine and 3-phosphoinositides 1	purple	grey60
A_23_P102542	AFTPH	54812	aftiphilin	tan	lightgreen
A_23_P65427	PSME2	5721	proteasome activator subunit 2	brown	skyblue
A_23_P329870	RHBDF2	79651	rhomboid 5 homolog 2	magenta	lightcyan
A_23_P120227	LBH	81606	limb bud and heart development	salmon	tan
A_23_P103414	YTHDF2	51441	YTH N6-methyladenosine RNA binding protein 2	greenyellow	grey60
A_32_P140139	F13A1	2162	coagulation factor XIII A chain	black	cyan
A_24_P917833	TMED10	10972	transmembrane p24 trafficking protein 10	purple	grey60
A_33_P3297345	TTC24	164118	tetratricopeptide repeat domain 24	brown	turquoise
A_23_P25224	YBX3	8531	Y-box binding protein 3	yellow	darkred
A_23_P59836	METTL2B	55798	methyltransferase like 2B	green	brown
A_33_P3355232	UBLCP1	134510	ubiquitin like domain containing CTD phosphatase 1	tan	lightgreen
A_23_P73530	MTMR1	8776	myotubularin related protein 1	greenyellow	grey60
A_21_P0000394	SNORD110	692213	small nucleolar RNA, C/D box 110	magenta	saddlebrown
A_23_P45917	CKS1B	1163	CDC28 protein kinase regulatory subunit 1B	brown	darkgreen
A_23_P149259	TMEM79	84283	transmembrane protein 79	red	blue
A_33_P3299766	NA	NA	NA	midnightblue	turquoise
A_23_P250629	PSMB8	5696	proteasome subunit beta 8	cyan	tan
A_23_P352266	BCL2	596	BCL2, apoptosis regulator	tan	darkgreen
A_23_P123866	UBAP1	51271	ubiquitin associated protein 1	purple	darkred
A_23_P2725	RPL21	6144	ribosomal protein L21	turquoise	royalblue
A_23_P251303	SEC16A	9919	SEC16 homolog A, endoplasmic reticulum export factor	purple	yellow
A_23_P119418	URI1	8725	URI1, prefoldin like chaperone	magenta	darkgrey
A_24_P86389	HIST1H2AM	8336	histone cluster 1 H2A family member m	magenta	orange
A_23_P118002	UQCRC2	7385	ubiquinol-cytochrome c reductase core protein 2	tan	darkgreen
A_32_P20367	RPS7	6201	ribosomal protein S7	turquoise	royalblue
A_23_P212354	CCR2	729230	C-C motif chemokine receptor 2	greenyellow	grey60
A_23_P57347	PCNT	5116	pericentrin	green	green
A_23_P424316	TCF20	6942	transcription factor 20	pink	orange
A_23_P85441	IGSF9	57549	immunoglobulin superfamily member 9	blue	white
A_23_P149099	DDOST	1650	dolichyl-diphosphooligosaccharide--protein glycosyltransferase non-catalytic subunit	cyan	tan
A_23_P138849	KAT5	10524	lysine acetyltransferase 5	cyan	blue
A_24_P271527	JOSD1	9929	Josephin domain containing 1	salmon	tan
A_23_P49220	TCF25	22980	transcription factor 25	cyan	yellow
A_23_P251945	DCTN4	51164	dynactin subunit 4	greenyellow	grey60
A_24_P174367	PPP1R2	5504	protein phosphatase 1 regulatory inhibitor subunit 2	greenyellow	grey60
A_23_P200489	TMEM63A	9725	transmembrane protein 63A	cyan	blue
A_33_P3329737	NA	NA	NA	cyan	lightyellow
A_24_P239811	UBXN11	91544	UBX domain protein 11	brown	darkorange
A_23_P153236	CHMP2A	27243	charged multivesicular body protein 2A	midnightblue	magenta
A_33_P3361422	CYP27A1	1593	cytochrome P450 family 27 subfamily A member 1	midnightblue	magenta
A_33_P3358740	OSBPL7	114881	oxysterol binding protein like 7	green	brown
A_23_P37359	CIDEB	27141	cell death-inducing DFFA-like effector b	cyan	blue
A_23_P102262	MRPL19	9801	mitochondrial ribosomal protein L19	salmon	darkturquoise
A_33_P3365432	NCF4	4689	neutrophil cytosolic factor 4	cyan	yellow
A_24_P67142	SON	6651	SON DNA binding protein	red	orange
A_33_P3300092	NDST1	3340	N-deacetylase and N-sulfotransferase 1	midnightblue	magenta
A_23_P135995	ARV1	64801	ARV1 homolog, fatty acid homeostasis modulator	turquoise	grey60
A_33_P3245248	TERC	7012	telomerase RNA component	blue	greenyellow
A_23_P345591	PSMA2	5683	proteasome subunit alpha 2	purple	midnightblue
A_23_P105957	ACTN1	87	actinin alpha 1	cyan	blue
A_33_P3369039	PRPF31	26121	pre-mRNA processing factor 31	salmon	blue
A_23_P152906	ALOX12	239	arachidonate 12-lipoxygenase, 12S type	black	cyan
A_23_P406135	IFT172	26160	intraflagellar transport 172	black	salmon
A_24_P368943	EVX1	2128	even-skipped homeobox 1	black	salmon
A_23_P165402	SF3B6	51639	splicing factor 3b subunit 6	turquoise	grey60
A_24_P390833	MPPE1	65258	metallophosphoesterase 1	purple	yellow
A_23_P128808	GPR132	29933	G protein-coupled receptor 132	blue	greenyellow
A_23_P208900	SEMA6B	10501	semaphorin 6B	black	saddlebrown
A_23_P153026	GAA	2548	glucosidase alpha, acid	midnightblue	turquoise
A_21_P0005595	NA	NA	NA	green	green
A_33_P3619171	PMAIP1	5366	phorbol-12-myristate-13-acetate-induced protein 1	pink	lightgreen
A_24_P67552	NA	NA	NA	red	black
A_33_P3329839	CDK2AP2	10263	cyclin dependent kinase 2 associated protein 2	brown	green
A_23_P90523	OCEL1	79629	occludin/ELL domain containing 1	brown	darkorange
A_24_P17722	TBC1D9B	23061	TBC1 domain family member 9B	green	brown
A_23_P17134	MAL	4118	mal, T cell differentiation protein	green	brown
A_33_P3214803	PRDM13	59336	PR/SET domain 13	blue	white
A_23_P94501	ANXA1	301	annexin A1	turquoise	grey60
A_23_P21425	GPR119	139760	G protein-coupled receptor 119	blue	greenyellow
A_24_P116871	TXNL4A	10907	thioredoxin like 4A	purple	tan
A_23_P146367	CARD19	84270	caspase recruitment domain family member 19	brown	magenta
A_21_P0000642	C10orf143	387723	chromosome 10 open reading frame 143	turquoise	brown
A_23_P57667	PLXNA1	5361	plexin A1	green	brown
A_23_P94365	ADCK5	203054	aarF domain containing kinase 5	brown	darkorange
A_23_P317683	TRAPPC10	7109	trafficking protein particle complex 10	tan	lightgreen
A_23_P109821	TADA3	10474	transcriptional adaptor 3	salmon	green
A_23_P163955	PEMT	10400	phosphatidylethanolamine N-methyltransferase	cyan	blue
A_33_P3285354	C11orf95	65998	chromosome 11 open reading frame 95	blue	white
A_21_P0011675	NA	NA	NA	purple	yellow
A_32_P193288	RPL18A	6142	ribosomal protein L18a	salmon	tan
A_23_P37347	SNW1	22938	SNW domain containing 1	greenyellow	grey60
A_33_P3352578	CLEC4D	338339	C-type lectin domain family 4 member D	pink	purple
A_24_P296698	MAP2K3	5606	mitogen-activated protein kinase kinase 3	yellow	red
A_33_P3289222	LRRC41	10489	leucine rich repeat containing 41	cyan	yellow
A_23_P168882	TP53INP1	94241	tumor protein p53 inducible nuclear protein 1	greenyellow	grey60
A_32_P212058	CEP19	84984	centrosomal protein 19	pink	purple
A_21_P0001177	NA	NA	NA	brown	turquoise
A_24_P861009	BRWD1	54014	bromodomain and WD repeat domain containing 1	salmon	tan
A_33_P3220530	SRSF6	6431	serine and arginine rich splicing factor 6	tan	darkgreen
A_24_P324011	KCTD2	23510	potassium channel tetramerization domain containing 2	blue	greenyellow
A_23_P253375	CUX1	1523	cut like homeobox 1	brown	skyblue
A_33_P3256560	ZER1	10444	zyg-11 related cell cycle regulator	yellow	red
A_33_P3316671	NA	NA	NA	brown	turquoise
A_24_P921321	PTPRJ	5795	protein tyrosine phosphatase, receptor type J	pink	purple
A_23_P112596	ADK	132	adenosine kinase	turquoise	royalblue
A_24_P158421	SAR1A	56681	secretion associated Ras related GTPase 1A	greenyellow	grey60
A_23_P46275	ATP5PB	515	ATP synthase peripheral stalk-membrane subunit b	purple	midnightblue
A_23_P72138	MRPS22	56945	mitochondrial ribosomal protein S22	turquoise	royalblue
A_21_P0009448	NA	NA	NA	blue	greenyellow
A_23_P106002	NFKBIA	4792	NFKB inhibitor alpha	tan	lightgreen
A_33_P3336527	PDXDC1	23042	pyridoxal dependent decarboxylase domain containing 1	salmon	lightyellow
A_23_P250982	ISOC1	51015	isochorismatase domain containing 1	greenyellow	grey60
A_33_P3381851	KRTAP10-10	353333	keratin associated protein 10-10	blue	salmon
A_24_P627306	EDEM2	55741	ER degradation enhancing alpha-mannosidase like protein 2	midnightblue	magenta
A_33_P3349252	NA	NA	NA	blue	white
A_33_P3329078	HBG1	3047	hemoglobin subunit gamma 1	yellow	darkred
A_23_P115167	LRRC8B	23507	leucine rich repeat containing 8 VRAC subunit B	purple	midnightblue
A_33_P3362770	RRN3	54700	RRN3 homolog, RNA polymerase I transcription factor	purple	lightyellow
A_23_P105571	CHPT1	56994	choline phosphotransferase 1	yellow	darkred
A_33_P3396434	NA	NA	NA	blue	midnightblue
A_23_P79426	CAB39	51719	calcium binding protein 39	greenyellow	grey60
A_23_P3849	TRAP1	10131	TNF receptor associated protein 1	cyan	yellow
A_33_P3416221	NA	NA	NA	black	saddlebrown
A_24_P416159	RBL2	5934	RB transcriptional corepressor like 2	greenyellow	lightgreen
A_23_P217269	VSIG4	11326	V-set and immunoglobulin domain containing 4	brown	turquoise
A_21_P0002435	NA	NA	NA	green	darkgreen
A_33_P3283480	CTSC	1075	cathepsin C	tan	darkgreen
A_24_P66528	SRP9	6726	signal recognition particle 9	purple	grey60
A_23_P132294	GGA1	26088	golgi associated, gamma adaptin ear containing, ARF binding protein 1	salmon	green
A_21_P0012294	NA	NA	NA	blue	white
A_23_P111804	PARP12	64761	poly(ADP-ribose) polymerase family member 12	cyan	skyblue
A_33_P3237574	HLA-A	3105	major histocompatibility complex, class I, A	blue	white
A_23_P118306	DNAJA3	9093	DnaJ heat shock protein family (Hsp40) member A3	salmon	tan
A_33_P3398719	NA	NA	NA	blue	greenyellow
A_21_P0011609	NA	NA	NA	brown	green
A_23_P395911	NA	NA	NA	blue	greenyellow
A_23_P113634	CBFB	865	core-binding factor beta subunit	greenyellow	lightgreen
A_23_P107684	ZNF324	25799	zinc finger protein 324	brown	green
A_23_P132936	SPCS3	60559	signal peptidase complex subunit 3	turquoise	royalblue
A_32_P150300	LOC101928370	101928370	uncharacterized LOC101928370	black	darkorange
A_33_P3419733	DNAJC5	80331	DnaJ heat shock protein family (Hsp40) member C5	magenta	darkgrey
A_33_P3366073	EBPL	84650	emopamil binding protein like	green	brown
A_33_P3257528	ZNF451	26036	zinc finger protein 451	magenta	darkgrey
A_23_P129334	CLCN7	1186	chloride voltage-gated channel 7	cyan	blue
A_33_P3329433	TTN	7273	titin	salmon	lightyellow
A_33_P3369761	PDP1	54704	pyruvate dehyrogenase phosphatase catalytic subunit 1	tan	darkgreen
A_23_P121602	SAP30	8819	Sin3A associated protein 30	greenyellow	lightgreen
A_23_P253177	STK24	8428	serine/threonine kinase 24	greenyellow	grey60
A_33_P3421571	RAPH1	65059	Ras association (RalGDS/AF-6) and pleckstrin homology domains 1	black	salmon
A_24_P944444	MAPKBP1	23005	mitogen-activated protein kinase binding protein 1	magenta	turquoise
A_33_P3281273	S1PR4	8698	sphingosine-1-phosphate receptor 4	pink	green
A_33_P3297642	FAM204A	63877	family with sequence similarity 204 member A	tan	royalblue
A_33_P3479449	NA	NA	NA	pink	purple
A_23_P331813	ZNF687	57592	zinc finger protein 687	cyan	blue
A_33_P3246838	NA	NA	NA	salmon	tan
A_23_P362183	ANKS6	203286	ankyrin repeat and sterile alpha motif domain containing 6	green	brown
A_23_P118289	BCL7C	9274	BCL tumor suppressor 7C	turquoise	green
A_23_P328600	SLC8B1	80024	solute carrier family 8 member B1	purple	yellow
A_23_P200829	SRGAP2	23380	SLIT-ROBO Rho GTPase activating protein 2	pink	skyblue
A_33_P3376781	NA	NA	NA	pink	magenta
A_23_P420373	DNMT3A	1788	DNA methyltransferase 3 alpha	brown	darkgreen
A_33_P3384452	TFDP1	7027	transcription factor Dp-1	yellow	red
A_23_P162589	VDR	7421	vitamin D receptor	midnightblue	magenta
A_23_P205549	MAX	4149	MYC associated factor X	midnightblue	cyan
A_33_P3352782	TANGO6	79613	transport and golgi organization 6 homolog	brown	turquoise
A_21_P0005195	NA	NA	NA	blue	greenyellow
A_32_P80068	CLEC2D	29121	C-type lectin domain family 2 member D	salmon	tan
A_33_P3252635	ZNF254	9534	zinc finger protein 254	magenta	darkgrey
A_33_P3240843	TMEM71	137835	transmembrane protein 71	purple	purple
A_23_P11729	ZBTB7B	51043	zinc finger and BTB domain containing 7B	brown	turquoise
A_33_P3784253	PAK1	5058	p21 (RAC1) activated kinase 1	pink	magenta
A_23_P64770	DDX23	9416	DEAD-box helicase 23	salmon	tan
A_24_P169234	ZAP70	7535	zeta chain of T cell receptor associated protein kinase 70	salmon	green
A_24_P763243	EEF1A1	1915	eukaryotic translation elongation factor 1 alpha 1	purple	midnightblue
A_19_P00315603	NA	NA	NA	pink	green
A_33_P3223544	TMBIM4	51643	transmembrane BAX inhibitor motif containing 4	turquoise	royalblue
A_23_P119222	RETN	56729	resistin	midnightblue	magenta
A_24_P637982	C1orf122	127687	chromosome 1 open reading frame 122	brown	turquoise
A_33_P3363665	NFYC	4802	nuclear transcription factor Y subunit gamma	cyan	yellow
A_23_P29575	MRPS36	92259	mitochondrial ribosomal protein S36	turquoise	darkgreen
A_24_P365327	LSM14A	26065	LSM14A, mRNA processing body assembly factor	tan	darkgreen
A_33_P3225696	ZNF526	116115	zinc finger protein 526	red	midnightblue
A_33_P3266444	MRPS25	64432	mitochondrial ribosomal protein S25	tan	darkturquoise
A_23_P131020	GATAD2A	54815	GATA zinc finger domain containing 2A	midnightblue	blue
A_33_P3339865	CALML5	51806	calmodulin like 5	black	salmon
A_21_P0011141	NA	NA	NA	black	salmon
A_24_P382765	SNU13	4809	small nuclear ribonucleoprotein 13	salmon	tan
A_19_P00320603	NA	NA	NA	black	salmon
A_33_P3295148	GLUD1P3	2749	glutamate dehydrogenase 1 pseudogene 3	blue	white
A_24_P343233	HLA-DRB1	3123	major histocompatibility complex, class II, DR beta 1	cyan	tan
A_23_P66110	TSC2	7249	TSC complex subunit 2	cyan	blue
A_33_P3212982	PLEKHM1	9842	pleckstrin homology and RUN domain containing M1	midnightblue	turquoise
A_33_P3328254	IL5RA	3568	interleukin 5 receptor subunit alpha	brown	white
A_23_P208835	MAP2K2	5605	mitogen-activated protein kinase kinase 2	cyan	yellow
A_33_P3287428	NA	NA	NA	brown	turquoise
A_23_P250294	ABHD5	51099	abhydrolase domain containing 5	pink	magenta
A_33_P3319502	NA	NA	NA	purple	midnightblue
A_33_P3348313	ELP6	54859	elongator acetyltransferase complex subunit 6	salmon	tan
A_23_P142776	EIF3F	8665	eukaryotic translation initiation factor 3 subunit F	purple	midnightblue
A_21_P0011603	AMZ2	51321	archaelysin family metallopeptidase 2	purple	midnightblue
A_24_P933794	NA	NA	NA	black	saddlebrown
A_24_P353638	SLAMF7	57823	SLAM family member 7	green	brown
A_33_P3256095	NA	NA	NA	blue	greenyellow
A_23_P89199	COPS3	8533	COP9 signalosome subunit 3	tan	red
A_23_P68240	GPAT2	150763	glycerol-3-phosphate acyltransferase 2, mitochondrial	blue	white
A_23_P140384	CTSG	1511	cathepsin G	midnightblue	cyan
A_23_P157580	SDCBP	6386	syndecan binding protein	purple	purple
A_21_P0004423	NA	NA	NA	pink	orange
A_23_P90357	TBXA2R	6915	thromboxane A2 receptor	brown	cyan
A_21_P0013723	GLIDR	389741	glioblastoma down-regulated RNA	brown	brown
A_32_P145010	LOC729683	729683	uncharacterized LOC729683	magenta	brown
A_24_P125561	SIGLEC9	27180	sialic acid binding Ig like lectin 9	pink	orange
A_33_P3336198	BRICD5	283870	BRICHOS domain containing 5	brown	darkorange
A_23_P81770	PTP4A1	7803	protein tyrosine phosphatase type IVA, member 1	tan	lightgreen
A_23_P377616	CIRBP	1153	cold inducible RNA binding protein	purple	tan
A_23_P153383	RPL36	25873	ribosomal protein L36	brown	darkorange
A_33_P3323722	ARL4C	10123	ADP ribosylation factor like GTPase 4C	green	darkgreen
A_33_P3357397	NA	NA	NA	purple	yellow
A_21_P0012340	PI4KA	5297	phosphatidylinositol 4-kinase alpha	cyan	yellow
A_33_P3309684	NA	NA	NA	salmon	tan
A_33_P3278911	NA	NA	NA	pink	grey60
A_23_P68327	CFAP36	112942	cilia and flagella associated protein 36	red	black
A_23_P165090	NDUFS7	374291	NADH:ubiquinone oxidoreductase core subunit S7	brown	green
A_33_P3371718	SAT1	6303	spermidine/spermine N1-acetyltransferase 1	purple	midnightblue
A_19_P00319236	NA	NA	NA	blue	white
A_21_P0001652	NA	NA	NA	green	lightcyan
A_33_P3387931	CENPP	401541	centromere protein P	brown	turquoise
A_23_P16116	RAB4B	53916	RAB4B, member RAS oncogene family	cyan	blue
A_23_P56529	AAMP	14	angio associated migratory cell protein	cyan	yellow
A_24_P398898	MORF4L1	10933	mortality factor 4 like 1	greenyellow	grey60
A_23_P122624	LTV1	84946	LTV1 ribosome biogenesis factor	greenyellow	grey60
A_33_P3218138	POLR2A	5430	RNA polymerase II subunit A	pink	magenta
A_23_P100292	ZNF598	90850	zinc finger protein 598	green	darkturquoise
A_33_P3390335	RSU1	6251	Ras suppressor protein 1	cyan	darkred
A_23_P94494	TLE4	7091	transducin like enhancer of split 4	pink	purple
A_24_P367432	NA	NA	NA	magenta	brown
A_21_P0001837	NA	NA	NA	black	salmon
A_23_P159125	SLC16A5	9121	solute carrier family 16 member 5	midnightblue	magenta
A_32_P46191	ZNF727	442319	zinc finger protein 727	purple	midnightblue
A_23_P43490	CDKN2A	1029	cyclin dependent kinase inhibitor 2A	black	salmon
A_23_P121533	SPON2	10417	spondin 2	green	brown
A_33_P3228564	DOK3	79930	docking protein 3	blue	greenyellow
A_33_P3329916	RPL6	6128	ribosomal protein L6	salmon	royalblue
A_24_P403244	PILRB	29990	paired immunoglobin-like type 2 receptor beta	cyan	tan
A_32_P215179	NPIPA1	9284	nuclear pore complex interacting protein family member A1	magenta	darkgrey
A_23_P83094	TLE4	7091	transducin like enhancer of split 4	greenyellow	grey60
A_24_P304051	GSTO1	9446	glutathione S-transferase omega 1	turquoise	grey60
A_24_P107336	VPS26B	112936	VPS26, retromer complex component B	cyan	yellow
A_33_P3247077	NA	NA	NA	black	saddlebrown
A_21_P0012078	MIR4435-2HG	541471	MIR4435-2 host gene	pink	lightyellow
A_23_P405707	NA	NA	NA	green	darkturquoise
A_33_P3303259	PARP4	143	poly(ADP-ribose) polymerase family member 4	cyan	lightyellow
A_23_P10232	BANK1	55024	B cell scaffold protein with ankyrin repeats 1	greenyellow	lightgreen
A_33_P3372647	NA	NA	NA	cyan	pink
A_24_P126181	NR2C2AP	126382	nuclear receptor 2C2 associated protein	brown	darkorange
A_24_P101402	NOP56	10528	NOP56 ribonucleoprotein	green	green
A_24_P138361	EIF3M	10480	eukaryotic translation initiation factor 3 subunit M	greenyellow	grey60
A_23_P120931	APOBEC3C	27350	apolipoprotein B mRNA editing enzyme catalytic subunit 3C	purple	yellow
A_24_P98555	FAM45A	404636	family with sequence similarity 45 member A	pink	purple
A_33_P3313635	NA	NA	NA	black	salmon
A_21_P0003090	NA	NA	NA	blue	greenyellow
A_33_P3813684	LINC01761	440594	long intergenic non-protein coding RNA 1761	red	black
A_23_P259580	TAPBP	6892	TAP binding protein	magenta	darkgrey
A_23_P79962	MKKS	8195	McKusick-Kaufman syndrome	turquoise	darkgreen
A_33_P3381647	AKT2	208	AKT serine/threonine kinase 2	brown	turquoise
A_19_P00805006	MALAT1	378938	metastasis associated lung adenocarcinoma transcript 1 (non-protein coding)	green	lightcyan
A_33_P3346791	SCAMP3	10067	secretory carrier membrane protein 3	green	darkorange
A_23_P303891	LCE1C	353133	late cornified envelope 1C	blue	white
A_23_P37870	STUB1	10273	STIP1 homology and U-box containing protein 1	cyan	tan
A_23_P345564	OPRL1	4987	opioid related nociceptin receptor 1	blue	greenyellow
A_21_P0011065	NA	NA	NA	pink	purple
A_21_P0000202	MGAT4B	11282	mannosyl (alpha-1,3-)-glycoprotein beta-1,4-N-acetylglucosaminyltransferase, isozyme B	red	lightcyan
A_24_P271363	CDS2	8760	CDP-diacylglycerol synthase 2	midnightblue	magenta
A_33_P3262580	NA	NA	NA	blue	greenyellow
A_23_P209726	SP140	11262	SP140 nuclear body protein	cyan	pink
A_23_P112412	TEX10	54881	testis expressed 10	green	brown
A_33_P3241269	CES1	1066	carboxylesterase 1	midnightblue	magenta
A_23_P169576	EXOC6	54536	exocyst complex component 6	tan	lightgreen
A_23_P406131	TMEM159	57146	transmembrane protein 159	green	turquoise
A_19_P00800467	CLEC2D	29121	C-type lectin domain family 2 member D	red	midnightblue
A_24_P56689	ZNF205	7755	zinc finger protein 205	blue	black
A_24_P238744	POTEM	641455	POTE ankyrin domain family member M	cyan	yellow
A_33_P3220818	SAFB	6294	scaffold attachment factor B	midnightblue	turquoise
A_23_P145024	ADRB2	154	adrenoceptor beta 2	green	darkgreen
A_33_P3422931	MRPS34	65993	mitochondrial ribosomal protein S34	cyan	green
A_33_P3349444	NAGA	4668	alpha-N-acetylgalactosaminidase	midnightblue	darkorange
A_33_P3342613	ZDHHC8	29801	zinc finger DHHC-type containing 8	green	brown
A_21_P0002169	NA	NA	NA	blue	greenyellow
A_23_P115215	VPS72	6944	vacuolar protein sorting 72 homolog	cyan	darkorange
A_33_P3375476	KLHDC4	54758	kelch domain containing 4	brown	brown
A_33_P3415037	VDAC2	7417	voltage dependent anion channel 2	salmon	tan
A_23_P123393	KCNQ3	3786	potassium voltage-gated channel subfamily Q member 3	blue	greenyellow
A_24_P212152	MZT2B	80097	mitotic spindle organizing protein 2B	turquoise	green
A_33_P3399064	RNA5-8SN5	100008587	RNA, 5.8S ribosomal N5	red	tan
A_23_P50535	DMPK	1760	DM1 protein kinase	brown	darkorange
A_21_P0011433	BCAP31	10134	B cell receptor associated protein 31	cyan	blue
A_23_P315122	EMX1	2016	empty spiracles homeobox 1	blue	salmon
A_23_P78835	ZNF787	126208	zinc finger protein 787	midnightblue	blue
A_24_P327084	PRSS33	260429	serine protease 33	midnightblue	white
A_33_P3546363	NA	NA	NA	blue	white
A_33_P3281435	NA	NA	NA	purple	pink
A_33_P3250730	ASIC4	55515	acid sensing ion channel subunit family member 4	blue	white
A_23_P101461	CCDC130	81576	coiled-coil domain containing 130	brown	darkorange
A_23_P20255	COMMD5	28991	COMM domain containing 5	brown	darkorange
A_32_P83784	ARAP2	116984	ArfGAP with RhoGAP domain, ankyrin repeat and PH domain 2	greenyellow	grey60
A_23_P130149	ENO3	2027	enolase 3	brown	darkorange
A_23_P22224	EIF4EBP1	1978	eukaryotic translation initiation factor 4E binding protein 1	brown	darkorange
A_33_P3504659	CASP10	843	caspase 10	green	turquoise
A_24_P54485	CCDC115	84317	coiled-coil domain containing 115	cyan	yellow
A_21_P0001486	NA	NA	NA	blue	greenyellow
A_23_P203558	HBB	3043	hemoglobin subunit beta	red	white
A_23_P150286	PSMA1	5682	proteasome subunit alpha 1	greenyellow	grey60
A_23_P152356	ZNF200	7752	zinc finger protein 200	tan	lightgreen
A_24_P135628	NA	NA	NA	blue	white
A_24_P418809	GNAS	2778	GNAS complex locus	purple	yellow
A_23_P202219	CALHM2	51063	calcium homeostasis modulator family member 2	salmon	green
A_33_P3410599	FAM46A	55603	family with sequence similarity 46 member A	tan	lightgreen
A_33_P3302796	U2AF2	11338	U2 small nuclear RNA auxiliary factor 2	green	darkorange
A_24_P586390	LOC100133331	100133331	uncharacterized LOC100133331	pink	orange
A_24_P396702	CD302	9936	CD302 molecule	greenyellow	grey60
A_21_P0009172	NA	NA	NA	blue	greenyellow
A_23_P121898	PARP8	79668	poly(ADP-ribose) polymerase family member 8	purple	grey60
A_24_P125881	DGCR2	9993	DiGeorge syndrome critical region gene 2	midnightblue	magenta
A_23_P147025	RAB33A	9363	RAB33A, member RAS oncogene family	green	brown
A_33_P3417865	ZFP36L1	677	ZFP36 ring finger protein like 1	midnightblue	magenta
A_24_P81900	SLC2A3	6515	solute carrier family 2 member 3	pink	purple
A_23_P77073	SPPL2A	84888	signal peptide peptidase like 2A	purple	grey60
A_23_P116602	USP35	57558	ubiquitin specific peptidase 35	brown	turquoise
A_24_P418203	CNTNAP3	79937	contactin associated protein like 3	pink	orange
A_33_P3447441	NA	NA	NA	tan	lightgreen
A_24_P30923	SNN	8303	stannin	purple	yellow
A_33_P3393694	NOP53	29997	NOP53 ribosome biogenesis factor	salmon	green
A_21_P0006824	NA	NA	NA	salmon	lightyellow
A_24_P59667	JAK3	3718	Janus kinase 3	midnightblue	brown
A_33_P3377619	CACUL1	143384	CDK2 associated cullin domain 1	purple	yellow
A_33_P3404588	FGD4	121512	FYVE, RhoGEF and PH domain containing 4	pink	purple
A_23_P259413	CDV3	55573	CDV3 homolog	purple	darkred
A_23_P104734	STT3A	3703	STT3A, catalytic subunit of the oligosaccharyltransferase complex	brown	turquoise
A_32_P118258	RPL21	6144	ribosomal protein L21	turquoise	royalblue
A_24_P242646	CTSS	1520	cathepsin S	red	black
A_33_P3340309	ZNF768	79724	zinc finger protein 768	brown	turquoise
A_33_P3240674	BRD3	8019	bromodomain containing 3	brown	turquoise
A_24_P288298	KIR2DL4	3805	killer cell immunoglobulin like receptor, two Ig domains and long cytoplasmic tail 4	blue	greenyellow
A_33_P3407042	B3GALT6	126792	beta-1,3-galactosyltransferase 6	green	brown
A_32_P190488	NA	NA	NA	turquoise	royalblue
A_24_P149645	PUF60	22827	poly(U) binding splicing factor 60	brown	darkorange
A_33_P3228190	KCNAB2	8514	potassium voltage-gated channel subfamily A regulatory beta subunit 2	magenta	turquoise
A_23_P121196	TMEM43	79188	transmembrane protein 43	pink	purple
A_21_P0000684	LOC100506548	100506548	uncharacterized LOC100506548	tan	darkgreen
A_19_P00321166	LOC100132356	100132356	uncharacterized LOC100132356	brown	turquoise
A_33_P3394599	HMG20B	10362	high mobility group 20B	blue	white
A_33_P3422258	C8orf59	401466	chromosome 8 open reading frame 59	turquoise	royalblue
A_33_P3422248	NA	NA	NA	blue	white
A_32_P101844	NA	NA	NA	midnightblue	magenta
A_23_P355289	AFG3L1P	172	AFG3 like matrix AAA peptidase subunit 1, pseudogene	salmon	tan
A_33_P3390032	EXOC7	23265	exocyst complex component 7	brown	turquoise
A_21_P0011503	NA	NA	NA	pink	orange
A_21_P0002584	NA	NA	NA	blue	greenyellow
A_19_P00315764	NA	NA	NA	black	salmon
A_23_P502609	PIGQ	9091	phosphatidylinositol glycan anchor biosynthesis class Q	cyan	darkred
A_23_P26771	CD300C	10871	CD300c molecule	cyan	purple
A_21_P0000305	PDCL3	79031	phosducin like 3	green	darkturquoise
A_23_P29985	NA	NA	NA	red	black
A_33_P3343305	NA	NA	NA	black	salmon
A_23_P37778	FHOD1	29109	formin homology 2 domain containing 1	cyan	blue
A_23_P111583	CD36	948	CD36 molecule	turquoise	grey60
A_32_P205944	RGPD5	84220	RANBP2-like and GRIP domain containing 5	magenta	darkgrey
A_32_P6832	C5orf51	285636	chromosome 5 open reading frame 51	green	darkturquoise
A_21_P0000310	SNORA12	677800	small nucleolar RNA, H/ACA box 12	magenta	turquoise
A_23_P79122	USE1	55850	unconventional SNARE in the ER 1	brown	darkorange
A_23_P9255	SYK	6850	spleen associated tyrosine kinase	pink	blue
A_23_P106694	CHMP1A	5119	charged multivesicular body protein 1A	brown	darkorange
A_33_P3209522	SLFN5	162394	schlafen family member 5	red	black
A_32_P107746	ENSA	2029	endosulfine alpha	purple	yellow
A_23_P86632	DCLRE1C	64421	DNA cross-link repair 1C	salmon	tan
A_23_P154306	TANK	10010	TRAF family member associated NFKB activator	purple	midnightblue
A_24_P329600	UBQLN1	29979	ubiquilin 1	tan	darkgreen
A_32_P156892	ST13	6767	ST13, Hsp70 interacting protein	black	saddlebrown
A_23_P106127	KIAA0586	9786	KIAA0586	green	brown
A_23_P107795	DMAC2	55101	distal membrane arm assembly complex 2	green	darkturquoise
A_21_P0011372	RAD51-AS1	100505648	RAD51 antisense RNA 1 (head to head)	red	midnightblue
A_24_P206736	ZNF143	7702	zinc finger protein 143	red	midnightblue
A_21_P0000511	SNAR-H	100170221	small ILF3/NF90-associated RNA H	magenta	turquoise
A_21_P0000148	NDUFB6	4712	NADH:ubiquinone oxidoreductase subunit B6	turquoise	royalblue
A_24_P136470	BTN2A3P	54718	butyrophilin subfamily 2 member A3, pseudogene	black	lightcyan
A_33_P3376821	GZMA	3001	granzyme A	turquoise	royalblue
A_23_P68529	ITPA	3704	inosine triphosphatase	green	green
A_23_P65651	WARS	7453	tryptophanyl-tRNA synthetase	pink	skyblue
A_33_P3273534	KRT81	3887	keratin 81	black	salmon
A_33_P3325006	TSSC4	10078	tumor suppressing subtransferable candidate 4	brown	turquoise
A_32_P206479	ZNF831	128611	zinc finger protein 831	green	darkturquoise
A_23_P52826	BUD13	84811	BUD13 homolog	green	magenta
A_23_P259357	SLC35E4	339665	solute carrier family 35 member E4	purple	midnightblue
A_33_P3791123	ATP5MGL	267020	ATP synthase membrane subunit g like	red	black
A_33_P3353581	IGBP1	3476	immunoglobulin binding protein 1	salmon	grey60
A_24_P96961	SPSB1	80176	splA/ryanodine receptor domain and SOCS box containing 1	brown	turquoise
A_32_P122402	LOC441455	441455	makorin ring finger protein 1 pseudogene	yellow	darkred
A_33_P3335257	CATSPERD	257062	cation channel sperm associated auxiliary subunit delta	black	salmon
A_23_P91619	MIF	4282	macrophage migration inhibitory factor	salmon	green
A_21_P0011495	DDX11L9	100288486	DEAD/H-box helicase 11 like 9	black	cyan
A_21_P0006976	NA	NA	NA	blue	greenyellow
A_33_P3217983	ACSL5	51703	acyl-CoA synthetase long chain family member 5	green	darkgreen
A_33_P3260605	CTNNAL1	8727	catenin alpha like 1	yellow	red
A_23_P31765	PKIA	5569	cAMP-dependent protein kinase inhibitor alpha	tan	darkgreen
A_19_P00315824	PCAT19	100505495	prostate cancer associated transcript 19 (non-protein coding)	black	salmon
A_33_P3277514	BTK	695	Bruton tyrosine kinase	red	black
A_23_P357717	TCL1A	8115	T cell leukemia/lymphoma 1A	green	darkturquoise
A_23_P154108	DYNC1I2	1781	dynein cytoplasmic 1 intermediate chain 2	tan	lightgreen
A_23_P106145	ERO1A	30001	endoplasmic reticulum oxidoreductase 1 alpha	pink	grey60
A_23_P120566	RRBP1	6238	ribosome binding protein 1	cyan	blue
A_33_P3328292	PLAGL2	5326	PLAG1 like zinc finger 2	midnightblue	saddlebrown
A_33_P3416762	LYPLA1	10434	lysophospholipase I	greenyellow	lightgreen
A_23_P121082	GBE1	2632	1,4-alpha-glucan branching enzyme 1	tan	darkgreen
A_19_P00809558	SSB	6741	Sjogren syndrome antigen B	turquoise	darkturquoise
A_24_P37540	ARPC4-TTLL3	100526693	ARPC4-TTLL3 readthrough	cyan	yellow
A_23_P92035	SETD5	55209	SET domain containing 5	black	salmon
A_24_P307065	NA	NA	NA	purple	midnightblue
A_33_P3364459	GMPR2	51292	guanosine monophosphate reductase 2	purple	midnightblue
A_33_P3357247	USP36	57602	ubiquitin specific peptidase 36	green	brown
A_23_P113317	P4HTM	54681	prolyl 4-hydroxylase, transmembrane	cyan	tan
A_33_P3317168	EPS8L3	79574	EPS8 like 3	blue	white
A_23_P80278	SFI1	9814	SFI1 centrin binding protein	brown	brown
A_23_P87742	IFFO1	25900	intermediate filament family orphan 1	green	green
A_33_P3302354	CABIN1	23523	calcineurin binding protein 1	cyan	blue
A_24_P92183	PABPC1L	80336	poly(A) binding protein cytoplasmic 1 like	cyan	blue
A_33_P3298062	ABCC5	10057	ATP binding cassette subfamily C member 5	midnightblue	magenta
A_23_P71864	MIGA2	84895	mitoguardin 2	cyan	yellow
A_23_P20035	GPR146	115330	G protein-coupled receptor 146	yellow	red
A_23_P58353	HNRNPD	3184	heterogeneous nuclear ribonucleoprotein D	greenyellow	tan
A_33_P3256785	CARM1	10498	coactivator associated arginine methyltransferase 1	black	salmon
A_23_P101185	NARS	4677	asparaginyl-tRNA synthetase	greenyellow	grey60
A_33_P3784283	JAK1	3716	Janus kinase 1	purple	midnightblue
A_33_P3370094	MME	4311	membrane metalloendopeptidase	pink	orange
A_23_P92499	TLR2	7097	toll like receptor 2	pink	purple
A_23_P353888	DOCK8	81704	dedicator of cytokinesis 8	purple	midnightblue
A_33_P3244882	AGO3	192669	argonaute 3, RISC catalytic component	magenta	darkgrey
A_33_P3407780	PPM1F	9647	protein phosphatase, Mg2+/Mn2+ dependent 1F	midnightblue	brown
A_23_P74653	NUDC	10726	nuclear distribution C, dynein complex regulator	cyan	yellow
A_32_P453321	ARMH1	339541	armadillo-like helical domain containing 1	turquoise	darkorange
A_21_P0007932	NA	NA	NA	blue	greenyellow
A_23_P207911	TRPV2	51393	transient receptor potential cation channel subfamily V member 2	brown	darkorange
A_33_P3312802	RPL13AP17	399670	ribosomal protein L13a pseudogene 17	blue	white
A_33_P3259135	NSG1	27065	neuronal vesicle trafficking associated 1	tan	brown
A_33_P3271323	RHOQ	23433	ras homolog family member Q	tan	lightgreen
A_24_P214598	PPM1K	152926	protein phosphatase, Mg2+/Mn2+ dependent 1K	magenta	brown
A_33_P3286608	PGBD2	267002	piggyBac transposable element derived 2	salmon	lightyellow
A_23_P132669	GLT8D1	55830	glycosyltransferase 8 domain containing 1	greenyellow	tan
A_23_P111141	BAG6	7917	BCL2 associated athanogene 6	yellow	darkred
A_24_P336957	HTRA2	27429	HtrA serine peptidase 2	cyan	yellow
A_33_P3375613	C8orf44-SGK3	100533105	C8orf44-SGK3 readthrough	red	black
A_23_P11664	SRSF11	9295	serine and arginine rich splicing factor 11	purple	grey60
A_33_P3228023	SCPEP1	59342	serine carboxypeptidase 1	cyan	yellow
A_24_P85478	ARIH1	25820	ariadne RBR E3 ubiquitin protein ligase 1	magenta	turquoise
A_33_P3329652	ZFP90	146198	ZFP90 zinc finger protein	brown	brown
A_23_P122563	PFDN6	10471	prefoldin subunit 6	turquoise	green
A_23_P2223	MYL6B	140465	myosin light chain 6B	brown	turquoise
A_33_P3308903	MIB2	142678	mindbomb E3 ubiquitin protein ligase 2	cyan	blue
A_33_P3366754	NA	NA	NA	purple	yellow
A_23_P89123	CFDP1	10428	craniofacial development protein 1	purple	midnightblue
A_33_P3298535	ROMO1	140823	reactive oxygen species modulator 1	brown	turquoise
A_23_P106773	SULT1A2	6799	sulfotransferase family 1A member 2	black	magenta
A_23_P129786	SREBF1	6720	sterol regulatory element binding transcription factor 1	green	darkturquoise
A_24_P33461	NA	NA	NA	blue	greenyellow
A_23_P352950	PNMA5	114824	PNMA family member 5	blue	greenyellow
A_23_P66421	NAT9	26151	N-acetyltransferase 9 (putative)	salmon	green
A_23_P18824	PAPD7	11044	poly(A) RNA polymerase D7, non-canonical	greenyellow	tan
A_33_P3403778	ZNF579	163033	zinc finger protein 579	brown	darkorange
A_33_P3263902	MXI1	4601	MAX interactor 1, dimerization protein	yellow	darkred
A_23_P71904	NTMT1	28989	N-terminal Xaa-Pro-Lys N-methyltransferase 1	cyan	tan
A_33_P3387616	RHPN1	114822	rhophilin Rho GTPase binding protein 1	brown	brown
A_23_P55802	AP1M1	8907	adaptor related protein complex 1 mu 1 subunit	cyan	blue
A_23_P118633	SPATA20	64847	spermatogenesis associated 20	black	salmon
A_23_P113523	GTPBP6	8225	GTP binding protein 6 (putative)	brown	green
A_33_P3344574	SFTPA2	729238	surfactant protein A2	blue	white
A_32_P227317	DDX11L2	84771	DEAD/H-box helicase 11 like 2	purple	lightyellow
A_33_P3589819	NA	NA	NA	blue	greenyellow
A_23_P401084	ZNF575	284346	zinc finger protein 575	brown	darkorange
A_23_P107653	ETFB	2109	electron transfer flavoprotein beta subunit	brown	green
A_23_P47357	RPS25	6230	ribosomal protein S25	turquoise	royalblue
A_33_P3232993	MARK2	2011	microtubule affinity regulating kinase 2	cyan	yellow
A_23_P47879	STAT6	6778	signal transducer and activator of transcription 6	greenyellow	blue
A_21_P0005579	NA	NA	NA	magenta	orange
A_21_P0013558	NA	NA	NA	brown	turquoise
A_23_P109254	RBM39	9584	RNA binding motif protein 39	tan	lightgreen
A_33_P3336223	NA	NA	NA	black	saddlebrown
A_23_P53541	CHD4	1108	chromodomain helicase DNA binding protein 4	cyan	yellow
A_21_P0000480	NA	NA	NA	blue	white
A_23_P68851	KREMEN1	83999	kringle containing transmembrane protein 1	pink	purple
A_33_P3235053	TRIM47	91107	tripartite motif containing 47	green	brown
A_23_P55136	RANGRF	29098	RAN guanine nucleotide release factor	salmon	tan
A_32_P50522	FKBP1A	2280	FK506 binding protein 1A	cyan	purple
A_33_P3884179	LOC100506123	100506123	uncharacterized LOC100506123	purple	tan
A_23_P132417	LSG1	55341	large 60S subunit nuclear export GTPase 1	green	darkturquoise
A_23_P417383	ASPRV1	151516	aspartic peptidase retroviral like 1	pink	magenta
A_23_P214638	EHMT2	10919	euchromatic histone lysine methyltransferase 2	cyan	blue
A_33_P3325131	CANX	821	calnexin	purple	lightyellow
A_21_P0013968	NA	NA	NA	blue	greenyellow
A_32_P743407	GLYR1	84656	glyoxylate reductase 1 homolog	magenta	darkorange
A_24_P88800	COX7A2L	9167	cytochrome c oxidase subunit 7A2 like	purple	yellow
A_21_P0000344	RPL32	6161	ribosomal protein L32	magenta	darkgrey
A_23_P502797	WDFY1	57590	WD repeat and FYVE domain containing 1	purple	midnightblue
A_23_P49082	NUBP2	10101	nucleotide binding protein 2	cyan	yellow
A_23_P206107	ULK3	25989	unc-51 like kinase 3	cyan	tan
A_23_P135769	ACTB	60	actin beta	purple	yellow
A_33_P3378531	AS3MT	57412	arsenite methyltransferase	purple	lightyellow
A_21_P0000235	SNORA6	574040	small nucleolar RNA, H/ACA box 6	salmon	darkgrey
A_23_P311740	CUL9	23113	cullin 9	brown	brown
A_33_P3294509	CD44	960	CD44 molecule (Indian blood group)	greenyellow	lightgreen
A_23_P65741	DIS3L	115752	DIS3 like exosome 3'-5' exoribonuclease	salmon	green
A_23_P119617	SUGP1	57794	SURP and G-patch domain containing 1	cyan	blue
A_21_P0008544	NA	NA	NA	black	magenta
A_24_P193295	RAB15	376267	RAB15, member RAS oncogene family	green	brown
A_23_P6293	UBASH3A	53347	ubiquitin associated and SH3 domain containing A	salmon	green
A_33_P3324086	MCUR1	63933	mitochondrial calcium uniporter regulator 1	green	cyan
A_23_P502035	GALT	2592	galactose-1-phosphate uridylyltransferase	cyan	tan
A_23_P120270	MCFD2	90411	multiple coagulation factor deficiency 2	magenta	turquoise
A_23_P34597	CDA	978	cytidine deaminase	pink	magenta
A_21_P0010295	NA	NA	NA	blue	greenyellow
A_23_P144816	VDAC1	7416	voltage dependent anion channel 1	cyan	tan
A_23_P10463	NDUFS5	4725	NADH:ubiquinone oxidoreductase subunit S5	turquoise	royalblue
A_32_P3556	VPS35	55737	VPS35, retromer complex component	purple	yellow
A_33_P3278941	REC8	9985	REC8 meiotic recombination protein	midnightblue	skyblue
A_23_P137046	NYX	60506	nyctalopin	black	greenyellow
A_33_P3292602	NA	NA	NA	red	black
A_24_P381962	AP1G1	164	adaptor related protein complex 1 gamma 1 subunit	midnightblue	turquoise
A_21_P0012439	TRANK1	9881	tetratricopeptide repeat and ankyrin repeat containing 1	pink	orange
A_33_P3268167	NA	NA	NA	blue	greenyellow
A_21_P0001110	NA	NA	NA	cyan	yellow
A_23_P164089	RFFL	117584	ring finger and FYVE like domain containing E3 ubiquitin protein ligase	tan	lightcyan
A_24_P157087	CASP8	841	caspase 8	purple	midnightblue
A_23_P212089	NFKBIZ	64332	NFKB inhibitor zeta	midnightblue	darkgreen
A_23_P75790	MYRF	745	myelin regulatory factor	blue	white
A_23_P43800	BOP1	23246	block of proliferation 1	cyan	blue
A_23_P431305	FAM69B	138311	family with sequence similarity 69 member B	brown	cyan
A_24_P303874	C9orf62	157927	chromosome 9 open reading frame 62	blue	white
A_23_P170978	ZNF692	55657	zinc finger protein 692	brown	darkorange
A_23_P34510	PHC2	1912	polyhomeotic homolog 2	pink	purple
A_23_P77714	CLUAP1	23059	clusterin associated protein 1	green	turquoise
A_23_P126970	TIMM17A	10440	translocase of inner mitochondrial membrane 17A	turquoise	darkturquoise
A_24_P50458	TERF1	7013	telomeric repeat binding factor 1	green	lightcyan
A_24_P724153	NA	NA	NA	brown	turquoise
A_24_P98613	TSPAN14	81619	tetraspanin 14	brown	darkorange
A_23_P105562	VWF	7450	von Willebrand factor	magenta	cyan
A_23_P34930	BCAS2	10286	BCAS2, pre-mRNA processing factor	greenyellow	grey60
A_33_P3362193	RAD23A	5886	RAD23 homolog A, nucleotide excision repair protein	yellow	red
A_23_P314760	PRKAG2	51422	protein kinase AMP-activated non-catalytic subunit gamma 2	magenta	turquoise
A_33_P3344308	APTX	54840	aprataxin	brown	brown
A_33_P3399560	IFT27	11020	intraflagellar transport 27	cyan	blue
A_33_P3349552	CASKIN1	57524	CASK interacting protein 1	black	salmon
A_33_P3293524	NEURL1	9148	neuralized E3 ubiquitin protein ligase 1	blue	cyan
A_24_P399694	ZCCHC3	85364	zinc finger CCHC-type containing 3	tan	darkturquoise
A_19_P00320948	NA	NA	NA	pink	purple
A_33_P3362900	FAM228B	375190	family with sequence similarity 228 member B	green	lightcyan
A_23_P376627	D2HGDH	728294	D-2-hydroxyglutarate dehydrogenase	green	darkorange
A_32_P113154	NA	NA	NA	red	black
A_33_P3329467	STYXL1	51657	serine/threonine/tyrosine interacting like 1	brown	turquoise
A_23_P127948	ADM	133	adrenomedullin	pink	skyblue
A_33_P3229161	UTP14C	9724	UTP14C, small subunit processome component	salmon	midnightblue
A_32_P902957	ARL11	115761	ADP ribosylation factor like GTPase 11	magenta	magenta
A_23_P23611	AMY1C	278	amylase, alpha 1C (salivary)	tan	lightgreen
A_23_P9883	NLRP3	114548	NLR family pyrin domain containing 3	midnightblue	magenta
A_23_P61531	GLB1	2720	galactosidase beta 1	red	magenta
A_23_P212617	TFRC	7037	transferrin receptor	purple	grey60
A_23_P104804	ZBTB16	7704	zinc finger and BTB domain containing 16	cyan	blue
A_23_P91114	PREB	10113	prolactin regulatory element binding	cyan	tan
A_33_P3322236	NA	NA	NA	purple	yellow
A_21_P0003419	NA	NA	NA	cyan	yellow
A_33_P3274332	UBE2J1	51465	ubiquitin conjugating enzyme E2 J1	midnightblue	darkgreen
A_33_P3319640	NA	NA	NA	black	saddlebrown
A_32_P230868	RIPOR1	79567	RHO family interacting cell polarization regulator 1	black	salmon
A_23_P219013	ABCC10	89845	ATP binding cassette subfamily C member 10	blue	greenyellow
A_23_P117558	FKBP3	2287	FK506 binding protein 3	turquoise	royalblue
A_24_P287691	AP3S2	10239	adaptor related protein complex 3 sigma 2 subunit	midnightblue	turquoise
A_33_P3276142	DNM1P46	196968	dynamin 1 pseudogene 46	magenta	brown
A_23_P204550	SCYL2	55681	SCY1 like pseudokinase 2	tan	lightgreen
A_33_P3363091	NA	NA	NA	salmon	tan
A_23_P103905	UFC1	51506	ubiquitin-fold modifier conjugating enzyme 1	salmon	midnightblue
A_24_P230176	CCDC137	339230	coiled-coil domain containing 137	brown	turquoise
A_33_P3308332	PLEKHB1	58473	pleckstrin homology domain containing B1	brown	brown
A_33_P3340682	ZNF276	92822	zinc finger protein 276	salmon	black
A_23_P112950	ATF7IP	55729	activating transcription factor 7 interacting protein	cyan	yellow
A_33_P3335624	NA	NA	NA	red	black
A_23_P22119	PLEC	5339	plectin	brown	blue
A_24_P389491	COQ4	51117	coenzyme Q4	cyan	blue
A_23_P132438	MSL2	55167	MSL complex subunit 2	greenyellow	grey60
A_23_P154447	NOP58	51602	NOP58 ribonucleoprotein	turquoise	darkturquoise
A_23_P84782	THAP4	51078	THAP domain containing 4	salmon	green
A_23_P115346	EIF2D	1939	eukaryotic translation initiation factor 2D	salmon	tan
A_33_P3239849	GPX1	2876	glutathione peroxidase 1	yellow	darkred
A_24_P99216	LRP10	26020	LDL receptor related protein 10	cyan	yellow
A_23_P61149	INPP5D	3635	inositol polyphosphate-5-phosphatase D	red	lightcyan
A_23_P252106	RIPK2	8767	receptor interacting serine/threonine kinase 2	purple	grey60
A_24_P381604	ITM2B	9445	integral membrane protein 2B	red	black
A_23_P112482	AQP3	360	aquaporin 3 (Gill blood group)	purple	tan
A_33_P3225230	SIN3B	23309	SIN3 transcription regulator family member B	green	brown
A_33_P3258191	C16orf91	283951	chromosome 16 open reading frame 91	turquoise	brown
A_33_P3406927	ADPGK	83440	ADP dependent glucokinase	cyan	yellow
A_23_P321354	TMEM71	137835	transmembrane protein 71	greenyellow	grey60
A_32_P703	LOC646626	646626	uncharacterized LOC646626	black	darkgreen
A_33_P3294603	SLC22A31	146429	solute carrier family 22 member 31	blue	greenyellow
A_19_P00317887	MPRIP	23164	myosin phosphatase Rho interacting protein	brown	brown
A_21_P0014355	LOC100134391	100134391	uncharacterized LOC100134391	blue	greenyellow
A_33_P3236310	NOBOX	135935	NOBOX oogenesis homeobox	black	salmon
A_23_P12053	SPEN	23013	spen family transcriptional repressor	greenyellow	purple
A_21_P0003205	NA	NA	NA	black	saddlebrown
A_21_P0007309	NA	NA	NA	black	salmon
A_23_P114903	HSPA6	3310	heat shock protein family A (Hsp70) member 6	pink	purple
A_24_P319364	F11R	50848	F11 receptor	midnightblue	magenta
A_23_P113005	EFNA1	1942	ephrin A1	blue	greenyellow
A_24_P228717	RAC2	5880	Rac family small GTPase 2	purple	yellow
A_33_P3317664	MGAT1	4245	mannosyl (alpha-1,3-)-glycoprotein beta-1,2-N-acetylglucosaminyltransferase	cyan	yellow
A_32_P179676	TOB2	10766	transducer of ERBB2, 2	green	darkturquoise
A_23_P60225	GRHPR	9380	glyoxylate and hydroxypyruvate reductase	cyan	tan
A_33_P3410019	NA	NA	NA	cyan	yellow
A_21_P0000099	CLDN7	1366	claudin 7	black	saddlebrown
A_23_P419107	TCP11L2	255394	t-complex 11 like 2	yellow	red
A_23_P117599	AHSA1	10598	activator of HSP90 ATPase activity 1	cyan	yellow
A_33_P3261818	MDH1	4190	malate dehydrogenase 1	turquoise	royalblue
A_21_P0009533	NA	NA	NA	blue	white
A_33_P3226177	CYFIP2	26999	cytoplasmic FMR1 interacting protein 2	cyan	yellow
A_24_P8075	NA	NA	NA	green	green
A_23_P84344	SIGIRR	59307	single Ig and TIR domain containing	brown	green
A_33_P3298105	SPATA13	221178	spermatogenesis associated 13	cyan	yellow
A_21_P0000382	SNORD71	692111	small nucleolar RNA, C/D box 71	magenta	turquoise
A_23_P18413	TIMMDC1	51300	translocase of inner mitochondrial membrane domain containing 1	tan	darkturquoise
A_23_P54376	STOML1	9399	stomatin like 1	brown	brown
A_24_P164731	TMED1	11018	transmembrane p24 trafficking protein 1	cyan	yellow
A_33_P3375368	GPR35	2859	G protein-coupled receptor 35	cyan	blue
A_23_P104116	RBM8A	9939	RNA binding motif protein 8A	turquoise	royalblue
A_32_P4364	BCAP31	10134	B cell receptor associated protein 31	brown	darkorange
A_24_P161581	SHISA7	729956	shisa family member 7	black	salmon
A_23_P150092	SEPHS1	22929	selenophosphate synthetase 1	brown	turquoise
A_21_P0000236	SNORA64	26784	small nucleolar RNA, H/ACA box 64	magenta	turquoise
A_33_P3224809	IL17RA	23765	interleukin 17 receptor A	pink	magenta
A_33_P3256054	MLST8	64223	MTOR associated protein, LST8 homolog	brown	darkorange
A_24_P153568	MPEG1	219972	macrophage expressed 1	purple	grey60
A_33_P3224307	SCARNA12	677777	small Cajal body-specific RNA 12	magenta	turquoise
A_23_P111303	SCAF8	22828	SR-related CTD associated factor 8	greenyellow	grey60
A_23_P67271	PKN1	5585	protein kinase N1	cyan	blue
A_33_P3247644	MTURN	222166	maturin, neural progenitor differentiation regulator homolog	purple	yellow
A_23_P375147	NA	NA	NA	purple	grey60
A_33_P3354851	NA	NA	NA	black	salmon
A_23_P370924	SMIM4	440957	small integral membrane protein 4	brown	brown
A_23_P341443	MNT	4335	MAX network transcriptional repressor	brown	turquoise
A_19_P00322357	NA	NA	NA	blue	greenyellow
A_33_P3403733	FAM231AP	729574	family with sequence similarity 231 member A, pseudogene	blue	white
A_24_P227927	IL21R	50615	interleukin 21 receptor	brown	turquoise
A_23_P102242	MARCH7	64844	membrane associated ring-CH-type finger 7	purple	midnightblue
A_23_P153256	ZNF773	374928	zinc finger protein 773	green	brown
A_33_P3315856	DHX34	9704	DExH-box helicase 34	midnightblue	turquoise
A_33_P3399107	PI4KA	5297	phosphatidylinositol 4-kinase alpha	cyan	yellow
A_33_P3424800	HLA-B	3106	major histocompatibility complex, class I, B	red	black
A_23_P8797	PMS2P2	5380	PMS1 homolog 2, mismatch repair system component pseudogene 2	purple	lightyellow
A_32_P22078	RPS9	6203	ribosomal protein S9	salmon	tan
A_24_P379104	PIM2	11040	Pim-2 proto-oncogene, serine/threonine kinase	cyan	green
A_23_P148919	CPT2	1376	carnitine palmitoyltransferase 2	pink	blue
A_23_P142031	SBK2	646643	SH3 domain binding kinase family member 2	black	salmon
A_21_P0009964	NA	NA	NA	blue	salmon
A_33_P3356325	ETV6	2120	ETS variant 6	pink	orange
A_33_P3363674	NFYC	4802	nuclear transcription factor Y subunit gamma	midnightblue	turquoise
A_21_P0010695	LINC00339	29092	long intergenic non-protein coding RNA 339	brown	turquoise
A_19_P00325015	TUG1	55000	taurine up-regulated 1 (non-protein coding)	greenyellow	grey60
A_23_P153586	UQCRFS1	7386	ubiquinol-cytochrome c reductase, Rieske iron-sulfur polypeptide 1	tan	darkturquoise
A_23_P92786	RBM27	54439	RNA binding motif protein 27	purple	midnightblue
A_23_P106835	BBS2	583	Bardet-Biedl syndrome 2	green	brown
A_23_P205738	BCL11B	64919	B cell CLL/lymphoma 11B	salmon	tan
A_33_P3333820	UBE2R2	54926	ubiquitin conjugating enzyme E2 R2	midnightblue	magenta
A_33_P3219596	MIR9-3HG	254559	MIR9-3 host gene	black	salmon
A_19_P00325912	HCG18	414777	HLA complex group 18 (non-protein coding)	salmon	tan
A_33_P3333033	NA	NA	NA	red	black
A_23_P300826	C6orf136	221545	chromosome 6 open reading frame 136	cyan	blue
A_19_P00322948	SNHG6	641638	small nucleolar RNA host gene 6	salmon	tan
A_21_P0007821	NA	NA	NA	turquoise	darkgreen
A_33_P3263379	SNORD17	692086	small nucleolar RNA, C/D box 17	magenta	turquoise
A_23_P253046	UGP2	7360	UDP-glucose pyrophosphorylase 2	greenyellow	grey60
A_33_P3396877	RPP38	10557	ribonuclease P/MRP subunit p38	purple	yellow
A_23_P115124	TRIM11	81559	tripartite motif containing 11	cyan	blue
A_24_P400376	CHCHD2	51142	coiled-coil-helix-coiled-coil-helix domain containing 2	red	black
A_23_P368278	FCHSD2	9873	FCH and double SH3 domains 2	greenyellow	grey60
A_24_P346886	NDUFB8	4714	NADH:ubiquinone oxidoreductase subunit B8	green	brown
A_33_P3375859	CXCR2P1	3580	C-X-C motif chemokine receptor 2 pseudogene 1	red	cyan
A_23_P122662	GFOD1	54438	glucose-fructose oxidoreductase domain containing 1	green	brown
A_23_P140760	ADGRG3	222487	adhesion G protein-coupled receptor G3	pink	purple
A_23_P45345	HTATSF1	27336	HIV-1 Tat specific factor 1	greenyellow	darkturquoise
A_24_P481783	UBAP1L	390595	ubiquitin associated protein 1 like	brown	brown
A_23_P202071	CELF2	10659	CUGBP Elav-like family member 2	tan	darkgreen
A_23_P41292	CTBP1	1487	C-terminal binding protein 1	brown	turquoise
A_23_P170733	ANTXR2	118429	anthrax toxin receptor 2	pink	magenta
A_24_P11131	SRRM1	10250	serine and arginine repetitive matrix 1	greenyellow	darkturquoise
A_32_P204218	FAM180A	389558	family with sequence similarity 180 member A	blue	greenyellow
A_24_P143686	SPIDR	23514	scaffold protein involved in DNA repair	cyan	green
A_33_P3390773	TRIM66	9866	tripartite motif containing 66	green	brown
A_23_P215875	DCAF13	25879	DDB1 and CUL4 associated factor 13	turquoise	royalblue
A_33_P3363460	NA	NA	NA	blue	white
A_33_P3272508	MRPL57	78988	mitochondrial ribosomal protein L57	red	lightcyan
A_23_P152234	CMTM2	146225	CKLF like MARVEL transmembrane domain containing 2	midnightblue	purple
A_33_P3267640	HGFAC	3083	HGF activator	blue	greenyellow
A_33_P3368500	IFT52	51098	intraflagellar transport 52	yellow	red
A_19_P00322299	ZSWIM6	57688	zinc finger SWIM-type containing 6	pink	orange
A_33_P3840630	FRYL	285527	FRY like transcription coactivator	magenta	lightcyan
A_24_P346368	TMEM248	55069	transmembrane protein 248	salmon	green
A_33_P3294017	HNRNPC	3183	heterogeneous nuclear ribonucleoprotein C (C1/C2)	tan	darkgreen
A_23_P91015	SMYD5	10322	SMYD family member 5	black	darkorange
A_24_P394533	NEU1	4758	neuraminidase 1	pink	purple
[truncated: 10,170 more rows]
