# Supplementary material for: Vitamins D2 and D3 have overlapping but different effects on human gene expression revealed through analysis of blood transcriptomes in a randomised double-blind placebo-controlled food-fortification trial
Source: medRxiv preprint, doi:10.1101/2020.12.16.20247700, version 2 (2021-02-22)
Supplement: Supplemental data file 8 [file 247700_file05.xlsx]

## Sheet: black
Cluster	ID	Description	GeneRatio	BgRatio	pvalue	p.adjust	qvalue	geneID	Count
black	GO:0022626	cytosolic ribosome	8/140	123/18698	4.03401e-06	0.00108515	0.00102761	RPL23A/RPS12/RPS3A/RPL22/RPSA/RPL17/RPL13AP3/RPL7	8
black	GO:0003735	structural constituent of ribosome	9/135	162/17548	4.51576e-06	0.00145859	0.00145859	RPL23A/RPS12/MRPS16/RPS3A/RPL22/RPSA/RPL17/RPL13AP3/RPL7	9
black	GO:0000956	nuclear-transcribed mRNA catabolic process	11/138	209/17653	7.62278e-07	0.00154514	0.00146518	RPL23A/RPS12/TUT4/RPS3A/EIF4B/RPL22/RPSA/RPL17/RPL7/TTC37/UPF1	11
black	GO:0044391	ribosomal subunit	9/140	193/18698	1.51036e-05	0.00203143	0.00192372	RPL23A/RPS12/MRPS16/RPS3A/RPL22/RPSA/RPL17/RPL13AP3/RPL7	9
black	GO:0044445	cytosolic part	10/140	255/18698	2.26602e-05	0.00203186	0.00192413	RPL23A/RPS12/PSMC1/RPS3A/RPL22/RPSA/CASP5/RPL17/RPL13AP3/RPL7	10
black	GO:0098760	response to interleukin-7	5/138	31/17653	3.91682e-06	0.00232092	0.00220082	CISH/BTK/HIST1H3A/HIST1H3E/STAT5B	5
black	GO:0098761	cellular response to interleukin-7	5/138	31/17653	3.91682e-06	0.00232092	0.00220082	CISH/BTK/HIST1H3A/HIST1H3E/STAT5B	5
black	GO:0000184	nuclear-transcribed mRNA catabolic process, nonsense-mediated decay	8/138	120/17653	4.58001e-06	0.00232092	0.00220082	RPL23A/RPS12/RPS3A/RPL22/RPSA/RPL17/RPL7/UPF1	8
black	GO:0006614	SRP-dependent cotranslational protein targeting to membrane	7/138	91/17653	7.17423e-06	0.00290843	0.00275793	RPL23A/RPS12/RPS3A/RPL22/RPSA/RPL17/RPL7	7
black	GO:0006613	cotranslational protein targeting to membrane	7/138	96/17653	1.02278e-05	0.00345528	0.00327648	RPL23A/RPS12/RPS3A/RPL22/RPSA/RPL17/RPL7	7
black	GO:0045047	protein targeting to ER	7/138	101/17653	1.42882e-05	0.00413747	0.00392336	RPL23A/RPS12/RPS3A/RPL22/RPSA/RPL17/RPL7	7
black	GO:0072599	establishment of protein localization to endoplasmic reticulum	7/138	105/17653	1.84243e-05	0.00460011	0.00436206	RPL23A/RPS12/RPS3A/RPL22/RPSA/RPL17/RPL7	7
black	GO:0006402	mRNA catabolic process	12/138	351/17653	2.04248e-05	0.00460011	0.00436206	RPL23A/RPS12/PSMC1/TUT4/RPS3A/EIF4B/RPL22/RPSA/RPL17/RPL7/TTC37/UPF1	12
black	GO:0005840	ribosome	9/140	242/18698	8.83584e-05	0.0059421	0.00562704	RPL23A/RPS12/MRPS16/RPS3A/RPL22/RPSA/RPL17/RPL13AP3/RPL7	9
black	GO:0022625	cytosolic large ribosomal subunit	5/140	68/18698	0.000156349	0.00841159	0.00796558	RPL23A/RPL22/RPL17/RPL13AP3/RPL7	5
black	GO:0006401	RNA catabolic process	12/138	384/17653	4.90501e-05	0.00994246	0.00942795	RPL23A/RPS12/PSMC1/TUT4/RPS3A/EIF4B/RPL22/RPSA/RPL17/RPL7/TTC37/UPF1	12
black	GO:0000788	nuclear nucleosome	4/140	40/18698	0.000223185	0.0100061	0.00947559	HIST1H3A/HIST1H3E/HIST1H4L/HIST1H4B	4
black	GO:0002181	cytoplasmic translation	6/138	88/17653	6.55555e-05	0.0120801	0.011455	UNK/RPS3A/EIF4B/RPL22/RPL17/RPL7	6
black	GO:0070972	protein localization to endoplasmic reticulum	7/138	131/17653	7.63461e-05	0.0128961	0.0122288	RPL23A/RPS12/RPS3A/RPL22/RPSA/RPL17/RPL7	7
black	GO:0038111	interleukin-7-mediated signaling pathway	4/138	30/17653	8.36686e-05	0.0130459	0.0123708	CISH/HIST1H3A/HIST1H3E/STAT5B	4
black	GO:0006335	DNA replication-dependent nucleosome assembly	4/138	32/17653	0.000108465	0.0146573	0.0138988	HIST1H3A/HIST1H3E/HIST1H4L/HIST1H4B	4
black	GO:0034723	DNA replication-dependent nucleosome organization	4/138	32/17653	0.000108465	0.0146573	0.0138988	HIST1H3A/HIST1H3E/HIST1H4L/HIST1H4B	4
black	GO:0016072	rRNA metabolic process	10/138	299/17653	0.000122534	0.0155236	0.0147202	RPL23A/RPS12/FRG1/RPS3A/NSA2/RPL22/RPSA/MARS/RPL17/RPL7	10
black	GO:0006413	translational initiation	8/138	195/17653	0.000149726	0.0178526	0.0169287	RPL23A/RPS12/RPS3A/EIF4B/RPL22/RPSA/RPL17/RPL7	8
black	GO:0000183	chromatin silencing at rDNA	4/138	39/17653	0.000237801	0.0256326	0.0243061	HIST1H3A/HIST1H3E/HIST1H4L/HIST1H4B	4
black	GO:0006364	rRNA processing	9/138	265/17653	0.000240266	0.0256326	0.0243061	RPL23A/RPS12/FRG1/RPS3A/NSA2/RPL22/RPSA/RPL17/RPL7	9
black	GO:0045652	regulation of megakaryocyte differentiation	5/138	76/17653	0.000321362	0.03257	0.0308846	HIST1H3A/HIST1H3E/HIST1H4L/HIST1H4B/KMT2C	5
black	GO:0000786	nucleosome	5/140	105/18698	0.00116129	0.0446267	0.0422605	HIST1H3A/HIST1H3E/HIST1H4L/HIST1H4B/HIST2H2AB	5
black	GO:0019083	viral transcription	7/138	176/17653	0.000470593	0.0454235	0.0430729	RPL23A/RPS12/RPS3A/RPL22/RPSA/RPL17/RPL7	7
black	GO:0002683	negative regulation of immune system process	11/138	426/17653	0.000525261	0.0469551	0.0445253	BTK/PTPRC/CD96/HIST1H4L/STAT5B/HIST1H4B/CD86/NME1/UFD1/CD300A/ID2	11
black	GO:0051290	protein heterotetramerization	4/138	48/17653	0.000532791	0.0469551	0.0445253	HIST1H3A/HIST1H3E/HIST1H4L/HIST1H4B	4
black	GO:0006612	protein targeting to membrane	7/138	182/17653	0.000574804	0.048547	0.0460347	RPL23A/RPS12/RPS3A/RPL22/RPSA/RPL17/RPL7	7

## Sheet: darkorange
Cluster	ID	Description	GeneRatio	BgRatio	pvalue	p.adjust	qvalue	geneID	Count
darkorange	GO:0043162	ubiquitin-dependent protein catabolic process via the multivesicular body sorting pathway	7/479	19/17653	3.93679e-07	0.00141961	0.00140108	HDAC6/VPS28/SNF8/VPS25/PTPN23/VPS4A/RNF126	7
darkorange	GO:0005759	mitochondrial matrix	30/497	453/18698	4.70017e-06	0.00238299	0.00217197	ACO2/BCKDHA/D2HGDH/PCCA/MRPL55/MRPL37/ATAD3A/AMT/CCAR2/ACADVL/NAXD/MRPS2/CS/ALKBH7/PAM16/ERAL1/SARS2/MRPS11/TARS2/MRPL4/MRPL45/NDUFS8/NUDT1/ACSF3/MRM1/POLDIP2/PDK2/MRPS12/BCKDK/ETHE1	30
darkorange	GO:0032984	protein-containing complex disassembly	24/479	314/17653	5.45675e-06	0.00983852	0.00971015	CARMIL2/HDAC6/TECPR1/SMARCD1/SPTAN1/CHMP1A/MRPL55/VCP/MRPL37/MICAL1/MRPS2/ADD1/ERAL1/MRPS11/GRWD1/MRPL4/MRPL45/WDR1/DVL2/VPS33A/VILL/VPS4A/MRPS12/TFIP11	24
darkorange	GO:0140030	modification-dependent protein binding	14/486	131/17548	1.64267e-05	0.0111045	0.0106514	HDAC6/CHD8/BRD4/PARP10/GLYR1/KAT8/VCP/BABAM2/UBXN1/PHF19/FAAP20/WDR81/TP53BP1/SGF29	14
darkorange	GO:0098798	mitochondrial protein complex	19/497	263/18698	8.40507e-05	0.0213068	0.0194201	BCKDHA/MRPL55/MRPL37/TIMM29/UQCRC1/MRPS2/NDUFA3/PAM16/MRPS11/MRPL4/MRPL45/NDUFS8/COX8A/DNAJC11/NDUFV1/ATP5MC2/PDK2/MRPS12/BCKDK	19
darkorange	GO:0051539	4 iron, 4 sulfur cluster binding	7/486	41/17548	0.000118957	0.0402075	0.0385672	ACO2/RTEL1/DDX11/CIAPIN1/CIAO3/NDUFS8/NDUFV1	7
darkorange	GO:0031593	polyubiquitin modification-dependent protein binding	7/486	45/17548	0.000218255	0.0423164	0.04059	HDAC6/PARP10/VCP/BABAM2/UBXN1/FAAP20/WDR81	7
darkorange	GO:0035497	cAMP response element binding	4/486	13/17548	0.000340537	0.0423164	0.04059	CREB3L2/CREB3/E4F1/CREB3L4	4
darkorange	GO:0042393	histone binding	15/486	194/17548	0.000340953	0.0423164	0.04059	CHD8/BRD4/VPS72/GLYR1/KAT8/PRMT7/PHF19/DAXX/TP53BP1/GRWD1/BAZ1B/NCAPD2/SGF29/NOC2L/SUPT6H	15
darkorange	GO:0016860	intramolecular oxidoreductase activity	7/486	49/17548	0.00037559	0.0423164	0.04059	P4HB/HYI/MPI/PTGDS/EBPL/PDIA5/GPI	7
darkorange	GO:0043130	ubiquitin binding	8/486	68/17548	0.000562394	0.0467262	0.0448199	HDAC6/VPS28/RBCK1/UBXN11/UBXN1/NPLOC4/FAAP20/HSPB1	8
darkorange	GO:0032182	ubiquitin-like protein binding	9/486	86/17548	0.000618629	0.0467262	0.0448199	HDAC6/VPS28/RBCK1/UBXN11/UBXN1/NPLOC4/DAXX/FAAP20/HSPB1	9
darkorange	GO:0015929	hexosaminidase activity	4/486	15/17548	0.000622094	0.0467262	0.0448199	NAGA/HYAL3/NAGLU/NAGPA	4

## Sheet: midnightblue
Cluster	ID	Description	GeneRatio	BgRatio	pvalue	p.adjust	qvalue	geneID	Count
midnightblue	GO:0060205	cytoplasmic vesicle lumen	26/336	338/18698	5.24209e-10	1.23173e-07	1.00255e-07	HSP90AA1/BIN2/EEF1A1/B2M/PSMA2/HSPH1/PPIA/FTL/PAFAH1B2/RNASE2/GMFG/RNASET2/GDI2/FAF2/KPNB1/ACTR2/PFKL/DDX3X/GSN/TMSB4X/SRGN/PSMB1/S100A9/XRCC5/PLAC8/RNASE3	26
midnightblue	GO:0031983	vesicle lumen	26/336	339/18698	5.58608e-10	1.23173e-07	1.00255e-07	HSP90AA1/BIN2/EEF1A1/B2M/PSMA2/HSPH1/PPIA/FTL/PAFAH1B2/RNASE2/GMFG/RNASET2/GDI2/FAF2/KPNB1/ACTR2/PFKL/DDX3X/GSN/TMSB4X/SRGN/PSMB1/S100A9/XRCC5/PLAC8/RNASE3	26
midnightblue	GO:0034774	secretory granule lumen	25/336	321/18698	8.82263e-10	1.29693e-07	1.05562e-07	HSP90AA1/BIN2/EEF1A1/B2M/PSMA2/PPIA/FTL/PAFAH1B2/RNASE2/GMFG/RNASET2/GDI2/FAF2/KPNB1/ACTR2/PFKL/DDX3X/GSN/TMSB4X/SRGN/PSMB1/S100A9/XRCC5/PLAC8/RNASE3	25
midnightblue	GO:1904813	ficolin-1-rich granule lumen	14/336	124/18698	5.12373e-08	5.64892e-06	4.59788e-06	HSP90AA1/BIN2/EEF1A1/PSMA2/PPIA/PAFAH1B2/GMFG/KPNB1/ACTR2/PFKL/DDX3X/GSN/PSMB1/FTH1	14
midnightblue	GO:0042611	MHC protein complex	7/336	25/18698	2.06884e-07	1.82471e-05	1.48521e-05	HLA-DQB1/HLA-C/B2M/HLA-B/HLA-DQA1/HLA-G/HLA-A	7
midnightblue	GO:0045335	phagocytic vesicle	13/336	124/18698	3.69669e-07	2.71707e-05	2.21153e-05	HLA-C/MYO1C/B2M/ACTG1/HLA-B/BECN1/VAMP3/TAP1/GSN/RAB32/ATP6V0E1/HLA-G/HLA-A	13
midnightblue	GO:0043312	neutrophil degranulation	29/321	485/17653	2.09769e-08	3.31916e-05	3.05859e-05	HSP90AA1/BIN2/EEF1A1/B2M/PSMA2/FCGR2A/PPIA/FTL/PAFAH1B2/RNASE2/GMFG/C3AR1/RNASET2/GDI2/FAF2/KPNB1/ATP11B/ACTR2/PFKL/DDX3X/GSN/PSMB1/DYNLL1/FTH1/S100A9/XRCC5/PLAC8/ADGRG3/RNASE3	29
midnightblue	GO:0002283	neutrophil activation involved in immune response	29/321	488/17653	2.40101e-08	3.31916e-05	3.05859e-05	HSP90AA1/BIN2/EEF1A1/B2M/PSMA2/FCGR2A/PPIA/FTL/PAFAH1B2/RNASE2/GMFG/C3AR1/RNASET2/GDI2/FAF2/KPNB1/ATP11B/ACTR2/PFKL/DDX3X/GSN/PSMB1/DYNLL1/FTH1/S100A9/XRCC5/PLAC8/ADGRG3/RNASE3	29
midnightblue	GO:0042119	neutrophil activation	29/321	498/17653	3.73492e-08	3.31916e-05	3.05859e-05	HSP90AA1/BIN2/EEF1A1/B2M/PSMA2/FCGR2A/PPIA/FTL/PAFAH1B2/RNASE2/GMFG/C3AR1/RNASET2/GDI2/FAF2/KPNB1/ATP11B/ACTR2/PFKL/DDX3X/GSN/PSMB1/DYNLL1/FTH1/S100A9/XRCC5/PLAC8/ADGRG3/RNASE3	29
midnightblue	GO:0002446	neutrophil mediated immunity	29/321	500/17653	4.07384e-08	3.31916e-05	3.05859e-05	HSP90AA1/BIN2/EEF1A1/B2M/PSMA2/FCGR2A/PPIA/FTL/PAFAH1B2/RNASE2/GMFG/C3AR1/RNASET2/GDI2/FAF2/KPNB1/ATP11B/ACTR2/PFKL/DDX3X/GSN/PSMB1/DYNLL1/FTH1/S100A9/XRCC5/PLAC8/ADGRG3/RNASE3	29
midnightblue	GO:0032993	protein-DNA complex	16/336	198/18698	6.17369e-07	3.88942e-05	3.16575e-05	RPA2/H3F3A/POT1/HIST1H2BG/HIST3H3/H2AFZ/NPM1/CDC5L/HIST2H3D/XRCC5/HIST1H3C/HIST1H2BI/HIST1H2BM/HIST1H3G/H2AFV/SHPRH	16
midnightblue	GO:0101002	ficolin-1-rich granule	15/336	185/18698	1.33064e-06	6.76556e-05	5.50676e-05	HSP90AA1/BIN2/EEF1A1/PSMA2/PPIA/PAFAH1B2/GMFG/KPNB1/ACTR2/PFKL/DDX3X/GSN/PSMB1/DYNLL1/FTH1	15
midnightblue	GO:0030139	endocytic vesicle	19/336	290/18698	1.38073e-06	6.76556e-05	5.50676e-05	HSP90AA1/HLA-DQB1/HLA-C/MYO1C/B2M/ACTG1/HSPH1/HLA-B/RAPGEF6/HLA-DQA1/BECN1/VAMP3/TAP1/UBC/GSN/RAB32/ATP6V0E1/HLA-G/HLA-A	19
midnightblue	GO:0000786	nucleosome	11/336	105/18698	2.96507e-06	0.000130759	0.00010643	H3F3A/HIST1H2BG/HIST3H3/H2AFZ/HIST2H3D/HIST1H3C/HIST1H2BI/HIST1H2BM/HIST1H3G/H2AFV/SHPRH	11
midnightblue	GO:0042605	peptide antigen binding	7/321	28/17548	5.46437e-07	0.000162243	0.000150181	HLA-DQB1/HLA-C/HLA-B/HLA-DQA1/TAP1/HLA-G/HLA-A	7
midnightblue	GO:0044389	ubiquitin-like protein ligase binding	21/321	323/17548	5.67284e-07	0.000162243	0.000150181	RPA2/TANK/JAK1/CASP8/STAT1/ZNF675/ACTG1/UBE2L3/MAP1LC3B/BECN1/FAF2/UBE2K/RPL5/UBC/YWHAZ/CACYBP/XRCC5/CUL1/CUL4B/SHPRH/TXNIP	21
midnightblue	GO:0030670	phagocytic vesicle membrane	9/336	72/18698	5.52299e-06	0.000205273	0.00016708	HLA-C/B2M/HLA-B/VAMP3/TAP1/RAB32/ATP6V0E1/HLA-G/HLA-A	9
midnightblue	GO:0044815	DNA packaging complex	11/336	112/18698	5.58566e-06	0.000205273	0.00016708	H3F3A/HIST1H2BG/HIST3H3/H2AFZ/HIST2H3D/HIST1H3C/HIST1H2BI/HIST1H2BM/HIST1H3G/H2AFV/SHPRH	11
midnightblue	GO:0031625	ubiquitin protein ligase binding	20/321	309/17548	1.13586e-06	0.000216571	0.000200469	RPA2/TANK/JAK1/CASP8/ZNF675/ACTG1/UBE2L3/MAP1LC3B/BECN1/FAF2/UBE2K/RPL5/UBC/YWHAZ/CACYBP/XRCC5/CUL1/CUL4B/SHPRH/TXNIP	20
midnightblue	GO:0034341	response to interferon-gamma	16/321	191/17653	4.38806e-07	0.000286013	0.00026356	HLA-DQB1/HLA-C/MYO1C/B2M/SP100/JAK1/STAT1/ACTG1/HLA-B/HLA-DQA1/ACTR2/VAMP3/GSN/HLA-G/NUB1/HLA-A	16
midnightblue	GO:0071346	cellular response to interferon-gamma	15/321	171/17653	5.59967e-07	0.000304156	0.000280278	HLA-DQB1/HLA-C/MYO1C/B2M/SP100/JAK1/STAT1/ACTG1/HLA-B/HLA-DQA1/ACTR2/VAMP3/GSN/HLA-G/HLA-A	15
midnightblue	GO:0071556	integral component of lumenal side of endoplasmic reticulum membrane	6/336	29/18698	1.07893e-05	0.000339863	0.000276628	HLA-DQB1/HLA-C/HLA-B/HLA-DQA1/HLA-G/HLA-A	6
midnightblue	GO:0098553	lumenal side of endoplasmic reticulum membrane	6/336	29/18698	1.07893e-05	0.000339863	0.000276628	HLA-DQB1/HLA-C/HLA-B/HLA-DQA1/HLA-G/HLA-A	6
midnightblue	GO:0012507	ER to Golgi transport vesicle membrane	8/336	62/18698	1.45362e-05	0.000427363	0.000347848	HLA-DQB1/HLA-C/B2M/SEC24D/HLA-B/HLA-DQA1/HLA-G/HLA-A	8
midnightblue	GO:0002474	antigen processing and presentation of peptide antigen via MHC class I	11/321	94/17653	1.09178e-06	0.000508303	0.000468399	HLA-C/B2M/PSMA2/SEC24D/ERAP2/HLA-B/VAMP3/TAP1/PSMB1/HLA-G/HLA-A	11
midnightblue	GO:0048002	antigen processing and presentation of peptide antigen	15/321	187/17653	1.74368e-06	0.000648881	0.000597941	HLA-DQB1/HLA-C/B2M/PSMA2/SEC24D/ERAP2/HLA-B/AP1S2/HLA-DQA1/VAMP3/TAP1/PSMB1/DYNLL1/HLA-G/HLA-A	15
midnightblue	GO:0071103	DNA conformation change	19/321	292/17653	1.79194e-06	0.000648881	0.000597941	H3F3A/POT1/HIST1H2BG/HIST3H3/NIPBL/DDX3X/NPM1/UBC/HIST2H3D/XRCC5/HIST1H3C/HIST1H2BI/HIST1H2BM/CHD2/HIST1H3G/CHD1/CUL4B/SHPRH/HNRNPA2B1	19
midnightblue	GO:0090150	establishment of protein localization to membrane	19/321	296/17653	2.19116e-06	0.000714099	0.00065804	HSP90AA1/MYO1C/HSPA4/CASP8/RPL17/RPS2/RPL29/RPL15/RPL21/SSR2/RPL5/VAMP3/ATG3/DYNLL1/ZDHHC20/YWHAZ/PDCD5/LYPLA1/SRP54	19
midnightblue	GO:0019882	antigen processing and presentation	16/321	221/17653	3.03301e-06	0.000898599	0.000828056	HLA-DQB1/HLA-C/B2M/PSMA2/SEC24D/ERAP2/HLA-B/AP1S2/HLA-DQA1/VAMP3/TAP1/RAB32/PSMB1/DYNLL1/HLA-G/HLA-A	16
midnightblue	GO:0030666	endocytic vesicle membrane	12/336	161/18698	3.54327e-05	0.000976615	0.000794906	HLA-DQB1/HLA-C/B2M/HLA-B/HLA-DQA1/VAMP3/TAP1/UBC/RAB32/ATP6V0E1/HLA-G/HLA-A	12
midnightblue	GO:0002478	antigen processing and presentation of exogenous peptide antigen	14/321	174/17653	3.72948e-06	0.00101287	0.000933352	HLA-DQB1/HLA-C/B2M/PSMA2/SEC24D/HLA-B/AP1S2/HLA-DQA1/VAMP3/TAP1/PSMB1/DYNLL1/HLA-G/HLA-A	14
midnightblue	GO:0060333	interferon-gamma-mediated signaling pathway	10/321	89/17653	4.90394e-06	0.00106546	0.000981821	HLA-DQB1/HLA-C/B2M/SP100/JAK1/STAT1/HLA-B/HLA-DQA1/HLA-G/HLA-A	10
midnightblue	GO:0060337	type I interferon signaling pathway	10/321	89/17653	4.90394e-06	0.00106546	0.000981821	HLA-C/PTPN11/SP100/JAK1/STAT1/HLA-B/UBE2K/HLA-G/HLA-A/CNOT7	10
midnightblue	GO:0071357	cellular response to type I interferon	10/321	89/17653	4.90394e-06	0.00106546	0.000981821	HLA-C/PTPN11/SP100/JAK1/STAT1/HLA-B/UBE2K/HLA-G/HLA-A/CNOT7	10
midnightblue	GO:0019884	antigen processing and presentation of exogenous antigen	14/321	181/17653	5.90487e-06	0.00120275	0.00110833	HLA-DQB1/HLA-C/B2M/PSMA2/SEC24D/HLA-B/AP1S2/HLA-DQA1/VAMP3/TAP1/PSMB1/DYNLL1/HLA-G/HLA-A	14
midnightblue	GO:0006401	RNA catabolic process	21/321	384/17653	7.97285e-06	0.00145712	0.00134273	PRPF18/PSMA2/ANP32A/RPL17/EIF4B/RPS2/RPL29/RPL15/PNRC1/RPL21/RNASE2/RNASET2/RPL5/NPM1/UBC/SSB/PSMB1/HNRNPC/YWHAZ/RNASE3/CNOT7	21
midnightblue	GO:0034340	response to type I interferon	10/321	94/17653	8.04794e-06	0.00145712	0.00134273	HLA-C/PTPN11/SP100/JAK1/STAT1/HLA-B/UBE2K/HLA-G/HLA-A/CNOT7	10
midnightblue	GO:0002479	antigen processing and presentation of exogenous peptide antigen via MHC class I, TAP-dependent	9/321	75/17653	8.50919e-06	0.00145955	0.00134497	HLA-C/B2M/PSMA2/HLA-B/VAMP3/TAP1/PSMB1/HLA-G/HLA-A	9
midnightblue	GO:0006605	protein targeting	22/321	419/17653	9.21802e-06	0.00150208	0.00138416	HSP90AA1/MYO1C/HSPA4/RPL17/RPS2/RPL29/UBE2L3/RPL15/RPL21/RNASE2/SSR2/RPL5/ATG3/GCC2/ZDHHC20/YWHAZ/UGCG/PLAGL2/TIMM23/PDCD5/LEPROT/SRP54	22
midnightblue	GO:0042590	antigen processing and presentation of exogenous peptide antigen via MHC class I	9/321	78/17653	1.17796e-05	0.00182809	0.00168458	HLA-C/B2M/PSMA2/HLA-B/VAMP3/TAP1/PSMB1/HLA-G/HLA-A	9
midnightblue	GO:0031492	nucleosomal DNA binding	7/321	45/17548	1.604e-05	0.00229371	0.00212318	H3F3A/HIST3H3/H2AFZ/HIST2H3D/HNRNPC/HIST1H3C/HIST1H3G	7
midnightblue	GO:0000781	chromosome, telomeric region	11/336	159/18698	0.000145549	0.00377571	0.0030732	SMCHD1/SP100/RPA2/H3F3A/PPP1CC/POT1/HIST3H3/SSB/NSMCE1/XRCC5/HNRNPA2B1	11
midnightblue	GO:0030660	Golgi-associated vesicle membrane	9/336	113/18698	0.000203543	0.00488935	0.00397964	HLA-DQB1/HLA-C/B2M/SEC24D/HLA-B/HLA-DQA1/HLA-G/HLA-A/RHOQ	9
midnightblue	GO:0030134	COPII-coated ER to Golgi transport vesicle	8/336	90/18698	0.000215674	0.00488935	0.00397964	HLA-DQB1/HLA-C/B2M/SEC24D/HLA-B/HLA-DQA1/HLA-G/HLA-A	8
midnightblue	GO:0044445	cytosolic part	14/336	255/18698	0.000223941	0.00488935	0.00397964	WASHC4/CASP8/PRDX3/RPL17/UCHL5/RPS2/RPL29/RPL15/RPL21/RPL5/PFKL/PYDC1/DDX3X/MRPS5	14
midnightblue	GO:0035578	azurophil granule lumen	8/336	91/18698	0.000232826	0.00488935	0.00397964	FTL/RNASE2/RNASET2/GDI2/FAF2/ACTR2/PLAC8/RNASE3	8
midnightblue	GO:0055038	recycling endosome membrane	7/336	72/18698	0.000307689	0.00616777	0.00502019	HLA-C/B2M/HLA-B/ATP11B/VAMP3/HLA-G/HLA-A	7
midnightblue	GO:0030176	integral component of endoplasmic reticulum membrane	10/336	148/18698	0.000350214	0.00671498	0.00546559	HLA-DQB1/HLA-C/HACD4/HLA-B/HLA-DQA1/TAP1/SACM1L/EMC4/HLA-G/HLA-A	10
midnightblue	GO:0000784	nuclear chromosome, telomeric region	9/336	124/18698	0.000407349	0.00748504	0.00609237	SMCHD1/SP100/RPA2/H3F3A/PPP1CC/POT1/HIST3H3/SSB/XRCC5	9
midnightblue	GO:0031227	intrinsic component of endoplasmic reticulum membrane	10/336	152/18698	0.00043296	0.00763741	0.00621639	HLA-DQB1/HLA-C/HACD4/HLA-B/HLA-DQA1/TAP1/SACM1L/EMC4/HLA-G/HLA-A	10
midnightblue	GO:0072655	establishment of protein localization to mitochondrion	13/321	192/17653	5.16924e-05	0.00765752	0.00705638	HSP90AA1/HSPA4/CASP8/HSPH1/UBE2L3/RNASE2/DYNLL1/YWHAZ/UGCG/PLAGL2/TIMM23/PDCD5/LEPROT	13
midnightblue	GO:0006413	translational initiation	13/321	195/17653	6.06313e-05	0.00823322	0.00758689	EIF4G2/EIF3F/RPL17/EIF4B/RPS2/RPL29/RPL15/RPL21/RPL5/CDC123/DDX3X/NPM1/EIF4H	13
midnightblue	GO:0070585	protein localization to mitochondrion	13/321	195/17653	6.06313e-05	0.00823322	0.00758689	HSP90AA1/HSPA4/CASP8/HSPH1/UBE2L3/RNASE2/DYNLL1/YWHAZ/UGCG/PLAGL2/TIMM23/PDCD5/LEPROT	13
midnightblue	GO:0005766	primary lysosome	10/336	155/18698	0.000505167	0.00825106	0.00671586	FTL/RNASE2/C3AR1/RNASET2/GDI2/FAF2/ATP11B/ACTR2/PLAC8/RNASE3	10
midnightblue	GO:0042582	azurophil granule	10/336	155/18698	0.000505167	0.00825106	0.00671586	FTL/RNASE2/C3AR1/RNASET2/GDI2/FAF2/ATP11B/ACTR2/PLAC8/RNASE3	10
midnightblue	GO:0032200	telomere organization	12/321	172/17653	7.50908e-05	0.00978884	0.00902038	HSP90AA1/SP100/RPA2/H3F3A/POT1/HIST3H3/HNRNPC/XRCC5/HIST1H3C/HIST1H3G/POLE4/HNRNPA2B1	12
midnightblue	GO:0033209	tumor necrosis factor-mediated signaling pathway	12/321	173/17653	7.93967e-05	0.00984549	0.00907259	PSMA2/CASP8/STAT1/ZNF675/TNFSF13B/KARS/PYDC1/UBC/TMSB4X/LIMS1/PSMB1/EDARADD	12
midnightblue	GO:0006402	mRNA catabolic process	18/321	351/17653	8.15674e-05	0.00984549	0.00907259	PRPF18/PSMA2/ANP32A/RPL17/EIF4B/RPS2/RPL29/RPL15/PNRC1/RPL21/RPL5/NPM1/UBC/SSB/PSMB1/HNRNPC/YWHAZ/CNOT7	18
midnightblue	GO:0043024	ribosomal small subunit binding	4/321	14/17548	9.51639e-05	0.00995783	0.0092175	EIF4B/DDX3X/NPM1/EIF4H	4
midnightblue	GO:0045296	cadherin binding	17/321	324/17548	0.000104453	0.00995783	0.0092175	RAB1A/USP8/EIF4G2/STAT1/RPS2/RPL29/RPL15/RAN/CLINT1/DDX3X/YWHAZ/HIST1H3C/CLIC1/LRRC59/HIST1H3G/EIF4H/MAPRE1	17
midnightblue	GO:0051262	protein tetramerization	11/321	151/17653	0.00010144	0.0115538	0.0106468	ADSL/NUDT21/S100A10/HIST3H3/ST13/DECR1/PFKL/HIST1H3C/HIST1H3G/ACOT13/GLS	11
midnightblue	GO:1903747	regulation of establishment of protein localization to mitochondrion	10/321	126/17653	0.000102811	0.0115538	0.0106468	CASP8/HSPH1/UBE2L3/RNASE2/DYNLL1/YWHAZ/UGCG/PLAGL2/PDCD5/LEPROT	10
midnightblue	GO:0042026	protein refolding	5/321	27/17653	0.000111964	0.012163	0.0112082	HSP90AA1/B2M/HSPA4/HSPH1/ST13	5
midnightblue	GO:0043209	myelin sheath	10/336	164/18698	0.000784058	0.0123489	0.0100513	HSP90AA1/EEF1A1/ATP5F1C/ATP5PB/PRDX3/ACTG1/GDI2/GLUL/GSN/LDHB	10
midnightblue	GO:0032392	DNA geometric change	8/321	85/17653	0.000156395	0.0164416	0.0151509	POT1/DDX3X/UBC/XRCC5/CHD2/CHD1/CUL4B/HNRNPA2B1	8
midnightblue	GO:0005769	early endosome	15/336	334/18698	0.00110941	0.0168706	0.0137317	RAB1A/USP8/HLA-C/B2M/WASHC4/WDFY1/PRDX3/HLA-B/RABGAP1L/ATP11B/RAB32/HLA-G/PTP4A2/CYTIP/HLA-A	15
midnightblue	GO:0006879	cellular iron ion homeostasis	7/321	65/17653	0.000173623	0.0176824	0.0162943	FTL/SKP1/UBC/ATP6V1G1/FTH1/CUL1/SMAD4	7
midnightblue	GO:0055072	iron ion homeostasis	8/321	87/17653	0.000184035	0.0181748	0.016748	B2M/FTL/SKP1/UBC/ATP6V1G1/FTH1/CUL1/SMAD4	8
midnightblue	GO:0070102	interleukin-6-mediated signaling pathway	4/321	17/17653	0.000211782	0.019565	0.0180291	PTPN11/JAK1/STAT1/SMAD4	4
midnightblue	GO:0060218	hematopoietic stem cell differentiation	9/321	113/17653	0.000221366	0.019565	0.0180291	H3F3A/PSMA2/UBC/PSMB1/HIST2H3D/XRCC5/HIST1H3C/CHD2/HIST1H3G	9
midnightblue	GO:1903749	positive regulation of establishment of protein localization to mitochondrion	9/321	113/17653	0.000221366	0.019565	0.0180291	CASP8/UBE2L3/RNASE2/DYNLL1/YWHAZ/UGCG/PLAGL2/PDCD5/LEPROT	9
midnightblue	GO:0065004	protein-DNA complex assembly	14/321	252/17653	0.000222125	0.019565	0.0180291	RPA2/H3F3A/HIST1H2BG/HIST3H3/CREB1/NPM1/UBC/HIST2H3D/HIST1H3C/HIST1H2BI/HIST1H2BM/HIST1H3G/CUL4B/SHPRH	14
midnightblue	GO:0031491	nucleosome binding	7/321	69/17548	0.000262174	0.0214234	0.0198306	H3F3A/HIST3H3/H2AFZ/HIST2H3D/HNRNPC/HIST1H3C/HIST1H3G	7
midnightblue	GO:0098687	chromosomal region	15/336	347/18698	0.00161671	0.0237657	0.0193438	SMCHD1/SP100/RPA2/H3F3A/CFDP1/PPP1CC/POT1/HIST3H3/SSB/PDS5A/DYNLL1/NSMCE1/XRCC5/HNRNPA2B1/STAG2	15
midnightblue	GO:0022626	cytosolic ribosome	8/336	123/18698	0.00172131	0.024487	0.019931	RPL17/RPS2/RPL29/RPL15/RPL21/RPL5/DDX3X/MRPS5	8
midnightblue	GO:0006334	nucleosome assembly	10/321	146/17653	0.000343366	0.0294482	0.0271364	H3F3A/HIST1H2BG/HIST3H3/NPM1/HIST2H3D/HIST1H3C/HIST1H2BI/HIST1H2BM/HIST1H3G/SHPRH	10
midnightblue	GO:0006613	cotranslational protein targeting to membrane	8/321	96/17653	0.000362718	0.0303102	0.0279307	RPL17/RPS2/RPL29/RPL15/RPL21/SSR2/RPL5/SRP54	8
midnightblue	GO:0032508	DNA duplex unwinding	7/321	75/17653	0.000424049	0.0345494	0.0318372	POT1/DDX3X/UBC/XRCC5/CHD2/CHD1/CUL4B	7
midnightblue	GO:0006612	protein targeting to membrane	11/321	182/17653	0.000513725	0.0408349	0.0376292	MYO1C/RPL17/RPS2/RPL29/RPL15/RPL21/SSR2/RPL5/ATG3/ZDHHC20/SRP54	11
midnightblue	GO:0015629	actin cytoskeleton	18/336	487/18698	0.00324803	0.0447618	0.0364334	MYO1C/BIN2/EEF1A1/ACTG1/RFLNB/STK17B/MYL12B/ACTR2/MYL12A/GSN/TMSB4X/CAVIN2/INTS6/HNRNPC/MAEA/CLIC5/RHOQ/MYL6	18
midnightblue	GO:0010008	endosome membrane	17/336	451/18698	0.00343334	0.0458819	0.0373451	USP8/HLA-DQB1/HLA-C/B2M/HLA-B/HLA-DQA1/ACAP2/BECN1/ATP11B/VAMP3/CD164/UBC/ATP6V0E1/HLA-G/LEPROT/TMEM106B/HLA-A	17
midnightblue	GO:0098505	G-rich strand telomeric DNA binding	3/321	10/17548	0.000661485	0.0472962	0.0437798	RPA2/POT1/HNRNPA2B1	3
midnightblue	GO:0030662	coated vesicle membrane	9/336	171/18698	0.00384448	0.0489321	0.0398278	HLA-DQB1/HLA-C/B2M/SEC24D/HLA-B/HLA-DQA1/VAMP3/HLA-G/HLA-A	9
midnightblue	GO:0044440	endosomal part	18/336	496/18698	0.00393007	0.0489321	0.0398278	USP8/HLA-DQB1/HLA-C/B2M/HLA-B/HLA-DQA1/ACAP2/BECN1/ATP11B/VAMP3/CD164/UBC/ATP6V0E1/CCZ1/HLA-G/LEPROT/TMEM106B/HLA-A	18
midnightblue	GO:0005775	vacuolar lumen	9/336	172/18698	0.00399446	0.0489321	0.0398278	HSP90AA1/FTL/RNASE2/RNASET2/GDI2/FAF2/ACTR2/PLAC8/RNASE3	9

## Sheet: purple
Cluster	ID	Description	GeneRatio	BgRatio	pvalue	p.adjust	qvalue	geneID	Count
purple	GO:0042119	neutrophil activation	68/338	498/17653	1.4086e-38	5.27945e-35	4.51346e-35	FCER1G/CPPED1/HSPA1A/ALOX5/PSEN1/CXCR1/ANXA3/GALNS/ITGAM/MAPK1/IGF2R/CLEC4D/PTPRJ/SDCBP/SLC2A3/TLR2/HSPA6/ADGRG3/NEU1/HPSE/MANBA/LILRB3/LAMP2/IL18RAP/PECAM1/SLC11A1/SELL/BRI3/PREX1/CYSTM1/PLAUR/ACAA1/GCA/IMPDH1/CD55/MGAM/SIGLEC5/ORM1/S100A11/ADGRE3/CD93/MME/SIRPA/ADAM8/CXCR2/MNDA/QPCT/SLC15A4/PYGL/CMTM6/CANT1/FPR1/BST1/ALDH3B1/S100A12/CEACAM3/FPR2/ARHGAP9/ITGAX/PADI2/FCGR2B/ANPEP/LILRB2/LRG1/VAPA…	68
purple	GO:0002283	neutrophil activation involved in immune response	65/338	488/17653	3.60859e-36	6.7625e-33	5.78134e-33	FCER1G/CPPED1/HSPA1A/ALOX5/PSEN1/CXCR1/ANXA3/GALNS/ITGAM/MAPK1/IGF2R/CLEC4D/PTPRJ/SDCBP/SLC2A3/TLR2/HSPA6/ADGRG3/NEU1/HPSE/MANBA/LILRB3/LAMP2/PECAM1/SLC11A1/SELL/BRI3/CYSTM1/PLAUR/ACAA1/GCA/IMPDH1/CD55/MGAM/SIGLEC5/ORM1/S100A11/ADGRE3/CD93/MME/SIRPA/ADAM8/CXCR2/MNDA/QPCT/SLC15A4/PYGL/CMTM6/CANT1/FPR1/BST1/ALDH3B1/S100A12/CEACAM3/FPR2/ARHGAP9/ITGAX/PADI2/ANPEP/LILRB2/LRG1/VAPA/LILRA2/MMP25/RAB24	65
purple	GO:0043312	neutrophil degranulation	64/338	485/17653	2.34919e-35	2.93492e-32	2.5091e-32	FCER1G/CPPED1/HSPA1A/ALOX5/PSEN1/CXCR1/ANXA3/GALNS/ITGAM/MAPK1/IGF2R/CLEC4D/PTPRJ/SDCBP/SLC2A3/TLR2/HSPA6/ADGRG3/NEU1/HPSE/MANBA/LILRB3/LAMP2/PECAM1/SLC11A1/SELL/BRI3/CYSTM1/PLAUR/ACAA1/GCA/IMPDH1/CD55/MGAM/SIGLEC5/ORM1/S100A11/ADGRE3/CD93/MME/SIRPA/ADAM8/CXCR2/MNDA/QPCT/SLC15A4/PYGL/CMTM6/CANT1/FPR1/BST1/ALDH3B1/S100A12/CEACAM3/FPR2/ARHGAP9/ITGAX/PADI2/ANPEP/LILRB2/LRG1/VAPA/MMP25/RAB24	64
purple	GO:0002446	neutrophil mediated immunity	64/338	500/17653	1.49227e-34	1.39826e-31	1.19539e-31	FCER1G/CPPED1/HSPA1A/ALOX5/PSEN1/CXCR1/ANXA3/GALNS/ITGAM/MAPK1/IGF2R/CLEC4D/PTPRJ/SDCBP/SLC2A3/TLR2/HSPA6/ADGRG3/NEU1/HPSE/MANBA/LILRB3/LAMP2/PECAM1/SLC11A1/SELL/BRI3/CYSTM1/PLAUR/ACAA1/GCA/IMPDH1/CD55/MGAM/SIGLEC5/ORM1/S100A11/ADGRE3/CD93/MME/SIRPA/ADAM8/CXCR2/MNDA/QPCT/SLC15A4/PYGL/CMTM6/CANT1/FPR1/BST1/ALDH3B1/S100A12/CEACAM3/FPR2/ARHGAP9/ITGAX/PADI2/ANPEP/LILRB2/LRG1/VAPA/MMP25/RAB24	64
purple	GO:0030667	secretory granule membrane	43/354	303/18698	3.034e-25	1.10438e-22	9.22975e-23	FCER1G/PSEN1/CXCR1/ITGAM/IGF2R/CLEC4D/PTPRJ/SLC2A3/TLR2/ADGRG3/MANBA/LILRB3/STX3/LAMP2/PECAM1/SLC11A1/SELL/BRI3/CYSTM1/PLAUR/CD55/MGAM/SIGLEC5/ADGRE3/CD93/MME/SIRPA/ADAM8/CXCR2/SLC15A4/CA4/CMTM6/FPR1/BST1/ALDH3B1/CEACAM3/FPR2/ITGAX/ANPEP/LILRB2/VAPA/MMP25/RAB24	43
purple	GO:0101002	ficolin-1-rich granule	26/354	185/18698	1.46545e-15	2.66711e-13	2.22902e-13	FCER1G/HSPA1A/ALOX5/MAPK1/CLEC4D/SLC2A3/HSPA6/LAMP2/SLC11A1/IMPDH1/CD55/MGAM/SIGLEC5/ADGRE3/CD93/SIRPA/ADAM8/MNDA/QPCT/PYGL/CANT1/FPR1/FPR2/ITGAX/LILRB2/LRG1	26
purple	GO:0042581	specific granule	24/354	160/18698	4.15257e-15	5.03845e-13	4.21085e-13	ANXA3/ITGAM/CLEC4D/PTPRJ/SLC2A3/ADGRG3/NEU1/HPSE/STX3/PLAUR/ACAA1/ORM1/CD93/ADAM8/QPCT/SLC15A4/CMTM6/CANT1/BST1/ALDH3B1/CEACAM3/FPR2/LRG1/MMP25	24
purple	GO:0101003	ficolin-1-rich granule membrane	16/354	61/18698	1.82059e-14	1.65673e-12	1.3846e-12	FCER1G/CLEC4D/SLC2A3/LAMP2/SLC11A1/CD55/MGAM/SIGLEC5/ADGRE3/CD93/SIRPA/ADAM8/FPR1/FPR2/ITGAX/LILRB2	16
purple	GO:0070820	tertiary granule	23/354	164/18698	6.91836e-14	5.03657e-12	4.20928e-12	FCER1G/ITGAM/CLEC4D/SLC2A3/LAMP2/SLC11A1/CYSTM1/CD55/MGAM/SIGLEC5/ORM1/ADGRE3/CD93/SIRPA/ADAM8/QPCT/CANT1/FPR1/FPR2/ITGAX/STX7/LILRB2/LRG1	23
purple	GO:0070821	tertiary granule membrane	14/354	73/18698	7.93019e-11	4.81098e-09	4.02075e-09	FCER1G/ITGAM/CLEC4D/SLC2A3/SLC11A1/CYSTM1/MGAM/SIGLEC5/CD93/SIRPA/ADAM8/FPR2/ITGAX/LILRB2	14
purple	GO:0035579	specific granule membrane	15/354	91/18698	1.59646e-10	8.30159e-09	6.938e-09	ITGAM/CLEC4D/PTPRJ/SLC2A3/ADGRG3/PLAUR/CD93/ADAM8/SLC15A4/CMTM6/BST1/ALDH3B1/CEACAM3/FPR2/MMP25	15
purple	GO:0005774	vacuolar membrane	30/354	414/18698	3.58162e-10	1.62963e-08	1.36196e-08	PSEN1/IGF2R/NEU1/HPSE/MANBA/LAMP2/BRI3/SH3GLB1/PLEKHM1/TLR8/ATP6V1B2/RRAGD/GABARAPL1/ULK1/SLC15A4/CMTM6/ATG16L2/FPR1/TMEM50A/ECE1/RNF13/LITAF/SORT1/ANPEP/VMP1/STX7/AP5B1/FLOT1/VAPA/KIAA1324	30
purple	GO:0005766	primary lysosome	17/354	155/18698	6.39844e-09	2.32903e-07	1.94647e-07	CPPED1/PSEN1/GALNS/MAPK1/SDCBP/MANBA/STX3/LAMP2/BRI3/GCA/IMPDH1/MNDA/CMTM6/FPR1/PADI2/STX7/VAPA	17
purple	GO:0042582	azurophil granule	17/354	155/18698	6.39844e-09	2.32903e-07	1.94647e-07	CPPED1/PSEN1/GALNS/MAPK1/SDCBP/MANBA/STX3/LAMP2/BRI3/GCA/IMPDH1/MNDA/CMTM6/FPR1/PADI2/STX7/VAPA	17
purple	GO:0005765	lysosomal membrane	23/354	355/18698	3.2685e-07	9.91446e-06	8.28594e-06	PSEN1/IGF2R/NEU1/HPSE/MANBA/LAMP2/BRI3/PLEKHM1/TLR8/ATP6V1B2/SLC15A4/CMTM6/FPR1/ECE1/RNF13/LITAF/SORT1/ANPEP/STX7/AP5B1/FLOT1/VAPA/KIAA1324	23
purple	GO:0098852	lytic vacuole membrane	23/354	355/18698	3.2685e-07	9.91446e-06	8.28594e-06	PSEN1/IGF2R/NEU1/HPSE/MANBA/LAMP2/BRI3/PLEKHM1/TLR8/ATP6V1B2/SLC15A4/CMTM6/FPR1/ECE1/RNF13/LITAF/SORT1/ANPEP/STX7/AP5B1/FLOT1/VAPA/KIAA1324	23
purple	GO:0002521	leukocyte differentiation	30/338	483/17653	1.62749e-08	1.21997e-05	1.04296e-05	PLCG2/FCER1G/PSEN1/RASSF2/FOS/CLEC4D/TLR2/ADGRG3/EP300/LILRB3/FUT7/PREX1/LYN/CEBPB/NLRP3/ADAM8/PKNOX1/TFE3/BCL6/STAT3/IL18R1/JUNB/FCGR2B/HLX/TMEM176B/LILRB2/SEMA4A/GAB2/ATP7A/SNX10	30
purple	GO:0002286	T cell activation involved in immune response	13/338	96/17653	3.5708e-08	2.23056e-05	1.90693e-05	FCER1G/PSEN1/CLEC4D/SLC11A1/APBB1IP/NLRP3/BCL6/STAT3/IL18R1/FCGR2B/HLX/SEMA4A/ATP7A	13
purple	GO:0034774	secretory granule lumen	21/354	321/18698	9.16105e-07	2.56509e-05	2.14376e-05	CPPED1/ALOX5/GALNS/MAPK1/SDCBP/HSPA6/NEU1/HPSE/ACAA1/GCA/IMPDH1/ORM1/S100A11/MNDA/QPCT/PYGL/CANT1/S100A12/ARHGAP9/PADI2/LRG1	21
purple	GO:0005775	vacuolar lumen	15/354	172/18698	1.01382e-06	2.63593e-05	2.20296e-05	CPPED1/GALNS/VCAN/MAPK1/SDCBP/NEU1/HPSE/MANBA/LAMP2/GCA/IMPDH1/NAAA/MNDA/DAPK2/PADI2	15
purple	GO:0005776	autophagosome	11/354	92/18698	1.31155e-06	3.18269e-05	2.65991e-05	LAMP2/TRIM21/SH3GLB1/TBC1D14/GABARAPL1/ULK1/ATG16L2/DAPK2/NRBF2/VMP1/RAB24	11
purple	GO:0098857	membrane microdomain	20/354	303/18698	1.45498e-06	3.31009e-05	2.76639e-05	PSEN1/ITGAM/MAPK1/SDCBP/TLR2/HPSE/LAMP2/PECAM1/LYN/CD55/PACSIN2/CTNNA1/LCP2/LTB4R/TLR6/CFLAR/CBL/FLOT1/ATP7A/KCNE3	20
purple	GO:0060205	cytoplasmic vesicle lumen	21/354	338/18698	2.09213e-06	4.43328e-05	3.70509e-05	CPPED1/ALOX5/GALNS/MAPK1/SDCBP/HSPA6/NEU1/HPSE/ACAA1/GCA/IMPDH1/ORM1/S100A11/MNDA/QPCT/PYGL/CANT1/S100A12/ARHGAP9/PADI2/LRG1	21
purple	GO:0031983	vesicle lumen	21/354	339/18698	2.19228e-06	4.43328e-05	3.70509e-05	CPPED1/ALOX5/GALNS/MAPK1/SDCBP/HSPA6/NEU1/HPSE/ACAA1/GCA/IMPDH1/ORM1/S100A11/MNDA/QPCT/PYGL/CANT1/S100A12/ARHGAP9/PADI2/LRG1	21
purple	GO:0098589	membrane region	20/354	314/18698	2.51475e-06	4.81773e-05	4.02639e-05	PSEN1/ITGAM/MAPK1/SDCBP/TLR2/HPSE/LAMP2/PECAM1/LYN/CD55/PACSIN2/CTNNA1/LCP2/LTB4R/TLR6/CFLAR/CBL/FLOT1/ATP7A/KCNE3	20
purple	GO:0045121	membrane raft	19/354	302/18698	5.36317e-06	9.76098e-05	8.15767e-05	PSEN1/ITGAM/MAPK1/SDCBP/TLR2/HPSE/PECAM1/LYN/CD55/PACSIN2/CTNNA1/LCP2/LTB4R/TLR6/CFLAR/CBL/FLOT1/ATP7A/KCNE3	19
purple	GO:0045088	regulation of innate immune response	26/338	427/17653	2.25205e-07	0.000120581	0.000103086	PLCG2/FCER1G/RAF1/HSPA1A/ITGAM/ICAM3/CLEC4D/TLR2/EP300/IL18RAP/LYN/TLR8/SEC14L1/ADAM8/IFNGR2/NECTIN2/SOCS3/TLR5/FFAR2/LILRA4/TLR6/RPS6KA5/FCGR2B/IRAK3/FLOT1/LILRA2	26
purple	GO:0045089	positive regulation of innate immune response	23/338	353/17653	3.52644e-07	0.000154142	0.000131778	PLCG2/FCER1G/RAF1/HSPA1A/ITGAM/ICAM3/CLEC4D/TLR2/EP300/IL18RAP/LYN/TLR8/SEC14L1/ADAM8/NECTIN2/TLR5/FFAR2/LILRA4/TLR6/RPS6KA5/IRAK3/FLOT1/LILRA2	23
purple	GO:0030595	leukocyte chemotaxis	17/338	202/17653	3.70139e-07	0.000154142	0.000131778	FCER1G/CXCR1/PREX1/LYN/ADGRE2/CCL3L3/RIPOR2/ADAM8/CXCR2/FFAR2/BST1/DAPK2/S100A12/FPR2/CSF3R/TNFSF14/PADI2	17
purple	GO:0002758	innate immune response-activating signal transduction	20/338	283/17653	5.85984e-07	0.000219627	0.000187762	PLCG2/FCER1G/RAF1/HSPA1A/ITGAM/ICAM3/CLEC4D/TLR2/EP300/LYN/TLR8/SEC14L1/TLR5/FFAR2/LILRA4/TLR6/RPS6KA5/IRAK3/FLOT1/LILRA2	20
purple	GO:0042110	T cell activation	26/338	463/17653	1.05186e-06	0.000358396	0.000306397	FCER1G/PSEN1/CLEC4D/FKBP1A/FUT7/SLC11A1/PREX1/LYN/CEBPB/CD55/APBB1IP/TREML2/SIRPA/NLRP3/RIPOR2/ADAM8/PKNOX1/BCL6/STAT3/TNFSF14/IL18R1/FCGR2B/HLX/LILRB2/SEMA4A/ATP7A	26
purple	GO:0031349	positive regulation of defense response	26/338	466/17653	1.1866e-06	0.000370616	0.000316844	PLCG2/FCER1G/RAF1/HSPA1A/ITGAM/ICAM3/CLEC4D/TLR2/EP300/IL18RAP/LYN/TLR8/SEC14L1/CCL3L3/ADAM8/NECTIN2/TLR5/FFAR2/S100A12/LILRA4/TLR6/OSM/RPS6KA5/IRAK3/FLOT1/LILRA2	26
purple	GO:0050900	leukocyte migration	26/338	470/17653	1.39103e-06	0.000401045	0.000342858	FCER1G/CXCR1/ITGAM/FUT7/PECAM1/SELL/PREX1/LYN/ADGRE2/CCL3L3/SIRPA/RIPOR2/ADAM8/TREM1/CXCR2/FPR1/FFAR2/BST1/DAPK2/S100A12/CEACAM3/FPR2/CSF3R/TNFSF14/ITGAX/PADI2	26
purple	GO:0002218	activation of innate immune response	20/338	301/17653	1.53524e-06	0.000411006	0.000351374	PLCG2/FCER1G/RAF1/HSPA1A/ITGAM/ICAM3/CLEC4D/TLR2/EP300/LYN/TLR8/SEC14L1/TLR5/FFAR2/LILRA4/TLR6/RPS6KA5/IRAK3/FLOT1/LILRA2	20
purple	GO:0000421	autophagosome membrane	6/354	32/18698	2.63852e-05	0.000457344	0.000382222	LAMP2/SH3GLB1/GABARAPL1/ULK1/ATG16L2/VMP1	6
purple	GO:0002292	T cell differentiation involved in immune response	9/338	61/17653	2.24531e-06	0.000561029	0.000479631	FCER1G/CLEC4D/NLRP3/BCL6/STAT3/IL18R1/HLX/SEMA4A/ATP7A	9
purple	GO:0002285	lymphocyte activation involved in immune response	14/338	162/17653	2.92529e-06	0.00063065	0.00053915	PLCG2/FCER1G/PSEN1/CLEC4D/SLC11A1/APBB1IP/NLRP3/BCL6/STAT3/IL18R1/FCGR2B/HLX/SEMA4A/ATP7A	14
purple	GO:1990266	neutrophil migration	11/338	99/17653	3.02603e-06	0.00063065	0.00053915	FCER1G/PECAM1/PREX1/CCL3L3/RIPOR2/ADAM8/CXCR2/BST1/DAPK2/S100A12/CSF3R	11
purple	GO:0097530	granulocyte migration	12/338	119/17653	3.02873e-06	0.00063065	0.00053915	FCER1G/PECAM1/PREX1/ADGRE2/CCL3L3/RIPOR2/ADAM8/CXCR2/BST1/DAPK2/S100A12/CSF3R	12
purple	GO:0060326	cell chemotaxis	18/338	273/17653	5.72459e-06	0.00112925	0.000965409	FCER1G/CXCR1/PREX1/LYN/ADGRE2/CCL3L3/RIPOR2/ADAM8/CXCR2/FPR1/FFAR2/BST1/DAPK2/S100A12/FPR2/CSF3R/TNFSF14/PADI2	18
purple	GO:0002768	immune response-regulating cell surface receptor signaling pathway	25/338	482/17653	6.91667e-06	0.00129618	0.00110812	PLCG2/FCER1G/RAF1/PSEN1/FCGR3A/MAPK1/ICAM3/FOS/CLEC4D/PTPRJ/EP300/LYN/NECTIN2/MNDA/LCP2/FPR1/FFAR2/FPR2/LILRA4/RPS6KA5/FCGR2B/ARPC4/LILRB2/LILRA2/GAB2	25
purple	GO:0097529	myeloid leukocyte migration	14/338	177/17653	8.2125e-06	0.00146574	0.00125308	FCER1G/PECAM1/PREX1/LYN/ADGRE2/CCL3L3/RIPOR2/ADAM8/CXCR2/BST1/DAPK2/S100A12/FPR2/CSF3R	14
purple	GO:0035577	azurophil granule membrane	7/354	58/18698	0.000107759	0.00172199	0.00143914	PSEN1/MANBA/LAMP2/BRI3/CMTM6/FPR1/VAPA	7
purple	GO:0005767	secondary lysosome	4/354	14/18698	0.000108807	0.00172199	0.00143914	LAMP2/NCF2/ADAM8/NCF1	4
purple	GO:0035710	CD4-positive, alpha-beta T cell activation	9/338	73/17653	1.02758e-05	0.00175061	0.00149662	FUT7/CD55/NLRP3/BCL6/STAT3/IL18R1/HLX/SEMA4A/ATP7A	9
purple	GO:0071219	cellular response to molecule of bacterial origin	14/338	182/17653	1.12983e-05	0.00181943	0.00155545	MAPK1/TLR2/LYN/CEBPB/CD55/NLRP3/TLR5/CARD16/LITAF/TLR6/FCGR2B/LILRB2/LILRA2/ZFP36	14
purple	GO:0002237	response to molecule of bacterial origin	20/338	345/17653	1.19239e-05	0.00181943	0.00155545	PLCG2/MAPK1/FOS/TLR2/SLC11A1/ALPL/LYN/CEBPB/CD55/NLRP3/TLR5/CARD16/LITAF/TLR6/JUNB/FCGR2B/IRAK3/LILRB2/LILRA2/ZFP36	20
purple	GO:0045576	mast cell activation	8/338	57/17653	1.2136e-05	0.00181943	0.00155545	FCER1G/LYN/ADGRE2/NECTIN2/LCP2/S100A12/CBL/GAB2	8
purple	GO:0045335	phagocytic vesicle	10/354	124/18698	0.000125806	0.00183174	0.00153087	ANXA3/TLR2/LAMP2/SLC11A1/VAMP3/NCF2/ADAM8/NCF1/TLR6/ATP7A	10
purple	GO:1904813	ficolin-1-rich granule lumen	10/354	124/18698	0.000125806	0.00183174	0.00153087	HSPA1A/ALOX5/MAPK1/HSPA6/IMPDH1/MNDA/QPCT/PYGL/CANT1/LRG1	10
purple	GO:0030139	endocytic vesicle	16/354	290/18698	0.000139947	0.00195926	0.00163744	ANXA3/IGF2R/TLR2/LAMP2/SLC11A1/VAMP3/NCF2/ADAM8/NCF1/DYSF/TLR6/PICALM/STX7/ATP7A/RAB24/LPAR2	16
purple	GO:0001819	positive regulation of cytokine production	22/338	411/17653	1.5304e-05	0.00220613	0.00188604	PLCG2/FCER1G/HSPA1A/TLR2/EP300/HPSE/SLC11A1/TLR8/CEBPB/ORM1/SEC14L1/LRRFIP1/CYP1B1/NLRP3/ADAM8/TLR5/FFAR2/TLR6/IL18R1/IL1RAP/LILRB2/FLOT1	22
purple	GO:0035580	specific granule lumen	7/354	62/18698	0.000165214	0.00222733	0.00186147	NEU1/HPSE/ACAA1/ORM1/QPCT/CANT1/LRG1	7
purple	GO:0051092	positive regulation of NF-kappaB transcription factor activity	12/338	141/17653	1.74669e-05	0.00239308	0.00204588	HSPA1A/TLR2/TRIM8/NLRP3/ADAM8/CARD16/S100A12/TLR6/CFLAR/IL1RAP/RPS6KA5/IRAK3	12
purple	GO:0034121	regulation of toll-like receptor signaling pathway	8/338	60/17653	1.78779e-05	0.00239308	0.00204588	TLR2/LYN/TLR5/LILRA4/TLR6/IRAK3/FLOT1/LILRA2	8
purple	GO:0032635	interleukin-6 production	11/338	120/17653	1.95012e-05	0.00252036	0.00215469	FCER1G/TLR2/IL18RAP/TLR8/CEBPB/ORM1/TLR6/IL1RAP/IRAK3/LILRB2/LILRA2	11
purple	GO:0051091	positive regulation of DNA binding transcription factor activity	16/338	245/17653	2.12973e-05	0.00261998	0.00223985	HSPA1A/ANXA3/TLR2/EP300/TRIM8/TRIM21/NLRP3/ADAM8/CARD16/S100A12/TLR6/CFLAR/IL1RAP/RPS6KA5/IRAK3/PTEN	16
purple	GO:0006909	phagocytosis	19/338	330/17653	2.16701e-05	0.00261998	0.00223985	PLCG2/FCER1G/ANXA3/ITGAM/FCGR3A/MAPK1/ICAM3/TLR2/PECAM1/SLC11A1/LYN/CD93/NCF2/SIRPA/CD302/FCGR2B/ARPC4/PTEN/CDC42SE1	19
purple	GO:0061900	glial cell activation	6/338	31/17653	2.31609e-05	0.00271272	0.00231913	PSEN1/ITGAM/TLR2/TLR8/FPR2/TLR6	6
purple	GO:0050663	cytokine secretion	14/338	196/17653	2.6033e-05	0.00292083	0.00249705	TLR2/LYN/TLR8/IL1R2/ORM1/NLRP3/LCP2/TLR5/FFAR2/CARD16/S100A12/TLR6/IL1RAP/FCGR2B	14
purple	GO:0002683	negative regulation of immune system process	22/338	426/17653	2.64963e-05	0.00292083	0.00249705	FCER1G/PTPRJ/LILRB3/LYN/CEBPB/CD55/SEC14L1/NLRP3/RIPOR2/CXCR2/MNDA/BCL6/LILRA4/TLR6/PADI2/FCGR2B/HLX/TMEM176B/IRAK3/LILRB2/LILRA2/ZFP36	22
purple	GO:0043367	CD4-positive, alpha-beta T cell differentiation	8/338	64/17653	2.89398e-05	0.00309904	0.0026494	FUT7/NLRP3/BCL6/STAT3/IL18R1/HLX/SEMA4A/ATP7A	8
purple	GO:0042116	macrophage activation	8/338	65/17653	3.24584e-05	0.00337928	0.00288898	ITGAM/TLR2/SLC11A1/TLR8/CD93/FPR2/TLR6/FCGR2B	8
purple	GO:0071621	granulocyte chemotaxis	10/338	105/17653	3.34235e-05	0.00338571	0.00289449	FCER1G/PREX1/ADGRE2/CCL3L3/RIPOR2/CXCR2/BST1/DAPK2/S100A12/CSF3R	10
purple	GO:0002367	cytokine production involved in immune response	9/338	85/17653	3.56406e-05	0.00349118	0.00298465	FCER1G/TLR2/IL18RAP/SLC11A1/CD55/NLRP3/FFAR2/BCL6/IRAK3	9
purple	GO:0006801	superoxide metabolic process	8/338	66/17653	3.63276e-05	0.00349118	0.00298465	ITGAM/PREX1/NCF2/NCF1/BST1/FPR2/SOD2/ATP7A	8
purple	GO:0071216	cellular response to biotic stimulus	14/338	204/17653	4.04993e-05	0.00370912	0.00317098	MAPK1/TLR2/LYN/CEBPB/CD55/NLRP3/TLR5/CARD16/LITAF/TLR6/FCGR2B/LILRB2/LILRA2/ZFP36	14
purple	GO:0032418	lysosome localization	8/338	67/17653	4.05747e-05	0.00370912	0.00317098	FCER1G/KIF1B/PLEKHM1/LYN/ADGRE2/NDEL1/CBL/GAB2	8
purple	GO:0030593	neutrophil chemotaxis	9/338	88/17653	4.70352e-05	0.00415078	0.00354855	FCER1G/PREX1/CCL3L3/RIPOR2/CXCR2/BST1/DAPK2/S100A12/CSF3R	9
purple	GO:0002221	pattern recognition receptor signaling pathway	13/338	181/17653	4.7621e-05	0.00415078	0.00354855	HSPA1A/ITGAM/TLR2/LYN/TLR8/SEC14L1/TLR5/FFAR2/LILRA4/TLR6/IRAK3/FLOT1/LILRA2	13
purple	GO:0035578	azurophil granule lumen	8/354	91/18698	0.000330662	0.0042986	0.00359253	CPPED1/GALNS/MAPK1/SDCBP/GCA/IMPDH1/MNDA/PADI2	8
purple	GO:0051090	regulation of DNA binding transcription factor activity	21/338	416/17653	5.60733e-05	0.00471238	0.00402867	HSPA1A/ANXA3/MAPK1/FOS/TLR2/ADGRG3/EP300/TRIM8/TRIM21/IFRD1/CYP1B1/NLRP3/ADAM8/CARD16/S100A12/TLR6/CFLAR/IL1RAP/RPS6KA5/IRAK3/PTEN	21
purple	GO:0042093	T-helper cell differentiation	7/338	52/17653	5.65788e-05	0.00471238	0.00402867	NLRP3/BCL6/STAT3/IL18R1/HLX/SEMA4A/ATP7A	7
purple	GO:0030670	phagocytic vesicle membrane	7/354	72/18698	0.000421106	0.00511546	0.00427521	ANXA3/TLR2/LAMP2/SLC11A1/VAMP3/TLR6/ATP7A	7
purple	GO:0031252	cell leading edge	18/354	385/18698	0.000421604	0.00511546	0.00427521	TNFRSF12A/PTPRJ/FGD4/STX3/S100A6/ATP6V1B2/S100A11/ADGRE2/APBB1IP/GABARAPL1/RIPOR2/PACSIN2/CTNNA1/NEDD9/DYSF/NDEL1/FLOT1/ATP7A	18
purple	GO:0032496	response to lipopolysaccharide	18/338	327/17653	6.38317e-05	0.0052009	0.00444631	PLCG2/MAPK1/FOS/TLR2/SLC11A1/ALPL/LYN/CEBPB/CD55/NLRP3/TLR5/CARD16/LITAF/JUNB/IRAK3/LILRB2/LILRA2/ZFP36	18
purple	GO:0030098	lymphocyte differentiation	18/338	330/17653	7.17525e-05	0.00565986	0.00483868	PLCG2/FCER1G/CLEC4D/ADGRG3/EP300/FUT7/PREX1/NLRP3/ADAM8/PKNOX1/BCL6/STAT3/IL18R1/FCGR2B/HLX/LILRB2/SEMA4A/ATP7A	18
purple	GO:0002294	CD4-positive, alpha-beta T cell differentiation involved in immune response	7/338	54/17653	7.24848e-05	0.00565986	0.00483868	NLRP3/BCL6/STAT3/IL18R1/HLX/SEMA4A/ATP7A	7
purple	GO:0002287	alpha-beta T cell activation involved in immune response	7/338	55/17653	8.17074e-05	0.00612478	0.00523615	NLRP3/BCL6/STAT3/IL18R1/HLX/SEMA4A/ATP7A	7
purple	GO:0002293	alpha-beta T cell differentiation involved in immune response	7/338	55/17653	8.17074e-05	0.00612478	0.00523615	NLRP3/BCL6/STAT3/IL18R1/HLX/SEMA4A/ATP7A	7
purple	GO:0042088	T-helper 1 type immune response	6/338	39/17653	9.02183e-05	0.00663016	0.0056682	IL18RAP/SLC11A1/TLR6/IL18R1/HLX/SEMA4A	6
purple	GO:0001774	microglial cell activation	5/338	25/17653	9.68406e-05	0.00697997	0.00596726	ITGAM/TLR2/TLR8/FPR2/TLR6	5
purple	GO:0046982	protein heterodimerization activity	25/335	500/17548	1.22864e-05	0.00762988	0.00716494	RAF1/SOS2/ITGAM/FOS/SDCBP/TLR2/CEBPB/GCA/RRAGD/BID/HIST2H2AA4/CTNNA1/PKNOX1/NECTIN2/ABCG1/HIST1H2BC/HIST1H2BK/TLR6/LIMK2/IRAK3/FLOT1/VAPA/BCL2A1/AOC3/HIST1H2BH	25
purple	GO:0005770	late endosome	13/354	240/18698	0.000690599	0.00810897	0.00677702	MAPK1/IGF2R/YIPF1/LAMP2/SLC11A1/CHMP3/ANKRD13A/DYSF/RNF13/LITAF/STX7/ATP7A/KIAA1324	13
purple	GO:0030217	T cell differentiation	14/338	225/17653	0.000116352	0.00822809	0.00703429	FCER1G/CLEC4D/FUT7/PREX1/NLRP3/ADAM8/PKNOX1/BCL6/STAT3/IL18R1/HLX/LILRB2/SEMA4A/ATP7A	14
purple	GO:0050707	regulation of cytokine secretion	12/338	172/17653	0.000122246	0.00848479	0.00725375	TLR2/LYN/TLR8/IL1R2/ORM1/NLRP3/TLR5/FFAR2/CARD16/TLR6/IL1RAP/FCGR2B	12
purple	GO:0072593	reactive oxygen species metabolic process	15/338	256/17653	0.000130731	0.00890874	0.00761619	ITGAM/PDK3/TLR2/PREX1/NCF2/CYP1B1/NCF1/TLR5/BST1/STAT3/FPR2/TLR6/CFLAR/SOD2/ATP7A	15
purple	GO:0071222	cellular response to lipopolysaccharide	12/338	174/17653	0.000136371	0.00912715	0.00780291	MAPK1/TLR2/LYN/CEBPB/CD55/NLRP3/TLR5/CARD16/LITAF/LILRB2/LILRA2/ZFP36	12
purple	GO:0002220	innate immune response activating cell surface receptor signaling pathway	10/338	126/17653	0.00015672	0.0101252	0.00865616	PLCG2/FCER1G/RAF1/ICAM3/CLEC4D/EP300/LYN/FFAR2/RPS6KA5/LILRA2	10
purple	GO:0043300	regulation of leukocyte degranulation	6/338	43/17653	0.000158077	0.0101252	0.00865616	FCER1G/ITGAM/LYN/ADGRE2/FCGR2B/GAB2	6
purple	GO:0006914	autophagy	22/338	482/17653	0.00016209	0.0101252	0.00865616	PSEN1/EP300/TRIM8/LAMP2/TRIM21/SH3GLB1/PLEKHM1/USP10/TBC1D14/CHMP3/ATP6V1B2/RRAGD/GABARAPL1/ULK1/CAMKK2/ATG16L2/DAPK2/UBXN2B/NRBF2/VMP1/RAB24/KIAA1324	22
purple	GO:0061919	process utilizing autophagic mechanism	22/338	482/17653	0.00016209	0.0101252	0.00865616	PSEN1/EP300/TRIM8/LAMP2/TRIM21/SH3GLB1/PLEKHM1/USP10/TBC1D14/CHMP3/ATP6V1B2/RRAGD/GABARAPL1/ULK1/CAMKK2/ATG16L2/DAPK2/UBXN2B/NRBF2/VMP1/RAB24/KIAA1324	22
purple	GO:0002429	immune response-activating cell surface receptor signaling pathway	21/338	450/17653	0.000168483	0.0103521	0.0088501	PLCG2/FCER1G/RAF1/PSEN1/FCGR3A/MAPK1/ICAM3/CLEC4D/PTPRJ/EP300/LYN/NECTIN2/MNDA/LCP2/FPR1/FFAR2/FPR2/RPS6KA5/FCGR2B/ARPC4/LILRA2	21
purple	GO:0002886	regulation of myeloid leukocyte mediated immunity	6/338	45/17653	0.000204518	0.0123635	0.0105697	FCER1G/ITGAM/LYN/ADGRE2/FCGR2B/GAB2	6
purple	GO:0030099	myeloid cell differentiation	19/338	394/17653	0.000226836	0.0134949	0.011537	HSPA1A/PSEN1/RASSF2/FOS/TLR2/EP300/LILRB3/AGO4/LYN/CEBPB/PKNOX1/TFE3/BCL6/STAT3/CSF3R/JUNB/ZFP36/GAB2/SNX10	19
purple	GO:0002224	toll-like receptor signaling pathway	10/338	135/17653	0.000275388	0.0161274	0.0137875	ITGAM/TLR2/LYN/TLR8/TLR5/LILRA4/TLR6/IRAK3/FLOT1/LILRA2	10
purple	GO:0032675	regulation of interleukin-6 production	9/338	111/17653	0.000283294	0.0163352	0.0139651	FCER1G/TLR2/TLR8/CEBPB/ORM1/TLR6/IL1RAP/IRAK3/LILRB2	9
purple	GO:0042982	amyloid precursor protein metabolic process	6/338	48/17653	0.000293646	0.0166755	0.0142561	PSEN1/FKBP1A/LYN/ABCG1/ITM2B/PICALM	6
purple	GO:0071496	cellular response to external stimulus	16/338	307/17653	0.000299983	0.0167811	0.0143464	MAPK1/FOS/LAMP2/SH3GLB1/LYN/TLR8/RRAGD/GABARAPL1/ULK1/MAP3K5/RIPOR2/TLR5/MAP3K2/TNFSF14/CBL/KIAA1324	16
purple	GO:0042987	amyloid precursor protein catabolic process	5/338	32/17653	0.000328866	0.0178869	0.0152918	PSEN1/FKBP1A/LYN/ABCG1/PICALM	5
purple	GO:0045806	negative regulation of endocytosis	6/338	49/17653	0.000329295	0.0178869	0.0152918	SDCBP/TLR2/PACSIN2/PICALM/FCGR2B/PTEN	6
purple	GO:0030316	osteoclast differentiation	8/338	91/17653	0.000355432	0.0187628	0.0160405	RASSF2/FOS/LILRB3/CEBPB/TFE3/JUNB/GAB2/SNX10	8
purple	GO:0046632	alpha-beta T cell differentiation	8/338	91/17653	0.000355432	0.0187628	0.0160405	FUT7/NLRP3/BCL6/STAT3/IL18R1/HLX/SEMA4A/ATP7A	8
purple	GO:0032637	interleukin-8 production	7/338	70/17653	0.00037781	0.0196519	0.0168007	HSPA1A/TLR2/TLR8/TLR5/FFAR2/TLR6/LILRA2	7
purple	GO:0002460	adaptive immune response based on somatic recombination of immune receptors built from immunoglobulin superfamily domains	16/338	314/17653	0.000384987	0.0196519	0.0168007	FCER1G/IL18RAP/SLC11A1/TLR8/CD55/NLRP3/NECTIN2/C1RL/BCL6/STAT3/TLR6/IL18R1/FCGR2B/HLX/STX7/SEMA4A	16
purple	GO:0061025	membrane fusion	14/338	253/17653	0.000390042	0.0196519	0.0168007	STX3/STX11/GCA/TBC1D14/CHMP3/VAMP3/VPS8/USP6/NECTIN2/UBXN2B/DYSF/STX7/VAPA/BCL2A1	14
purple	GO:0046631	alpha-beta T cell activation	9/338	116/17653	0.000393249	0.0196519	0.0168007	FUT7/CD55/NLRP3/BCL6/STAT3/IL18R1/HLX/SEMA4A/ATP7A	9
purple	GO:0002703	regulation of leukocyte mediated immunity	11/338	168/17653	0.000402249	0.0198018	0.0169288	FCER1G/ITGAM/IL18RAP/LYN/ADGRE2/NLRP3/NECTIN2/BCL6/FCGR2B/STX7/GAB2	11
purple	GO:0050701	interleukin-1 secretion	6/338	51/17653	0.000410711	0.0198018	0.0169288	TLR8/IL1R2/ORM1/NLRP3/CARD16/TLR6	6
purple	GO:0000045	autophagosome assembly	8/338	93/17653	0.000412096	0.0198018	0.0169288	PSEN1/SH3GLB1/TBC1D14/GABARAPL1/ULK1/ATG16L2/UBXN2B/KIAA1324	8
purple	GO:0007249	I-kappaB kinase/NF-kappaB signaling	14/338	256/17653	0.000438959	0.020633	0.0176394	TLR2/FKBP1A/TRIM8/TLR8/USP10/NLRP3/CANT1/CARD16/S100A12/LITAF/TLR6/CFLAR/PELI2/VAPA	14
purple	GO:0043171	peptide catabolic process	5/338	34/17653	0.000440405	0.020633	0.0176394	CPQ/ECE1/NPEPPS/ANPEP/NRDC	5
purple	GO:0004896	cytokine receptor activity	9/335	93/17548	7.11705e-05	0.0220984	0.0207518	CXCR1/IL1R2/IFNGR2/IL13RA1/CXCR2/CSF3R/IL18R1/CSF2RA/IL1RAP	9
purple	GO:0032103	positive regulation of response to external stimulus	15/338	289/17653	0.000480393	0.0222285	0.0190034	FCER1G/TLR2/STX3/CCL3L3/RIPOR2/ADAM8/CXCR2/FFAR2/DAPK2/S100A12/FPR2/TNFSF14/TLR6/OSM/NDEL1	15
purple	GO:0043112	receptor metabolic process	11/338	172/17653	0.000490959	0.0224404	0.0191846	PLCG2/FCER1G/PSEN1/CXCR1/SDCBP/SH3GLB1/VAMP3/CXCR2/ECE1/PICALM/FLOT1	11
purple	GO:1901739	regulation of myoblast fusion	4/338	20/17653	0.000501853	0.022662	0.019374	RIPOR2/TNFSF14/CFLAR/FLOT1	4
purple	GO:1905037	autophagosome organization	8/338	96/17653	0.000510667	0.0227855	0.0194796	PSEN1/SH3GLB1/TBC1D14/GABARAPL1/ULK1/ATG16L2/UBXN2B/KIAA1324	8
purple	GO:0031663	lipopolysaccharide-mediated signaling pathway	6/338	54/17653	0.000561362	0.0246302	0.0210566	MAPK1/TLR2/LYN/CD55/CARD16/LILRA2	6
purple	GO:0002699	positive regulation of immune effector process	11/338	175/17653	0.000567753	0.0246302	0.0210566	FCER1G/ITGAM/IL18RAP/LYN/ADGRE2/NLRP3/NECTIN2/FFAR2/HLX/STX7/GAB2	11
purple	GO:0002755	MyD88-dependent toll-like receptor signaling pathway	5/338	36/17653	0.000578296	0.0246302	0.0210566	TLR2/TLR8/TLR5/TLR6/IRAK3	5
purple	GO:0034122	negative regulation of toll-like receptor signaling pathway	5/338	36/17653	0.000578296	0.0246302	0.0210566	LYN/LILRA4/TLR6/IRAK3/LILRA2	5
purple	GO:0043202	lysosomal lumen	7/354	95/18698	0.00218288	0.0248302	0.0207517	GALNS/VCAN/NEU1/HPSE/MANBA/LAMP2/NAAA	7
purple	GO:0051051	negative regulation of transport	20/338	460/17653	0.000592485	0.0249509	0.0213308	OAZ2/HSPA1A/SDCBP/TLR2/TLR8/IL1R2/VAMP3/MAP4K4/NLRP3/PACSIN2/CARD16/TLR6/OSM/PICALM/FCGR2B/LILRB2/PIM3/PTEN/ATP7A/KCNE3	20
purple	GO:0044853	plasma membrane raft	7/354	98/18698	0.00260478	0.0287315	0.0240122	ITGAM/MAPK1/PACSIN2/CTNNA1/LCP2/CBL/FLOT1	7
purple	GO:1902622	regulation of neutrophil migration	5/338	38/17653	0.000746267	0.0304465	0.0260291	RIPOR2/ADAM8/CXCR2/BST1/DAPK2	5
purple	GO:0046855	inositol phosphate dephosphorylation	3/338	10/17653	0.000755475	0.0304465	0.0260291	IMPA2/INPP5A/PTEN	3
purple	GO:0072672	neutrophil extravasation	3/338	10/17653	0.000755475	0.0304465	0.0260291	PECAM1/RIPOR2/ADAM8	3
purple	GO:2001198	regulation of dendritic cell differentiation	3/338	10/17653	0.000755475	0.0304465	0.0260291	FCGR2B/TMEM176B/LILRB2	3
purple	GO:0008305	integrin complex	4/354	32/18698	0.0029882	0.0315392	0.0263587	ITGAM/LYN/BST1/ITGAX	4
purple	GO:0044440	endosomal part	19/354	496/18698	0.00303262	0.0315392	0.0263587	YIPF1/LAMP2/SLC11A1/PLEKHM1/TLR8/STEAP4/CHMP3/VAMP3/VPS8/RRAGD/PACSIN2/ECE1/ITM2B/RNF13/LITAF/SORT1/STX7/SNX10/KIAA1324	19
purple	GO:0033003	regulation of mast cell activation	5/338	39/17653	0.000842745	0.0336022	0.0287269	FCER1G/LYN/ADGRE2/NECTIN2/GAB2	5
purple	GO:0006968	cellular defense response	6/338	59/17653	0.00090407	0.0352286	0.0301173	CD300C/NCF2/CXCR2/NCF1/MNDA/LILRB2	6
purple	GO:0050710	negative regulation of cytokine secretion	6/338	59/17653	0.00090407	0.0352286	0.0301173	TLR8/IL1R2/NLRP3/CARD16/TLR6/FCGR2B	6
purple	GO:0002456	T cell mediated immunity	7/338	81/17653	0.000916288	0.0352286	0.0301173	IL18RAP/SLC11A1/CD55/NLRP3/NECTIN2/FCGR2B/STX7	7
purple	GO:0001818	negative regulation of cytokine production	13/338	245/17653	0.000921131	0.0352286	0.0301173	SLC11A1/TLR8/IL1R2/ORM1/NLRP3/BCL6/CARD16/LILRA4/TLR6/RPS6KA5/FCGR2B/IRAK3/ZFP36	13
purple	GO:0031099	regeneration	11/338	186/17653	0.00094036	0.0355392	0.0303829	ANXA3/IGF2R/CPQ/IFRD1/CEBPB/ULK1/MAP4K4/CTNNA1/CFLAR/NDEL1/PTEN	11
purple	GO:0097028	dendritic cell differentiation	5/338	40/17653	0.000948217	0.0355392	0.0303829	PSEN1/LYN/FCGR2B/TMEM176B/LILRB2	5
purple	GO:0005925	focal adhesion	16/354	393/18698	0.00352424	0.035634	0.0297808	HSPA1A/ZNF185/MAPK1/IGF2R/SDCBP/NUMB/PLAUR/APBB1IP/MME/PACSIN2/CTNNA1/NECTIN2/MPZL1/NEDD9/CBL/FLOT1	16
purple	GO:0045628	regulation of T-helper 2 cell differentiation	3/338	11/17653	0.00102409	0.0369065	0.0315518	NLRP3/BCL6/HLX	3
purple	GO:0046838	phosphorylated carbohydrate dephosphorylation	3/338	11/17653	0.00102409	0.0369065	0.0315518	IMPA2/INPP5A/PTEN	3
purple	GO:0070673	response to interleukin-18	3/338	11/17653	0.00102409	0.0369065	0.0315518	ALOX5/IL18RAP/IL18R1	3
purple	GO:2000786	positive regulation of autophagosome assembly	3/338	11/17653	0.00102409	0.0369065	0.0315518	SH3GLB1/ULK1/KIAA1324	3
purple	GO:0005924	cell-substrate adherens junction	16/354	396/18698	0.00379234	0.0373084	0.0311803	HSPA1A/ZNF185/MAPK1/IGF2R/SDCBP/NUMB/PLAUR/APBB1IP/MME/PACSIN2/CTNNA1/NECTIN2/MPZL1/NEDD9/CBL/FLOT1	16
purple	GO:0098636	protein complex involved in cell adhesion	4/354	35/18698	0.00416183	0.0398659	0.0333177	ITGAM/LYN/BST1/ITGAX	4
purple	GO:0030055	cell-substrate junction	16/354	401/18698	0.00427634	0.0399126	0.0333566	HSPA1A/ZNF185/MAPK1/IGF2R/SDCBP/NUMB/PLAUR/APBB1IP/MME/PACSIN2/CTNNA1/NECTIN2/MPZL1/NEDD9/CBL/FLOT1	16
purple	GO:2000106	regulation of leukocyte apoptotic process	7/338	84/17653	0.00113679	0.0402618	0.0344203	FCER1G/HCAR2/LYN/ADAM8/CXCR2/BCL6/PTEN	7
purple	GO:1903706	regulation of hemopoiesis	19/338	450/17653	0.00113968	0.0402618	0.0344203	HSPA1A/RASSF2/FOS/EP300/LILRB3/AGO4/LYN/CEBPB/NLRP3/ADAM8/TFE3/BCL6/STAT3/CSF3R/FCGR2B/HLX/TMEM176B/LILRB2/ZFP36	19
purple	GO:0034614	cellular response to reactive oxygen species	10/338	162/17653	0.00114942	0.0402618	0.0344203	MAPK1/FOS/IL18RAP/CAMKK2/CYP1B1/MAP3K5/NCF1/CFLAR/SOD2/ATP7A	10
purple	GO:0002573	myeloid leukocyte differentiation	11/338	191/17653	0.00116672	0.0404895	0.0346149	PSEN1/RASSF2/FOS/TLR2/LILRB3/LYN/CEBPB/TFE3/JUNB/GAB2/SNX10	11
purple	GO:0035336	long-chain fatty-acyl-CoA metabolic process	4/338	25/17653	0.00121511	0.041402	0.0353951	ACSL1/FAR2/ELOVL5/DGAT2	4
purple	GO:1904646	cellular response to amyloid-beta	4/338	25/17653	0.00121511	0.041402	0.0353951	PSEN1/FPR2/TLR6/FCGR2B	4
purple	GO:0043122	regulation of I-kappaB kinase/NF-kappaB signaling	12/338	223/17653	0.00127264	0.0424199	0.0362653	FKBP1A/TRIM8/USP10/NLRP3/CANT1/CARD16/S100A12/LITAF/TLR6/CFLAR/PELI2/VAPA	12
purple	GO:0032677	regulation of interleukin-8 production	6/338	63/17653	0.00127896	0.0424199	0.0362653	HSPA1A/TLR2/TLR8/TLR5/FFAR2/TLR6	6
purple	GO:0060627	regulation of vesicle-mediated transport	20/338	490/17653	0.00128161	0.0424199	0.0362653	PLCG2/FCER1G/ITGAM/MAPK1/SDCBP/TLR2/SLC11A1/LYN/TBC1D14/CHMP3/ADGRE2/USP6/SIRPA/PACSIN2/PICALM/FCGR2B/CBL/FLOT1/PTEN/GAB2	20
purple	GO:0034599	cellular response to oxidative stress	14/338	286/17653	0.00129025	0.0424199	0.0362653	HSPA1A/MAPK1/FOS/IL18RAP/NCF2/CAMKK2/CYP1B1/MAP3K5/NCF1/ALDH3B1/TLR6/CFLAR/SOD2/ATP7A	14
purple	GO:0002688	regulation of leukocyte chemotaxis	8/338	111/17653	0.00132849	0.0427576	0.036554	LYN/RIPOR2/CXCR2/BST1/DAPK2/FPR2/TNFSF14/PADI2	8
purple	GO:0044090	positive regulation of vacuole organization	3/338	12/17653	0.00134616	0.0427576	0.036554	SH3GLB1/ULK1/KIAA1324	3
purple	GO:0071545	inositol phosphate catabolic process	3/338	12/17653	0.00134616	0.0427576	0.036554	IMPA2/INPP5A/PTEN	3
purple	GO:0097284	hepatocyte apoptotic process	3/338	12/17653	0.00134616	0.0427576	0.036554	BID/DNMT3A/CFLAR	3
purple	GO:1902105	regulation of leukocyte differentiation	13/338	256/17653	0.00137182	0.0432067	0.0369379	RASSF2/FOS/LILRB3/LYN/CEBPB/NLRP3/ADAM8/TFE3/BCL6/FCGR2B/HLX/TMEM176B/LILRB2	13
purple	GO:0005769	early endosome	14/354	334/18698	0.00478661	0.0435582	0.0364034	MAPK1/IGF2R/NUMB/STEAP4/USP10/VPS8/PACSIN2/DYSF/LITAF/PICALM/SORT1/STX7/FLOT1/AOC3	14
purple	GO:0060142	regulation of syncytium formation by plasma membrane fusion	4/338	26/17653	0.00141458	0.0441819	0.0377717	RIPOR2/TNFSF14/CFLAR/FLOT1	4
purple	GO:0002262	myeloid cell homeostasis	9/338	139/17653	0.0014423	0.0444013	0.0379592	FCER1G/HSPA1A/HCAR2/LYN/CXCR2/PKNOX1/BCL6/STAT3/ZFP36	9
purple	GO:0043123	positive regulation of I-kappaB kinase/NF-kappaB signaling	10/338	167/17653	0.00144529	0.0444013	0.0379592	FKBP1A/TRIM8/CANT1/CARD16/S100A12/LITAF/TLR6/CFLAR/PELI2/VAPA	10
purple	GO:0050702	interleukin-1 beta secretion	5/338	44/17653	0.00147034	0.0444423	0.0379943	TLR8/ORM1/NLRP3/CARD16/TLR6	5
purple	GO:0050704	regulation of interleukin-1 secretion	5/338	44/17653	0.00147034	0.0444423	0.0379943	TLR8/IL1R2/ORM1/NLRP3/CARD16	5
purple	GO:0030100	regulation of endocytosis	12/338	229/17653	0.00159414	0.0475267	0.0406311	PLCG2/FCER1G/SDCBP/TLR2/SLC11A1/SIRPA/PACSIN2/PICALM/FCGR2B/CBL/FLOT1/PTEN	12
purple	GO:0002279	mast cell activation involved in immune response	5/338	45/17653	0.00162857	0.0475267	0.0406311	FCER1G/LYN/ADGRE2/CBL/GAB2	5
purple	GO:0032757	positive regulation of interleukin-8 production	5/338	45/17653	0.00162857	0.0475267	0.0406311	HSPA1A/TLR2/TLR8/TLR5/FFAR2	5
purple	GO:0043303	mast cell degranulation	5/338	45/17653	0.00162857	0.0475267	0.0406311	FCER1G/LYN/ADGRE2/CBL/GAB2	5
purple	GO:1904645	response to amyloid-beta	4/338	27/17653	0.00163579	0.0475267	0.0406311	PSEN1/FPR2/TLR6/FCGR2B	4
purple	GO:0034134	toll-like receptor 2 signaling pathway	3/338	13/17653	0.0017253	0.0493621	0.0422002	TLR2/LYN/TLR6	3
purple	GO:0036109	alpha-linolenic acid metabolic process	3/338	13/17653	0.0017253	0.0493621	0.0422002	ACSL1/ACAA1/ELOVL5	3

## Sheet: turquoise
Cluster	ID	Description	GeneRatio	BgRatio	pvalue	p.adjust	qvalue	geneID	Count
turquoise	GO:0000781	chromosome, telomeric region	18/559	159/18698	1.34991e-06	0.000751899	0.00068348	THOC2/HIST1H4H/CTC1/RECQL4/ACD/HIST1H4J/HIST1H4D/HIST1H4F/HIST1H4K/XRCC3/LRWD1/ALYREF/CBX5/HIST2H4B/HIST1H4I/H2AFX/TEN1/POLD1	18
turquoise	GO:0045652	regulation of megakaryocyte differentiation	13/532	76/17653	3.93003e-07	0.000822998	0.000788464	HIST1H4H/HIST1H4J/AGO1/HIST1H4D/KMT2D/HIST1H4F/HIST1H4K/TNRC6C/HIST2H3A/SETD1A/SIN3A/HIST2H4B/HIST1H4I	13
turquoise	GO:0045653	negative regulation of megakaryocyte differentiation	7/532	18/17653	5.17536e-07	0.000822998	0.000788464	HIST1H4H/HIST1H4J/HIST1H4D/HIST1H4F/HIST1H4K/HIST2H4B/HIST1H4I	7
turquoise	GO:0016233	telomere capping	11/532	55/17653	6.04553e-07	0.000822998	0.000788464	HIST1H4H/CTC1/ACD/HIST1H4J/HIST1H4D/HIST1H4F/HIST1H4K/HIST2H4B/HIST1H4I/PNKP/TEN1	11
turquoise	GO:0000790	nuclear chromatin	28/559	354/18698	3.09681e-06	0.000831904	0.000756205	CHAF1A/HIST1H4H/DFFA/CDK9/UBE2A/HIST1H4J/HIST1H4D/SMARCA2/GATA3/ARID1B/CALCOCO1/ZNHIT1/HIST1H2AM/HIST1H4F/HIST1H4K/TCP1/NR1H3/PLCB1/ASXL1/SETD1A/SIN3A/CBX5/HIST2H4B/SMARCB1/HIST1H4I/HIST1H2AE/H2AFX/MEF2B	28
turquoise	GO:0000784	nuclear chromosome, telomeric region	15/559	124/18698	4.48063e-06	0.000831904	0.000756205	THOC2/HIST1H4H/CTC1/ACD/HIST1H4J/HIST1H4D/HIST1H4F/HIST1H4K/XRCC3/ALYREF/CBX5/HIST2H4B/HIST1H4I/TEN1/POLD1	15
turquoise	GO:0042393	histone binding	20/539	194/17548	2.34053e-06	0.00163837	0.00161866	HIST1H4H/BRD3/HIST1H4J/HIST1H4D/SMARCA2/PIH1D1/TBL1X/ZMYND11/BRD4/PHF8/HIST1H4F/HIST1H4K/LRWD1/KDM4A/CBX5/HIST2H4B/ING5/NPM3/HIST1H4I/H2AFX	20
turquoise	GO:0000183	chromatin silencing at rDNA	9/532	39/17653	1.81246e-06	0.00185052	0.00177287	HIST1H4H/HIST1H4J/HIST1H4D/PHF8/HIST1H4F/HIST1H4K/HIST2H3A/HIST2H4B/HIST1H4I	9
turquoise	GO:0006335	DNA replication-dependent nucleosome assembly	8/532	32/17653	3.58552e-06	0.0019659	0.00188341	CHAF1A/HIST1H4H/HIST1H4J/HIST1H4D/HIST1H4F/HIST1H4K/HIST2H4B/HIST1H4I	8
turquoise	GO:0034723	DNA replication-dependent nucleosome organization	8/532	32/17653	3.58552e-06	0.0019659	0.00188341	CHAF1A/HIST1H4H/HIST1H4J/HIST1H4D/HIST1H4F/HIST1H4K/HIST2H4B/HIST1H4I	8
turquoise	GO:0030219	megakaryocyte differentiation	13/532	93/17653	4.18647e-06	0.0019659	0.00188341	HIST1H4H/HIST1H4J/AGO1/HIST1H4D/KMT2D/HIST1H4F/HIST1H4K/TNRC6C/HIST2H3A/SETD1A/SIN3A/HIST2H4B/HIST1H4I	13
turquoise	GO:0034080	CENP-A containing nucleosome assembly	9/532	43/17653	4.3323e-06	0.0019659	0.00188341	HIST1H4H/MIS18A/CENPP/HIST1H4J/HIST1H4D/HIST1H4F/HIST1H4K/HIST2H4B/HIST1H4I	9
turquoise	GO:0061641	CENP-A containing chromatin organization	9/532	43/17653	4.3323e-06	0.0019659	0.00188341	HIST1H4H/MIS18A/CENPP/HIST1H4J/HIST1H4D/HIST1H4F/HIST1H4K/HIST2H4B/HIST1H4I	9
turquoise	GO:0000723	telomere maintenance	17/532	159/17653	6.37662e-06	0.00233492	0.00223694	HIST1H4H/CTC1/RECQL4/ACD/HIST1H4J/HIST1H4D/HIST1H4F/HIST1H4K/GNL3L/TCP1/XRCC3/CCNE1/HIST2H4B/HIST1H4I/PNKP/TEN1/POLD1	17
turquoise	GO:0031055	chromatin remodeling at centromere	9/532	45/17653	6.45252e-06	0.00233492	0.00223694	HIST1H4H/MIS18A/CENPP/HIST1H4J/HIST1H4D/HIST1H4F/HIST1H4K/HIST2H4B/HIST1H4I	9
turquoise	GO:0043486	histone exchange	10/532	57/17653	6.86068e-06	0.00233492	0.00223694	HIST1H4H/MIS18A/CENPP/HIST1H4J/HIST1H4D/ZNHIT1/HIST1H4F/HIST1H4K/HIST2H4B/HIST1H4I	10
turquoise	GO:0032993	protein-DNA complex	18/559	198/18698	2.92319e-05	0.00407054	0.00370014	HIST1H4H/ATF6B/NFYC/CTC1/ACD/HIST1H4J/HIST1H4D/HIST1H2AM/HIST1H4F/HIST1H4K/KAT6A/HIST2H3A/HIST2H4B/HIST1H4I/HIST1H2AE/H2AFX/TEN1/POLD1	18
turquoise	GO:0006338	chromatin remodeling	18/532	188/17653	1.60105e-05	0.00446977	0.00428221	HIST1H4H/MIS18A/CENPP/RIOX1/TOX2/HIST1H4J/HIST1H4D/SMARCA2/GATA3/PIH1D1/ARID1B/ZNHIT1/HIST1H4F/HIST1H4K/HIST2H4B/SMARCB1/NPM3/HIST1H4I	18
turquoise	GO:0032200	telomere organization	17/532	172/17653	1.81291e-05	0.00446977	0.00428221	HIST1H4H/CTC1/RECQL4/ACD/HIST1H4J/HIST1H4D/HIST1H4F/HIST1H4K/GNL3L/TCP1/XRCC3/CCNE1/HIST2H4B/HIST1H4I/PNKP/TEN1/POLD1	17
turquoise	GO:0045814	negative regulation of gene expression, epigenetic	15/532	138/17653	1.81894e-05	0.00446977	0.00428221	HIST1H4H/JARID2/HIST1H4J/HIST1H4D/KMT2D/HIST1H2AM/PHF8/HIST1H4F/HIST1H4K/HIST2H3A/SIN3A/HIST2H4B/HIST1H4I/HIST1H2AE/H2AFX	15
turquoise	GO:0006352	DNA-templated transcription, initiation	21/532	246/17653	1.8903e-05	0.00446977	0.00428221	NOTCH4/HIST1H4H/BAX/CDK9/PSMC1/HIST1H4J/HIST1H4D/TAF6/PIH1D1/CDK7/HIST1H4F/HIST1H4K/MED8/NR1H3/POLR2F/HIST2H4B/SMARCB1/TAF15/RORC/HIST1H4I/MAML3	21
turquoise	GO:0006342	chromatin silencing	14/532	123/17653	2.04164e-05	0.00446977	0.00428221	HIST1H4H/HIST1H4J/HIST1H4D/KMT2D/HIST1H2AM/PHF8/HIST1H4F/HIST1H4K/HIST2H3A/SIN3A/HIST2H4B/HIST1H4I/HIST1H2AE/H2AFX	14
turquoise	GO:2001251	negative regulation of chromosome organization	14/532	123/17653	2.04164e-05	0.00446977	0.00428221	SKI/PTTG1/CTBP1/CTC1/ACD/JARID2/PIH1D1/PHF8/GNL3L/XRCC3/KDM4A/SIN3A/SMARCB1/TEN1	14
turquoise	GO:0043044	ATP-dependent chromatin remodeling	11/532	79/17653	2.37761e-05	0.00446977	0.00428221	HIST1H4H/MIS18A/CENPP/HIST1H4J/HIST1H4D/ZNHIT1/HIST1H4F/HIST1H4K/HIST2H4B/SMARCB1/HIST1H4I	11
turquoise	GO:0045815	positive regulation of gene expression, epigenetic	11/532	79/17653	2.37761e-05	0.00446977	0.00428221	HIST1H4H/HIST1H4J/HIST1H4D/ARID1B/PHF8/HIST1H4F/HIST1H4K/HIST2H3A/POLR2F/HIST2H4B/HIST1H4I	11
turquoise	GO:0060249	anatomical structure homeostasis	28/532	393/17653	2.47814e-05	0.00446977	0.00428221	HIST1H4H/BAX/GAA/PLEKHM1/CTC1/HAAO/RECQL4/ACD/HIST1H4J/HIST1H4D/ZG16B/CIB2/BGLAP/DEF8/STK11/ACP5/HIST1H4F/HIST1H4K/GNL3L/TCP1/XRCC3/CCNE1/GIGYF2/HIST2H4B/HIST1H4I/PNKP/TEN1/POLD1	28
turquoise	GO:0006336	DNA replication-independent nucleosome assembly	9/532	53/17653	2.60478e-05	0.00446977	0.00428221	HIST1H4H/MIS18A/CENPP/HIST1H4J/HIST1H4D/HIST1H4F/HIST1H4K/HIST2H4B/HIST1H4I	9
turquoise	GO:0034508	centromere complex assembly	9/532	53/17653	2.60478e-05	0.00446977	0.00428221	HIST1H4H/MIS18A/CENPP/HIST1H4J/HIST1H4D/HIST1H4F/HIST1H4K/HIST2H4B/HIST1H4I	9
turquoise	GO:0033044	regulation of chromosome organization	24/532	311/17653	2.6267e-05	0.00446977	0.00428221	SKI/PTTG1/CTBP1/CDK9/CTC1/ACD/JARID2/C6orf89/GATA3/PIH1D1/ZNHIT1/NEK6/PHF8/GNL3L/TCP1/XRCC3/WDR70/KDM4A/SETD1A/SIN3A/SMARCB1/TLK2/PNKP/TEN1	24
turquoise	GO:0034724	DNA replication-independent nucleosome organization	9/532	54/17653	3.04328e-05	0.00497151	0.0047629	HIST1H4H/MIS18A/CENPP/HIST1H4J/HIST1H4D/HIST1H4F/HIST1H4K/HIST2H4B/HIST1H4I	9
turquoise	GO:0098687	chromosomal region	25/559	347/18698	4.96968e-05	0.00553623	0.00503246	THOC2/HIST1H4H/MIS18A/CENPP/PSEN2/CTC1/RECQL4/ACD/HIST1H4J/HIST1H4D/PMF1/SMC1A/HIST1H4F/HIST1H4K/XRCC3/LRWD1/KDM4A/ALYREF/SIN3A/CBX5/HIST2H4B/HIST1H4I/H2AFX/TEN1/POLD1	25
turquoise	GO:0000786	nucleosome	12/559	105/18698	7.05211e-05	0.00654671	0.00595099	HIST1H4H/HIST1H4J/HIST1H4D/HIST1H2AM/HIST1H4F/HIST1H4K/KAT6A/HIST2H3A/HIST2H4B/HIST1H4I/HIST1H2AE/H2AFX	12
turquoise	GO:1904837	beta-catenin-TCF complex assembly	8/532	44/17653	4.39572e-05	0.00690466	0.00661494	HIST1H4H/HIST1H4J/HIST1H4D/KMT2D/HIST1H4F/HIST1H4K/HIST2H4B/HIST1H4I	8
turquoise	GO:0002244	hematopoietic progenitor cell differentiation	17/532	186/17653	4.95782e-05	0.00749916	0.00718448	HIST1H4H/KCNAB2/PSMC1/HIST1H4J/HIST1H4D/GATA3/REST/HYAL2/HIST1H4F/HIST1H4K/HIST2H3A/SETD1A/SIN3A/HIST2H4B/HIST1H4I/ZFAT/ZNF784	17
turquoise	GO:1905268	negative regulation of chromatin organization	8/532	47/17653	7.20458e-05	0.0105084	0.0100675	SKI/CTBP1/JARID2/PIH1D1/PHF8/KDM4A/SIN3A/SMARCB1	8
turquoise	GO:0044815	DNA packaging complex	12/559	112/18698	0.000132119	0.0105129	0.00955628	HIST1H4H/HIST1H4J/HIST1H4D/HIST1H2AM/HIST1H4F/HIST1H4K/KAT6A/HIST2H3A/HIST2H4B/HIST1H4I/HIST1H2AE/H2AFX	12
turquoise	GO:0000788	nuclear nucleosome	7/559	40/18698	0.000162607	0.0113215	0.0102913	HIST1H4H/HIST1H4J/HIST1H4D/HIST1H4F/HIST1H4K/HIST2H4B/HIST1H4I	7
turquoise	GO:0065004	protein-DNA complex assembly	20/532	252/17653	8.28612e-05	0.0116691	0.0111795	CHAF1A/HIST1H4H/MIS18A/CENPP/PSMC1/HIST1H4J/HIST1H4D/TAF6/PIH1D1/CDK7/HIST1H4F/HIST1H4K/KAT6A/XRCC3/HIST2H3A/HIST2H4B/SMARCB1/PIAS1/HIST1H4I/H2AFX	20
turquoise	GO:2000736	regulation of stem cell differentiation	14/532	141/17653	9.32864e-05	0.0126994	0.0121665	HIST1H4H/PSMC1/HIST1H4J/HIST1H4D/GATA3/REST/HIST1H4F/HIST1H4K/HIST2H3A/SETD1A/HIST2H4B/HIST1H4I/LBH/CDK13	14
turquoise	GO:0016607	nuclear speck	25/559	381/18698	0.000216943	0.0134264	0.0122046	ACIN1/THOC2/SRRM2/PSKH1/PPP1R8/SART1/TIMM50/EIF4ENIF1/CRY2/SMU1/NEK6/KAT6A/PLCB1/SPRTN/ALYREF/SETD1A/LIMK1/AP5Z1/PIAS1/MAML3/HSPA1B/H2AFX/CACTIN/CWC15/CDK13	25
turquoise	GO:0031057	negative regulation of histone modification	7/532	38/17653	0.000121626	0.0160233	0.0153509	SKI/CTBP1/JARID2/PIH1D1/KDM4A/SIN3A/SMARCB1	7
turquoise	GO:1902275	regulation of chromatin organization	15/532	163/17653	0.000125806	0.016056	0.0153823	SKI/CTBP1/CDK9/JARID2/C6orf89/GATA3/PIH1D1/ZNHIT1/PHF8/WDR70/KDM4A/SETD1A/SIN3A/SMARCB1/TLK2	15
turquoise	GO:0071824	protein-DNA complex subunit organization	21/532	283/17653	0.000143859	0.0178036	0.0170565	CHAF1A/HIST1H4H/MIS18A/CENPP/PSMC1/HIST1H4J/HIST1H4D/TAF6/PIH1D1/CDK7/ZNHIT1/HIST1H4F/HIST1H4K/KAT6A/XRCC3/HIST2H3A/HIST2H4B/SMARCB1/PIAS1/HIST1H4I/H2AFX	21
turquoise	GO:0045637	regulation of myeloid cell differentiation	19/532	244/17653	0.000158834	0.0190787	0.0182782	ACIN1/HIST1H4H/FOXP1/SENP1/HIST1H4J/AGO1/TNF/HIST1H4D/KMT2D/BGLAP/HIST1H4F/HIST1H4K/TNRC6C/HIST2H3A/SETD1A/SIN3A/HIST2H4B/HIST1H4I/HSPA1B	19
turquoise	GO:0060968	regulation of gene silencing	13/532	133/17653	0.000192739	0.0224899	0.0215462	HIST1H4H/HIST1H4J/AGO1/HIST1H4D/PHF8/HIST1H4F/HIST1H4K/RAE1/HIST2H3A/SIN3A/POLR2F/HIST2H4B/HIST1H4I	13
turquoise	GO:0016575	histone deacetylation	10/532	85/17653	0.00023399	0.0263538	0.0252479	TBL1Y/SKI/CTBP1/C6orf89/MIER2/TBL1X/REST/ZNHIT1/SIN3A/SIRT3	10
turquoise	GO:0043161	proteasome-mediated ubiquitin-dependent protein catabolic process	26/532	403/17653	0.000238758	0.0263538	0.0252479	PTTG1/SPSB1/ARIH1/RNF216/SENP1/HSPA5/RMND5A/PSMC1/SPSB3/UBE2S/HSPBP1/UBE2A/GSK3A/DDA1/AGAP3/UBE4B/SIAH1/TBL1X/FBXO2/GID4/FZR1/RNF122/PIAS1/HSPA1B/TLK2/FBXL18	26
turquoise	GO:1902036	regulation of hematopoietic stem cell differentiation	11/532	103/17653	0.000274137	0.0294625	0.0282262	HIST1H4H/PSMC1/HIST1H4J/HIST1H4D/GATA3/HIST1H4F/HIST1H4K/HIST2H3A/SETD1A/HIST2H4B/HIST1H4I	11
turquoise	GO:0034728	nucleosome organization	15/532	176/17653	0.000292702	0.0306511	0.029365	CHAF1A/HIST1H4H/MIS18A/CENPP/HIST1H4J/HIST1H4D/ZNHIT1/HIST1H4F/HIST1H4K/KAT6A/HIST2H3A/HIST2H4B/SMARCB1/HIST1H4I/H2AFX	15
turquoise	GO:0043496	regulation of protein homodimerization activity	5/532	21/17653	0.000332577	0.0331626	0.031771	TRAF4/BAX/HSPA5/SPAG9/GNL3L	5
turquoise	GO:0005984	disaccharide metabolic process	4/532	12/17653	0.000332925	0.0331626	0.031771	GAA/IDUA/FBP1/B4GALT1	4
turquoise	GO:0030117	membrane coat	10/559	98/18698	0.000697185	0.0352979	0.0320859	AP1G1/AP3S2/SCYL1/GGA2/EPS15L1/SAR1A/COPZ1/AP5Z1/AP2S1/SYNRG	10
turquoise	GO:0048475	coated membrane	10/559	98/18698	0.000697185	0.0352979	0.0320859	AP1G1/AP3S2/SCYL1/GGA2/EPS15L1/SAR1A/COPZ1/AP5Z1/AP2S1/SYNRG	10
turquoise	GO:0005798	Golgi-associated vesicle	14/559	174/18698	0.000760457	0.0352979	0.0320859	VTI1A/MCFD2/AP1G1/SPPL3/RAB8A/SCYL1/VMA21/APP/CTSZ/SAR1A/BACE1/COPZ1/STK16/SYNRG	14
turquoise	GO:0051291	protein heterooligomerization	12/532	124/17653	0.000369183	0.0358986	0.0343923	HIST1H4H/HIST1H4J/HIST1H4D/SEPTIN11/HIST1H4F/HIST1H4K/C1QTNF6/GNB1/WIZ/HIST2H4B/SEPTIN9/HIST1H4I	12
turquoise	GO:0060964	regulation of gene silencing by miRNA	11/532	107/17653	0.000382318	0.0363113	0.0347877	HIST1H4H/HIST1H4J/AGO1/HIST1H4D/HIST1H4F/HIST1H4K/RAE1/HIST2H3A/POLR2F/HIST2H4B/HIST1H4I	11
turquoise	GO:0035601	protein deacylation	11/532	108/17653	0.000414354	0.0384596	0.0368458	TBL1Y/SKI/CTBP1/C6orf89/MIER2/TBL1X/REST/ZNHIT1/SIN3A/SIRT3/LYPLA2	11
turquoise	GO:0098732	macromolecule deacylation	11/532	109/17653	0.00044861	0.0407139	0.0390055	TBL1Y/SKI/CTBP1/C6orf89/MIER2/TBL1X/REST/ZNHIT1/SIN3A/SIRT3/LYPLA2	11
turquoise	GO:0006334	nucleosome assembly	13/532	146/17653	0.000480631	0.0426716	0.0408811	CHAF1A/HIST1H4H/MIS18A/CENPP/HIST1H4J/HIST1H4D/HIST1H4F/HIST1H4K/KAT6A/HIST2H3A/HIST2H4B/HIST1H4I/H2AFX	13
turquoise	GO:0006303	double-strand break repair via nonhomologous end joining	9/532	77/17653	0.000500282	0.0434713	0.0416472	HIST1H4H/HIST1H4J/HIST1H4D/HIST1H4F/HIST1H4K/HIST2H4B/MDC1/HIST1H4I/H2AFX	9
turquoise	GO:0060147	regulation of posttranscriptional gene silencing	11/532	111/17653	0.000524267	0.0436961	0.0418626	HIST1H4H/HIST1H4J/AGO1/HIST1H4D/HIST1H4F/HIST1H4K/RAE1/HIST2H3A/POLR2F/HIST2H4B/HIST1H4I	11
turquoise	GO:0060966	regulation of gene silencing by RNA	11/532	111/17653	0.000524267	0.0436961	0.0418626	HIST1H4H/HIST1H4J/AGO1/HIST1H4D/HIST1H4F/HIST1H4K/RAE1/HIST2H3A/POLR2F/HIST2H4B/HIST1H4I	11
turquoise	GO:0051290	protein heterotetramerization	7/532	48/17653	0.000547202	0.0438969	0.0420549	HIST1H4H/HIST1H4J/HIST1H4D/HIST1H4F/HIST1H4K/HIST2H4B/HIST1H4I	7
turquoise	GO:0050435	amyloid-beta metabolic process	6/532	35/17653	0.000561645	0.0438969	0.0420549	APH1A/PSEN2/GSK3A/APP/BACE1/PSENEN	6
turquoise	GO:1901532	regulation of hematopoietic progenitor cell differentiation	11/532	112/17653	0.000565921	0.0438969	0.0420549	HIST1H4H/PSMC1/HIST1H4J/HIST1H4D/GATA3/HIST1H4F/HIST1H4K/HIST2H3A/SETD1A/HIST2H4B/HIST1H4I	11
turquoise	GO:0016570	histone modification	27/532	450/17653	0.00056967	0.0438969	0.0420549	TBL1Y/SKI/CTBP1/CDK9/RIOX1/JARID2/UBE2A/C6orf89/GATA3/PIH1D1/MIER2/KMT2D/TBL1X/PCGF1/REST/ZNHIT1/PHF8/KAT6A/WDR70/KDM4A/ASXL1/SETD1A/SIN3A/SMARCB1/SIRT3/ING5/MRGBP	27
turquoise	GO:0060218	hematopoietic stem cell differentiation	11/532	113/17653	0.000610299	0.0461567	0.0442199	HIST1H4H/PSMC1/HIST1H4J/HIST1H4D/GATA3/HIST1H4F/HIST1H4K/HIST2H3A/SETD1A/HIST2H4B/HIST1H4I	11
turquoise	GO:0006333	chromatin assembly or disassembly	15/532	190/17653	0.000658439	0.0488921	0.0468406	CHAF1A/HIST1H4H/MIS18A/CENPP/HIST1H4J/HIST1H4D/HIST1H4F/HIST1H4K/KAT6A/HIST2H3A/HIST2H4B/SMARCB1/HIST1H4I/H2AFX/TLK2	15

## Sheet: brown
Cluster	ID	Description	GeneRatio	BgRatio	pvalue	p.adjust	qvalue	geneID	Count
brown	GO:0034470	ncRNA processing	38/541	425/17653	3.7086e-09	1.47751e-05	1.46314e-05	SRRT/METTL2B/TEX10/USP36/POP7/INTS11/SNU13/RNF113A/RRP36/PTCD1/REXO4/PUSL1/BUD23/RRP8/DDX56/MRPS9/TRPT1/POP5/NSUN4/UTP23/GTPBP3/MTERF4/NOP14/NHP2/ELP5/YBEY/RPUSD2/TSR2/PA2G4/ELAC2/SARS/ELP6/CDK5RAP1/POP1/RBFA/MRM3/SMAD3/METTL16	38
brown	GO:0005759	mitochondrial matrix	37/569	453/18698	5.54797e-08	2.79063e-05	2.49367e-05	GOT2/PPM1K/NDUFB8/PTCD1/BDH1/SARDH/MRPL14/DDX28/GSTK1/MRPS9/NAXE/MRPS26/PDHA1/FASTK/NSUN4/MRPL27/TOP1MT/MTERF4/NDUFA7/SOD1/CA5B/GRPEL1/SIRT5/FDXR/CLPP/CS/NDUFA10/HIBCH/ELAC2/MRPS17/MRPL58/DTYMK/FXN/MRPS24/MRM3/QARS/MRPS5	37
brown	GO:0044455	mitochondrial membrane part	23/569	220/18698	2.77187e-07	6.97125e-05	6.22941e-05	COX5B/NDUFB8/TOMM40/BCS1L/SURF1/UQCR10/SLC25A19/ATP5PD/TMEM177/TOMM40L/BDH1/BNIP3/MFN2/NDUFB9/TAMM41/SDHA/TOMM20/NDUFA7/GRPEL1/UQCC3/NDUFA10/RHOT2/TIMM10B	23
brown	GO:0098798	mitochondrial protein complex	25/569	263/18698	5.21809e-07	8.74899e-05	7.81798e-05	COX5B/NDUFB8/TOMM40/BCS1L/UQCR10/ATP5PD/TOMM40L/MRPL14/MRPS9/MRPS26/NDUFB9/NSUN4/SDHA/MRPL27/TOMM20/MTERF4/NDUFA7/GRPEL1/UQCC3/NDUFA10/MRPS17/MRPL58/MRPS24/TIMM10B/MRPS5	25
brown	GO:0000313	organellar ribosome	11/569	85/18698	5.22656e-05	0.00525792	0.0046984	MRPL14/MRPS9/MRPS26/NSUN4/MRPL27/MTERF4/NDUFA7/MRPS17/MRPL58/MRPS24/MRPS5	11
brown	GO:0005761	mitochondrial ribosome	11/569	85/18698	5.22656e-05	0.00525792	0.0046984	MRPL14/MRPS9/MRPS26/NSUN4/MRPL27/MTERF4/NDUFA7/MRPS17/MRPL58/MRPS24/MRPS5	11
brown	GO:0006839	mitochondrial transport	27/541	328/17653	3.42695e-06	0.00682648	0.0067601	COX5B/HIP1R/ZDHHC8/USP36/NDUFB8/TOMM40/VPS35/SLC25A19/ATP5PD/TOMM40L/UBE2L3/ARIH2/SAE1/BNIP3/MFN2/NMUR1/TOMM20/MTERF4/PPP3CC/NMT1/DYNLL2/GRPEL1/RTL10/ACACB/ACACA/RHOT2/TIMM10B	27
brown	GO:0031300	intrinsic component of organelle membrane	17/569	193/18698	8.91996e-05	0.0074779	0.00668215	PEX11B/TOMM40/TRABD2A/SLC25A19/TMEM177/P2RX4/BNIP3/MFN2/CHST12/SYS1/RER1/LFNG/TOMM20/UQCC3/SLC39A13/MAN1C1/RHOT2	17
brown	GO:0031301	integral component of organelle membrane	16/569	177/18698	0.000105256	0.0075634	0.00675854	PEX11B/TOMM40/TRABD2A/SLC25A19/TMEM177/P2RX4/BNIP3/CHST12/SYS1/RER1/LFNG/TOMM20/UQCC3/SLC39A13/MAN1C1/RHOT2	16
brown	GO:0005746	mitochondrial respiratory chain	10/569	93/18698	0.000527297	0.0331538	0.0296257	COX5B/NDUFB8/BCS1L/SURF1/UQCR10/NDUFB9/SDHA/NDUFA7/UQCC3/NDUFA10	10
brown	GO:0031306	intrinsic component of mitochondrial outer membrane	5/569	24/18698	0.000674278	0.0339162	0.030307	TOMM40/BNIP3/MFN2/TOMM20/RHOT2	5
brown	GO:0046540	U4/U6 x U5 tri-snRNP complex	5/569	24/18698	0.000674278	0.0339162	0.030307	SNU13/NAA38/PPIH/TXNL4A/LSM2	5
brown	GO:0022613	ribonucleoprotein complex biogenesis	32/541	475/17653	2.82366e-05	0.0374982	0.0371336	TEX10/USP36/SNU13/RRP36/CNOT2/EFL1/REXO4/DDX28/BUD23/RRP8/TXNL4A/DDX56/MRPS9/NSUN4/SETD4/UTP23/MTERF4/NOP14/NHP2/YBEY/RPUSD2/PATL2/ZNF593/TSR2/PA2G4/SF3A3/PRPF19/RBFA/MRM3/LUC7L/METTL16/POLR2D	32
brown	GO:0070469	respiratory chain	10/569	100/18698	0.000935089	0.0394098	0.0352161	COX5B/NDUFB8/BCS1L/SURF1/UQCR10/NDUFB9/SDHA/NDUFA7/UQCC3/NDUFA10	10
brown	GO:0098803	respiratory chain complex	9/569	85/18698	0.00110771	0.0394098	0.0352161	COX5B/NDUFB8/BCS1L/UQCR10/NDUFB9/SDHA/NDUFA7/UQCC3/NDUFA10	9
brown	GO:0005732	small nucleolar ribonucleoprotein complex	5/569	27/18698	0.00118784	0.0394098	0.0352161	POP7/SNU13/POP5/NHP2/POP1	5
brown	GO:0032839	dendrite cytoplasm	5/569	27/18698	0.00118784	0.0394098	0.0352161	HIP1R/TRAK1/KLHL17/SOD1/ADA	5
brown	GO:0098800	inner mitochondrial membrane protein complex	12/569	141/18698	0.00127026	0.0394098	0.0352161	COX5B/NDUFB8/BCS1L/UQCR10/ATP5PD/NDUFB9/SDHA/NDUFA7/GRPEL1/UQCC3/NDUFA10/TIMM10B	12
brown	GO:0098573	intrinsic component of mitochondrial membrane	8/569	71/18698	0.00138153	0.0394098	0.0352161	TOMM40/SLC25A19/TMEM177/BNIP3/MFN2/TOMM20/UQCC3/RHOT2	8
brown	GO:0000314	organellar small ribosomal subunit	5/569	28/18698	0.00141029	0.0394098	0.0352161	MRPS9/MRPS26/MRPS17/MRPS24/MRPS5	5
brown	GO:0005763	mitochondrial small ribosomal subunit	5/569	28/18698	0.00141029	0.0394098	0.0352161	MRPS9/MRPS26/MRPS17/MRPS24/MRPS5	5
brown	GO:0042254	ribosome biogenesis	25/541	335/17653	4.12892e-05	0.0411241	0.0407242	TEX10/USP36/SNU13/RRP36/EFL1/REXO4/DDX28/BUD23/RRP8/DDX56/MRPS9/NSUN4/SETD4/UTP23/MTERF4/NOP14/NHP2/YBEY/RPUSD2/ZNF593/TSR2/PA2G4/RBFA/MRM3/METTL16	25
brown	GO:0016072	rRNA metabolic process	23/541	299/17653	5.23542e-05	0.0417159	0.0413103	TEX10/USP36/SNU13/RRP36/REXO4/BUD23/RRP8/DDX56/MRPS9/NSUN4/BRF1/SMARCA4/UTP23/MTERF4/NOP14/NHP2/YBEY/RPUSD2/TSR2/PA2G4/RBFA/MRM3/METTL16	23
brown	GO:0043596	nuclear replication fork	6/569	42/18698	0.00159787	0.0423016	0.0378001	SMARCAL1/TIMELESS/ZMIZ2/TOP1MT/PRPF19/MCM3	6
brown	GO:0006364	rRNA processing	21/541	265/17653	7.18992e-05	0.0477411	0.0472769	TEX10/USP36/SNU13/RRP36/REXO4/BUD23/RRP8/DDX56/MRPS9/NSUN4/UTP23/MTERF4/NOP14/NHP2/YBEY/RPUSD2/TSR2/PA2G4/RBFA/MRM3/METTL16	21
brown	GO:0097526	spliceosomal tri-snRNP complex	5/569	30/18698	0.00194512	0.0489198	0.043714	SNU13/NAA38/PPIH/TXNL4A/LSM2	5
brown	GO:0030173	integral component of Golgi membrane	6/569	44/18698	0.00204281	0.0489302	0.0437233	CHST12/SYS1/RER1/LFNG/SLC39A13/MAN1C1	6
brown	GO:0072655	establishment of protein localization to mitochondrion	17/541	192/17653	9.05329e-05	0.0495529	0.049071	ZDHHC8/USP36/NDUFB8/TOMM40/TOMM40L/UBE2L3/ARIH2/SAE1/MFN2/NMUR1/TOMM20/MTERF4/PPP3CC/NMT1/DYNLL2/GRPEL1/TIMM10B	17
brown	GO:0070585	protein localization to mitochondrion	17/541	195/17653	0.000109558	0.0495529	0.049071	ZDHHC8/USP36/NDUFB8/TOMM40/TOMM40L/UBE2L3/ARIH2/SAE1/MFN2/NMUR1/TOMM20/MTERF4/PPP3CC/NMT1/DYNLL2/GRPEL1/TIMM10B	17
brown	GO:0008033	tRNA processing	13/541	124/17653	0.000111942	0.0495529	0.049071	METTL2B/POP7/PTCD1/PUSL1/TRPT1/POP5/GTPBP3/ELP5/ELAC2/SARS/ELP6/CDK5RAP1/POP1	13

## Sheet: darkgreen
Cluster	ID	Description	GeneRatio	BgRatio	pvalue	p.adjust	qvalue	geneID	Count
darkgreen	GO:0008380	RNA splicing	30/397	432/17653	5.00861e-08	0.000181412	0.000172454	PPWD1/MAGOHB/DDX1/SRSF8/SRSF6/CELF2/HNRNPC/CDC40/RNPC3/PPP1R8/TARDBP/SNRNP27/CIR1/GEMIN6/STRAP/FRG1/SMNDC1/LSM8/LSM6/RBM17/WTAP/TEP1/PCF11/THOC2/PRPF4B/NUP98/WDR33/METTL3/ZNF638/SF3A3	30
darkgreen	GO:0006397	mRNA processing	31/397	495/17653	2.99804e-07	0.000542944	0.000516136	PPWD1/MAGOHB/DDX1/SRSF8/SRSF6/CELF2/HNRNPC/CDC40/FASTKD5/RNPC3/PPP1R8/TARDBP/SNRNP27/CIR1/GEMIN6/STRAP/FRG1/SUPT4H1/SMNDC1/ZC3H14/LSM8/LSM6/RBM17/WTAP/PCF11/THOC2/PRPF4B/NUP98/WDR33/METTL3/SF3A3	31
darkgreen	GO:0018205	peptidyl-lysine modification	26/397	390/17653	8.69345e-07	0.00101691	0.0009667	MYB/ING3/AUTS2/BRD7/SENP1/CTNNB1/GNL3/BCL11A/ATRX/NUP107/SETDB2/JADE1/TAF1/YEATS2/METTL21A/NDC1/NUP133/GCSH/RLF/NUP98/CREBBP/KANSL2/NUP153/KMT2E/BRD1/MECP2	26
darkgreen	GO:0000377	RNA splicing, via transesterification reactions with bulged adenosine as nucleophile	23/397	326/17653	1.44071e-06	0.00101691	0.0009667	PPWD1/MAGOHB/DDX1/SRSF6/CELF2/HNRNPC/CDC40/RNPC3/SNRNP27/GEMIN6/STRAP/FRG1/SMNDC1/LSM8/LSM6/RBM17/WTAP/PCF11/PRPF4B/NUP98/WDR33/METTL3/SF3A3	23
darkgreen	GO:0000398	mRNA splicing, via spliceosome	23/397	326/17653	1.44071e-06	0.00101691	0.0009667	PPWD1/MAGOHB/DDX1/SRSF6/CELF2/HNRNPC/CDC40/RNPC3/SNRNP27/GEMIN6/STRAP/FRG1/SMNDC1/LSM8/LSM6/RBM17/WTAP/PCF11/PRPF4B/NUP98/WDR33/METTL3/SF3A3	23
darkgreen	GO:0000375	RNA splicing, via transesterification reactions	23/397	329/17653	1.68456e-06	0.00101691	0.0009667	PPWD1/MAGOHB/DDX1/SRSF6/CELF2/HNRNPC/CDC40/RNPC3/SNRNP27/GEMIN6/STRAP/FRG1/SMNDC1/LSM8/LSM6/RBM17/WTAP/PCF11/PRPF4B/NUP98/WDR33/METTL3/SF3A3	23
darkgreen	GO:0005681	spliceosomal complex	15/421	190/18698	2.75628e-05	0.00374884	0.0034058	PPWD1/MAGOHB/HNRNPC/CDC40/RNPC3/WAC/PPP1R8/FRG1/SMNDC1/LSM8/LSM6/RBM17/TEP1/PRPF4B/SF3A3	15
darkgreen	GO:0098798	mitochondrial protein complex	18/421	263/18698	3.09425e-05	0.00374884	0.0034058	MRPL30/APOO/UQCRC2/MRPS36/MRPS6/TRMT10C/ATP5MPL/TIMM9/MRPS14/MRPS10/MRPS35/NDUFAF1/MRPS18B/ATP5MD/MRPL48/UQCRH/NDUFB3/NDUFB5	18
darkgreen	GO:0000314	organellar small ribosomal subunit	6/421	28/18698	3.11107e-05	0.00374884	0.0034058	MRPS36/MRPS6/MRPS14/MRPS10/MRPS35/MRPS18B	6
darkgreen	GO:0005763	mitochondrial small ribosomal subunit	6/421	28/18698	3.11107e-05	0.00374884	0.0034058	MRPS36/MRPS6/MRPS14/MRPS10/MRPS35/MRPS18B	6
darkgreen	GO:0006999	nuclear pore organization	5/397	15/17653	1.39869e-05	0.00723722	0.00687987	NUP107/NDC1/NUP133/NUP98/NUP153	5
darkgreen	GO:0032259	methylation	22/397	355/17653	1.91503e-05	0.00867032	0.00824221	MYB/AUTS2/BCDIN3D/PRDM8/DNMT3A/CTNNB1/TRMT10C/ATRX/SETDB2/DIMT1/METTL21A/GCSH/WTAP/TPMT/FTSJ1/RLF/SMYD4/METTL3/NDUFAF7/KMT2E/HENMT1/MECP2	22
darkgreen	GO:0006998	nuclear envelope organization	10/397	86/17653	2.28452e-05	0.00886358	0.00842592	NUP107/TARDBP/GPER1/NDC1/NUP133/PRKCA/TOR1A/NUP98/NUP153/NEK9	10
darkgreen	GO:0006997	nucleus organization	13/397	145/17653	2.44715e-05	0.00886358	0.00842592	NUP107/CHMP1B/TARDBP/GPER1/NOLC1/NDC1/NUP133/PRKCA/TBPL1/TOR1A/NUP98/NUP153/NEK9	13
darkgreen	GO:0051292	nuclear pore complex assembly	4/397	10/17653	4.75246e-05	0.0155669	0.0147983	NUP107/NDC1/NUP98/NUP153	4
darkgreen	GO:0007077	mitotic nuclear envelope disassembly	7/397	44/17653	5.15745e-05	0.0155669	0.0147983	NUP107/NDC1/NUP133/PRKCA/NUP98/NUP153/NEK9	7
darkgreen	GO:0015935	small ribosomal subunit	8/421	73/18698	0.000231189	0.0212273	0.0192849	MCTS1/MRPS36/MRPS6/MRPS14/MRPS10/MRPS35/MRPS18B/LARP4	8
darkgreen	GO:0005759	mitochondrial matrix	23/421	453/18698	0.00026424	0.0212273	0.0192849	MRPL30/ISCU/PDP1/MRPS36/FASTKD5/MRPS6/TRMT10C/ATXN3/ARL2BP/CBR4/NR3C1/MRPS14/VDAC2/DIMT1/TRNT1/MRPS10/FASTKD2/MRPS35/GCSH/MRPS18B/MRPL48/ACADSB/NDUFAF7	23
darkgreen	GO:0030397	membrane disassembly	7/397	48/17653	9.17286e-05	0.0237315	0.0225597	NUP107/NDC1/NUP133/PRKCA/NUP98/NUP153/NEK9	7
darkgreen	GO:0051081	nuclear envelope disassembly	7/397	48/17653	9.17286e-05	0.0237315	0.0225597	NUP107/NDC1/NUP133/PRKCA/NUP98/NUP153/NEK9	7
darkgreen	GO:0010256	endomembrane system organization	23/397	427/17653	0.000108518	0.0262034	0.0249096	WHAMM/NUP107/AKAP9/CHMP1B/BAG5/TARDBP/RAB3GAP2/GPER1/DYM/ATL2/NDC1/NUP133/PRKCA/TBPL1/PIK3C3/AKTIP/TOR1A/GOLPH3L/NUP98/VPS36/NUP153/NEK9/SCARB2	23
darkgreen	GO:0043414	macromolecule methylation	18/397	294/17653	0.000126748	0.0286926	0.0272759	MYB/AUTS2/BCDIN3D/DNMT3A/CTNNB1/TRMT10C/ATRX/SETDB2/DIMT1/METTL21A/WTAP/FTSJ1/RLF/METTL3/NDUFAF7/KMT2E/HENMT1/MECP2	18
darkgreen	GO:0009167	purine ribonucleoside monophosphate metabolic process	19/397	323/17653	0.000139726	0.0292629	0.027818	UQCRC2/NUP107/NDUFAF1/DNM1L/NDC1/NUP133/NUDT3/GMPS/OLA1/NUP98/PFKFB2/UQCRH/NDUFAF7/NUP153/NDUFB3/AK2/MECP2/NDUFB5/PID1	19
darkgreen	GO:0009126	purine nucleoside monophosphate metabolic process	19/397	324/17653	0.000145426	0.0292629	0.027818	UQCRC2/NUP107/NDUFAF1/DNM1L/NDC1/NUP133/NUDT3/GMPS/OLA1/NUP98/PFKFB2/UQCRH/NDUFAF7/NUP153/NDUFB3/AK2/MECP2/NDUFB5/PID1	19
darkgreen	GO:0016607	nuclear speck	20/421	381/18698	0.000430875	0.0296688	0.026954	SRSF8/SRSF6/NFKBIZ/WAC/PPP1R8/JADE1/PLAG1/CIR1/NR3C1/SMNDC1/ZC3H14/HP1BP3/WTAP/THOC2/PRPF4B/METTL3/ZNF638/KMT2E/SF3A3/BRD1	20
darkgreen	GO:0140030	modification-dependent protein binding	12/404	131/17548	5.07387e-05	0.0308491	0.0297489	BRCC3/ING3/MSH6/BRD7/UBQLN1/ATRX/TRIM24/TAF1/YEATS2/EPS15/KMT2E/PHF2	12
darkgreen	GO:0070126	mitochondrial translational termination	9/397	89/17653	0.000174738	0.0333107	0.0316659	MRPL30/MTRF1/MRPS36/MRPS6/MRPS14/MRPS10/MRPS35/MRPS18B/MRPL48	9
darkgreen	GO:0006406	mRNA export from nucleus	10/397	111/17653	0.000202266	0.033647	0.0319857	MAGOHB/SRSF6/CDC40/NUP107/NDC1/NUP133/THOC2/NUP98/WDR33/NUP153	10
darkgreen	GO:0071427	mRNA-containing ribonucleoprotein complex export from nucleus	10/397	111/17653	0.000202266	0.033647	0.0319857	MAGOHB/SRSF6/CDC40/NUP107/NDC1/NUP133/THOC2/NUP98/WDR33/NUP153	10
darkgreen	GO:0140053	mitochondrial gene expression	12/397	155/17653	0.000204372	0.033647	0.0319857	MRPL30/MTRF1/MRPS36/FASTKD5/MRPS6/TRMT10C/MRPS14/TRNT1/MRPS10/MRPS35/MRPS18B/MRPL48	12
darkgreen	GO:0000313	organellar ribosome	8/421	85/18698	0.000654955	0.0350765	0.0318668	MRPL30/MRPS36/MRPS6/MRPS14/MRPS10/MRPS35/MRPS18B/MRPL48	8
darkgreen	GO:0005761	mitochondrial ribosome	8/421	85/18698	0.000654955	0.0350765	0.0318668	MRPL30/MRPS36/MRPS6/MRPS14/MRPS10/MRPS35/MRPS18B/MRPL48	8
darkgreen	GO:0009161	ribonucleoside monophosphate metabolic process	19/397	336/17653	0.000231573	0.0364413	0.034642	UQCRC2/NUP107/NDUFAF1/DNM1L/NDC1/NUP133/NUDT3/GMPS/OLA1/NUP98/PFKFB2/UQCRH/NDUFAF7/NUP153/NDUFB3/AK2/MECP2/NDUFB5/PID1	19
darkgreen	GO:0044766	multi-organism transport	8/397	74/17653	0.000251528	0.0364413	0.034642	NUP107/EPS15/NDC1/NUP133/THOC2/KPNA3/NUP98/NUP153	8
darkgreen	GO:1902579	multi-organism localization	8/397	74/17653	0.000251528	0.0364413	0.034642	NUP107/EPS15/NDC1/NUP133/THOC2/KPNA3/NUP98/NUP153	8
darkgreen	GO:0032984	protein-containing complex disassembly	18/397	314/17653	0.000285171	0.0385042	0.036603	MCTS1/MRPL30/MTRF1/MRPS36/ADRB2/UBQLN1/CTNNB1/PBRM1/MRPS6/DSTN/CHMP1B/MRPS14/MRPS10/MRPS35/EPG5/MRPS18B/MRPL48/NAPB	18
darkgreen	GO:0016925	protein sumoylation	9/397	95/17653	0.000287027	0.0385042	0.036603	SENP1/CTNNB1/GNL3/BCL11A/NUP107/NDC1/NUP133/NUP98/NUP153	9
darkgreen	GO:0016569	covalent chromatin modification	23/397	464/17653	0.000360461	0.0432324	0.0410977	MYB/BRCC3/ING3/AUTS2/BRD7/SUDS3/DNMT3A/CTNNB1/ATRX/WAC/SETDB2/JADE1/TAF1/YEATS2/PRKCA/RLF/USP16/CREBBP/KANSL2/KMT2E/PHF2/BRD1/MECP2	23
darkgreen	GO:1900034	regulation of cellular response to heat	8/397	78/17653	0.000361971	0.0432324	0.0410977	NUP107/BAG5/NDC1/NUP133/HSPH1/NUP98/CREBBP/NUP153	8
darkgreen	GO:0046931	pore complex assembly	4/397	16/17653	0.000370018	0.0432324	0.0410977	NUP107/NDC1/NUP98/NUP153	4
darkgreen	GO:0051571	positive regulation of histone H3-K4 methylation	4/397	16/17653	0.000370018	0.0432324	0.0410977	MYB/AUTS2/CTNNB1/KMT2E	4
darkgreen	GO:0008168	methyltransferase activity	15/404	215/17548	0.000143327	0.0435714	0.0420174	BCDIN3D/PRDM8/DNMT3A/TRMT10C/SETDB2/DIMT1/METTL21A/GCSH/TPMT/FTSJ1/SMYD4/METTL3/NDUFAF7/KMT2E/HENMT1	15
darkgreen	GO:0009123	nucleoside monophosphate metabolic process	19/397	352/17653	0.000414011	0.0464424	0.0441492	UQCRC2/NUP107/NDUFAF1/DNM1L/NDC1/NUP133/NUDT3/GMPS/OLA1/NUP98/PFKFB2/UQCRH/NDUFAF7/NUP153/NDUFB3/AK2/MECP2/NDUFB5/PID1	19
darkgreen	GO:0046794	transport of virus	7/397	61/17653	0.000423136	0.0464424	0.0441492	NUP107/EPS15/NDC1/NUP133/KPNA3/NUP98/NUP153	7
darkgreen	GO:1990204	oxidoreductase complex	9/421	112/18698	0.000971978	0.0468494	0.0425624	UQCRC2/MRPS36/CBR4/NDUFAF1/GCSH/RRM1/UQCRH/NDUFB3/NDUFB5	9
darkgreen	GO:0051188	cofactor biosynthetic process	17/397	298/17653	0.000441683	0.0470522	0.0447289	MPC1/PDP1/ACSL5/CPOX/TMEM14C/PPCS/NUP107/CBR4/GGCT/KMO/NDC1/NUP133/GCLC/NUP98/PFKFB2/NUP153/HSD17B12	17

## Sheet: darkred
Cluster	ID	Description	GeneRatio	BgRatio	pvalue	p.adjust	qvalue	geneID	Count
darkred	GO:0016684	oxidoreductase activity, acting on peroxide as acceptor	6/163	49/17548	5.88667e-06	0.00119717	0.00111752	PTGS1/GPX1/PRDX5/PRDX2/SESN3/PRDX6	6
darkred	GO:0031625	ubiquitin protein ligase binding	13/163	309/17548	6.45375e-06	0.00119717	0.00111752	UBE2F/UBE2V1/BAG6/UBA52/PCBP2/ATP6V0C/PINK1/FBXO7/CASC3/CLU/CDC34/PRDX6/PRKAR2B	13
darkred	GO:0044389	ubiquitin-like protein ligase binding	13/163	323/17548	1.03828e-05	0.00128401	0.00119857	UBE2F/UBE2V1/BAG6/UBA52/PCBP2/ATP6V0C/PINK1/FBXO7/CASC3/CLU/CDC34/PRDX6/PRKAR2B	13
darkred	GO:0010498	proteasomal protein catabolic process	17/164	453/17653	1.12878e-06	0.00242323	0.00209459	DCAF11/BAG6/GPX1/UBB/UBA52/PSME4/FBXO9/PSMF1/PCBP2/PINK1/CLU/DDB1/UBE2D3/AMFR/CDC34/ANAPC1/UBXN6	17
darkred	GO:0042744	hydrogen peroxide catabolic process	5/164	23/17653	1.91333e-06	0.00242323	0.00209459	SNCA/GPX1/PRDX5/PRDX2/PRDX6	5
darkred	GO:0042743	hydrogen peroxide metabolic process	6/164	45/17653	3.54032e-06	0.00264072	0.00228258	SNCA/GPX1/PINK1/PRDX5/PRDX2/PRDX6	6
darkred	GO:0000209	protein polyubiquitination	13/164	298/17653	4.37226e-06	0.00264072	0.00228258	UBE2V1/UBB/UBA52/PSME4/FBXO9/PSMF1/MARCH8/MKRN1/FBXO7/UBE2D3/AMFR/CDC34/ANAPC1	13
darkred	GO:0017001	antibiotic catabolic process	6/164	48/17653	5.21263e-06	0.00264072	0.00228258	SNCA/GPX1/NPL/PRDX5/PRDX2/PRDX6	6
darkred	GO:0038201	TOR complex	4/171	16/18698	1.12809e-05	0.00326019	0.00283805	PINK1/AKT1S1/PRR5/SESN3	4
darkred	GO:0070628	proteasome binding	4/163	21/17548	3.79611e-05	0.00352089	0.00328663	BAG6/UBA52/PSME4/PSMF1	4
darkred	GO:0004601	peroxidase activity	5/163	45/17548	5.88448e-05	0.00436628	0.00407578	PTGS1/GPX1/PRDX5/PRDX2/PRDX6	5
darkred	GO:0071158	positive regulation of cell cycle arrest	7/164	88/17653	1.77394e-05	0.00748898	0.00647333	TFDP1/UBB/UBA52/FOXO4/MED25/RGCC/PPP2R5B	7
darkred	GO:0016209	antioxidant activity	6/163	84/17548	0.00013094	0.00809644	0.00755775	PTGS1/GPX1/PRDX5/PRDX2/SRXN1/PRDX6	6
darkred	GO:0043161	proteasome-mediated ubiquitin-dependent protein catabolic process	14/164	403/17653	2.46627e-05	0.00892439	0.00771406	DCAF11/BAG6/UBB/UBA52/PSME4/FBXO9/PSMF1/PCBP2/CLU/DDB1/UBE2D3/AMFR/CDC34/ANAPC1	14
darkred	GO:0016234	inclusion body	6/171	80/18698	9.20153e-05	0.0132962	0.0115746	SNCA/GPX1/STRADB/PINK1/FBXO7/CLU	6
darkred	GO:0010821	regulation of mitochondrion organization	10/164	226/17653	5.103e-05	0.0161574	0.0139661	TFDP1/BNIP3L/GPX1/CYB5R1/FIS1/PPP3R1/PINK1/FBXO7/CLU/UBE2D3	10
darkred	GO:0072655	establishment of protein localization to mitochondrion	9/164	192/17653	7.84531e-05	0.0187653	0.0162204	TFDP1/BNIP3L/CYB5R1/FIS1/PPP3R1/PINK1/FBXO7/UBE2D3/HK1	9
darkred	GO:0015893	drug transport	9/164	195/17653	8.83561e-05	0.0187653	0.0162204	HBG1/SNCA/SLC6A8/SLC25A38/RALBP1/SLC38A5/PINK1/HBM/SLC1A5	9
darkred	GO:0070585	protein localization to mitochondrion	9/164	195/17653	8.83561e-05	0.0187653	0.0162204	TFDP1/BNIP3L/CYB5R1/FIS1/PPP3R1/PINK1/FBXO7/UBE2D3/HK1	9
darkred	GO:0071156	regulation of cell cycle arrest	7/164	113/17653	8.89002e-05	0.0187653	0.0162204	TFDP1/UBB/UBA52/FOXO4/MED25/RGCC/PPP2R5B	7
darkred	GO:0031932	TORC2 complex	3/171	13/18698	0.00020094	0.0193572	0.0168508	PINK1/PRR5/SESN3	3
darkred	GO:0080008	Cul4-RING E3 ubiquitin ligase complex	4/171	36/18698	0.000316577	0.0228727	0.019911	DCAF11/DCAF10/DCAF6/DDB1	4
darkred	GO:0031092	platelet alpha granule membrane	3/171	17/18698	0.00046507	0.0235732	0.0205209	SNCA/CYB5R1/ITGA2B	3
darkred	GO:0031968	organelle outer membrane	8/171	201/18698	0.000534913	0.0235732	0.0205209	SNCA/BNIP3L/UBB/FIS1/UBA52/PINK1/FUNDC2/HK1	8
darkred	GO:0019867	outer membrane	8/171	203/18698	0.000570978	0.0235732	0.0205209	SNCA/BNIP3L/UBB/FIS1/UBA52/PINK1/FUNDC2/HK1	8
darkred	GO:1901988	negative regulation of cell cycle phase transition	10/164	256/17653	0.000143344	0.0264815	0.02289	TFDP1/UBB/UBA52/PSME4/FOXO4/PSMF1/BABAM1/FBXO7/RGCC/CTDSP2	10
darkred	GO:0006914	autophagy	14/164	482/17653	0.000166934	0.0264815	0.02289	SNCA/BNIP3L/UBB/FIS1/UBA52/ATP6V0C/PINK1/FBXO7/FUNDC2/CLU/SESN3/CHMP4B/UBXN6/MCOLN1	14
darkred	GO:0061919	process utilizing autophagic mechanism	14/164	482/17653	0.000166934	0.0264815	0.02289	SNCA/BNIP3L/UBB/FIS1/UBA52/ATP6V0C/PINK1/FBXO7/FUNDC2/CLU/SESN3/CHMP4B/UBXN6/MCOLN1	14
darkred	GO:0008637	apoptotic mitochondrial changes	7/164	125/17653	0.000167273	0.0264815	0.02289	TFDP1/BNIP3L/GPX1/FIS1/PPP3R1/PINK1/CLU	7
darkred	GO:0051187	cofactor catabolic process	5/164	57/17653	0.000184554	0.0274986	0.0237692	SNCA/GPX1/PRDX5/PRDX2/PRDX6	5
darkred	GO:2001233	regulation of apoptotic signaling pathway	12/164	383/17653	0.000248582	0.032527	0.0281156	TFDP1/LGALS3/YBX3/GPX1/STRADB/GRINA/UBB/FIS1/PPP3R1/GATA1/PINK1/CLU	12
darkred	GO:0006839	mitochondrial transport	11/164	328/17653	0.000253443	0.032527	0.0281156	TFDP1/BNIP3L/SLC25A38/CYB5R1/FIS1/SLC25A39/PPP3R1/MCUR1/PINK1/FBXO7/UBE2D3	11
darkred	GO:0042737	drug catabolic process	7/164	134/17653	0.000256826	0.032527	0.0281156	FAH/SNCA/GPX1/NPL/PRDX5/PRDX2/PRDX6	7
darkred	GO:0010008	endosome membrane	12/171	451/18698	0.000930982	0.0336317	0.0292769	UBAP1/RILP/UBB/UBA52/MARCH8/ATP6V0C/AP2A1/MARCH2/UBE2D3/CHMP4B/UBXN6/MCOLN1	12
darkred	GO:0098869	cellular oxidant detoxification	6/164	97/17653	0.000288645	0.0339897	0.02938	PTGS1/GPX1/PRDX5/PRDX2/SRXN1/PRDX6	6
darkred	GO:1901214	regulation of neuron death	10/164	281/17653	0.000303476	0.0339897	0.02938	SNCA/GPX1/UBB/FIS1/PINK1/FBXO7/AKT1S1/CLU/CDC34/CHMP4B	10
darkred	GO:0016999	antibiotic metabolic process	7/164	139/17653	0.000321188	0.0339897	0.02938	SNCA/GPX1/NPL/PINK1/PRDX5/PRDX2/PRDX6	7
darkred	GO:1901987	regulation of cell cycle phase transition	13/164	454/17653	0.000328538	0.0339897	0.02938	TFDP1/UBB/UBA52/PSME4/ADAM17/FOXO4/PSMF1/BABAM1/FBXO7/DDB1/RGCC/CTDSP2/PRKAR2B	13
darkred	GO:0006778	porphyrin-containing compound metabolic process	4/164	36/17653	0.000335469	0.0339897	0.02938	ALAS2/SLC25A38/SLC25A39/EIF2AK1	4
darkred	GO:0031307	integral component of mitochondrial outer membrane	3/171	23/18698	0.0011634	0.0341301	0.0297108	FIS1/PINK1/FUNDC2	3
darkred	GO:0005741	mitochondrial outer membrane	7/171	178/18698	0.00127462	0.0341301	0.0297108	BNIP3L/UBB/FIS1/UBA52/PINK1/FUNDC2/HK1	7
darkred	GO:0031306	intrinsic component of mitochondrial outer membrane	3/171	24/18698	0.00132071	0.0341301	0.0297108	FIS1/PINK1/FUNDC2	3
darkred	GO:0031091	platelet alpha granule	5/171	90/18698	0.00141717	0.0341301	0.0297108	SNCA/PPBP/CYB5R1/CLU/ITGA2B	5
darkred	GO:1990748	cellular detoxification	6/164	101/17653	0.000359084	0.0345622	0.0298749	PTGS1/GPX1/PRDX5/PRDX2/SRXN1/PRDX6	6
darkred	GO:1901991	negative regulation of mitotic cell cycle phase transition	9/164	236/17653	0.000368409	0.0345622	0.0298749	TFDP1/UBB/UBA52/PSME4/FOXO4/PSMF1/FBXO7/RGCC/CTDSP2	9
darkred	GO:0001666	response to hypoxia	11/164	346/17653	0.000398961	0.0360918	0.031197	ALAS2/BNIP3L/UBB/FIS1/UBA52/PSME4/ADAM17/PSMF1/PINK1/UBE2D3/RGCC	11
darkred	GO:0010948	negative regulation of cell cycle process	11/164	350/17653	0.000439405	0.0383798	0.0331747	TFDP1/UBB/UBA52/PSME4/FOXO4/PSMF1/BABAM1/FBXO7/RGCC/CTDSP2/PPP2R5B	11
darkred	GO:0031461	cullin-RING ubiquitin ligase complex	7/171	188/18698	0.00174348	0.038759	0.0337403	DCAF11/FBXO9/DCAF10/DCAF6/FBXO7/DDB1/ANAPC1	7
darkred	GO:0036293	response to decreased oxygen levels	11/164	354/17653	0.000483235	0.0404257	0.0349431	ALAS2/BNIP3L/UBB/FIS1/UBA52/PSME4/ADAM17/PSMF1/PINK1/UBE2D3/RGCC	11
darkred	GO:0042176	regulation of protein catabolic process	11/164	355/17653	0.000494748	0.0404257	0.0349431	SNCA/BAG6/GPX1/RILP/UBB/PSMF1/ODC1/OAZ1/PINK1/CLU/DDB1	11
darkred	GO:1902750	negative regulation of cell cycle G2/M phase transition	6/164	109/17653	0.000539881	0.0414883	0.0358616	UBB/UBA52/PSME4/FOXO4/PSMF1/BABAM1	6
darkred	GO:0071456	cellular response to hypoxia	8/164	199/17653	0.000552296	0.0414883	0.0358616	BNIP3L/UBB/UBA52/PSME4/PSMF1/PINK1/UBE2D3/RGCC	8
darkred	GO:1901990	regulation of mitotic cell cycle phase transition	12/164	419/17653	0.00055689	0.0414883	0.0358616	TFDP1/UBB/UBA52/PSME4/ADAM17/FOXO4/PSMF1/FBXO7/DDB1/RGCC/CTDSP2/PRKAR2B	12
darkred	GO:0044440	endosomal part	12/171	496/18698	0.00207637	0.0416485	0.0362557	UBAP1/RILP/UBB/UBA52/MARCH8/ATP6V0C/AP2A1/MARCH2/UBE2D3/CHMP4B/UBXN6/MCOLN1	12
darkred	GO:0000151	ubiquitin ligase complex	9/171	311/18698	0.00230402	0.0416485	0.0362557	DCAF11/UBE2V1/FBXO9/DCAF10/DCAF6/PINK1/FBXO7/DDB1/ANAPC1	9
darkred	GO:0044322	endoplasmic reticulum quality control compartment	3/171	29/18698	0.0023058	0.0416485	0.0362557	UBB/UBA52/AMFR	3
darkred	GO:0031146	SCF-dependent proteasomal ubiquitin-dependent protein catabolic process	5/164	73/17653	0.000587601	0.0425255	0.0367582	UBB/UBA52/PSME4/FBXO9/PSMF1	5
darkred	GO:0036294	cellular response to decreased oxygen levels	8/164	206/17653	0.00069299	0.0427766	0.0369752	BNIP3L/UBB/UBA52/PSME4/PSMF1/PINK1/UBE2D3/RGCC	8
darkred	GO:2001242	regulation of intrinsic apoptotic signaling pathway	7/164	159/17653	0.000719304	0.0427766	0.0369752	YBX3/GPX1/GRINA/UBB/FIS1/PINK1/CLU	7
darkred	GO:2000134	negative regulation of G1/S transition of mitotic cell cycle	6/164	116/17653	0.000750086	0.0427766	0.0369752	TFDP1/UBB/UBA52/FBXO7/RGCC/CTDSP2	6
darkred	GO:0019058	viral life cycle	10/164	316/17653	0.00075812	0.0427766	0.0369752	UBAP1/UBB/UBA52/STOM/PCBP2/DDB1/ITGB5/CHMP4B/SLC1A5/TNIP1	10
darkred	GO:0070997	neuron death	10/164	316/17653	0.00075812	0.0427766	0.0369752	SNCA/GPX1/UBB/FIS1/PINK1/FBXO7/AKT1S1/CLU/CDC34/CHMP4B	10
darkred	GO:0072401	signal transduction involved in DNA integrity checkpoint	5/164	78/17653	0.000795714	0.0427766	0.0369752	TFDP1/UBB/UBA52/BABAM1/RGCC	5
darkred	GO:0072422	signal transduction involved in DNA damage checkpoint	5/164	78/17653	0.000795714	0.0427766	0.0369752	TFDP1/UBB/UBA52/BABAM1/RGCC	5
darkred	GO:0006783	heme biosynthetic process	3/164	20/17653	0.000799017	0.0427766	0.0369752	ALAS2/SLC25A38/SLC25A39	3
darkred	GO:0060544	regulation of necroptotic process	3/164	20/17653	0.000799017	0.0427766	0.0369752	YBX3/UBB/UBA52	3
darkred	GO:0051701	interaction with host	8/164	211/17653	0.000810162	0.0427766	0.0369752	GUCY1A1/UBB/UBA52/DDB1/ITGB5/CHMP4B/SLC1A5/TNIP1	8
darkred	GO:0070482	response to oxygen levels	11/164	378/17653	0.000830347	0.0427766	0.0369752	ALAS2/BNIP3L/UBB/FIS1/UBA52/PSME4/ADAM17/PSMF1/PINK1/UBE2D3/RGCC	11
darkred	GO:0033238	regulation of cellular amine metabolic process	5/164	79/17653	0.000843185	0.0427766	0.0369752	SNCA/PSME4/PSMF1/ODC1/OAZ1	5
darkred	GO:0061418	regulation of transcription from RNA polymerase II promoter in response to hypoxia	5/164	79/17653	0.000843185	0.0427766	0.0369752	UBB/UBA52/PSME4/PSMF1/UBE2D3	5
darkred	GO:0072395	signal transduction involved in cell cycle checkpoint	5/164	79/17653	0.000843185	0.0427766	0.0369752	TFDP1/UBB/UBA52/BABAM1/RGCC	5
darkred	GO:0098754	detoxification	6/164	119/17653	0.000857455	0.0427766	0.0369752	PTGS1/GPX1/PRDX5/PRDX2/SRXN1/PRDX6	6
darkred	GO:2001234	negative regulation of apoptotic signaling pathway	8/164	213/17653	0.000861273	0.0427766	0.0369752	LGALS3/YBX3/GPX1/STRADB/GRINA/GATA1/PINK1/CLU	8
darkred	GO:0031145	anaphase-promoting complex-dependent catabolic process	5/164	80/17653	0.000892736	0.0434865	0.0375889	UBB/UBA52/PSME4/PSMF1/ANAPC1	5
darkred	GO:1904380	endoplasmic reticulum mannose trimming	3/164	21/17653	0.000925855	0.0442489	0.0382478	UBB/UBA52/AMFR	3
darkred	GO:0010822	positive regulation of mitochondrion organization	7/164	168/17653	0.000993896	0.0456743	0.03948	TFDP1/CYB5R1/FIS1/PPP3R1/PINK1/FBXO7/UBE2D3	7
darkred	GO:0032147	activation of protein kinase activity	10/164	328/17653	0.00100646	0.0456743	0.03948	UBE2V1/STRADB/UBB/UBA52/WNK1/PINK1/PRR5/RGCC/MAP2K3/PRKAR2B	10
darkred	GO:1902807	negative regulation of cell cycle G1/S phase transition	6/164	123/17653	0.00101861	0.0456743	0.03948	TFDP1/UBB/UBA52/FBXO7/RGCC/CTDSP2	6
darkred	GO:0000717	nucleotide-excision repair, DNA duplex unwinding	3/164	22/17653	0.00106476	0.0456743	0.03948	UBB/UBA52/DDB1	3
darkred	GO:0000422	autophagy of mitochondrion	5/164	84/17653	0.00111287	0.0456743	0.03948	BNIP3L/FIS1/PINK1/FBXO7/FUNDC2	5
darkred	GO:0061726	mitochondrion disassembly	5/164	84/17653	0.00111287	0.0456743	0.03948	BNIP3L/FIS1/PINK1/FBXO7/FUNDC2	5
darkred	GO:0071453	cellular response to oxygen levels	8/164	222/17653	0.0011243	0.0456743	0.03948	BNIP3L/UBB/UBA52/PSME4/PSMF1/PINK1/UBE2D3/RGCC	8
darkred	GO:0000082	G1/S transition of mitotic cell cycle	9/164	276/17653	0.00112658	0.0456743	0.03948	TFDP1/UBB/UBA52/ADAM17/GSPT1/FBXO7/CDC34/RGCC/CTDSP2	9
darkred	GO:0009896	positive regulation of catabolic process	11/164	393/17653	0.00113766	0.0456743	0.03948	SNCA/BNIP3L/BAG6/RILP/OAZ1/PINK1/FBXO7/CLU/DDB1/SESN3/PNPLA2	11
darkred	GO:0044106	cellular amine metabolic process	6/164	126/17653	0.00115403	0.0456743	0.03948	SNCA/PSME4/PSMF1/ODC1/OAZ1/GDE1	6
darkred	GO:1903747	regulation of establishment of protein localization to mitochondrion	6/164	126/17653	0.00115403	0.0456743	0.03948	TFDP1/BNIP3L/CYB5R1/PPP3R1/PINK1/UBE2D3	6
darkred	GO:1903533	regulation of protein targeting	6/164	127/17653	0.0012021	0.0466751	0.040345	BNIP3L/CYB5R1/FIS1/STOM/PINK1/UBE2D3	6
darkred	GO:0000715	nucleotide-excision repair, DNA damage recognition	3/164	23/17653	0.00121617	0.0466751	0.040345	UBB/UBA52/DDB1	3
darkred	GO:2000045	regulation of G1/S transition of mitotic cell cycle	7/164	175/17653	0.00125971	0.0476244	0.0411656	TFDP1/UBB/UBA52/ADAM17/FBXO7/RGCC/CTDSP2	7

## Sheet: lightyellow
Cluster	ID	Description	GeneRatio	BgRatio	pvalue	p.adjust	qvalue	geneID	Count
lightyellow	GO:0032200	telomere organization	11/199	172/17653	4.11409e-06	0.0115236	0.0105277	HSP90AB1/HIST1H3D/HIST1H3B/SMG1/ATM/PRKCQ/HIST1H3F/ATR/PARP1/HNRNPU/HNRNPA2B1	11
lightyellow	GO:0042101	T cell receptor complex	4/206	19/18698	4.87146e-05	0.0187551	0.016204	CD8A/TRAT1/CD8B/CD3E	4
lightyellow	GO:0010833	telomere maintenance via telomere lengthening	7/199	79/17653	3.03858e-05	0.0283702	0.0259186	HSP90AB1/ATM/PRKCQ/ATR/PARP1/HNRNPU/HNRNPA2B1	7
lightyellow	GO:0032204	regulation of telomere maintenance	7/199	79/17653	3.03858e-05	0.0283702	0.0259186	SMG1/ATM/PRKCQ/ATR/PARP1/HNRNPU/HNRNPA2B1	7
lightyellow	GO:0000790	nuclear chromatin	13/206	354/18698	0.000159048	0.0306167	0.0264522	DDX11/HIST1H3D/MAX/HIST1H3B/HIST2H2AC/ZEB2/UHRF2/ASXL2/HIST1H3F/SMARCC1/CSNK2A1/MPHOSPH8/NCOR1	13
lightyellow	GO:0033044	regulation of chromosome organization	13/199	311/17653	5.41117e-05	0.0321684	0.0293885	DDX11/SMG1/BUB3/KMT2E/ATM/UHRF2/PRKCQ/ATR/TPR/PARP1/CAMK2D/HNRNPU/HNRNPA2B1	13
lightyellow	GO:1904356	regulation of telomere maintenance via telomere lengthening	6/199	60/17653	5.7423e-05	0.0321684	0.0293885	ATM/PRKCQ/ATR/PARP1/HNRNPU/HNRNPA2B1	6
lightyellow	GO:0005925	focal adhesion	13/206	393/18698	0.000435413	0.0405168	0.0350057	PDCD6IP/CAT/PTPRC/STX16/ITGA4/RPLP2/ITGA6/YWHAQ/ANXA6/TPM4/SH3KBP1/PABPC1/RPS2	13
lightyellow	GO:0005924	cell-substrate adherens junction	13/206	396/18698	0.000467756	0.0405168	0.0350057	PDCD6IP/CAT/PTPRC/STX16/ITGA4/RPLP2/ITGA6/YWHAQ/ANXA6/TPM4/SH3KBP1/PABPC1/RPS2	13
lightyellow	GO:0030055	cell-substrate junction	13/206	401/18698	0.000526193	0.0405168	0.0350057	PDCD6IP/CAT/PTPRC/STX16/ITGA4/RPLP2/ITGA6/YWHAQ/ANXA6/TPM4/SH3KBP1/PABPC1/RPS2	13

## Sheet: tan
Cluster	ID	Description	GeneRatio	BgRatio	pvalue	p.adjust	qvalue	geneID	Count
tan	GO:0044391	ribosomal subunit	59/523	193/18698	7.34589e-45	3.71702e-42	3.02342e-42	MRPL18/RPLP1/MRPS15/RPL10L/RPLP0/MRPL16/RPS8/MRPL23/RPS14/RPL18A/SNU13/EIF2D/RPS9/RPS6/RPL6/COA1/RPS28/RPSA/MRPL46/RPS19/RPL38/MRPL20/RPL19/RPS16/RPL13/RPL37A/RPL14/RPL29/RPS4X/RPL23A/RPS2/RPS3/MRPL53/MRPL49/RPL12/MRPS16/MRPL43/RPL10/RPL28/RPS18/MRPL34/RPL22/RPL35/RPL8/RPL10A/RPS10/RPL13A/MRPL36/RPL5/MRPL24/RPL18/RBM3/RPL3/RACK1/RPL7A/MRPL12/RPL15/MRPS27/RPL4	59
tan	GO:0005840	ribosome	62/523	242/18698	5.54198e-42	1.40212e-39	1.14048e-39	METTL17/MRPL18/RPLP1/MRPS15/RPL10L/RPLP0/MRPL16/RPS8/MRPL23/RPS14/RPL18A/SNU13/EIF2D/RPS9/RPS6/RPL6/COA1/RPS28/RPSA/MRPL46/RPS19/RPL38/MRPL20/RPL19/RPS16/RPL13/RPL37A/RPL14/RPL29/RPS4X/RPL23A/RPS2/RPS3/MRPL53/MRPL49/RPL12/MRPS16/MRPL43/RPL10/RPL28/RPS18/MRPL34/RPL22/RPL35/RPL8/RPL10A/RPS10/EIF2AK4/RPL13A/MRPL36/EEF2/RPL5/MRPL24/RPL18/RBM3/RPL3/RACK1/RPL7A/MRPL12/RPL15/MRPS27/RPL4	62
tan	GO:0003735	structural constituent of ribosome	53/508	162/17548	2.24977e-41	1.47135e-38	1.36407e-38	MRPL18/RPLP1/MRPS15/RPL10L/RPLP0/MRPL16/RPS8/MRPL23/RPS14/RPL18A/RPS9/RPS6/RPL6/COA1/RPS28/RPSA/MRPL46/RPS19/RPL38/MRPL20/RPL19/RPS16/RPL13/RPL37A/RPL14/RPL29/RPS4X/RPL23A/RPS2/RPS3/MRPL49/RPL12/MRPS16/MRPL43/RPL10/RPL28/RPS18/MRPL34/RPL22/RPL35/RPL8/RPL10A/RPS10/RPL13A/MRPL36/RPL5/MRPL24/RPL18/RPL3/RPL7A/MRPL12/RPL15/RPL4	53
tan	GO:0022626	cytosolic ribosome	44/523	123/18698	5.04924e-37	8.51639e-35	6.92721e-35	RPLP1/RPL10L/RPLP0/RPS8/RPS14/RPL18A/SNU13/EIF2D/RPS9/RPS6/RPL6/COA1/RPS28/RPSA/RPS19/RPL38/RPL19/RPS16/RPL13/RPL37A/RPL14/RPL29/RPS4X/RPL23A/RPS2/RPS3/RPL12/RPL10/RPL28/RPS18/RPL22/RPL35/RPL8/RPL10A/RPS10/EIF2AK4/RPL13A/RPL5/RPL18/RPL3/RACK1/RPL7A/RPL15/RPL4	44
tan	GO:0045047	protein targeting to ER	41/504	101/17653	6.69e-37	2.40706e-33	2.28516e-33	RPLP1/RPLP0/RPS8/RPS14/RPL18A/RPS9/RPS6/RPL6/RPS28/RPSA/RPS19/RPL38/RPL19/RPS16/RPL13/RPL37A/RPL14/RPL29/RPS4X/RPL23A/RPS2/CHMP4A/RPS3/SEC61B/RPL12/RPL10/RPL28/RPS18/SPCS1/RPL22/RPL35/RPL8/RPL10A/RPS10/RPL13A/RPL5/RPL18/RPL3/RPL7A/RPL15/RPL4	41
tan	GO:0006613	cotranslational protein targeting to membrane	40/504	96/17653	1.41969e-36	2.55402e-33	2.42468e-33	RPLP1/RPLP0/RPS8/RPS14/RPL18A/RPS9/RPS6/RPL6/RPS28/RPSA/RPS19/RPL38/SSR1/RPL19/RPS16/RPL13/RPL37A/RPL14/RPL29/RPS4X/RPL23A/RPS2/RPS3/SEC61B/RPL12/RPL10/RPL28/RPS18/RPL22/RPL35/RPL8/RPL10A/RPS10/RPL13A/RPL5/RPL18/RPL3/RPL7A/RPL15/RPL4	40
tan	GO:0006614	SRP-dependent cotranslational protein targeting to membrane	39/504	91/17653	2.86385e-36	3.43471e-33	3.26077e-33	RPLP1/RPLP0/RPS8/RPS14/RPL18A/RPS9/RPS6/RPL6/RPS28/RPSA/RPS19/RPL38/RPL19/RPS16/RPL13/RPL37A/RPL14/RPL29/RPS4X/RPL23A/RPS2/RPS3/SEC61B/RPL12/RPL10/RPL28/RPS18/RPL22/RPL35/RPL8/RPL10A/RPS10/RPL13A/RPL5/RPL18/RPL3/RPL7A/RPL15/RPL4	39
tan	GO:0072599	establishment of protein localization to endoplasmic reticulum	41/504	105/17653	4.53491e-36	4.07915e-33	3.87257e-33	RPLP1/RPLP0/RPS8/RPS14/RPL18A/RPS9/RPS6/RPL6/RPS28/RPSA/RPS19/RPL38/RPL19/RPS16/RPL13/RPL37A/RPL14/RPL29/RPS4X/RPL23A/RPS2/CHMP4A/RPS3/SEC61B/RPL12/RPL10/RPL28/RPS18/SPCS1/RPL22/RPL35/RPL8/RPL10A/RPS10/RPL13A/RPL5/RPL18/RPL3/RPL7A/RPL15/RPL4	41
tan	GO:0006413	translational initiation	51/504	195/17653	1.01127e-34	7.27708e-32	6.90856e-32	EIF2B5/RPLP1/EIF3K/RPLP0/RPS8/RPS14/RPL18A/EIF2D/RPS9/RPS6/RPL6/UHMK1/EIF3L/RPS28/RPSA/RPS19/RPL38/RPL19/RPS16/RPL13/RPL37A/RPL14/EIF4E2/RPL29/RPS4X/RPL23A/RPS2/NPM1/RPS3/EIF4H/EIF3I/RPL12/RPL10/RPL28/RPS18/RPL22/RPL35/RPL8/RPL10A/RPS10/EIF2AK4/RPL13A/RPL5/EIF2B4/RPL18/RPL3/EIF3G/RPL7A/RPL15/EIF3D/RPL4	51
tan	GO:0015934	large ribosomal subunit	41/523	121/18698	1.8839e-33	2.38313e-31	1.93843e-31	MRPL18/RPLP1/RPL10L/RPLP0/MRPL16/MRPL23/RPL18A/SNU13/RPL6/COA1/MRPL46/RPL38/MRPL20/RPL19/RPL13/RPL37A/RPL14/RPL29/RPL23A/MRPL53/MRPL49/RPL12/MRPL43/RPL10/RPL28/MRPL34/RPL22/RPL35/RPL8/RPL10A/RPL13A/MRPL36/RPL5/MRPL24/RPL18/RBM3/RPL3/RPL7A/MRPL12/RPL15/RPL4	41
tan	GO:0044445	cytosolic part	55/523	255/18698	4.69459e-33	4.75092e-31	3.86439e-31	RPLP1/RPL10L/CCT7/RPLP0/RPS8/RPS14/RPL18A/SNU13/EIF2D/RPS9/RPS6/RPL6/COA1/RPS28/RPSA/RPS19/RPL38/GSDMD/RPL19/RPS16/RPL13/RPL37A/RPL14/RPL29/HSPA8/RPS4X/RPL23A/RPS2/RPS3/DTNBP1/RPL12/CCT3/CCT4/RPL10/BORCS6/RPL28/RPS18/RPL22/RPL35/RPL8/RPL10A/RPS10/EIF2AK4/RPL13A/RPL5/IKBKB/CIAO2B/CCT8/RPL18/RPL3/SNAPIN/RACK1/RPL7A/RPL15/RPL4	55
tan	GO:0022613	ribonucleoprotein complex biogenesis	74/504	475/17653	9.56664e-34	5.73679e-31	5.44627e-31	ZNHIT6/SENP3/RPLP1/RPL10L/RPLP0/RPS8/RPS14/SNRPF/TXNL4A/RPL18A/DDX23/SNU13/CIRBP/EIF2D/RPS9/RPS6/RPP38/RPL6/PRPF3/NOB1/RRP1B/EXOSC1/RPS28/RPSA/RPS19/RPL38/ATXN2L/MRPL20/SETD4/RPL19/RPS16/EMG1/RPL13/RPL37A/RPL14/RPL29/RPS4X/TRMT112/RIOK1/RPL23A/RPS2/NPM1/RPS3/LYAR/EXOSC7/RBMX/EIF4H/DKC1/RPL12/USP39/NSUN5/RPL10/RPL28/RPS18/RPL22/RPL35/RPL8/RPL10A/RPS10/RPL13A/MRPL36/RPL5/GNL1/NOP53/NOL11/RPL18/RPL3…	74
tan	GO:0042254	ribosome biogenesis	63/504	335/17653	1.25087e-33	6.42946e-31	6.10386e-31	ZNHIT6/SENP3/RPLP1/RPL10L/RPLP0/RPS8/RPS14/RPL18A/SNU13/RPS9/RPS6/RPP38/RPL6/NOB1/RRP1B/EXOSC1/RPS28/RPSA/RPS19/RPL38/MRPL20/SETD4/RPL19/RPS16/EMG1/RPL13/RPL37A/RPL14/RPL29/RPS4X/TRMT112/RIOK1/RPL23A/RPS2/NPM1/RPS3/LYAR/EXOSC7/DKC1/RPL12/NSUN5/RPL10/RPL28/RPS18/RPL22/RPL35/RPL8/RPL10A/RPS10/RPL13A/MRPL36/RPL5/GNL1/NOP53/NOL11/RPL18/RPL3/WDR37/GAR1/RPL7A/RPL15/GTF3A/RPL4	63
tan	GO:0070972	protein localization to endoplasmic reticulum	42/504	131/17653	8.937e-33	4.01942e-30	3.81586e-30	RPLP1/RPLP0/RPS8/RPS14/RPL18A/RPS9/RPS6/RPL6/RER1/RPS28/RPSA/RPS19/RPL38/RPL19/RPS16/RPL13/RPL37A/RPL14/RPL29/RPS4X/RPL23A/RPS2/CHMP4A/RPS3/SEC61B/RPL12/RPL10/RPL28/RPS18/SPCS1/RPL22/RPL35/RPL8/RPL10A/RPS10/RPL13A/RPL5/RPL18/RPL3/RPL7A/RPL15/RPL4	42
tan	GO:0016072	rRNA metabolic process	59/504	299/17653	1.01161e-32	4.04419e-30	3.83938e-30	SENP3/RPLP1/RPLP0/GTF3C2/RPS8/RPS14/RPL18A/SNU13/RPS9/RPS6/RPP38/RPL6/NCL/NOB1/RRP1B/EXOSC1/RPS28/RPSA/RPS19/RPL38/RPL19/RPS16/EMG1/RPL13/RPL37A/RPL14/RPL29/RPS4X/TRMT112/RIOK1/RPL23A/RPS2/RPS3/LYAR/EXOSC7/DKC1/RPL12/NSUN5/RPL10/RPL28/RPS18/RPL22/RPL35/RPL8/RPL10A/RPS10/RPL13A/RPL5/NOP53/NOL11/RPL18/RPL3/WDR37/GAR1/RPL7A/RPL15/GTF3A/GTF3C3/RPL4	59
tan	GO:0019080	viral gene expression	47/504	190/17653	7.28135e-31	2.61983e-28	2.48716e-28	RPLP1/RPLP0/RPS8/RPS14/RPL18A/EIF2D/RPS9/RPS6/TAF11/RPL6/EIF3L/RRP1B/RPS28/RPSA/RPS19/RPL38/POLR2F/RPL19/RPS16/RPL13/RPL37A/RPL14/RPL29/RPS4X/RPL23A/RPS2/RPS3/RPL12/RPL10/RPL28/RPS18/RPL22/RPL35/RPL8/RPL10A/RPS10/EIF2AK4/RPL13A/RPL5/CCL4/RPL18/RPL3/EIF3G/RPL7A/RPL15/EIF3D/RPL4	47
tan	GO:0000184	nuclear-transcribed mRNA catabolic process, nonsense-mediated decay	39/504	120/17653	9.23724e-31	2.91922e-28	2.77139e-28	RPLP1/RPLP0/RPS8/RPS14/RPL18A/RPS9/RPS6/RPL6/RPS28/RPSA/RPS19/RPL38/RPL19/RPS16/RPL13/RPL37A/RPL14/RPL29/RPS4X/RPL23A/RPS2/RPS3/RNPS1/RPL12/RPL10/RPL28/RPS18/RPL22/RPL35/RPL8/RPL10A/RPS10/RPL13A/RPL5/RPL18/RPL3/RPL7A/RPL15/RPL4	39
tan	GO:0006364	rRNA processing	54/504	265/17653	9.73615e-31	2.91922e-28	2.77139e-28	SENP3/RPLP1/RPLP0/RPS8/RPS14/RPL18A/SNU13/RPS9/RPS6/RPP38/RPL6/NOB1/RRP1B/EXOSC1/RPS28/RPSA/RPS19/RPL38/RPL19/RPS16/EMG1/RPL13/RPL37A/RPL14/RPL29/RPS4X/TRMT112/RIOK1/RPL23A/RPS2/RPS3/LYAR/EXOSC7/DKC1/RPL12/NSUN5/RPL10/RPL28/RPS18/RPL22/RPL35/RPL8/RPL10A/RPS10/RPL13A/RPL5/NOL11/RPL18/RPL3/WDR37/GAR1/RPL7A/RPL15/RPL4	54
tan	GO:0006612	protein targeting to membrane	45/504	182/17653	1.40903e-29	3.89975e-27	3.70226e-27	RPLP1/MIEF1/RPLP0/RPS8/RPS14/RPL18A/RPS9/RPS6/RPL6/RPS28/RPSA/ZDHHC11/RPS19/RPL38/ITGB1BP1/SSR1/RPL19/RPS16/RPL13/RPL37A/RPL14/RPL29/RPS4X/RPL23A/RPS2/CHMP4A/RPS3/SEC61B/RPL12/RPL10/RPL28/RPS18/RPL22/RPL35/RPL8/RPL10A/RPS10/RPL13A/RPL5/RPL18/RPL3/RPL7A/RPL15/CIB1/RPL4	45
tan	GO:0034470	ncRNA processing	64/504	425/17653	2.45779e-28	6.31652e-26	5.99664e-26	SENP3/RPLP1/RPLP0/RPS8/RPS14/RPL18A/SNU13/ELP6/RPS9/RPS6/RPP38/RPL6/NOB1/RRP1B/EXOSC1/RPS28/RPSA/HSD17B10/RPS19/RPL38/RPL19/RPS16/EMG1/RPL13/RPL37A/RPL14/RPL29/RPS4X/TRMT112/RIOK1/RPL23A/RPS2/RPS3/LYAR/EXOSC7/DKC1/RPL12/NSUN5/RPL10/RPL28/RPS18/RPL22/RPL35/RPL8/RPL10A/RPS10/RPL13A/RPUSD3/RPL5/INTS10/PUS1/NOL11/RPL18/DUS1L/RPL3/WDR37/SEPHS2/GAR1/RPL7A/RPL15/CPSF4/FARS2/RPL4/TP53RK	64
tan	GO:0019083	viral transcription	42/504	176/17653	5.34913e-27	1.28308e-24	1.2181e-24	RPLP1/RPLP0/RPS8/RPS14/RPL18A/RPS9/RPS6/TAF11/RPL6/RRP1B/RPS28/RPSA/RPS19/RPL38/POLR2F/RPL19/RPS16/RPL13/RPL37A/RPL14/RPL29/RPS4X/RPL23A/RPS2/RPS3/RPL12/RPL10/RPL28/RPS18/RPL22/RPL35/RPL8/RPL10A/RPS10/RPL13A/RPL5/CCL4/RPL18/RPL3/RPL7A/RPL15/RPL4	42
tan	GO:0022625	cytosolic large ribosomal subunit	28/523	68/18698	5.5595e-26	4.68851e-24	3.81362e-24	RPLP1/RPL10L/RPLP0/RPL18A/SNU13/RPL6/COA1/RPL38/RPL19/RPL13/RPL37A/RPL14/RPL29/RPL23A/RPL12/RPL10/RPL28/RPL22/RPL35/RPL8/RPL10A/RPL13A/RPL5/RPL18/RPL3/RPL7A/RPL15/RPL4	28
tan	GO:0000956	nuclear-transcribed mRNA catabolic process	43/504	209/17653	8.02772e-25	1.80523e-22	1.71381e-22	LSM2/RPLP1/RPLP0/RPS8/RPS14/RPL18A/RPS9/RPS6/RPL6/EXOSC1/RPS28/RPSA/RPS19/RPL38/RPL19/RPS16/RPL13/RPL37A/RPL14/RPL29/RPS4X/RPL23A/RPS2/RPS3/RNPS1/EXOSC7/WDR61/RPL12/RPL10/RPL28/RPS18/RPL22/RPL35/RPL8/RPL10A/RPS10/RPL13A/RPL5/RPL18/RPL3/RPL7A/RPL15/RPL4	43
tan	GO:0090150	establishment of protein localization to membrane	50/504	296/17653	1.38693e-24	2.9354e-22	2.78675e-22	RPLP1/YWHAQ/MIEF1/RPLP0/RPS8/RPS14/RPL18A/RPS9/RPS6/RPL6/RPS28/RPSA/ZDHHC11/RPS19/RPL38/ITGB1BP1/SSR1/RPL19/RPS16/RPL13/RPL37A/RPL14/RPL29/DYNLL1/RPS4X/MAIP1/RPL23A/RPS2/CHMP4A/RPS3/SEC61B/RPL12/RPL10/RPL28/RPS18/RPL22/RPL35/RPL8/RPL10A/RPS10/RPL13A/RPL5/RPL18/RPL3/RACK1/VAMP5/RPL7A/RPL15/CIB1/RPL4	50
tan	GO:0006402	mRNA catabolic process	53/504	351/17653	1.27121e-23	2.541e-21	2.41232e-21	LSM2/RPLP1/PSMA5/RPLP0/RPS8/RPS14/PSMB8/RPL18A/CIRBP/HNRNPD/RPS9/RPS6/RPL6/EXOSC1/RPS28/RPSA/RPS19/RPL38/RPL19/RPS16/RPL13/RPL37A/PSMB6/RPL14/RPL29/HSPA8/RPS4X/RPL23A/RPS2/NPM1/RPS3/PSMB5/RNPS1/EXOSC7/WDR61/RPL12/RPL10/RPL28/RPS18/RPL22/RPL35/RPL8/RPL10A/RPS10/SERBP1/RPL13A/RPL5/PSMA7/RPL18/RPL3/RPL7A/RPL15/RPL4	53
tan	GO:0006401	RNA catabolic process	55/504	384/17653	2.40883e-23	4.56157e-21	4.33056e-21	LSM2/RPLP1/PSMA5/RPLP0/RPS8/RPS14/PSMB8/RPL18A/CIRBP/HNRNPD/RPS9/RPS6/RPL6/EXOSC1/RPS28/RPSA/RPS19/RPL38/RPL19/RPS16/RPL13/RPL37A/PSMB6/RPL14/RPL29/HSPA8/RPS4X/RPL23A/RPS2/NPM1/RPS3/PSMB5/RNPS1/ZPR1/EXOSC7/WDR61/DKC1/RPL12/RPL10/RPL28/RPS18/RPL22/RPL35/RPL8/RPL10A/RPS10/SERBP1/RPL13A/RPL5/PSMA7/RPL18/RPL3/RPL7A/RPL15/RPL4	55
tan	GO:0006605	protein targeting	52/504	419/17653	2.83864e-19	5.10672e-17	4.8481e-17	SYNGR1/RPLP1/YWHAQ/MIEF1/RPLP0/RPS8/RPS14/RPL18A/RPS9/RPS6/RPL6/RPS28/RPSA/ZDHHC11/RPS19/RPL38/ITGB1BP1/SSR1/RPL19/RPS16/RPL13/RPL37A/RPL14/RPL29/TIMM44/HSPA8/RPS4X/RPL23A/RPS2/CHMP4A/RPS3/SEC61B/RPL12/AP4B1/STARD7/RPL10/RPL28/RPS18/SPCS1/RPL22/RPL35/RPL8/RPL10A/RPS10/RPL13A/RPL5/RPL18/RPL3/RPL7A/RPL15/CIB1/RPL4	52
tan	GO:0005759	mitochondrial matrix	47/523	453/18698	8.83811e-15	6.38869e-13	5.19654e-13	MRPL18/MRPS15/MRPL16/MPG/MRPL23/NUDT2/DNAJA3/VDAC2/VDAC1/ACSS1/SDHAF2/GLRX2/SLC25A5/MRPL46/HSD17B10/MRPL20/DGLUCY/MDH2/ATP5F1A/TIMM44/BCKDHB/MAIP1/GLS/RPS3/MRPL53/FXN/HMGCL/MRPL49/MRPS16/MRPL43/LONP1/MRPL34/YARS2/FLAD1/GFM1/RPUSD3/MRPL36/TXN2/PARK7/HARS2/ETFA/MRPL24/IDH3A/PUS1/MRPL12/MRPS27/FARS2	47
tan	GO:0019843	rRNA binding	19/508	59/17548	2.02377e-15	6.61774e-13	6.13523e-13	MRPL18/MRPL16/RPS14/CIRBP/RPS9/MRPL20/EMG1/RPS4X/RPL23A/RPS3/RPL12/RPS18/RPL8/EEF2/RPL5/NOP53/RPL3/MRPS27/GTF3A	19
tan	GO:0022618	ribonucleoprotein complex assembly	30/504	211/17653	3.83312e-13	6.56741e-11	6.23483e-11	ZNHIT6/RPL10L/RPS14/SNRPF/TXNL4A/DDX23/SNU13/CIRBP/EIF2D/RPL6/PRPF3/RPS28/RPSA/RPS19/RPL38/ATXN2L/MRPL20/RPL23A/NPM1/RBMX/EIF4H/RPL12/USP39/RPL10/RPS10/RPL13A/RPL5/NOP53/RPL3/EIF3D	30
tan	GO:0015935	small ribosomal subunit	18/523	73/18698	1.08839e-12	6.88407e-11	5.59948e-11	MRPS15/RPS8/RPS14/EIF2D/RPS9/RPS6/RPS28/RPSA/RPS19/RPS16/RPS4X/RPS2/RPS3/MRPS16/RPS18/RPS10/RACK1/MRPS27	18
tan	GO:0002181	cytoplasmic translation	20/504	88/17653	4.53688e-13	7.41986e-11	7.0441e-11	RPLP1/RPLP0/RPL18A/EIF2D/RPL6/RPS28/RPL38/RPL19/RPL29/RPS3/EIF4H/RPL22/RPL8/RPL10A/RPL13A/EEF2/RPL18/RPL15/EIF3D/RPL4	20
tan	GO:0022627	cytosolic small ribosomal subunit	15/523	48/18698	1.92317e-12	1.08125e-10	8.79485e-11	RPS8/RPS14/EIF2D/RPS9/RPS6/RPS28/RPSA/RPS19/RPS16/RPS4X/RPS2/RPS3/RPS18/RPS10/RACK1	15
tan	GO:0042273	ribosomal large subunit biogenesis	18/504	71/17653	9.02067e-13	1.41115e-10	1.33968e-10	RPL10L/SNU13/RPL6/RPL38/MRPL20/RPL14/RPL23A/NPM1/RPL12/RPL10/RPL35/RPL10A/RPL5/NOP53/RPL3/WDR37/RPL7A/GTF3A	18
tan	GO:0071826	ribonucleoprotein complex subunit organization	30/504	223/17653	1.65675e-12	2.48375e-10	2.35796e-10	ZNHIT6/RPL10L/RPS14/SNRPF/TXNL4A/DDX23/SNU13/CIRBP/EIF2D/RPL6/PRPF3/RPS28/RPSA/RPS19/RPL38/ATXN2L/MRPL20/RPL23A/NPM1/RBMX/EIF4H/RPL12/USP39/RPL10/RPS10/RPL13A/RPL5/NOP53/RPL3/EIF3D	30
tan	GO:0042255	ribosome assembly	16/504	61/17653	9.55338e-12	1.37492e-09	1.30529e-09	RPL10L/RPS14/RPL6/RPS28/RPSA/RPS19/RPL38/MRPL20/RPL23A/NPM1/RPL12/RPL10/RPS10/RPL5/NOP53/RPL3	16
tan	GO:0098798	mitochondrial protein complex	30/523	263/18698	7.00277e-11	3.5434e-09	2.88219e-09	MRPL18/NDUFS6/MRPS15/MRPL16/MRPL23/VDAC1/NDUFA12/MRPL46/HSD17B10/MRPL20/ATP5F1A/BCKDHB/MRPL53/NDUFA11/NDUFC2/MRPL49/NDUFV2/MRPS16/MRPL43/MRPL34/MICOS10/UQCR10/MRPL36/MCUB/PARK7/MRPL24/ATP5MC1/COX4I1/MRPL12/MRPS27	30
tan	GO:0005844	polysome	16/523	74/18698	1.68393e-10	7.74607e-09	6.30063e-09	RPL10L/RPL18A/RPS6/RPL6/RPS28/RPL38/RPL19/RPS4X/RPS3/EIF4H/RPL8/RPL10A/EIF2AK4/EEF2/RPL18/RPL7A	16
tan	GO:0005925	focal adhesion	36/523	393/18698	4.5873e-10	1.93431e-08	1.57336e-08	PPIA/RPLP1/YWHAQ/RPLP0/RPS8/RPS14/RPS9/RPL6/RPS19/RPL38/RPL19/RPS16/RPL37A/HSPA8/RPS4X/RPS2/NPM1/RPS3/CD81/RPL12/LPXN/RPS18/RPL22/ACTB/RPL8/ARHGEF7/RPL10A/RPS10/RPL13A/RPL5/RPL18/RPL3/RPL7A/DPP4/MPRIP/RPL4	36
tan	GO:0005924	cell-substrate adherens junction	36/523	396/18698	5.65236e-10	2.20007e-08	1.78953e-08	PPIA/RPLP1/YWHAQ/RPLP0/RPS8/RPS14/RPS9/RPL6/RPS19/RPL38/RPL19/RPS16/RPL37A/HSPA8/RPS4X/RPS2/NPM1/RPS3/CD81/RPL12/LPXN/RPS18/RPL22/ACTB/RPL8/ARHGEF7/RPL10A/RPS10/RPL13A/RPL5/RPL18/RPL3/RPL7A/DPP4/MPRIP/RPL4	36
tan	GO:0030055	cell-substrate junction	36/523	401/18698	7.96467e-10	2.87866e-08	2.34149e-08	PPIA/RPLP1/YWHAQ/RPLP0/RPS8/RPS14/RPS9/RPL6/RPS19/RPL38/RPL19/RPS16/RPL37A/HSPA8/RPS4X/RPS2/NPM1/RPS3/CD81/RPL12/LPXN/RPS18/RPL22/ACTB/RPL8/ARHGEF7/RPL10A/RPS10/RPL13A/RPL5/RPL18/RPL3/RPL7A/DPP4/MPRIP/RPL4	36
tan	GO:0006414	translational elongation	21/504	134/17653	2.14961e-10	2.97473e-08	2.82409e-08	MRPL18/RPLP1/MRPS15/MRPL16/MRPL23/EEF1G/MRPL46/MRPL20/MRPL53/MRPL49/MRPS16/MRPL43/MRPL34/GFM1/MRPL36/EEF2/MRPL24/RACK1/MRPL12/MRPS27/EEF1D	21
tan	GO:0042788	polysomal ribosome	10/523	30/18698	4.88805e-09	1.6489e-07	1.34121e-07	RPL18A/RPL6/RPS28/RPL38/RPL19/RPL8/RPL10A/EEF2/RPL18/RPL7A	10
tan	GO:0042274	ribosomal small subunit biogenesis	15/504	72/17653	1.43648e-09	1.91424e-07	1.8173e-07	RPS8/RPS14/SNU13/RPS6/NOB1/RPS28/RPSA/RPS19/RPL38/RPS16/EMG1/RIOK1/NPM1/RPS10/NOL11	15
tan	GO:0070125	mitochondrial translational elongation	16/504	87/17653	2.81514e-09	3.61746e-07	3.43426e-07	MRPL18/MRPS15/MRPL16/MRPL23/MRPL46/MRPL20/MRPL53/MRPL49/MRPS16/MRPL43/MRPL34/GFM1/MRPL36/MRPL24/MRPL12/MRPS27	16
tan	GO:0000313	organellar ribosome	15/523	85/18698	1.22059e-08	3.63305e-07	2.95511e-07	MRPL18/MRPS15/MRPL16/MRPL23/MRPL46/MRPL20/MRPL53/MRPL49/MRPS16/MRPL43/MRPL34/MRPL36/MRPL24/MRPL12/MRPS27	15
tan	GO:0005761	mitochondrial ribosome	15/523	85/18698	1.22059e-08	3.63305e-07	2.95511e-07	MRPL18/MRPS15/MRPL16/MRPL23/MRPL46/MRPL20/MRPL53/MRPL49/MRPS16/MRPL43/MRPL34/MRPL36/MRPL24/MRPL12/MRPS27	15
tan	GO:0000315	organellar large ribosomal subunit	12/523	52/18698	1.50764e-08	4.01508e-07	3.26585e-07	MRPL18/MRPL16/MRPL23/MRPL46/MRPL20/MRPL53/MRPL49/MRPL43/MRPL34/MRPL36/MRPL24/MRPL12	12
tan	GO:0005762	mitochondrial large ribosomal subunit	12/523	52/18698	1.50764e-08	4.01508e-07	3.26585e-07	MRPL18/MRPL16/MRPL23/MRPL46/MRPL20/MRPL53/MRPL49/MRPL43/MRPL34/MRPL36/MRPL24/MRPL12	12
tan	GO:0140053	mitochondrial gene expression	21/504	155/17653	3.31767e-09	4.1162e-07	3.90774e-07	MRPL18/MRPS15/MRPL16/MRPL23/MRPL46/HSD17B10/MRPL20/MRPL53/MRPL49/COA3/MRPS16/MRPL43/MRPL34/YARS2/GFM1/MRPL36/HARS2/MRPL24/PUS1/MRPL12/MRPS27	21
tan	GO:0032543	mitochondrial translation	19/504	130/17653	5.20143e-09	6.23825e-07	5.92233e-07	MRPL18/MRPS15/MRPL16/MRPL23/MRPL46/MRPL20/MRPL53/MRPL49/COA3/MRPS16/MRPL43/MRPL34/YARS2/GFM1/MRPL36/HARS2/MRPL24/MRPL12/MRPS27	19
tan	GO:0000027	ribosomal large subunit assembly	10/504	30/17653	5.92093e-09	6.8721e-07	6.52408e-07	RPL10L/RPL6/RPL38/MRPL20/RPL23A/RPL12/RPL10/RPL5/NOP53/RPL3	10
tan	GO:0006399	tRNA metabolic process	22/504	188/17653	2.20293e-08	2.47692e-06	2.35149e-06	GTF3C2/ELP6/RPP38/HSD17B10/IARS/DALRD3/TRMT112/LRRC47/EXOSC7/EPRS/YARS2/RPUSD3/HARS2/AIMP2/PUS1/DUS1L/SEPHS2/CPSF4/FARS2/DARS/GTF3C3/TP53RK	22
tan	GO:0070126	mitochondrial translational termination	15/504	89/17653	3.03778e-08	3.21622e-06	3.05334e-06	MRPL18/MRPS15/MRPL16/MRPL23/MRPL46/MRPL20/MRPL53/MRPL49/MRPS16/MRPL43/MRPL34/MRPL36/MRPL24/MRPL12/MRPS27	15
tan	GO:0006415	translational termination	16/504	102/17653	3.03923e-08	3.21622e-06	3.05334e-06	MRPL18/MRPS15/MRPL16/MRPL23/MRPL46/MRPL20/TRMT112/MRPL53/MRPL49/MRPS16/MRPL43/MRPL34/MRPL36/MRPL24/MRPL12/MRPS27	16
tan	GO:1990173	protein localization to nucleoplasm	6/504	11/17653	2.15075e-07	2.21097e-05	2.099e-05	CCT7/CCT3/CCT4/TBRG1/NOP53/CCT8	6
tan	GO:0030490	maturation of SSU-rRNA	11/504	53/17653	2.37412e-07	2.3728e-05	2.25264e-05	RPS8/RPS14/SNU13/NOB1/RPS28/RPSA/RPS19/RPS16/EMG1/RIOK1/NOL11	11
tan	GO:0050852	T cell receptor signaling pathway	21/504	200/17653	2.96856e-07	2.88673e-05	2.74054e-05	HRAS/EIF2B5/PSMA5/PSMB8/HLA-DRB1/BTN3A1/DUSP22/PIK3R1/HLA-DPB1/PSMB6/BTN3A2/ITK/RPS3/PSMB5/HLA-DRA/CD247/HLA-DQB1/LCK/IKBKB/PSMA7/EIF2B4	21
tan	GO:0008097	5S rRNA binding	6/508	11/17548	2.33391e-07	4.14387e-05	3.84173e-05	MRPL18/EEF2/RPL5/NOP53/RPL3/GTF3A	6
tan	GO:0008135	translation factor activity, RNA binding	14/508	89/17548	2.53447e-07	4.14387e-05	3.84173e-05	EIF2B5/EIF3K/EIF2D/EIF3L/EEF1G/EIF4E2/EIF4H/EIF3I/GFM1/EEF2/EIF2B4/EIF3G/EIF3D/EEF1D	14
tan	GO:0050851	antigen receptor-mediated signaling pathway	25/504	282/17653	5.84773e-07	5.53687e-05	5.25647e-05	HRAS/EIF2B5/PSMA5/PSMB8/HLA-DRB1/BTN3A1/DUSP22/PIK3R1/HLA-DPB1/CD79B/PSMB6/BTN3A2/ITK/RPS3/PSMB5/HLA-DRA/CD247/HLA-DQB1/LPXN/PRKCH/CMTM3/LCK/IKBKB/PSMA7/EIF2B4	25
tan	GO:0045727	positive regulation of translation	15/504	120/17653	1.67269e-06	0.000154316	0.000146501	EIF2B5/CIRBP/HNRNPD/RPS9/UHMK1/RPS4X/NPM1/PASK/COA3/EIF2AK4/EEF2/RPL5/RBM3/MRPS27/EIF3D	15
tan	GO:0003743	translation initiation factor activity	10/508	51/17548	1.66431e-06	0.000217691	0.000201819	EIF2B5/EIF3K/EIF2D/EIF3L/EIF4E2/EIF4H/EIF3I/EIF2B4/EIF3G/EIF3D	10
tan	GO:0034250	positive regulation of cellular amide metabolic process	16/504	140/17653	2.52625e-06	0.000227236	0.000215728	EIF2B5/CIRBP/HNRNPD/RPS9/UHMK1/RPS4X/NPM1/PASK/COA3/EIF2AK4/EEF2/RPL5/RBM3/RACK1/MRPS27/EIF3D	16
tan	GO:0043209	myelin sheath	16/523	164/18698	1.51976e-05	0.000384499	0.00031275	PRDX1/PHB/VDAC2/VDAC1/SLC25A5/MDH2/ATP5F1A/HSPA8/ATP1A1/NDUFV2/CCT3/AKR1B1/ACTB/ANXA2/IDH3A/LDHB	16
tan	GO:0006418	tRNA aminoacylation for protein translation	9/504	49/17653	8.72176e-06	0.000765387	0.000726626	IARS/DALRD3/LRRC47/EPRS/YARS2/HARS2/AIMP2/FARS2/DARS	9
tan	GO:0000028	ribosomal small subunit assembly	6/504	19/17653	1.03922e-05	0.000890263	0.000845178	RPS14/RPS28/RPSA/RPS19/RPL38/RPS10	6
tan	GO:0043039	tRNA aminoacylation	9/504	52/17653	1.4476e-05	0.00121127	0.00114993	IARS/DALRD3/LRRC47/EPRS/YARS2/HARS2/AIMP2/FARS2/DARS	9
tan	GO:0042613	MHC class II protein complex	5/523	16/18698	5.68158e-05	0.00136899	0.00111353	HLA-DRB1/HLA-DPB1/HLA-DRA/HLA-DQB1/HLA-DMA	5
tan	GO:0043038	amino acid activation	9/504	53/17653	1.70012e-05	0.00139023	0.00131983	IARS/DALRD3/LRRC47/EPRS/YARS2/HARS2/AIMP2/FARS2/DARS	9
tan	GO:0005852	eukaryotic translation initiation factor 3 complex	5/523	17/18698	7.86436e-05	0.0018088	0.00147128	EIF3K/EIF3L/EIF3I/EIF3G/EIF3D	5
tan	GO:0005681	spliceosomal complex	16/523	190/18698	9.15193e-05	0.00201343	0.00163771	LSM2/SNRPF/TXNL4A/DDX23/SNU13/UHMK1/RBM28/PRPF3/U2AF1/HSPA8/PPIE/RBMX/SNRPA1/USP39/SNRNP25/HNRNPA1L2	16
tan	GO:0019081	viral translation	5/504	14/17653	3.00727e-05	0.00240448	0.00228271	EIF2D/EIF3L/EIF2AK4/EIF3G/EIF3D	5
tan	GO:0043624	cellular protein complex disassembly	18/504	209/17653	3.2622e-05	0.00255161	0.00242239	MRPL18/MRPS15/MRPL16/MRPL23/MRPL46/MRPL20/HSPA8/TRMT112/MRPL53/MRPL49/MRPS16/MRPL43/MRPL34/MRPL36/MRPL24/MRPL12/CIB1/MRPS27	18
tan	GO:0045296	cadherin binding	24/508	324/17548	2.67129e-05	0.00270119	0.00250424	RANBP1/PRDX1/SEPTIN9/RPL6/EEF1G/PFKP/ATXN2L/PSMB6/RPL14/RPL29/HSPA8/RPL23A/RPS2/EIF4H/SERBP1/EEF2/PARK7/ANXA2/CCT8/RACK1/RPL7A/RPL15/EEF1D/MPRIP	24
tan	GO:0004812	aminoacyl-tRNA ligase activity	8/508	44/17548	3.30421e-05	0.00270119	0.00250424	IARS/DALRD3/LRRC47/EPRS/YARS2/HARS2/FARS2/DARS	8
tan	GO:0016875	ligase activity, forming carbon-oxygen bonds	8/508	44/17548	3.30421e-05	0.00270119	0.00250424	IARS/DALRD3/LRRC47/EPRS/YARS2/HARS2/FARS2/DARS	8
tan	GO:0044452	nucleolar part	15/523	179/18698	0.0001589	0.00335014	0.00272499	MRPL23/SNU13/RPP38/EIF3L/RRP1B/POLR2F/DKC1/NFKBIE/NOP53/NOL11/CDCA7L/STN1/WDR37/GAR1/EEF1D	15
tan	GO:1904874	positive regulation of telomerase RNA localization to Cajal body	5/504	15/17653	4.40524e-05	0.00337235	0.00320157	CCT7/DKC1/CCT3/CCT4/CCT8	5
tan	GO:0006278	RNA-dependent DNA biosynthetic process	10/504	75/17653	5.16687e-05	0.00381079	0.0036178	PPIA/CCT7/TINF2/DKC1/CCT3/CCT4/STN1/HMBOX1/CCT8/GAR1	10
tan	GO:0000723	telomere maintenance	15/504	159/17653	5.18979e-05	0.00381079	0.0036178	CCT7/MYC/DCLRE1C/HNRNPD/TINF2/DKC1/CCT3/CCT4/PCNA/RFC4/STN1/HMBOX1/CCT8/GAR1/RPA2	15
tan	GO:0023026	MHC class II protein complex binding	5/508	16/17548	6.68331e-05	0.00485654	0.00450244	HLA-DRB1/HSPA8/CD81/HLA-DRA/HLA-DMA	5
tan	GO:0017101	aminoacyl-tRNA synthetase multienzyme complex	4/523	12/18698	0.000250491	0.00506994	0.00412388	IARS/EPRS/AIMP2/DARS	4
tan	GO:0045333	cellular respiration	16/504	183/17653	7.39705e-05	0.00532292	0.00505335	COQ9/NDUFS6/PRELID1/NDUFA12/SDHAF2/MDH2/NDUFA11/NDUFC2/FXN/NDUFV2/UQCR10/PARK7/ETFA/NOP53/IDH3A/COX4I1	16
tan	GO:2000573	positive regulation of DNA biosynthetic process	9/504	64/17653	8.00133e-05	0.00561223	0.00532801	CCT7/MYC/HNRNPD/DKC1/CCT3/CCT4/RFC4/HMBOX1/CCT8	9
tan	GO:0032204	regulation of telomere maintenance	10/504	79/17653	8.11106e-05	0.00561223	0.00532801	CCT7/MYC/HNRNPD/TINF2/DKC1/CCT3/CCT4/STN1/HMBOX1/CCT8	10
tan	GO:0005839	proteasome core complex	5/523	22/18698	0.000298103	0.00580154	0.00471895	PSMA5/PSMB8/PSMB6/PSMB5/PSMA7	5
tan	GO:0005832	chaperonin-containing T-complex	4/523	13/18698	0.000353844	0.00663129	0.00539387	CCT7/CCT3/CCT4/CCT8	4
tan	GO:0002429	immune response-activating cell surface receptor signaling pathway	28/504	450/17653	0.000103138	0.00697962	0.00662615	HRAS/EIF2B5/PSMA5/NCR3/PSMB8/HLA-DRB1/BTN3A1/DUSP22/PIK3R1/HLA-DPB1/CD79B/PSMB6/BTN3A2/ITK/RPS3/PSMB5/HLA-DRA/CD247/HLA-DQB1/LPXN/PRKCH/ACTB/CMTM3/LCK/IKBKB/CYFIP2/PSMA7/EIF2B4	28
tan	GO:0006119	oxidative phosphorylation	13/504	132/17653	0.000104752	0.00697962	0.00662615	COQ9/NDUFS6/NDUFA12/SDHAF2/ATP5F1A/NDUFA11/NDUFC2/FXN/NDUFV2/UQCR10/PARK7/ATP5MC1/COX4I1	13
tan	GO:0033108	mitochondrial respiratory chain complex assembly	11/504	98/17653	0.000109849	0.00718612	0.0068222	NDUFS6/COA1/NDUFA12/SDHAF2/SMIM20/NDUFA11/NDUFC2/NDUFV2/COA3/SCO1/UQCR10	11
tan	GO:1904872	regulation of telomerase RNA localization to Cajal body	5/504	18/17653	0.000117072	0.00733238	0.00696105	CCT7/DKC1/CCT3/CCT4/CCT8	5
tan	GO:0006383	transcription by RNA polymerase III	8/504	53/17653	0.000119565	0.00733238	0.00696105	GTF3C2/POLR3GL/POLR2F/ZNF345/POLR3K/POLR3E/GTF3A/GTF3C3	8
tan	GO:0032210	regulation of telomere maintenance via telomerase	8/504	53/17653	0.000119565	0.00733238	0.00696105	CCT7/TINF2/DKC1/CCT3/CCT4/STN1/HMBOX1/CCT8	8
tan	GO:0070203	regulation of establishment of protein localization to telomere	4/504	10/17653	0.000120236	0.00733238	0.00696105	CCT7/DKC1/CCT4/CCT8	4
tan	GO:0032200	telomere organization	15/504	172/17653	0.000126847	0.00748877	0.00710952	CCT7/MYC/DCLRE1C/HNRNPD/TINF2/DKC1/CCT3/CCT4/PCNA/RFC4/STN1/HMBOX1/CCT8/GAR1/RPA2	15
tan	GO:0031647	regulation of protein stability	19/504	253/17653	0.000126964	0.00748877	0.00710952	XBP1/CCT7/PHB/STUB1/CCDC88C/PIN1/PIK3R1/HSPA8/MDM4/CD81/CCT3/CCT4/TBRG1/RPL5/PHB2/PARK7/NOP53/CCT8/RNF5	19
tan	GO:0007004	telomere maintenance via telomerase	9/504	68/17653	0.000129435	0.0075114	0.007131	CCT7/TINF2/DKC1/CCT3/CCT4/STN1/HMBOX1/CCT8/GAR1	9
tan	GO:0006403	RNA localization	18/504	233/17653	0.000133275	0.00761151	0.00722605	RANBP1/MRPL18/ZNHIT6/CCT7/MCM3AP/RPSA/U2AF1/NPM1/RNPS1/DKC1/CCT3/CCT4/HNRNPA1L2/NOP53/CCT8/THOC3/CPSF6/CPSF4	18
tan	GO:0002768	immune response-regulating cell surface receptor signaling pathway	29/504	482/17653	0.000139417	0.00775018	0.0073577	HRAS/EIF2B5/PSMA5/NCR3/PSMB8/CD40/HLA-DRB1/BTN3A1/DUSP22/PIK3R1/HLA-DPB1/CD79B/PSMB6/BTN3A2/ITK/RPS3/PSMB5/HLA-DRA/CD247/HLA-DQB1/LPXN/PRKCH/ACTB/CMTM3/LCK/IKBKB/CYFIP2/PSMA7/EIF2B4	29
tan	GO:0009303	rRNA transcription	6/504	29/17653	0.00014273	0.00775018	0.0073577	GTF3C2/NCL/NOP53/NOL11/GTF3A/GTF3C3	6
tan	GO:0098781	ncRNA transcription	11/504	101/17653	0.00014432	0.00775018	0.0073577	GTF3C2/INTS14/TAF11/NCL/POLR2F/GTF2A2/INTS10/NOP53/NOL11/GTF3A/GTF3C3	11
tan	GO:2000278	regulation of DNA biosynthetic process	11/504	101/17653	0.00014432	0.00775018	0.0073577	CCT7/MYC/HNRNPD/TINF2/DKC1/CCT3/CCT4/RFC4/STN1/HMBOX1/CCT8	11
tan	GO:0090670	RNA localization to Cajal body	5/504	19/17653	0.000155172	0.00786353	0.0074653	CCT7/DKC1/CCT3/CCT4/CCT8	5
tan	GO:0090671	telomerase RNA localization to Cajal body	5/504	19/17653	0.000155172	0.00786353	0.0074653	CCT7/DKC1/CCT3/CCT4/CCT8	5
tan	GO:0090672	telomerase RNA localization	5/504	19/17653	0.000155172	0.00786353	0.0074653	CCT7/DKC1/CCT3/CCT4/CCT8	5
tan	GO:0090685	RNA localization to nucleus	5/504	19/17653	0.000155172	0.00786353	0.0074653	CCT7/DKC1/CCT3/CCT4/CCT8	5
tan	GO:0031301	integral component of organelle membrane	14/523	177/18698	0.000469826	0.00845316	0.00687578	ENTPD4/PCSK7/RER1/COA1/P2RX7/VOPP1/SLC35B2/COA3/SLC25A17/MICOS10/SCO1/MCUB/P2RX5/VAMP5	14
tan	GO:0101031	chaperone complex	4/523	14/18698	0.00048447	0.00845316	0.00687578	CCT7/CCT3/CCT4/CCT8	4
tan	GO:0070202	regulation of establishment of protein localization to chromosome	4/504	11/17653	0.000184684	0.00910267	0.00864169	CCT7/DKC1/CCT4/CCT8	4
tan	GO:1904816	positive regulation of protein localization to chromosome, telomeric region	4/504	11/17653	0.000184684	0.00910267	0.00864169	CCT7/DKC1/CCT4/CCT8	4
tan	GO:0042611	MHC protein complex	5/523	25/18698	0.000561196	0.0094655	0.00769921	HLA-DRB1/HLA-DPB1/HLA-DRA/HLA-DQB1/HLA-DMA	5
tan	GO:0098800	inner mitochondrial membrane protein complex	12/523	141/18698	0.000613398	0.0100122	0.00814393	NDUFS6/NDUFA12/ATP5F1A/NDUFA11/NDUFC2/NDUFV2/MICOS10/UQCR10/MCUB/PARK7/ATP5MC1/COX4I1	12
tan	GO:0022900	electron transport chain	15/504	180/17653	0.000209724	0.0101971	0.0096807	COQ9/NDUFS6/NDUFA12/SDHAF2/GLRX2/NDUFA11/NDUFC2/NDUFV2/AKR7A3/AKR1B1/CYB5A/UQCR10/PARK7/ETFA/COX4I1	15
tan	GO:0006397	mRNA processing	29/504	495/17653	0.000218798	0.0104965	0.00996491	LSM2/ARL6IP4/SNRPF/TXNL4A/DDX23/SNU13/HNRNPD/TENT4A/RBM28/PRPF3/RRP1B/POLR2F/U2AF1/SSU72/HSPA8/PPIE/RNPS1/ZPR1/RBMX/SNRPA1/USP39/NONO/SNRNP25/HNRNPA1L2/RPUSD3/ADARB1/THOC3/CPSF6/CPSF4	29
tan	GO:0006862	nucleotide transport	5/504	21/17653	0.000259026	0.0122628	0.0116418	SLC25A5/P2RX7/SLC35B2/SLC25A17/SLC25A42	5
tan	GO:0023023	MHC protein complex binding	5/508	20/17548	0.000215525	0.0133382	0.0123657	HLA-DRB1/HSPA8/CD81/HLA-DRA/HLA-DMA	5
tan	GO:0004298	threonine-type endopeptidase activity	5/508	21/17548	0.000276186	0.0133382	0.0123657	PSMA5/PSMB8/PSMB6/PSMB5/PSMA7	5
tan	GO:0070003	threonine-type peptidase activity	5/508	21/17548	0.000276186	0.0133382	0.0123657	PSMA5/PSMB8/PSMB6/PSMB5/PSMA7	5
tan	GO:0000295	adenine nucleotide transmembrane transporter activity	4/508	12/17548	0.000285526	0.0133382	0.0123657	SLC25A5/SLC35B2/SLC25A17/SLC25A42	4
tan	GO:0005346	purine ribonucleotide transmembrane transporter activity	4/508	12/17548	0.000285526	0.0133382	0.0123657	SLC25A5/SLC35B2/SLC25A17/SLC25A42	4
tan	GO:0032984	protein-containing complex disassembly	21/504	314/17653	0.000286423	0.013372	0.0126948	MRPL18/MRPS15/MRPL16/MYC/MRPL23/EIF2D/MRPL46/MRPL20/HSPA8/TRMT112/MRPL53/MRPL49/MRPS16/MRPL43/MRPL34/MRPL36/MRPL24/SNAPIN/MRPL12/CIB1/MRPS27	21
tan	GO:1904356	regulation of telomere maintenance via telomere lengthening	8/504	60/17653	0.000289888	0.013372	0.0126948	CCT7/TINF2/DKC1/CCT3/CCT4/STN1/HMBOX1/CCT8	8
tan	GO:0071897	DNA biosynthetic process	16/504	209/17653	0.000343111	0.0156268	0.0148354	PPIA/CCT7/PHB/MYC/HNRNPD/TINF2/DKC1/CCT3/CCT4/PCNA/RFC4/STN1/HMBOX1/CCT8/GAR1/RPA2	16
tan	GO:0032212	positive regulation of telomere maintenance via telomerase	6/504	34/17653	0.000358092	0.0161052	0.0152896	CCT7/DKC1/CCT3/CCT4/HMBOX1/CCT8	6
tan	GO:0042775	mitochondrial ATP synthesis coupled electron transport	10/504	95/17653	0.000379034	0.0167764	0.0159268	COQ9/NDUFS6/NDUFA12/SDHAF2/NDUFA11/NDUFC2/NDUFV2/UQCR10/PARK7/COX4I1	10
tan	GO:1904814	regulation of protein localization to chromosome, telomeric region	4/504	13/17653	0.000382341	0.0167764	0.0159268	CCT7/DKC1/CCT4/CCT8	4
tan	GO:0022904	respiratory electron transport chain	11/504	113/17653	0.00038861	0.016846	0.0159929	COQ9/NDUFS6/NDUFA12/SDHAF2/NDUFA11/NDUFC2/NDUFV2/UQCR10/PARK7/ETFA/COX4I1	11
tan	GO:0005666	DNA-directed RNA polymerase III complex	4/523	17/18698	0.00107757	0.0168847	0.0137339	POLR3GL/POLR2F/POLR3K/POLR3E	4
tan	GO:0031300	intrinsic component of organelle membrane	14/523	193/18698	0.00110117	0.0168847	0.0137339	ENTPD4/PCSK7/RER1/COA1/P2RX7/VOPP1/SLC35B2/COA3/SLC25A17/MICOS10/SCO1/MCUB/P2RX5/VAMP5	14
tan	GO:0010833	telomere maintenance via telomere lengthening	9/504	79/17653	0.000409863	0.017462	0.0165777	CCT7/TINF2/DKC1/CCT3/CCT4/STN1/HMBOX1/CCT8/GAR1	9
tan	GO:0042773	ATP synthesis coupled electron transport	10/504	96/17653	0.000412527	0.017462	0.0165777	COQ9/NDUFS6/NDUFA12/SDHAF2/NDUFA11/NDUFC2/NDUFV2/UQCR10/PARK7/COX4I1	10
tan	GO:0015216	purine nucleotide transmembrane transporter activity	4/508	13/17548	0.000403021	0.0175717	0.0162905	SLC25A5/SLC35B2/SLC25A17/SLC25A42	4
tan	GO:0006517	protein deglycosylation	6/504	35/17653	0.000421873	0.01765	0.0167562	AGA/MAN2C1/PARK7/MAN1B1/DERL2/RNF5	6
tan	GO:0001650	fibrillar center	11/523	133/18698	0.0012921	0.0192295	0.0156412	MRPL23/RPP38/EIF3L/POLR2F/DKC1/NFKBIE/NOP53/CDCA7L/STN1/GAR1/EEF1D	11
tan	GO:0002478	antigen processing and presentation of exogenous peptide antigen	14/504	174/17653	0.00048243	0.0199316	0.0189222	PSMA5/PSMB8/HLA-DRB1/ACTR1B/HLA-DPB1/PSMB6/DYNLL1/PSMB5/HLA-DRA/CLTA/HLA-DQB1/HLA-DMA/IKBKB/PSMA7	14
tan	GO:1904358	positive regulation of telomere maintenance via telomere lengthening	6/504	36/17653	0.000494181	0.0199316	0.0189222	CCT7/DKC1/CCT3/CCT4/HMBOX1/CCT8	6
tan	GO:0000470	maturation of LSU-rRNA	5/504	24/17653	0.000504105	0.0199316	0.0189222	SNU13/RPL35/RPL10A/WDR37/RPL7A	5
tan	GO:0006851	mitochondrial calcium ion transmembrane transport	5/504	24/17653	0.000504105	0.0199316	0.0189222	PHB/VDAC1/MAIP1/MCUB/PHB2	5
tan	GO:0010499	proteasomal ubiquitin-independent protein catabolic process	5/504	24/17653	0.000504105	0.0199316	0.0189222	PSMA5/PSMB8/PSMB6/PSMB5/PSMA7	5
tan	GO:0044455	mitochondrial membrane part	15/523	220/18698	0.00138789	0.020065	0.0163208	NDUFS6/COA1/NDUFA12/ATP5F1A/NDUFA11/NDUFC2/NDUFV2/COA3/MICOS10/SCO1/UQCR10/MCUB/PARK7/ATP5MC1/COX4I1	15
tan	GO:0051503	adenine nucleotide transport	4/504	14/17653	0.000523249	0.0204636	0.0194273	SLC25A5/SLC35B2/SLC25A17/SLC25A42	4
tan	GO:0015931	nucleobase-containing compound transport	17/504	240/17653	0.000557165	0.0215557	0.0204641	RANBP1/MRPL18/MCM3AP/SLC25A5/RPSA/P2RX7/U2AF1/NPM1/RNPS1/SLC35B2/SLC25A17/HNRNPA1L2/NOP53/THOC3/CPSF6/SLC25A42/CPSF4	17
tan	GO:0000462	maturation of SSU-rRNA from tricistronic rRNA transcript (SSU-rRNA, 5.8S rRNA, LSU-rRNA)	6/504	37/17653	0.000575778	0.0219115	0.0208019	RPS8/RPS14/RPSA/RPS19/RPS16/EMG1	6
tan	GO:0032206	positive regulation of telomere maintenance	7/504	51/17653	0.000578542	0.0219115	0.0208019	CCT7/HNRNPD/DKC1/CCT3/CCT4/HMBOX1/CCT8	7
tan	GO:0006120	mitochondrial electron transport, NADH to ubiquinone	7/504	52/17653	0.000652347	0.0242247	0.0229979	COQ9/NDUFS6/NDUFA12/NDUFA11/NDUFC2/NDUFV2/PARK7	7
tan	GO:0050821	protein stabilization	13/504	159/17653	0.000653085	0.0242247	0.0229979	CCT7/PHB/PIN1/PIK3R1/MDM4/CCT3/CCT4/TBRG1/RPL5/PHB2/PARK7/NOP53/CCT8	13
tan	GO:0015868	purine ribonucleotide transport	4/504	15/17653	0.000697502	0.0251499	0.0238763	SLC25A5/SLC35B2/SLC25A17/SLC25A42	4
tan	GO:0070200	establishment of protein localization to telomere	4/504	15/17653	0.000697502	0.0251499	0.0238763	CCT7/DKC1/CCT4/CCT8	4
tan	GO:0008380	RNA splicing	25/504	432/17653	0.000698997	0.0251499	0.0238763	LSM2/ARL6IP4/SNRPF/TXNL4A/DDX23/SNU13/HNRNPD/RBM28/PRPF3/RRP1B/PIK3R1/POLR2F/U2AF1/HSPA8/PPIE/RNPS1/ZPR1/RBMX/SNRPA1/USP39/NONO/SNRNP25/HNRNPA1L2/THOC3/CPSF4	25
tan	GO:0042162	telomeric DNA binding	6/508	37/17548	0.000619277	0.0253129	0.0234673	HNRNPD/NCL/TINF2/STN1/HMBOX1/RPA2	6
tan	GO:0019884	antigen processing and presentation of exogenous antigen	14/504	181/17653	0.000714516	0.0254537	0.0241647	PSMA5/PSMB8/HLA-DRB1/ACTR1B/HLA-DPB1/PSMB6/DYNLL1/PSMB5/HLA-DRA/CLTA/HLA-DQB1/HLA-DMA/IKBKB/PSMA7	14
tan	GO:0097525	spliceosomal snRNP complex	7/523	63/18698	0.00183839	0.0258397	0.0210179	LSM2/SNRPF/TXNL4A/DDX23/SNU13/PRPF3/SNRPA1	7
tan	GO:0043021	ribonucleoprotein complex binding	11/508	120/17548	0.000727348	0.0266962	0.0247497	LETMD1/EIF3K/UHMK1/RPSA/MAIP1/NPM1/EIF4H/EEF2/RACK1/CPSF6/MRPS27	11
tan	GO:0019104	DNA N-glycosylase activity	4/508	15/17548	0.000734758	0.0266962	0.0247497	MPG/RPS3/PCNA/NEIL1	4
tan	GO:0043022	ribosome binding	7/508	53/17548	0.0007956	0.0273854	0.0253887	LETMD1/EIF3K/RPSA/MAIP1/EEF2/RACK1/MRPS27	7
tan	GO:0008033	tRNA processing	11/504	124/17653	0.000854271	0.030134	0.0286079	ELP6/RPP38/HSD17B10/TRMT112/RPUSD3/PUS1/DUS1L/SEPHS2/CPSF4/FARS2/TP53RK	11
tan	GO:0034504	protein localization to nucleus	17/504	250/17653	0.000880265	0.0307494	0.0291922	RANBP1/CCT7/MCM3AP/PIN1/KPNA2/BANP/ZPR1/SEC61B/CCT3/CCT4/TBRG1/HIKESHI/SYNE1/PHB2/PARK7/NOP53/CCT8	17
tan	GO:0070198	protein localization to chromosome, telomeric region	5/504	27/17653	0.000892245	0.0308594	0.0292967	CCT7/TINF2/DKC1/CCT4/CCT8	5
tan	GO:0015865	purine nucleotide transport	4/504	16/17653	0.000909144	0.0308594	0.0292967	SLC25A5/SLC35B2/SLC25A17/SLC25A42	4
tan	GO:0046931	pore complex assembly	4/504	16/17653	0.000909144	0.0308594	0.0292967	P2RX7/GSDMD/CCT3/CCT8	4
tan	GO:0048002	antigen processing and presentation of peptide antigen	14/504	187/17653	0.000982778	0.0330471	0.0313735	PSMA5/PSMB8/HLA-DRB1/ACTR1B/HLA-DPB1/PSMB6/DYNLL1/PSMB5/HLA-DRA/CLTA/HLA-DQB1/HLA-DMA/IKBKB/PSMA7	14
tan	GO:0032588	trans-Golgi network membrane	8/523	85/18698	0.00259224	0.0334876	0.0272387	HLA-DRB1/RABEPK/HLA-DPB1/HLA-DRA/CLTA/HLA-DQB1/AP4B1/COG2	8
tan	GO:0098803	respiratory chain complex	8/523	85/18698	0.00259224	0.0334876	0.0272387	NDUFS6/NDUFA12/NDUFA11/NDUFC2/NDUFV2/UQCR10/PARK7/COX4I1	8
tan	GO:0036464	cytoplasmic ribonucleoprotein granule	13/523	191/18698	0.00286586	0.0334876	0.0272387	LSM2/RPLP0/CIRBP/RPS6/RPL6/UHMK1/NCL/TSTD1/ATXN2L/RPS4X/SYNE1/RPL28/ACTB	13
tan	GO:0005747	mitochondrial respiratory chain complex I	6/523	51/18698	0.00288305	0.0334876	0.0272387	NDUFS6/NDUFA12/NDUFA11/NDUFC2/NDUFV2/PARK7	6
tan	GO:0030964	NADH dehydrogenase complex	6/523	51/18698	0.00288305	0.0334876	0.0272387	NDUFS6/NDUFA12/NDUFA11/NDUFC2/NDUFV2/PARK7	6
tan	GO:0045271	respiratory chain complex I	6/523	51/18698	0.00288305	0.0334876	0.0272387	NDUFS6/NDUFA12/NDUFA11/NDUFC2/NDUFV2/PARK7	6
tan	GO:0042470	melanosome	9/523	106/18698	0.00291197	0.0334876	0.0272387	PRDX1/SYNGR1/HSPA8/DTNBP1/ERP29/ATP1A1/CCT4/SYTL2/ANXA2	9
tan	GO:0048770	pigment granule	9/523	106/18698	0.00291197	0.0334876	0.0272387	PRDX1/SYNGR1/HSPA8/DTNBP1/ERP29/ATP1A1/CCT4/SYTL2/ANXA2	9
tan	GO:0019774	proteasome core complex, beta-subunit complex	3/523	11/18698	0.00303594	0.0341374	0.0277673	PSMB8/PSMB6/PSMB5	3
tan	GO:0015980	energy derivation by oxidation of organic compounds	18/504	277/17653	0.00105991	0.0353106	0.0335224	COQ9/NDUFS6/MYC/PRELID1/NDUFA12/SDHAF2/MDH2/NDUFA11/PASK/NDUFC2/FXN/NDUFV2/UQCR10/PARK7/ETFA/NOP53/IDH3A/COX4I1	18
tan	GO:0050839	cell adhesion molecule binding	27/508	489/17548	0.00108178	0.0353743	0.0327951	RANBP1/PRDX1/SEPTIN9/NCR3/RPL6/EEF1G/PFKP/ITGB1BP1/ATXN2L/PSMB6/RPL14/RPL29/HSPA8/RPL23A/RPS2/EIF4H/NISCH/SERBP1/EEF2/PARK7/ANXA2/CCT8/RACK1/RPL7A/RPL15/EEF1D/MPRIP	27
tan	GO:0043487	regulation of RNA stability	13/504	168/17653	0.00109006	0.0359819	0.0341597	PSMA5/PSMB8/CIRBP/HNRNPD/EXOSC1/PSMB6/HSPA8/NPM1/PSMB5/EXOSC7/DKC1/SERBP1/PSMA7	13
tan	GO:0009451	RNA modification	12/504	148/17653	0.00111976	0.0366262	0.0347714	ELP6/HSD17B10/EMG1/TRMT112/DKC1/NSUN5/RPUSD3/ADARB1/PUS1/DUS1L/SEPHS2/GAR1	12
tan	GO:0015215	nucleotide transmembrane transporter activity	4/508	17/17548	0.00122354	0.0367681	0.0340873	SLC25A5/SLC35B2/SLC25A17/SLC25A42	4
tan	GO:0044183	protein binding involved in protein folding	6/508	42/17548	0.00123685	0.0367681	0.0340873	CCT7/HSPA8/CCT3/CCT4/PFDN2/CCT8	6
tan	GO:0030532	small nuclear ribonucleoprotein complex	7/523	70/18698	0.00337041	0.0370745	0.0301563	LSM2/SNRPF/TXNL4A/DDX23/SNU13/PRPF3/SNRPA1	7
tan	GO:0140098	catalytic activity, acting on RNA	22/508	375/17548	0.00143515	0.0408081	0.0378327	POLR3GL/DDX23/RPP38/NOB1/POLR2F/EMG1/IARS/DALRD3/TRMT112/POLR3K/LRRC47/EXOSC7/NSUN5/EPRS/YARS2/POLR3E/HARS2/DUS1L/CPSF4/DDX55/FARS2/DARS	22
tan	GO:0030688	preribosome, small subunit precursor	3/523	12/18698	0.00396442	0.0426808	0.0347164	NOB1/RRP1B/RIOK1	3
tan	GO:0046540	U4/U6 x U5 tri-snRNP complex	4/523	24/18698	0.00412094	0.0434415	0.0353352	LSM2/TXNL4A/SNU13/PRPF3	4
tan	GO:0035770	ribonucleoprotein granule	13/523	200/18698	0.00424316	0.0437635	0.0355971	LSM2/RPLP0/CIRBP/RPS6/RPL6/UHMK1/NCL/TSTD1/ATXN2L/RPS4X/SYNE1/RPL28/ACTB	13
tan	GO:0031304	intrinsic component of mitochondrial inner membrane	5/523	39/18698	0.00441095	0.0437635	0.0355971	COA1/COA3/MICOS10/SCO1/MCUB	5
tan	GO:0031305	integral component of mitochondrial inner membrane	5/523	39/18698	0.00441095	0.0437635	0.0355971	COA1/COA3/MICOS10/SCO1/MCUB	5
tan	GO:0005746	mitochondrial respiratory chain	8/523	93/18698	0.00452232	0.0440056	0.035794	NDUFS6/NDUFA12/NDUFA11/NDUFC2/NDUFV2/UQCR10/PARK7/COX4I1	8
tan	GO:0015030	Cajal body	6/523	56/18698	0.00462377	0.0441439	0.0359065	PRPF3/U2AF1/HINFP/ZPR1/DKC1/GAR1	6
tan	GO:0001522	pseudouridine synthesis	4/504	18/17653	0.00146086	0.0470616	0.0446783	DKC1/RPUSD3/PUS1/GAR1	4
tan	GO:0042177	negative regulation of protein catabolic process	10/504	113/17653	0.00147782	0.0470616	0.0446783	PHB/PIN1/BANP/MDM4/SCO1/RPL5/PARK7/ANXA2/NOP53/DERL2	10
tan	GO:0009205	purine ribonucleoside triphosphate metabolic process	19/504	309/17653	0.00148913	0.0470616	0.0446783	COQ9/NDUFS6/DDIT4/NDUFA12/SDHAF2/P2RX7/PFKP/ATP5F1A/HSPA8/NDUFA11/NDUFC2/FXN/NDUFV2/UQCR10/PARK7/ATP5MC1/GIMAP7/COX4I1/NME6	19
tan	GO:0035821	modification of morphology or physiology of other organism	12/504	153/17653	0.00149111	0.0470616	0.0446783	TAF11/RRP1B/KPNA2/P2RX7/RPS19/GSDMD/HSPA8/EIF2AK4/HMGN2/CCL4/ANXA2/CPSF4	12
tan	GO:0009055	electron transfer activity	10/508	114/17548	0.0017492	0.0476658	0.0441904	NDUFS6/NDUFA12/GLRX2/NDUFV2/AKR7A3/AKR1B1/CYB5A/UQCR10/ETFA/COX4I1	10
tan	GO:0031295	T cell costimulation	8/504	77/17653	0.00156338	0.0489135	0.0464364	HLA-DRB1/PIK3R1/HLA-DPB1/HLA-DRA/CD247/HLA-DQB1/LCK/DPP4	8
tan	GO:0042288	MHC class I protein binding	4/508	19/17548	0.00190326	0.0497892	0.0461589	PILRB/ATP5F1A/CD244/CD8A	4

[truncated: 3 more sheets: white, yellow, orange]
