# Supplementary material for: Vitamins D2 and D3 have overlapping but different effects on human gene expression revealed through analysis of blood transcriptomes in a randomised double-blind placebo-controlled food-fortification trial
Source: medRxiv preprint, doi:10.1101/2020.12.16.20247700, version 2 (2021-02-22)
Supplement: Supplemental data file 9 [file 247700_file04.xlsx]

## Sheet: SA placebo
ID	Description	setSize	enrichmentScore	NES	pvalue	p.adjust	qvalues	rank	leading_edge	core_enrichment
HALLMARK_HEME_METABOLISM	HALLMARK_HEME_METABOLISM	191	-0.490101	-2.64755	2.36356e-17	6.02774e-16	4.44149e-16	5212	tags=52%, list=24%, signal=40%	MOCOS/RHD/NFE2/CPOX/KLF1/RHAG/ABCB6/NR3C1/ASNS/PICALM/NEK7/GATA1/SLC30A1/ARHGEF12/GCLM/ACSL6/CTNS/SIDT2/MYL4/TAL1/CDC27/ARL2BP/CTSB/TNRC6B/NCOA4/HAGH/LPIN2/ERMAP/EPB42/ATP6V0A1/HDGF/OSBP2/XK/ADD1/MOSPD1/HBZ/GYPA/SNCA/EIF2AK1/OPTN/SELENBP1/CLIC2/KAT2B/NUDT4/FTCD/GYPB/ADIPOR1/CTSE/BMP2K/MXI1/TSPO2/PC/BACH1/RNF123/TRIM10/DCAF10/TFDP2/TMCC2/BPGM/TSPAN5/PPP2R5B/SLC6A8/GLRX5/MINPP1/RAP1GAP/RIOK3/HEBP1/…
HALLMARK_OXIDATIVE_PHOSPHORYLATION	HALLMARK_OXIDATIVE_PHOSPHORYLATION	183	0.529128	2.56433	2.4111e-17	6.02774e-16	4.44149e-16	4142	tags=52%, list=19%, signal=42%	MTRR/MRPL34/MRPL11/SLC25A6/MRPS15/NDUFS3/UQCR10/NDUFB8/MGST3/PHB2/MRPL15/POLR2F/HTRA2/ATP6V1F/NDUFB2/COX4I1/COX7A2L/ATP6V0E1/COX17/HSD17B10/COX6A1/TIMM13/NDUFS6/NDUFAB1/MDH1/MRPS11/ATP6V1G1/MRPS30/ATP6V1E1/NDUFA3/NDUFA7/COX7A2/CYC1/UQCRQ/FXN/NDUFS7/UQCRH/SDHD/NDUFA4/NDUFC2/TOMM22/NDUFV2/ETFA/TIMM8B/NDUFB7/NDUFB6/ACAT1/NDUFA9/MRPS12/COX7B/COX6C/NDUFS4/OPA1/ACADM/GPX4/UQCR11/ECI1/TIMM17A/GLUD1/MTX2…
HALLMARK_MYC_TARGETS_V1	HALLMARK_MYC_TARGETS_V1	193	0.505801	2.46453	5.13375e-16	8.55625e-15	6.3046e-15	4759	tags=53%, list=22%, signal=41%	RPLP0/PRDX4/RPS10/RSL1D1/PHB2/RPS2/NME1/PPIA/MRPL23/RPL6/RPL18/PHB/STARD7/PSMA4/PSMA2/SNRPD2/PSMA7/PSMD14/UBE2E1/NDUFAB1/UBE2L3/HNRNPC/RPS3/CDK4/ERH/VBP1/BUB3/PSMD8/COPS5/CYC1/SRSF7/ABCE1/DUT/CCT3/CCT2/LSM7/PSMA6/PGK1/EIF1AX/SSBP1/RPS6/TXNL4A/CANX/SNRPD3/SNRPG/RANBP1/RPS5/CCT7/TUFM/TRA2B/PABPC4/GLO1/CNBP/HSPE1/HDDC2/SNRPD1/SRSF3/RAN/EIF3D/RPL14/MRPL9/LDHA/EIF4A1/EIF4G2/NOP16/C1QBP/CLNS1A/FAM120A/…
HALLMARK_DNA_REPAIR	HALLMARK_DNA_REPAIR	140	0.432113	2.00988	5.39738e-07	6.74672e-06	4.97127e-06	4112	tags=39%, list=19%, signal=32%	POLE4/POLR2K/MPG/DDB2/NUDT21/NME1/POLR2F/POLR2J/GTF2A2/COX17/ZNRD1/POLB/GTF2B/ITPA/DUT/RRM2B/RPA3/POLR3GL/MRPL40/POLR2I/EDF1/GTF2H1/GTF2H5/NME3/GTF3C5/SNAPC5/TARBP2/NT5C/SAC3D1/SUPT4H1/GPX4/RNMT/ERCC1/RPA2/SURF1/SRSF6/CLP1/PRIM1/CSTF3/ERCC3/BRF2/POLD4/TAF13/ELL/PCNA/DGUOK/TMED2/IMPDH2/TAF12/RFC5/TAF10/FEN1/DAD1/TAF9/GTF2H3
HALLMARK_MYOGENESIS	HALLMARK_MYOGENESIS	198	-0.323075	-1.75881	1.30285e-05	0.000130285	9.59991e-05	3805	tags=27%, list=18%, signal=22%	TNNI1/GAA/KIFC3/LDB3/MYL7/LSP1/PFKM/DTNA/ACHE/MYH8/TCAP/ATP6AP1/EFS/TNNT2/BAG1/ITGA7/TPM3/MYH2/SH3BGR/CRYAB/PPP1R3C/DES/SPEG/PC/CHRNA1/TPM2/SCHIP1/HRC/SLC6A8/MYOG/PPFIA4/MYH9/CKMT2/NOTCH1/APP/FOXO4/GSN/SORBS3/MEF2D/GNAO1/ATP2A1/MYH7/ERBB3/TPD52L1/SVIL/ACTC1/MYLK/MYH11/CRAT/CTF1/NAV2/SPARC/SORBS1
HALLMARK_ALLOGRAFT_REJECTION	HALLMARK_ALLOGRAFT_REJECTION	195	0.320358	1.56233	0.00085403	0.00711692	0.00524404	6043	tags=37%, list=28%, signal=27%	SIT1/RPS9/NME1/STAT4/HLA-DRA/LY86/RPS19/HLA-DQA1/HLA-DMA/B2M/GZMA/TRAT1/CD8B/LIF/ABCE1/SRGN/GALNT1/RPS3A/CCL4/RPL9/RPL39/FCGR2B/CAPG/CD3D/CSF1/EGFR/HDAC9/THY1/EIF3D/MRPL3/CD47/LCK/ZAP70/ITK/UBE2N/IL18RAP/GPR65/CXCL9/EIF5A/KLRD1/F2R/NPM1/IL2/IL18/TIMP1/HLA-DMB/GZMB/PTPRC/CCL5/HLA-DOB/CCL11/CRTAM/CCND3/CD247/FAS/EIF4G3/CD8A/IFNG/CD40/IRF4/UBE2D1/CCR2/MAP4K1/IL2RA/CD7/IFNGR1/SOCS5/NCF4/CD74/CCL19/IL…
HALLMARK_WNT_BETA_CATENIN_SIGNALING	HALLMARK_WNT_BETA_CATENIN_SIGNALING	42	-0.437913	-1.77202	0.00149529	0.0106806	0.00786993	6708	tags=55%, list=31%, signal=38%	WNT1/HDAC5/CCND2/PTCH1/HDAC2/FZD8/SKP2/LEF1/DLL1/AXIN2/ADAM17/NUMB/MYC/FZD1/HEY2/CTNNB1/FRAT1/NOTCH1/TP53/HEY1/RBPJ/NCSTN/NCOR2
HALLMARK_MITOTIC_SPINDLE	HALLMARK_MITOTIC_SPINDLE	197	-0.26252	-1.42864	0.0032581	0.0203631	0.0150044	5496	tags=37%, list=26%, signal=27%	CKAP5/ABR/AURKA/PRC1/SYNPO/EPB41L2/MAP3K11/RAPGEF6/VCL/ITSN1/TIAM1/SMC4/PLEKHG2/BUB1/ARHGEF12/YWHAE/CDC42EP4/PXN/CDC27/PCGF5/SOS1/DYNC1H1/RAB3GAP1/KIF1B/FARP1/BCR/MARK4/LATS1/WASF1/LRPPRC/PALLD/ARHGEF2/FLNA/EZR/MYO1E/FLNB/NCK2/CEP72/ALMS1/FSCN1/AKAP13/TUBGCP5/CAPZB/HDAC6/NET1/MAP1S/SPTBN1/TSC1/RALBP1/MARCKS/RAPGEF5/SMC1A/ATG4B/CLASP1/ARHGAP4/KIF23/KIF3C/BCL2L11/DST/MYH9/GSN/ARAP3/PAFAH1B1/PREX1/S…
HALLMARK_HYPOXIA	HALLMARK_HYPOXIA	191	-0.259126	-1.39981	0.00452314	0.0251286	0.0185158	5346	tags=34%, list=25%, signal=25%	GPI/SDC4/PGAM2/PCK1/IDS/TGFBI/TES/SLC6A6/NR3C1/AKAP12/PAM/HSPA5/TIPARP/PGM2/COL5A1/NFIL3/CAV1/DPYSL4/PHKG1/ANGPTL4/EFNA3/SDC2/GAA/NDRG1/DTNA/PNRC1/F3/SDC3/HMOX1/LALBA/CXCR4/FBP1/SELENBP1/TGM2/PRKCA/HOXB9/GPC1/VLDLR/BCAN/CHST2/PKP1/PPP1R3C/NEDD4L/ATP7A/MXI1/ATF3/HK1/BGN/CSRP2/HK2/CCNG2/CHST3/PPFIA4/MYH9/GPC3/AMPD3/NDST1/RBPJ/GBE1/PIM1/FOXO3/SIAH2/SLC2A1/HAS1
HALLMARK_TGF_BETA_SIGNALING	HALLMARK_TGF_BETA_SIGNALING	54	-0.370476	-1.59979	0.00513862	0.0256931	0.0189318	6002	tags=43%, list=28%, signal=31%	THBS1/BMPR2/SLC20A1/JUNB/SKI/ARID4B/SMAD6/SMAD3/ACVR1/CDK9/CDH1/PMEPA1/CTNNB1/PPM1A/BMPR1A/SPTBN1/UBE2D3/LTBP2/ENG/FURIN/XIAP/NCOR2/HIPK2
HALLMARK_UV_RESPONSE_DN	HALLMARK_UV_RESPONSE_DN	139	-0.275153	-1.42605	0.0165991	0.0754506	0.0555952	5225	tags=37%, list=24%, signal=28%	INSIG1/ANXA4/TGFBR3/ATP2C1/NR3C1/SLC22A18/NFKB1/NEK7/PRKAR2B/IRS1/MYC/CAV1/SMAD3/PRDM2/SDC2/SFMBT1/RBPMS/CELF2/F3/PHF3/HAS2/ABCC1/SPOP/VAV2/DLC1/BMPR1A/NFIB/PRKCA/KALRN/SLC7A1/VLDLR/SIPA1L1/MAGI2/CDON/DAB2/RXRA/SCHIP1/SCAF8/GRK5/SYNJ2/CACNA1A/SYNE1/ATXN1/APBB2/MGLL/ITGB3/LTBP1/SCN8A/FHL2/ATP2B4/ZMIZ1/ICA1
HALLMARK_APICAL_JUNCTION	HALLMARK_APICAL_JUNCTION	194	-0.244885	-1.32418	0.0203124	0.0846349	0.0623625	5317	tags=35%, list=25%, signal=26%	EPB41L2/CTNNA1/INSIG1/TRAF1/CNN2/TGFBI/VCL/CD34/IRS1/CLDN14/DMP1/ACTG1/SLC30A3/KCNH2/MYL9/ITGA10/ITGB4/RSU1/SRC/LAYN/COL9A1/SYK/NRXN2/MADCAM1/CTNND1/CDH1/CERCAM/CDH3/ACTN1/NEGR1/YWHAH/ICAM1/SDC3/TMEM8B/JAM3/ADAMTS5/FSCN1/VAV2/MDK/CNTN1/MPZL2/GRB7/CLDN19/NEXN/PECAM1/TSC1/SPEG/TUBG1/BAIAP2/NFASC/ATP1A3/AMH/PKD1/PCDH1/MMP9/TNFRSF11B/MYH9/VWF/NF2/SORBS3/CADM3/WNK4/SHC1/MSN/ACTC1/ACTG2/CRAT
HALLMARK_ESTROGEN_RESPONSE_EARLY	HALLMARK_ESTROGEN_RESPONSE_EARLY	194	-0.239752	-1.29642	0.030272	0.115528	0.0851259	3732	tags=28%, list=17%, signal=24%	TIAM1/GAB2/TJP3/ALDH3B1/TIPARP/FASN/MYC/MYOF/INHBB/FARP1/TUBB2B/P2RY2/KRT18/SLC22A5/GFRA1/SFN/NPY1R/SYNGR1/MAST4/CD44/PAPSS2/FLNB/BAG1/TBC1D30/DLC1/HR/TTC39A/TGM2/SLC24A3/CHPT1/KCNK15/MED13L/AR/AFF1/DEPTOR/ESRP2/INPP5F/SLC7A5/KDM4B/CBFA2T3/TMEM164/PODXL/RARA/WFS1/MED24/AMFR/FHL2/NCOR2/TPD52L1/SVIL/SIAH2/ABAT/NAV2/SLC2A1/ITPK1
HALLMARK_HEDGEHOG_SIGNALING	HALLMARK_HEDGEHOG_SIGNALING	35	-0.391	-1.51447	0.0323479	0.115528	0.0851259	4673	tags=46%, list=22%, signal=36%	DPYSL2/TLE3/SLIT1/CDK6/UNC5C/CDK5R1/HEY2/ACHE/NRP2/PML/VLDLR/L1CAM/TLE1/MYH9/HEY1/NRCAM
HALLMARK_FATTY_ACID_METABOLISM	HALLMARK_FATTY_ACID_METABOLISM	155	0.282461	1.3396	0.0427586	0.142529	0.105021	5663	tags=35%, list=26%, signal=26%	HSD17B10/ERP29/MDH1/ACAT2/XIST/LGALS1/ELOVL5/PTS/GSTZ1/SDHD/HSP90AA1/GRHPR/PCBD1/ACADM/MCEE/ECI1/CA6/SDHC/LDHA/INMT/CCDC58/DECR1/HPGD/OSTC/UROS/HMGCS1/MLYCD/NTHL1/MDH2/APEX1/BPHL/LTC4S/TDO2/BCKDHB/SUCLG1/AUH/BLVRA/ALDH3A2/ALDH1A1/CBR3/CBR1/ACSS1/PSME1/ALDH3A1/CD36/IDH1/ADIPOR2/ECH1/MIF/NBN/HSD17B7/SMS/UROD/HAO2/ACOT8
HALLMARK_ADIPOGENESIS	HALLMARK_ADIPOGENESIS	188	0.268255	1.30159	0.0515604	0.161126	0.118725	5015	tags=34%, list=23%, signal=26%	LIFR/NDUFS3/UQCR10/MGST3/MRPL15/FZD4/COX6A1/SCP2/NDUFAB1/ATL2/SAMM50/PREB/DDT/CYC1/COQ5/UQCRQ/CHCHD10/PEMT/NDUFB7/COX7B/UCK1/UBC/ACADM/ESRRA/LAMA4/GPX4/UQCR11/CD302/SDHC/PPARG/DECR1/COX8A/FABP4/JAGN1/RAB34/COQ9/ELMOD3/MDH2/SOD1/NDUFA5/OMD/LTC4S/GPX3/DHRS7/DHRS7B/SUCLG1/ETFB/TANK/PRDX3/ITIH5/AK2/CMBL/CMPK1/CD36/IDH1/ANGPT1/ADIPOR2/MAP4K3/G3BP2/SDHB/ECH1/GPAM/GRPEL1
HALLMARK_REACTIVE_OXIGEN_SPECIES_PATHWAY	HALLMARK_REACTIVE_OXIGEN_SPECIES_PATHWAY	46	0.357735	1.36581	0.0759494	0.219298	0.161588	3287	tags=33%, list=15%, signal=28%	PRDX4/GLRX2/PRDX1/STK25/GLRX/MGST1/ATOX1/NQO1/GPX4/EGLN2/FTL/IPCEF1/NDUFS2/SOD1/GPX3
HALLMARK_G2M_CHECKPOINT	HALLMARK_G2M_CHECKPOINT	191	-0.225657	-1.21901	0.0795455	0.219298	0.161588	3292	tags=21%, list=15%, signal=18%	E2F3/CUL3/MCM3/CHAF1A/TNPO2/POLE/HMGB3/HNRNPD/KPNB1/UBE2C/SLC7A1/PML/RBM14/NOLC1/RPS6KA5/CBX1/MARCKS/SMC1A/GSPT1/SYNCRIP/FOXN3/SQLE/KIF23/SLC7A5/STMN1/ODF2/HIRA/MKI67/EWSR1/AURKB/HIF1A/PAFAH1B1/NASP/UPF1/HNRNPU/INCENP/TFDP1/NUP98/TOP1/E2F2
HALLMARK_MYC_TARGETS_V2	HALLMARK_MYC_TARGETS_V2	58	0.33427	1.34007	0.0833333	0.219298	0.161588	5084	tags=36%, list=24%, signal=28%	PHB/DCTPP1/CDK4/TBRG4/RABEPK/HSPE1/NOP16/NDUFAF4/PUS1/SRM/IMP4/MRTO4/EXOSC5/NPM1/WDR74/WDR43/TMEM97/CBX3/MPHOSPH10/TFB2M/DUSP2
HALLMARK_MTORC1_SIGNALING	HALLMARK_MTORC1_SIGNALING	193	0.252158	1.22865	0.0947931	0.236983	0.174619	2825	tags=20%, list=13%, signal=17%	PSMB5/PSMA3/PPIA/CCNG1/PSMC2/TPI1/PSMA4/PSMD14/PPA1/M6PR/TBK1/CACYBP/PRDX1/ELOVL5/COPS5/GLRX/EBP/PGK1/SEC11A/YKT6/CANX/GTF2H1/RPN1/CTSC/GAPDH/TUBA4A/DAPP1/NUFIP1/POLR3G/MTHFD2L/HSPE1/SLC7A11/LDHA/ARPC5L/FKBP2/UCHL5/HMGCS1/CCT6A
HALLMARK_BILE_ACID_METABOLISM	HALLMARK_BILE_ACID_METABOLISM	112	0.273244	1.24391	0.110482	0.263051	0.193827	4839	tags=32%, list=23%, signal=25%	PEX11G/SCP2/CH25H/PEX19/PNPLA8/SLCO1A2/GSTK1/PECR/PEX16/SLC23A1/SLC27A5/GNPAT/LCK/MLYCD/ISOC1/CYP7A1/ABCA3/SOD1/PEX11A/IDH2/HSD3B1/GC/PAOX/CYP39A1/SULT1B1/SULT2B1/ALDH1A1/SLC35B2/CYP46A1/PEX6/IDH1/CROT/SLC27A2/PRDX5/TFCP2L1/HAO1
HALLMARK_COAGULATION	HALLMARK_COAGULATION	137	-0.228965	-1.1802	0.119718	0.272087	0.200485	2857	tags=36%, list=13%, signal=32%	CFH/DCT/USP11/COMP/RAC1/CAPN2/THBD/SERPINA1/FBN1/SERPINC1/HTRA1/ARF4/THBS1/F10/PROC/GDA/KLF7/SH2B2/SIRT2/CLU/F13B/PF4/PREP/PLAT/CTSB/F11/P2RY1/F3/ISCU/MASP2/WDR1/OLR1/MMP1/CASP9/CTSE/PECAM1/GP9/FGA/GNG12/MMP15/CAPN5/MMP9/VWF/GSN/GP1BA/ITGB3/FURIN/MSRB2/F9/SPARC
HALLMARK_PEROXISOME	HALLMARK_PEROXISOME	102	0.272171	1.21854	0.146413	0.318289	0.234529	6506	tags=43%, list=30%, signal=30%	PEX2/SCP2/PRDX1/ELOVL5/GSTK1/HRAS/CNBP/ERCC1/TSPO/GNPAT/PEX11B/ERCC3/MLYCD/ISOC1/SLC25A19/SOD1/MSH2/ABCB1/PEX11A/IDH2/SLC25A17/ITGB1BP1/SEMA3C/SLC25A4/SULT2B1/ALDH1A1/SLC35B2/PEX6/IDH1/SLC27A2/PRDX5/ECH1/ABCD2/HAO2/PEX5/ACOT8/CLN8/FIS1/STS/VPS4B/HSD11B2/ECI2/HMGCL/TTR
HALLMARK_E2F_TARGETS	HALLMARK_E2F_TARGETS	194	0.234636	1.14376	0.191176	0.39708	0.292585	6510	tags=36%, list=30%, signal=25%	POLE4/PHF5A/PRDX4/ASF1A/NUDT21/NME1/NAA38/DCTPP1/CDK4/DUT/RAD1/RPA3/TBRG4/LYAR/RAD51C/RANBP1/CDKN3/ANP32E/TRA2B/RAN/RPA2/ILF3/CDKN1B/BRMS1L/PMS2/CSE1L/EXOSC8/PRKDC/SMC6/MSH2/PDS5B/CENPE/PRPS1/HUS1/BARD1/PCNA/POLD2/SRSF2/CDCA3/AK2/MMS22L/CHEK2/TUBB/STAG1/CDC25A/DDX39A/SMC3/DSCC1/HMGA1/PRIM2/NBN/CKS1B/RRM2/MXD3/TMPO/SNRPB/PPP1R8/GINS1/HMMR/MTHFD2/LUC7L3/PSIP1/HMGB2/NAP1L1/CENPM/IPO7/TFRC/PAICS/SPC24
HALLMARK_PROTEIN_SECRETION	HALLMARK_PROTEIN_SECRETION	95	0.263868	1.16753	0.19854	0.39708	0.292585	5668	tags=35%, list=26%, signal=26%	RER1/M6PR/ERGIC3/YKT6/VPS45/VAMP4/RPS6KA3/CTSC/EGFR/ANP32E/RAB2A/SNX2/SOD1/USO1/TMED2/ATP6V1H/TMX1/LMAN1/CD63/VAMP3/BNIP3/TMED10/CLTA/VAMP7/COPE/NAPG/BET1/AP3S1/ARF1/GALC/STX7/LAMP2/TOM1L1
HALLMARK_ANDROGEN_RESPONSE	HALLMARK_ANDROGEN_RESPONSE	97	0.25069	1.11105	0.277941	0.515516	0.379854	4738	tags=28%, list=22%, signal=22%	LIFR/B2M/ELOVL5/HOMER2/UAP1/SRP19/SPCS3/DBI/RPS6KA3/TNFAIP8/SLC38A2/KRT8/HPGD/ELK4/MAP7/INPP4B/HMGCS1/SAT1/XRCC5/ARID5B/ITGAV/TMEM50A/LMAN1/CDC14B/CCND3/KLK3/ABCC4
HALLMARK_APICAL_SURFACE	HALLMARK_APICAL_SURFACE	43	-0.27913	-1.13065	0.278378	0.515516	0.379854	6792	tags=49%, list=32%, signal=33%	AFAP1L2/MDGA1/B4GALT1/LYN/PLAUR/GAS1/SLC34A3/BRCA1/SCUBE1/FLOT2/ATP8B1/IL2RG/TMEM8B/SLC22A12/EPHB4/PKHD1/APP/NCOA6/GATA3/SULF2/HSPB1
HALLMARK_IL2_STAT5_SIGNALING	HALLMARK_IL2_STAT5_SIGNALING	194	0.220897	1.07679	0.30615	0.546696	0.402829	6105	tags=33%, list=28%, signal=24%	TNFRSF18/SYNGR2/BATF/GSTO1/BATF3/LIF/PTRH2/COCH/CD79B/TTC39B/HOPX/AHNAK/CAPG/CSF1/LCLAT1/SLC39A8/CASP3/ETV4/GPX4/CST7/TNFSF10/ICOS/AHR/PUS1/RHOH/ALCAM/PHTF2/CD48/GPR65/PTH1R/ABCB1/IKZF2/GPR83/CD81/ITGAV/RABGAP1L/PTGER2/TNFSF11/ITIH5/MAFF/FLT3LG/CDC42SE2/NRP1/PDCD2L/CCND3/CAPN3/SERPINB6/ST3GAL4/ENPP1/MAPKAPK2/SNX14/BCL2/IRF4/PLEC/XBP1/IL2RA/SCN9A/IFNGR1/NOP2/IL13/UCK2/S100A1/ECM1/TNFRSF9
HALLMARK_KRAS_SIGNALING_UP	HALLMARK_KRAS_SIGNALING_UP	194	-0.188793	-1.02087	0.377953	0.643283	0.473998	4547	tags=25%, list=21%, signal=20%	MAFB/ADAM17/PCSK1N/AMMECR1/SPRY2/GALNT3/IL2RG/IKZF1/ANGPTL4/PLAT/ADGRL4/EMP1/PIGR/CBX8/F2RL1/HKDC1/PTCD2/PLVAP/PRKG2/PLEK2/RBP4/TNNT2/SOX9/GADD45G/CXCR4/MPZL2/KIF5C/CDADC1/PECAM1/ACE/BPGM/SNAP91/MMP9/ENG/RGS16/SCG3/TNFRSF1B/IGF2/WDR33/PEG3/CA2/CFHR2/ITGB2/AVL9/FGF9/F13A1/ANKH/TMEM158
HALLMARK_UNFOLDED_PROTEIN_RESPONSE	HALLMARK_UNFOLDED_PROTEIN_RESPONSE	106	0.229487	1.03177	0.393939	0.643283	0.473998	5906	tags=39%, list=28%, signal=28%	EXOSC1/RPS14/EIF4EBP1/PREB/SLC30A5/SEC11A/SPCS3/EXOSC2/LSM1/LSM4/SPCS1/EEF2/POP4/SRPRB/EIF4A1/ZBTB17/EXOSC5/NHP2/PDIA5/ATF4/NPM1/BAG3/ARFGAP1/NFYB/EIF4A2/IMP3/EIF4E/FKBP14/YIF1A/YWHAZ/EXOSC9/PSAT1/DDIT4/CKS1B/XBP1/KIF5B/DCP2/MTHFD2/PAIP1/KDELR3/CEBPG
HALLMARK_INTERFERON_ALPHA_RESPONSE	HALLMARK_INTERFERON_ALPHA_RESPONSE	92	0.232526	1.02259	0.398836	0.643283	0.473998	2380	tags=12%, list=11%, signal=11%	PSMA3/B2M/SLC25A28/LPAR6/PSMB8/MOV10/CSF1/PSMB9/BST2/CASP1/CD47
HALLMARK_PANCREAS_BETA_CELLS	HALLMARK_PANCREAS_BETA_CELLS	40	0.26609	0.983363	0.493569	0.771202	0.568254	2423	tags=18%, list=11%, signal=16%	SRP14/SST/PDX1/SEC11A/SPCS1/SRPRB/DCX
HALLMARK_XENOBIOTIC_METABOLISM	HALLMARK_XENOBIOTIC_METABOLISM	196	-0.179022	-0.970085	0.515748	0.781436	0.575795	3601	tags=21%, list=17%, signal=18%	UGDH/CYP27A1/LPIN2/F11/ARG2/PGRMC1/CYP17A1/SLC6A12/RBP4/SLC1A5/PAPSS2/HMOX1/MTHFD1/FBP1/AOX1/SSR3/PTGES3/HES6/SERPINA6/AP4B1/GART/NDRG2/ACOX1/ABCC3/CYP2C18/PC/ADH1C/CDO1/ATP2A2/ACO2/RAP1GAP/APOE/SLC22A1/ESR1/TTPA/SMOX/CA2/GCLC/MAOA/NFS1/GAD1
HALLMARK_GLYCOLYSIS	HALLMARK_GLYCOLYSIS	197	-0.177171	-0.964169	0.533333	0.784314	0.577915	5216	tags=29%, list=24%, signal=22%	PGAM2/DSC2/PLOD2/CHPF/TGFBI/IDUA/CLN6/PAXIP1/ABCB6/GAL3ST1/PAM/GOT2/HSPA5/PGM2/COL5A1/DPYSL4/ANGPTL4/HOMER1/ECD/EFNA3/SDC2/GOT1/PYGL/GMPPA/EXT2/GNE/GFPT1/SLC35A3/CD44/SOX9/SDC3/CXCR4/ARTN/GPC1/GUSB/VLDLR/CHST2/ALG1/MXI1/PC/PFKFB1/HK2/CHST1/SLC25A10/CAPN5/STMN1/PPFIA4/CLDN3/HS2ST1/GPC3/TALDO1/MED24/GCLC/AK3/NASP/QSOX1/CHST6/MIOX
HALLMARK_UV_RESPONSE_UP	HALLMARK_UV_RESPONSE_UP	151	0.201248	0.949427	0.570236	0.811338	0.597828	5024	tags=26%, list=23%, signal=20%	SHOX2/MRPL23/ATP6V1F/PPP1R2/KLHDC3/STK25/PSMC3/OLFM1/HLA-F/NAT1/YKT6/SIGMAR1/RPN1/FKBP4/E2F5/CASP3/TUBA4A/NTRK3/BAK1/IL6ST/MGAT1/ABCB1/RRAD/GPX3/NXF1/SPR/BTG2/SLC25A4/AMD1/FEN1/RXRB/BID/TMBIM6/CCND3/RFC4/DNAJA1/BTG1/GRPEL1/ARRB2
HALLMARK_PI3K_AKT_MTOR_SIGNALING	HALLMARK_PI3K_AKT_MTOR_SIGNALING	103	0.206466	0.926604	0.598837	0.811338	0.597828	4937	tags=28%, list=23%, signal=22%	PIN1/TBK1/CDK4/ITPR2/RPS6KA3/EGFR/CAB39L/FGF22/MAPK8/DAPP1/HRAS/MAPK9/CDKN1B/ADCY2/LCK/PRKAG1/UBE2N/MYD88/PLA2G12A/PPP2R1B/DUSP3/NFKBIB/CAMK4/PTEN/EIF4E/RAF1/DDIT3/CFL1/ARF1
HALLMARK_NOTCH_SIGNALING	HALLMARK_NOTCH_SIGNALING	32	-0.236741	-0.910103	0.612745	0.811338	0.597828	4263	tags=34%, list=20%, signal=28%	FZD5/DLL1/WNT2/MAML2/FZD1/PRKCA/LFNG/NOTCH3/NOTCH1/HEYL/DTX4
HALLMARK_SPERMATOGENESIS	HALLMARK_SPERMATOGENESIS	132	-0.183042	-0.939121	0.623239	0.811338	0.597828	5532	tags=30%, list=26%, signal=23%	ZNRF4/AURKA/YBX2/EZH2/COIL/IL13RA2/PARP2/CFTR/RAD17/ZC3H14/BUB1/DPEP3/PCSK1N/PCSK4/HSPA2/DMRT1/OAZ3/ZPBP/GMCL1/ACRBP/TLE4/HBZ/IP6K1/IFT88/JAM3/CNIH2/ART3/ACE/PDHA2/NEFH/SNAP91/SCG3/NF2/TALDO1/SHE/TNP2/GAD1/MTNR1A/TNNI3/SPATA6
HALLMARK_P53_PATHWAY	HALLMARK_P53_PATHWAY	193	0.190334	0.927409	0.632844	0.811338	0.597828	5517	tags=28%, list=26%, signal=21%	DDB2/CCNG1/RPL18/RPL36/LIF/HINT1/VAMP8/WRAP73/CDH13/RAD51C/EI24/PRMT2/FAM162A/IER3/CEBPA/PTPN14/HRAS/NOL8/SLC7A11/LDHB/RPS27L/CASP1/HEXIM1/CGRRF1/BAK1/DNTTIP2/MAPKAPK3/VWA5A/F2R/RRAD/PCNA/CD81/SAT1/BTG2/S100A4/TPRKB/MXD4/PMM1/JAG2/UPP1/RAP2B/AEN/OSGIN1/CCND3/DDIT3/DGKA/FAS/BTG1/DCXR/DDIT4/RALGDS/TM7SF3/CYFIP2/ZNF365/RAD9A
HALLMARK_INTERFERON_GAMMA_RESPONSE	HALLMARK_INTERFERON_GAMMA_RESPONSE	195	0.18801	0.916894	0.655541	0.819426	0.603788	7047	tags=31%, list=33%, signal=21%	PSMA3/STAT4/PSMA2/HLA-DQA1/HLA-DMA/B2M/PTPN2/GZMA/SLC25A28/KLRK1/VAMP8/PSMB8/GPR18/CASP3/PSMB9/XCL1/TNFSF10/BST2/CASP1/CMKLR1/RBCK1/VAMP5/ISOC1/CXCL9/MYD88/APOL6/ARID5B/CD69/TNFAIP6/PSME1/CCL5/UPP1/SRI/GBP6/FAS/BTG1/CD40/PTGS2/IRF4/SPPL2A/CASP8/IL15RA/LYSMD2/MTHFD2/SLAMF7/CD74/CD274/CASP4/IDO1/CXCL10/GCH1/PSME2/RIPK2/PSMB10/IL4R/HLA-DRB1/IRF1/VCAM1/IFITM2/TRIM21/CDKN1A
HALLMARK_APOPTOSIS	HALLMARK_APOPTOSIS	158	-0.16999	-0.89327	0.744526	0.907958	0.669022	1581	tags=12%, list=7%, signal=11%	ATF3/BGN/RELA/CASP7/NEFH/PPP2R5B/BCL2L11/PPP3R1/DNM1L/APP/LMNA/GSN/RARA/CREBBP/XIAP/ANKH/ERBB3/TIMP2/HSPB1
HALLMARK_ANGIOGENESIS	HALLMARK_ANGIOGENESIS	36	0.224764	0.811549	0.76509	0.910821	0.671131	4468	tags=25%, list=21%, signal=20%	VTN/SLCO2A1/LUM/SERPINA5/ITGAV/S100A4/TIMP1/JAG2/NRP1
HALLMARK_COMPLEMENT	HALLMARK_COMPLEMENT	196	0.173806	0.847977	0.818182	0.951374	0.701013	6534	tags=30%, list=30%, signal=21%	GZMK/GZMA/GNGT2/GMFB/CTSH/S100A9/DOCK9/ADAM9/CDH13/S100A12/CTSC/CASP3/DYRK2/ATOX1/PSMB9/PPP2CB/ERAP2/DGKH/PCSK9/PCLO/CASP1/LCK/CASP10/CP/APOBEC3G/RHOG/C1QA/PIK3CA/TIMP1/MAFF/GZMB/APOBEC3F/APOA4/GNG2/KCNIP3/CCL5/FN1/KCNIP2/CD36/RAF1/F8/CASP5/SIRT6/C1QC/GCA/CTSV/USP16/USP15/LAMP2/PIK3CG/ZFPM2/PSEN1/CASP4/GRB2/CSRP1/LTA4H/NOTCH4/ADRA2B/PPP4C
HALLMARK_KRAS_SIGNALING_DN	HALLMARK_KRAS_SIGNALING_DN	186	-0.154315	-0.829374	0.924812	1	0.736842	5446	tags=27%, list=25%, signal=21%	PCDHB1/SYNPO/YBX2/SLC25A23/CLPS/IGFBP2/CD80/IDUA/MFSD6/CHRNG/AMBN/SSTR4/SPRR3/KRT4/SLC30A3/KCNQ2/PRODH/SGK1/TSHB/CDKAL1/NR6A1/SCGB1A1/UPK3B/NUDT11/P2RY4/ITIH3/MEFV/NPHS1/BRDT/HNF1A/GPR3/CAMK1D/MYOT/PTPRJ/CHST2/KRT5/PKP1/PDK2/LFNG/CALML5/AKR1B10/KRT1/RGS11/CLDN16/GP1BA/TCF7L1/MYH7/THRB/ACTC1/TNNI3/SPTBN2
HALLMARK_ESTROGEN_RESPONSE_LATE	HALLMARK_ESTROGEN_RESPONSE_LATE	195	0.153762	0.749874	0.965287	1	0.736842	5455	tags=25%, list=25%, signal=19%	RABEP1/KLK10/BATF/NXT1/ELOVL5/HOMER2/S100A9/OLFM1/MOCS2/COX6C/FKBP4/ASCL1/KRT13/TRIM29/DNAJC1/MAPK13/IL6ST/NRIP1/ID2/SERPINA5/FGFR3/ABCA3/OPN3/JAK1/IDH2/CYP4F11/SLC2A8/RBBP8/STIL/EMP2/ETFB/DYNLT3/ALDH3A2/AREG/SULT2B1/RAB31/XRCC3/GALE/IGFBP4/SLC27A2/CYP26B1/LLGL2/DCXR/DUSP2/BCL2/CCND1/FOXC1/PLXNB1/XBP1
HALLMARK_TNFA_SIGNALING_VIA_NFKB	HALLMARK_TNFA_SIGNALING_VIA_NFKB	197	-0.142924	-0.777796	0.968627	1	0.736842	7007	tags=37%, list=33%, signal=25%	RHOB/TNIP1/CCRL2/CEBPB/ICOSLG/PPP1R15A/IER5/TLR2/DDX58/B4GALT1/RELB/CCL2/PHLDA1/IL6/PTGER4/PLAUR/TNFAIP2/MXD1/NFAT5/LDLR/TNFSF9/SPHK1/GADD45A/DENND5A/PTPRE/SDC4/JUNB/TRAF1/SIK1/CD80/B4GALT5/NFKB1/NFKB2/PTX3/EGR2/TIPARP/SGK1/BCL6/MYC/NFIL3/SMAD3/CXCL1/EIF1/FUT4/CFLAR/F2RL1/GEM/FOSB/PMEPA1/KLF2/PNRC1/CD44/F3/ICAM1/OLR1/KDM6B/NFKBIA/MARCKS/PANX1/PHLDA2/TUBB2A/ATF3/CXCL6/RELA/CEBPD/EHD1/TSC22D1/PER1/…
HALLMARK_CHOLESTEROL_HOMEOSTASIS	HALLMARK_CHOLESTEROL_HOMEOSTASIS	72	-0.149693	-0.683951	0.982609	1	0.736842	5009	tags=42%, list=23%, signal=32%	CD9/NSDHL/ANXA13/MAL2/DHCR7/PLSCR1/SREBF2/PLAUR/CHKA/LDLR/SEMA3B/AVPR1A/CLU/FADS2/ACTG1/FASN/NFIL3/CBS/ADH4/CTNNB1/PCYT2/PNRC1/CXCL16/GUSB/ANTXR2/ATF3/SQLE/ATXN2/ABCA2/FABP5
HALLMARK_EPITHELIAL_MESENCHYMAL_TRANSITION	HALLMARK_EPITHELIAL_MESENCHYMAL_TRANSITION	197	-0.135519	-0.737495	0.992157	1	0.736842	7091	tags=38%, list=33%, signal=25%	BASP1/LAMC1/RHOB/NID2/COL4A1/SFRP1/FBLN2/FAP/COMP/SDC1/COL6A3/RGS4/ACTA2/MFAP5/IL6/FBN1/PLAUR/HTRA1/THBS1/COL5A3/ENO2/CALD1/FZD8/GADD45A/POSTN/ITGB5/GAS1/SGCB/MCM7/TPM4/SDC4/EDIL3/PLOD2/IGFBP2/TGFBI/SFRP4/TGFBR3/CDH2/ADAM12/MAGEE1/PTX3/LAMA2/COL5A1/MYL9/CXCL1/ANPEP/SLIT3/GEM/PLOD3/SERPINH1/PMEPA1/FLNA/CD44/LOXL2/ELN/MMP1/TGM2/GPC1/FOXC2/TPM2/DAB2/BGN/CXCL6/DPYSL3/SLC6A8/DST/TNFRSF11B/ITGB3/COPA/Q…
HALLMARK_INFLAMMATORY_RESPONSE	HALLMARK_INFLAMMATORY_RESPONSE	198	-0.12608	-0.686376	0.996047	1	0.736842	6516	tags=32%, list=30%, signal=22%	PROK2/ICAM4/LYN/CCL2/TLR1/CD14/IL6/CCL7/PTGER4/PLAUR/MXD1/PDPN/LDLR/CCL22/TNFSF9/SPHK1/AXL/FZD5/PTPRE/CSF3/KCNA3/GNA15/ATP2C1/NFKB1/CCL24/GABBR1/MYC/NLRP3/NOD2/OSMR/KIF1B/LCP2/GNAI3/P2RY2/TAPBP/MEFV/GPR132/HRH1/RGS1/ACVR1B/F3/ICAM1/HAS2/OLR1/SLC7A1/CHST2/NFKBIA/C5AR1/IRAK2/CXCL6/RELA/OPRK1/ATP2A2/CCL17/PTAFR/RGS16/TNFRSF1B/GPC3/ABCA1/HIF1A/GP1BA/ITGB3/SEMA4D
HALLMARK_IL6_JAK_STAT3_SIGNALING	HALLMARK_IL6_JAK_STAT3_SIGNALING	87	0.11508	0.498119	1	1	0.736842	8290	tags=38%, list=39%, signal=23%	HAX1/PTPN2/REG1A/CSF1/TNFRSF12A/ITGA4/BAK1/IL6ST/CXCL9/MYD88/CD36/IL13RA1/FAS/IL2RA/IL15RA/IFNGR1/PTPN11/GRB2/CXCL10/CXCL13/IL4R/IRF1/IL18R1/IL12RB1/SOCS3/IL9R/LTBR/CXCL11/TNF/IFNGR2/IL10RB/STAM2/CSF2RA

## Sheet: SA vitamin D2
ID	Description	setSize	enrichmentScore	NES	pvalue	p.adjust	qvalues	rank	leading_edge	core_enrichment
HALLMARK_G2M_CHECKPOINT	HALLMARK_G2M_CHECKPOINT	191	-0.507869	-2.4606	2.91569e-15	1.45784e-13	9.20743e-14	4415	tags=47%, list=21%, signal=37%	CHAF1A/NEK2/MYC/CDC25B/TRA2B/MEIS2/TTK/UPF1/CDKN1B/ABL1/KIF5B/INCENP/STIL/KIF11/NASP/KIF20B/MCM2/BUB1/SS18/CUL5/HNRNPU/RBM14/TACC3/MTF2/BARD1/NUP50/CDKN3/HIRA/FBXO5/DR1/E2F3/TPX2/PRPF4B/CENPF/SLC7A1/MKI67/CDC27/PURA/SMC2/KNL1/SFPQ/NDC80/MCM6/RAD23B/KIF22/HMGN2/CCNT1/TOP2A/HSPA8/CUL4A/CENPE/KPNB1/SRSF10/PLK1/MCM5/SLC38A1/MYBL2/ILF3/SYNCRIP/DKC1/SRSF2/BUB3/DBF4/LBR/SMC4/MARCKS/NUMA1/KIF4A/SMC1A/G3B…
HALLMARK_MITOTIC_SPINDLE	HALLMARK_MITOTIC_SPINDLE	197	-0.491175	-2.38634	7.92097e-15	1.98024e-13	1.25068e-13	4959	tags=52%, list=23%, signal=40%	PKD2/STAU1/ARAP3/CCNB2/RHOT2/RASAL2/RICTOR/GEMIN4/WASL/CSNK1D/DST/CEP57/SASS6/ARHGEF3/NEK2/DLGAP5/KNTC1/TAOK2/MAPRE1/TTK/CAPZB/MYO1E/ABL1/KIF5B/INCENP/ARHGEF7/KIF11/SSH2/KIF20B/ABI1/NCK2/HOOK3/BUB1/BCAR1/CTTN/NIN/HDAC6/RANBP9/PREX1/PIF1/SUN2/TLK1/CNTRL/FBXO5/ARHGEF12/MAP3K11/TPX2/CENPF/CDC27/ARF6/LRPPRC/PCNT/SOS1/TSC1/CEP72/TBCD/ARHGAP4/NDC80/KIF22/CDK5RAP2/RALBP1/ROCK1/CEP250/KIFAP3/MID1/TOP2A/G…
HALLMARK_E2F_TARGETS	HALLMARK_E2F_TARGETS	194	-0.472147	-2.28984	1.57198e-12	2.61997e-11	1.65472e-11	4421	tags=43%, list=21%, signal=35%	DEPDC1/MCM4/MYC/CDC25B/DLGAP5/TRA2B/RPA3/SPC25/GINS1/ASF1B/EXOSC8/SLBP/CDKN1B/CDCA3/NASP/MCM2/EED/ATAD2/TACC3/BARD1/ZW10/NOP56/CDKN3/NUDT21/DEK/CDCA8/MSH2/MKI67/TFRC/RAN/HMGB2/MMS22L/RRM2/LUC7L3/MCM6/NAP1L1/KIF22/USP1/CIT/PRPS1/TOP2A/ANP32E/RFC3/CENPE/PSIP1/RAD50/PLK1/PPP1R8/MCM5/MYBL2/ILF3/SPAG5/SYNCRIP/SRSF2/MELK/LBR/SMC4/POLD3/MCM7/NUP107/NUP205/UBR7/KIF4A/DIAPH3/SMC1A/RBBP7/DDX39A/NOLC1/PPM1D…
HALLMARK_UNFOLDED_PROTEIN_RESPONSE	HALLMARK_UNFOLDED_PROTEIN_RESPONSE	106	-0.51855	-2.30229	1.02335e-09	1.27918e-08	8.07904e-09	5021	tags=51%, list=23%, signal=39%	WIPI1/SEC11A/EEF2/GEMIN4/DCTN1/CNOT4/ZBTB17/PAIP1/ASNS/KIF5B/CALR/ATP6V0D1/EIF4E/SPCS1/SRPRB/SPCS3/EXOSC9/BAG3/DCP2/NOP56/CNOT6/EDC4/WFS1/TSPYL2/EXOC2/SERP1/CHAC1/EIF4A2/CEBPG/ATF4/HYOU1/DDX10/EXOSC10/FUS/NOP14/PSAT1/PDIA6/KHSRP/DKC1/SDAD1/SEC31A/DNAJB9/CNOT2/EXOSC2/PDIA5/DCP1A/NPM1/SSR1/NOLC1/HERPUD1/YWHAZ/EIF4A3/XBP1/HSP90B1
HALLMARK_PROTEIN_SECRETION	HALLMARK_PROTEIN_SECRETION	95	-0.492423	-2.15333	1.51519e-07	1.51519e-06	9.56965e-07	5365	tags=51%, list=25%, signal=38%	RAB9A/RAB22A/MAPK1/TMX1/COPE/IGF2R/AP2B1/ADAM10/DST/CLCN3/TSG101/RAB14/LAMP2/TMED2/ARCN1/STX12/VAMP7/NAPG/LMAN1/ZW10/GOLGA4/SGMS1/PPT1/DNM1L/TMED10/SNX2/ARFGAP3/ANP32E/COPB1/AP3B1/SCAMP3/ARFGEF2/PAM/SEC31A/SCRN1/ARFIP1/VPS4B/GBF1/RPS6KA3/KIF1B/COPB2/RAB5A/GNAS/USO1/SSPN/ARFGEF1/CTSC/ATP1A1
HALLMARK_MTORC1_SIGNALING	HALLMARK_MTORC1_SIGNALING	193	-0.411379	-1.99589	1.90821e-07	1.59017e-06	1.00432e-06	5158	tags=40%, list=24%, signal=31%	ATP2A2/GLRX/PSMD13/INSIG1/POLR3G/SEC11A/MLLT11/CD9/TMEM97/STARD4/PSMC2/HMGCS1/MCM4/PHGDH/EGLN3/ASNS/ACSL3/HPRT1/CALR/PSMD14/DAPP1/NFIL3/LDLR/TOMM40/MCM2/BUB1/GOT1/IFRD1/ADIPOR2/NAMPT/SKAP2/PSME3/ITGB2/SERP1/TFRC/ALDOA/RRM2/ACACA/GBE1/DHFR/PDK1/GTF2H1/PPA1/ME1/ADD3/LDHA/PLK1/ENO1/PIK3R3/NFKBIB/G6PD/SLA/PSAT1/CORO1A/RAB1A/NUP205/HSPD1/LGMN/DDX39A/CANX/PGM1/SSR1/GMPS/CXCR4/SLC9A3R1/USO1/HMGCR/GPI/CT…
HALLMARK_MYC_TARGETS_V1	HALLMARK_MYC_TARGETS_V1	193	-0.391369	-1.8988	2.55554e-06	1.62267e-05	1.02484e-05	7229	tags=58%, list=34%, signal=38%	SLC25A3/GNL3/PABPC1/VDAC1/STARD7/CBX3/PABPC4/IMPDH2/CCT3/NDUFAB1/EIF4A1/CDC45/U2AF1/ETF1/EEF1B2/CUL1/EIF3J/PSMC4/MRPL9/PSMA6/PGK1/CCT2/HDDC2/XPO1/VDAC3/TYMS/SRM/SNRPD1/PSMA4/RPS2/PPM1G/CCT7/SNRPA/SRPK1/EIF3B/PRDX3/FBL/MRPS18B/C1QBP/RPS10/MCM4/MYC/TRA2B/AIMP2/TRIM28/HPRT1/PSMA1/CLNS1A/PSMD14/EIF4E/MCM2/GLO1/HNRNPU/PCBP1/RPL6/IFRD1/HNRNPR/NOP56/RPS6/DEK/SET/SF3B3/POLE3/HDAC2/RPS5/CSTF2/RAN/PSMD7/SR…
HALLMARK_UV_RESPONSE_DN	HALLMARK_UV_RESPONSE_DN	139	-0.417835	-1.93722	2.59627e-06	1.62267e-05	1.02484e-05	4781	tags=39%, list=22%, signal=30%	CITED2/LAMC1/NFKB1/DYRK1A/GRK5/MYC/CDKN1B/NRP1/PMP22/NR1D2/LDLR/AGGF1/SLC22A18/DDAH1/ID1/GJA1/KIT/CELF2/DBP/APBB2/CDK13/SLC7A1/MIOS/PIK3CD/ARHGEF9/BMPR1A/PTPRM/SIPA1L1/TGFBR2/WDR37/PTEN/LPAR1/NR3C1/ADD3/ATRN/COL11A1/PIK3R3/RUNX1/CAV1/ANXA4/PIAS3/PRKCA/PTPN21/SYNJ2/FYN/ATP2B1/SCAF8/SMAD3/ZMIZ1/NOTCH2/ATP2B4/ATRX/SYNE1/PHF3
HALLMARK_ALLOGRAFT_REJECTION	HALLMARK_ALLOGRAFT_REJECTION	195	-0.335431	-1.62607	0.000517414	0.00287452	0.00181549	6265	tags=41%, list=29%, signal=29%	LTB/PRF1/IL4R/ZAP70/TLR2/CD47/THY1/CXCL13/CD3G/CD7/CD1D/FGR/IL10/CD2/CCL19/RPL39/ICOSLG/LCK/MAP4K1/TRAF2/IL12A/HIF1A/BRCA1/RPS19/RPL9/IFNGR1/ETS1/CD40LG/MBL2/HLA-G/LYN/HLA-DMA/RIPK2/ITK/HLA-DQA1/LIF/HLA-DOA/EIF4G3/ABI1/IL27RA/MMP9/IL2RB/CD3E/IL18RAP/CCND2/RPS3A/SPI1/ELF4/IL6/ITGB2/TAP2/FAS/ST8SIA4/CCR2/IL15/IRF4/LY75/HLA-E/CD8A/LCP2/ITGAL/FLNA/IL2RG/CXCR3/PTPN6/PRKCB/ABCE1/CD28/MAP3K7/TAPBP/CD74/…
HALLMARK_APOPTOSIS	HALLMARK_APOPTOSIS	158	-0.345954	-1.64008	0.000842866	0.00421433	0.00266168	4898	tags=37%, list=23%, signal=29%	CYLD/CD2/PSEN1/BID/GSTM1/SLC20A1/IGF2R/RETSAT/RHOT2/BRCA1/IFNGR1/ANXA1/GUCY2D/CREBBP/CDC25B/CDKN1B/CASP7/VDAC2/BCAP31/MADD/CTNNB1/MCL1/PLCB2/CCND2/DPYD/IL6/APP/FAS/EMP1/PPT1/BAX/HMGB2/DNM1L/CD38/PAK1/DAP3/BIRC3/CD14/ROCK1/TOP2A/DCN/GSN/ADD1/RNASEL/CAV1/CASP3/TXNIP/NEFH/LMNA/TIMP2/AVPR1A/PDCD4/JUN/BTG2/CD44/LEF1/SPTAN1/LUM/SATB1
HALLMARK_KRAS_SIGNALING_UP	HALLMARK_KRAS_SIGNALING_UP	194	-0.293792	-1.42485	0.00708193	0.0321906	0.0203309	3881	tags=32%, list=18%, signal=26%	MAP4K1/AKAP12/IKZF1/BTC/TMEM176A/RABGAP1L/ADAMDEC1/GLRX/ENG/ETS1/ETV5/CD37/PCP4/NRP1/LIF/PLAU/KCNN4/KIF5C/BTBD3/NIN/LAPTM5/DNMBP/JUP/MMP9/CBR4/PRDM1/CCL20/CCND2/DCBLD2/IL10RA/F13A1/SCG5/ITGB2/SCG3/EMP1/FUCA1/SPON1/MAP3K1/BIRC3/SPRY2/ZNF639/MMP10/PIGR/IL2RG/DUSP6/MMD/VWA5A/MPZL2/PTCD2/PECAM1/DOCK2/LCP1/MTMR10/ADAM8/CXCR4/ABCB1/ST6GAL1/TRIB1/SNAP91/CFH/SATB1/ETV1
HALLMARK_IL2_STAT5_SIGNALING	HALLMARK_IL2_STAT5_SIGNALING	194	-0.288438	-1.39888	0.00945868	0.0394112	0.0248913	6633	tags=41%, list=31%, signal=29%	CAPG/CD83/SHE/CYFIP1/ITIH5/SPRED2/LTB/IL4R/TNFRSF1B/LCLAT1/CKAP4/APLP1/ITGAV/FAM126B/PTCH1/IL3RA/ALCAM/IL10/RORA/FLT3LG/RABGAP1L/AHCY/IGF2R/IFNGR1/RRAGD/TNFRSF21/SOCS2/PHTF2/PUS1/MYC/KLF6/MYO1E/PLIN2/NRP1/NFIL3/ICOS/LIF/CTLA4/MAP6/SNX14/SERPINC1/IRF6/DCPS/PLEC/IL2RB/NDRG1/CCND2/COCH/HIPK2/IL10RA/EMP1/HUWE1/MXD1/CDCP1/GPR83/IRF4/PENK/S100A1/RHOH/F2RL2/DENND5A/AMACR/PRNP/SLC39A8/ANXA4/ITGA6/BCL2/CA…
HALLMARK_PI3K_AKT_MTOR_SIGNALING	HALLMARK_PI3K_AKT_MTOR_SIGNALING	103	-0.344087	-1.5186	0.0109882	0.0422622	0.0266919	4000	tags=30%, list=19%, signal=25%	CDKN1B/CSNK2B/CALR/DAPP1/EIF4E/PTPN11/GRB2/MAPK8/CAB39/CFL1/ACACA/PDK1/PTEN/RIPK1/VAV3/PLCB1/IL2RG/PIK3R3/NFKBIB/ATF1/SLA/PRKCB/MAP3K7/PLCG1/RPTOR/RPS6KA3/TIAM1/CXCR4/YWHAB/ACTR3/HSP90B1
HALLMARK_ANDROGEN_RESPONSE	HALLMARK_ANDROGEN_RESPONSE	97	-0.349366	-1.5343	0.0128054	0.0457337	0.0288845	6078	tags=42%, list=28%, signal=30%	MAF/PIAS1/ITGAV/NKX3-1/CAMKK2/SORD/ACTN1/TSC22D1/AKAP12/DBI/INSIG1/PGM3/HMGCS1/ACSL3/GNAI3/SPCS3/GPD1L/LMAN1/STK39/UBE2J1/NDRG1/ABHD2/SLC26A2/AZGP1/CDK6/NCOA4/ARID5B/TMEM50A/ELL2/PTPN21/DNAJB9/UAP1/RPS6KA3/TNFAIP8/APPBP2/UBE2I/HMGCR/XRCC6/ZMIZ1/NGLY1/SGK1
HALLMARK_COMPLEMENT	HALLMARK_COMPLEMENT	196	-0.286984	-1.39355	0.0140152	0.045998	0.0290514	5646	tags=34%, list=26%, signal=25%	PREP/CTSH/PSEN1/APOA4/ANXA5/LCK/RAF1/VCPIP1/PIK3CA/PCSK9/CD40LG/GNB2/DOCK9/ADAM9/LYN/USP15/LTF/RNF4/LAMP2/RASGRP1/PDGFB/CASP7/GNAI3/HNF4A/GATA3/BRPF3/SERPINC1/GNB4/GNAI2/KIF2A/GPD2/GRB2/CTSD/IL6/SERPINA1/STX4/SCG3/PRCP/CR2/LIPA/CASP10/HSPA1A/ME1/LCP2/PRKCD/SH2B3/DPP4/DUSP6/CXCL1/EHD1/DYRK2/CASP3/FYN/PDP1/CBLB/DGKG/TIMP2/ZEB1/FCN1/LGMN/USP16/SPOCK2/CTSC/ITGAM/DOCK10/LTA4H/CFH
HALLMARK_DNA_REPAIR	HALLMARK_DNA_REPAIR	140	-0.316617	-1.46815	0.0147194	0.045998	0.0290514	4311	tags=30%, list=20%, signal=24%	RNMT/TSG101/RPA3/POLR1C/XPC/TMED2/HPRT1/POM121/DCTN4/DDB1/POLR3GL/SNAPC5/ERCC3/BCAP31/CLP1/AK3/VPS37B/NUDT21/REV3L/SF3A3/DDB2/POLR3C/SEC61A1/PDE4B/POLH/GTF2H1/USP11/POLR2K/RFC3/GMPR2/TAF1C/RFC5/GTF2F1/FEN1/TAF6/POLA1/POLD3/SRSF6/HCLS1/SSRP1/ERCC5/POLR2A
HALLMARK_MYC_TARGETS_V2	HALLMARK_MYC_TARGETS_V2	58	-0.384161	-1.5519	0.0194648	0.0572494	0.0361575	1761	tags=21%, list=8%, signal=19%	RCL1/BYSL/PLK1/MCM5/MPHOSPH10/TCOF1/HSPD1/NPM1/NOLC1/LAS1L/DDX18/HK2
HALLMARK_ESTROGEN_RESPONSE_LATE	HALLMARK_ESTROGEN_RESPONSE_LATE	195	-0.279159	-1.35328	0.0267176	0.0695461	0.0439239	3951	tags=26%, list=18%, signal=22%	HPRT1/RPS6KA2/DYNLT3/FOS/STIL/GALE/KLK10/SERPINA5/FAM102A/SLC29A1/NAB2/UGDH/RAB31/PGR/WFS1/CXCL12/ABHD2/SERPINA1/SLC26A2/SLC24A3/PERP/PPIF/IL6ST/FOXC1/AGR2/TOP2A/ADD3/HR/RAPGEFL1/CAV1/AREG/PTPN6/MAPT/NPY1R/BCL2/ZFP36/ITPK1/GJB3/JAK1/PLXNB1/METTL3/PDCD4/TIAM1/SLC9A3R1/MYB/CD44/PTGER3/SGK1/XBP1/ATP2B4/NCOR2
HALLMARK_ADIPOGENESIS	HALLMARK_ADIPOGENESIS	188	-0.284661	-1.37559	0.0267516	0.0695461	0.0439239	5333	tags=32%, list=25%, signal=25%	LPCAT3/DLAT/ACAA2/POR/BAZ2A/ADIG/BCL6/JAGN1/PRDX3/COQ9/CCNG2/RETSAT/IFNGR1/GHITM/MRAP/HADH/PLIN2/EPHX2/ATL2/GPAM/NDUFA5/ENPP2/TKT/GPD2/ATP1B3/ADIPOR2/ESYT1/DHRS7B/CMBL/CYP4B1/UBC/UCP2/PPM1B/CHUK/SORBS1/ALDOA/BCKDHA/SDHC/G3BP2/GBE1/LPL/STAT5A/ME1/MDH2/PPP1R15B/UBQLN1/APLP2/AIFM1/DNAJB9/ACO2/PDCD4/HIBCH/ADIPOQ/PGM1/SSPN/SLC5A6/REEP5/YWHAG/PTGER3/ACLY/CS
HALLMARK_TGF_BETA_SIGNALING	HALLMARK_TGF_BETA_SIGNALING	54	-0.382542	-1.52732	0.0278184	0.0695461	0.0439239	3474	tags=37%, list=16%, signal=31%	SLC20A1/ENG/SKIL/ARID4B/ID1/CTNNB1/RAB31/RHOA/HIPK2/KLF10/TRIM33/LEFTY2/BMPR1A/MAP3K7/BCAR3/FNTA/HDAC1/WWTR1/SMAD3/NCOR2
HALLMARK_CHOLESTEROL_HOMEOSTASIS	HALLMARK_CHOLESTEROL_HOMEOSTASIS	72	-0.321355	-1.34539	0.0619718	0.147552	0.0931907	6300	tags=39%, list=29%, signal=28%	ACTG1/PDK3/FABP5/ECH1/ALCAM/ANXA5/JAG1/FDFT1/CD9/GUSB/TMEM97/STARD4/GSTM2/HMGCS1/NFIL3/LDLR/FASN/CTNNB1/LPL/ERRFI1/TP53INP1/AVPR1A/LGMN/PNRC1/ATXN2/HMGCR/GLDC/ANTXR2
HALLMARK_FATTY_ACID_METABOLISM	HALLMARK_FATTY_ACID_METABOLISM	155	-0.272725	-1.28869	0.0702211	0.159593	0.100796	7427	tags=44%, list=35%, signal=29%	GCDH/BMPR1B/MIF/ACSL4/GPD1/SLC22A5/IDH3G/ADH7/ACADM/ECI2/DLST/NCAPH2/DECR1/VNN1/OSTC/PDHB/SUCLA2/CD1D/ALDH3A2/MCEE/PTS/LTC4S/ECH1/CPOX/YWHAH/ACAA2/IL4I1/RETSAT/HSP90AA1/AADAT/HMGCS1/HSPH1/IDH3B/ACAA1/HADH/ACADVL/MDH1/ALAD/CA6/CPT1A/FASN/FH/GPD2/HSD17B4/ADIPOR2/UGDH/PDHA1/HADHB/SERINC1/XIST/AUH/ALDOA/ERP29/FMO1/SDHC/ME1/MDH2/LDHA/CCDC58/HSDL2/METAP1/ACSM3/ACO2/ETFDH/SDHA/HIBCH/ACSL5/CRYZ
HALLMARK_HYPOXIA	HALLMARK_HYPOXIA	191	-0.24973	-1.20993	0.0980892	0.213237	0.134676	6522	tags=37%, list=30%, signal=26%	GYS1/IGFBP3/IER3/PGK1/GPC1/PFKFB3/PDK3/HK1/STC2/AMPD3/TES/SLC2A5/PGF/JMJD6/RORA/ALDOB/AKAP12/GLRX/IDS/PFKP/CCNG2/ETS1/CITED2/RRAGD/CHST3/NDST2/SRPX/KLHL24/GAA/KLF6/CDKN1B/PLIN2/PDGFB/UGP2/KDM3A/WSB1/FOS/NFIL3/HDLBP/PPP1R3C/LXN/TGFBI/PKP1/NDRG1/COL5A1/IL6/FOXO3/ALDOA/GCNT2/MAP3K1/GBE1/PDK1/ERRFI1/DCN/NR3C1/IRS2/LDHA/ENO1/BTG1/CAV1/BCL2/ZFP36/PRKCA/PAM/PNRC1/PGM1/CXCR4/GPI/JUN/MYH9/HK2
HALLMARK_COAGULATION	HALLMARK_COAGULATION	137	-0.269548	-1.24662	0.106525	0.221926	0.140164	4745	tags=28%, list=22%, signal=22%	MBL2/ANXA1/GNB2/ADAM9/LAMP2/PDGFB/PLAU/HNF4A/HTRA1/SERPINC1/MMP9/RAPGEF3/HRG/WDR1/CTSK/SERPINA1/THBD/LEFTY2/COMP/S100A1/PROS1/GSN/USP11/MMP10/A2M/F2RL2/F11/DPP4/DUSP6/MEP1A/PECAM1/FYN/F9/LGMN/FGA/CAPN2/LTA4H/CFH
HALLMARK_TNFA_SIGNALING_VIA_NFKB	HALLMARK_TNFA_SIGNALING_VIA_NFKB	197	-0.24806	-1.20518	0.114213	0.223499	0.141157	5562	tags=29%, list=26%, signal=22%	IL7R/ICOSLG/TSC22D1/JAG1/PER1/DNAJB4/BCL6/NFAT5/PTX3/NFKB1/TNIP1/DRAM1/TNIP2/IER2/MYC/RIPK2/KLF6/FOS/NFIL3/LIF/LDLR/PLAU/RCAN1/CCL20/KLF2/NAMPT/MCL1/KLF10/KDM6B/IL6/PDE4B/MXD1/BIRC3/IL15RA/IL6ST/STAT5A/IRS2/DENND5A/IER5/BTG1/CXCL1/AREG/EHD1/TNFAIP2/ZFP36/NFKBIA/PHLDA1/MARCKS/ATP2B1/PTGER4/TNFAIP8/PNRC1/SMAD3/JUN/BTG2/CD44/TRIB1/SGK1
HALLMARK_ESTROGEN_RESPONSE_EARLY	HALLMARK_ESTROGEN_RESPONSE_EARLY	194	-0.247511	-1.20039	0.11622	0.223499	0.141157	4038	tags=24%, list=19%, signal=20%	SVIL/RASGRP1/RPS6KA2/SLC39A6/DYNLT3/FOS/KLK10/FASN/FAM102A/GJA1/RAB31/PGR/WFS1/CXCL12/KLF10/AKAP1/RHOBTB3/ABHD2/SLC26A2/SLC24A3/PPIF/IL6ST/FOXC1/ADD3/CBFA2T3/HR/RAPGEFL1/BCL11B/AREG/MAPT/NPY1R/BCL2/ITPK1/ELF1/AQP3/SEC14L2/MPPED2/KDM4B/TIAM1/LRIG1/SLC9A3R1/ABLIM1/MYB/CD44/XBP1/MED13L/NCOR2
HALLMARK_APICAL_SURFACE	HALLMARK_APICAL_SURFACE	43	-0.337479	-1.27456	0.159021	0.278842	0.176111	5073	tags=42%, list=24%, signal=32%	PCSK9/BRCA1/MAL/ADAM10/SRPX/LYN/LYPD3/AKAP7/GATA3/SLC22A12/IL2RB/ADIPOR2/DCBLD2/APP/SHROOM2/IL2RG/SULF2/NCOA6
HALLMARK_IL6_JAK_STAT3_SIGNALING	HALLMARK_IL6_JAK_STAT3_SIGNALING	87	-0.277682	-1.20283	0.161379	0.278842	0.176111	3351	tags=38%, list=16%, signal=32%	CXCL11/LTB/IL4R/TLR2/TNFRSF1B/CXCL13/HAX1/IL3RA/OSMR/CD9/IFNGR1/TNFRSF21/ITGA4/EBI3/PTPN11/GRB2/CSF3R/IL6/FAS/TYK2/CD38/IL15RA/CD14/IL6ST/IL17RA/A2M/LEPR/IL2RG/CXCL1/PTPN1/PDGFC/JUN/CD44
HALLMARK_OXIDATIVE_PHOSPHORYLATION	HALLMARK_OXIDATIVE_PHOSPHORYLATION	183	-0.244764	-1.17943	0.16199	0.278842	0.176111	7268	tags=42%, list=34%, signal=28%	SLC25A4/NNT/SLC25A3/VDAC1/CYCS/NDUFV2/IDH3G/NDUFAB1/ACADM/UQCRC2/DLST/DECR1/UQCRQ/MFN2/ACAT1/PDHB/COX7B/MTX2/VDAC3/SUCLA2/TCIRG1/MTRF1/ECH1/MTRR/UQCRFS1/COX11/OPA1/MRPS22/DLAT/ACAA2/POR/PRDX3/RETSAT/RHOT2/ACADSB/SLC25A5/IDH3B/NDUFS4/ACAA1/ACADVL/MDH1/CASP7/COX10/CPT1A/VDAC2/NDUFA5/PMPCA/COX15/FH/PDHA1/HADHB/UQCRB/LRPPRC/BAX/SLC25A20/TIMM17A/BCKDHA/NDUFV1/SDHC/PDHX/ABCB7/MDH2/ATP6V1C1/GOT2/LDHA/AT…
HALLMARK_APICAL_JUNCTION	HALLMARK_APICAL_JUNCTION	194	-0.239463	-1.16136	0.167305	0.278842	0.176111	3853	tags=23%, list=18%, signal=19%	INPPL1/CTNND1/TRO/CERCAM/GNAI2/RAC2/JUP/CTNNA1/MMP9/TGFBI/LIMA1/SKAP2/MPP5/ACTC1/STX4/EVL/TSC1/CDH6/SPEG/SIRPA/VCAM1/ZYX/ITGB1/PTEN/SHROOM2/VCAN/PIK3R3/VCL/DHX16/GTF2F1/IKBKG/PCDH1/MPZL2/PECAM1/PLCG1/CDSN/ACTN4/CLDN6/CAP1/ACTB/MSN/SYK/PTPRC/CD209/MYH9
HALLMARK_GLYCOLYSIS	HALLMARK_GLYCOLYSIS	197	-0.236644	-1.14972	0.182741	0.294744	0.186154	6522	tags=37%, list=30%, signal=26%	GYS1/PSMC4/HMMR/IGFBP3/IER3/AURKA/PGK1/GPC1/PDK3/SLC16A3/STC2/HAX1/ALDOB/KIF20A/MPI/AGL/GALK2/ME2/GLRX/PFKP/GUSB/CITED2/ARPP19/RRAGD/HS6ST2/DEPDC1/EGLN3/UGP2/MDH1/GALE/HDLBP/NASP/SLC25A13/GYS2/GOT1/KIF2A/TGFBI/AK3/PHKA2/SLC35A3/HOMER1/COL5A1/ALDOA/SDHC/GMPPA/GFPT1/CHPF/PRPS1/ME1/EXT2/DCN/MDH2/QSOX1/PYGL/IRS2/GOT2/VCAN/LDHA/FUT8/ENO1/HS2ST1/G6PD/GMPPB/PAM/PGAM1/PYGB/GNE/COPB2/CXCR4/CD44/ALG1/HK2
HALLMARK_WNT_BETA_CATENIN_SIGNALING	HALLMARK_WNT_BETA_CATENIN_SIGNALING	42	-0.329939	-1.23406	0.190698	0.297965	0.188188	3573	tags=31%, list=17%, signal=26%	FRAT1/FZD1/HDAC11/CTNNB1/CCND2/TCF7/HDAC2/NUMB/PPARD/NCSTN/HEY1/LEF1/NCOR2
HALLMARK_UV_RESPONSE_UP	HALLMARK_UV_RESPONSE_UP	151	-0.242653	-1.14268	0.206186	0.312402	0.197307	4409	tags=24%, list=21%, signal=19%	POLG2/LYN/ASNS/ACAA1/RASGRP1/FOS/CHRNA5/HNRNPU/RAB27A/GLS/PARP2/IL6/PPAT/PRKACA/POLE3/TFRC/PPT1/ALDOA/FMO1/CEBPG/TMBIM6/PPIF/IL6ST/DDX21/ATP6V1C1/RRAD/PRKCD/BTG1/FEN1/NFKBIA/CASP3/FGF18/AQP3/AMD1/ABCB1/BTG2
HALLMARK_ANGIOGENESIS	HALLMARK_ANGIOGENESIS	36	-0.326943	-1.18603	0.221529	0.319164	0.201577	6249	tags=42%, list=29%, signal=30%	SLCO2A1/ITGAV/JAG1/TNFRSF21/PRG2/NRP1/SERPINA5/KCNJ8/CCND2/APP/THBD/APOH/LPL/VCAN/LUM
HALLMARK_PANCREAS_BETA_CELLS	HALLMARK_PANCREAS_BETA_CELLS	40	-0.323593	-1.19488	0.229687	0.319164	0.201577	5871	tags=42%, list=27%, signal=31%	SLC2A2/PCSK2/NEUROD1/SST/SEC11A/VDR/PCSK1/PDX1/SPCS1/SRPRB/G6PC2/HNF1A/SRP14/DPP4/STXBP1/FOXO1/INS
HALLMARK_INFLAMMATORY_RESPONSE	HALLMARK_INFLAMMATORY_RESPONSE	198	-0.231606	-1.12598	0.229798	0.319164	0.201577	5580	tags=30%, list=26%, signal=23%	PSEN1/IL7R/ICOSLG/CXCL8/LCK/RGS1/ATP2A2/OSMR/RAF1/APLNR/HIF1A/FZD5/CCR7/NFKB1/MYC/LYN/RIPK2/KLF6/RASGRP1/TACR1/LIF/GNAI3/LDLR/ABI1/EBI3/SEMA4D/IL2RB/CYBB/CSF3/PVR/CCL20/CSF3R/NAMPT/IL18RAP/DCBLD2/IL10RA/IL6/SLC7A1/KCNA3/BDKRB1/PDE4B/IL15/MXD1/IL15RA/CD14/LPAR1/LCP2/SLAMF1/P2RX7/C5AR1/PDPN/CD82/MEP1A/NFKBIA/TAPBP/ATP2B1/PTGER4/CALCRL/KIF1B/BTG2
HALLMARK_P53_PATHWAY	HALLMARK_P53_PATHWAY	193	-0.222676	-1.08036	0.301144	0.406951	0.257022	4865	tags=26%, list=23%, signal=20%	ABAT/RETSAT/PTPN14/VDR/EPHA2/WWP1/DRAM1/RB1/RPS27L/XPC/POM121/FOS/LIF/ZNF365/DEF6/NDRG1/CCND2/CTSD/TSPYL2/APP/FAS/TNNI1/FOXO3/DDB2/BAX/SEC61A1/FUCA1/FBXW7/TM4SF1/PERP/MXD1/RCHY1/POLH/NOL8/KIF13B/RRAD/IER5/CYFIP2/BTG1/CD82/DGKA/VWA5A/LDHB/TXNIP/LRMP/ZFP36L1/PPM1D/JUN/BTG2/ERCC5
HALLMARK_SPERMATOGENESIS	HALLMARK_SPERMATOGENESIS	132	-0.233116	-1.07374	0.328457	0.432181	0.272956	6787	tags=33%, list=32%, signal=22%	TNP2/TKTL1/SHE/TOPBP1/IFT88/AURKA/MTNR1A/VDAC3/SLC2A5/TNP1/CST8/KIF2C/TCP11/DMC1/DDX4/EZH2/TNNI3/RAD17/DCC/CCNB2/NEK2/TULP2/TTK/GSG1/BUB1/CDKN3/GMCL1/PARP2/SCG5/CNIH2/SCG3/ALOX15/HSPA1L/PEBP1/TLE4/STRBP/CFTR/DBF4/NEFH/ZC3H14/LPIN1/ADAD1/SNAP91
HALLMARK_PEROXISOME	HALLMARK_PEROXISOME	102	-0.238765	-1.05078	0.360497	0.462176	0.291901	4907	tags=25%, list=23%, signal=19%	ITGB1BP1/ESR2/RETSAT/ISOC1/RXRG/ABCB9/ACAA1/EPHX2/SEMA3C/PEX13/ERCC3/HSD17B4/MSH2/CACNA1B/GNPAT/TOP2A/CNBP/GSTK1/MVP/STS/VPS4B/ACSL5/ABCB1/CDK7/CRABP1
HALLMARK_EPITHELIAL_MESENCHYMAL_TRANSITION	HALLMARK_EPITHELIAL_MESENCHYMAL_TRANSITION	197	-0.213753	-1.0385	0.38198	0.471484	0.29778	3834	tags=37%, list=18%, signal=31%	PLOD3/CDH2/SAT1/ECM1/SDC1/IL32/ITGA2/CAPG/EMP3/GLIPR1/IGFBP3/VEGFC/GPC1/OXTR/PDGFRB/THY1/CADM1/LRP1/APLP1/ITGAV/PCOLCE/ITGA5/BMP1/PTHLH/FSTL3/CXCL8/COL8A2/PCOLCE2/PTX3/LAMC1/COL5A3/DST/PMP22/P3H1/HTRA1/SPOCK1/TPM4/GJA1/TGFBI/COPA/SNTB1/PPIB/PVR/COL6A2/CXCL12/COL5A1/IL6/FAS/FUCA1/CDH6/COMP/IL15/BASP1/VCAM1/ITGB1/SERPINE2/DCN/QSOX1/VCAN/ABI3BP/COL11A1/FLNA/CXCL1/AREG/MGP/ANPEP/THBS2/MCM7/JUN/CD44/L…
HALLMARK_INTERFERON_ALPHA_RESPONSE	HALLMARK_INTERFERON_ALPHA_RESPONSE	92	0.207993	1.01316	0.386617	0.471484	0.29778	6558	tags=39%, list=31%, signal=27%	C1S/TRIM14/CASP8/EIF2AK2/NUB1/BST2/SLC25A28/IFI27/LGALS3BP/CXCL10/GMPR/IFIT2/PARP9/HERC6/EPSTI1/OAS1/ISG15/PSME1/CNP/ISG20/BATF2/RTP4/OASL/RSAD2/IFI35/LY6E/IFITM1/IRF9/IRF7/IFIT3/TRIM26/MX1/DHX58/CMPK2/IFI44L/IFI44
HALLMARK_REACTIVE_OXIGEN_SPECIES_PATHWAY	HALLMARK_REACTIVE_OXIGEN_SPECIES_PATHWAY	46	-0.255078	-0.970348	0.496148	0.585099	0.369536	2362	tags=17%, list=11%, signal=16%	SBNO2/IPCEF1/OXSR1/PRNP/G6PD/MPO/MBP/LSP1
HALLMARK_HEME_METABOLISM	HALLMARK_HEME_METABOLISM	191	-0.202208	-0.979687	0.503185	0.585099	0.369536	2688	tags=18%, list=13%, signal=16%	ARHGEF12/ATP6V0A1/MOCOS/UCP2/CDC27/PIGQ/FOXO3/TFRC/RNF19A/CCDC28A/NCOA4/RCL1/XPO7/EZH1/CAST/NR3C1/VEZF1/ADD1/SPTB/KLF3/YPEL5/DAAM1/ELL2/NFE2L1/MFHAS1/AQP3/SEC14L1/BACH1/RBM5/GMPS/ABCG2/BTG2/PICALM/KHNYN
HALLMARK_INTERFERON_GAMMA_RESPONSE	HALLMARK_INTERFERON_GAMMA_RESPONSE	195	-0.197002	-0.955006	0.568702	0.646253	0.40816	2943	tags=17%, list=14%, signal=15%	NAMPT/RNF213/IL10RA/IL6/FAS/ST8SIA4/CD38/PDE4B/ADAR/IL15/VCAM1/IRF4/IL15RA/ARID5B/RIPK1/PELI1/LCP2/BANK1/BTG1/PTPN6/TNFAIP2/MVP/NFKBIA/TAPBP/PTPN1/CASP3/TXNIP/CD74/NCOA3/HLA-A/ITGB7/SSPN/CFH
HALLMARK_KRAS_SIGNALING_DN	HALLMARK_KRAS_SIGNALING_DN	186	0.171724	0.938323	0.642202	0.713558	0.450668	5724	tags=30%, list=27%, signal=22%	CLDN8/PDK2/IGFBP2/LGALS7/KLHDC8A/CDKAL1/SNCB/KRT15/CD207/DLK2/TG/SLC6A3/UPK3B/GPRC5C/ADRA2C/NOS1/CCNA1/EDN1/KCND1/STAG3/NGB/LFNG/COPZ2/INSL5/MYH7/TGFB2/YPEL1/FGFR3/SYNPO/MEFV/GRID2/FSHB/TFAP2B/TFF2/MAGIX/GPR3/EFHD1/NR4A2/IL12B/CALML5/FGGY/SERPINB2/HTR1B/SNN/GP1BA/KCNMB1/SLC12A3/ITGB1BP2/CKM/CD80/IFNG/KLK7/RSAD2/MTHFR/CPA2/KCNE2
HALLMARK_HEDGEHOG_SIGNALING	HALLMARK_HEDGEHOG_SIGNALING	35	-0.227411	-0.820749	0.73125	0.794837	0.502002	6159	tags=34%, list=29%, signal=24%	THY1/DPYSL2/SHH/PTCH1/NF1/GLI1/NRP1/RTN1/CDK6/NRP2/HEY1/MYH9
HALLMARK_MYOGENESIS	HALLMARK_MYOGENESIS	198	0.165975	0.911294	0.747619	0.795339	0.50232	705	tags=8%, list=3%, signal=7%	CDH13/IGFBP7/TAGLN/MYOM1/DMD/COL4A2/SGCD/CHRNB1/ADAM12/COL6A3/ANKRD2/GNAO1/SYNGR2/SPHK1/CASQ2
HALLMARK_NOTCH_SIGNALING	HALLMARK_NOTCH_SIGNALING	32	-0.228236	-0.802474	0.768254	0.800265	0.50543	2144	tags=38%, list=10%, signal=34%	PSEN2/NOTCH1/CUL1/DTX2/JAG1/FZD5/FZD1/FBXW11/PPARD/NOTCH3/PRKCA/NOTCH2
HALLMARK_XENOBIOTIC_METABOLISM	HALLMARK_XENOBIOTIC_METABOLISM	196	0.156243	0.856405	0.893023	0.911248	0.575525	3529	tags=18%, list=16%, signal=15%	HES6/TNFRSF1A/ACP1/TAT/CYB5A/PTGES3/ENTPD5/CES1/SLC46A3/SLC6A6/TYR/RAP1GAP/ABCC3/SERTAD1/FABP1/FAH/AKR1C3/ATOH8/CBR1/TTPA/AP4B1/PC/CASP6/ELOVL5/ID2/BLVRB/TDO2/TGFB2/DDAH2/CSAD/ALDH3A1/SLC22A1/PINK1/DDC/PDLIM5
HALLMARK_BILE_ACID_METABOLISM	HALLMARK_BILE_ACID_METABOLISM	112	0.147233	0.748726	0.98227	0.98227	0.620381	4826	tags=24%, list=23%, signal=19%	PEX26/PAOX/PECR/PXMP2/ABCD1/LIPE/ABCG8/SOAT2/RBP1/GCLM/AKR1D1/SCP2/ALDH1A1/PRDX5/PEX19/GC/BBOX1/SLCO1A2/CYP7A1/TTR/FADS2/ABCD3/PHYH/LONP2/AGXT/ALDH8A1/SULT2B1

## Sheet: SA vitamin D3
ID	Description	setSize	enrichmentScore	NES	pvalue	p.adjust	qvalues	rank	leading_edge	core_enrichment
HALLMARK_E2F_TARGETS	HALLMARK_E2F_TARGETS	194	-0.537123	-2.46486	6.8851e-17	2.71549e-15	1.02903e-15	4046	tags=46%, list=19%, signal=38%	TOP2A/PPM1D/PRKDC/RBBP7/AURKB/CENPE/AURKA/MLH1/PTTG1/DIAPH3/CDC25B/SRSF2/ILF3/ASF1B/WDR90/ANP32E/CKS1B/IPO7/CTCF/SUV39H1/BRCA1/TIPIN/SNRPB/KPNA2/HMMR/POLD2/NASP/ORC2/RRM2/TP53/RAN/SPC24/PMS2/CHEK2/DNMT1/TRIP13/DLGAP5/PPP1R8/CDCA8/MCM4/AK2/STMN1/GINS1/ORC6/HUS1/POLE/CHEK1/ESPL1/TACC3/CDK1/PCNA/DDX39A/CENPM/TUBB/TUBG1/TK1/NOP56/RACGAP1/PLK1/CDC25A/MKI67/POLD3/CDCA3/BIRC5/EZH2/KIF22/MCM6/POLA2/GINS4…
HALLMARK_G2M_CHECKPOINT	HALLMARK_G2M_CHECKPOINT	191	-0.535954	-2.45537	1.0862e-16	2.71549e-15	1.02903e-15	3892	tags=48%, list=18%, signal=40%	BUB3/TLE3/AURKB/CENPE/AURKA/NOTCH2/PTTG1/CDC25B/SRSF2/ILF3/RAD23B/PBK/TGFB1/CKS1B/PAFAH1B1/KIF15/CTCF/TOP1/SUV39H1/NUP50/KPNA2/HMMR/NASP/HNRNPU/KPNB1/CENPA/PRMT5/SMAD3/CDC45/SLC7A1/TTK/CBX1/DKC1/BUB1/RBM14/KNL1/HMGN2/STMN1/HIRA/ORC6/NDC80/HUS1/RBL1/INCENP/TNPO2/CCNA2/POLE/CHEK1/ESPL1/PTTG3P/TACC3/UPF1/CDK1/DDX39A/NCL/SNRPD1/PRC1/PML/E2F1/TPX2/RACGAP1/PLK1/NUSAP1/CDC25A/NUMA1/ODF2/EWSR1/MT2A/MKI67…
HALLMARK_MITOTIC_SPINDLE	HALLMARK_MITOTIC_SPINDLE	197	-0.513433	-2.36871	5.03017e-15	8.38362e-14	3.17695e-14	4528	tags=50%, list=21%, signal=40%	CDC27/CDK5RAP2/ARHGEF11/NCK2/CSNK1D/KATNB1/SUN2/TOP2A/CENPJ/CEP250/CENPE/FGD4/AURKA/BCAR1/NOTCH2/SOS1/WASF1/TUBGCP2/ARHGEF7/TIAM1/TUBGCP3/RABGAP1/KIF3B/PALLD/CNTROB/PAFAH1B1/KIF15/GEMIN4/SHROOM2/PREX1/CNTRL/FGD6/EPB41L2/TSC1/MID1/FSCN1/DLGAP5/CDC42BPA/TTK/MYO9B/PXN/CEP72/MYO1E/BUB1/MAP1S/ARHGAP10/NDC80/DYNC1H1/NIN/INCENP/AKAP13/ARHGAP4/ESPL1/RAB3GAP1/FLNB/ARHGEF2/CDK1/VCL/HDAC6/ALMS1/MAPRE1/CTTN/…
HALLMARK_HEME_METABOLISM	HALLMARK_HEME_METABOLISM	191	0.407565	2.26003	4.58968e-11	5.7371e-10	2.17406e-10	5442	tags=53%, list=25%, signal=40%	DCUN1D1/BNIP3L/BLVRB/ISCA1/UROS/KAT2B/RAP1GAP/TSPO2/YPEL5/CLIC2/ICAM4/KEL/HMBS/GYPA/XK/PPP2R5B/TRAK2/GYPB/USP15/OSBP2/TMCC2/MXI1/OPTN/RIOK3/GYPC/PIGQ/LAMP2/TMEM9B/GLRX5/GYPE/FBXO9/SLC4A1/RHCE/SLC2A1/BSG/BPGM/FOXO3/CLCN3/TRIM10/RBM38/FECH/PPOX/EPB42/MOSPD1/CA1/UBAC1/RHAG/KLF1/TNS1/EPB41/NR3C1/GCLC/PDZK1IP1/ADIPOR1/SLC11A2/SLC25A38/GDE1/AHSP/ACSL6/BACH1/RNF19A/CROCCP2/ELL2/MYL4/KLF3/SELENBP1/TFRC/S…
HALLMARK_INTERFERON_ALPHA_RESPONSE	HALLMARK_INTERFERON_ALPHA_RESPONSE	92	-0.564422	-2.3407	1.34939e-10	1.34939e-09	5.11348e-10	5476	tags=65%, list=26%, signal=49%	PSMB9/IFIH1/TRAFD1/DDX60/CMPK2/IFITM2/PSMB8/HERC6/UBE2L6/LAMP3/ISG20/RTP4/BATF2/NUB1/EIF2AK2/TMEM140/IFIT2/BST2/IFIT3/IRF9/TRIM5/IFI35/UBA7/STAT2/PARP14/IL4R/IFI44/TRIM26/OASL/ADAR/RSAD2/IFI44L/RNF31/PARP9/TAP1/LAP3/DHX58/PSME1/CCRL2/USP18/ISG15/IFI27/TXNIP/SP110/IRF7/HLA-C/MOV10/IFITM1/PSME2/MX1/SELL/EPSTI1/CD74/IFITM3/CNP/LY6E/OAS1/ELF1/TRIM14/IFI30
HALLMARK_INTERFERON_GAMMA_RESPONSE	HALLMARK_INTERFERON_GAMMA_RESPONSE	195	-0.453338	-2.08676	1.0147e-09	8.4558e-09	3.2043e-09	5349	tags=50%, list=25%, signal=38%	IFIH1/FPR1/TRAFD1/RBCK1/DDX60/NLRC5/IFIT1/CMPK2/TOR1B/IFITM2/PSMB8/HERC6/UBE2L6/HLA-B/IL10RA/ISG20/RTP4/PTPN1/HIF1A/BATF2/RIPK1/CMKLR1/EIF2AK2/IFIT2/BST2/AUTS2/APOL6/IFIT3/IRF9/ST3GAL5/IFI35/HLA-DQA1/PSMB10/NOD1/STAT3/STAT2/PARP14/IDO1/HLA-G/IL4R/IFI44/TRIM26/OASL/ADAR/RSAD2/HLA-A/MX2/IFI44L/RNF31/PFKP/NCOA3/TAP1/MVP/LAP3/DHX58/IL18BP/XAF1/PSME1/USP18/ISG15/SELP/IFI27/TXNIP/SERPING1/HLA-DMA/SP110…
HALLMARK_MYC_TARGETS_V1	HALLMARK_MYC_TARGETS_V1	193	-0.424043	-1.94642	1.80177e-07	1.28698e-06	4.87698e-07	3997	tags=38%, list=19%, signal=31%	RUVBL2/BUB3/U2AF1/RFC4/NCBP1/SRM/SNRPB2/FAM120A/LDHA/SRSF2/NCBP2/RAD23B/SLC25A3/RRM1/PSMD7/CCT7/PRPF31/SERBP1/RPL14/KPNA2/POLD2/ORC2/TCP1/HNRNPU/PSMB3/RAN/VDAC1/KPNB1/HNRNPA2B1/CDC45/TRIM28/CANX/CCT5/HSP90AB1/MCM4/RRP9/CAD/PSMD8/TARDBP/PSMC4/COX5A/TUFM/EIF3B/CCNA2/MRPL9/PCNA/CSTF2/SNRPD1/EIF4H/PSMD3/NOP56/PABPC1/SNRPA/PPM1G/EIF4A1/PSMD14/TYMS/MCM6/SNRPD3/SYNCRIP/HNRNPD/SF3B3/AIMP2/MCM2/GOT2/MCM7/…
HALLMARK_GLYCOLYSIS	HALLMARK_GLYCOLYSIS	197	-0.385515	-1.77857	1.98846e-05	0.000124278	4.7095e-05	5253	tags=40%, list=25%, signal=31%	PPFIA4/NDUFV3/AGRN/RBCK1/RRAGD/IGFBP3/PLOD2/VEGFA/TPBG/ANG/GPC3/GALK1/GNPDA1/ISG20/TPI1/DEPDC1/CITED2/PYGB/GMPPB/P4HA2/ELF3/SLC25A10/FAM162A/SLC25A13/ALG1/AURKA/EXT1/COG2/ALDOB/KDELR3/QSOX1/LDHA/PGLS/TFF3/ALDH9A1/GMPPA/PDK3/BIK/CHST2/SLC37A4/HDLBP/HMMR/NASP/CHST12/CENPA/PFKP/CHPF/KIF20A/CLN6/GOT1/MPI/PGAM1/MDH2/TKTL1/G6PD/STMN1/CLDN9/LDHC/GYS1/PSMC4/CHPF2/TALDO1/CDK1/TGFBI/AK4/PLOD1/ECD/GUSB/ALDO…
HALLMARK_OXIDATIVE_PHOSPHORYLATION	HALLMARK_OXIDATIVE_PHOSPHORYLATION	183	-0.377875	-1.72056	7.21882e-05	0.000401046	0.000151975	3854	tags=30%, list=18%, signal=25%	POR/NDUFB4/NDUFB8/TIMM50/LDHA/NDUFS2/ACAT1/SLC25A3/ATP6V1H/COX15/ALDH6A1/ALAS1/PDK4/ECH1/NDUFA7/VDAC1/UQCRC1/UQCRFS1/TIMM10/DECR1/MDH2/ABCB7/IDH3B/PMPCA/COX5A/SLC25A5/NDUFS1/NDUFV1/PDHA1/COX8A/ECHS1/CYB5R3/CPT1A/IDH3G/IMMT/OGDH/IDH2/HADHB/VDAC2/HSPA9/FH/ATP6AP1/SDHC/GRPEL1/BCKDHA/HSD17B10/GOT2/SDHA/GPI/NNT/AIFM1/ACAA2/CS/ACO2/MFN2
HALLMARK_APICAL_JUNCTION	HALLMARK_APICAL_JUNCTION	194	-0.36924	-1.69445	0.000101343	0.000506717	0.000192019	4817	tags=34%, list=22%, signal=27%	NEXN/CNTN1/CADM2/CLDN5/WNK4/AMH/SYMPK/CX3CL1/PIK3R3/DSC3/INPPL1/CD209/TMEM8B/ACTN3/IKBKG/ITGB1/TSPAN4/PCDH1/SHC1/ICAM2/SHROOM2/ADAM23/PBX2/ACTG1/CERCAM/MAP4K2/NF2/EPB41L2/MADCAM1/TSC1/FSCN1/EXOC4/CAP1/SPEG/AKT2/CNN2/YWHAH/PLCG1/RRAS/CLDN9/VASP/CLDN7/MMP9/PECAM1/VAV2/ZYX/NRTN/STX4/ACTN1/TGFBI/VCL/TUBG1/JUP/SRC/CTNNA1/ACTB/VWF/VCAN/MYH9/NF1/GTF2F1/RAC2/MSN/ACTN4/SYK/GNAI2
HALLMARK_UNFOLDED_PROTEIN_RESPONSE	HALLMARK_UNFOLDED_PROTEIN_RESPONSE	106	-0.430491	-1.83756	0.000117142	0.000532462	0.000201775	4409	tags=41%, list=21%, signal=32%	EXOSC4/BANF1/XBP1/EXOC2/CXXC1/IGFBP1/BAG3/KDELR3/SHC1/CHAC1/KHSRP/CKS1B/GEMIN4/DDX10/ATF3/WFS1/PARN/DKC1/RRP9/HSP90B1/ATP6V0D1/YIF1A/ALDH18A1/FUS/PSAT1/CNOT2/EXOSC9/CNOT4/TATDN2/NOP14/NOP56/PDIA6/EXOSC10/DCTN1/EIF4A1/HSPA9/EDC4/SEC31A/DCP1A/PDIA5/HYOU1/CALR/EIF4A3
HALLMARK_MTORC1_SIGNALING	HALLMARK_MTORC1_SIGNALING	193	-0.364642	-1.67376	0.000263324	0.00109718	0.000415774	4615	tags=35%, list=22%, signal=27%	GMPS/GBE1/ATP2A2/BHLHE40/TPI1/CD9/PIK3R3/ARPC5L/NUP205/XBP1/SHMT2/SCD/GSK3B/AURKA/LDHA/PFKL/TOMM40/NMT1/NFKBIB/PSMD12/SLC37A4/FADS1/RRM2/DHCR7/HSPA4/GAPDH/CANX/GOT1/STIP1/DHCR24/BUB1/MCM4/G6PD/PSME3/RRP9/HSP90B1/PSMC4/NFYC/ACACA/PSAT1/DDX39A/SLC9A3R1/AK4/TUBG1/TUBA4A/PGM1/IMMT/PLK1/CDC25A/ALDOA/CORO1A/HK2/ENO1/CFP/PSMD14/HSPA9/SORD/GLA/PHGDH/MCM2/GPI/FDXR/IFI30/ITGB2/ACLY/RPA1/CALR
HALLMARK_FATTY_ACID_METABOLISM	HALLMARK_FATTY_ACID_METABOLISM	155	-0.365488	-1.64314	0.000418251	0.00160866	0.000609597	4734	tags=35%, list=22%, signal=27%	TP53INP2/UBE2L6/RETSAT/ETFDH/GCDH/HAO2/ACADVL/BCKDHB/HSD17B7/ALAD/CBR1/ALDH1A1/BPHL/LDHA/ENO3/ALDH9A1/CPT2/ECH1/ACADL/BLVRA/GPD2/NCAPH2/ECI2/PPARA/DECR1/PSME1/MDH2/DHCR24/YWHAH/IDH3B/ALDH3A2/ACSS1/HIBCH/ACSL5/IL4I1/LGALS1/PDHA1/SMS/ECHS1/CPT1A/IDH3G/HADHB/ALDOA/NSDHL/FH/SDHC/HSD17B10/FASN/SDHA/ACAA2/HSD17B4/MGLL/S100A10/ACO2
HALLMARK_MYC_TARGETS_V2	HALLMARK_MYC_TARGETS_V2	58	-0.476993	-1.85001	0.000498235	0.00177941	0.000674303	2066	tags=36%, list=10%, signal=33%	IPO4/SLC19A1/SRM/GRWD1/FARSA/NOP2/MCM4/RRP9/MYBBP1A/PES1/PPRC1/UTP20/NOP56/PLK1/HK2/TCOF1/MAP3K6/SORD/AIMP2/LAS1L/MCM5
HALLMARK_UV_RESPONSE_DN	HALLMARK_UV_RESPONSE_DN	139	-0.382282	-1.69284	0.00061048	0.00203493	0.000771133	5332	tags=43%, list=25%, signal=33%	SFMBT1/MGMT/ATP2C1/TFPI/CELF2/PRKCA/ARHGEF9/PIK3CD/PPARG/CAV1/ATRN/BHLHE40/SMAD7/GRK5/PIK3R3/COL3A1/CITED2/LTBP1/BCKDHB/LAMC1/NOTCH2/PMP22/PHF3/NFIB/ICA1/GJA1/ADGRL2/PIAS3/RXRA/COL11A1/ITGB3/DBP/PDGFRB/SYNJ2/ABCC1/SMAD3/SLC7A1/CDC42BPA/DDAH1/FZD2/PLCB4/PEX14/MAP2K5/SIPA1L1/VAV2/KIT/CDK13/ZMIZ1/SYNE1/FYN/SLC22A18/ANXA2/RUNX1/NFKB1/MT1E/NRP1/KCNMA1/MGLL/ANXA4/KALRN
HALLMARK_SPERMATOGENESIS	HALLMARK_SPERMATOGENESIS	132	-0.371532	-1.63571	0.000880139	0.00275043	0.00104227	4110	tags=27%, list=19%, signal=22%	PIAS2/TULP2/RFC4/AURKA/AKAP4/TOPBP1/NPHP1/PRKAR2A/PEBP1/NF2/HSPA2/IDE/ZC3H14/TTK/PAPOLB/PARP2/BUB1/TKTL1/MAST2/LDHC/SLC2A5/CLPB/TALDO1/IP6K1/SCG3/CDK1/MTOR/IL13RA2/TLE4/ALOX15/EZH2/CDKN3/CCNB2/NEFH/KIF2C/DBF4
HALLMARK_HYPOXIA	HALLMARK_HYPOXIA	191	-0.340469	-1.55979	0.00113669	0.00334321	0.0012669	5348	tags=40%, list=25%, signal=30%	NEDD4L/RBPJ/PPFIA4/XPNPEP1/HK1/INHA/RRAGD/PRKCA/IGFBP3/JUN/PKP1/LOX/VEGFA/TPBG/GPC3/GALK1/CAV1/GBE1/ISG20/BHLHE40/TPI1/ETS1/CITED2/P4HA2/FAM162A/GCK/NDST1/NCAN/IGFBP1/BCL2/EXT1/ALDOB/KDELR3/GAA/TIPARP/LDHA/ENO3/SLC25A1/CCNG2/PFKL/BCAN/PDK3/HAS1/CHST2/CP/SLC37A4/HDLBP/ATP7A/SRPX/PFKP/ATF3/PLIN2/GAPDH/PLAUR/ALDOC/TKTL1/LDHC/GYS1/SLC2A5/TGFBI/NAGK/AK4/PGM1/ALDOA/SCARB1/HK2/ANXA2/NDRG1/MT2A/ENO1/MYH9…
HALLMARK_ADIPOGENESIS	HALLMARK_ADIPOGENESIS	188	-0.347927	-1.58859	0.00122983	0.0034162	0.00129456	5559	tags=40%, list=26%, signal=30%	CDKN2C/YWHAG/SUCLG1/RETN/CAT/ETFB/MCCC1/VEGFB/RREB1/CHCHD10/SORBS1/COQ3/PPARG/TST/ATP1B3/GBE1/RETSAT/TOB1/PEMT/SLC25A10/SLC19A1/POR/SLC5A6/SLC25A1/CCNG2/PFKL/CPT2/PTGER3/NMT1/ECH1/ACADL/SAMM50/GPHN/GPD2/DHCR7/UQCRC1/ELMOD3/AGPAT3/PLIN2/UCP2/DECR1/ENPP2/MDH2/PTCD3/LPCAT3/AK2/PEX14/STAT5A/ESYT1/SLC27A1/ALDH2/HIBCH/MYLK/TALDO1/COQ9/COX8A/ECHS1/TKT/IDH3G/PGM1/IMMT/ALDOA/SCARB1/DHRS7B/APLP2/SDHC/GRPEL…
HALLMARK_APICAL_SURFACE	HALLMARK_APICAL_SURFACE	43	-0.480419	-1.75305	0.00195791	0.00499367	0.00189234	6076	tags=58%, list=28%, signal=42%	ATP8B1/SLC2A4/ADIPOR2/CD160/FLOT2/CROCC/RTN4RL1/CX3CL1/TMEM8B/SLC34A3/NTNG1/GATA3/EPHB4/SHROOM2/BRCA1/AFAP1L2/SRPX/LYN/PLAUR/IL2RB/IL2RG/SULF2/NCOA6/DCBLD2/APP
HALLMARK_DNA_REPAIR	HALLMARK_DNA_REPAIR	140	-0.364446	-1.61334	0.00199747	0.00499367	0.00189234	3799	tags=31%, list=18%, signal=25%	RFC4/POLA1/ADRM1/VPS28/DGCR8/VPS37B/SUPT5H/POLR3C/CDA/NCBP2/ERCC1/ITPA/XPC/SEC61A1/PDE6G/FEN1/ERCC5/TP53/RAD51/RAE1/BCAP31/ADA/DGUOK/POLR2G/POLR2E/PCNA/ERCC4/SNAPC4/AAAS/DDB2/SF3A3/ZWINT/POLH/POLD3/USP11/TYMS/POLA2/GTF2F1/POLR2A/HCLS1/TAF6/POM121/SSRP1
HALLMARK_COMPLEMENT	HALLMARK_COMPLEMENT	196	-0.338026	-1.55788	0.00248561	0.00591812	0.00224266	3717	tags=28%, list=17%, signal=23%	PRCP/DGKG/PREP/S100A13/HNF4A/GATA3/CTSB/CDA/LIPA/CASP10/TIMP1/ITIH1/RHOG/NOTCH4/ZEB1/WAS/SH2B3/CP/DUSP5/GPD2/C1QA/LYN/CSRP1/GP9/CTSH/SERPINC1/LAP3/CBLB/GZMB/SERPINA1/PLAUR/LTF/GNGT2/SERPING1/IRF7/C2/CLU/CALM3/SPOCK2/STX4/SCG3/LCP2/FYN/LRP1/RNF4/CTSD/SRC/HSPA1A/PRDM4/PRKCD/ANXA5/TIMP2/FCN1/GNAI2/EHD1
HALLMARK_HEDGEHOG_SIGNALING	HALLMARK_HEDGEHOG_SIGNALING	35	-0.502983	-1.76886	0.00314348	0.00714427	0.0027073	6062	tags=54%, list=28%, signal=39%	HEY1/CNTFR/NRCAM/GLI1/L1CAM/CRMP1/VEGFA/LDB1/TLE3/CELSR1/TLE1/AMOT/NRP2/PML/DPYSL2/RTN1/MYH9/NF1/NRP1
HALLMARK_CHOLESTEROL_HOMEOSTASIS	HALLMARK_CHOLESTEROL_HOMEOSTASIS	72	-0.413	-1.65403	0.00442311	0.00961545	0.00364375	6256	tags=47%, list=29%, signal=34%	LDLR/GSTM2/LPL/SQLE/EBP/CXCL16/LGMN/PMVK/PPARG/CD9/HSD17B7/SCD/AVPR1A/CHKA/FBXO6/PDK3/ACTG1/ECH1/S100A11/DHCR7/ATF3/ANTXR2/PLAUR/ACSS2/ALDOC/CLU/FDPS/GUSB/ATXN2/NSDHL/FABP5/FASN/GLDC/ANXA5
HALLMARK_MYOGENESIS	HALLMARK_MYOGENESIS	198	-0.315753	-1.45722	0.00893966	0.0186243	0.00705763	5736	tags=34%, list=27%, signal=25%	TNNI2/ITGA7/IGFBP7/HBEGF/LPIN1/GADD45B/PPFIA4/AGRN/GJA5/SGCA/SORBS1/IGFBP3/IGF1/CFD/NAV2/APLNR/CACNG1/BHLHE40/WWTR1/CTF1/COL3A1/TNNI1/MYL6B/PDLIM7/SCD/OCEL1/CKB/CHRNG/SVIL/ACTN3/HSPB2/GAA/ENO3/ITGB1/SIRT2/TGFB1/GNAO1/SYNGR2/MYH2/SPEG/ERBB3/AKT2/TNNT3/FLII/ITGB5/ABLIM1/MRAS/CLU/FDPS/TSC2/MYLK/MEF2D/SPARC/TEAD4/TNNT1/PDE4DIP/PFKM/PSEN2/ANKRD2/SPTAN1/PLXNB2/MYH9/TPM3/ATP6AP1/GSN/APP/LSP1
HALLMARK_P53_PATHWAY	HALLMARK_P53_PATHWAY	193	-0.312195	-1.43302	0.0117191	0.0234382	0.00888183	5635	tags=34%, list=26%, signal=25%	HBEGF/BLCAP/SERPINB5/EPHX1/CDKN2A/TRAFD1/CTSF/TSPYL2/GM2A/JUN/F2R/CCND3/CD81/ST14/ZFP36L1/RETSAT/TNNI1/TOB1/FAM162A/PPM1D/DEF6/TCN2/LIF/XPC/FUCA1/TGFB1/VDR/SFN/SEC61A1/RAB40C/RXRA/BAK1/ERCC5/TP53/ABAT/RRP8/NINJ1/ATF3/MKNK2/TAP1/IP6K2/TXNIP/ADA/CCNK/CYFIP2/DGKA/ZBTB16/SLC3A2/PDGFA/PCNA/KLF4/CTSD/DDB2/STEAP3/NDRG1/POLH/HDAC3/PLXNB2/HMOX1/FDXR/IFI30/APP/POM121/S100A10/KIF13B
HALLMARK_EPITHELIAL_MESENCHYMAL_TRANSITION	HALLMARK_EPITHELIAL_MESENCHYMAL_TRANSITION	197	-0.2974	-1.37205	0.0221963	0.0426851	0.0161754	7482	tags=44%, list=35%, signal=29%	BASP1/GPC1/SERPINE2/THBS1/FMOD/COL12A1/CALU/MMP14/CD59/TGFBR3/CXCL6/SGCG/FSTL1/LOXL1/IL6/HTRA1/TNFAIP3/SPOCK1/ABI3BP/RGS4/ID2/FBN2/SNAI2/COMP/MFAP5/DAB2/COL8A2/SFRP4/IL32/GADD45B/TIMP3/MYL9/MXRA5/IGFBP3/PRSS2/JUN/PMEPA1/PLOD2/LOX/VEGFA/EMP3/ELN/COL3A1/PLOD3/MATN2/LAMC1/SNTB1/NOTCH2/CAPG/QSOX1/PMP22/GJA1/ITGB1/FUCA1/TIMP1/TGFB1/CDH2/ITGA5/COL11A1/PTX3/ITGB3/LUM/TPM4/PDGFRB/ACTA2/PLAUR/ANPEP/ITGB5/…
HALLMARK_ESTROGEN_RESPONSE_EARLY	HALLMARK_ESTROGEN_RESPONSE_EARLY	194	-0.296367	-1.36003	0.0246769	0.0446945	0.0169369	5320	tags=32%, list=25%, signal=25%	KRT8/FOXC1/PDLIM3/AR/GAB2/SH3BP5/NAV2/TJP3/TPBG/ESRP2/IL6ST/TGIF2/BHLHE40/OLFM1/MAST4/TOB1/XBP1/ELF3/INPP5F/BCL2/SVIL/CELSR2/KDM4B/TIAM1/TIPARP/TFF3/GJA1/SFN/MAPT/ALDH3B1/ZNF185/CELSR1/ASB13/PAPSS2/SCNN1A/KLF10/MLPH/ITPK1/ABAT/AFF1/DHCR7/CLIC3/WFS1/KRT18/SEC14L2/ABLIM1/RHOBTB3/MYBBP1A/CLDN7/SLC27A2/SLC24A3/RPS6KA2/FLNB/KLF4/SLC9A3R1/SCARB1/ELF1/CBFA2T3/MYOF/FASN/GLA/P2RY2/NCOR2
HALLMARK_ALLOGRAFT_REJECTION	HALLMARK_ALLOGRAFT_REJECTION	195	-0.303013	-1.3948	0.0250289	0.0446945	0.0169369	3590	tags=26%, list=17%, signal=22%	CAPG/CCR2/LIF/GLMN/HLA-DQA1/TIMP1/PSMB10/TGFB1/WAS/IL16/HLA-G/MAP4K1/MTIF2/BRCA1/IL4R/HLA-A/LYN/IL27RA/TAP1/FGR/IL12RB1/GZMB/CCR1/HLA-DMA/CCR5/IRF7/C2/MMP9/IL2RB/HLA-E/SPI1/CD74/LCP2/IL2RG/TAPBP/ITGAL/PRF1/FLNA/TRAF2/CCL7/IRF4/PTPN6/CFP/NLRP3/ELF4/ELANE/CXCR3/EIF3A/EIF4G3/ITGB2/HCLS1
HALLMARK_XENOBIOTIC_METABOLISM	HALLMARK_XENOBIOTIC_METABOLISM	196	-0.294532	-1.35742	0.027972	0.0482276	0.0182757	4562	tags=31%, list=21%, signal=24%	ATP2A2/RETSAT/ETFDH/SLC35B1/NPC1/NDRG2/PGD/SPINT2/PEMT/ASL/CBR1/SHMT2/MCCC2/IGFBP1/POR/FETUB/BCAR1/BPHL/HNF4A/GSTM4/COMT/CRP/CDA/ALDH9A1/CNDP2/PSMB10/ITIH1/ALAS1/PAPSS2/PDK4/NMT1/ECH1/SLC6A12/NINJ1/PTGDS/GSS/TMBIM6/AP4B1/PPARD/TMEM176B/CYP27A1/CYP2E1/SLC12A4/CYP2S1/CYFIP2/ALDH2/SERTAD1/GART/NFS1/DHRS1/PYCR1/CES1/JUP/MT2A/ABCC3/PROS1/HMOX1/MTHFD1/FBP1/ACO2
HALLMARK_ANGIOGENESIS	HALLMARK_ANGIOGENESIS	36	-0.41981	-1.47646	0.0338733	0.0564556	0.0213937	4758	tags=56%, list=22%, signal=43%	S100A4/PGLYRP1/CXCL6/FSTL1/VTN/LPL/VEGFA/COL3A1/PF4/LRPAP1/FGFR1/TIMP1/LUM/PRG2/VAV2/PDGFA/TNFRSF21/VCAN/NRP1/APP
HALLMARK_IL6_JAK_STAT3_SIGNALING	HALLMARK_IL6_JAK_STAT3_SIGNALING	87	-0.341717	-1.41037	0.0363165	0.058575	0.0221968	5211	tags=36%, list=24%, signal=27%	EBI3/GRB2/JUN/IL6ST/CD9/PTPN1/CBL/PF4/IL2RA/DNTT/ACVRL1/INHBE/IRF9/TGFB1/STAT3/STAT2/BAK1/IL4R/ITGB3/TYK2/IL12RB1/CCR1/IL17RA/LEPR/TNFRSF1B/IL2RG/TNFRSF21/CCL7/HMOX1/CD38/CD14
HALLMARK_COAGULATION	HALLMARK_COAGULATION	137	-0.311301	-1.37883	0.038835	0.0606796	0.0229944	6229	tags=36%, list=29%, signal=26%	F9/KLKB1/RABIF/COMP/CAPN5/PROZ/A2M/LGMN/TIMP3/F12/CFD/DPP4/APOC1/ANG/CD9/C8A/CASP9/PF4/P2RY1/PREP/S100A13/HNF4A/CTSB/TIMP1/SIRT2/ITIH1/PROC/WDR1/ITGB3/CAPN2/C1QA/CSRP1/GP9/CTSH/SERPINC1/PLAU/SERPINA1/SERPING1/C2/CLU/MMP9/PECAM1/SPARC/FYN/LRP1/VWF/USP11/PROS1/FGA/GSN
HALLMARK_APOPTOSIS	HALLMARK_APOPTOSIS	158	-0.295678	-1.3301	0.0564904	0.0855915	0.0324347	5600	tags=37%, list=26%, signal=28%	CREBBP/IL18/GADD45B/BCL2L11/TIMP3/MGMT/RHOT2/PPT1/IGFBP6/JUN/FEZ1/DNM1L/F2R/PEA15/CAV1/ISG20/RETSAT/TSPO/SMAD7/ADD1/CASP9/TOP2A/GSTM1/AVPR1A/CDC25B/TIMP1/SATB1/GNA15/BIK/PLCB2/AIFM3/BRCA1/LUM/PDGFRB/ATF3/CASP2/TAP1/ERBB3/KRT18/BCAP31/TXNIP/RELA/CLU/IFITM3/PRF1/PSEN2/SPTAN1/VDAC2/MADD/PAK1/HMOX1/GSN/CD38/LMNA/FDXR/TIMP2/APP/NEFH/CD14
HALLMARK_INFLAMMATORY_RESPONSE	HALLMARK_INFLAMMATORY_RESPONSE	198	-0.277393	-1.28019	0.0630841	0.0927708	0.0351552	6880	tags=41%, list=32%, signal=28%	GP1BA/STAB1/RGS1/GABBR1/CXCL6/TACR1/IL6/PIK3R5/CCL5/IL10/PCDH7/CXCR6/MSR1/LDLR/IL15RA/TLR2/FZD5/CCR7/CCL2/ITGB8/HBEGF/KCNA3/C3AR1/IL18/FPR1/ATP2C1/KIF1B/EBI3/P2RX4/IL7R/APLNR/SCN1B/TPBG/GPC3/TNFSF15/LAMP3/ATP2A2/IL10RA/EMP3/RTP4/CX3CL1/P2RX7/HIF1A/CMKLR1/EIF2AK2/BST2/ADRM1/MARCO/EDN1/LIF/TIMP1/RHOG/GNA15/ITGA5/IL4R/CHST2/ITGB3/PTGIR/LYN/SLC7A1/CCRL2/PLAUR/C5AR1/RELA/IRF7/PVR/IFITM1/SELL/IL2RB/LCP…
HALLMARK_UV_RESPONSE_UP	HALLMARK_UV_RESPONSE_UP	151	-0.291212	-1.30065	0.0715152	0.102165	0.038715	5351	tags=31%, list=25%, signal=24%	EPHX1/BCL2L11/PDLIM3/TYRO3/PPT1/FOSB/CCND3/TST/GGH/IL6ST/OLFM1/GAL/MGAT1/POLE3/SLC25A4/RFC4/KLHDC3/HLA-F/CHKA/NKX2-5/ALAS1/PSMC3/BAK1/SLC6A12/FEN1/HNRNPU/HSPA2/LYN/TGFBRAP1/ATF3/PRKACA/TAP1/TMBIM6/STIP1/PARP2/DLG4/AP2S1/TUBA4A/CNP/ALDOA/MARK2/PRKCD/CXCL2/GRPEL1/HMOX1/CCNE1/CDKN1C
HALLMARK_ESTROGEN_RESPONSE_LATE	HALLMARK_ESTROGEN_RESPONSE_LATE	195	-0.27324	-1.25775	0.0805134	0.111824	0.0423755	5363	tags=31%, list=25%, signal=24%	DNAJC1/ETFB/FOXC1/PDLIM3/CPE/METTL3/TJP3/TPBG/TST/CHST8/CAV1/IL6ST/ISG20/ST14/CD9/OLFM1/GAL/XRCC3/TOB1/XBP1/TOP2A/CKB/BCL2/CELSR2/JAK1/TIAM1/TFF3/SFN/MAPT/PTGER3/ALDH3B1/EMP2/PAPSS2/SCNN1A/ITPK1/AFF1/DHCR7/CLIC3/WFS1/KIF20A/RABEP1/SERPINA1/LTF/ALDH3A2/SLC27A2/SLC24A3/RPS6KA2/FLNB/SLC29A1/KLF4/SLC9A3R1/IDH2/SCARB1/PTPN6/GINS2/FABP5/MYOF/SORD/GLA/RNASEH2A/NCOR2
HALLMARK_KRAS_SIGNALING_UP	HALLMARK_KRAS_SIGNALING_UP	194	-0.272551	-1.25074	0.0834313	0.112745	0.0427244	5197	tags=30%, list=24%, signal=23%	CPE/TFPI/ST6GAL1/IGFBP3/TRIB2/IL7R/SCN1B/PSMB8/IL1RL2/ADAM8/CBX8/IL10RA/LAT2/ETS1/CBL/EPHB2/HOXD11/GABRA3/CMKLR1/CD37/LIF/FUCA1/GADD45G/SNAP25/TMEM176A/SATB1/MAP4K1/PRDM1/DNMBP/RABGAP1L/PLAU/AKT2/PLAUR/PEG3/TMEM176B/PTPRR/MMP9/PECAM1/ENG/NIN/F13A1/SCG3/KLF4/TNFRSF1B/IL2RG/EVI5/JUP/MAFB/PTCD2/DOCK2/EPB41L3/ATG10/IKZF1/LCP1/DCBLD2/PIGR/NRP1/ETV1/ITGB2
HALLMARK_PEROXISOME	HALLMARK_PEROXISOME	102	-0.306682	-1.29788	0.0934343	0.12294	0.0465878	6151	tags=38%, list=29%, signal=27%	ABCD3/ESR2/CRAT/ATXN1/ABCB9/NUDT19/CRABP2/CEL/CAT/SMARCC1/PEX6/RETSAT/TSPO/HAO2/TOP2A/SLC25A4/ALDH1A1/ALDH9A1/ERCC1/ECH1/FADS1/IDE/ECI2/ABCD1/MVP/PEX13/CLN6/DHCR24/YWHAH/DLG4/PEX14/SLC27A2/FDPS/CADM1/ACSL5/IDH2/PABPC1/GSTK1/HSD17B4
HALLMARK_IL2_STAT5_SIGNALING	HALLMARK_IL2_STAT5_SIGNALING	194	-0.267395	-1.22708	0.106933	0.137094	0.0519513	4741	tags=29%, list=22%, signal=23%	RRAGD/UCK2/P2RX4/CCND3/CD81/UMPS/IL10RA/BHLHE40/RNH1/XBP1/GPR83/IL2RA/BCL2/CAPN3/CAPG/TIAM1/LRRC8C/ENO3/LIF/EOMES/SYNGR2/PLEC/IL4R/PLAGL1/DCPS/GLIPR2/NCOA3/SERPINC1/SERPINB6/PLIN2/RABGAP1L/NOP2/CTSZ/CKAP4/ADAM19/SELP/MYO1E/SELL/IL2RB/TNFRSF1B/TNFRSF21/IFITM3/POU2F1/HK2/NDRG1/IRF4/HUWE1/CYFIP1/HIPK2/CDCP1/GALM/NRP1/CCNE1/TNFRSF8/MAP6/CDKN1C/ANXA4
HALLMARK_WNT_BETA_CATENIN_SIGNALING	HALLMARK_WNT_BETA_CATENIN_SIGNALING	42	-0.347028	-1.25704	0.153846	0.192308	0.0728745	8627	tags=60%, list=40%, signal=36%	SKP2/WNT5B/JAG2/AXIN2/CCND2/NOTCH1/LEF1/KAT2A/FZD1/DVL2/CUL1/HEY1/NKD1/AXIN1/RBPJ/TCF7/WNT6/CSNK1E/NOTCH4/TP53/PPARD/WNT1/NCSTN/PSEN2/NCOR2
HALLMARK_PI3K_AKT_MTOR_SIGNALING	HALLMARK_PI3K_AKT_MTOR_SIGNALING	103	-0.287604	-1.21811	0.158028	0.192717	0.0730295	4064	tags=28%, list=19%, signal=23%	RPS6KA1/RIPK1/GSK3B/RALB/TIAM1/DUSP3/NOD1/SFN/THEM4/STAT2/PRKAR2A/NFKBIB/MKNK2/PLCG1/HSP90B1/PLCB1/TSC2/PPP1CA/ACACA/YWHAB/CDK1/IL2RG/E2F1/CFL1/TRAF2/CSNK2B/ARHGDIA/RPTOR/CALR
HALLMARK_REACTIVE_OXIGEN_SPECIES_PATHWAY	HALLMARK_REACTIVE_OXIGEN_SPECIES_PATHWAY	46	-0.325869	-1.20828	0.197183	0.234742	0.0889548	2422	tags=35%, list=11%, signal=31%	ATOX1/FES/TXNRD2/CAT/IPCEF1/NDUFB4/NDUFS2/HMOX2/PFKP/ABCC1/G6PD/PDLIM1/MPO/SCAF4/MSRA/LSP1
HALLMARK_NOTCH_SIGNALING	HALLMARK_NOTCH_SIGNALING	32	-0.342582	-1.16916	0.239163	0.278096	0.105384	7329	tags=56%, list=34%, signal=37%	WNT2/KAT2A/FZD1/MAML2/CUL1/NOTCH3/FZD5/PRKCA/HEYL/TCF7L2/APH1A/LFNG/ARRB1/NOTCH2/PPARD/DTX2/FZD7/PSEN2
HALLMARK_ANDROGEN_RESPONSE	HALLMARK_ANDROGEN_RESPONSE	97	0.2209	1.07678	0.306667	0.348485	0.132057	4208	tags=33%, list=20%, signal=27%	KLK3/RPS6KA3/DNAJB9/SPDEF/MAK/VAPA/SLC38A2/PDLIM5/SPCS3/TARP/RAB4A/SLC26A2/IDI1/CENPN/GNAI3/TPD52/ITGAV/ELL2/MAP7/UAP1/STEAP4/RRP12/FKBP5/ELOVL5/UBE2J1/IQGAP2/ZBTB10/HMGCR/GPD1L/GSR/HSD17B14/ANKH
HALLMARK_BILE_ACID_METABOLISM	HALLMARK_BILE_ACID_METABOLISM	112	-0.246753	-1.06167	0.333748	0.370832	0.140526	6321	tags=32%, list=29%, signal=23%	GNMT/CYP39A1/ABCD3/PEX12/ATXN1/PXMP2/ABCA3/CAT/AR/CYP7B1/CH25H/PEX6/RETSAT/NPC1/ALDH1A1/BCAR3/ALDH9A1/RXRA/PEX7/ABCG8/PIPOX/FADS1/ABCD1/PEX13/BMP6/DHCR24/CYP27A1/SLC27A2/ACSL5/SLC29A1/SLC22A18/IDH2/GSTK1/PFKM/FDXR/HSD17B4
HALLMARK_TGF_BETA_SIGNALING	HALLMARK_TGF_BETA_SIGNALING	54	-0.266253	-1.02083	0.438356	0.476474	0.180559	5104	tags=33%, list=24%, signal=25%	RHOA/PMEPA1/WWTR1/SMAD7/SKI/FKBP1A/BCAR3/TGFB1/HDAC1/KLF10/SMAD3/CDK9/ENG/PPP1CA/HIPK2/SPTBN1/CDKN1C/NCOR2
HALLMARK_PANCREAS_BETA_CELLS	HALLMARK_PANCREAS_BETA_CELLS	40	0.238444	0.974608	0.482201	0.512979	0.194392	2470	tags=18%, list=12%, signal=16%	PCSK1/PAX6/PAK3/G6PC2/SRP9/AKT3/SYT13
HALLMARK_PROTEIN_SECRETION	HALLMARK_PROTEIN_SECRETION	95	-0.213286	-0.890666	0.679124	0.707421	0.268075	3746	tags=22%, list=17%, signal=18%	COPE/COG2/ICA1/ARCN1/ATP6V1H/ANP32E/ATP7A/GBF1/LMAN1/KRT18/AP1G1/SCAMP3/AP2S1/CLTA/ATP1A1/GNAS/AP2B1/COPB2/GLA/SEC31A/SCRN1
HALLMARK_KRAS_SIGNALING_DN	HALLMARK_KRAS_SIGNALING_DN	186	-0.150015	-0.684849	0.98227	0.995327	0.377177	6172	tags=26%, list=29%, signal=19%	CYP39A1/RIBC2/SLC25A23/CNTFR/KRT5/IRS4/TNNI3/NPHS1/DCC/NR6A1/EPHA5/PCDHB1/VPREB1/MAST3/PKP1/MAGIX/ARPP21/SMPX/CACNG1/KCNE2/TCF7L1/C5/DTNB/CLDN16/GPR19/LFNG/PDE6B/CHRNG/CELSR2/EDN1/P2RX6/COPZ2/MTHFR/PDK2/PDCD1/CDKAL1/CHST2/SLC38A3/RSAD2/IFI44L/EFHD1/ABCB11/GP2/MX1/ZBTB16/SPHK2/CAMK1D/PRODH
HALLMARK_TNFA_SIGNALING_VIA_NFKB	HALLMARK_TNFA_SIGNALING_VIA_NFKB	197	-0.137094	-0.632481	0.995327	0.995327	0.377177	6850	tags=28%, list=32%, signal=20%	BCL3/KLF2/CXCL6/IL6/TNFAIP3/FJX1/CCL5/SQSTM1/ID2/LDLR/IL15RA/TLR2/CEBPD/CCL2/HBEGF/NFKB2/IL18/EGR2/GADD45B/IFIH1/JUN/PMEPA1/FOSB/IL7R/VEGFA/IL6ST/BHLHE40/EIF1/SLC2A6/IFIT2/TIPARP/EDN1/LIF/REL/NFKBIE/PTX3/KLF10/DUSP5/NINJ1/ATF3/IER2/TAP1/SMAD3/PLAU/PER1/CCRL2/PLAUR/RELA/KDM6B/STAT5A/SPSB1/KLF4/EGR1/NFKB1/CXCL2/EHD1

## Sheet: WE placebo
ID	Description	setSize	enrichmentScore	NES	pvalue	p.adjust	qvalues	rank	leading_edge	core_enrichment
HALLMARK_OXIDATIVE_PHOSPHORYLATION	HALLMARK_OXIDATIVE_PHOSPHORYLATION	183	0.505324	2.6452	1.58645e-16	7.93224e-15	4.17486e-15	3498	tags=48%, list=16%, signal=40%	MRPL11/COX6A1/UQCR11/CYB5A/MDH1/NDUFV2/MRPL15/UQCR10/ATP6V1G1/NDUFB4/MRPL34/TOMM22/ISCA1/NDUFB7/COX7A2L/NDUFB2/NDUFA4/NDUFB5/NDUFA3/UQCRH/VDAC3/TIMM9/SDHC/COX7A2/COX11/SLC25A12/ACAT1/MGST3/NDUFC1/CYCS/LRPPRC/NDUFS4/MRPS15/SLC25A4/MTX2/OPA1/NDUFA8/SURF1/PHB2/NDUFS3/NDUFA5/ATP6V1F/NDUFA6/NDUFAB1/ATP6V1C1/COX5A/SLC25A6/ACADSB/ETFA/UQCRC2/NDUFA7/NDUFB8/COX6C/NDUFA2/MRPS30/UQCRQ/MRPS22/SDHD/ATP6V1D/IS…
HALLMARK_HEME_METABOLISM	HALLMARK_HEME_METABOLISM	191	0.469989	2.48808	7.61759e-15	1.9044e-13	1.00231e-13	4201	tags=49%, list=20%, signal=39%	XK/BNIP3L/TSPO2/GLRX5/DCUN1D1/CA1/PSMD9/GYPE/GYPA/CLIC2/HMBS/YPEL5/RCL1/MKRN1/MOSPD1/TRIM10/NUDT4/TRAK2/ACSL6/GCLC/ISCA1/RIOK3/CDC27/UBAC1/RHCE/GYPB/BPGM/KAT2B/TMEM9B/AHSP/MGST3/TFRC/MXI1/TCEA1/SLC25A38/FECH/CTSE/UROD/OPTN/KLF1/ADIPOR1/GYPC/EPB42/BLVRB/ALAS2/FBXO9/GATA1/HAGH/DCAF10/MYL4/USP15/SNCA/SELENBP1/TMCC2/MFHAS1/SPTA1/SLC6A9/CDR2/ELL2/VEZF1/PDZK1IP1/BSG/ALAD/ATG4A/KLF3/EIF2AK1/DCAF11/HDGF/…
HALLMARK_MYC_TARGETS_V1	HALLMARK_MYC_TARGETS_V1	193	0.466596	2.46671	1.83384e-14	3.0564e-13	1.60863e-13	3064	tags=42%, list=14%, signal=37%	ABCE1/PRDX4/ACP1/CCT2/PPIA/MRPL9/SSBP1/HNRNPC/DDX21/VDAC3/C1QBP/NAP1L1/NOP16/PSMA2/RPS10/PSMD14/ERH/EIF3J/EIF1AX/EIF2S1/HSPE1/PSMA6/HPRT1/RAN/NME1/RPL6/PHB2/RPS3/NDUFAB1/RPL22/RPLP0/SNRPD2/COX5A/AP3S1/ILF2/NCBP1/UBA2/CLNS1A/COPS5/GNL3/CBX3/TRA2B/NPM1/RPS6/SSB/VBP1/PSMA4/RPS5/SNRPB2/TXNL4A/POLE3/DUT/ODC1/USP1/EIF4E/EEF1B2/PSMA1/PWP1/SNRPG/HDDC2/SNRPA1/HNRNPA1/CCT4/TFDP1/YWHAQ/CYC1/HNRNPA3/LSM2/PGK…
HALLMARK_MITOTIC_SPINDLE	HALLMARK_MITOTIC_SPINDLE	197	-0.4275	-2.08523	2.40195e-09	3.00244e-08	1.58023e-08	3825	tags=38%, list=18%, signal=32%	SPTBN1/MYH10/KLC1/SORBS2/ARL8A/ATG4B/KIF23/CLIP2/PALLD/TUBGCP3/HDAC6/NEDD9/ESPL1/ARHGEF11/PAFAH1B1/RAPGEF6/RABGAP1/ARHGAP29/FLNB/ALMS1/CDC42EP2/FGD4/CAPZB/OPHN1/MARCKS/CEP250/MID1IP1/MAP1S/CKAP5/CNTROB/CTTN/DOCK2/APC/CDK5RAP2/FSCN1/ITSN1/DST/KIF1B/ARHGEF2/GEMIN4/TUBGCP2/CDC42EP1/ARHGAP4/NOTCH2/NF1/ARHGAP27/TBCD/TUBA4A/MAP3K11/TRIO/SPTAN1/CNTRL/EZR/FLNA/BCR/PXN/TSC1/BCL2L11/NUMA1/INCENP/SSH2/KIF3C…
HALLMARK_APICAL_JUNCTION	HALLMARK_APICAL_JUNCTION	194	-0.412416	-2.00882	1.20934e-07	1.20934e-06	6.36494e-07	5485	tags=44%, list=26%, signal=33%	DHX16/ACTN3/B4GALT1/NLGN3/VCL/DMP1/CLDN19/PIK3CB/AMIGO1/SDC3/TAOK2/TSPAN4/EPB41L2/ICAM5/LAMC2/PCDH1/CTNND1/CLDN14/ITGA2/RAC2/KCNH2/NLGN2/SPEG/EGFR/NFASC/SHC1/CD274/MYH10/MADCAM1/GTF2F1/CLDN4/STX4/ITGA10/WNK4/PTK2/CD86/CAP1/CLDN9/PBX2/PLCG1/ACTG2/INPPL1/CD34/IKBKG/ALOX15B/ACTB/THBS3/MAPK11/MAPK13/JUP/MAPK14/CDH1/AKT2/MPZL1/ADAM15/NRXN2/GNAI2/ZYX/SIRPA/NF2/PTPRC/BAIAP2/LAMB3/PKD1/CADM3/FSCN1/TMEM8B…
HALLMARK_E2F_TARGETS	HALLMARK_E2F_TARGETS	194	0.336888	1.78122	2.25001e-05	0.000187501	9.86848e-05	3088	tags=29%, list=14%, signal=25%	PRDX4/EXOSC8/RPA3/PPP1R8/NAP1L1/TFRC/RPA2/PRPS1/EIF2S1/RAN/NME1/PDS5B/RAD51C/RRM2/POLE4/LYAR/TRA2B/STAG1/CDKN2C/NUP107/MTHFD2/CSE1L/EED/CKS2/IPO7/PAICS/PRIM2/RAD51AP1/NUDT21/PHF5A/DUT/USP1/AK2/LUC7L3/HUS1/ATAD2/SMC3/CDK4/DCTPP1/SRSF1/BRMS1L/MMS22L/MLH1/PSIP1/SLBP/UBR7/RAD50/DEK/POP7/PTTG1/GSPT1/SRSF2/HMGB2/PCNA/MSH2/ING3/SMC4
HALLMARK_DNA_REPAIR	HALLMARK_DNA_REPAIR	140	0.360635	1.80405	6.40712e-05	0.000457652	0.000240869	3064	tags=31%, list=14%, signal=27%	PNP/GTF2A2/POLR1D/POLR3GL/PRIM1/DAD1/UMPS/RPA3/RBX1/TAF10/SUPT4H1/TMED2/RALA/ZNRD1/GTF2H5/POLD4/RPA2/ARL6IP1/HPRT1/NME1/SURF1/TAF9/SRSF6/POLE4/GUK1/MRPL40/NUDT21/TAF12/DUT/POLR2I/GPX4/GTF2B/POLR2J/RFC5/DCTN4/AK1/TSG101/POLR2G/NME4/DGUOK/COX17/POLL/POLR2K/PCNA
HALLMARK_MYOGENESIS	HALLMARK_MYOGENESIS	198	-0.336905	-1.64356	0.000307011	0.00191882	0.0010099	5764	tags=37%, list=27%, signal=28%	CLU/ACTC1/RYR1/TNNT3/PPP1R3C/MYH2/ACTN3/TAGLN/MB/CFD/BHLHE40/HSPB2/CKB/MYH3/SYNGR2/DTNA/SIRT2/GNAO1/CKMT2/DMPK/KCNH2/SPEG/TGFB1/MRAS/MYH11/PFKM/FDPS/ACSL1/ADAM12/SMTN/PICK1/SGCD/OCEL1/COL6A2/CACNA1H/MYBPH/RIT1/ABLIM1/ADCY9/SVIL/FLII/MYL7/AKT2/MAPRE3/TNNI2/TPM3/BDKRB2/CTF1/PSEN2/AEBP1/NOTCH1/ENO3/EPHB3/ERBB3/DAPK2/MYO1C/PDLIM7/PLXNB2/SPTAN1/PDE4DIP/ITGB4/MEF2D/TPM2/LSP1/PGAM2/ITGA7/APP/MYBPC3/TEAD…
HALLMARK_INFLAMMATORY_RESPONSE	HALLMARK_INFLAMMATORY_RESPONSE	198	-0.323428	-1.57781	0.000954504	0.0053028	0.00279095	5747	tags=35%, list=27%, signal=26%	TIMP1/EREG/RHOG/MEP1A/LIF/CD55/HIF1A/SLC28A2/NPFFR2/IL1B/C3AR1/ATP2A2/SGMS2/NDP/CCL17/FFAR2/GNAI3/NOD2/SLAMF1/PDPN/ROS1/EDN1/ADM/OSMR/SLC31A1/IRF7/CMKLR1/PTGIR/LCP2/STAB1/EIF2AK2/SLC11A2/NFKB1/LDLR/PTAFR/BEST1/IFNAR1/LYN/GCH1/LPAR1/IRF1/IL1R1/TNFRSF1B/IL18R1/PLAUR/MXD1/OPRK1/CD82/P2RY2/ITGB3/PIK3R5/KIF1B/PVR/PTPRE/IL4R/FPR1/C5AR1/GABBR1/NLRP3/KLF6/ITGA5/SELL/CSF3R/ICAM1/MEFV/SCARF1/TAPBP/CD14/SEM…
HALLMARK_MTORC1_SIGNALING	HALLMARK_MTORC1_SIGNALING	193	0.281961	1.49062	0.00126203	0.00631013	0.00332112	4137	tags=30%, list=19%, signal=24%	PNP/UBE2D3/PPIA/PPA1/HMBS/GCLC/DDIT4/PRDX1/UCHL5/PSMD14/TFRC/TCEA1/XBP1/HSPE1/HPRT1/CCNG1/PSMA3/ADD3/RRM2/GLRX/COPS5/EGLN3/ACTR3/IDI1/ATP6V1D/MTHFD2/PSMC2/MLLT11/TES/PSMA4/PSMB5/SSR1/ARPC5L/CACYBP/UFM1/PDK1/CYB5B/PGK1/CTSC/EIF2S2/DAPP1/USO1/IDH1/PITPNB/EEF1E1/EBP/SEC11A/ETF1/TRIB3/NUPR1/PSMC6/LDHA/CTH/HMGCS1/PSMD12/SYTL2/SLC1A5/SRD5A1
HALLMARK_IL6_JAK_STAT3_SIGNALING	HALLMARK_IL6_JAK_STAT3_SIGNALING	87	-0.377291	-1.62314	0.00358856	0.0163116	0.00858506	4366	tags=37%, list=20%, signal=29%	IL3RA/TYK2/TGFB1/OSMR/PTPN1/JUN/LTB/IL2RG/TNF/CCR1/IFNAR1/CSF2RA/IRF9/IRF1/IL1R1/HMOX1/TNFRSF1B/IL18R1/STAT1/TNFRSF21/ACVRL1/ITGB3/TNFRSF1A/PIK3R5/STAT2/IL4R/CSF3R/LEPR/STAT3/CD14/CBL/IL17RA
HALLMARK_TNFA_SIGNALING_VIA_NFKB	HALLMARK_TNFA_SIGNALING_VIA_NFKB	197	-0.290481	-1.41689	0.00624993	0.0243598	0.0128209	2927	tags=27%, list=14%, signal=23%	ATF3/REL/EDN1/TGIF1/NFAT5/TRIB1/DENND5A/PMEPA1/JUN/TAP1/RHOB/VEGFA/NINJ1/TNF/NFKB1/LDLR/SOD2/SQSTM1/SERPINB8/GCH1/KDM6B/IRF1/KLF2/PFKFB3/NR4A2/RELB/MARCKS/PLAUR/CEBPB/MXD1/BCL6/CCNL1/LAMB3/NFKB2/RNF19B/KLF4/B4GALT5/KYNU/PTPRE/KLF6/IER2/ICAM1/PLAU/SLC2A6/BCL3/ZBTB10/EGR1/FOSB/CFLAR/FOSL2/TNFAIP2/STAT5A/EHD1
HALLMARK_ESTROGEN_RESPONSE_EARLY	HALLMARK_ESTROGEN_RESPONSE_EARLY	194	-0.304947	-1.48535	0.00633354	0.0243598	0.0128209	3531	tags=24%, list=16%, signal=20%	CISH/OLFM1/SLC24A3/RAPGEFL1/WFS1/SLC37A1/ABHD2/AR/CANT1/ELF1/SLC9A3R1/FLNB/INHBB/MUC1/ABLIM1/SCNN1A/SEMA3B/BCL2/ADCY9/SVIL/ITPK1/ALDH3B1/MYOF/WWC1/KRT18/SLC27A2/P2RY2/GJA1/TBC1D30/ABAT/PAPSS2/KLF4/IGF1R/SCARB1/MYBBP1A/GLA/MAST4/PTGES/SFN/TMEM164/GAB2/CBFA2T3/RARA/RRP12/AFF1/KDM4B/NCOR2
HALLMARK_INTERFERON_GAMMA_RESPONSE	HALLMARK_INTERFERON_GAMMA_RESPONSE	195	-0.28943	-1.40891	0.00857545	0.0306266	0.0161193	4160	tags=30%, list=19%, signal=25%	NCOA3/RBCK1/CASP8/MX1/IRF7/PARP14/PTPN1/CD274/CMKLR1/TAP1/HLA-DRB1/OGFR/SERPING1/LCP2/CD86/UPP1/EIF2AK2/TRAFD1/XAF1/PSMB10/RAPGEF6/IFNAR2/NFKB1/SOD2/AUTS2/GCH1/CIITA/IRF9/IRF1/IRF4/IFI30/NUP93/IL18BP/GBP6/STAT1/MX2/IRF5/ZNFX1/TRIM26/HLA-B/PML/SELP/SECTM1/PTPN6/STAT2/NLRC5/IL4R/FPR1/C1R/ADAR/RIPK1/RNF213/ICAM1/TRIM25/RNF31/TAPBP/STAT3/TNFAIP2/MVP
HALLMARK_WNT_BETA_CATENIN_SIGNALING	HALLMARK_WNT_BETA_CATENIN_SIGNALING	42	-0.419845	-1.54143	0.0151076	0.0500225	0.0263276	7821	tags=62%, list=36%, signal=39%	CTNNB1/DVL2/NOTCH4/KAT2A/DLL1/NUMB/FZD8/FZD1/ADAM17/HEY2/CUL1/PTCH1/HEY1/JAG2/TCF7/HDAC11/TP53/PPARD/FRAT1/WNT5B/RBPJ/PSEN2/NOTCH1/WNT1/NCSTN/NCOR2
HALLMARK_ADIPOGENESIS	HALLMARK_ADIPOGENESIS	188	0.259982	1.36483	0.0160072	0.0500225	0.0263276	3052	tags=24%, list=14%, signal=21%	COX6A1/UQCR11/COQ5/RNF11/STOM/MRPL15/ARL4A/UQCR10/DNAJB9/RIOK3/NDUFB7/SOD1/SDHC/NKIRAS1/MGST3/G3BP2/BCL2L13/IFNGR1/NDUFS3/NDUFA5/NDUFAB1/OMD/TANK/UQCRQ/DRAM2/CDKN2C/JAGN1/ANGPT1/GADD45A/SDHB/CMPK1/DDT/MYLK/CHUK/AK2/GPX4/CD302/CYC1/GPD2/IDH3A/CD36/IDH1/HADH/ATL2/SCP2/COX7B
HALLMARK_COAGULATION	HALLMARK_COAGULATION	137	-0.308302	-1.43751	0.0233645	0.0687191	0.0361679	5846	tags=35%, list=27%, signal=26%	GNG12/PLAT/DUSP6/MMP14/CLU/TIMP1/HMGCS2/GNB2/MEP1A/MMP15/THBS1/CFD/THBD/S100A1/PROS1/SIRT2/MMP11/CASP9/ITGA2/TMPRSS6/CTSB/SERPING1/C3/F9/COMP/LAMP2/C2/USP11/F12/ITGB3/PROC/GDA/LTA4H/VWF/C8G/HTRA1/C1R/WDR1/S100A13/MASP2/PLAU/KLF7/SERPINA1/LRP1/MMP9/GSN/SH2B2/PECAM1
HALLMARK_APICAL_SURFACE	HALLMARK_APICAL_SURFACE	43	-0.40885	-1.50991	0.0249584	0.0693289	0.0364889	3320	tags=35%, list=15%, signal=30%	EPHB4/MDGA1/IL2RG/BRCA1/LYN/GATA3/ADAM10/HSPB1/PLAUR/FLOT2/CROCC/TMEM8B/NCOA6/APP/SULF2
HALLMARK_APOPTOSIS	HALLMARK_APOPTOSIS	158	-0.290623	-1.38669	0.0269461	0.0709108	0.0373215	4564	tags=31%, list=21%, signal=25%	CASP9/PPT1/CDKN1B/SLC20A1/ATF3/TSPO/CDK2/CASP8/XIAP/BMF/DCN/JUN/TAP1/PTK2/RHOB/NEDD9/BRCA1/TNF/GSR/SOD2/SQSTM1/BCL2L2/PPP3R1/GCH1/PRF1/IRF1/HMOX1/HSPB1/KRT18/PSEN2/ADD1/NEFH/ERBB3/DNAJC3/BCAP31/SPTAN1/IGF2R/PAK1/MADD/BCL2L11/APP/CFLAR/RARA/LMNA/GSN/CD14/PLCB2/TIMP2/CREBBP
HALLMARK_HEDGEHOG_SIGNALING	HALLMARK_HEDGEHOG_SIGNALING	35	-0.417572	-1.46724	0.0302521	0.0756303	0.0398054	7307	tags=60%, list=34%, signal=40%	CNTFR/CELSR1/SCG2/L1CAM/RTN1/THY1/HEY2/PTCH1/HEY1/DPYSL2/NRP2/VEGFA/TLE1/OPHN1/UNC5C/GLI1/PML/NF1/CRMP1/MYH9/TLE3
HALLMARK_P53_PATHWAY	HALLMARK_P53_PATHWAY	193	-0.277864	-1.35293	0.0321637	0.0765803	0.0403054	3785	tags=25%, list=18%, signal=21%	TP53/JUN/TAP1/POLH/MKNK2/KRT17/MDM2/RAD9A/TSPYL2/SEC61A1/UPP1/IRAK1/TRAFD1/CYFIP2/PVT1/NINJ1/ALOX15B/INHBB/WRAP73/IFI30/HMOX1/MXD1/CD82/BAIAP2/KIF13B/NDRG1/ABAT/NOTCH1/RNF19B/KLF4/VWA5A/DEF6/CTSD/PTPRE/ABCC5/ST14/RHBDF2/PLXNB2/SP1/ITGB4/GM2A/IP6K2/SFN/CCNK/POM121/APP/ZFP36L1/RXRA/VDR
HALLMARK_INTERFERON_ALPHA_RESPONSE	HALLMARK_INTERFERON_ALPHA_RESPONSE	92	-0.310479	-1.34724	0.0473083	0.0962955	0.0506818	3964	tags=30%, list=18%, signal=25%	CNP/SP110/TRIM14/BATF2/CASP8/MX1/IRF7/PARP14/TAP1/OGFR/HLA-C/EIF2AK2/TRAFD1/ELF1/IRF9/TRIM5/IRF1/IFI30/UBA7/TRIM26/STAT2/PARP9/GBP2/IL4R/ADAR/SELL/TRIM25/RNF31
HALLMARK_PROTEIN_SECRETION	HALLMARK_PROTEIN_SECRETION	95	0.293018	1.36314	0.0492228	0.0962955	0.0506818	3603	tags=33%, list=17%, signal=27%	VAMP7/ARFGEF2/VAMP4/SOD1/YIPF6/SNX2/NAPG/TMED2/TMX1/SEC22B/RPS6KA3/AP3S1/GALC/RAB5A/RAB9A/TMED10/CAV2/ARFGEF1/CTSC/TSG101/BNIP3/ERGIC3/DNM1L/USO1/COPB1/BET1/RAB2A/ANP32E/ATP6V1B1/SCAMP1/ARFIP1
HALLMARK_UV_RESPONSE_DN	HALLMARK_UV_RESPONSE_DN	139	-0.285775	-1.33569	0.0496894	0.0962955	0.0506818	2741	tags=21%, list=13%, signal=18%	CDK13/NFKB1/LDLR/PTGFR/NIPBL/ATRN/LPAR1/MAPK14/ARHGEF9/GJA1/ITGB3/DYRK1A/MAGI2/PRDM2/IGF1R/NOTCH2/FZD2/ATP2B4/ZMIZ1/ABCC1/CELF2/SYNE1/SDC2/SIPA1L1/KALRN/RUNX1/SLC22A18/PIK3CD/RXRA
HALLMARK_CHOLESTEROL_HOMEOSTASIS	HALLMARK_CHOLESTEROL_HOMEOSTASIS	72	-0.329264	-1.37295	0.0497592	0.0962955	0.0506818	6755	tags=47%, list=32%, signal=32%	GLDC/FADS2/AVPR1A/NSDHL/ANXA5/ACTG1/MVD/CLU/S100A11/GSTM2/DHCR7/ADH4/ATF5/ALDOC/PPARG/ATF3/FASN/FDPS/ACSS2/SREBF2/LSS/HSD17B7/ABCA2/PDK3/LDLR/SEMA3B/CHKA/ANXA13/PLAUR/CBS/CXCL16/ATXN2/GUSB/ANTXR2
HALLMARK_HYPOXIA	HALLMARK_HYPOXIA	191	-0.269434	-1.31085	0.0500736	0.0962955	0.0506818	5140	tags=31%, list=24%, signal=24%	GALK1/NAGK/SLC2A3/AMPD3/PGM1/SDC3/DTNA/PFKL/TNFAIP3/ALDOC/PLIN2/CDKN1B/ATF3/ADM/EGFR/FOXO3/DCN/NEDD4L/JUN/HK2/AKAP12/CCNG2/AK4/CDKN1C/VEGFA/GYS1/ATP7A/PDK3/ENO1/NDST2/BCL2/ANKZF1/PFKFB3/HMOX1/CSRP2/VHL/SLC6A6/PLAUR/PKLR/RBPJ/EFNA3/NDRG1/HDLBP/TGFBI/PAM/ENO3/GPI/SCARB1/KLF6/ALDOB/HSPA5/ALDOA/SDC2/PGAM2/KLF7/NDST1/FOSL2/FBP1/MYH9/GAA
HALLMARK_ALLOGRAFT_REJECTION	HALLMARK_ALLOGRAFT_REJECTION	195	0.231237	1.22523	0.0621118	0.115022	0.0605378	2731	tags=23%, list=13%, signal=20%	ABCE1/CCL4/CRTAM/MRPL3/CD28/CD47/GZMA/TRAT1/KLRD1/GALNT1/NCK1/GPR65/CD8A/STAT4/EIF3J/CD8B/NME1/CCL5/IFNGR1/UBE2N/B2M/HLA-DQA1/SOCS5/GCNT1/EIF5A/CD3D/NPM1/CCL7/HLA-DRA/SOCS1/FASLG/RPL39/ABI1/ITK/SIT1/JAK2/SRGN/KRT1/RPS19/CCL11/ACVR2A/IL7/RPS3A/RPS9
HALLMARK_KRAS_SIGNALING_UP	HALLMARK_KRAS_SIGNALING_UP	194	-0.252872	-1.2317	0.0938416	0.167574	0.088197	5744	tags=32%, list=27%, signal=24%	ANGPTL4/EREG/ALDH1A2/LIF/CPE/PEG3/CFHR2/MAP4K1/IL1B/C3AR1/GALNT3/RETN/CROT/ETV4/KIF5C/TNFAIP3/TMEM176B/MMP11/ITGA2/BTC/GADD45G/F13A1/LCP1/PTPRR/DNMBP/TRIB1/CMKLR1/TMEM176A/SNAP91/EPB41L3/AKAP12/RABGAP1L/TLR8/LAT2/NR1H4/IL2RG/PTCD2/HOXD11/ENG/SEMA3B/CSF2RA/JUP/SDCCAG8/CBX8/MTMR10/AKT2/TNFRSF1B/TOR1AIP2/PLAUR/IKZF1/DOCK2/KLF4/VWA5A/HDAC9/PLAU/MAFB/ADAM8/NIN/MMP9/CBL/PECAM1/ITGB2
HALLMARK_XENOBIOTIC_METABOLISM	HALLMARK_XENOBIOTIC_METABOLISM	196	-0.247889	-1.20742	0.119645	0.206285	0.108571	5125	tags=31%, list=24%, signal=24%	MTHFD1/CDO1/ATP2A2/HSD17B2/PTGES3/CROT/PROS1/ESR1/LPIN2/TMEM176B/EPHA2/ACOX3/NPC1/MCCC2/ALDH9A1/GART/TTPA/PPARD/UPP1/CYFIP2/FABP1/FBLN1/PSMB10/CCL25/ALAS1/NINJ1/PGD/GNMT/GSR/SLC6A12/DDAH2/JUP/GCH1/LONP1/AP4B1/ATOH8/IL1R1/HMOX1/CYP2S1/SLC22A1/SLC6A6/ASL/ADH7/ALDH2/LCAT/PAPSS2/TNFRSF1A/TMBIM6/ITIH4/KYNU/CYP4F2/ACO2/ABCC3/CNDP2/CRP/POR/PTGES/ACOX1/CYP27A1/FBP1/CES1
HALLMARK_ANDROGEN_RESPONSE	HALLMARK_ANDROGEN_RESPONSE	97	0.257848	1.19671	0.142857	0.238095	0.125313	5264	tags=41%, list=25%, signal=31%	DNAJB9/GPD1L/VAPA/RPS6KA3/SPCS3/B2M/MYL12A/TARP/HPGD/IDI1/ITGAV/TNFAIP8/ABCC4/KLK2/DBI/SLC38A2/ELL2/ARID5B/SMS/NCOA4/TSC22D1/MAP7/UAP1/PGM3/MERTK/SPDEF/IQGAP2/LIFR/APPBP2/HMGCS1/FKBP5/UBE2J1/TPD52/PDLIM5/AKT1/INPP4B/CDK6/TMEM50A/PTPN21/PA2G4
HALLMARK_ANGIOGENESIS	HALLMARK_ANGIOGENESIS	36	-0.35194	-1.24847	0.154362	0.248972	0.131038	3391	tags=36%, list=16%, signal=30%	TIMP1/PDGFA/THBD/JAG2/PTK2/PGLYRP1/VEGFA/PRG2/FGFR1/LRPAP1/TNFRSF21/APP/VCAN
HALLMARK_COMPLEMENT	HALLMARK_COMPLEMENT	196	-0.234403	-1.14174	0.190547	0.294401	0.154948	4037	tags=21%, list=19%, signal=17%	CR2/TMPRSS6/IRF7/CTSB/DGKG/SERPING1/LCP2/STX4/C3/PRDM4/CASP10/LAMP2/PHEX/C2/LYN/PCLO/PRCP/GATA3/IRF1/WAS/GNAI2/PLAUR/CEBPB/SPOCK2/LTA4H/PIK3R5/CTSD/KYNU/LTF/C1R/ITGAM/FCN1/S100A13/HSPA5/SERPINA1/PRKCD/LRP1/CR1/EHD1/TIMP2/HSPA1A
HALLMARK_TGF_BETA_SIGNALING	HALLMARK_TGF_BETA_SIGNALING	54	-0.306029	-1.1867	0.194305	0.294401	0.154948	4458	tags=33%, list=21%, signal=26%	SLC20A1/TGFB1/TGIF1/XIAP/SPTBN1/PMEPA1/RHOA/CDKN1C/SKI/SMAD6/ENG/CDH1/TGFBR1/APC/CDK9/FKBP1A/HIPK2/NCOR2
HALLMARK_EPITHELIAL_MESENCHYMAL_TRANSITION	HALLMARK_EPITHELIAL_MESENCHYMAL_TRANSITION	197	-0.233222	-1.13759	0.202065	0.297154	0.156397	4638	tags=24%, list=22%, signal=19%	TNFAIP3/LAMC2/COPA/ITGA2/ECM2/TGFB1/MATN2/DCN/APLP1/SFRP1/PMEPA1/JUN/MAGEE1/ADAM12/PLOD3/RHOB/COMP/FBLN1/VEGFA/SGCD/COL6A2/FBLN2/FSTL3/NNMT/COL8A2/P3H1/PLOD1/PLAUR/FMOD/GJA1/BASP1/ITGB3/VIM/DST/TGFBI/EFEMP2/PVR/NOTCH2/HTRA1/WIPF1/ITGA5/TPM2/FLNA/LRP1/ANPEP/VCAN/QSOX1
HALLMARK_MYC_TARGETS_V2	HALLMARK_MYC_TARGETS_V2	58	0.272113	1.15773	0.21519	0.30525	0.160658	2760	tags=26%, list=13%, signal=23%	RCL1/NOP16/NDUFAF4/HSPE1/DUSP2/MPHOSPH10/GNL3/CBX3/NPM1/NOC4L/RABEPK/CDK4/DCTPP1/PHB/MRTO4
HALLMARK_UNFOLDED_PROTEIN_RESPONSE	HALLMARK_UNFOLDED_PROTEIN_RESPONSE	106	0.237381	1.11726	0.21978	0.30525	0.160658	4327	tags=31%, list=20%, signal=25%	LSM1/DNAJB9/SPCS1/DDIT4/PAIP1/XBP1/EIF2S1/SPCS3/EXOSC2/EXOSC1/SRPRB/NPM1/MTHFD2/RPS14/EIF4E/KIF5B/SSR1/DNAJA4/TUBB2A/LSM4/POP4/CEBPG/CHAC1/YWHAZ/SEC11A/EIF4A2/DCP2/EEF2/YIF1A/IMP3/TTC37/NFYB/CNOT6
HALLMARK_G2M_CHECKPOINT	HALLMARK_G2M_CHECKPOINT	191	0.20383	1.07906	0.229102	0.309598	0.162946	4432	tags=29%, list=21%, signal=23%	ORC5/CDC27/RPA2/PDS5B/FBXO5/DMD/TRA2B/STAG1/CDKN2C/TROAP/CKS2/PURA/PRIM2/YTHDC1/ATRX/ODC1/KIF5B/KIF11/WRN/HMGN2/DR1/CASP8AP2/HUS1/TFDP1/CDK4/SRSF1/CUL5/PTTG1/GSPT1/SLC38A1/SRSF2/CUL3/SRSF10/SAP30/SMC4/NDC80/SS18/CENPE/CENPA/KIF20B/PLK4/E2F4/CCNT1/KATNA1/KIF15/BARD1/FANCC/MNAT1/KNL1/DBF4/PRPF4B/PTTG3P/BUB3/HSPA8/ORC6/MCM6
HALLMARK_GLYCOLYSIS	HALLMARK_GLYCOLYSIS	197	-0.22402	-1.09271	0.256637	0.33768	0.177727	2927	tags=18%, list=14%, signal=15%	VEGFA/GYS1/PDK3/GALE/LHX9/CACNA1H/ENO1/ABCB6/STMN1/ANKZF1/NOL3/GOT2/PYGB/PLOD1/GPR87/DSC2/EFNA3/HDLBP/TGFBI/PAM/ALDOB/ARTN/HSPA5/G6PD/ALDOA/PYGL/SDC2/HOMER1/PGAM2/TALDO1/GUSB/PHKA2/SLC16A3/VCAN/QSOX1
HALLMARK_REACTIVE_OXIGEN_SPECIES_PATHWAY	HALLMARK_REACTIVE_OXIGEN_SPECIES_PATHWAY	46	-0.295188	-1.11129	0.30217	0.387398	0.203894	1283	tags=22%, list=6%, signal=20%	MBP/SBNO2/GCLM/MSRA/FES/G6PD/ABCC1/LSP1/SCAF4/MPO
HALLMARK_PANCREAS_BETA_CELLS	HALLMARK_PANCREAS_BETA_CELLS	40	-0.291551	-1.05625	0.401695	0.498565	0.262403	3687	tags=30%, list=17%, signal=25%	NKX2-2/G6PC2/GCG/DCX/PAK3/ABCC8/PCSK1/PKLR/HNF1A/ISL1/MAFB/VDR
HALLMARK_ESTROGEN_RESPONSE_LATE	HALLMARK_ESTROGEN_RESPONSE_LATE	195	-0.208401	-1.01447	0.408824	0.498565	0.262403	3531	tags=18%, list=16%, signal=16%	CISH/OLFM1/ST6GALNAC2/SLC24A3/SORD/RAPGEFL1/HOMER2/WFS1/SCUBE2/ABHD2/GALE/SLC9A3R1/FLNB/JAK1/SCNN1A/SEMA3B/BCL2/MAPK13/CDH1/ITPK1/ALDH3B1/MYOF/SLC27A2/PAPSS2/KLF4/PTPN6/LTF/SCARB1/ST14/ATP2B4/GLA/PTGES/SFN/SERPINA1/AFF1/NCOR2
HALLMARK_PI3K_AKT_MTOR_SIGNALING	HALLMARK_PI3K_AKT_MTOR_SIGNALING	103	-0.223768	-1.00091	0.442879	0.527237	0.277493	6160	tags=40%, list=29%, signal=29%	GSK3B/MAP2K3/MAPK1/PRKCB/CFL1/PPP1CA/TRAF2/RALB/DUSP3/MAPK8/MKNK1/IL4/PTPN11/CALR/HSP90B1/MAPK9/SMAD2/CDKN1B/CDK2/EGFR/PIKFYVE/CLTC/MAPK10/MKNK2/NFKBIB/PLCG1/IL2RG/RIT1/SQSTM1/AKT1S1/RPS6KA1/ITPR2/ACACA/TNFRSF1A/STAT2/RIPK1/YWHAB/SFN/RPTOR/TSC2/PLCB1
HALLMARK_IL2_STAT5_SIGNALING	HALLMARK_IL2_STAT5_SIGNALING	194	-0.198572	-0.967217	0.524927	0.61038	0.321253	5134	tags=29%, list=24%, signal=22%	COL6A1/SYNGR2/SLC2A3/SMPDL3A/S100A1/CYFIP1/PHLDA1/SLC29A2/ETV4/PLIN2/CAPN3/IL3RA/IL13/NCOA3/APLP1/DENND5A/FAM126B/HK2/PRAF2/CISH/RABGAP1L/LTB/CD86/RHOB/GALM/CDKN1C/CDCP1/WLS/SERPINB6/MUC1/BCL2/PLAGL1/IRF4/CTSZ/TNFRSF1B/IL18R1/TNFRSF21/MXD1/SNX9/AGER/NDRG1/SELP/ENO3/IGF1R/IL4R/KLF6/MYO1C/SELL/IGF2R/CKAP4/ADAM19/PLEC/POU2F1/AHNAK/HIPK2/HUWE1
HALLMARK_NOTCH_SIGNALING	HALLMARK_NOTCH_SIGNALING	32	-0.266515	-0.913307	0.608621	0.682202	0.359054	8228	tags=62%, list=38%, signal=39%	PRKCA/APH1A/HES1/KAT2A/DLL1/FZD1/WNT5A/MAML2/CUL1/LFNG/NOTCH3/DTX1/DTX4/TCF7L2/PPARD/PSEN2/DTX2/ARRB1/NOTCH1/NOTCH2
HALLMARK_FATTY_ACID_METABOLISM	HALLMARK_FATTY_ACID_METABOLISM	155	0.186555	0.943633	0.613982	0.682202	0.359054	4040	tags=22%, list=19%, signal=18%	MDH1/MCEE/XIST/SDHC/ACAT2/PCBD1/OSTC/ACSM3/HSP90AA1/UROD/RAP1GDS1/HPGD/PRDX6/IDI1/SDHD/ODC1/CRYZ/AUH/ALAD/GPD2/UGDH/SMS/PDHB/CD36/IDH1/HADH/LGALS1/HCCS/SERINC1/SUCLG1/ECI2/LDHA/UROS/HMGCS1
HALLMARK_UV_RESPONSE_UP	HALLMARK_UV_RESPONSE_UP	151	-0.186086	-0.880489	0.729358	0.783699	0.412473	4982	tags=26%, list=23%, signal=20%	CNP/PRPF3/RET/HSPA2/PPT1/PRKACA/ATF3/KCNH2/CDK2/PDAP1/TAP1/OLFM1/RHOB/CDKN1C/ALAS1/DGAT1/SOD2/LYN/SLC6A12/SQSTM1/STIP1/CHKA/ONECUT1/GCH1/IRF1/MAPK8IP2/HMOX1/STARD3/TMBIM6/TUBA4A/MARK2/WIZ/ALDOA/ICAM1/DLG4/BCL2L11/PRKCD/FOSB/HNRNPU
HALLMARK_BILE_ACID_METABOLISM	HALLMARK_BILE_ACID_METABOLISM	112	-0.19298	-0.871169	0.736677	0.783699	0.412473	3110	tags=16%, list=15%, signal=14%	NR1H4/ABCA2/AR/GNMT/ABCD1/ABCA9/ABCG4/DIO2/PEX11G/SLC27A2/ABCD3/ALDH8A1/GCLM/PEX6/ALDH1A1/SLC22A18/CYP27A1/RXRA
HALLMARK_PEROXISOME	HALLMARK_PEROXISOME	102	0.177393	0.830151	0.831551	0.866199	0.455894	5058	tags=25%, list=24%, signal=20%	PEX11B/PRDX1/SOD1/FIS1/SLC25A4/PRDX5/IDI1/ITGB1BP1/CDK7/CNBP/GNPAT/IDH1/SCP2/SEMA3C/MSH2/ISOC1/GSTK1/ECI2/CADM1/RXRG/CRABP2/SLC25A19/HRAS/CACNA1B/ESR2/ABCD2
HALLMARK_KRAS_SIGNALING_DN	HALLMARK_KRAS_SIGNALING_DN	186	-0.140243	-0.680767	1	1	0.526316	4433	tags=16%, list=21%, signal=13%	ENTPD7/KRT15/IDUA/ZBTB16/THNSL2/EDN1/PNMT/MX1/NPHS1/INSL5/SLC6A14/ITGB1BP2/MTHFR/CLSTN3/TCF7L1/AKR1B10/PTGFR/IRS4/PROP1/CDKAL1/NR4A2/ABCG4/TGM1/HNF1A/KRT5/PTPRJ/CAMK1D/MEFV/NR6A1/MAST3
HALLMARK_SPERMATOGENESIS	HALLMARK_SPERMATOGENESIS	132	-0.109603	-0.511616	1	1	0.526316	7845	tags=35%, list=37%, signal=22%	PCSK4/SCG3/TNP2/TOPBP1/GAD1/AURKA/DMC1/MAST2/BUB1/NOS1/PRKAR2A/HSPA4L/NEK2/TKTL1/TUBA3C/AKAP4/PDHA2/DNAJB8/HOXB1/GSG1/DCC/IP6K1/TCP11/CHRM4/ALOX15/GPR182/PGK2/HSPA2/DDX25/NPHP1/NPY5R/SNAP91/MEP1B/PHF7/SPATA6/CLVS1/DPEP3/DMRT1/TLE4/TEKT2/BRAF/NF2/CLPB/NEFH/TALDO1/MTOR

## Sheet: WE vitamin D2
ID	Description	setSize	enrichmentScore	NES	pvalue	p.adjust	qvalues	rank	leading_edge	core_enrichment
HALLMARK_MITOTIC_SPINDLE	HALLMARK_MITOTIC_SPINDLE	197	-0.507469	-2.50768	1.87932e-15	9.39662e-14	2.37388e-14	2383	tags=50%, list=11%, signal=45%	LMNB1/TIAM1/KIF20B/TUBGCP6/CDC42EP2/KIF22/NF1/CEP250/NCK2/ARFGEF1/CEP192/ARHGAP27/MYO1E/RABGAP1/FARP1/ABI1/ANLN/PCNT/SMC3/TBCD/FGD4/ARL8A/ATG4B/CDK1/ITSN1/TTK/DOCK4/MAP1S/PALLD/CLASP1/SORBS2/WASF2/DST/ARHGEF7/RAPGEF6/ARHGAP10/MARK4/SPTAN1/FLNB/ROCK1/EPB41/NEDD9/CTTN/CAPZB/SMC1A/EPB41L2/RANBP9/ABL1/KIF5B/SHROOM1/CKAP5/MAPRE1/CLIP2/TUBGCP5/ARHGEF3/KIF3B/TSC1/TUBA4A/RAB3GAP1/GEMIN4/BCR/TUBGCP3/NIN/B…
HALLMARK_TNFA_SIGNALING_VIA_NFKB	HALLMARK_TNFA_SIGNALING_VIA_NFKB	197	-0.460071	-2.27346	2.45117e-11	6.12792e-10	1.54811e-10	3152	tags=34%, list=15%, signal=29%	MYC/MCL1/TSC22D1/CXCL10/CXCL1/TNIP1/NFKB2/BTG2/EGR1/NAMPT/ZBTB10/RNF19B/MAP3K8/EGR2/LITAF/CXCL2/IL15RA/IL6ST/PTPRE/STAT5A/PLEK/NFKBIA/B4GALT5/F2RL1/PTGER4/TRIB1/PNRC1/KDM6B/TAP1/MAP2K3/KLF2/ETS2/KLF10/SLC2A3/BTG1/REL/PFKFB3/IER2/TLR2/IER5/INHBA/BCL3/PLAU/IRS2/MARCKS/MXD1/PER1/CEBPB/FOS/EHD1/NFIL3/SNN/KYNU/PDE4B/SGK1/ZFP36/SOD2/NFAT5/DENND5A/ICAM1/RELA/CFLAR/BCL6/IRF1/SQSTM1/PLAUR/TNFAIP2
HALLMARK_OXIDATIVE_PHOSPHORYLATION	HALLMARK_OXIDATIVE_PHOSPHORYLATION	183	0.43894	2.29685	5.31911e-11	8.86519e-10	2.23963e-10	1883	tags=33%, list=9%, signal=31%	NDUFA7/MRPL11/UQCR10/UQCR11/NDUFA2/COX6A1/TOMM22/NDUFB7/COX5B/MGST3/COX7A2/NDUFB2/UQCRQ/ATP6V1F/MDH1/MRPS11/MRPS12/NDUFB4/NDUFS3/UQCRH/NDUFA4/ECI1/MRPL15/TIMM9/COX6C/COX7C/ATP6V1G1/COX6B1/NDUFA6/MRPS15/NDUFS6/COX17/TIMM50/NDUFA8/CYB5A/HSD17B10/ACADM/NDUFS8/TIMM10/NDUFC1/NDUFB8/ISCA1/NDUFB5/NDUFA3/COX11/SURF1/TIMM8B/NDUFS4/POLR2F/NDUFB1/NDUFA1/COX7A2L/FXN/HCCS/ACAT1/MRPL34/ATP6V1D/NDUFC2/MAOB/COX7…
HALLMARK_IL6_JAK_STAT3_SIGNALING	HALLMARK_IL6_JAK_STAT3_SIGNALING	87	-0.520672	-2.25525	4.00729e-08	5.00911e-07	1.26546e-07	3232	tags=44%, list=15%, signal=37%	IL18R1/PTPN11/IL4R/IL1R2/STAT1/LEPR/STAT2/ACVRL1/CXCL10/CXCL1/IL10RB/MAP3K8/ITGB3/TNFRSF1A/IL15RA/IL6ST/MYD88/CD9/CCL7/PIK3R5/LTBR/CSF3R/TLR2/PTPN1/IL13RA1/CBL/CSF2RA/TGFB1/CSF2RB/CD14/IRF1/HMOX1/GRB2/TYK2/STAT3/TNFRSF1B/IL1R1/IL17RA
HALLMARK_INFLAMMATORY_RESPONSE	HALLMARK_INFLAMMATORY_RESPONSE	198	-0.408343	-2.01505	7.27853e-08	7.27853e-07	1.83879e-07	4233	tags=37%, list=20%, signal=30%	SLC11A2/RIPK2/P2RY2/IL18RAP/SLAMF1/SCARF1/ABCA1/MSR1/ABI1/IL18R1/APLNR/CDKN1A/KLF6/IL4R/AQP9/NFKB1/ATP2B1/ATP2A2/SLC31A1/BEST1/MYC/CD40/TIMP1/CXCL10/TLR1/GNA15/BTG2/SELL/NAMPT/MET/SGMS2/SCN1B/ITGB3/HIF1A/IL15RA/PTPRE/PSEN1/NFKBIA/PTGER4/FFAR2/RHOG/SLC31A2/LCP2/CCL7/MEFV/FZD5/PIK3R5/FPR1/CSF3R/TLR2/INHBA/NOD2/MXD1/CD55/ROS1/NLRP3/RAF1/PDE4B/LYN/C5AR1/CD14/ICAM1/RELA/ITGA5/CD82/IRF1/TAPBP/PLAUR/TNF…
HALLMARK_COMPLEMENT	HALLMARK_COMPLEMENT	196	-0.401449	-1.98183	1.40827e-07	1.17356e-06	2.96478e-07	4119	tags=33%, list=19%, signal=27%	BRPF3/DOCK9/CD46/HPCAL4/RNF4/GCA/C2/XPNPEP1/SCG3/F10/F8/HNF4A/CALM3/DOCK4/DGKH/CASP9/CALM1/TIMP1/CA2/CXCL1/F2/LIPA/PIK3CA/PREP/PRDM4/CR1/DOCK10/USP8/SPOCK2/PLEK/PSEN1/GPD2/PRCP/LGMN/RHOG/LCP2/KIF2A/WAS/DUSP6/PIK3R5/LTF/SERPINA1/ANXA5/CTSD/CEBPB/CLU/EHD1/CD55/RAF1/KYNU/LYN/LTA4H/LRP1/IRF1/GNB2/FCN1/GRB2/PRKCD/PLAUR/C3/SH2B3/ITGAM/TIMP2/LAMP2/HSPA1A
HALLMARK_APOPTOSIS	HALLMARK_APOPTOSIS	158	-0.403303	-1.94742	3.65102e-06	2.60787e-05	6.58831e-06	3451	tags=33%, list=16%, signal=28%	RNASEL/PRF1/EMP1/CASP9/MCL1/TIMP1/ETF1/F2/GPX3/GNA15/CASP2/BTG2/BCL2L2/DAP/BGN/SPTAN1/XIAP/PPP3R1/PSEN1/ROCK1/RETSAT/NEDD9/TAP1/TGFBR3/PLCB2/BMF/NEFH/TXNIP/ADD1/PPT1/HSPB1/BCL2L11/BCAP31/CTNNB1/LMNA/RARA/CLU/GSN/APP/SOD2/CREBBP/CD14/RELA/CFLAR/PAK1/IRF1/HMOX1/SQSTM1/DPYD/IGF2R/MADD/TIMP2
HALLMARK_COAGULATION	HALLMARK_COAGULATION	137	-0.414875	-1.95292	5.68559e-06	3.55349e-05	8.97724e-06	5178	tags=39%, list=24%, signal=30%	MSRB2/MMP11/APOC1/SPARC/APOA1/HTRA1/MMP1/SH2B2/CFB/MST1/F9/KLF7/CAPN2/P2RY1/VWF/LEFTY2/ACOX2/C2/F10/F8/HNF4A/GDA/CASP9/FGG/TIMP1/CPB2/F2/PREP/USP11/F2RL2/ITGB3/KLK8/PLEK/FURIN/CD9/LGMN/RAC1/DUSP6/MMP9/THBS1/THBD/PLAU/SERPINA1/CLU/GSN/SIRT2/LTA4H/LRP1/GNB2/PECAM1/C3/WDR1/LAMP2
HALLMARK_PI3K_AKT_MTOR_SIGNALING	HALLMARK_PI3K_AKT_MTOR_SIGNALING	103	-0.443564	-1.98967	7.52932e-06	3.77807e-05	9.54459e-06	6461	tags=56%, list=30%, signal=40%	VAV3/LCK/CLTC/CSNK2B/CDKN1B/SFN/DAPP1/ARHGDIA/IL2RG/IRAK4/CDK2/SMAD2/TIAM1/GNGT1/FGF6/FGF17/GSK3B/RIT1/AP2M1/MAPK9/CDKN1A/PTPN11/PRKAR2A/CDK1/MKNK1/NFKBIB/TRAF2/RPTOR/ACTR2/STAT2/RALB/ITPR2/CXCR4/RPS6KA3/PTEN/CAB39/TNFRSF1A/PPP1CA/MYD88/NOD1/MKNK2/MAP2K3/MAPKAP1/CFL1/PRKCB/PLCB1/RAC1/PLCG1/PIKFYVE/MAPK1/RPS6KA1/SLA/TSC2/RAF1/YWHAB/SQSTM1/ARF1/GRB2
HALLMARK_INTERFERON_GAMMA_RESPONSE	HALLMARK_INTERFERON_GAMMA_RESPONSE	195	-0.369445	-1.82242	7.55614e-06	3.77807e-05	9.54459e-06	5065	tags=37%, list=24%, signal=28%	FAS/PSMB9/VCAM1/IRF4/RIPK2/ZBP1/PFKP/PML/LAP3/CFB/PNPT1/MX2/IFIT2/ARID5B/ISOC1/CDKN1A/IL4R/SPPL2A/IFI30/NFKB1/OGFR/TOR1B/HLA-G/STAT1/LATS2/UBE2L6/CD40/STAT2/CXCL10/RNF213/PELI1/PSMB8/RNF31/NAMPT/RAPGEF6/HIF1A/IL15RA/CIITA/MYD88/SAMHD1/NFKBIA/NCOA3/NOD1/TAP1/NLRC5/LCP2/TRIM26/IFNAR2/BTG1/CCL7/TRIM25/TXNIP/HLA-A/FPR1/PTPN1/HLA-DRB1/NUP93/SELP/CSF2RB/RBCK1/ADAR/PDE4B/MVP/SOD2/ZNFX1/CD74/ICAM1/IRF1/P…
HALLMARK_TGF_BETA_SIGNALING	HALLMARK_TGF_BETA_SIGNALING	54	-0.513257	-2.02101	3.34608e-05	0.000152094	3.84239e-05	3886	tags=43%, list=18%, signal=35%	SLC20A1/LEFTY2/JUNB/ARID4B/SMAD1/BMPR1A/SKIL/FKBP1A/ACVR1/PPP1CA/XIAP/FURIN/SMURF2/KLF10/SKI/THBS1/RHOA/PPM1A/CTNNB1/TGFB1/HIPK2/NCOR2/ENG
HALLMARK_HYPOXIA	HALLMARK_HYPOXIA	191	-0.356066	-1.75198	6.63752e-05	0.000276563	6.98686e-05	4154	tags=28%, list=19%, signal=23%	BHLHE40/CDKN1A/SIAH2/KLF6/EFNA3/KLF7/AKAP12/HEXA/TIPARP/PLIN2/XPNPEP1/IDS/PHKG1/LDHA/ETS1/JMJD6/CXCR4/PKP1/SLC6A6/BGN/PPFIA4/GYS1/CCNG2/RBPJ/PGM1/PNRC1/NAGK/ANKZF1/SLC2A3/NDST1/BTG1/TGFBI/PFKFB3/PFKL/GBE1/NDST2/IRS2/HK2/FOS/PDK3/ALDOC/NFIL3/ALDOA/ENO1/ZFP36/CITED2/HK1/NDRG1/HMOX1/HDLBP/PLAUR/GAA/FOXO3/MYH9
HALLMARK_P53_PATHWAY	HALLMARK_P53_PATHWAY	193	-0.338832	-1.66818	0.000152196	0.000585367	0.000147882	3040	tags=26%, list=14%, signal=22%	TSC22D1/DGKA/BLCAP/EPHX1/BTG2/EPHA2/RNF19B/RHBDF2/KIF13B/ABCC5/KLK8/PTPRE/CCP110/TCN2/RETSAT/RAB40C/MKNK2/TAP1/BAIAP2/POM121/WRAP73/GM2A/TAX1BP3/BTG1/ZFP36L1/CCND3/ERCC5/ABAT/TXNIP/PRKAB1/IER5/PLXNB2/SLC3A2/TGFB1/CTSD/MXD1/FOS/ZBTB16/APP/CCNK/XPC/DEF6/NOTCH1/CD82/NDRG1/VDR/HMOX1/CYFIP2/RXRA/FOXO3
HALLMARK_MYC_TARGETS_V1	HALLMARK_MYC_TARGETS_V1	193	0.310802	1.63528	0.000172053	0.000614476	0.000155236	3347	tags=34%, list=16%, signal=29%	PRDX4/SNRPD2/LSM2/DUT/RPS5/RPS10/NME1/SSBP1/MRPL9/PPIA/SRSF3/SNRPD3/TXNL4A/PSMA2/PSMA6/ILF2/SSB/NHP2/ERH/C1QBP/SNRPG/PSMD14/HSPE1/CCT2/LSM7/RPL34/RFC4/RPLP0/RPS2/PA2G4/PCNA/NCBP1/RPL6/EEF1B2/VBP1/PWP1/FBL/EIF1AX/RPS6/COX5A/GNL3/CDK4/RPL14/IMPDH2/TRA2B/RPS3/SERBP1/CLNS1A/PSMA7/SET/RAN/RRP9/NDUFAB1/MRPL23/RSL1D1/SNRPB2/PHB/PSMA4/EXOSC7/ACP1/MCM6/HDDC2/CCNA2/AP3S1/CDC45/RPL22
HALLMARK_KRAS_SIGNALING_UP	HALLMARK_KRAS_SIGNALING_UP	194	-0.336016	-1.65766	0.000285387	0.000951292	0.000240326	5332	tags=35%, list=25%, signal=27%	IL10RA/MAP7/ADAMDEC1/IL1B/MMP11/CCND2/MAP4K1/KIF5C/CD37/MMD/SDCCAG8/CFB/FGF9/TMEM158/BTBD3/AKAP12/IL1RL2/AVL9/TMEM100/SCG3/ITGBL1/KCNN4/PTCD2/EMP1/USH1C/CXCL10/CA2/JUP/ETS1/GADD45G/TMEM176B/CXCR4/PSMB8/BTC/SCN1B/MTMR10/ADGRL4/GABRA3/F2RL1/TRIB1/MAFB/LAT2/DUSP6/MMP9/ST6GAL1/NIN/TLR8/INHBA/EVI5/EPB41L3/CBL/CSF2RA/HKDC1/PLAU/CROT/DNMBP/LCP1/LAPTM5/ABCB1/AKT2/F13A1/PECAM1/ADAM8/PLAUR/TNFRSF1B/ENG/ITG…
HALLMARK_APICAL_JUNCTION	HALLMARK_APICAL_JUNCTION	194	-0.332698	-1.6413	0.000360646	0.00112702	0.00028472	2596	tags=22%, list=12%, signal=20%	GTF2F1/NEXN/SHC1/MVD/MYL9/ACTN3/PTEN/ARHGEF6/CD209/ACTB/EPB41L2/ITGA3/BAIAP2/PTPRC/CLDN9/ACTG1/TGFBI/TSC1/MPZL1/MMP9/INPPL1/PLCG1/FSCN1/YWHAH/ITGB1/IKBKG/MAPK14/ZYX/CAP1/DHX16/RAC2/AKT2/ICAM1/VCL/ACTN1/VCAN/SIRPA/PECAM1/ACTN4/CTNNA1/MSN/SYK/MYH9
HALLMARK_XENOBIOTIC_METABOLISM	HALLMARK_XENOBIOTIC_METABOLISM	196	-0.330079	-1.6295	0.000438067	0.00125682	0.000317512	3755	tags=28%, list=18%, signal=23%	GSR/ETFDH/ACOX2/PINK1/F10/GCKR/HNF4A/ATP2A2/ECH1/CA2/JUP/ALAS1/IDH1/TMEM176B/SLC6A12/EPHX1/EPHA2/SLC6A6/CBR1/MCCC2/PGRMC1/AHCY/TNFRSF1A/DHRS1/CYP1A1/RETSAT/LONP1/FBLN1/ETS2/MTHFD1/ALDH9A1/LPIN2/COMT/CYP2S1/TPST1/CNDP2/NPC1/CROT/GABARAPL1/TMBIM6/CYP27A1/KYNU/PDK4/ALDH2/POR/CES1/AP4B1/HMOX1/ELOVL5/ACO2/PGD/CYFIP2/ABCC3/IL1R1
HALLMARK_DNA_REPAIR	HALLMARK_DNA_REPAIR	140	0.33936	1.67511	0.000452455	0.00125682	0.000317512	4540	tags=40%, list=21%, signal=32%	POLE4/DUT/GTF2A2/RPA3/POLD4/NT5C/NME1/PDE6G/RBX1/DAD1/POLR2H/TAF10/ZNRD1/GTF2H5/APRT/NME3/COX17/ADA/POLR2I/SUPT4H1/TARBP2/SURF1/RFC4/POLR2F/MPG/POLR2G/ZNF707/PCNA/UMPS/POLR1C/PRIM1/IMPDH2/RAD52/POLL/POLR2J/PNP/TAF9/TMED2/VPS37D/NME4/POLR1D/GTF2B/ERCC1/RALA/NPR2/ITPA/TAF12/POLR2D/MRPL40/SNAPC5/GUK1/POLR3GL/GPX4/DDB2/AK1/SAC3D1
HALLMARK_PROTEIN_SECRETION	HALLMARK_PROTEIN_SECRETION	95	-0.392517	-1.7423	0.000553258	0.00145594	0.000367817	4949	tags=45%, list=23%, signal=35%	ARFGEF1/AP2B1/CLCN3/ABCA1/MON2/AP2M1/TSG101/USO1/ATP6V1H/STAM/YKT6/RAB22A/RAB2A/CD63/SEC24D/RAB9A/ADAM10/VPS4B/COPE/RPS6KA3/VAMP3/DST/SCRN1/RAB5A/BET1/ARFGAP3/AP3B1/STX12/GLA/COPB2/SEC31A/GBF1/PPT1/GNAS/MAPK1/ATP1A1/ARCN1/AP1G1/SNAP23/ARF1/IGF2R/LAMP2/KIF1B
HALLMARK_UV_RESPONSE_UP	HALLMARK_UV_RESPONSE_UP	151	-0.350547	-1.67257	0.000640042	0.00160011	0.000404237	4547	tags=33%, list=21%, signal=26%	STIP1/HLA-F/ACAA1/SLC6A8/DGAT1/WIZ/YKT6/TCHH/CDKN2B/JUNB/CYB5R1/CA2/ALAS1/SLC6A12/GPX3/EPHX1/FKBP4/BTG2/ARRB2/NTRK3/CXCL2/IL6ST/CYP1A1/NFKBIA/FURIN/MARK2/RAB27A/TAP1/PRPF3/BTG1/PRKACA/CCND3/TUBA4A/PPT1/BCL2L11/PPIF/NXF1/FOS/TMBIM6/ALDOA/LYN/ABCB1/SOD2/ICAM1/IRF1/HMOX1/HNRNPU/MGAT1/SQSTM1/PRKCD
HALLMARK_UV_RESPONSE_DN	HALLMARK_UV_RESPONSE_DN	139	-0.347993	-1.64631	0.000889572	0.00211803	0.000535081	3251	tags=25%, list=15%, signal=21%	PRDM2/BMPR1A/MYC/COL1A1/KCNMA1/MAP2K5/TGFBR2/FZD2/NIPBL/MET/PTEN/ITGB3/SIPA1L1/GRK5/ATXN1/TGFBR3/DYRK1A/CDK13/CELF2/COL3A1/SCAF8/ATP2B4/ATRX/LTBP1/MAPK14/WDR37/NOTCH2/RUNX1/CITED2/PIK3CD/PHF3/ATRN/RXRA/ABCC1/ZMIZ1
HALLMARK_EPITHELIAL_MESENCHYMAL_TRANSITION	HALLMARK_EPITHELIAL_MESENCHYMAL_TRANSITION	197	-0.319576	-1.5792	0.00107015	0.00243216	0.00061444	5111	tags=33%, list=24%, signal=25%	LAMC2/FAS/VCAM1/SPARC/HTRA1/PTHLH/MMP1/PMP22/ELN/SLC6A8/FERMT2/SERPINE2/COL16A1/SFRP4/FMOD/LAMA2/SNTB1/COL5A3/MEST/COL1A1/FSTL3/COL8A2/ACTA2/TIMP1/FBN2/CXCL1/PLOD3/TPM1/COL4A1/VIM/MYL9/BGN/DST/ITGB3/COL7A1/FBLN2/GAS1/COPA/TPM4/OXTR/TGFBR3/FBLN1/CADM1/COL6A3/TGFBI/COL3A1/ITGB5/THBS1/WIPF1/INHBA/PLOD1/TGFB1/ITGB1/PCOLCE2/FLNA/MYLK/MCM7/QSOX1/BASP1/NOTCH2/LRP1/ITGA5/VCAN/PLAUR/ANPEP
HALLMARK_HEME_METABOLISM	HALLMARK_HEME_METABOLISM	191	-0.32355	-1.59199	0.00157455	0.00342293	0.00086474	5799	tags=41%, list=27%, signal=30%	LMO2/SYNJ1/CDR2/FTCD/ADD2/SNCA/GCLM/CIR1/BMP2K/PPP2R5B/FBXO7/SLC11A2/MKRN1/AQP3/CLCN3/SIDT2/KLF3/UROS/NCOA4/AGPAT4/SLC10A3/SLC6A8/SLC22A4/UCP2/EIF2AK1/ATP6V0A1/HBD/NARF/MPP1/IGSF3/SLC25A37/SPTA1/SLC4A1/TNRC6B/CAST/ALDH1L1/TNS1/CA2/CCDC28A/ERMAP/RANBP10/MARK3/BTG2/DAAM1/FBXO34/EZH1/NFE2L1/SPTB/BACH1/EPB41/BCAM/VEZF1/TRIM58/TAL1/MAP2K3/PIGQ/PSMD9/PICALM/FOXJ2/EPOR/GAPVD1/ALAD/CCND3/ENDOD1/SDCBP/ADD…
HALLMARK_G2M_CHECKPOINT	HALLMARK_G2M_CHECKPOINT	191	-0.320271	-1.57586	0.0021222	0.00442126	0.00111695	3400	tags=27%, list=16%, signal=23%	CDK1/RAD21/SYNCRIP/TTK/TACC3/E2F3/MYC/NUP50/DKC1/GSPT1/POLA2/NCL/KPNA2/MCM3/HIF1A/SRSF2/E2F4/CUL4A/POLE/SMC1A/ABL1/KIF5B/CDC6/CHMP1A/EFNA5/CUL3/TLE3/ATRX/TOP1/PRPF4B/BCL3/HIRA/KPNB1/TGFB1/MARCKS/MCM5/MAPK14/FOXN3/PAFAH1B1/NOLC1/NOTCH2/CUL1/HNRNPD/PRMT5/NUP98/NUMA1/UPF1/ILF3/HNRNPU/CTCF/EWSR1
HALLMARK_E2F_TARGETS	HALLMARK_E2F_TARGETS	194	0.287976	1.51377	0.00248662	0.00497324	0.0012564	3990	tags=31%, list=19%, signal=25%	NAA38/PRDX4/AK2/POLE4/DUT/POP7/RPA3/PTTG1/NME1/CKS2/PRIM2/RAD51C/RAD1/CKS1B/UBE2T/CDKN2C/TIPIN/PHF5A/DCTPP1/CENPM/TUBG1/PPP1R8/GINS4/PA2G4/CSE1L/PCNA/PRPS1/STMN1/CDK4/RNASEH2A/TRA2B/ATAD2/CHEK2/CCNE1/RAN/BIRC5/CDKN3/LYAR/PAICS/HMGB3/E2F8/WDR90/UBE2S/EXOSC8/CBX5/TK1/MCM6/TUBB/BARD1/DEPDC1/CIT/CCNB2/WEE1/EZH2/RANBP1/CDKN2A/KIF4A/HELLS/EIF2S1/MMS22L
HALLMARK_WNT_BETA_CATENIN_SIGNALING	HALLMARK_WNT_BETA_CATENIN_SIGNALING	42	-0.453134	-1.68349	0.00514798	0.00989996	0.00250104	6712	tags=55%, list=31%, signal=38%	TCF7/HEY1/CSNK1E/LEF1/FZD1/NKD1/AXIN1/WNT5B/CCND2/PTCH1/PPARD/TP53/MYC/DLL1/RBPJ/FRAT1/MAML1/CTNNB1/CUL1/NOTCH1/NCSTN/NCOR2/NUMB
HALLMARK_ALLOGRAFT_REJECTION	HALLMARK_ALLOGRAFT_REJECTION	195	-0.29948	-1.47729	0.00651333	0.0120617	0.00304717	4967	tags=35%, list=23%, signal=27%	CCND2/CCL19/FCGR2B/MAP4K1/IRF4/RIPK2/IL18RAP/INHBB/IL12RB1/NCR1/CD47/ABI1/IL4R/CSK/HLA-DOA/C2/PRF1/TRAF2/HLA-G/GLMN/STAT1/LY75/CD40/TIMP1/TLR1/ETS1/F2/IL27RA/GBP2/NCF4/HIF1A/SPI1/HLA-E/APBB1/CCR2/TAP1/IKBKB/PTPRC/TAP2/LCP2/WAS/PRKCB/IFNAR2/CCL7/CCND3/MMP9/HLA-A/EIF3A/TLR2/INHBA/BCL3/TGFB1/FGR/CFP/ITGAL/EIF4G3/FLNA/HCLS1/ELANE/ELF4/NLRP3/IL16/LYN/CD74/ICAM1/PTPN6/TAPBP/ITGB2
HALLMARK_ESTROGEN_RESPONSE_EARLY	HALLMARK_ESTROGEN_RESPONSE_EARLY	194	-0.296201	-1.46124	0.00779078	0.0139121	0.00351464	5265	tags=32%, list=25%, signal=25%	TIAM1/TMPRSS3/KRT19/RBBP8/ELF3/BCL2/P2RY2/INHBB/AQP3/AMFR/B4GALT1/MYOF/SYBU/FARP1/BHLHE40/SLC7A5/SIAH2/AR/TIPARP/MAST4/MUC1/FKBP5/MLPH/SLC27A2/SLC9A3R1/MYC/SLC24A3/LRIG1/CANT1/FKBP4/KAZN/IL6ST/FLNB/AFF1/CBFA2T3/BCL11B/RPS6KA2/MED13L/MPPED2/KLF10/GLA/ELF1/ABAT/ENDOD1/PPIF/WFS1/SLC37A1/ITPK1/KDM4B/RARA/FOS/ALDH3B1/AKAP1/RRP12/ZNF185/SH3BP5/NCOR2/ELOVL5/SLC1A4/SVIL/GAB2/TMEM164/ABHD2
HALLMARK_MYOGENESIS	HALLMARK_MYOGENESIS	198	-0.283134	-1.39718	0.0127586	0.0219976	0.00555729	5410	tags=30%, list=25%, signal=22%	ADCY9/MAPRE3/ACTC1/MB/SPEG/SH2B1/SPARC/KLF5/EPHB3/GABARAPL2/RIT1/BDKRB2/SLC6A8/BHLHE40/APLNR/CDKN1A/OCEL1/SORBS1/SYNGR2/LAMA2/DAPK2/FOXO4/MEF2D/TNNT3/COL1A1/GPX3/MYO1C/ACTN3/ATP2A1/PPFIA4/PRNP/SPTAN1/PDLIM7/IFRD1/TPM3/COL6A3/COL3A1/MYH2/ITGB5/PLXNB2/TGFB1/ITGB1/LSP1/MYLK/CLU/GSN/APP/TSC2/PDE4DIP/SIRT2/NOTCH1/AKT2/ACSL1/FLII/SVIL/ATP6AP1/CKMT2/GAA/MYH9
HALLMARK_IL2_STAT5_SIGNALING	HALLMARK_IL2_STAT5_SIGNALING	194	-0.285843	-1.41014	0.0156585	0.0260975	0.00659306	4967	tags=34%, list=23%, signal=26%	CCND2/IRF4/RRAGD/GALM/TNFSF11/NOP2/GPR83/MYO1E/MAP6/PTCH1/ODC1/SNX9/COCH/IL18R1/BHLHE40/BCL2L1/KLF6/CD81/SYNGR2/IL4R/PLAGL1/PLIN2/IL1R2/MUC1/SPRY4/EMP1/SCN9A/MYC/CXCL10/CA2/LRIG1/PRKCH/MYO1C/SELL/PUS1/MAPKAPK2/MAP3K8/F2RL2/PRNP/AHCY/SMPDL3A/FURIN/NCOA3/HUWE1/FAM126B/WLS/CDC6/SLC2A3/PLEC/CCND3/CYFIP1/HK2/CKAP4/MXD1/SELP/GABARAPL1/HIPK2/NFIL3/ABCB1/DENND5A/NDRG1/AHNAK/IGF2R/TNFRSF1B/ADAM19
HALLMARK_UNFOLDED_PROTEIN_RESPONSE	HALLMARK_UNFOLDED_PROTEIN_RESPONSE	106	-0.318028	-1.43482	0.0260378	0.0417905	0.0105576	3131	tags=25%, list=15%, signal=22%	NFYA/DKC1/PARN/SHC1/DDX10/EEF2/PDIA5/KIF5B/HSPA9/NOP56/CNOT4/BAG3/SEC31A/ATP6V0D1/WIPI1/GEMIN4/CXXC1/WFS1/CEBPB/DCTN1/FUS/NOLC1/HERPUD1/EDC4/EIF4A3/SLC1A4/ERN1
HALLMARK_ADIPOGENESIS	HALLMARK_ADIPOGENESIS	188	-0.280233	-1.37698	0.0267459	0.0417905	0.0105576	4890	tags=35%, list=23%, signal=27%	RAB34/DHRS7/ATL2/UQCRC1/SLC5A6/ABCA1/MGLL/ACOX1/BCL2L13/DGAT1/UCP2/LIFR/CPT2/SORBS1/UBQLN1/PTGER3/FZD4/PLIN2/PHLDB1/ITSN1/ECH1/IDH1/BCKDHA/GHITM/PRDX3/COL4A1/IDH3G/GPX3/AIFM1/ACAA2/ECHS1/STAT5A/ATP1B3/CCNG2/ADIPOR2/RETSAT/RTN3/GPD2/PGM1/ESRRA/YWHAG/ESYT1/PPP1R15B/BAZ2A/DECR1/PFKFB3/PFKL/LPCAT3/GBE1/IMMT/ARAF/CS/MYLK/ALDOA/PPM1B/ALDH2/POR/TKT/TALDO1/BCL6/ACO2/C3/ACLY/APLP2/SLC19A1
HALLMARK_REACTIVE_OXIGEN_SPECIES_PATHWAY	HALLMARK_REACTIVE_OXIGEN_SPECIES_PATHWAY	46	-0.397187	-1.51935	0.0284757	0.043145	0.0108998	4726	tags=57%, list=22%, signal=44%	MGST1/PFKP/HHEX/MSRA/GSR/JUNB/ERCC2/NDUFS2/TXNRD1/TXNRD2/GPX3/EGLN2/OXSR1/IPCEF1/PRNP/CDKN2D/FES/PDLIM1/MPO/SBNO2/LSP1/SCAF4/SOD2/MBP/G6PD/ABCC1
HALLMARK_INTERFERON_ALPHA_RESPONSE	HALLMARK_INTERFERON_ALPHA_RESPONSE	92	-0.333531	-1.46357	0.0308425	0.0446429	0.0112782	5171	tags=33%, list=24%, signal=25%	PARP14/PSMB9/PARP9/RIPK2/LAP3/PNPT1/CD47/IFIT2/IL4R/IFI30/OGFR/UBE2L6/STAT2/CXCL10/MOV10/GBP2/PSMB8/SELL/NUB1/RNF31/UBA7/TAP1/TRIM26/TRIM25/ELF1/TXNIP/ADAR/TMEM140/CD74/IRF1
HALLMARK_MTORC1_SIGNALING	HALLMARK_MTORC1_SIGNALING	193	-0.277093	-1.36422	0.03125	0.0446429	0.0112782	3384	tags=24%, list=16%, signal=21%	ATP2A2/NFKBIB/SLC9A3R1/ACTR2/TXNRD1/LDHA/ETF1/IDH1/RPA1/CXCR4/BTG2/SLC6A6/NAMPT/RAB1A/ADIPOR2/IFRD1/PGM1/PSMC4/CANX/CD9/MAP2K3/LGMN/GLA/HSPA9/CORO1A/SLC2A3/PFKL/TUBA4A/GBE1/IMMT/NUP205/PSME3/CFP/HK2/HSPA4/NFIL3/SLA/NFYC/ALDOA/ENO1/LTA4H/G6PD/ELOVL5/SQSTM1/SLC1A4/ACLY/ITGB2
HALLMARK_CHOLESTEROL_HOMEOSTASIS	HALLMARK_CHOLESTEROL_HOMEOSTASIS	72	-0.34542	-1.44915	0.037037	0.0500501	0.0126442	3075	tags=26%, list=14%, signal=23%	GUSB/ECH1/ATXN2/MVD/CBS/ABCA2/PNRC1/CD9/LGMN/ACTG1/CTNNB1/ACSS2/ANXA5/PDK3/CLU/ALDOC/NFIL3/PLAUR/ANTXR2
HALLMARK_GLYCOLYSIS	HALLMARK_GLYCOLYSIS	197	-0.26917	-1.33012	0.037037	0.0500501	0.0126442	3075	tags=20%, list=14%, signal=18%	GUSB/CLDN3/LDHA/IDH1/CXCR4/FKBP4/MET/GNPDA1/PPFIA4/GYS1/PSMC4/CLDN9/PHKA2/KIF2A/ANKZF1/COPB2/TGFBI/ALDH9A1/EXT2/IL13RA1/PYGB/SLC16A3/TPST1/PLOD1/IRS2/HK2/HOMER1/CHPF2/PDK3/RBCK1/ALDOA/QSOX1/ENO1/CITED2/TALDO1/G6PD/PYGL/VCAN/HDLBP/PGAM1
HALLMARK_FATTY_ACID_METABOLISM	HALLMARK_FATTY_ACID_METABOLISM	155	-0.286916	-1.37842	0.0412844	0.0543216	0.0137233	5667	tags=37%, list=26%, signal=28%	MDH2/HSDL2/SMS/CD1D/ACADL/PDHA1/IL4I1/AQP7/ACSL5/HSD17B11/UROS/MGLL/ACOX1/ACAA1/ODC1/GPD1/FH/ALDH3A1/CPT2/CA6/ETFDH/METAP1/UBE2L6/ECH1/CA2/CA4/LDHA/BMPR1B/IDH1/IDH3G/EPHX1/ACAA2/ECHS1/CBR1/SDHD/TP53INP2/CYP1A1/ADIPOR2/RETSAT/GPD2/DECR1/ALDH9A1/ALAD/DLST/AOC3/CPT1A/IDH3B/YWHAH/GABARAPL1/ALDH1A1/ALDOA/GLUL/ACSL1/HADHB/ELOVL5/ACO2/HSD17B4/SDHA
HALLMARK_HEDGEHOG_SIGNALING	HALLMARK_HEDGEHOG_SIGNALING	35	-0.402277	-1.4482	0.0509338	0.0652997	0.0164968	4979	tags=40%, list=23%, signal=31%	NF1/PML/PTCH1/SLIT1/NRP2/L1CAM/NRCAM/NKX6-1/DPYSL2/ETS2/TLE1/TLE3/RTN1/MYH9
HALLMARK_PEROXISOME	HALLMARK_PEROXISOME	102	-0.294371	-1.3217	0.0727554	0.0909443	0.0229754	5545	tags=35%, list=26%, signal=26%	CTBP1/RXRG/ERCC3/ABCD1/ACSL5/HSD17B11/CRABP1/ACOX1/ACAA1/ESR2/ISOC1/CLN6/ABCC8/SLC23A2/SLC27A2/ECH1/VPS4B/IDH1/ABCC5/PEX5/STS/RETSAT/SIAH1/CNBP/ATXN1/CADM1/ALDH9A1/PABPC1/YWHAH/ALDH1A1/ABCB1/MVP/SOD2/ACSL1/ELOVL5/HSD17B4
HALLMARK_APICAL_SURFACE	HALLMARK_APICAL_SURFACE	43	-0.364391	-1.36203	0.0750853	0.0915675	0.0231328	5865	tags=47%, list=27%, signal=34%	MDGA1/CROCC/IL2RG/DCBLD2/SLC22A12/B4GALT1/EPHB4/RTN4RL1/AFAP1L2/ADAM10/ADIPOR2/GAS1/FLOT2/EFNA5/HSPB1/APP/LYN/PLAUR/SULF2/NCOA6
HALLMARK_ANDROGEN_RESPONSE	HALLMARK_ANDROGEN_RESPONSE	97	-0.294353	-1.30568	0.0888889	0.103892	0.0262464	4613	tags=30%, list=22%, signal=24%	B4GALT1/MAK/NKX3-1/NCOA4/SRF/LIFR/ARID5B/AKAP12/GSR/FKBP5/SEC24D/TSC22D1/BMPR1B/RPS6KA3/ZBTB10/UAP1/PIAS1/TMEM50A/PTK2B/CCND3/XRCC6/STEAP4/SGK1/RRP12/ACTN1/NDRG1/ELOVL5/ZMIZ1/ABHD2
HALLMARK_ANGIOGENESIS	HALLMARK_ANGIOGENESIS	36	-0.374483	-1.35167	0.0893471	0.103892	0.0262464	6390	tags=36%, list=30%, signal=25%	LUM/PRG2/PDGFA/NRP1/PTK2/SERPINA5/CCND2/TIMP1/COL3A1/THBD/APP/LRPAP1/VCAN
HALLMARK_NOTCH_SIGNALING	HALLMARK_NOTCH_SIGNALING	32	-0.382871	-1.35436	0.107383	0.122026	0.0308275	5894	tags=44%, list=27%, signal=32%	FZD1/WNT2/PRKCA/DTX1/FBXW11/PPARD/TCF7L2/DLL1/MAML2/FZD5/DTX2/NOTCH2/CUL1/NOTCH1
HALLMARK_ESTROGEN_RESPONSE_LATE	HALLMARK_ESTROGEN_RESPONSE_LATE	195	-0.208015	-1.0261	0.394933	0.438814	0.110858	5334	tags=28%, list=25%, signal=21%	NAB2/PLAC1/TIAM1/TMPRSS3/KRT19/SNX10/RBBP8/GALE/LAMC2/BCL2/SERPINA5/PRKAR2B/AMFR/MYOF/FARP1/SLC7A5/SIAH2/PTGER3/ACOX2/FKBP5/SLC27A2/GJB3/ST6GALNAC2/MEST/SLC9A3R1/SLC24A3/CA2/ASS1/CXCL14/FKBP4/UNC13B/IL6ST/FLNB/AFF1/RPS6KA2/CD9/CDC6/GLA/ATP2B4/PPIF/LTF/WFS1/ITPK1/SERPINA1/FOS/ALDH3B1/SGK1/ZFP36/NCOR2/PTPN6/ELOVL5/SLC1A4/IMPA2/JAK1/ABHD2
HALLMARK_MYC_TARGETS_V2	HALLMARK_MYC_TARGETS_V2	58	-0.21795	-0.871859	0.665008	0.722835	0.182611	2497	tags=16%, list=12%, signal=14%	PES1/PUS1/NOP56/HK2/MCM5/NOLC1/RRP12/TCOF1/SLC19A1
HALLMARK_PANCREAS_BETA_CELLS	HALLMARK_PANCREAS_BETA_CELLS	40	-0.23131	-0.851009	0.713073	0.758588	0.191643	4604	tags=25%, list=21%, signal=20%	PAK3/INS/ABCC8/GCG/ISL1/PAX6/NKX6-1/MAFB/FOXO1/VDR
HALLMARK_BILE_ACID_METABOLISM	HALLMARK_BILE_ACID_METABOLISM	112	0.182501	0.881101	0.758112	0.7897	0.199503	2105	tags=14%, list=10%, signal=13%	SLC27A5/SOD1/PXMP2/LONP2/PAOX/FDXR/SOAT2/DHCR24/PRDX5/ABCD3/RBP1/KLF1/SLC23A1/PEX19/ABCG8/PEX7
HALLMARK_SPERMATOGENESIS	HALLMARK_SPERMATOGENESIS	132	-0.183229	-0.857611	0.779479	0.795387	0.20094	7366	tags=41%, list=34%, signal=27%	PDHA2/DCC/ADCYAP1/TEKT2/ZC3H14/PHF7/CLGN/SLC2A5/LDHC/CNIH2/TNP1/GAD1/TULP2/PAPOLB/MAST2/NF2/GMCL1/ART3/DMC1/AGFG1/NEK2/ACRV1/NPHP1/IL12RB2/DDX4/PEBP1/MAP7/MEP1B/GRM8/CHFR/SPATA6/ADAD1/TUBA3C/GSG1/TOPBP1/CHRM4/PRKAR2A/SCG3/PHKG2/CDK1/TTK/AKAP4/DNAJB8/TCP11/ALOX15/MLLT10/MLF1/IP6K1/NEFH/RAD17/MTOR/PGS1/TALDO1/TLE4
HALLMARK_KRAS_SIGNALING_DN	HALLMARK_KRAS_SIGNALING_DN	186	0.165365	0.866806	0.840361	0.840361	0.212302	6394	tags=35%, list=30%, signal=25%	STAG3/YPEL1/CD80/GAMT/RGS11/PDK2/RYR2/IRS4/DLK2/PDCD1/PLAG1/PDE6B/COPZ2/CCDC106/PROP1/SLC6A3/HTR1B/EDN2/EDN1/PAX3/KLHDC8A/SLC25A23/ARPP21/BARD1/TSHB/TLX1/AKR1B10/CCNA1/CLPS/TAS2R4/PCDHB1/PTGFR/WNT16/GPR3/SLC30A3/FGFR3/CYP11B2/PNMT/MAGIX/GPRC5C/TG/LFNG/CPB1/SIDT1/ATP4A/NTF3/CNTFR/CLSTN3/FGF16/TFAP2B/MSH5/SNCB/HNF1A/SPHK2/P2RY4/KLK7/IGFBP2/VPREB1/NR6A1/FGGY/AMBN/FSHB/TGM1/TCL1A/NOS1

## Sheet: WE vitamin D3
ID	Description	setSize	enrichmentScore	NES	pvalue	p.adjust	qvalues	rank	leading_edge	core_enrichment
HALLMARK_MITOTIC_SPINDLE	HALLMARK_MITOTIC_SPINDLE	197	-0.558097	-2.47031	1.17071e-17	5.85357e-16	2.09496e-16	3493	tags=44%, list=16%, signal=37%	TUBGCP2/WASF2/ARL8A/ARF6/ARHGAP27/BCAR1/CDK5RAP2/DST/RANBP9/ARHGEF2/KIF3C/ABL1/CYTH2/CENPJ/CKAP5/CEP250/SPTAN1/CEP192/ROCK1/PALLD/CDC42BPA/EZR/FLNA/CEP72/CLIP2/CAPZB/NF1/INCENP/BCR/PLEKHG2/ARHGEF11/KLC1/SPTBN1/STAU1/CSNK1D/FLNB/CDC42EP2/NIN/TUBGCP3/PCNT/FGD6/EPB41/MARCKS/CLASP1/MAPRE1/PCM1/HDAC6/NCK2/GEMIN4/TBCD/TRIO/RABGAP1/ACTN4/ARHGAP4/RAB3GAP1/KIF3B/MAP3K11/NUMA1/TSC1/MID1/VCL/CNTRL/ARHGEF7/C…
HALLMARK_INTERFERON_ALPHA_RESPONSE	HALLMARK_INTERFERON_ALPHA_RESPONSE	92	0.620308	2.98882	1.81824e-16	4.54561e-15	1.62685e-15	3444	tags=54%, list=16%, signal=46%	IFITM1/SAMD9/BST2/RTP4/ISG15/IFI44/LY6E/LPAR6/IFI27/USP18/NCOA7/PARP12/EPSTI1/OAS1/RSAD2/IFI35/DDX60/PSME1/IFI44L/OASL/CMPK2/HERC6/IFIT3/PSMA3/LAMP3/DHX58/MX1/IFIT2/PNPT1/SAMD9L/B2M/GBP4/UBE2L6/EIF2AK2/IRF7/PSME2/SLC25A28/IFIH1/CXCL10/TRIM21/CASP1/OGFR/BATF2/LGALS3BP/TRIM14/TDRD7/PARP9/MOV10/ISG20/PARP14
HALLMARK_OXIDATIVE_PHOSPHORYLATION	HALLMARK_OXIDATIVE_PHOSPHORYLATION	183	0.464241	2.47714	8.59347e-14	1.43225e-12	5.12593e-13	2682	tags=38%, list=13%, signal=33%	COX7A2/MRPL11/NDUFA4/NDUFB2/NDUFA6/MRPL15/NDUFB7/TIMM10/MGST3/COX6A1/COX6C/MRPS15/TIMM50/NDUFAB1/MRPL34/UQCR11/UQCR10/TIMM8B/NDUFS6/COX7C/NDUFS3/UQCRQ/COX7A2L/MRPS11/MRPS12/NDUFA3/COX7B/MDH1/COX5A/COX17/NDUFS8/BAX/TOMM22/NDUFA7/MRPS22/NDUFV2/NDUFA9/NDUFS7/ACAT1/ATP6V1G1/NDUFB4/NDUFB8/ISCA1/NDUFS4/COX8A/NDUFB1/NDUFB5/COX5B/UQCRH/POLR2F/NDUFA5/PHB2/MTX2/SLC25A6/CYB5A/ATP6V1F/NDUFA2/COX4I1/ETFB/UQCR…
HALLMARK_INTERFERON_GAMMA_RESPONSE	HALLMARK_INTERFERON_GAMMA_RESPONSE	195	0.440719	2.35474	4.65089e-13	5.81361e-12	2.08066e-12	2888	tags=39%, list=13%, signal=34%	GZMA/PSMA2/XCL1/BST2/RTP4/ISG15/IFI44/LY6E/GPR18/IFI27/USP18/PARP12/CCL2/VAMP8/EPSTI1/APOL6/TNFSF10/DDX58/IFIT1/MT2A/OAS3/RSAD2/VAMP5/IFI35/DDX60/XAF1/PSME1/IFI44L/OASL/CMPK2/HERC6/CASP3/ZBP1/SERPING1/IFIT3/PSMA3/PNP/GBP6/IL15RA/OAS2/DHX58/CD69/MX1/PTPN2/IFIT2/PNPT1/SOCS1/SAMD9L/B2M/GBP4/UBE2L6/CDKN1A/EIF2AK2/IRF7/PSME2/SLC25A28/TOR1B/CFH/IFIH1/MTHFD2/CXCL10/TRIM21/CASP1/RNF213/OGFR/STAT4/VCAM1/J…
HALLMARK_MYC_TARGETS_V1	HALLMARK_MYC_TARGETS_V1	193	0.395147	2.112	2.27747e-09	2.27747e-08	8.15095e-09	2709	tags=34%, list=13%, signal=30%	NME1/PSMA2/PRDX4/PSMA6/ERH/NDUFAB1/LSM7/PPIA/SNRPD2/SSB/DUT/PTGES3/RPS10/MRPL23/CDK4/PHB/SNRPG/COX5A/TXNL4A/CCT2/HNRNPC/SNRPD3/NHP2/SSBP1/RPL34/RSL1D1/PSMA4/PA2G4/SNRPA1/LSM2/ACP1/GNL3/VBP1/EIF4E/CBX3/PSMD8/SRSF7/EEF1B2/EIF1AX/CLNS1A/SNRPB2/ABCE1/PSMA1/NPM1/PCNA/PHB2/RPL6/HNRNPA1/CDC45/RFC4/SRM/PSMD14/RPLP0/C1QBP/RPS3/SRSF3/SNRPD1/PSMC6/RPL22/STARD7/PSMB2/EIF2S1/SERBP1/HSPE1/SET/NOP16
HALLMARK_UV_RESPONSE_DN	HALLMARK_UV_RESPONSE_DN	139	-0.459461	-1.9637	1.02419e-06	8.53491e-06	3.0546e-06	4853	tags=41%, list=23%, signal=32%	PRKAR2B/DYRK1A/ID1/ADORA2B/CITED2/ATP2C1/AKT3/SFMBT1/DLC1/SMAD7/FYN/MAPK14/TGFBR2/TFPI/CDON/BCKDHB/LAMC1/CDC42BPA/MAP2K5/SYNJ2/SLC7A1/BHLHE40/SCN8A/NR3C1/SCHIP1/ABCC1/CDK13/ANXA4/ATXN1/NFIB/SLC22A18/ATP2B1/WDR37/ITGB3/ATRN/MGLL/RUNX1/MYC/PRDM2/KIT/GRK5/PHF3/MAGI2/SYNE1/SCAF8/PIK3CD/ATRX/PRKCA/ATP2B4/SIPA1L1/NFKB1/IGF1R/PMP22/NIPBL/NOTCH2/ZMIZ1/RXRA
HALLMARK_TNFA_SIGNALING_VIA_NFKB	HALLMARK_TNFA_SIGNALING_VIA_NFKB	197	-0.406017	-1.79716	5.45548e-06	3.89677e-05	1.39463e-05	4481	tags=39%, list=21%, signal=31%	NAMPT/F2RL1/PTGER4/EIF1/TNIP1/NR4A2/IL7R/KLF4/KLF10/PDE4B/CCNL1/AREG/IL18/BTG2/IER5/FOSL2/IFNGR2/PPP1R15A/TGIF1/CXCL1/PTX3/B4GALT1/MAP2K3/RELA/GFPT2/TSC22D1/ZFP36/BHLHE40/MXD1/TNC/TLR2/ATP2B1/KLF6/BCL2A1/PNRC1/BTG1/CD44/MYC/TNFAIP2/NFAT5/MARCKS/PLAUR/EDN1/KYNU/ETS2/IER2/NFE2L2/BCL3/ICAM1/SLC2A3/LITAF/NINJ1/NFIL3/SNN/REL/EGR1/PFKFB3/PER1/NFKBIA/PTPRE/CEBPB/SGK1/TRIB1/DENND5A/B4GALT5/KLF2/STAT5A/PM…
HALLMARK_ESTROGEN_RESPONSE_EARLY	HALLMARK_ESTROGEN_RESPONSE_EARLY	194	-0.398865	-1.76458	1.63475e-05	0.000102172	3.65667e-05	4704	tags=36%, list=22%, signal=28%	SLC1A1/TOB1/AKAP1/MSMB/BAG1/PPIF/TPD52L1/AMFR/ADCY1/BCL11B/AQP3/DLC1/KLF4/FAM102A/KLF10/KAZN/DHCR7/AREG/CANT1/MYOF/ALDH3B1/MAPT/ITPK1/FASN/TGM2/REEP1/MED13L/SLC7A5/SFN/LRIG1/ELOVL5/B4GALT1/SLC39A6/ELF1/AR/CELSR1/CELSR2/ABLIM1/SH3BP5/BHLHE40/SLC9A3R1/FLNB/KRT18/CD44/MYC/PAPSS2/ADCY9/RARA/ZNF185/FKBP5/RAPGEFL1/RRP12/MAST4/WFS1/P2RY2/RPS6KA2/SLC24A3/GLA/IGF1R/SCARB1/INHBB/GAB2/ABHD2/CBFA2T3/TMEM164/…
HALLMARK_COAGULATION	HALLMARK_COAGULATION	137	-0.426555	-1.82153	3.58079e-05	0.000198933	7.11969e-05	3378	tags=31%, list=16%, signal=26%	PF4/CFD/C1R/DPP4/F12/MST1/GP9/FN1/F13B/KLF7/LRP1/CLU/GNG12/GNB2/FURIN/USP11/RAC1/WDR1/C3/MMP8/ITGB3/CTSB/TFPI2/PROS1/SPARC/SERPINA1/CD9/SERPINC1/CTSK/SIRT2/SH2B2/LTA4H/HTRA1/VWF/PROC/PLAU/CASP9/LAMP2/THBD/GSN/PECAM1/MMP9
HALLMARK_TGF_BETA_SIGNALING	HALLMARK_TGF_BETA_SIGNALING	54	-0.522499	-1.92349	0.000168777	0.000843887	0.000302023	4125	tags=41%, list=19%, signal=33%	APC/SMAD7/KLF10/CDH1/IFNGR2/PPP1R15A/SMURF1/TGIF1/SMURF2/HDAC1/FURIN/ENG/SPTBN1/XIAP/ACVR1/CDK9/CDKN1C/RHOA/SKI/PMEPA1/HIPK2/NCOR2
HALLMARK_P53_PATHWAY	HALLMARK_P53_PATHWAY	193	-0.369689	-1.6347	0.000278077	0.00126398	0.000452373	4703	tags=35%, list=22%, signal=28%	DEF6/TOB1/TRAF4/ZMAT3/RAB40C/ALOX15B/EPHX1/TPD52L1/IFI30/KLF4/SP1/ABHD4/BTG2/IER5/TM4SF1/HMOX1/PRKAB1/TGFA/PLXNB2/PPM1D/CTSF/RRP8/PPP1R15A/SLC35D1/CTSD/SFN/CSRNP2/FUCA1/CDK5R1/CLCA2/POLH/LRMP/TSC22D1/CCNK/PITPNC1/TP53/APAF1/MXD1/MDM2/CYFIP2/ZBTB16/GM2A/BTG1/POM121/HDAC3/IP6K2/ERCC5/TSPYL2/NINJ1/TXNIP/XPC/FOXO3/PTPRE/ACVR1B/APP/NDRG1/BAIAP2/NOTCH1/KIF13B/INHBB/ITGB4/ZFP36L1/CD82/ABCC5/VDR/ABAT/MKN…
HALLMARK_IL6_JAK_STAT3_SIGNALING	HALLMARK_IL6_JAK_STAT3_SIGNALING	87	-0.442367	-1.77742	0.000320178	0.00133407	0.000477458	3650	tags=34%, list=17%, signal=29%	HMOX1/CRLF2/PDGFC/PF4/IFNGR2/CXCL1/GRB2/TLR2/EBI3/ITGB3/TNFRSF21/TNFRSF1B/CD44/CD9/IL18R1/TYK2/IL1R2/LEPR/STAT3/IL3RA/IL4R/ACVR1B/PTPN1/CSF2RA/IL13RA1/CSF3R/CD14/IL1R1/CBL/IL17RA
HALLMARK_PROTEIN_SECRETION	HALLMARK_PROTEIN_SECRETION	95	-0.435822	-1.77617	0.000352144	0.0013544	0.000484732	3379	tags=34%, list=16%, signal=29%	SGMS1/DST/AP3B1/AP2M1/SNAP23/STX16/RPS6KA3/STX12/SEC24D/TSG101/ADAM10/KRT18/RAB22A/CLCN3/ATP1A1/ARCN1/PAM/COPB2/PPT1/STAM/ATP7A/SEC31A/GBF1/ARFGAP3/SCRN1/LAMP2/GLA/MAPK1/IGF2R/GNAS/KIF1B/AP1G1
HALLMARK_MYOGENESIS	HALLMARK_MYOGENESIS	198	-0.358171	-1.58657	0.000890938	0.00318192	0.00113879	4436	tags=29%, list=21%, signal=23%	BAG1/GNAO1/TEAD4/TPD52L1/TSC2/CNN3/ITGB1/CKB/MYH2/MYL1/SORBS1/MRAS/FOXO4/PSEN2/PLXNB2/REEP1/CFD/PICK1/MYH3/SPTAN1/FST/MYH11/CLU/CRAT/ABLIM1/IFRD1/BHLHE40/MYBPH/SCHIP1/AEBP1/KLF5/MYO1C/SMTN/ITGB5/GPX3/SPARC/AKT2/ADCY9/ATP6AP1/TPM3/PDLIM7/MYLK/PDE4DIP/SIRT2/APP/GAA/ACSL1/FLII/MEF2D/LSP1/NOTCH1/ITGB4/PFKM/DAPK2/GSN/SVIL/MYH9
HALLMARK_HYPOXIA	HALLMARK_HYPOXIA	191	-0.358032	-1.58055	0.00135502	0.00451674	0.00161652	3705	tags=36%, list=17%, signal=30%	PPFIA4/PFKP/TIPARP/DUSP1/AK4/PLIN2/ENO3/DPYSL4/NEDD4L/DCN/PIM1/ADORA2B/CITED2/CP/B4GALNT2/AMPD3/ADM/HS3ST1/FOSL2/GYS1/HMOX1/KIF5A/HSPA5/TGM2/RRAGD/PPP1R15A/CHST2/PDK3/ENO1/KLF7/HDLBP/HK1/ZFP36/ANKZF1/BHLHE40/NR3C1/ETS1/ALDOA/CCNG2/KLF6/PNRC1/BTG1/PLAUR/AKAP12/CDKN1C/PAM/SLC2A3/ATP7A/CXCR4/NFIL3/PFKFB3/ALDOC/FBP1/HK2/FOXO3/GAA/PRKCA/NDRG1/RBPJ/IDS/GPI/TGFBI/SLC6A6/IRS2/SCARB1/NDST1/GBE1/PGM1/MYH9
HALLMARK_COMPLEMENT	HALLMARK_COMPLEMENT	196	-0.339352	-1.49954	0.00240259	0.00748762	0.00267978	3592	tags=29%, list=17%, signal=24%	F5/DOCK10/PIK3CG/HSPA5/SH2B3/C1R/CTSD/DPP4/CXCL1/CDK5R1/BRPF3/GP9/PLA2G7/FN1/LTF/PCLO/ANXA5/LRP1/CLU/GRB2/CBLB/GNB2/LCP2/C3/PSEN1/MMP8/RAF1/CR1/PHEX/CR2/CTSB/TFPI2/ZEB1/PLAUR/SERPINA1/KYNU/SERPINC1/RNF4/GATA3/CD55/FCN1/SPOCK2/DGKG/LTA4H/CEBPB/STX4/GNAI3/PRKCD/LYN/PRCP/CASP9/LAMP2/GNAI2/ITGAM/HSPA1A/TIMP2/EHD1
HALLMARK_INFLAMMATORY_RESPONSE	HALLMARK_INFLAMMATORY_RESPONSE	198	-0.345082	-1.52859	0.00255206	0.00748762	0.00267978	4018	tags=31%, list=19%, signal=26%	IL7R/ADM/PDE4B/IL18/BTG2/SLC11A2/BDKRB1/SELE/PVR/IFNGR2/CHST2/IL18RAP/IRAK2/MEFV/TLR1/RELA/BEST1/SLC7A1/NOD2/AQP9/MXD1/LCP2/ITGA5/PSEN1/TLR2/ATP2B1/RAF1/FPR1/KLF6/EBI3/ITGB3/PROK2/SLC31A1/TNFRSF1B/MYC/TAPBP/PLAUR/EDN1/IL18R1/ICAM1/SLC31A2/HIF1A/CD55/NFKBIA/ATP2A2/PTPRE/GNAI3/IL4R/ACVR1B/NLRP3/P2RY2/SGMS2/LYN/PTAFR/NFKB1/CSF3R/CD14/IL1R1/CD82/C5AR1/KIF1B/SEMA4D
HALLMARK_DNA_REPAIR	HALLMARK_DNA_REPAIR	140	0.297634	1.52324	0.00269554	0.00748762	0.00267978	2750	tags=28%, list=13%, signal=24%	NME1/POLR2H/POLR2I/POLE4/DUT/RBX1/POLR2J/COX17/NFX1/CMPK2/NME3/RPA3/GTF2A2/SUPT4H1/ITPA/PNP/NT5C/ERCC1/ZNRD1/NUDT21/TAF10/TAF9/POLR2F/PCNA/DGUOK/POLR3GL/RFC4/MRPL40/SAC3D1/APRT/MPG/TMED2/POLR2K/DAD1/EDF1/POLR1D/POLR1C/RRM2B/RAD51
HALLMARK_HEDGEHOG_SIGNALING	HALLMARK_HEDGEHOG_SIGNALING	35	-0.51272	-1.71943	0.00286829	0.00754814	0.00270144	2928	tags=34%, list=14%, signal=30%	CDK5R1/CELSR1/AMOT/NF1/GLI1/DPYSL2/ETS2/HEY1/TLE1/RTN1/TLE3/MYH9
HALLMARK_WNT_BETA_CATENIN_SIGNALING	HALLMARK_WNT_BETA_CATENIN_SIGNALING	42	-0.499155	-1.74139	0.00410449	0.0102612	0.00367244	4388	tags=38%, list=20%, signal=30%	LEF1/HDAC11/WNT6/PSEN2/WNT1/MAML1/FZD1/TP53/MYC/HEY1/NCSTN/RBPJ/NOTCH1/NUMB/FRAT1/NCOR2
HALLMARK_APICAL_JUNCTION	HALLMARK_APICAL_JUNCTION	194	-0.331071	-1.46466	0.00452556	0.0107751	0.00385637	4048	tags=32%, list=19%, signal=26%	LAMB3/THY1/PLCG1/RSU1/NFASC/KCNH2/CLDN9/MAP4K2/MPZL2/CNN2/AKT3/ALOX15B/EXOC4/ITGB1/VASP/PDZD3/MAPK14/CDH1/IKBKG/CLDN5/PARVA/TRO/YWHAH/NLGN3/B4GALT1/NF2/MADCAM1/LAMC2/ZYX/CRAT/NF1/CTNND1/ADAM23/TMEM8B/DHX16/PTPRC/THBS3/CAP1/INPPL1/AKT2/ICAM1/ACTN4/ACTN1/STX4/TSC1/CTNNA1/VWF/RAC2/BAIAP2/VCAN/VCL/SIRPA/FSCN1/TGFBI/MPZL1/ITGB4/MSN/GNAI2/PECAM1/SYK/MMP9/MYH9
HALLMARK_E2F_TARGETS	HALLMARK_E2F_TARGETS	194	0.260478	1.39114	0.00481858	0.0109513	0.00391942	5019	tags=37%, list=23%, signal=28%	UBE2S/NME1/PRDX4/NAA38/DCTPP1/POLE4/DUT/CDK4/CKS2/RPA3/PDS5B/BARD1/PA2G4/LYAR/STMN1/CDKN2C/NUDT21/CKS1B/PCNA/CSE1L/LUC7L3/AK2/CDKN1A/TUBB/RAD51C/CDKN3/ANP32E/SPC25/MTHFD2/WDR90/BUB1B/TFRC/EIF2S1/PRIM2/HMGA1/MELK/PSIP1/PTTG1/CDC25A/PHF5A/CENPM/RPA2/RAN/USP1/SMC6/ASF1A/DEPDC1/TBRG4/IPO7/NAP1L1/CIT/TCF19/DIAPH3/UBE2T/DLGAP5/DEK/TRA2B/RAD1/EXOSC8/PLK1/CENPE/CCNE1/CDK1/HMMR/ORC6/MYBL2/DSCC1/TOP2A/ATAD…
HALLMARK_IL2_STAT5_SIGNALING	HALLMARK_IL2_STAT5_SIGNALING	194	-0.321426	-1.42199	0.00996206	0.0216566	0.0077508	2376	tags=21%, list=11%, signal=19%	FURIN/BHLHE40/MXD1/ANXA4/PLEC/SPP1/KLF6/TNFRSF21/MYO1C/TNFRSF1B/GLIPR2/CD44/MYC/CDKN1C/IRF4/SERPINC1/IL18R1/TNFRSF8/SLC2A3/NFIL3/CYFIP1/IL1R2/POU2F1/AHNAK/NCOA3/HK2/FAM126B/IL3RA/RABGAP1L/IL4R/GABARAPL1/DENND5A/IL1RL1/NDRG1/HUWE1/CKAP4/IGF1R/HIPK2/IGF2R/WLS/ADAM19
HALLMARK_KRAS_SIGNALING_UP	HALLMARK_KRAS_SIGNALING_UP	194	-0.316056	-1.39823	0.0130805	0.0272511	0.00975304	5283	tags=32%, list=25%, signal=24%	DUSP6/WDR33/G0S2/SCN1B/CA2/FGF9/LAPTM5/CDADC1/EMP1/ANKH/MPZL2/TLR8/GPNMB/F2RL1/STRN/MAFB/HKDC1/SDCCAG8/ETV5/IL7R/KLF4/IL1RL2/TFPI/MAP7/PPP1R15A/MYCN/SATB1/AVL9/FUCA1/GADD45G/GFPT2/TOR1AIP2/EPB41L3/ENG/ETS1/KIF5C/SPP1/NIN/IKZF1/ARG1/TNFRSF1B/IGF2/LAT2/PLAUR/AKAP12/AKT2/CXCR4/ST6GAL1/MTMR10/F13A1/RABGAP1L/TRIB1/CSF2RA/PLAU/LCP1/DNMBP/DOCK2/CBL/PECAM1/MMP9/ADAM8/ITGB2
HALLMARK_APICAL_SURFACE	HALLMARK_APICAL_SURFACE	43	-0.467622	-1.6372	0.0145164	0.02738	0.00979915	3109	tags=37%, list=15%, signal=32%	FLOT2/SLC34A3/B4GALT1/GHRL/PKHD1/TMEM8B/ADAM10/CROCC/PLAUR/AFAP1L2/GATA3/APP/EPHB4/LYN/NCOA6/SULF2
HALLMARK_ADIPOGENESIS	HALLMARK_ADIPOGENESIS	188	-0.314221	-1.38223	0.0150673	0.02738	0.00979915	3941	tags=29%, list=18%, signal=24%	PRDX3/ESYT1/DHCR7/ADCY6/HIBCH/CD302/SORBS1/DLAT/BCKDHA/NMT1/DECR1/UBQLN1/SDHC/DGAT1/MCCC1/UBC/CRAT/RTN3/RREB1/ENPP2/C3/ALDOA/IMMT/CAT/DBT/CCNG2/PTCD3/MGLL/PTGER3/TST/GPX3/CD151/SLC27A1/BAZ2A/AIFM1/MYLK/PFKFB3/LPCAT3/POR/ORM1/STAT5A/ACO2/APLP2/CS/PPM1B/ALDH2/SCARB1/BCL6/SLC19A1/GBE1/TALDO1/ACOX1/TKT/ACLY/PGM1
HALLMARK_ANGIOGENESIS	HALLMARK_ANGIOGENESIS	36	-0.477054	-1.6116	0.015248	0.02738	0.00979915	8367	tags=64%, list=39%, signal=39%	VAV2/JAG1/PRG2/NRP1/MSX1/KCNJ8/TIMP1/FSTL1/PDGFA/STC1/PTK2/SLCO2A1/FGFR1/POSTN/PF4/PGLYRP1/SPP1/TNFRSF21/APOH/LRPAP1/APP/VCAN/THBD
HALLMARK_G2M_CHECKPOINT	HALLMARK_G2M_CHECKPOINT	191	-0.321675	-1.42005	0.0153328	0.02738	0.00979915	3793	tags=28%, list=18%, signal=23%	NCL/RACGAP1/PRMT5/MAPK14/MKI67/GSPT1/MCM3/SLC7A5/WRN/ABL1/HMGB3/AMD1/MCM5/NUP50/SYNCRIP/CHAF1A/KPNA2/NOLC1/TACC3/INCENP/SLC7A1/EGF/CUL3/KPNB1/DKC1/ODF2/FANCC/POLE/MYC/MARCKS/EWSR1/E2F3/CTCF/BCL3/TOP1/HIF1A/ILF3/PRPF4B/RBM14/NUP98/HNRNPD/RPS6KA5/NUMA1/FOXN3/ATRX/CBX1/HIRA/SMC1A/PAFAH1B1/UPF1/NOTCH2/TLE3/HNRNPU
HALLMARK_APOPTOSIS	HALLMARK_APOPTOSIS	158	-0.321583	-1.39145	0.0182482	0.0314624	0.0112602	3921	tags=34%, list=18%, signal=28%	GPX1/BCAP31/DCN/IRF1/WEE1/EMP1/ANKH/LEF1/SMAD7/ETF1/IL18/BTG2/HMOX1/BCL2L2/PSEN2/GSTM1/GSR/SATB1/SPTAN1/ROCK1/CLU/RELA/RNASEL/HGF/CASP2/ADD1/XIAP/DPYD/PSEN1/KRT18/PLCB2/CD44/GPX3/TSPO/DNAJC3/RARA/PPT1/IGFBP6/TXNIP/NEFH/APP/MADD/CFLAR/PAK1/BCL2L11/LMNA/CASP9/SOD2/CD14/IGF2R/GSN/CREBBP/TIMP2
HALLMARK_PI3K_AKT_MTOR_SIGNALING	HALLMARK_PI3K_AKT_MTOR_SIGNALING	103	-0.356504	-1.47187	0.0198485	0.0330808	0.0118394	3099	tags=25%, list=14%, signal=22%	SFN/PPP2R1B/CAB39/AP2M1/MAP2K3/RPS6KA1/GRB2/MAPK8/RPS6KA3/RAC1/MKNK1/MAPKAP1/RPTOR/RAF1/ITPR2/RIPK1/ACACA/RALB/CXCR4/SLA/PRKCB/GSK3B/MAPK1/YWHAB/PLCB1/MKNK2
HALLMARK_HEME_METABOLISM	HALLMARK_HEME_METABOLISM	191	-0.312901	-1.38132	0.0214153	0.0345409	0.012362	5510	tags=37%, list=26%, signal=28%	CTNS/ABCG2/MOCOS/TAL1/E2F2/VEZF1/TRIM58/CA2/DCAF10/NNT/CDR2/BACH1/MKRN1/CTSE/ERMAP/SPTA1/FTCD/SYNJ1/NCOA4/FBXO7/AQP3/CCDC28A/CIR1/BTG2/MARK3/RANBP10/SNCA/SLC11A2/BTRC/PICALM/NARF/NFE2/TNRC6B/MFHAS1/MAP2K3/ADD2/FBXO34/ALAD/MPP1/LRP10/TNS1/FBXO9/ADD1/NR3C1/C3/CAT/MBOAT2/SIDT2/DAAM1/CTSB/RBM5/ALDH6A1/CLCN3/CAST/EPB41/EZH1/BMP2K/XPO7/SPTB/TOP1/SDCBP/GAPVD1/LPIN2/FOXO3/FOXJ2/ATP6V0A1/LAMP2/AGPAT4/KHNY…
HALLMARK_REACTIVE_OXIGEN_SPECIES_PATHWAY	HALLMARK_REACTIVE_OXIGEN_SPECIES_PATHWAY	46	-0.416377	-1.48893	0.0333797	0.0521558	0.0186663	3467	tags=39%, list=16%, signal=33%	SRXN1/GSR/G6PD/TXNRD1/PDLIM1/ABCC1/CAT/MPO/GPX3/SCAF4/FES/IPCEF1/SBNO2/MBP/LSP1/OXSR1/SOD2/MSRA
HALLMARK_CHOLESTEROL_HOMEOSTASIS	HALLMARK_CHOLESTEROL_HOMEOSTASIS	72	-0.364188	-1.41477	0.0426099	0.0645604	0.0231058	4150	tags=32%, list=19%, signal=26%	HMGCR/STARD4/DHCR7/GSTM2/FASN/NSDHL/PDK3/ANXA5/CLU/LSS/PNRC1/CHKA/TP53INP1/PLAUR/CD9/GUSB/CXCL16/NFIL3/ACSS2/ALDOC/CBS/ATXN2/ANTXR2
HALLMARK_ANDROGEN_RESPONSE	HALLMARK_ANDROGEN_RESPONSE	97	-0.331586	-1.35817	0.05	0.0735294	0.0263158	4695	tags=35%, list=22%, signal=27%	AZGP1/ANKH/FADS1/NCOA4/HMGCR/UBE2I/STEAP4/MAP7/GSR/ELOVL5/B4GALT1/APPBP2/CDC14B/TSC22D1/SRF/MAF/RPS6KA3/SEC24D/MAK/ARID5B/SORD/AKAP12/CAMKK2/FKBP5/XRCC6/RRP12/ACTN1/PIAS1/GNAI3/SGK1/NDRG1/PMEPA1/ABHD2/ZMIZ1
HALLMARK_GLYCOLYSIS	HALLMARK_GLYCOLYSIS	197	-0.291312	-1.28944	0.0525701	0.0735294	0.0263158	4958	tags=30%, list=23%, signal=23%	AK4/ANG/PKP2/CLDN9/DPYSL4/NT5E/CHPF2/DCN/FBP2/ADORA2B/CITED2/NASP/PGAM1/DLD/LHPP/GYS1/GALE/TGFA/NSDHL/HSPA5/RRAGD/CHST2/DSC2/NOL3/HOMER1/B4GALT1/SDHC/G6PD/PDK3/ENO1/HDLBP/SLC25A13/GMPPB/ANKZF1/PYGB/ALDH7A1/ALDOA/PAXIP1/CD44/GOT2/PAM/GUSB/COPB2/CXCR4/GNE/HK2/EXT2/ALDH9A1/PLOD1/IL13RA1/VCAN/SLC16A3/TPST1/TGFBI/QSOX1/IRS2/TALDO1/PHKA2/PYGL
HALLMARK_XENOBIOTIC_METABOLISM	HALLMARK_XENOBIOTIC_METABOLISM	196	-0.291746	-1.28918	0.0529412	0.0735294	0.0263158	3268	tags=22%, list=15%, signal=19%	BCAR1/SLC35D1/NMT1/GSR/ACOX3/ELOVL5/SPINT2/PDK4/DHRS1/AQP9/NDRG2/SLC22A1/CAT/CYP2S1/NPC1/CYFIP2/ARG1/PROS1/UPB1/SLC12A4/AP4B1/KYNU/PAPSS2/ETS2/NINJ1/NFS1/FBP1/ATP2A2/LPIN2/CYP4F2/ALDH9A1/GABARAPL1/POR/ACO2/ABCC3/PGD/TPST1/ALDH2/SLC6A6/CYP27A1/IL1R1/ACOX1/TMBIM6
HALLMARK_UV_RESPONSE_UP	HALLMARK_UV_RESPONSE_UP	151	-0.297099	-1.27876	0.0743902	0.100527	0.0359782	6352	tags=40%, list=30%, signal=29%	SLC6A12/ALAS1/OLFM1/BID/TGFBRAP1/SQSTM1/E2F5/IL6ST/PRKACA/PDLIM3/PDAP1/EIF5/TYRO3/FMO1/KCNH2/CA2/HSPA2/IRF1/PARP2/PPIF/EPHX1/NXF1/C4BPB/AQP3/CDC5L/CLCN2/BTG2/ACAA1/HMOX1/ARRB2/MAPK8IP2/NTRK3/NPTXR/CHRNA5/STIP1/LHX2/AMD1/GLS/HLA-F/DGAT1/FURIN/ALDOA/MARK2/RAB27A/CHKA/BTG1/TST/CYB5R1/GPX3/WIZ/CDKN1C/PPT1/ICAM1/NFKBIA/BCL2L11/PRKCD/LYN/SOD2/HNRNPU/TUBA4A/TMBIM6
HALLMARK_MTORC1_SIGNALING	HALLMARK_MTORC1_SIGNALING	193	-0.282066	-1.24724	0.0841121	0.110674	0.0396096	4561	tags=28%, list=21%, signal=22%	FADS1/HSPA4/NAMPT/HSPD1/CORO1A/HMGCR/STARD4/NUP205/IFI30/ETF1/DHCR7/BTG2/RAB1A/HSPA5/PPP1R15A/NMT1/GSR/SLC7A5/STIP1/ELOVL5/CANX/G6PD/ENO1/HSPA9/MAP2K3/TXNRD1/IFRD1/BHLHE40/SLC9A3R1/ALDOA/IMMT/SORD/NFYC/CD9/SLC2A3/ACACA/CXCR4/NFIL3/HK2/SLA/ATP2A2/LTA4H/SSR1/GSK3B/RPA1/CFP/GPI/SLC6A6/GLA/GBE1/ACLY/TUBA4A/PGM1/ITGB2
HALLMARK_MYC_TARGETS_V2	HALLMARK_MYC_TARGETS_V2	58	0.289816	1.26006	0.10566	0.135462	0.0484811	4350	tags=40%, list=20%, signal=32%	DCTPP1/WDR43/CDK4/PHB/PA2G4/GNL3/CBX3/NOC4L/NPM1/SRM/NIP7/HSPE1/NDUFAF4/NOP16/IMP4/RRP9/GRWD1/TBRG4/EXOSC5/MRTO4/WDR74/PLK1/PRMT3
HALLMARK_NOTCH_SIGNALING	HALLMARK_NOTCH_SIGNALING	32	-0.399638	-1.32042	0.135493	0.169367	0.0606155	3565	tags=31%, list=17%, signal=26%	DTX4/PSEN2/TCF7L2/DTX2/FBXW11/FZD1/NOTCH3/PRKCA/NOTCH1/NOTCH2
HALLMARK_EPITHELIAL_MESENCHYMAL_TRANSITION	HALLMARK_EPITHELIAL_MESENCHYMAL_TRANSITION	197	-0.2679	-1.18581	0.149533	0.178648	0.0639373	3846	tags=21%, list=18%, signal=17%	COPA/AREG/EFEMP2/VEGFC/FERMT2/TGM2/FBLN2/PVR/LAMC1/PLOD3/DST/LOXL1/CXCL1/PTX3/FUCA1/FN1/FLNA/LAMC2/LRP1/NID2/ITGA5/TNC/SPP1/ITGB3/TFPI2/CD44/ITGB5/PLAUR/SPARC/MYLK/PLOD1/HTRA1/PMEPA1/VCAN/TGFBI/QSOX1/PMP22/NOTCH2/ANPEP/VIM/BASP1
HALLMARK_PEROXISOME	HALLMARK_PEROXISOME	102	-0.295147	-1.21431	0.150065	0.178648	0.0639373	6024	tags=35%, list=28%, signal=25%	RETSAT/VPS4B/ABCB4/ABCD1/HSD17B11/ESR2/ACSL5/CLN8/ABCB9/SMARCC1/FADS1/CACNA1B/NUDT19/PEX13/ABCD3/ALDH1A1/RXRG/ACAA1/CNBP/YWHAH/SIAH1/ELOVL5/PEX6/SEMA3C/CRAT/HSD17B4/ATXN1/CAT/TSPO/ALDH9A1/ACSL1/PABPC1/SOD2/ACOX1/MVP/ABCC5
HALLMARK_BILE_ACID_METABOLISM	HALLMARK_BILE_ACID_METABOLISM	112	-0.260105	-1.08806	0.303299	0.352674	0.12622	4027	tags=27%, list=19%, signal=22%	RBP1/ABCD1/BCAR3/HSD17B11/ACSL5/SLC29A1/FADS1/DIO2/PEX13/ABCD3/ALDH8A1/ALDH1A1/RXRG/PEX12/PEX6/AGXT/AR/AMACR/HSD17B4/AQP9/ATXN1/SLC22A18/CAT/NPC1/BMP6/ALDH9A1/ACSL1/CYP27A1/PFKM/RXRA
HALLMARK_ESTROGEN_RESPONSE_LATE	HALLMARK_ESTROGEN_RESPONSE_LATE	195	-0.243183	-1.07546	0.324356	0.368586	0.131915	4987	tags=28%, list=23%, signal=21%	CA2/SLC29A1/PRKAR2B/ALDH3A2/TRIM29/TOB1/PTPN6/BAG1/PPIF/TPD52L1/AMFR/CKB/KLF4/FAM102A/DHCR7/AREG/CDH1/GALE/MYOF/ALDH3B1/MAPT/ITPK1/SLC7A5/SFN/ELOVL5/LTF/LAMC2/ZFP36/CELSR2/CACNA2D2/SLC9A3R1/FLNB/ST6GALNAC2/PTGER3/TFPI2/CD44/SORD/TST/SERPINA1/PAPSS2/CD9/FKBP5/RAPGEFL1/SGK1/WFS1/RPS6KA2/ATP2B4/JAK1/SLC24A3/IMPA2/GLA/SCARB1/ABHD2/NCOR2
HALLMARK_UNFOLDED_PROTEIN_RESPONSE	HALLMARK_UNFOLDED_PROTEIN_RESPONSE	106	-0.251989	-1.04507	0.374522	0.416136	0.148933	3500	tags=25%, list=16%, signal=21%	PARN/HSPA5/DCTN1/SLC7A5/HSPA9/NOLC1/KHSRP/EDC4/DKC1/PDIA5/ALDH18A1/NFYA/DNAJC3/NOP14/GEMIN4/TSPYL2/SEC31A/CNOT4/CEBPB/SSR1/DCP1A/HERPUD1/WFS1/WIPI1/ERN1/EIF4A3
HALLMARK_ALLOGRAFT_REJECTION	HALLMARK_ALLOGRAFT_REJECTION	195	-0.219742	-0.971794	0.5363	0.581198	0.208008	3378	tags=19%, list=16%, signal=17%	PF4/IFNGR2/ITGAL/PRKCG/IFNAR2/IL27RA/IL18RAP/CXCR3/FLNA/TLR1/NCF4/LCP2/CD1D/ETS1/HLA-E/IL16/TLR2/PTPRC/ELF4/HLA-DOA/TAPBP/IRF4/BCL3/EIF4G3/ICAM1/HIF1A/PRKCB/IKBKB/IL4R/NLRP3/LYN/CFP/FGR/INHBB/EIF3A/HCLS1/MMP9/ITGB2
HALLMARK_PANCREAS_BETA_CELLS	HALLMARK_PANCREAS_BETA_CELLS	40	0.238775	0.957706	0.546326	0.581198	0.208008	5150	tags=40%, list=24%, signal=30%	G6PC2/SRP14/LMO2/SRP9/PAX6/PKLR/SRPRB/IAPP/PAX4/PAK3/GCG/SLC2A2/NKX6-1/DCX/PCSK1/PDX1
HALLMARK_FATTY_ACID_METABOLISM	HALLMARK_FATTY_ACID_METABOLISM	155	-0.217863	-0.940232	0.622871	0.648824	0.232211	5383	tags=32%, list=25%, signal=24%	INMT/ACSL5/VNN1/S100A10/FMO1/G0S2/ADIPOR2/HSDL2/CA2/ENO3/ALDH3A2/ACSS1/D2HGDH/ADH1C/EPHX1/DLD/ALDH1A1/HIBCH/ACAA1/FASN/GLUL/NSDHL/BCKDHB/YWHAH/METAP1/ELOVL5/DECR1/GAD2/SDHC/PDHA1/FABP2/CRAT/ALAD/HSD17B4/CPT1A/CD1D/ALDOA/SDHA/TP53INP2/MGLL/PPARA/CA4/ALDH9A1/GABARAPL1/HADHB/ACO2/ACSL1/AOC3/ACOX1
HALLMARK_KRAS_SIGNALING_DN	HALLMARK_KRAS_SIGNALING_DN	186	-0.207285	-0.9123	0.685207	0.699191	0.250237	7135	tags=35%, list=33%, signal=24%	SLC30A3/KRT4/DTNB/CD40LG/AMBN/PRODH/CCR8/VPREB1/SYNPO/PDK2/PNMT/GRID2/CD207/TFF2/KRT5/ITIH3/SERPINB2/SIDT1/LYPD3/IRS4/UPK3B/SSTR4/ENTPD7/SLC38A3/RYR1/NOS1/KCNE2/KRT1/EPHA5/PCDHB1/AKR1B10/CCDC106/NR4A2/YBX2/SLC29A3/BTG2/CDKAL1/CHST2/ABCB11/MSH5/SLC6A14/MEFV/MTHFR/SLC6A3/SCN10A/CELSR2/EGF/FGGY/NUDT11/TCF7L1/STAG3/ZBTB16/SPHK2/TG/KCND1/ASB7/TLX1/EDN1/SNN/FGF16/SGK1/NR6A1/PTPRJ/MAST3/CAMK1D
HALLMARK_SPERMATOGENESIS	HALLMARK_SPERMATOGENESIS	132	-0.208894	-0.888713	0.720497	0.720497	0.257862	5257	tags=27%, list=25%, signal=21%	SHE/CLVS1/NOS1/TOPBP1/HSPA2/NPY5R/PRKAR2A/PARP2/PIAS2/PEBP1/ELOVL3/MTNR1A/HSPA1L/ACRV1/YBX2/STRBP/MLLT10/ODF1/MAP7/TCP11/HOXB1/ADAD1/NF2/IFT88/PGS1/ZC3H14/SPATA6/GMCL1/NPHP1/PDHA2/MTOR/AGFG1/MAST2/NEFH/TLE4/TALDO1
